# Supplementary material for: Reversing protonation of weakly basic drugs greatly enhances intracellular diffusion and decreases lysosomal sequestration
Source: eLife. 2024 Dec 6;13:RP97255. doi: 10.7554/eLife.97255 (PMC11623935; doi:10.7554/eLife.97255)
Supplement: Appendix 1—figure 5—source data 1. [file elife-97255-app1-fig5-data1.xlsx]

## Sheet: Appendix1-Figure5-A
% of Volume above threshhold colocalized	GSK3 inhib. in Cytoplasm	Mitoxantrone in Cytoplasm	Quinacrine in Cytoplasm							Colocalization within Lysosomes
	38.32	79.68	8.4
	49.93	80.36	37.85
	27.9	67.64	25.9
	34.89	80.7	33.28
	45.03	68.38	8.02
	48.92	78.49	12.23
	48.03	73.79	41.91
	40.68	81.1	39.09
	53.72	64.05	42.83
	42	8.38	26.43
			39.53
			29.61
			17.34
			20.74
			5.9
			22.16
			89.45
			73.49
			46.1
			32.72
			12.38
			8.54
			65.86

## Sheet: Appendix1-Figure5-B
% of Material above threshhold colocalized	GSK3 inhib. in Cytoplasm	Mitoxantrone in Cytoplasm	Quinacrine in Cytoplasm
	44.39	83.92	26.37
	56.43	83.57	46.68
	37.88	71.72	36.04
	45.27	83.94	41.15
	51.64	72.4	13.61
	57.52	81.41	23.77
	55.22	78.9	49.59
	48.39	84.74	49.51
	61.05	67.61	51.21
	49.77	17.88	38.81
			49.63
			37.24
			29.72
			32.7
			17.51
			32.53
			89.94
			76.17
			53.4
			41.62
			23.65
			17.06
			70.11
