# Supplementary material for: Reversing protonation of weakly basic drugs greatly enhances intracellular diffusion and decreases lysosomal sequestration
Source: eLife. 2024 Dec 6;13:RP97255. doi: 10.7554/eLife.97255 (PMC11623935; doi:10.7554/eLife.97255)
Supplement: Figure 2—source data 1. [file elife-97255-fig2-data1.xlsx]

## Sheet: Figure 2C
time (ms)	averaged Fl. Intensity (A.U.)	time axis (with out bleach durations, adjusted)	averaged Fl. Intensity (with out the bleach region)	time axis adjusted (X-axis)	NORMALIZED Fl. Intensity (To Fit the data)
0	1044.32	-13.8298	1044.32	-13.8298	0.926435		Pre-Bleach
1.25726	1107.08	-12.5726	1107.08	-12.5726	0.982102		Duration of Bleach(Bleach Pulse)
2.51451	1095.08	-11.3153	1095.08	-11.3153	0.971461		Post-Bleach (Recovery)
3.77177	1125.64	-10.0581	1125.64	-10.0581	0.998568
5.02903	1123.45	-8.8008	1123.45	-8.8008	0.996629
6.28629	1115.39	-7.54354	1115.39	-7.54354	0.98948
7.54354	1106.87	-6.28629	1106.87	-6.28629	0.981919
8.8008	1127.25	-5.02903	1127.25	-5.02903	1
10.0581	1105.02	-3.77177	1105.02	-3.77177	0.980283
11.3153	1099.83	-2.51451	1099.83	-2.51451	0.975679
12.5726	1092.76	-1.25726	1092.76	-1.25726	0.969405
13.8298	2727.21	0	148.213	0	0.131482
15.0871	2293.32	1.25726	193.825	1.25726	0.171945
16.3443	2124.21	2.51451	228.177	2.51451	0.202419
17.6016	2114.19	3.77177	265.502	3.77177	0.23553
18.8589	1921.34	5.02903	291.977	5.02903	0.259017
20.1161	1778.81	6.28629	311.749	6.28629	0.276557
21.3734	1669.49	7.54354	334.738	7.54354	0.296951
22.6306	1550.34	8.8008	369.677	8.8008	0.327946
23.8879	1414.06	10.0581	383.116	10.0581	0.339868
25.1451	1660.85	11.3153	399.633	11.3153	0.35452
26.4024	1544.68	12.5726	409.708	12.5726	0.363458
27.6597	1461.31	13.8298	442.434	13.8298	0.39249
28.9169	1466.53	15.0871	455.759	15.0871	0.40431
30.1742	1469.66	16.3443	458.579	16.3443	0.406812
31.4314	1500.36	17.6016	463.008	17.6016	0.410741
32.6887	1448.09	18.8589	512.572	18.8589	0.45471
33.9459	1448.8	20.1161	487.748	20.1161	0.432688
35.2032	1431.29	21.3734	511.679	21.3734	0.453917
36.4605	159.974	22.6306	522.623	22.6306	0.463626
37.7177	1314.89	23.8879	550.313	23.8879	0.48819
38.975	1320.39	25.1451	563.764	25.1451	0.500123
40.2322	1298.59	26.4024	519.107	26.4024	0.460507
41.4895	1288.88	27.6597	533.193	27.6597	0.473003
42.7467	1273.23	28.9169	545.966	28.9169	0.484334
44.004	1272.29	30.1742	551.767	30.1742	0.48948
45.2613	1232.68	31.4314	561.459	31.4314	0.498078
46.5185	1192.65	32.6887	587.941	32.6887	0.521571
47.7758	1157.07	33.9459	577.344	33.9459	0.51217
49.033	1197.13	35.2032	592.446	35.2032	0.525567
50.2903	1125.93	36.4605	605.487	36.4605	0.537136
51.5475	1133.47	37.7177	599.479	37.7177	0.531806
52.8048	1180.51	38.975	604.893	38.975	0.536609
54.0621	1200.36	40.2322	649.625	40.2322	0.576291
55.3193	1154.72	41.4895	653.648	41.4895	0.57986
56.5766	1126.15	42.7467	647.397	42.7467	0.574315
57.8338	1109.23	44.004	632.333	44.004	0.560951
59.0911	1052.38	45.2613	634.833	45.2613	0.563169
60.3483	124.102	46.5185	641.931	46.5185	0.569466
61.6056	1249.58	47.7758	692.516	47.7758	0.614341
62.8629	1169.81	49.033	653.221	49.033	0.579482
64.1201	1154.61	50.2903	672.795	50.2903	0.596846
65.3774	1139.29	51.5475	668.008	51.5475	0.592599
66.6346	1116.62	52.8048	662.802	52.8048	0.587981
67.8919	1170.19	54.0621	681.157	54.0621	0.604264
69.1491	1214.89	55.3193	694.689	55.3193	0.616268
70.4064	1211.44	56.5766	702.328	56.5766	0.623045
71.6637	1152.15	57.8338	690.718	57.8338	0.612746
72.9209	1028.1	59.0911	684.339	59.0911	0.607087
74.1782	971.239	60.3483	689.752	60.3483	0.611889
75.4354	965.851	61.6056	696.603	61.6056	0.617967
76.6927	148.213	62.8629	693.062	62.8629	0.614825
77.95	193.825	64.1201	685.68	64.1201	0.608277
79.2072	228.177	65.3774	714.59	65.3774	0.633923
80.4645	265.502	66.6346	673.221	66.6346	0.597224
81.7217	291.977	67.8919	691.597	67.8919	0.613525
82.979	311.749	69.1491	706.216	69.1491	0.626494
84.2362	334.738	70.4064	725.316	70.4064	0.643438
85.4935	369.677	71.6637	714.672	71.6637	0.633996
86.7508	383.116	72.9209	727.764	72.9209	0.64561
88.008	399.633	74.1782	744.364	74.1782	0.660336
89.2653	409.708	75.4354	725.687	75.4354	0.643767
90.5225	442.434	76.6927	734.351	76.6927	0.651453
91.7798	455.759	77.95	724.469	77.95	0.642686
93.037	458.579	79.2072	749.528	79.2072	0.664917
94.2943	463.008	80.4645	727.02	80.4645	0.644949
95.5516	512.572	81.7217	749.167	81.7217	0.664597
96.8088	487.748	82.979	737.061	82.979	0.653857
98.0661	511.679	84.2362	739.566	84.2362	0.656079
99.3233	522.623	85.4935	762.998	85.4935	0.676867
100.581	550.313	86.7508	766.134	86.7508	0.679649
101.838	563.764	88.008	738.021	88.008	0.654709
103.095	519.107	89.2653	736.592	89.2653	0.653441
104.352	533.193	90.5225	772.077	90.5225	0.68492
105.61	545.966	91.7798	753.305	91.7798	0.668267
106.867	551.767	93.037	779.811	93.037	0.691782
108.124	561.459	94.2943	787.744	94.2943	0.698819
109.381	587.941	95.5516	771.784	95.5516	0.68466
110.639	577.344	96.8088	771.203	96.8088	0.684145
111.896	592.446	98.0661	782.566	98.0661	0.694225
113.153	605.487	99.3233	777.689	99.3233	0.689898
114.41	599.479	100.581	763.605	100.581	0.677405
115.668	604.893	101.838	762.313	101.838	0.676259
116.925	649.625	103.095	779.41	103.095	0.691425
118.182	653.648	104.352	792.961	104.352	0.703447
119.439	647.397	105.61	784.905	105.61	0.6963
120.697	632.333	106.867	817.369	106.867	0.725099
121.954	634.833	108.124	777.354	108.124	0.689602
123.211	641.931	109.381	821.608	109.381	0.72886
124.468	692.516	110.639	782.816	110.639	0.694447
125.726	653.221	111.896	813.575	111.896	0.721734
126.983	672.795	113.153	766.307	113.153	0.679801
128.24	668.008	114.41	788.938	114.41	0.699878
129.497	662.802	115.668	790.977	115.668	0.701687
130.755	681.157	116.925	788.477	116.925	0.699469
132.012	694.689	118.182	804.948	118.182	0.71408
133.269	702.328	119.439	803.813	119.439	0.713074
134.527	690.718	120.697	812.83	120.697	0.721072
135.784	684.339	121.954	813.697	121.954	0.721842
137.041	689.752	123.211	806.293	123.211	0.715274
138.298	696.603	124.468	818.784	124.468	0.726354
139.556	693.062	125.726	789.623	125.726	0.700486
140.813	685.68	126.983	819.77	126.983	0.72723
142.07	714.59	128.24	818.267	128.24	0.725896
143.327	673.221	129.497	819.459	129.497	0.726954
144.585	691.597	130.755	826.634	130.755	0.733319
145.842	706.216	132.012	814.793	132.012	0.722815
147.099	725.316	133.269	787.295	133.269	0.698421
148.356	714.672	134.527	810.611	134.527	0.719105
149.614	727.764	135.784	831.854	135.784	0.737949
150.871	744.364	137.041	827.356	137.041	0.733959
152.128	725.687	138.298	821.344	138.298	0.728626
153.385	734.351	139.556	838.974	139.556	0.744265
154.643	724.469	140.813	832.82	140.813	0.738806
155.9	749.528	142.07	822.425	142.07	0.729584
157.157	727.02	143.327	854.161	143.327	0.757738
158.414	749.167	144.585	798.582	144.585	0.708433
159.672	737.061	145.842	836.474	145.842	0.742048
160.929	739.566	147.099	846.038	147.099	0.750532
162.186	762.998	148.356	825.385	148.356	0.732211
163.443	766.134	149.614	815.375	149.614	0.723331
164.701	738.021	150.871	832.344	150.871	0.738384
165.958	736.592	152.128	832.559	152.128	0.738575
167.215	772.077	153.385	831.705	153.385	0.737817
168.472	753.305	154.643	820.134	154.643	0.727553
169.73	779.811	155.9	836.495	155.9	0.742067
170.987	787.744	157.157	821.144	157.157	0.728449
172.244	771.784	158.414	810.575	158.414	0.719073
173.502	771.203	159.672	830.057	159.672	0.736356
174.759	782.566	160.929	836.618	160.929	0.742176
176.016	777.689	162.186	831.757	162.186	0.737864
177.273	763.605	163.443	830.992	163.443	0.737184
178.531	762.313	164.701	838.485	164.701	0.743832
179.788	779.41	165.958	844.81	165.958	0.749443
181.045	792.961	167.215	841.539	167.215	0.746541
182.302	784.905	168.472	843.464	168.472	0.748249
183.56	817.369	169.73	846.877	169.73	0.751276
184.817	777.354	170.987	858.572	170.987	0.761651
186.074	821.608	172.244	840.69	172.244	0.745788
187.331	782.816	173.502	849.498	173.502	0.753602
188.589	813.575	174.759	854.152	174.759	0.757731
189.846	766.307	176.016	855.192	176.016	0.758653
191.103	788.938	177.273	847.334	177.273	0.751682
192.36	790.977	178.531	837.923	178.531	0.743333
193.618	788.477	179.788	815.777	179.788	0.723687
194.875	804.948	181.045	861.151	181.045	0.763939
196.132	803.813	182.302	831.626	182.302	0.737747
197.389	812.83	183.56	841.467	183.56	0.746477
198.647	813.697	184.817	894.592	184.817	0.793605
199.904	806.293	186.074	866.925	186.074	0.769061
201.161	818.784	187.331	871.544	187.331	0.773159
202.418	789.623	188.589	838.854	188.589	0.744159
203.676	819.77	189.846	872.662	189.846	0.774151
204.933	818.267	191.103	864.37	191.103	0.766795
206.19	819.459	192.36	869.457	192.36	0.771308
207.447	826.634	193.618	890.898	193.618	0.790328
208.705	814.793	194.875	830.402	194.875	0.736661
209.962	787.295	196.132	885.333	196.132	0.785391
211.219	810.611	197.389	848.544	197.389	0.752756
212.476	831.854	198.647	867.182	198.647	0.769289
213.734	827.356	199.904	857.061	199.904	0.760311
214.991	821.344	201.161	846.398	201.161	0.750852
216.248	838.974	202.418	863.207	202.418	0.765763
217.506	832.82	203.676	850.564	203.676	0.754547
218.763	822.425	204.933	870.233	204.933	0.771996
220.02	854.161	206.19	891.198	206.19	0.790595
221.277	798.582	207.447	864.979	207.447	0.767335
222.535	836.474	208.705	840.282	208.705	0.745426
223.792	846.038	209.962	876.698	209.962	0.777731
225.049	825.385	211.219	877.895	211.219	0.778793
226.306	815.375	212.476	858.766	212.476	0.761823
227.564	832.344	213.734	852.075	213.734	0.755888
228.821	832.559	214.991	886.134	214.991	0.786102
230.078	831.705	216.248	868.997	216.248	0.770899
231.335	820.134	217.506	884.602	217.506	0.784743
232.593	836.495	218.763	852.172	218.763	0.755974
233.85	821.144	220.02	889.943	220.02	0.789481
235.107	810.575	221.277	868.731	221.277	0.770664
236.364	830.057	222.535	892.025	222.535	0.791328
237.622	836.618	223.792	862.005	223.792	0.764697
238.879	831.757	225.049	886.592	225.049	0.786508
240.136	830.992	226.306	891.389	226.306	0.790763
241.393	838.485	227.564	873.91	227.564	0.775258
242.651	844.81	228.821	847.434	228.821	0.751771
243.908	841.539	230.078	879.634	230.078	0.780336
245.165	843.464	231.335	861.148	231.335	0.763936
246.422	846.877	232.593	863.623	232.593	0.766132
247.68	858.572	233.85	910.308	233.85	0.807547
248.937	840.69	235.107	866.421	235.107	0.768614
250.194	849.498	236.364	871.018	236.364	0.772692
251.451	854.152	237.622	874.028	237.622	0.775362
252.709	855.192	238.879	869.751	238.879	0.771568
253.966	847.334	240.136	908.752	240.136	0.806167
255.223	837.923	241.393	848.234	241.393	0.752481
256.48	815.777	242.651	857.959	242.651	0.761107
257.738	861.151	243.908	875.998	243.908	0.77711
258.995	831.626	245.165	855.995	245.165	0.759365
260.252	841.467	246.422	886.731	246.422	0.786632
261.51	894.592	247.68	878.618	247.68	0.779434
262.767	866.925	248.937	909.952	248.937	0.807232
264.024	871.544	250.194	883.561	250.194	0.783819
265.281	838.854	251.451	881.885	251.451	0.782333
266.539	872.662	252.709	870.156	252.709	0.771927
267.796	864.37	253.966	898.251	253.966	0.796851
269.053	869.457	255.223	871.423	255.223	0.773052
270.31	890.898	256.48	876.354	256.48	0.777426
271.568	830.402	257.738	885.602	257.738	0.78563
272.825	885.333	258.995	866.872	258.995	0.769014
274.082	848.544	260.252	872.433	260.252	0.773947
275.339	867.182	261.51	872.707	261.51	0.77419
276.597	857.061	262.767	900.151	262.767	0.798536
277.854	846.398	264.024	912.79	264.024	0.809749
279.111	863.207	265.281	887.239	265.281	0.787082
280.368	850.564	266.539	875.354	266.539	0.776539
281.626	870.233	267.796	900.707	267.796	0.799029
282.883	891.198	269.053	889.077	269.053	0.788713
284.14	864.979	270.31	886.933	270.31	0.786811
285.397	840.282	271.568	874.83	271.568	0.776074
286.655	876.698	272.825	869.28	272.825	0.771151
287.912	877.895	274.082	869.615	274.082	0.771447
289.169	858.766	275.339	858.625	275.339	0.761698
290.426	852.075	276.597	902.662	276.597	0.800764
291.684	886.134	277.854	876.067	277.854	0.777172
292.941	868.997	279.111	886.861	279.111	0.786747
294.198	884.602	280.368	910.767	280.368	0.807954
295.455	852.172	281.626	878.584	281.626	0.779404
296.713	889.943	282.883	898.607	282.883	0.797166
297.97	868.731	284.14	898.831	284.14	0.797366
299.227	892.025	285.397	889.897	285.397	0.78944
300.484	862.005	286.655	867.097	286.655	0.769214
301.742	886.592	287.912	893.579	287.912	0.792706
302.999	891.389	289.169	889.423	289.169	0.78902
304.256	873.91	290.426	902.198	290.426	0.800353
305.514	847.434	291.684	897.079	291.684	0.795811
306.771	879.634	292.941	894.016	292.941	0.793094
308.028	861.148	294.198	895.072	294.198	0.794031
309.285	863.623	295.455	879.618	295.455	0.780321
310.543	910.308	296.713	910.403	296.713	0.807632
311.8	866.421	297.97	886.298	297.97	0.786248
313.057	871.018	299.227	899.843	299.227	0.798263
314.314	874.028	300.484	890.743	300.484	0.79019
315.572	869.751	301.742	877.607	301.742	0.778537
316.829	908.752	302.999	912.026	302.999	0.809071
318.086	848.234	304.256	894.036	304.256	0.793112
319.343	857.959	305.514	903.326	305.514	0.801353
320.601	875.998	306.771	886.856	306.771	0.786742
321.858	855.995	308.028	895.577	308.028	0.794479
323.115	886.731	309.285	896.166	309.285	0.795001
324.372	878.618	310.543	895.392	310.543	0.794315
325.63	909.952	311.8	903.502	311.8	0.801509
326.887	883.561	313.057	882.672	313.057	0.783031
328.144	881.885	314.314	888.867	314.314	0.788527
329.401	870.156	315.572	897.538	315.572	0.796218
330.659	898.251	316.829	891.682	316.829	0.791024
331.916	871.423	318.086	883.138	318.086	0.783444
333.173	876.354	319.343	886.936	319.343	0.786813
334.43	885.602	320.601	851.502	320.601	0.755379
335.688	866.872	321.858	912.834	321.858	0.809788
336.945	872.433	323.115	900.308	323.115	0.798676
338.202	872.707	324.372	870.208	324.372	0.771974
339.459	900.151	325.63	896.892	325.63	0.795645
340.717	912.79	326.887	873	326.887	0.774451
341.974	887.239	328.144	906.28	328.144	0.803974
343.231	875.354	329.401	908.723	329.401	0.806141
344.488	900.707	330.659	899.475	330.659	0.797937
345.746	889.077	331.916	916.074	331.916	0.812662
347.003	886.933	333.173	894.734	333.173	0.793731
348.26	874.83	334.43	897.184	334.43	0.795904
349.518	869.28	335.688	919.228	335.688	0.81546
350.775	869.615	336.945	900.843	336.945	0.79915
352.032	858.625	338.202	907.913	338.202	0.805422
353.289	902.662	339.459	923.362	339.459	0.819128
354.547	876.067	340.717	895.462	340.717	0.794377
355.804	886.861	341.974	883.243	341.974	0.783537
357.061	910.767	343.231	933.682	343.231	0.828282
358.318	878.584	344.488	911.692	344.488	0.808775
359.576	898.607	345.746	903.8	345.746	0.801774
360.833	898.831	347.003	899.402	347.003	0.797872
362.09	889.897	348.26	908.664	348.26	0.806089
363.347	867.097	349.518	924.475	349.518	0.820115
364.605	893.579	350.775	901.91	350.775	0.800097
365.862	889.423	352.032	910.728	352.032	0.807919
367.119	902.198	353.289	891.156	353.289	0.790557
368.376	897.079	354.547	901.266	354.547	0.799525
369.634	894.016	355.804	897.197	355.804	0.795916
370.891	895.072	357.061	904.511	357.061	0.802405
372.148	879.618	358.318	907.621	358.318	0.805164
373.405	910.403	359.576	894.23	359.576	0.793284
374.663	886.298	360.833	930.352	360.833	0.825329
375.92	899.843	362.09	907.333	362.09	0.804908
377.177	890.743	363.347	916.415	363.347	0.812964
378.434	877.607	364.605	908.782	364.605	0.806193
379.692	912.026	365.862	913.608	365.862	0.810475
380.949	894.036	367.119	913.536	367.119	0.810411
382.206	903.326	368.376	911.015	368.376	0.808174
383.463	886.856	369.634	891.68	369.634	0.791022
384.721	895.577	370.891	914.836	370.891	0.811564
385.978	896.166	372.148	890.141	372.148	0.789657
387.235	895.392	373.405	907.703	373.405	0.805236
388.492	903.502	374.663	923.407	374.663	0.819167
389.75	882.672	375.92	899.5	375.92	0.797959
391.007	888.867	377.177	897.72	377.177	0.79638
392.264	897.538	378.434	912.252	378.434	0.809272
393.522	891.682	379.692	923.805	379.692	0.81952
394.779	883.138	380.949	935.251	380.949	0.829674
396.036	886.936	382.206	897.72	382.206	0.79638
397.293	851.502	383.463	899.064	383.463	0.797572
398.551	912.834	384.721	906.766	384.721	0.804404
399.808	900.308	385.978	915.543	385.978	0.812191
401.065	870.208	387.235	888.566	387.235	0.788259
402.322	896.892	388.492	925.364	388.492	0.820903
403.58	873	389.75	907.616	389.75	0.805159
404.837	906.28	391.007	914.92	391.007	0.811638
406.094	908.723	392.264	902.003	392.264	0.80018
407.351	899.475	393.522	918.348	393.522	0.814679
408.609	916.074	394.779	929.259	394.779	0.824359
409.866	894.734	396.036	931.603	396.036	0.826438
411.123	897.184	397.293	910.711	397.293	0.807905
412.38	919.228	398.551	917.47	398.551	0.813901
413.638	900.843	399.808	927.225	399.808	0.822554
414.895	907.913	401.065	925.015	401.065	0.820594
416.152	923.362	402.322	902.49	402.322	0.800612
417.409	895.462	403.58	922.005	403.58	0.817923
418.667	883.243	404.837	911.984	404.837	0.809033
419.924	933.682	406.094	918.579	406.094	0.814884
421.181	911.692	407.351	913.548	407.351	0.810421
422.438	903.8	408.609	921.605	408.609	0.817569
423.696	899.402	409.866	929.946	409.866	0.824968
424.953	908.664	411.123	911.097	411.123	0.808247
426.21	924.475	412.38	924.954	412.38	0.82054
427.467	901.91	413.638	929.634	413.638	0.824692
428.725	910.728	414.895	912.531	414.895	0.809519
429.982	891.156	416.152	916.715	416.152	0.813231
431.239	901.266	417.409	926.374	417.409	0.821799
432.496	897.197	418.667	957.948	418.667	0.849809
433.754	904.511	419.924	915.228	419.924	0.811911
435.011	907.621	421.181	917.034	421.181	0.813514
436.268	894.23	422.438	936.156	422.438	0.830477
437.526	930.352	423.696	912.587	423.696	0.809569
438.783	907.333	424.953	895.49	424.953	0.794402
440.04	916.415	426.21	916.467	426.21	0.813011
441.297	908.782	427.467	906.87	427.467	0.804498
442.555	913.608	428.725	903.474	428.725	0.801484
443.812	913.536	429.982	928.662	429.982	0.823829
445.069	911.015	431.239	920.108	431.239	0.816241
446.326	891.68	432.496	894.503	432.496	0.793526
447.584	914.836	433.754	915.174	433.754	0.811863
448.841	890.141	435.011	902.021	435.011	0.800196
450.098	907.703	436.268	893.941	436.268	0.793028
451.355	923.407	437.526	903.711	437.526	0.801695
452.613	899.5	438.783	954.877	438.783	0.847085
453.87	897.72	440.04	914.461	440.04	0.811231
455.127	912.252	441.297	907.123	441.297	0.804721
456.384	923.805	442.555	918.731	442.555	0.815019
457.642	935.251	443.812	907.525	443.812	0.805078
458.899	897.72	445.069	928.81	445.069	0.82396
460.156	899.064	446.326	887.47	446.326	0.787288
461.413	906.766	447.584	886.993	447.584	0.786864
462.671	915.543	448.841	927.149	448.841	0.822487
463.928	888.566	450.098	928.507	450.098	0.823691
465.185	925.364	451.355	889.648	451.355	0.789219
466.442	907.616	452.613	914.651	452.613	0.8114
467.7	914.92	453.87	932.923	453.87	0.827609
468.957	902.003	455.127	915.793	455.127	0.812413
470.214	918.348	456.384	938.367	456.384	0.832439
471.471	929.259	457.642	926.323	457.642	0.821754
472.729	931.603	458.899	939.766	458.899	0.833679
473.986	910.711	460.156	929.475	460.156	0.824551
475.243	917.47	461.413	931.056	461.413	0.825953
476.501	927.225	462.671	929.984	462.671	0.825001
477.758	925.015	463.928	929.63	463.928	0.824687
479.015	902.49	465.185	927.885	465.185	0.82314
480.272	922.005	466.442	921.993	466.442	0.817913
481.53	911.984	467.7	933.193	467.7	0.827849
482.787	918.579	468.957	909.457	468.957	0.806792
484.044	913.548	470.214	922.479	470.214	0.818344
485.301	921.605	471.471	921.47	471.471	0.817449
486.559	929.946	472.729	935.697	472.729	0.83007
487.816	911.097	473.986	940.985	473.986	0.834761
489.073	924.954	475.243	912.67	475.243	0.809643
490.33	929.634	476.501	891.897	476.501	0.791214
491.588	912.531	477.758	946.825	477.758	0.839941
492.845	916.715	479.015	936.902	479.015	0.831139
494.102	926.374	480.272	918.116	480.272	0.814474
495.359	957.948	481.53	925.321	481.53	0.820866
496.617	915.228	482.787	946.059	482.787	0.839262
497.874	917.034	484.044	907.682	484.044	0.805217
499.131	936.156	485.301	931.507	485.301	0.826353
500.388	912.587	486.559	915.513	486.559	0.812165
501.646	895.49	487.816	933.733	487.816	0.828327
502.903	916.467	489.073	948.472	489.073	0.841403
504.16	906.87	490.33	932.3	490.33	0.827056
505.417	903.474	491.588	915.159	491.588	0.81185
506.675	928.662	492.845	926.639	492.845	0.822035
507.932	920.108	494.102	939.2	494.102	0.833177
509.189	894.503	495.359	938.118	495.359	0.832218
510.446	915.174	496.617	907.225	496.617	0.804812
511.704	902.021	497.874	923.126	497.874	0.818918
512.961	893.941	499.131	904.134	499.131	0.80207
514.218	903.711	500.388	901.028	500.388	0.799314
515.475	954.877	501.646	935.233	501.646	0.829658
516.733	914.461	502.903	928.284	502.903	0.823493
517.99	907.123	504.16	949.105	504.16	0.841964
519.247	918.731	505.417	921.705	505.417	0.817657
520.505	907.525	506.675	908.674	506.675	0.806097
521.762	928.81	507.932	906.398	507.932	0.804079
523.019	887.47	509.189	917.01	509.189	0.813492
524.276	886.993	510.446	971.002	510.446	0.861389
525.534	927.149	511.704	955.682	511.704	0.847799
526.791	928.507	512.961	914.554	512.961	0.811314
528.048	889.648	514.218	944.51	514.218	0.837888
529.305	914.651	515.475	947.625	515.475	0.840651
530.563	932.923	516.733	912.777	516.733	0.809737
531.82	915.793	517.99	920.043	517.99	0.816183
533.077	938.367	519.247	939.22	519.247	0.833195
534.334	926.323	520.505	916.538	520.505	0.813073
535.592	939.766	521.762	927.746	521.762	0.823016
536.849	929.475	523.019	927.534	523.019	0.822829
538.106	931.056	524.276	934.485	524.276	0.828995
539.363	929.984	525.534	948.472	525.534	0.841403
540.621	929.63	526.791	931.746	526.791	0.826565
541.878	927.885	528.048	926.37	528.048	0.821796
543.135	921.993	529.305	932.448	529.305	0.827187
544.392	933.193	530.563	939.092	530.563	0.833081
545.65	909.457	531.82	929.189	531.82	0.824296
546.907	922.479	533.077	906.556	533.077	0.804218
548.164	921.47	534.334	914.446	534.334	0.811218
549.421	935.697	535.592	964.097	535.592	0.855264
550.679	940.985	536.849	925.825	536.849	0.821312
551.936	912.67	538.106	912.039	538.106	0.809083
553.193	891.897	539.363	939.872	539.363	0.833774
554.45	946.825	540.621	921.815	540.621	0.817755
555.708	936.902	541.878	946.739	541.878	0.839866
556.965	918.116	543.135	920.405	543.135	0.816504
558.222	925.321	544.392	949.377	544.392	0.842206
559.479	946.059	545.65	911.546	545.65	0.808645
560.737	907.682	546.907	931.475	546.907	0.826325
561.994	931.507	548.164	934.269	548.164	0.828803
563.251	915.513	549.421	921.611	549.421	0.817574
564.509	933.733	550.679	948.552	550.679	0.841474
565.766	948.472	551.936	939.679	551.936	0.833602
567.023	932.3	553.193	933.83	553.193	0.828413
568.28	915.159	554.45	939.731	554.45	0.833649
569.538	926.639	555.708	938.505	555.708	0.832561
570.795	939.2	556.965	921.567	556.965	0.817535
572.052	938.118	558.222	911.47	558.222	0.808578
573.309	907.225	559.479	923.636	559.479	0.81937
574.567	923.126	560.737	938.803	560.737	0.832826
575.824	904.134	561.994	927.762	561.994	0.823031
577.081	901.028	563.251	929.684	563.251	0.824735
578.338	935.233	564.509	912.393	564.509	0.809397
579.596	928.284	565.766	920.259	565.766	0.816375
580.853	949.105	567.023	957.951	567.023	0.849812
582.11	921.705	568.28	935.626	568.28	0.830007
583.367	908.674	569.538	917.348	569.538	0.813792
584.625	906.398	570.795	937.415	570.795	0.831594
585.882	917.01	572.052	925.431	572.052	0.820963
587.139	971.002	573.309	956.172	573.309	0.848234
588.396	955.682	574.567	934.874	574.567	0.82934
589.654	914.554	575.824	976.069	575.824	0.865884
590.911	944.51	577.081	945.59	577.081	0.838846
592.168	947.625	578.338	945.477	578.338	0.838746
593.425	912.777	579.596	919.198	579.596	0.815434
594.683	920.043	580.853	914.608	580.853	0.811362
595.94	939.22	582.11	938.761	582.11	0.832788
597.197	916.538	583.367	937.19	583.367	0.831395
598.454	927.746	584.625	951.098	584.625	0.843733
599.712	927.534	585.882	937.32	585.882	0.831509
600.969	934.485	587.139	953.243	587.139	0.845635
602.226	948.472	588.396	931.1	588.396	0.825992
603.483	931.746	589.654	947.866	589.654	0.840865
604.741	926.37	590.911	908.03	590.911	0.805526
605.998	932.448	592.168	932.711	592.168	0.827421
607.255	939.092	593.425	949.223	593.425	0.842069
608.513	929.189	594.683	925.521	594.683	0.821043
609.77	906.556	595.94	941.187	595.94	0.83494
611.027	914.446	597.197	919.739	597.197	0.815914
612.284	964.097	598.454	936.502	598.454	0.830784
613.542	925.825	599.712	935.643	599.712	0.830022
614.799	912.039	600.969	946.346	600.969	0.839517
616.056	939.872	602.226	924.916	602.226	0.820506
617.313	921.815	603.483	945.351	603.483	0.838634
618.571	946.739	604.741	950.372	604.741	0.843088
619.828	920.405	605.998	902.574	605.998	0.800686
621.085	949.377	607.255	960.567	607.255	0.852133
622.342	911.546	608.513	924.249	608.513	0.819914
623.6	931.475	609.77	952.797	609.77	0.845239
624.857	934.269	611.027	930.128	611.027	0.825129
626.114	921.611	612.284	930.325	612.284	0.825304
627.371	948.552	613.542	948.223	613.542	0.841182
628.629	939.679	614.799	930.316	614.799	0.825297
629.886	933.83	616.056	954.161	616.056	0.846449
631.143	939.731	617.313	920.779	617.313	0.816836
632.4	938.505	618.571	919.128	618.571	0.815371
633.658	921.567	619.828	950.526	619.828	0.843225
634.915	911.47	621.085	949.426	621.085	0.842249
636.172	923.636	622.342	945.451	622.342	0.838723
637.429	938.803	623.6	942.639	623.6	0.836229
638.687	927.762	624.857	911.875	624.857	0.808937
639.944	929.684	626.114	925.611	626.114	0.821123
641.201	912.393	627.371	937.679	627.371	0.831828
642.458	920.259	628.629	924.652	628.629	0.820272
643.716	957.951	629.886	952.034	629.886	0.844563
644.973	935.626	631.143	930.882	631.143	0.825798
646.23	917.348	632.4	941.48	632.4	0.8352
647.487	937.415	633.658	939.989	633.658	0.833877
648.745	925.431	634.915	957.83	634.915	0.849704
650.002	956.172	636.172	928.03	636.172	0.823268
651.259	934.874	637.429	921.269	637.429	0.817271
652.517	976.069	638.687	954.936	638.687	0.847137
653.774	945.59	639.944	921.664	639.944	0.817621
655.031	945.477	641.201	961.546	641.201	0.853001
656.288	919.198	642.458	953.351	642.458	0.845731
657.546	914.608	643.716	912.487	643.716	0.80948
658.803	938.761	644.973	917.213	644.973	0.813673
660.06	937.19	646.23	947.693	646.23	0.840712
661.317	951.098	647.487	924.39	647.487	0.820039
662.575	937.32	648.745	948.598	648.745	0.841515
663.832	953.243	650.002	950.382	650.002	0.843097
665.089	931.1	651.259	956.208	651.259	0.848266
666.346	947.866	652.517	915.395	652.517	0.81206
667.604	908.03	653.774	940.554	653.774	0.834379
668.861	932.711	655.031	962.225	655.031	0.853603
670.118	949.223	656.288	926.952	656.288	0.822313
671.375	925.521	657.546	942.334	657.546	0.835958
672.633	941.187	658.803	950.295	658.803	0.84302
673.89	919.739	660.06	957.787	660.06	0.849666
675.147	936.502	661.317	958.403	661.317	0.850213
676.404	935.643	662.575	953.008	662.575	0.845427
677.662	946.346	663.832	928.951	663.832	0.824085
678.919	924.916	665.089	944.116	665.089	0.837539
680.176	945.351	666.346	956.577	666.346	0.848593
681.433	950.372	667.604	935.611	667.604	0.829994
682.691	902.574	668.861	944.544	668.861	0.837918
683.948	960.567	670.118	944.125	670.118	0.837546
685.205	924.249	671.375	927.064	671.375	0.822411
686.462	952.797	672.633	907.382	672.633	0.804951
687.72	930.128	673.89	946.639	673.89	0.839777
688.977	930.325	675.147	943.961	675.147	0.837401
690.234	948.223	676.404	964.146	676.404	0.855307
691.491	930.316	677.662	920.564	677.662	0.816645
692.749	954.161	678.919	951.92	678.919	0.844461
694.006	920.779	680.176	920.361	680.176	0.816465
695.263	919.128	681.433	957.134	681.433	0.849087
696.521	950.526	682.691	954.203	682.691	0.846487
697.778	949.426	683.948	949.398	683.948	0.842225
699.035	945.451	685.205	967.026	685.205	0.857863
700.292	942.639	686.462	935.569	686.462	0.829956
701.55	911.875	687.72	957.02	687.72	0.848986
702.807	925.611	688.977	949.708	688.977	0.842499
704.064	937.679	690.234	920.37	690.234	0.816474
705.321	924.652	691.491	949.01	691.491	0.84188
706.579	952.034	692.749	910.226	692.749	0.807474
707.836	930.882	694.006	928.8	694.006	0.823951
709.093	941.48	695.263	969.423	695.263	0.859989
710.35	939.989	696.521	938.808	696.521	0.83283
711.608	957.83	697.778	940.279	697.778	0.834134
712.865	928.03	699.035	934.951	699.035	0.829408
714.122	921.269	700.292	945.126	700.292	0.838435
715.379	954.936	701.55	940.52	701.55	0.834348
716.637	921.664	702.807	945.58	702.807	0.838838
717.894	961.546	704.064	926.972	704.064	0.82233
719.151	953.351	705.321	912.628	705.321	0.809605
720.408	912.487	706.579	967.639	706.579	0.858406
721.666	917.213	707.836	933.628	707.836	0.828234
722.923	947.693	709.093	961.139	709.093	0.85264
724.18	924.39	710.35	969.411	710.35	0.859979
725.437	948.598	711.608	937.259	711.608	0.831456
726.695	950.382	712.865	916.384	712.865	0.812937
727.952	956.208	714.122	930.403	714.122	0.825374
729.209	915.395	715.379	932.798	715.379	0.827498
730.466	940.554	716.637	953.713	716.637	0.846052
731.724	962.225	717.894	952.182	717.894	0.844694
732.981	926.952	719.151	967.484	719.151	0.858268
734.238	942.334	720.408	958.907	720.408	0.850659
735.495	950.295	721.666	951.436	721.666	0.844032
736.753	957.787	722.923	959.557	722.923	0.851237
738.01	958.403	724.18	947.58	724.18	0.840612
739.267	953.008	725.437	951.267	725.437	0.843882
740.525	928.951	726.695	961.803	726.695	0.853229
741.782	944.116	727.952	942.47	727.952	0.836079
743.039	956.577	729.209	947.174	729.209	0.840251
744.296	935.611	730.466	915.469	730.466	0.812125
745.554	944.544	731.724	967.402	731.724	0.858196
746.811	944.125	732.981	932.964	732.981	0.827645
748.068	927.064	734.238	963.934	734.238	0.85512
749.325	907.382	735.495	933.689	735.495	0.828288
750.583	946.639	736.753	938.002	736.753	0.832114
751.84	943.961	738.01	939.357	738.01	0.833317
753.097	964.146	739.267	961.043	739.267	0.852554
754.354	920.564	740.525	960.289	740.525	0.851885
755.612	951.92	741.782	957.731	741.782	0.849617
756.869	920.361	743.039	937.162	743.039	0.83137
758.126	957.134	744.296	963.208	744.296	0.854475
759.383	954.203	745.554	945.246	745.554	0.838541
760.641	949.398	746.811	936.944	746.811	0.831176
761.898	967.026	748.068	917.918	748.068	0.814298
763.155	935.569	749.325	926.207	749.325	0.821651
764.412	957.02	750.583	934.462	750.583	0.828975
765.67	949.708	751.84	942.562	751.84	0.83616
766.927	920.37	753.097	956.867	753.097	0.84885
768.184	949.01	754.354	966.656	754.354	0.857534
769.441	910.226	755.612	939.161	755.612	0.833143
770.699	928.8	756.869	968.51	756.869	0.859179
771.956	969.423	758.126	932.959	758.126	0.827641
773.213	938.808	759.383	955.974	759.383	0.848058
774.47	940.279	760.641	950.618	760.641	0.843307
775.728	934.951	761.898	946.6	761.898	0.839742
776.985	945.126	763.155	968.82	763.155	0.859454
778.242	940.52	764.412	941.015	764.412	0.834787
779.499	945.58	765.67	916.054	765.67	0.812644
780.757	926.972	766.927	965.7	766.927	0.856686
782.014	912.628	768.184	950.384	768.184	0.843099
783.271	967.639	769.441	935.887	769.441	0.830238
784.529	933.628	770.699	957.236	770.699	0.849178
785.786	961.139	771.956	952.562	771.956	0.845031
787.043	969.411	773.213	943.444	773.213	0.836943
788.3	937.259	774.47	961.102	774.47	0.852607
789.558	916.384	775.728	958.351	775.728	0.850166
790.815	930.403	776.985	965.821	776.985	0.856794
792.072	932.798	778.242	974.382	778.242	0.864388
793.329	953.713	779.499	936.356	779.499	0.830654
794.587	952.182	780.757	947.977	780.757	0.840964
795.844	967.484	782.014	918.913	782.014	0.815181
797.101	958.907	783.271	948.666	783.271	0.841575
798.358	951.436	784.529	939.541	784.529	0.83348
799.616	959.557	785.786	942.962	785.786	0.836515
800.873	947.58	787.043	960.33	787.043	0.851922
802.13	951.267	788.3	942.926	788.3	0.836483
803.387	961.803	789.558	930.687	789.558	0.825625
804.645	942.47	790.815	963.21	790.815	0.854477
805.902	947.174	792.072	952.272	792.072	0.844774
807.159	915.469	793.329	945	793.329	0.838323
808.416	967.402	794.587	943.754	794.587	0.837217
809.674	932.964	795.844	946.449	795.844	0.839608
810.931	963.934	797.101	940.233	797.101	0.834094
812.188	933.689	798.358	959.341	798.358	0.851045
813.445	938.002	799.616	931.211	799.616	0.826091
814.703	939.357	800.873	941.289	800.873	0.83503
815.96	961.043	802.13	943.285	802.13	0.836802
817.217	960.289	803.387	948.97	803.387	0.841845
818.474	957.731	804.645	955.546	804.645	0.847678
819.732	937.162	805.902	964.233	805.902	0.855384
820.989	963.208	807.159	910.18	807.159	0.807434
822.246	945.246	808.416	942.652	808.416	0.83624
823.504	936.944	809.674	940.987	809.674	0.834763
824.761	917.918	810.931	966.077	810.931	0.85702
826.018	926.207	812.188	954.303	812.188	0.846576
827.275	934.462	813.445	961.93	813.445	0.853341
828.533	942.562	814.703	930.331	814.703	0.82531
829.79	956.867	815.96	979.184	815.96	0.868648
831.047	966.656	817.217	951.021	817.217	0.843664
832.304	939.161	818.474	936.205	818.474	0.830521
833.562	968.51	819.732	939.493	819.732	0.833438
834.819	932.959	820.989	950.252	820.989	0.842982
836.076	955.974	822.246	939.51	822.246	0.833452
837.333	950.618	823.504	938.911	823.504	0.832922
838.591	946.6	824.761	952.213	824.761	0.844722
839.848	968.82	826.018	974.984	826.018	0.864922
841.105	941.015	827.275	953.374	827.275	0.845751
842.362	916.054	828.533	948.789	828.533	0.841684
843.62	965.7	829.79	950.354	829.79	0.843072
844.877	950.384	831.047	990.016	831.047	0.878257
846.134	935.887	832.304	952.534	832.304	0.845007
847.391	957.236	833.562	956.234	833.562	0.848289
848.649	952.562	834.819	941.99	834.819	0.835653
849.906	943.444	836.076	961.669	836.076	0.85311
851.163	961.102	837.333	954.139	837.333	0.84643
852.42	958.351	838.591	975.2	838.591	0.865114
853.678	965.821	839.848	935.303	839.848	0.829721
854.935	974.382	841.105	963.738	841.105	0.854945
856.192	936.356	842.362	959.841	842.362	0.851488
857.449	947.977	843.62	957.146	843.62	0.849098
858.707	918.913	844.877	962.507	844.877	0.853853
859.964	948.666	846.134	934.479	846.134	0.828989
861.221	939.541	847.391	939.51	847.391	0.833452
862.478	942.962	848.649	932.111	848.649	0.826889
863.736	960.33	849.906	951.49	849.906	0.84408
864.993	942.926	851.163	964.003	851.163	0.855181
866.25	930.687	852.42	941.215	852.42	0.834965
867.508	963.21	853.678	950.477	853.678	0.843182
868.765	952.272	854.935	956.818	854.935	0.848807
870.022	945	856.192	937.525	856.192	0.831691
871.279	943.754	857.449	952.405	857.449	0.844892
872.537	946.449	858.707	953.972	858.707	0.846282
873.794	940.233	859.964	963.692	859.964	0.854905
875.051	959.341	861.221	973.22	861.221	0.863357
876.308	931.211	862.478	943.99	862.478	0.837427
877.566	941.289	863.736	937.249	863.736	0.831447
878.823	943.285	864.993	916.777	864.993	0.813286
880.08	948.97	866.25	923.293	866.25	0.819067
881.337	955.546	867.508	940.743	867.508	0.834546
882.595	964.233	868.765	940.705	868.765	0.834513
883.852	910.18	870.022	915.941	870.022	0.812544
885.109	942.652	871.279	966.713	871.279	0.857585
886.366	940.987	872.537	962.721	872.537	0.854044
887.624	966.077	873.794	924.952	873.794	0.820538
888.881	954.303	875.051	987.859	875.051	0.876344
890.138	961.93	876.308	956.084	876.308	0.848155
891.395	930.331	877.566	956.17	877.566	0.848232
892.653	979.184	878.823	942.326	878.823	0.835951
893.91	951.021	880.08	930.933	880.08	0.825844
895.167	936.205	881.337	968.797	881.337	0.859433
896.424	939.493	882.595	981.356	882.595	0.870574
897.682	950.252	883.852	934.916	883.852	0.829377
898.939	939.51	885.109	950.3	885.109	0.843024
900.196	938.911	886.366	946.861	886.366	0.839973
901.453	952.213	887.624	969.62	887.624	0.860163
902.711	974.984	888.881	932.38	888.881	0.827128
903.968	953.374	890.138	932.989	890.138	0.827667
905.225	948.789	891.395	955.925	891.395	0.848014
906.482	950.354	892.653	945.77	892.653	0.839006
907.74	990.016	893.91	989.926	893.91	0.878177
908.997	952.534	895.167	938.331	895.167	0.832407
910.254	956.234	896.424	954.574	896.424	0.846816
911.512	941.99	897.682	946.579	897.682	0.839723
912.769	961.669	898.939	953.669	898.939	0.846013
914.026	954.139	900.196	948.221	900.196	0.84118
915.283	975.2	901.453	955.974	901.453	0.848058
916.541	935.303	902.711	968.544	902.711	0.859209
917.798	963.738	903.968	961.948	903.968	0.853357
919.055	959.841	905.225	949.582	905.225	0.842387
920.312	957.146	906.482	915.949	906.482	0.812551
921.57	962.507	907.74	956.907	907.74	0.848885
922.827	934.479	908.997	941.456	908.997	0.835179
924.084	939.51	910.254	941.389	910.254	0.835119
925.341	932.111	911.512	963.611	911.512	0.854833
926.599	951.49	912.769	931.931	912.769	0.826729
927.856	964.003	914.026	943.366	914.026	0.836873
929.113	941.215	915.283	963.295	915.283	0.854553
930.37	950.477	916.541	967.611	916.541	0.858382
931.628	956.818	917.798	981.07	917.798	0.870321
932.885	937.525	919.055	946.143	919.055	0.839336
934.142	952.405	920.312	952.841	920.312	0.845279
935.399	953.972	921.57	941.539	921.57	0.835253
936.657	963.692	922.827	994.07	922.827	0.881854
937.914	973.22	924.084	963.836	924.084	0.855032
939.171	943.99	925.341	963.284	925.341	0.854542
940.428	937.249	926.599	923.518	926.599	0.819266
941.686	916.777	927.856	938.103	927.856	0.832205
942.943	923.293	929.113	928.361	929.113	0.823562
944.2	940.743	930.37	965.766	930.37	0.856744
945.457	940.705	931.628	957.795	931.628	0.849673
946.715	915.941	932.885	955.036	932.885	0.847226
947.972	966.713	934.142	959.093	934.142	0.850825
949.229	962.721	935.399	939.931	935.399	0.833826
950.486	924.952	936.657	943.892	936.657	0.83734
951.744	987.859	937.914	938.975	937.914	0.832978
953.001	956.084	939.171	940.893	939.171	0.83468
954.258	956.17	940.428	933.631	940.428	0.828237
955.516	942.326	941.686	959.975	941.686	0.851608
956.773	930.933	942.943	947.908	942.943	0.840903
958.03	968.797	944.2	923.626	944.2	0.819362
959.287	981.356	945.457	961.946	945.457	0.853356
960.545	934.916	946.715	959.225	946.715	0.850942
961.802	950.3	947.972	943.879	947.972	0.837328
963.059	946.861	949.229	937.141	949.229	0.831351
964.316	969.62	950.486	947.361	950.486	0.840417
965.574	932.38	951.744	962.751	951.744	0.85407
966.831	932.989	953.001	954.356	953.001	0.846622
968.088	955.925	954.258	953.293	954.258	0.84568
969.345	945.77	955.516	983.47	955.516	0.87245
970.603	989.926	956.773	987.013	956.773	0.875593
971.86	938.331	958.03	950.844	958.03	0.843507
973.117	954.574	959.287	970.185	959.287	0.860665
974.374	946.579	960.545	965.292	960.545	0.856324
975.632	953.669	961.802	955.305	961.802	0.847464
976.889	948.221	963.059	948.054	963.059	0.841032
978.146	955.974	964.316	940.341	964.316	0.83419
979.403	968.544	965.574	937.187	965.574	0.831392
980.661	961.948	966.831	941.474	966.831	0.835195
981.918	949.582	968.088	972.285	968.088	0.862528
983.175	915.949	969.345	952.402	969.345	0.844889
984.432	956.907	970.603	940.641	970.603	0.834456
985.69	941.456	971.86	940.316	971.86	0.834168
986.947	941.389	973.117	978.657	973.117	0.868181
988.204	963.611	974.374	940.249	974.374	0.834108
989.461	931.931	975.632	970.843	975.632	0.861248
990.719	943.366	976.889	955.861	976.889	0.847957
991.976	963.295	978.146	961.992	978.146	0.853396
993.233	967.611	979.403	952.698	979.403	0.845152
994.49	981.07	980.661	939.333	980.661	0.833295
995.748	946.143	981.918	936.684	981.918	0.830945
997.005	952.841	983.175	963.475	983.175	0.854713
998.262	941.539	984.432	966.731	984.432	0.857601
999.52	994.07	985.69	952.19	985.69	0.844701
1000.78	963.836	986.947	937.344	986.947	0.831531
1002.03	963.284	988.204	937.589	988.204	0.831748
1003.29	923.518	989.461	942.067	989.461	0.835721
1004.55	938.103	990.719	945.284	990.719	0.838574
1005.81	928.361	991.976	927.37	991.976	0.822683
1007.06	965.766	993.233	957.526	993.233	0.849435
1008.32	957.795	994.49	949.169	994.49	0.842021
1009.58	955.036	995.748	946.762	995.748	0.839886
1010.83	959.093	997.005	981.298	997.005	0.870524
1012.09	939.931	998.262	952.659	998.262	0.845117
1013.35	943.892	999.52	957.759	999.52	0.849641
1014.61	938.975	1000.78	939.985	1000.78	0.833874
1015.86	940.893	1002.03	962.933	1002.03	0.854231
1017.12	933.631	1003.29	957.397	1003.29	0.84932
1018.38	959.975	1004.55	964.408	1004.55	0.85554
1019.64	947.908	1005.81	959.093	1005.81	0.850825
1020.89	923.626	1007.06	976.895	1007.06	0.866617
1022.15	961.946	1008.32	933.479	1008.32	0.828102
1023.41	959.225	1009.58	972.228	1009.58	0.862477
1024.66	943.879	1010.83	957	1010.83	0.848968
1025.92	937.141	1012.09	966.154	1012.09	0.857089
1027.18	947.361	1013.35	932.836	1013.35	0.827532
1028.44	962.751	1014.61	928.948	1014.61	0.824082
1029.69	954.356	1015.86	950.295	1015.86	0.84302
1030.95	953.293	1017.12	947.549	1017.12	0.840584
1032.21	983.47	1018.38	966.89	1018.38	0.857742
1033.47	987.013	1019.64	940.293	1019.64	0.834147
1034.72	950.844	1020.89	940.97	1020.89	0.834748
1035.98	970.185	1022.15	938.923	1022.15	0.832932
1037.24	965.292	1023.41	962.431	1023.41	0.853786
1038.49	955.305	1024.66	945.969	1024.66	0.839182
1039.75	948.054	1025.92	930.823	1025.92	0.825746
1041.01	940.341	1027.18	978.023	1027.18	0.867618
1042.27	937.187	1028.44	951.793	1028.44	0.844349
1043.52	941.474	1029.69	946.262	1029.69	0.839443
1044.78	972.285	1030.95	974.449	1030.95	0.864448
1046.04	952.402	1032.21	955.89	1032.21	0.847984
1047.3	940.641	1033.47	951.321	1033.47	0.84393
1048.55	940.316	1034.72	981.489	1034.72	0.870692
1049.81	978.657	1035.98	939.664	1035.98	0.833589
1051.07	940.249	1037.24	955.69	1037.24	0.847806
1052.32	970.843	1038.49	974.485	1038.49	0.86448
1053.58	955.861	1039.75	965.944	1039.75	0.856903
1054.84	961.992	1041.01	964.354	1041.01	0.855492
1056.1	952.698	1042.27	938.866	1042.27	0.832881
1057.35	939.333	1043.52	964.559	1043.52	0.855674
1058.61	936.684	1044.78	938.918	1044.78	0.832927
1059.87	963.475	1046.04	947.266	1046.04	0.840333
1061.13	966.731	1047.3	953.774	1047.3	0.846106
1062.38	952.19	1048.55	951.418	1048.55	0.844016
1063.64	937.344	1049.81	946.797	1049.81	0.839917
1064.9	937.589	1051.07	948.32	1051.07	0.841268
1066.15	942.067	1052.32	953.62	1052.32	0.845969
1067.41	945.284	1053.58	933.423	1053.58	0.828053
1068.67	927.37	1054.84	955.808	1054.84	0.847911
1069.93	957.526	1056.1	957.451	1056.1	0.849368
1071.18	949.169	1057.35	967.564	1057.35	0.85834
1072.44	946.762	1058.61	942.039	1058.61	0.835696
1073.7	981.298	1059.87	949.297	1059.87	0.842134
1074.95	952.659	1061.13	938.641	1061.13	0.832682
1076.21	957.759	1062.38	939.559	1062.38	0.833496
1077.47	939.985	1063.64	957.033	1063.64	0.848997
1078.73	962.933	1064.9	947.72	1064.9	0.840735
1079.98	957.397	1066.15	942.264	1066.15	0.835896
1081.24	964.408	1067.41	943.87	1067.41	0.837321
1082.5	959.093	1068.67	952.998	1068.67	0.845418
1083.76	976.895	1069.93	958.92	1069.93	0.850671
1085.01	933.479	1071.18	940.421	1071.18	0.834261
1086.27	972.228	1072.44	949.197	1072.44	0.842046
1087.53	957	1073.7	940.89	1073.7	0.834677
1088.78	966.154	1074.95	971.515	1074.95	0.861844
1090.04	932.836	1076.21	979.826	1076.21	0.869218
1091.3	928.948	1077.47	933.048	1077.47	0.82772
1092.56	950.295	1078.73	955.297	1078.73	0.847457
1093.81	947.549	1079.98	974.851	1079.98	0.864804
1095.07	966.89	1081.24	973.839	1081.24	0.863907
1096.33	940.293	1082.5	965.551	1082.5	0.856554
1097.59	940.97	1083.76	934.743	1083.76	0.829223
1098.84	938.923	1085.01	939.854	1085.01	0.833758
1100.1	962.431	1086.27	968.933	1086.27	0.859554
1101.36	945.969	1087.53	946.215	1087.53	0.8394
1102.61	930.823	1088.78	965.652	1088.78	0.856644
1103.87	978.023	1090.04	943.597	1090.04	0.837078
1105.13	951.793	1091.3	939.51	1091.3	0.833452
1106.39	946.262	1092.56	977.862	1092.56	0.867475
1107.64	974.449	1093.81	964.382	1093.81	0.855517
1108.9	955.89	1095.07	970.144	1095.07	0.860629
1110.16	951.321	1096.33	938.667	1096.33	0.832705
1111.42	981.489	1097.59	951.731	1097.59	0.844294
1112.67	939.664	1098.84	964.252	1098.84	0.855402
1113.93	955.69	1100.1	968.711	1100.1	0.859358
1115.19	974.485	1101.36	965.918	1101.36	0.856879
1116.44	965.944	1102.61	931.51	1102.61	0.826355
1117.7	964.354	1103.87	950.092	1103.87	0.84284
1118.96	938.866	1105.13	953.262	1105.13	0.845652
1120.22	964.559	1106.39	924.951	1106.39	0.820537
1121.47	938.918	1107.64	936.936	1107.64	0.831169
1122.73	947.266	1108.9	972.234	1108.9	0.862483
1123.99	953.774	1110.16	969.602	1110.16	0.860147
1125.25	951.418	1111.42	974.03	1111.42	0.864075
1126.5	946.797	1112.67	958.897	1112.67	0.850651
1127.76	948.32	1113.93	940.623	1113.93	0.83444
1129.02	953.62	1115.19	931.97	1115.19	0.826764
1130.27	933.423	1116.44	953.743	1116.44	0.846078
1131.53	955.808	1117.7	968.43	1117.7	0.859107
1132.79	957.451	1118.96	968.611	1118.96	0.859269
1134.05	967.564	1120.22	961.095	1120.22	0.852601
1135.3	942.039	1121.47	974.744	1121.47	0.864709
1136.56	949.297	1122.73	928.969	1122.73	0.824101
1137.82	938.641	1123.99	951.279	1123.99	0.843893
1139.08	939.559	1125.25	928.603	1125.25	0.823777
1140.33	957.033	1126.5	955.051	1126.5	0.847239
1141.59	947.72	1127.76	937.08	1127.76	0.831297
1142.85	942.264	1129.02	952.005	1129.02	0.844537
1144.1	943.87	1130.27	960.466	1130.27	0.852042
1145.36	952.998	1131.53	943.089	1131.53	0.836627
1146.62	958.92	1132.79	967.121	1132.79	0.857947
1147.88	940.421	1134.05	976.164	1134.05	0.865969
1149.13	949.197	1135.3	958.389	1135.3	0.8502
1150.39	940.89	1136.56	971.064	1136.56	0.861444
1151.65	971.515	1137.82	970.346	1137.82	0.860807
1152.9	979.826	1139.08	935.848	1139.08	0.830203
1154.16	933.048	1140.33	951.403	1140.33	0.844003
1155.42	955.297	1141.59	973.069	1141.59	0.863223
1156.68	974.851	1142.85	980.774	1142.85	0.870058
1157.93	973.839	1144.1	919.244	1144.1	0.815474
1159.19	965.551	1145.36	929.716	1145.36	0.824764
1160.45	934.743	1146.62	943.359	1146.62	0.836867
1161.71	939.854	1147.88	926.118	1147.88	0.821572
1162.96	968.933	1149.13	977.139	1149.13	0.866834
1164.22	946.215	1150.39	937.73	1150.39	0.831873
1165.48	965.652	1151.65	944.577	1151.65	0.837948
1166.73	943.597	1152.9	958.941	1152.9	0.85069
1167.99	939.51	1154.16	955.033	1154.16	0.847223
1169.25	977.862	1155.42	957.675	1155.42	0.849567
1170.51	964.382	1156.68	939.616	1156.68	0.833547
1171.76	970.144	1157.93	958.213	1157.93	0.850044
1173.02	938.667	1159.19	983.452	1159.19	0.872434
1174.28	951.731	1160.45	975.552	1160.45	0.865426
1175.54	964.252	1161.71	936.898	1161.71	0.831136
1176.79	968.711	1162.96	977.787	1162.96	0.867408
1178.05	965.918	1164.22	938.407	1164.22	0.832474
1179.31	931.51	1165.48	940.831	1165.48	0.834624
1180.56	950.092	1166.73	956.557	1166.73	0.848575
1181.82	953.262	1167.99	944.738	1167.99	0.83809
1183.08	924.951	1169.25	962.744	1169.25	0.854064
1184.34	936.936	1170.51	957.236	1170.51	0.849178
1185.59	972.234	1171.76	944.556	1171.76	0.837929
1186.85	969.602	1173.02	960.162	1173.02	0.851773
1188.11	974.03	1174.28	952.803	1174.28	0.845245
1189.37	958.897	1175.54	952.648	1175.54	0.845107
1190.62	940.623	1176.79	958.056	1176.79	0.849905
1191.88	931.97	1178.05	945.467	1178.05	0.838737
1193.14	953.743	1179.31		1179.31	0
1194.39	968.43	1180.56		1180.56	0
1195.65	968.611	1181.82		1181.82	0
1196.91	961.095	1183.08		1183.08	0
1198.17	974.744	1184.34		1184.34	0
1199.42	928.969	1185.59		1185.59	0
1200.68	951.279	1186.85		1186.85	0
1201.94	928.603	1188.11		1188.11	0
1203.2	955.051	1189.37		1189.37	0
1204.45	937.08	1190.62		1190.62	0
1205.71	952.005	1191.88		1191.88	0
1206.97	960.466	1193.14		1193.14	0
1208.22	943.089	1194.39		1194.39	0
1209.48	967.121	1195.65		1195.65	0
1210.74	976.164	1196.91		1196.91	0
1212	958.389	1198.17		1198.17	0
1213.25	971.064	1199.42		1199.42	0
1214.51	970.346	1200.68		1200.68	0
1215.77	935.848	1201.94		1201.94	0
1217.03	951.403	1203.2		1203.2	0
1218.28	973.069	1204.45		1204.45	0
1219.54	980.774	1205.71		1205.71	0
1220.8	919.244	1206.97		1206.97	0
1222.05	929.716	1208.22		1208.22	0
1223.31	943.359	1209.48		1209.48	0
1224.57	926.118	1210.74		1210.74	0
1225.83	977.139	1212		1212	0
1227.08	937.73	1213.25		1213.25	0
1228.34	944.577	1214.51		1214.51	0
1229.6	958.941	1215.77		1215.77	0
1230.85	955.033	1217.03		1217.03	0
1232.11	957.675	1218.28		1218.28	0
1233.37	939.616	1219.54		1219.54	0
1234.63	958.213	1220.8		1220.8	0
1235.88	983.452	1222.05		1222.05	0
1237.14	975.552	1223.31		1223.31	0
1238.4	936.898	1224.57		1224.57	0
1239.66	977.787	1225.83		1225.83	0
1240.91	938.407	1227.08		1227.08	0
1242.17	940.831	1228.34		1228.34	0
1243.43	956.557	1229.6		1229.6	0
1244.68	944.738	1230.85		1230.85	0
1245.94	962.744	1232.11		1232.11	0
1247.2	957.236	1233.37		1233.37	0
1248.46	944.556	1234.63		1234.63	0
1249.71	960.162	1235.88		1235.88	0
1250.97	952.803	1237.14		1237.14	0
1252.23	952.648	1238.4		1238.4	0
1253.49	958.056	1239.66		1239.66	0
1254.74	945.467	1240.91		1240.91	0
1256		1242.17		1242.17	0

## Sheet: Figure 2D
Length (um)	averaged Fl. Intensity (A.U.)	averaged Fl. Intensity Normalized (To fit the data)
0	1864.5	0.931412
0.207	2001.8	1
0.414	1894.6	0.946448
0.621	1811.6	0.904986
0.828	1684.4	0.841443
1.035	1803	0.900689
1.242	1608.3	0.803427
1.449	1631.1	0.814817
1.656	1537.9	0.768259
1.863	1266.4	0.632631
2.07	1234.9	0.616895
2.277	1007	0.503047
2.484	931.94	0.465551
2.691	647.67	0.323544
2.898	431.06	0.215336
3.105	259.72	0.129743
3.312	180.44	0.0901389
3.519	111.14	0.05552
3.726	109.69	0.0547957
3.933	97.25	0.0485813
4.14	109.44	0.0546708
4.347	240.11	0.119947
4.554	500.56	0.250055
4.761	558.58	0.279039
4.968	866.67	0.432945
5.175	1109.7	0.554351
5.382	1265	0.631931
5.589	1381.8	0.690279
5.796	1668.2	0.83335
6.003	1534.3	0.76646
6.21	1562.3	0.780448
6.417	1680.4	0.839444
6.624	1736.1	0.867269
6.831	1786.5	0.892447
7.038	1765.9	0.882156
7.245	1929.4	0.963833

## Sheet: Figure 2E
Protein Name	Calculated Dconfocal	Standard Error
Protein	Dconfocal	Standard Error ( calculated)	percentage error ( Dconfocal)	Percenatge recovery (%)	Statdard Error	percentage error
NfuA	24.8	1.1	4.43548	86.4	1.72	1.99074
NadK	29.8	1.4	4.69799	86.2	1.64	1.90255
FabG	30.3	1.4	4.62046	86.7	1.82	2.09919
SodA	25.5	1.2	4.70588	88.6	1.8	2.0316
tpiA	27.9	1.7	6.09319	87.2	1.76	2.01835
GpmA	21.7	1	4.60829	87.5	1.65	1.88571
Can	18.7	1.4	7.48663	84.2	1.73	2.05463
Upp	23	1.1	4.78261	84.3	1.68	1.99288
SpeB	30.4	1.4	4.60526	88.4	1.85	2.09276
IspD	24.1	1.2	4.97925	88.1	1.79	2.03178
Acul	28	1.3	4.64286	88	1.65	1.875
ThiD	28.7	1.3	4.52962	87.3	1.7	1.94731
PyrF	26	1.2	4.61538	85.6	1.67	1.95093
NadE	23.2	1.1	4.74138	85.6	1.79	2.09112
Crp	30.1	1.3	4.31894	90.4	1.786	1.97566
BSA	29.6	1.4	4.72973	86.3	1.72	1.99305
