# Supplementary material for: Reversing protonation of weakly basic drugs greatly enhances intracellular diffusion and decreases lysosomal sequestration
Source: eLife. 2024 Dec 6;13:RP97255. doi: 10.7554/eLife.97255 (PMC11623935; doi:10.7554/eLife.97255)
Supplement: Figure 3—figure supplement 1—source data 1. [file elife-97255-fig3-figsupp1-data1.xlsx]

## Sheet: F3-FS1-C
Time axis (re-adjusted)	Pre-Bleach	Cytoplasm (Instant)	Nucleus (Instant)	Cytoplasm (24hr)	Nucleus(24hr)
-13.261	1
-11.788	0.97303						Fluorescien instant vs incubations
10.314	0.97311
-8.8408	0.96672
-7.3674	0.98315
-5.8939	0.98206
-4.4204	0.98772
-2.9469	0.98453
-1.4735	0.98658
0		0.22062	0.27885	0.13514	0.17544
1.4735		0.2758	0.30874	0.1867	0.22488
2.9469		0.30041	0.35438	0.21644	0.2732
4.4204		0.34012	0.37155	0.23696	0.33782
5.8939		0.34675	0.41953	0.26649	0.33303
7.3674		0.38075	0.46055	0.30915	0.32755
8.8408		0.40299	0.49612	0.31092	0.37994
10.314		0.40987	0.50823	0.31887	0.39829
11.788		0.44348	0.49702	0.33324	0.41133
13.261		0.44499	0.53026	0.35611	0.43457
14.735		0.45431	0.54094	0.38567	0.40991
16.208		0.49491	0.54868	0.36435	0.43996
17.682		0.49694	0.57678	0.40014	0.4478
19.155		0.50464	0.5927	0.38857	0.47798
20.629		0.50705	0.59385	0.40366	0.46722
22.102		0.53065	0.59246	0.40976	0.47663
23.576		0.53605	0.62561	0.41319	0.46706
25.049		0.54603	0.62722	0.42924	0.52534
26.523		0.58415	0.65165	0.42607	0.49009
27.996		0.55519	0.63925	0.45914	0.49533
29.469		0.57193	0.66104	0.45776	0.4947
30.943		0.59113	0.65427	0.47823	0.51783
32.416		0.57692	0.66462	0.43367	0.52922
33.89		0.60326	0.67047	0.4712	0.56476
35.363		0.60645	0.66815	0.44814	0.54777
36.837		0.60838	0.70903	0.46585	0.57644
38.31		0.62315	0.69857	0.47994	0.54791
39.784		0.60706	0.69657	0.45768	0.58469
41.257		0.61147	0.71429	0.46935	0.57593
42.731		0.62566	0.72727	0.45741	0.58811
44.204		0.6419	0.71366	0.48122	0.56726
45.678		0.63361	0.7336	0.4988	0.59231
47.151		0.64584	0.72536	0.48509	0.58548
48.625		0.66404	0.75548	0.51864	0.58188
50.098		0.65844	0.74316	0.52412	0.60785
51.572		0.66483	0.74793	0.53708	0.60115
53.045		0.66105	0.74851	0.51988	0.60917
54.519		0.65572	0.761	0.50222	0.61038
55.992		0.65635	0.75323	0.51954	0.59237
57.465		0.69	0.77498	0.50686	0.60796
58.939		0.66986	0.75207	0.51105	0.62591
60.412		0.68973	0.77497	0.51352	0.61564
61.886		0.69878	0.80497	0.5127	0.61673
63.359		0.67891	0.76515	0.54436	0.63096
64.833		0.68564	0.77479	0.51704	0.66137
66.306		0.69748	0.79596	0.49441	0.63046
67.78		0.70048	0.80874	0.5391	0.65609
69.253		0.72004	0.79661	0.53525	0.65367
70.727		0.6971	0.80864	0.52892	0.60461
72.2		0.71909	0.79582	0.55963	0.65585
73.674		0.71166	0.81334	0.55914	0.65704
75.147		0.7204	0.77921	0.55896	0.65314
76.621		0.69396	0.82449	0.55049	0.65029
78.094		0.73092	0.79858	0.53801	0.68077
79.568		0.72732	0.81696	0.57579	0.64608
81.041		0.70045	0.80608	0.53897	0.66259
82.515		0.72402	0.80654	0.56455	0.65015
83.988		0.71688	0.85248	0.54668	0.66091
85.461		0.73117	0.82058	0.56837	0.68659
86.935		0.74445	0.82788	0.55988	0.67386
88.408		0.74816	0.81536	0.54239	0.65153
89.882		0.74452	0.83581	0.57376	0.69275
91.355		0.73186	0.81315	0.58987	0.65288
92.829		0.74344	0.83465	0.56983	0.67761
94.302		0.73148	0.82984	0.52776	0.68831
95.776		0.72316	0.84993	0.57203	0.69689
97.249		0.74165	0.83804	0.58757	0.69015
98.723		0.76141	0.87033	0.57031	0.66894
100.2		0.74854	0.83761	0.57338	0.68718
101.67		0.72782	0.8756	0.55554	0.67699
103.14		0.75066	0.83608	0.60193	0.70791
104.62		0.73292	0.83098	0.56753	0.68949
106.09		0.76402	0.83037	0.59192	0.66417
107.56		0.76684	0.8373	0.60156	0.67251
109.04		0.7581	0.84994	0.58739	0.69632
110.51		0.75778	0.84633	0.58463	0.70685
111.98		0.76579	0.86049	0.56013	0.70396
113.46		0.78195	0.86437	0.58093	0.67729
114.93		0.77256	0.85738	0.59131	0.70587
116.4		0.77231	0.82698	0.59296	0.70214
117.88		0.78507	0.83875	0.58768	0.71423
119.35		0.75593	0.84692	0.56683	0.74298
120.82		0.78852	0.86799	0.58428	0.70945
122.3		0.77323	0.86173	0.59341	0.71992
123.77		0.78408	0.87386	0.60486	0.71596
125.25		0.77227	0.8398	0.59153	0.74313
126.72		0.78174	0.87488	0.59826	0.72313
128.19		0.79341	0.86903	0.56832	0.70779
129.67		0.77438	0.86893	0.56556	0.72661
131.14		0.77512	0.86411	0.60162	0.72147
132.61		0.79696	0.87367	0.6252	0.69779
134.09		0.75274	0.84649	0.6319	0.70766
135.56		0.7853	0.87113	0.61196	0.68681
137.03		0.78476	0.86797	0.62101	0.71197
138.51		0.79688	0.86059	0.60324	0.71277
139.98		0.79172	0.87225	0.59694	0.69386
141.45		0.77007	0.87144	0.62595	0.7087
142.93		0.76604	0.87048	0.63482	0.72549
144.4		0.79867	0.86921	0.57281	0.71263
145.87		0.77715	0.88359	0.59677	0.73651
147.35		0.78968	0.8814	0.60106	0.75114
148.82		0.80431	0.87278	0.60629	0.73928
150.29		0.79143	0.8806	0.59006	0.72891
151.77		0.81741	0.88709	0.59477	0.70458
153.24		0.78612	0.87649	0.60564	0.73977
154.71		0.79662	0.88941	0.60981	0.74374
156.19		0.80383	0.87293	0.61821	0.73396
157.66		0.81306	0.89368	0.59082	0.73339
159.14		0.78176	0.88903	0.57013	0.69995
160.61		0.80728	0.8973	0.61281	0.72034
162.08		0.80465	0.88168	0.63373	0.76532
163.56		0.81113	0.88669	0.60416	0.73496
165.03		0.82494	0.8912	0.6359	0.74244
166.5		0.80168	0.88602	0.62434	0.73384
167.98		0.79177	0.88498	0.61382	0.72609
169.45		0.80299	0.8935	0.60385	0.75476
170.92		0.80774	0.90169	0.61518	0.71296
172.4		0.79701	0.89055	0.6348	0.73663
173.87		0.80629	0.87827	0.58625	0.73506
175.34		0.81211	0.88461	0.60073	0.74135
176.82		0.79407	0.88724	0.60677	0.75363
178.29		0.80264	0.90114	0.61761	0.74243
179.76		0.79105	0.89403	0.62813	0.74025
181.24		0.81032	0.89491	0.62243	0.74675
182.71		0.8221	0.90203	0.61436	0.7349
184.18		0.78528	0.88008	0.6143	0.7649
185.66		0.78633	0.91529	0.61996	0.72212
187.13		0.82573	0.89518	0.60014	0.73611
188.6		0.8193	0.86729	0.62789	0.74934
190.08		0.83683	0.8812	0.63743	0.74698
191.55		0.81318	0.89459	0.60969	0.77001
193.03		0.81166	0.90856	0.60346	0.75613
194.5		0.81164	0.89695	0.62241	0.73406
195.97		0.80087	0.9137	0.6306	0.77013
197.45		0.8228	0.91694	0.61086	0.75641
198.92		0.82238	0.90133	0.61136	0.7488
200.39		0.84797	0.90734	0.62657	0.77042
201.87		0.82789	0.90808	0.63385	0.74031
203.34		0.81149	0.91641	0.64064	0.7351
204.81		0.82107	0.91587	0.63541	0.68414
206.29		0.84182	0.90504	0.61954	0.71726
207.76		0.8227	0.89916	0.62806	0.77441
209.23		0.80664	0.89277	0.61989	0.72153
210.71		0.82777	0.88879	0.63606	0.71422
212.18		0.83524	0.89482	0.6331	0.74425
213.65		0.82137	0.92642	0.62723	0.7126
215.13		0.8203	0.89419	0.61232	0.77277
216.6		0.82985	0.91152	0.64204	0.74257
218.07		0.8243	0.90617	0.61587	0.73937
219.55		0.82197	0.91091	0.64402	0.77631
221.02		0.81436	0.90949	0.61691	0.73098
222.49		0.82561	0.91301	0.63796	0.75118
223.97		0.83097	0.92337	0.62755	0.78419
225.44		0.82256	0.93732	0.60947	0.75395
226.91		0.83982	0.91145	0.62894	0.73179
228.39		0.84573	0.91204	0.62654	0.75894
229.86		0.83134	0.91131	0.6417	0.74172
231.34		0.83583	0.91195	0.61576	0.73579
232.81		0.81331	0.92141	0.64328	0.75055
234.28		0.84245	0.92855	0.61654	0.72838
235.76		0.83469	0.91635	0.62378	0.73816
237.23		0.83257	0.91525	0.65004	0.74776
238.7		0.82346	0.93192	0.62287	0.77482
240.18		0.84276	0.89778	0.64194	0.74872
241.65		0.85826	0.90683	0.61783	0.77429
243.12		0.84961	0.93643	0.63022	0.73304
244.6		0.84881	0.91989	0.60155	0.76889
246.07		0.81104	0.91602	0.63228	0.78484
247.54		0.82107	0.90718	0.61781	0.76709
249.02		0.84061	0.92524	0.62372	0.75253
250.49		0.82675	0.9095	0.62667	0.74325
251.96		0.83156	0.90988	0.66114	0.79054
253.44		0.83238	0.90665	0.61231	0.70527
254.91		0.83294	0.91104	0.61346	0.74256
256.38		0.83383	0.90784	0.64647	0.7727
257.86		0.83084	0.94129	0.64032	0.76736
259.33		0.85092	0.90153	0.62008	0.74693
260.8		0.85271	0.92722	0.64207	0.73674
262.28		0.83884	0.9254	0.65162	0.76637
263.75		0.83847	0.92197	0.60682	0.76917
265.23		0.83851	0.92386	0.64032	0.74038
266.7		0.86072	0.91999	0.66399	0.74635
268.17		0.85648	0.9324	0.63267	0.73502
269.65		0.83034	0.91439	0.65532	0.7596
271.12		0.83519	0.93838	0.63731	0.73788
272.59		0.83534	0.91224	0.63861	0.73823
274.07		0.85407	0.91608	0.60881	0.76835
275.54		0.84643	0.92382	0.62163	0.73407
277.01		0.85811	0.92772	0.64206	0.79401
278.49		0.84376	0.94033	0.62185	0.75937
279.96		0.86866	0.92042	0.62596	0.77671
281.43		0.83814	0.92191	0.62962	0.78576
282.91		0.85543	0.94947	0.62698	0.769
284.38		0.85395	0.91928	0.60796	0.74822
285.85		0.84517	0.91038	0.61605	0.78439
287.33		0.84818	0.93053	0.64418	0.75737
288.8		0.82633	0.91595	0.62942	0.76715
290.27		0.83521	0.9225	0.61423	0.7535
291.75		0.8258	0.92029	0.63954	0.76913
293.22		0.8355	0.94528	0.62894	0.7267
294.69		0.86337	0.93821	0.62918	0.75908
296.17		0.84988	0.92506	0.63691	0.74578
297.64		0.86153	0.92829	0.65004	0.78731
299.12		0.86369	0.93382	0.63806	0.78088
300.59		0.81794	0.92185	0.6484	0.7649
302.06		0.85672	0.91801	0.62737	0.72786
303.54		0.8353	0.92851	0.61236	0.77909
305.01		0.82517	0.94063	0.63333	0.77077
306.48		0.8537	0.93275	0.64996	0.78587
307.96		0.84704	0.93424	0.6461	0.77073
309.43		0.84002	0.92956	0.65566	0.76036
310.9		0.84408	0.93482	0.64546	0.74815
312.38		0.84403	0.94356	0.65207	0.75789
313.85		0.8331	0.92166	0.62878	0.79125
315.32		0.85623	0.92364	0.63391	0.7447
316.8		0.85254	0.91508	0.62642	0.79462
318.27		0.84335	0.92916	0.64413	0.78704
319.74		0.86142	0.9604	0.65204	0.76665
321.22		0.84701	0.92648	0.62744	0.76966
322.69		0.852	0.93727	0.6456	0.7433
324.16		0.86363	0.94697	0.63939	0.74445
325.64		0.84502	0.93488	0.62186	0.74807
327.11		0.85754	0.93453	0.64887	0.79364
328.58		0.85472	0.93921	0.63131	0.78131
330.06		0.86643	0.94776	0.63715	0.74181
331.53		0.84583	0.92421	0.64423	0.77641
333.01		0.86576	0.92894	0.60902	0.75835
334.48		0.86248	0.93862	0.65887	0.77986
335.95		0.84689	0.93784	0.63704	0.73735
337.43		0.84972	0.90652	0.6664	0.77868
338.9		0.85884	0.9128	0.62434	0.75912
340.37		0.8648	0.91707	0.64168	0.79224
341.85		0.85237	0.96358	0.62652	0.77825
343.32		0.84282	0.93719	0.62808	0.78275
344.79		0.87148	0.91278	0.61844	0.77529
346.27		0.85467	0.94938	0.65337	0.79737
347.74		0.85615	0.9273	0.65037	0.76463
349.21		0.86131	0.93647	0.62473	0.76833
350.69		0.86352	0.93558	0.64737	0.74364
352.16		0.88519	0.95487	0.67775	0.74177
353.63		0.84869	0.93539	0.62708	0.73288
355.11		0.86888	0.91913	0.63643	0.75552
356.58		0.83899	0.95066	0.63607	0.77438
358.05		0.85274	0.94654	0.65041	0.79209
359.53		0.84184	0.91462	0.66242	0.77435
361		0.85604	0.94988	0.64843	0.79037
362.47		0.83751	0.92643	0.64653	0.74139
363.95		0.85042	0.92746	0.62738	0.72042
365.42		0.85982	0.93244	0.63923	0.79313
366.89		0.86547	0.91894	0.62887	0.78451
368.37		0.87175	0.96268	0.64274	0.7758
369.84		0.85642	0.9236	0.63636	0.78543
371.32		0.88124	0.94604	0.65322	0.74891
372.79		0.86085	0.9457	0.64283	0.74885
374.26		0.85623	0.95056	0.61564	0.80447
375.74		0.86704	0.94752	0.64159	0.77521
377.21		0.86245	0.93062	0.6498	0.79845
378.68		0.85164	0.93017	0.671	0.80574
380.16		0.85675	0.93156	0.6113	0.77594
381.63		0.88771	0.93191	0.65517	0.76262
383.1		0.87856	0.93835	0.65795	0.74865
384.58		0.87231	0.92601	0.62906	0.7555
386.05		0.85432	0.93317	0.65482	0.7459
387.52		0.87184	0.93764	0.6355	0.78543
389		0.86148	0.95809	0.6337	0.73915
390.47		0.84852	0.95767	0.63623	0.78611
391.94		0.87235	0.94168	0.65244	0.73251
393.42		0.88314	0.94474	0.63204	0.74918
394.89		0.85874	0.94892	0.63018	0.80621
396.36		0.86468	0.92303	0.63888	0.74961
397.84		0.8662	0.93139	0.61966	0.76007
399.31		0.84769	0.93457	0.65602	0.75459
400.78		0.86014	0.93253	0.64919	0.7569
402.26		0.85083	0.95914	0.65027	0.74327
403.73		0.85092	0.94461	0.62827	0.76407
405.21		0.86368	0.9288	0.64916	0.78029
406.68		0.86432	0.94555	0.63953	0.77368
408.15		0.87449	0.92801	0.61563	0.78207
409.63		0.86128	0.9304	0.64494	0.77513
411.1		0.86279	0.94591	0.63546	0.76478
412.57		0.84561	0.94422	0.65619	0.78578
414.05		0.84855	0.93314	0.65754	0.76189
415.52		0.86782	0.94138	0.65202	0.78237
416.99		0.87016	0.94349	0.62993	0.77047
418.47		0.88137	0.94927	0.62965	0.75344
419.94		0.87405	0.9356	0.62604	0.77701
421.41		0.87039	0.95286	0.67793	0.77759
422.89		0.84393	0.93528	0.67215	0.80125
424.36		0.85933	0.95578	0.62862	0.77637
425.83		0.85338	0.95039	0.63041	0.76006
427.31		0.86875	0.94238	0.64727	0.76326
428.78		0.85718	0.96699	0.66541	0.75303
430.25		0.87523	0.93852	0.63023	0.76737
431.73		0.8504	0.95065	0.65607	0.77344
433.2		0.8983	0.94554	0.61055	0.76851
434.67		0.85899	0.95716	0.6498	0.77036
436.15		0.86453	0.93678	0.627	0.78767
437.62		0.8781	0.9448	0.64205	0.78127
439.1		0.86135	0.94532	0.61091	0.77002
440.57		0.84781	0.95087	0.64101	0.8209
442.04		0.84806	0.96014	0.63538	0.82244
443.52		0.86445	0.943	0.62703	0.79101
444.99		0.86475	0.9344	0.65576	0.75334
446.46		0.85004	0.95091	0.64668	0.78219
447.94		0.86525	0.94108	0.61821	0.7917
449.41		0.85093	0.94635	0.64866	0.80579
450.88		0.85554	0.94381	0.65157	0.76719
452.36		0.87096	0.9626	0.65009	0.79616
453.83		0.86636	0.94224	0.63642	0.75734
455.3		0.85425	0.9435	0.63486	0.78857
456.78		0.87664	0.94676	0.62508	0.79148
458.25		0.88899	0.9299	0.62005	0.76301
459.72		0.85582	0.94082	0.63893	0.75469
461.2		0.85023	0.94767	0.65719	0.77149
462.67		0.86106	0.95292	0.6245	0.77335
464.14		0.86131	0.92113	0.66366	0.771
465.62		0.86782	0.96598	0.65388	0.77284
467.09		0.86275	0.94475	0.61926	0.77589
468.56		0.87138	0.95539	0.64645	0.7921
470.04		0.85657	0.95708	0.63588	0.74188
471.51		0.85142	0.98095	0.62764	0.77834
472.98		0.88257	0.93413	0.65588	0.78322
474.46		0.88212	0.94896	0.63545	0.80299
475.93		0.85907	0.94675	0.65339	0.78501
477.41		0.87147	0.96139	0.65536	0.7899
478.88		0.86312	0.94757	0.66649	0.77207
480.35		0.86281	0.95806	0.65852	0.78356
481.83		0.86395	0.95183	0.6399	0.80396
483.3		0.85313	0.91444	0.63497	0.77437
484.77		0.87685	0.94945	0.63694	0.77636
486.25		0.86749	0.94917	0.60771	0.7869
487.72		0.86408	0.96281	0.64415	0.78535
489.19		0.8417	0.94613	0.63919	0.77977
490.67		0.87733	0.95308	0.64257	0.79445
492.14		0.86643	0.94921	0.61706	0.75371
493.61		0.8813	0.93422	0.66389	0.80435
495.09		0.89476	0.9379	0.63762	0.77794
496.56		0.8943	0.92588	0.66211	0.7645
498.03		0.85381	0.95196	0.65617	0.73319
499.51		0.86871	0.94681	0.64149	0.76854
500.98		0.88922	0.96178	0.64347	0.76159
502.45		0.85578	0.95883	0.64856	0.73623
503.93		0.87856	0.95065	0.64993	0.76625
505.4		0.86991	0.95371	0.66294	0.81806
506.87		0.87287	0.94803	0.60924	0.72229
508.35		0.88249	0.93542	0.61636	0.77111
509.82		0.87747	0.92358	0.65831	0.78015
511.3		0.84081	0.9584	0.63615	0.78127
512.77		0.85666	0.94975	0.63216	0.7887
514.24		0.88085	0.94294	0.65666	0.76468
515.72		0.86525	0.94682	0.64508	0.78508
517.19		0.88401	0.96793	0.63674	0.79371
518.66		0.85485	0.94894	0.64143	0.77645
520.14		0.87062	0.96303	0.65113	0.80012
521.61		0.87627	0.96582	0.66095	0.78981
523.08		0.86693	0.93795	0.65316	0.75158
524.56		0.8651	0.95039	0.63861	0.74471
526.03		0.86461	0.9494	0.65426	0.76481
527.5		0.86125	0.9594	0.62344	0.76067
528.98		0.89541	0.94387	0.64856	0.77944
530.45		0.88539	0.94969	0.61187	0.75602
531.92		0.85594	0.93299	0.66233	0.79025
533.4		0.86537	0.92333	0.63747	0.75867
534.87		0.87412	0.95747	0.64702	0.75678
536.34		0.86813	0.96381	0.64938	0.79439
537.82		0.86294	0.94661	0.65084	0.79354
539.29		0.86255	0.96381	0.65506	0.81334
540.76		0.86295	0.96995	0.66643	0.72722
542.24		0.89325	0.96016	0.66428	0.7845
543.71		0.87037	0.9598	0.62588	0.78566
545.19		0.86518	0.95991	0.63597	0.76481
546.66		0.86234	0.96113	0.65524	0.78641
548.13		0.86947	0.95638	0.64966	0.75553
549.61		0.88046	0.9605	0.62803	0.73721
551.08		0.88668	0.95755	0.64978	0.78573
552.55		0.86051	0.94248	0.63919	0.79352
554.03		0.89665	0.94346	0.62147	0.78047
555.5		0.87152	0.94575	0.6359	0.77014
556.97		0.86374	0.97801	0.64804	0.77156
558.45		0.86862	0.97719	0.63222	0.79971
559.92		0.87887	0.95329	0.64696	0.75667
561.39		0.88014	0.97187	0.653	0.80704
562.87		0.88387	0.95556	0.63349	0.79125
564.34		0.86621	0.92893	0.63602	0.76599
565.81		0.87138	0.95127	0.62872	0.78512
567.29		0.8643	0.95471	0.62281	0.78246
568.76		0.86904	0.95369	0.63178	0.76577
570.23		0.8855	0.93878	0.64873	0.77922
571.71		0.86133	0.95328	0.64917	0.76026
573.18		0.87971	0.95683	0.66176	0.76104
574.65		0.8739	0.95757	0.64398	0.75279
576.13		0.87986	0.94829	0.60577	0.77242
577.6		0.88437	0.97298	0.64286	0.74851
579.08		0.87548	0.94686	0.65648	0.79485
580.55		0.89076	0.95899	0.64591	0.7842
582.02		0.89076	0.97858	0.60802	0.77642
583.5		0.86589	0.96096	0.65593	0.77657
584.97		0.8658	0.96486	0.65456	0.75609
586.44		0.87981	0.94874	0.64878	0.7461
587.92		0.87031	0.96627	0.61208	0.79013
589.39		0.85205	0.96455	0.64096	0.78885
590.86		0.88627	0.95424	0.6211	0.77944
592.34		0.8733	0.94856	0.67724	0.77964
593.81		0.86668	0.95673	0.63828	0.78303
595.28		0.88216	0.94629	0.63344	0.79933
596.76		0.8769	0.94601	0.63215	0.79156
598.23		0.87602	0.95779	0.6473	0.7754
599.7		0.88448	0.9553	0.63179	0.78669
601.18		0.86402	0.94897	0.61846	0.77166
602.65		0.88181	0.9599	0.6463	0.80716
604.12		0.89104	0.96865	0.67274	0.78257
605.6		0.87003	0.94071	0.65399	0.7926
607.07		0.87829	0.96738	0.66566	0.80519
608.54		0.86966	0.96637	0.67857	0.7819
610.02		0.88233	0.94094	0.62721	0.76722
611.49		0.88507	0.95608	0.62071	0.75113
612.96		0.86947	0.9578	0.65425	0.78175
614.44		0.89589	0.9635	0.64687	0.77587
615.91		0.87348	0.96819	0.6393	0.76386
617.39		0.87152	0.93234	0.62102	0.77926
618.86		0.86479	0.96148	0.63437	0.7455
620.33		0.87884	0.95409	0.65357	0.77506
621.81		0.8762	0.95684	0.63331	0.76622
623.28		0.87398	0.95082	0.63044	0.79656
624.75		0.89155	0.9416	0.63366	0.7793
626.23		0.84642	0.94688	0.66668	0.78733
627.7		0.89038	0.9633	0.65833	0.76269
629.17		0.85958	0.95145	0.64849	0.75953
630.65		0.88452	0.93139	0.66039	0.78799
632.12		0.8886	0.9578	0.62724	0.79153
633.59		0.87429	0.95625	0.62892	0.79621
635.07		0.89607	0.95178	0.65806	0.76962
636.54		0.86263	0.94966	0.65849	0.77217
638.01		0.86688	0.95706	0.64137	0.77847
639.49		0.88321	0.95598	0.64201	0.77991
640.96		0.8694	0.93691	0.64531	0.76673
642.43		0.87371	0.94657	0.6447	0.7734
643.91		0.8909	0.95818	0.63401	0.76336
645.38		0.89346	0.96927	0.62149	0.77663
646.85		0.8842	0.96956	0.64108	0.82127
648.33		0.86924	0.97687	0.63433	0.80017
649.8		0.88077	0.93809	0.65156	0.75656
651.28		0.8819	0.95294	0.65112	0.80589
652.75		0.86665	0.96367	0.68159	0.80858
654.22		0.87417	0.9551	0.64241	0.79913
655.7		0.89134	0.95415	0.64975	0.78854
657.17		0.89425	0.93732	0.63967	0.76958
658.64		0.89692	0.95971	0.63371	0.76413
660.12		0.87094	0.94893	0.62772	0.80719
661.59		0.89643	0.94881	0.64534	0.76221
663.06		0.88121	0.97514	0.64913	0.74562
664.54		0.87257	0.96256	0.65556	0.74146
666.01		0.87306	0.94508	0.63597	0.79162
667.48		0.8763	0.94892	0.61424	0.78661
668.96		0.88469	0.95863	0.67762	0.74228
670.43		0.88233	0.95553	0.64895	0.76226
671.9		0.87661	0.96756	0.63485	0.79192
673.38		0.88999	0.9421	0.63062	0.7853
674.85		0.88001	0.95541	0.65159	0.7805
676.32		0.88233	0.92706	0.63146	0.75483
677.8		0.89206	0.94959	0.64406	0.78794
679.27		0.89898	0.96708	0.62623	0.75567
680.74		0.88023	0.91426	0.64452	0.7686
682.22		0.87889	0.97363	0.63327	0.7853
683.69		0.8669	0.95143	0.6341	0.79701
685.17		0.89098	0.95743	0.63064	0.78717
686.64		0.87476	0.9685	0.63391	0.79036
688.11		0.87299	0.95699	0.67091	0.77453
689.59		0.88594	0.9717	0.64469	0.81099
691.06		0.88159	0.96864	0.6361	0.78662
692.53		0.88773	0.93632	0.63503	0.79148
694.01		0.88883	0.96486	0.65897	0.76805
695.48		0.87572	0.96015	0.62815	0.7829
696.95		0.87456	0.94812	0.63814	0.76811
698.43		0.86552	0.93589	0.61396	0.7809
699.9		0.86233	0.98421	0.63857	0.82786
701.37		0.86442	0.94827	0.63014	0.78671
702.85		0.88226	0.93539	0.62983	0.84144
704.32		0.87958	0.94919	0.64188	0.76915
705.79		0.85208	0.97005	0.65512	0.78207
707.27		0.88117	0.93596	0.67123	0.79262
708.74		0.8887	0.97158	0.62738	0.79638
710.21		0.89088	0.96517	0.64204	0.7843
711.69		0.88092	0.94628	0.64194	0.79968
713.16		0.87533	0.93539	0.65385	0.76316
714.63		0.87877	0.9672	0.63664	0.78499
716.11		0.86673	0.95825	0.64252	0.79394
717.58		0.89808	0.98168	0.65619	0.76624
719.06		0.86574	0.94447	0.64966	0.78235
720.53		0.88083	0.94234	0.64098	0.76919
722		0.87469	0.97352	0.64894	0.75148
723.48		0.87871	0.93552	0.6744	0.77569
724.95		0.8749	0.9598	0.64894	0.74634
726.42		0.87609	0.96428	0.66191	0.7806
727.9		0.87146	0.95464	0.6445	0.80261
729.37		0.88549	0.97512	0.65694	0.76191
730.84		0.88402	0.93625	0.64493	0.77924
732.32		0.86987	0.966	0.65493	0.78069
733.79		0.87996	0.97484	0.6285	0.78706
735.26		0.89031	0.9544	0.66152	0.76853
736.74		0.90186	0.96349	0.65519	0.81162
738.21		0.88489	0.95006	0.64143	0.78588
739.68		0.89707	0.96588	0.64146	0.73548
741.16		0.8836	0.96639	0.62356	0.79133
742.63		0.8969	0.94285	0.65467	0.76635
744.1		0.88568	0.95474	0.63407	0.76186
745.58		0.88524	0.96947	0.61733	0.75028
747.05		0.88222	0.96355	0.62363	0.78799
748.52		0.85799	0.95533	0.67632	0.79749
750		0.86824	0.937	0.66952	0.77778
751.47		0.87478	0.95337	0.62191	0.79348
752.94		0.8939	0.94322	0.6069	0.7493
754.42		0.90866	0.95291	0.63999	0.79326
755.89		0.89027	0.94324	0.64294	0.7815
757.37		0.88547	0.96105	0.65877	0.78852
758.84		0.89757	0.9249	0.66247	0.75927
760.31		0.86659	0.96168	0.64109	0.79862
761.79		0.86497	0.97293	0.61973	0.77485
763.26		0.87367	0.93736	0.64555	0.77946
764.73		0.88416	0.95358	0.65446	0.76256
766.21		0.87359	0.95494	0.66091	0.78765
767.68		0.88474	0.96357	0.65743	0.79857
769.15		0.88111	0.97263	0.61994	0.7927
770.63		0.88451	0.94904	0.61854	0.77671
772.1		0.87563	0.9547	0.62819	0.75331
773.57		0.88975	0.95773	0.63976	0.79221
775.05		0.87128	0.93711	0.63652	0.74595
776.52		0.88476	0.96056	0.63773	0.79165
777.99		0.87689	0.96602	0.6296	0.78167
779.47		0.88867	0.96847	0.63915	0.77688
780.94		0.88388	0.9729	0.64063	0.77355
782.41		0.87717	0.95701	0.65312	0.76761
783.89		0.89837	0.95181	0.64428	0.7918
785.36		0.88808	0.96228	0.63769	0.74211
786.83		0.87601	0.96211	0.62481	0.76618
788.31		0.89439	0.94637	0.65348	0.78482
789.78		0.8917	0.95988	0.63581	0.77501
791.26		0.88798	0.96804	0.63031	0.79003
792.73		0.88407	0.93645	0.63212	0.73902
794.2		0.88132	0.9681	0.64201	0.77804
795.68		0.89028	0.95086	0.66308	0.79226
797.15		0.88301	0.95681	0.62093	0.76192
798.62		0.8706	0.94489	0.62555	0.76603
800.1		0.8886	0.97743	0.63661	0.78909
801.57		0.88134	0.93944	0.63116	0.78926
803.04		0.90219	0.94279	0.62387	0.77372
804.52		0.88692	0.93382	0.66679	0.78531
805.99		0.8708	0.96083	0.64763	0.77986
807.46		0.87929	0.96935	0.63597	0.73323
808.94		0.85913	0.95729	0.61575	0.81023
810.41		0.87274	0.96967	0.64961	0.77782
811.88		0.86255	0.98339	0.64447	0.77203
813.36		0.8908	0.97256	0.63999	0.77925
814.83		0.87594	0.95235	0.62014	0.79421
816.3		0.86633	0.9485	0.65045	0.79106
817.78		0.87467	0.94699	0.64006	0.7747
819.25		0.90207	0.96005	0.65729	0.77577
820.72		0.89032	0.94551	0.63782	0.78073
822.2		0.90409	0.95723	0.63712	0.82063
823.67		0.88256	0.95419	0.60616	0.80087
825.15		0.86157	0.94244	0.67148	0.77464
826.62		0.88965	0.9396	0.60626	0.75597
828.09		0.89929	0.94103	0.61562	0.84516
829.57		0.88716	0.93556	0.62855	0.75924
831.04		0.88463	0.97444	0.65649	0.76384
832.51		0.88962	0.95611	0.63928	0.79847
833.99		0.87758	0.96109	0.66785	0.75669
835.46		0.88939	0.96571	0.63983	0.77187
836.93		0.91185	0.96517	0.62853	0.8054
838.41		0.88007	0.9398	0.64782	0.74502
839.88		0.88219	0.96179	0.61954	0.806
841.35		0.89068	0.97329	0.62889	0.76922
842.83		0.86962	0.97699	0.62831	0.75132
844.3		0.89374	0.95522	0.65558	0.77611
845.77		0.88807	0.9567	0.60933	0.79408
847.25		0.86341	0.97288	0.66092	0.80339
848.72		0.87039	0.95886	0.65192	0.74807
850.19		0.89202	0.96144	0.64078	0.77352
851.67		0.84873	0.95563	0.65712	0.79185
853.14		0.88855	0.94299	0.6732	0.76447
854.61		0.88732	0.97279	0.63263	0.79108
856.09		0.88516	0.95367	0.64284	0.7732
857.56		0.89714	0.97147	0.63287	0.74402
859.04		0.86968	0.96481	0.64293	0.79196
860.51		0.84911	0.94161	0.63281	0.77831
861.98		0.86334	0.9668	0.61707	0.77294
863.46		0.89946	0.97908	0.64556	0.7758
864.93		0.89959	0.94273	0.64669	0.7645
866.4		0.86996	0.94175	0.64508	0.78518
867.88		0.87855	0.9405	0.63505	0.81147
869.35		0.87362	0.9301	0.68163	0.77148
870.82		0.90503	0.96276	0.63729	0.77239
872.3		0.89103	0.95234	0.66163	0.76244
873.77		0.88495	0.97701	0.64897	0.73235
875.24		0.90915	0.97722	0.63694	0.77694
876.72		0.90052	0.94737	0.63943	0.73272
878.19		0.87815	0.93139	0.64473	0.80714
879.66		0.90449	0.97472	0.64408	0.78659
881.14		0.88787	0.98198	0.64831	0.7917
882.61		0.90089	0.97165	0.63074	0.76788
884.08		0.88076	0.93523	0.65412	0.79221
885.56		0.88333	0.9449	0.63008	0.76429
887.03		0.88947	0.96837	0.6389	0.80113
888.5		0.87299	0.9486	0.6404	0.74236
889.98		0.89666	0.96438	0.66113	0.75186
891.45		0.87552	0.96961	0.62859	0.7707
892.92		0.87588	0.95869	0.63899	0.78412
894.4		0.87035	0.94925	0.64597	0.7727
895.87		0.86086	0.94085	0.63524	0.79361
897.35		0.89613	0.97155	0.64829	0.7253
898.82		0.89203	0.93793	0.65833	0.77397
900.29		0.86403	0.96285	0.61582	0.77086
901.77		0.87049	0.945	0.62822	0.80903
903.24		0.86511	0.9489	0.63786	0.7666
904.71		0.90583	0.95807	0.65473	0.82205
906.19		0.9054	0.96242	0.6484	0.78493
907.66		0.87761	0.97747	0.63612	0.77388
909.13		0.88326	0.94498	0.66955	0.77887
910.61		0.89812	0.95048	0.64068	0.75294
912.08		0.8983	0.96237	0.63247	0.79356
913.55		0.88054	0.97013	0.61556	0.79711
915.03		0.87698	0.95448	0.65498	0.75772
916.5		0.86092	0.93613	0.64574	0.77897
917.97		0.89906	0.96088	0.63207	0.74809
919.45		0.87595	0.97343	0.63181	0.79495
920.92		0.88339	0.94833	0.65691	0.79984
922.39		0.8917	0.97753	0.61266	0.78909
923.87		0.87088	0.9849	0.63502	0.78364
925.34		0.90122	0.977	0.63905	0.7671
926.81		0.84978	0.949	0.65344	0.76395
928.29		0.89948	0.9764	0.63378	0.76894
929.76		0.88951	0.946	0.61939	0.75998
931.24		0.89288	0.95658	0.64061	0.78421
932.71		0.89938	0.98126	0.63405	0.78281
934.18		0.89059	0.96537	0.64936	0.76749
935.66		0.86949	0.95355	0.63505	0.77535
937.13		0.90012	0.96491	0.63014	0.78226
938.6		0.88026	0.9494	0.64605	0.80716
940.08		0.87457	0.99176	0.6414	0.78453
941.55		0.89059	0.96084	0.63018	0.78237
943.02		0.87274	0.95722	0.63661	0.77601
944.5		0.88619	0.95577	0.6116	0.75244
945.97		0.89402	0.9503	0.63388	0.843
947.44		0.88833	0.95728	0.64339	0.79094
948.92		0.88729	0.94246	0.63503	0.75861
950.39		0.88768	0.98798	0.6577	0.78282
951.86		0.88256	0.95608	0.65674	0.76107
953.34		0.86012	0.93462	0.62603	0.78689
954.81		0.88766	0.96497	0.6223	0.74766
956.28		0.88204	0.96278	0.63924	0.77342
957.76		0.87938	0.96714	0.64902	0.79046
959.23		0.878	0.95588	0.66946	0.7583
960.7		0.88404	0.98055	0.64152	0.75125
962.18		0.88707	0.98032	0.64095	0.75488
963.65		0.8826	0.97106	0.6271	0.74655
965.13		0.89427	0.94591	0.63272	0.78616
966.6		0.90169	0.98048	0.62282	0.75145
968.07		0.89195	0.95312	0.62741	0.75976
969.55		0.89138	0.96091	0.63954	0.77925
971.02		0.84887	0.95263	0.63285	0.78947
972.49		0.89514	0.95446	0.64287	0.78017
973.97		0.8965	0.98223	0.61323	0.79419
975.44		0.88962	0.96273	0.6184	0.73336
976.91		0.88972	0.95301	0.6471	0.79205
978.39		0.87461	0.98476	0.63866	0.7776
979.86		0.90735	0.97235	0.66232	0.80209
981.33		0.88398	0.95586	0.62282	0.76126
982.81		0.89443	0.93427	0.63401	0.79803
984.28		0.89511	0.965	0.63926	0.76853
985.75		0.89523	0.95686	0.61601	0.78982
987.23		0.88384	0.95006	0.61548	0.78882
988.7		0.88529	0.9619	0.63413	0.77573
990.17		0.88311	0.9467	0.6636	0.79512
991.65		0.87182	0.95271	0.62907	0.77683
993.12		0.8804	0.95949	0.65291	0.75305
994.59		0.87701	0.96178	0.6421	0.76378
996.07		0.88757	0.93522	0.63765	0.78654
997.54		0.90163	0.95461	0.60454	0.75571
999.02		0.87814	0.92736	0.6518	0.78574
1000.5		0.90621	0.96739	0.61314	0.73303
1002		0.8779	0.96486	0.62026	0.78906
1003.4		0.88228	0.9511	0.63482	0.8026
1004.9		0.886	0.97896	0.64606	0.75876
1006.4		0.86868	0.97776	0.64205	0.79921
1007.9		0.87372	0.96156	0.62669	0.76647
1009.3		0.87262	0.96086	0.61962	0.74801
1010.8		0.89239	0.94771	0.62726	0.78813
1012.3		0.87405	0.9714	0.62316	0.77251
1013.7		0.89336	0.93534	0.64212	0.777
1015.2		0.90258	0.92406	0.61619	0.78626
1016.7		0.88116	0.95996	0.61683	0.81287
1018.2		0.87638	0.95515	0.65405	0.76512
1019.6		0.86595	0.9738	0.64868	0.75168
1021.1		0.86822	0.96279	0.63743	0.76609
1022.6		0.89081	0.94634	0.64675	0.78135
1024.1		0.87946	0.96527	0.64204	0.76477
1025.5		0.88857	0.97062	0.64093	0.7406
1027		0.87706	0.93714	0.64015	0.77774
1028.5		0.88285	0.9789	0.63361	0.76851
1030		0.8937	0.96358	0.64118	0.79152
1031.4		0.88949	0.97785	0.61404	0.77317
1032.9		0.87791	0.96193	0.63447	0.76123
1034.4		0.89088	0.97657	0.6765	0.77668
1035.9		0.88344	0.98122	0.64766	0.80042
1037.3		0.88441	0.95864	0.61561	0.76041
1038.8		0.8853	0.96365	0.62344	0.75769
1040.3		0.88815	0.96608	0.62228	0.75884
1041.7		0.89281	0.96833	0.63456	0.76059
1043.2		0.86574	0.96287	0.6353	0.76507
1044.7		0.88022	0.93961	0.65282	0.78647
1046.2		0.89959	0.95051	0.6405	0.78076
1047.6		0.89014	0.96776	0.61835	0.80105
1049.1		0.87788	0.97089	0.64221	0.78821
1050.6		0.89459	0.96522	0.63197	0.76039
1052.1		0.89868	0.95373	0.64016	0.76786
1053.5		0.88604	0.96096	0.63994	0.81921
1055		0.887	0.92939	0.63741	0.75535
1056.5		0.84544	0.93918	0.6474	0.80122
1058		0.88999	0.95214	0.63887	0.81462
1059.4		0.86691	0.96124	0.62533	0.75331
1060.9		0.88668	0.95381	0.64545	0.77939
1062.4		0.88634	0.95595	0.6503	0.76113
1063.8		0.89333	0.9571	0.65779	0.75752
1065.3		0.8798	0.9413	0.60995	0.78926
1066.8		0.88759	0.95096	0.63207	0.77235
1068.3		0.88511	0.98257	0.65014	0.78011
1069.7		0.8875	0.95868	0.59173	0.80933
1071.2		0.89834	0.95055	0.63159	0.77919
1072.7		0.88225	0.95275	0.64715	0.76527
1074.2		0.88439	0.97086	0.64686	0.77909
1075.6		0.87163	0.95995	0.6457	0.74633
1077.1		0.89029	0.9857	0.65705	0.76862
1078.6		0.87558	0.95264	0.62634	0.77184
1080.1		0.8897	0.95067	0.62416	0.80101
1081.5		0.89508	0.94752	0.61672	0.76142
1083		0.88371	0.97134	0.62652	0.78501
1084.5		0.87992	0.94837	0.63773	0.76032
1085.9		0.86357	0.96157	0.62822	0.77961
1087.4		0.88528	0.95858	0.65569	0.78286
1088.9		0.87767	0.94548	0.61847	0.73865
1090.4		0.88208	0.96102	0.60518	0.76708
1091.8		0.88377	0.95762	0.63037	0.81031
1093.3		0.89015	0.95793	0.60567	0.78625
1094.8		0.89115	0.96975	0.64247	0.78156
1096.3		0.89248	0.94921	0.65023	0.7996
1097.7		0.90038	0.98871	0.63254	0.79157
1099.2		0.90454	0.96221	0.63476	0.74521
1100.7		0.87994	0.95136	0.62364	0.75866
1102.2		0.87477	0.95501	0.64116	0.79272
1103.6		0.8922	0.95942	0.6468	0.78039
1105.1		0.90595	0.95832	0.61533	0.76434
1106.6		0.90541	0.95721	0.62719	0.78854
1108.1		0.86828	0.97301	0.6458	0.79076
1109.5		0.8658	0.96153	0.62615	0.77111
1111		0.89974	0.94421	0.62535	0.75808
1112.5		0.89326	0.95776	0.62468	0.74698
1113.9		0.88459	0.96021	0.6388	0.77469
1115.4		0.88733	0.97329	0.61978	0.75375
1116.9		0.89748	0.95867	0.60012	0.76363
1118.4		0.88909	0.95652	0.65391	0.77384
1119.8		0.90335	0.93895	0.67724	0.76879
1121.3		0.89031	0.96118	0.64452	0.78726
1122.8		0.89148	0.96304	0.62824	0.78686
1124.3		0.87824	0.97427	0.66689	0.77702
1125.7		0.90361	0.96625	0.62875	0.75707
1127.2		0.88895	0.96703	0.64426	0.75528
1128.7		0.86386	0.96063	0.64933	0.78264
1130.2		0.87678	0.95133	0.64486	0.79827
1131.6		0.90415	0.94319	0.65397	0.78975
1133.1		0.89299	0.95848	0.5974	0.75515
1134.6		0.88914	0.92641	0.62191	0.7792
1136		0.89386	0.96284	0.59519	0.76258
1137.5		0.87281	0.97571	0.62302	0.77572
1139		0.88144	0.96162	0.61066	0.76497
1140.5		0.87388	0.96951	0.62826	0.76214
1141.9		0.8891	0.96776	0.61515	0.73773
1143.4		0.87459	0.95705	0.62603	0.76235
1144.9		0.88618	0.96456	0.62869	0.76245
1146.4		0.88996	0.9225	0.60977	0.77104
1147.8		0.895	0.9797	0.61779	0.7305
1149.3		0.89018	0.95705	0.64085	0.79154
1150.8		0.90923	0.94267	0.64239	0.7927
1152.3		0.88185	0.94169	0.61711	0.78677
1153.7		0.87716	0.94578	0.62431	0.76047
1155.2		0.88345	0.96466	0.62167	0.77143
1156.7		0.85846	0.95655	0.63304	0.78233
1158.2		0.8841	0.94621	0.58995	0.76556
1159.6		0.89816	0.9753	0.6176	0.77096
1161.1		0.86052	0.9451	0.61862	0.78528
1162.6		0.86471	0.96954	0.63449	0.79375
1164		0.88085	0.95846	0.62757	0.77629
1165.5		0.86183	0.96324	0.62947	0.77969
1167		0.87547	0.97363	0.59466	0.74489
1168.5		0.87306	0.97951	0.6329	0.7675
1169.9		0.86775	0.9574	0.6307	0.78398
1171.4		0.87709	0.96652	0.64342	0.76673
1172.9		0.86148	0.97535	0.65556	0.77663
1174.4		0.88745	0.95437	0.63284	0.75272
1175.8		0.89346	0.9657	0.65424	0.76991
1177.3		0.88658	0.97178	0.61625	0.74658
1178.8		0.88578	0.96424	0.63248	0.77697
1180.3		0.88147	0.95318	0.62734	0.78939
1181.7		0.88183	0.95629	0.64078	0.7831
1183.2		0.8772	0.9512	0.62853	0.77806
1184.7		0.88994	0.93017	0.62401	0.74679
1186.1		0.88289	0.95449	0.61581	0.76611
1187.6		0.88957	0.93788	0.61605	0.79168
1189.1		0.87616	0.95727	0.62065	0.77245
1190.6		0.88329	0.96707	0.6131	0.76104
1192		0.87851	0.97544	0.64985	0.75556
1193.5		0.88579	0.95776	0.63179	0.78033
1195		0.90511	0.94949	0.63961	0.76986
1196.5		0.89426	0.95496	0.64198	0.78486
1197.9		0.8907	0.9922	0.6225	0.75519
1199.4		0.8914	0.97003	0.62157	0.79988
1200.9		0.86885	0.97071	0.62643	0.73912
1202.4		0.89744	0.9672	0.64356	0.76129
1203.8		0.88488	0.96514	0.60634	0.76802
1205.3		0.87866	0.95827	0.63083	0.79139
1206.8		0.89962	0.93229	0.61945	0.79444
1208.2		0.89446	0.95645	0.64061	0.77012
1209.7		0.88741	0.9342	0.60554	0.81219
1211.2		0.86887	0.95207	0.65335	0.79523
1212.7		0.8898	0.97136	0.6509	0.77522
1214.1		0.8971	0.96998	0.61983	0.7566
1215.6		0.88505	0.94356	0.61778	0.735
1217.1		0.88391	0.96318	0.62173	0.76183
1218.6		0.88298	0.96259	0.62931	0.77436
1220		0.86038	0.91931	0.61841	0.78031
1221.5		0.90201	0.95294	0.63566	0.76691
1223		0.89007	0.96716	0.62748	0.79287
1224.5		0.86762	0.96874	0.65807	0.75757
1225.9		0.86646	0.94293	0.65345	0.74004
1227.4		0.88454	0.95451	0.62226	0.77741
1228.9		0.88487	0.94612	0.62094	0.73066
1230.4		0.88493	0.97804	0.64238	0.75697
1231.8		0.87692	0.95434	0.61631	0.76676
1233.3		0.9059	0.97854	0.62986	0.80738
1234.8		0.89011	0.97938	0.62939	0.81152
1236.2		0.90051	0.94739	0.65557	0.76
1237.7		0.86004	0.93185	0.63641	0.80769
1239.2		0.8979	0.96518	0.64348	0.77051
1240.7		0.87529	0.96231	0.65421	0.79379
1242.1		0.90058	0.96213	0.62338	0.8114
1243.6		0.89135	0.95224	0.60917	0.77751
1245.1		0.88192	0.93929	0.64293	0.75339
1246.6		0.88595	0.95759	0.63763	0.76674
1248		0.88412	0.95358	0.62872	0.78094
1249.5		0.88351	0.95917	0.63466	0.74006
1251		0.89542	0.96024	0.64146	0.77213
1252.5		0.88219	0.96199	0.6404	0.75283
1253.9		0.87659	0.96732	0.65418	0.76195
1255.4		0.88558	0.94586	0.63704	0.76734
1256.9		0.85374	0.95573	0.6089	0.74517
1258.3		0.87657	0.97295	0.6203	0.78653
1259.8		0.88767	0.96043	0.6156	0.79078
1261.3		0.89176	0.96483	0.64603	0.78064
1262.8		0.87	0.97133	0.62296	0.75064
1264.2		0.89459	0.98847	0.63846	0.79032
1265.7		0.88214	0.92617	0.62718	0.77913
1267.2		0.88408	0.96118	0.63634	0.78623
1268.7		0.89981	0.96386	0.65146	0.78091
1270.1		0.88846	0.95527	0.64471	0.77953
1271.6		0.91112	0.95686	0.63076	0.75023
1273.1		0.86587	0.95904	0.62085	0.75955
1274.6		0.86705	0.95594	0.63547	0.76733
1276		0.90574	0.97716	0.6212	0.76151
1277.5		0.87746	0.96181	0.62691	0.76277
1279		0.87192	0.96605	0.60271	0.76616
1280.4		0.87638	0.99656	0.60653	0.78752
1281.9		0.8876	0.96218	0.6504	0.73321
1283.4		0.88399	0.94582	0.64445	0.73679
1284.9		0.89652	0.94905	0.62715	0.74122
1286.3		0.89839	0.95435	0.60695	0.78727
1287.8		0.89535	0.97253	0.63446	0.77018
1289.3		0.89091	0.95362	0.60087	0.7578
1290.8		0.86775	0.97744	0.62331	0.78611
1292.2		0.88177	0.94002	0.63777	0.76845
1293.7		0.8848	0.966	0.59371	0.78326
1295.2		0.89408	0.95355	0.59629	0.77281
1296.7		0.90778	0.96805	0.65002	0.75382
1298.1		0.8848	0.99213	0.61738	0.74362
1299.6		0.8779	0.9605	0.62797	0.77711
1301.1		0.88612	0.96345	0.63452	0.73909
1302.6		0.87889	0.97215	0.62501	0.78438
1304		0.88605	0.94437	0.65083	0.76674
1305.5		0.90528	0.91582	0.64253	0.79029
1307		0.86775	0.95021	0.63423	0.77926
1308.4		0.90194	0.94981	0.62629	0.76375
1309.9		0.8915	0.9529	0.62267	0.72444
1311.4		0.86655	0.9529	0.61473	0.80376
1312.9		0.88402	0.95246	0.61268	0.75914
1314.3		0.86794	0.97325	0.64417	0.76951
1315.8		0.88446	0.97948	0.62761	0.76731
1317.3		0.89462	0.93913	0.65446	0.73859
1318.8		0.88197	0.96367	0.64597	0.75822
1320.2		0.899	0.97702	0.62785	0.78797
1321.7		0.87762	0.95832	0.61477	0.79826
1323.2		0.88312	0.96013	0.5999	0.74817
1324.7		0.8791	0.97258	0.62722	0.76402
1326.1		0.89787	0.95518	0.6307	0.79616
1327.6		0.87732	0.96005	0.61813	0.75819
1329.1		0.89412	0.96258	0.6408	0.78096
1330.5		0.87385	0.99144	0.62138	0.77738
1332		0.8865	0.95935	0.65465	0.79323
1333.5		0.87995	0.96164	0.62283	0.76906
1335		0.88754	0.9712	0.63227	0.75134
1336.4		0.87331	0.99091	0.63017	0.8176
1337.9		0.8938	0.95456	0.61684	0.7779
1339.4		0.88758	0.95653	0.60916	0.7771
1340.9		0.89818	0.96346	0.60305	0.78385
1342.3		0.88853	0.96136	0.62013	0.79579
1343.8		0.88667	0.9404	0.62447	0.76625
1345.3		0.87395	0.97581	0.62551	0.76104
1346.8		0.88271	0.96464	0.6481	0.75991
1348.2		0.87836	0.93787	0.61711	0.7686
1349.7		0.883	0.96747	0.62924	0.76282
1351.2		0.87705	0.96021	0.60375	0.78524
1352.6		0.89116	0.96464	0.61354	0.76485
1354.1		0.88589	0.98479	0.63613	0.75187
1355.6		0.87192	0.96836	0.66866	0.80834
1357.1		0.87919	0.98016	0.61296	0.75062
1358.5		0.88601	0.9677	0.62394	0.77597
1360		0.90251	0.95816	0.63353	0.80317
1361.5		0.87092	0.98269	0.63001	0.74618
1363		0.8765	0.99057	0.60754	0.79302
1364.4		0.87524	0.95209	0.62638	0.76271
1365.9		0.8723	0.94574	0.62286	0.78198
1367.4		0.87647	0.95549	0.66237	0.79087
1368.9		0.8952	0.96589	0.63509	0.77723
1370.3		0.87945	0.96155	0.62504	0.76344
1371.8		0.86899	0.93199	0.60253	0.79162
1373.3		0.88803	0.96601	0.63905	0.76608
1374.8		0.88468	0.9808	0.63025	0.77623
1376.2		0.88277	0.9609	0.62104	0.78081
1377.7		0.87254	0.96498	0.63234	0.77289
1379.2		0.86422	0.96318	0.6166	0.7544

## Sheet: F3-FS1-D
	Combined Dconfocal (um2s-1)	Standard Error	Percentage error
Cytoplasm (Instant)	38.48	1.97822	5.14095
Nucleus (Instant)	43.189	2.16944	5.02309
Cytoplasm (24hr)	49.522	4.14159	8.36314
Nucleus(24hr)	39.637	3.5768	9.02392
