# Supplementary material for: Reversing protonation of weakly basic drugs greatly enhances intracellular diffusion and decreases lysosomal sequestration
Source: eLife. 2024 Dec 6;13:RP97255. doi: 10.7554/eLife.97255 (PMC11623935; doi:10.7554/eLife.97255)
Supplement: Figure 3—figure supplement 2—source data 1. [file elife-97255-fig3-figsupp2-data1.xlsx]

## Sheet: F3-FS2-A
Time	1st Run	2nd Run	3rd Run			Individual FRAP Runs-3 demos
0	721.8	569.8	487.5			Fluorescein in cytoplasm
1.4735	860.8	457.1	700.7
2.9469	735.5	602.3	792.2
4.4204	984.4	687.4	768.3
5.8939	786.1	649.7	750.6
7.3674	1017.8	791.7	808.8
8.8408	1374	740.2	888.7
10.314	1037	770.5	959.6
11.788	1433.3	803.3	962.4
13.261	1143	886.6	984
14.735	1334.9	758.1	1138.3
16.208	1312.4	920.4	1091
17.682	1352.2	933.1	1288.7
19.155	1307.6	1005.8	1169.3
20.629	1527.6	1001.2	1079.9
22.102	1589.2	957.4	1234
23.576	1439.8	1190.4	1338
25.049	1465.6	998.3	1399.3
26.523	1576.5	1022.7	1267.9
27.996	1783	909.6	1269.6
29.469	1665.9	1007.3	1302.2
30.943	1607.9	1034.3	1190.1
32.416	1694	1072.7	1276.8
33.89	1711.7	1349	1236.7
35.363	1753.6	1138.3	1214.7
36.837	1756.9	1182.5	1355.2
38.31	1961.7	1151.1	1143.9
39.784	1903.1	1118.4	1373.6
41.257	1765	1062	1073.1
42.731	1632.2	1149.4	1345.8
44.204	1858.1	1028.8	1455.3
45.678	1758.7	1154.2	1530
47.151	1861.4	1218	1444
48.625	1790.5	1384.1	1544.3
50.098	1825.9	1196.4	1537.4
51.572	1870.1	1382.1	1372.2
53.045	1768.8	1454.6	1444.2
54.519	2004.1	1377.4	1643.6
55.992	1826.9	1096.6	1370.6
57.465	1761.4	1378	1582.3
58.939	2035.9	1180.5	1327.5
60.412	1808.5	1321.6	1382.1
61.886	1968.7	1343.7	1800.6
63.359	1947.3	1332.2	1417.2
64.833	1576.9	1375.8	1378.3
66.306	2117.8	1256.6	1432.5
67.78	2025	1485	1281.6
69.253	1821.8	1640.8	1534.5
70.727	1975.5	1391	1915.7
72.2	2017.2	1259.6	1638
73.674	1855.5	1293.4	1606.3
75.147	2336.1	1509.9	1371.5
76.621	2049.1	1183.4	1370
78.094	1928.7	1240.2	1370.5
79.568	2203.4	1415.2	1521.3
81.041	2090.1	1196.7	1550.1
82.515	1767.8	1298.5	1571.1
83.988	2024.1	1395.7	1798.1
85.461	1977.5	1332.8	1613.3
86.935	1831	1371.1	1741.3
88.408	2076.2	1575	1732.4
89.882	2099	1169.1	1794.4
91.355	2122.6	1407.2	1464.6
92.829	2123.5	1224.4	1784
94.302	1886.2	1299.2	1817.1
95.776	2048.9	1378.3	1452.3
97.249	2026	1414.6	1529.9
98.723	2046.2	1576	1910.3
100.2	2236.1	1497.2	1604.5
101.67	1923.1	1207.7	1900.8
103.14	2191.8	1329.1	1544.1
104.62	2059.5	1260.1	1518
106.09	1957.6	1441.3	1680.3
107.56	2272.7	1554.7	1606.3
109.04	2108.5	1515.6	1684.2
110.51	2184.5	1407.8	1727.3
111.98	2143.9	1471.6	1825.9
113.46	2116.6	1529.9	1555.5
114.93	1930.5	1437.9	1567.3
116.4	2167.4	1603.1	1763.3
117.88	2146.4	1423.1	1920.5
119.35	2438.8	1584.1	1698.3
120.82	2052.8	1463.3	1708
122.3	2472.3	1543.6	1841.3
123.77	2249.2	1356.1	1708.7
125.25	2185.1	1583.7	1565.9
126.72	2248.5	1391.9	1616.8
128.19	2149.1	1322.6	1863.2
129.67	2149	1566.5	1811.5
131.14	2197.8	1559.2	1681.9
132.61	2440.3	1481.7	1663.2
134.09	2095.7	1405.6	1461.9
135.56	2384.7	1275.1	1537.6
137.03	2207.1	1426.8	1768.6
138.51	2224.2	1479.9	1853.6
139.98	2398.9	1430.6	1732.1
141.45	2229.9	1324.9	1539.6
142.93	1997.9	1340	1634.6
144.4	2006.3	1485.4	1829
145.87	2196.5	1291.3	1633.2
147.35	2486	1414.8	1605.9
148.82	2163.5	1609.1	1801.8
150.29	2343.5	1474.7	1690.1
151.77	2273.5	1618.7	1885.7
153.24	2371	1461.1	1708.7
154.71	2125.2	1468.8	1645.4
156.19	2334.1	1106	1836
157.66	2301.9	1660.4	1937.4
159.14	2357.8	1447	1754.1
160.61	2246.4	1592.8	1835.4
162.08	2197	1504.4	2065.6
163.56	2160.2	1367	1882
165.03	2301.5	1712.5	2025.8
166.5	1991.4	1553.9	1733.6
167.98	2351.5	1637.5	1845.1
169.45	2250.5	1458.5	1806.5
170.92	2210.6	1605.9	1561
172.4	2391.5	1546.2	1551.6
173.87	2398.8	1757.5	1645.7
175.34	2253.7	1407.6	2036.1
176.82	2023.7	1620.8	1641.9
178.29	2080	1411.9	1767.8
179.76	2594.2	1440.8	1646
181.24	2205.1	1554.3	1933.7
182.71	2607.9	1348	1799.6
184.18	2425.5	1429	1662
185.66	2353.7	1643.9	1519.7
187.13	2272.4	1570.6	1927.9
188.6	2436.4	1282.2	1810.5
190.08	2212.2	1732.2	1901.2
191.55	2241.4	1427	1702.9
193.03	2159.9	1539	1595.6
194.5	2353.4	1729.7	1700.6
195.97	2428.1	1368.2	1748.4
197.45	2409.3	1428.8	1781.3
198.92	2087.1	1566.3	1933.4
200.39	2767	1651.4	1813.6
201.87	2416.8	1552.9	1723.9
203.34	2246.6	1469.6	1690.8
204.81	2249.2	1767	1987.5
206.29	2490.3	1687.1	1611.9
207.76	2600.9	1567.1	1636
209.23	2182.5	1444.4	1928.1
210.71	2563	1665.9	1861.7
212.18	2799.4	1589.5	1685.6
213.65	2180	1556.2	2009
215.13	2489	1641.6	1873.6
216.6	2260.9	1538.1	2149
218.07	2284.7	1692.4	1815.3
219.55	2153.7	1563.7	1921
221.02	2362.1	1448.5	2007.3
222.49	2356.7	1729.8	1797.6
223.97	2105.9	1695.4	1820.7
225.44	2302.7	1469.8	1919.1
226.91	2412.5	1528.6	1702.8
228.39	2375.9	1870.5	1974.2
229.86	2371.4	1590	2012.2
231.34	2097.6	1518.1	1974.2
232.81	2337.1	1736.5	1786.9
234.28	2427.8	1655.7	1811.7
235.76	2397.6	1620	2104.5
237.23	2798.6	1528.2	1894.7
238.7	2343.8	1662.5	1899.6
240.18	2423.2	1705	1691
241.65	2200.4	1550.9	2132.6
243.12	2512.7	1538	1820.4
244.6	2288	1571.2	1965.4
246.07	2574.5	1299.7	1770.1
247.54	2235.3	1541.6	1738.5
249.02	2373.2	1492.3	1805.3
250.49	2341.1	1696	1811.3
251.96	2184.5	1636.7	1722.2
253.44	2436.6	1739.4	1740.1
254.91	2204.9	1616.9	1700.5
256.38	2310.4	1469.4	1882.7
257.86	2253.3	1286	1889.6
259.33	2300.6	1669.4	1677.6
260.8	2205.5	1857.2	1724.2
262.28	2398.7	1473.2	1943.3
263.75	2217.5	1764.4	2024.7
265.23	2359.2	1729.3	1811.6
266.7	2610.4	1684.8	2005.3
268.17	2324.2	1623	1887.1
269.65	2484.8	1427.3	1715.8
271.12	2503.7	1594.6	1992.5
272.59	2298.7	1479.7	1887.5
274.07	2501.4	1589.2	1831.4
275.54	2228.7	1437.5	1739.3
277.01	2493.6	1730.5	1689.6
278.49	2536.7	1641.4	1823.7
279.96	2674.2	1468.7	1898.3
281.43	2393.9	1643.7	1787.8
282.91	2436.6	1652	1621.8
284.38	2657.8	1585.4	1810.3
285.85	2318.3	1582.9	1914.8
287.33	2265	1448.4	1793.2
288.8	2138.9	1646.1	1894.7
290.27	2333.6	1470.7	1965.2
291.75	2527.2	1579.2	2086.9
293.22	2224.8	1412.7	1749.8
294.69	2379.1	1477.7	1978
296.17	2333.9	1375.5	1895.2
297.64	2446.7	1760	1764.4
299.12	2667.3	1661.1	1747.9
300.59	2263.4	1812.5	1814.4
302.06	2280.4	1620.9	1677.2
303.54	2230.4	1629.6	1718.7
305.01	2042.9	1709.3	1770.2
306.48	2542	1480.7	1952.6
307.96	2492.8	1587.3	1718
309.43	2174.7	1706.3	1913.9
310.9	2543.7	1681.7	2084.3
312.38	2560.2	1423	1895.2
313.85	2401.8	1845.5	2035.1
315.32	2396.3	1428	1794
316.8	2538.8	1321.4	1610.3
318.27	2578.1	1639.2	1966.6
319.74	2447.8	1744	1882.5
321.22	2601.1	1690	1863.4
322.69	2247.3	1639.8	1816.2
324.16	2182.3	1675.2	1986.6
325.64	2305.9	1595.1	1902.5
327.11	2373	1853.3	1988.8
328.58	2445.3	1784.9	1774.7
330.06	2312.9	1740	1952.7
331.53	2411.6	1548	1884.6
333.01	2512.9	1522.2	1824.9
334.48	2605.9	1686.3	2105.5
335.95	2307.7	1709.5	1824.3
337.43	2320.2	1481.3	1950.1
338.9	2234.8	1678.8	2053.2
340.37	2313.5	1711.4	2144
341.85	2288.6	1808	1761.5
343.32	2499.9	1669.6	1675.2
344.79	2689.8	1659.1	2003.9
346.27	2489.3	1584	2062.8
347.74	2315.4	1946.3	1983.3
349.21	2601.3	1761.3	1875
350.69	2072.2	1472	1807.7
352.16	2560.9	1641.6	1961.3
353.63	2372.8	1567.2	1857.1
355.11	2090.6	1927.1	1997.8
356.58	2073.9	1467.5	1888.4
358.05	2398.8	1452.6	1687.6
359.53	2277.2	1843.3	1958.9
361	2529.9	1526.4	1944.5
362.47	2217	1622.3	1872.5
363.95	2241.2	1735.3	1775.4
365.42	2512.3	1448.1	2154
366.89	2471.1	1551.1	2010.5
368.37	2433.3	1707.7	1647.8
369.84	2456.5	1745.1	1867
371.32	2740.4	1892.9	2048.8
372.79	2304.5	1846.1	1871.9
374.26	2467.1	1469.4	1903.6
375.74	2506.3	1502.5	1701.3
377.21	2384.9	1625.5	1678.6
378.68	2578.2	1463.3	1864.4
380.16	2438.3	1601.1	1838.3
381.63	2350.7	1713.7	2119.3
383.1	2397.8	1605.3	1970.1
384.58	2356.7	1840	1937.7
386.05	2391.6	1604.8	2047
387.52	2705.7	1716.9	1895.7
389	2432.1	1501.2	1808.2
390.47	2398	1492.5	2170.7
391.94	2528.4	1477.4	1797.3
393.42	2496.9	1821.7	2007
394.89	2396.2	1766.1	1795.2
396.36	2523.1	1787.3	2045.8
397.84	2516.7	1612.3	2064.1
399.31	2439.8	1512.1	1753.6
400.78	2417.2	1649.5	2088
402.26	2322	1530.8	2139.4
403.73	2549.4	1633.4	1908.9
405.21	2473.2	1803	1722.5
406.68	2413.2	1481.8	2064.4
408.15	2746.3	1935.2	1907.9
409.63	2301.3	1674.5	2156.1
411.1	2522.7	1680.6	1747.5
412.57	2372.3	1661.6	1874
414.05	2470	1740.8	1695.3
415.52	2288.7	1680.7	1797.3
416.99	2338.5	1612.8	1893.8
418.47	2408	1681.6	1905.2
419.94	2546.4	1551.9	2074.4
421.41	2289.1	1627.6	2258.9
422.89	2243.1	1463.6	1893.7
424.36	2248.4	1583	1909.9
425.83	2428	1527.7	1793.5
427.31	2628.2	1435.2	1980.2
428.78	2422	1607.8	1845
430.25	2146.4	1713.9	2027.3
431.73	2382.2	1543.3	2026.5
433.2	2836.4	1804.3	2016.5
434.67	2644.3	1777.1	1765
436.15	2447.4	1682.2	2161.5
437.62	2418.1	1819.4	2123.6
439.1	2239.1	1808	1807.3
440.57	2434	1621.2	1882
442.04	2199.6	1523.6	2080.5
443.52	2352.1	1618.8	1809.4
444.99	2448	1794.4	1981.4
446.46	2519.4	1537.5	1808.4
447.94	2523.5	1704.3	1915
449.41	2339.6	1715.9	1857.6
450.88	2410.3	1912.5	1731.2
452.36	2395.9	1622.1	2149.9
453.83	2212.1	1890.4	1953.5
455.3	2632.1	1723.6	1717.8
456.78	2333.5	1577	1905.4
458.25	2515.6	1507.3	2227.4
459.72	2473.5	1822.4	2092.1
461.2	2207.8	1660	1949.6
462.67	2406.8	1497.2	2150
464.14	2177.3	1589.1	2145.6
465.62	2408.7	1660	1737.4
467.09	2242.4	1752.4	1797.3
468.56	2518.1	1670.6	2052.7
470.04	2376.7	1771.4	2092.2
471.51	2135.1	1509.5	2105.4
472.98	2769.3	1772.4	2041.8
474.46	2240.8	1559.7	1844.3
475.93	2667.7	1636.7	1820.1
477.41	2309.5	1669.7	1922.7
478.88	2439.9	1800.5	2057.1
480.35	2320.9	1641.4	1786.5
481.83	2513.7	1527.6	2010.2
483.3	2404.9	1583.6	1867.6
484.77	2639.4	1802.9	1784.8
486.25	2517.8	1966.8	1773.7
487.72	2545.7	1564.8	1844
489.19	2376.3	1808.1	2047.2
490.67	2709.6	1977.8	1827.9
492.14	2584.4	1570.1	1736.2
493.61	2350.5	1767.7	1922.5
495.09	2714.6	1800.9	2254.8
496.56	2581.5	1728.7	2044
498.03	2414.6	1748	1939
499.51	2413.1	1799	2260.8
500.98	2556.6	1599.6	2034.7
502.45	2457.9	1845.5	1969.2
503.93	2410.6	1741.6	2076.2
505.4	2697.7	1467.3	1928
506.87	2333.1	1722.9	1767.7
508.35	2455.1	1672.6	2067.3
509.82	2667.8	1603.2	1793
511.3	2476.7	1775.4	1828.7
512.77	2491.6	1730	1869.3
514.24	2269.8	1831.8	1937.3
515.72	2447.1	1687.2	2063.8
517.19	2363.4	1859.3	2117.1
518.66	2339.9	1720.3	2051.8
520.14	2404	1701.4	2035.9
521.61	2187	1615.6	1846
523.08	2163.6	1483.3	1793.3
524.56	2298.7	1695.8	2085.4
526.03	2297.4	1562	2018.6
527.5	2544.1	1825.1	1896.3
528.98	2711.4	1630.5	1866.8
530.45	2441.6	1489.2	2023
531.92	2399.2	1795	1942.9
533.4	2436.2	1608	1754.6
534.87	2452.1	1465.5	1940.7
536.34	2608.2	1859.9	1653
537.82	2310.3	1584	1708.4
539.29	2312.8	1474.6	1785.9
540.76	2715.5	1772.8	1932.2
542.24	2424.1	1717.6	1767.3
543.71	2278.7	1665.6	1932.8
545.19	2768.7	1664.5	1759.4
546.66	2222.1	1717	2126
548.13	2486.9	1722.6	1950.7
549.61	2631.8	1770.3	1990.2
551.08	2453.9	1862.4	1956.5
552.55	2949	1975.7	2222.5
554.03	2429.8	1746.6	2171.1
555.5	2346.7	1836.1	1868.2
556.97	2492.7	1721.4	1970.4
558.45	2534.5	1744.1	1826.2
559.92	2346.7	1892.7	1786.8
561.39	2669.5	1577.4	1981.7
562.87	2444.1	1791.8	1873
564.34	2605.3	1455.1	1803.6
565.81	2249.8	1485.7	1804.7
567.29	2205.5	1718.3	1896.3
568.76	2343	1562.9	1929.9
570.23	2444.3	1675.5	2041.3
571.71	2432	1694.6	1700.6
573.18	2397.1	1701.2	2105.2
574.65	2299.6	1577	2168.4
576.13	2714.4	1671.3	2098.3
577.6	2431.6	1664.7	1974.6
579.08	2663.8	1620.8	1843.2
580.55	2713	1798.9	2070.7
582.02	2683.8	1648.8	1926.2
583.5	2413	1828.3	1808.8
584.97	2678	1686.3	2093.5
586.44	2507.4	1637.7	1765.9
587.92	2366.9	1732.6	1823
589.39	2503.4	1370.5	1899.7
590.86	2695.1	1931.3	2237.1
592.34	2648.9	1846.2	2101.8
593.81	2577.8	1702.2	1945.6
595.28	2382.1	1760.2	2007.9
596.76	2452.2	1649.8	1958.1
598.23	2848.6	1694	2145.4
599.7	2648.9	1586.1	2015.6
601.18	2649.7	1762.1	2093.8
602.65	2495.9	1604.4	2074.6
604.12	2114.5	1775.6	1896.5
605.6	2401.4	1635.3	1920.5
607.07	2531.7	1698.8	1968.1
608.54	2433.8	1598.2	2004.9
610.02	2508.3	1720.4	1906.3
611.49	2373.2	1808	1977.1
612.96	2361.3	1692.2	2015.4
614.44	2664.3	1992.3	1857.8
615.91	2555.8	1722.4	1954.6
617.39	2320.1	1977.7	1876.9
618.86	2115.2	1850.5	1964
620.33	2548.6	1687.1	1970.4
621.81	2518.1	1664.8	1743.8
623.28	2499.5	1677.4	1766.1
624.75	2277.5	1678.1	2087.7
626.23	2561	1755.8	1752.3
627.7	2387.4	1621.4	2056.6
629.17	2521.4	1457.9	1978.9
630.65	2391.7	1650.6	1853.8
632.12	2228.3	1674.5	1964
633.59	2373.8	1901.2	1976.2
635.07	2638.7	1857.7	1849.9
636.54	2272.2	1537.4	2018.2
638.01	2419.7	1703	2112.8
639.49	2180.4	1758.4	1937.9
640.96	2310.2	1569.4	1994
642.43	2116.5	1658.6	1975.2
643.91	2661.8	1629.2	1867.3
645.38	2480.7	1780.4	2043.9
646.85	2357.1	1843.3	2100.5
648.33	2400.9	1608.7	1802.8
649.8	2413.8	1964.9	1815.2
651.28	2367.6	1809.8	2033.5
652.75	2535	1838.5	1985
654.22	2583.6	1757.8	1832.8
655.7	2695.9	1521.7	1920.8
657.17	2446.9	1790.2	1923.1
658.64	2697.6	1821.4	1949.7
660.12	2300.4	1967.5	2134.2
661.59	2638.1	1862.8	1912.1
663.06	2416.8	1979.5	1946.5
664.54	2429.7	1798.6	1945
666.01	2543.3	1609.7	2114.5
667.48	2460.6	1594.7	2053.8
668.96	2256.6	1580.5	1712.3
670.43	2280.4	1948.4	2028.4
671.9	2376.5	1627	1793.2
673.38	2336.1	1787	2055.4
674.85	2173.4	1590.9	1980.9
676.32	2580.4	1635	1951
677.8	2318.8	1835.9	2037.1
679.27	2461.6	1816	1843.9
680.74	2502.8	1739.2	2099.8
682.22	2479.1	1680.4	2079
683.69	2444.7	1828.8	1927.5
685.17	2509.5	1916.2	2048.4
686.64	2219.6	1735.9	1825.2
688.11	2465.7	1708.4	2256.6
689.59	2693.9	1899.2	2066.5
691.06	2650.1	1888.6	2126
692.53	2479.7	1872.9	1975.4
694.01	2581.1	1862	1762.7
695.48	2304.1	1922.6	1943.1
696.95	2310.3	1703.9	1749.5
698.43	2345.4	1699	2153
699.9	2240	1891.6	1850.4
701.37	2666.6	1708.3	1875.3
702.85	2653.9	1629.6	2027
704.32	2488.6	1926.6	1956.1
705.79	2083.2	1640.6	2153.3
707.27	2174.4	1809.8	1920.6
708.74	2370.9	1970.3	2139.7
710.21	2568.4	1659.7	1984.3
711.69	2535.1	1754.2	2109.9
713.16	2559.6	1772.6	1896
714.63	2581.8	1680.7	2167.7
716.11	2473.5	1745.1	2063.2
717.58	2525.9	1812	2150.9
719.06	2235.7	1890.9	1974.9
720.53	2330.8	1621.2	1534.6
722	2204.9	1889.9	2117.7
723.48	2517.9	1815.5	1803.1
724.95	2534.7	1934.9	1953.8
726.42	2312	1724.6	1986.4
727.9	2460	1820.8	1885.7
729.37	2637.1	1544.1	1786.6
730.84	2502.8	1654.4	2123.8
732.32	2695.2	1858.4	2083.7
733.79	2460.7	1484	1960.9
735.26	2524.9	1844.5	2119.2
736.74	2606.7	1771.5	2165.2
738.21	2346.6	1858.5	2252
739.68	2542.7	1770.3	2171
741.16	2561.3	1570.5	1899.7
742.63	2584.4	1744.3	2061.3
744.1	2699.8	1639.7	2111.7
745.58	2466.4	2101.1	2108.8
747.05	2686.2	1880	2231.6
748.52	2636.1	1598.4	2073.9
750	2528	1867.9	1983.9
751.47	2563.8	1874.9	1995.2
752.94	3062.8	1863.7	1989.2
754.42	2433.3	1763.9	1832.6
755.89	2420.4	1892.8	1994.1
757.37	2522.7	1605.7	1758.8
758.84	2475.2	1740.1	2055.3
760.31	2309.8	1557.9	1884.3
761.79	2394.8	1793.7	1943.3
763.26	2151.5	1565.4	1946
764.73	2533.7	1840.3	1936.1
766.21	2462.7	1589.2	1851.5
767.68	2468	1815.4	2047.2
769.15	2423.3	1686.6	1841.8
770.63	2507.2	1636.7	1884.4
772.1	2549.2	1867.5	1905.2
773.57	2442.8	1691.9	2254.2
775.05	2637.4	1707.4	2139.1
776.52	2538.7	1823.8	2094.5
777.99	2419.7	1671.4	2018.1
779.47	2711.7	1714.7	2098.2
780.94	2510.1	1773.8	1888.1
782.41	2438	1918.1	1887.6
783.89	2687.1	1583.7	2090
785.36	2514	1766.1	2155.3
786.83	2400.8	1792	1941.8
788.31	2451.1	1791.8	1994.4
789.78	2541.8	1890.3	2072.2
791.26	2668.1	1700.9	2123.8
792.73	2534.4	1850.5	1814.2
794.2	2503.9	1791.7	2117
795.68	2456.2	1665.9	2159.1
797.15	2754.3	1840.7	1971.2
798.62	2532.6	1645	1833.7
800.1	2521	1868.3	1887
801.57	2718.9	1807.3	1792.5
803.04	2508.6	1680.2	1949.5
804.52	2408.2	1679	2186.4
805.99	2588	1637	2112.1
807.46	2315	1611.9	1906.6
808.94	2432.2	1691.2	1979.6
810.41	2630.1	1493	1878.2
811.88	2593	1694	1891
813.36	2526.4	1705.5	2098
814.83	2804.9	1821.6	2026.1
816.3	2397.8	1666.1	1968.9
817.78	2415.6	1710.5	2117.5
819.25	2687.8	1898.2	2158.2
820.72	2793.5	1810.5	1983.3
822.2	2530.3	1646.8	2142.7
823.67	2665.3	1908.9	2052.3
825.15	2564.5	1390.7	1875.5
826.62	2508.2	1935.9	1737.6
828.09	2742.6	1750.7	2086.4
829.57	2433.9	1774.1	1969.9
831.04	2604.7	1552.9	1828.1
832.51	2246.8	1608.8	2028.4
833.99	2740	1865.2	1983.6
835.46	2696.8	1698.5	2095
836.93	2390.7	1660.4	1891.3
838.41	2662.5	1783.1	1942.6
839.88	2436.2	1734.3	1941.8
841.35	2539.1	1673.4	1945.7
842.83	2401.3	1699.3	1924.4
844.3	2562.5	1754	1784.6
845.77	2152.8	2050.4	1790.7
847.25	2557.6	1734.6	1730.3
848.72	2406.8	1501.7	2184.6
850.19	2870.4	1414.7	2188.1
851.67	2506.2	1664.7	1748.5
853.14	2357.8	1705.1	2127.2
854.61	2684.1	1745.6	2071.8
856.09	2621	1852.1	2056.7
857.56	2668.7	1821.3	1758.3
859.04	2395.5	1691.3	1799.8
860.51	2584.1	1639.5	1749.2
861.98	2293.4	1603.7	1990.2
863.46	2407.5	1662.5	2148
864.93	2328	1562.1	2060.3
866.4	2381.5	1938.3	1975.7
867.88	2362.5	1804.5	2043.8
869.35	2365.9	1656.6	1960
870.82	2948.1	1783.1	1821.2
872.3	2739	1990.6	1958
873.77	2423.2	1650.2	2050
875.24	2450.2	1550	2032.7
876.72	2720.2	1825.7	2005.5
878.19	2586.9	1639.1	1861.1
879.66	2555.7	1795.6	2056.6
881.14	2450.9	1727.9	1894.6
882.61	2309	1744.2	2009.1
884.08	2715.8	1871.9	1784.9
885.56	2406	1764	2026.5
887.03	2553.5	1882.7	2012
888.5	2332.1	1861.9	1751.5
889.98	3022.4	1594.7	2010.3
891.45	2208.3	1782.8	2005.7
892.92	2121.8	1602.9	1927.7
894.4	2505.4	1757	1919.4
895.87	2540.8	1439.7	1942.7
897.35	2453.1	1605.7	2123.5
898.82	2600.1	1674.5	1708.5
900.29	2527.7	1475.7	1867.3
901.77	2712.5	1827.1	1861.8
903.24	2405	1723.9	2026.2
904.71	2506.7	1716.5	1665.2
906.19	2547.6	1777	1847.2
907.66	2349.3	1666.9	2108.5
909.13	2524.8	2005.3	2117
910.61	2634	1802.2	2215.7
912.08	2537.9	1757	2002.4
913.55	2423.4	1627.1	1853.3
915.03	2290.5	1927.1	1974.4
916.5	2618.4	1652.6	2064.5
917.97	2458.2	1757.8	2132.3
919.45	2621.9	1789.6	1891.6
920.92	2683.1	1613.3	1894.9
922.39	2635.9	1695.6	2155.6
923.87	2435	1777.2	1794.9
925.34	2329.4	1777.1	2242.3
926.81	2443.5	1508.7	2016.1
928.29	2712.2	1843.1	1881.6
929.76	2218.3	1679	1857.1
931.24	2686	1810.2	1924.7
932.71	2383.6	1826.5	2250
934.18	2536	1674.5	1991.1
935.66	2318.5	1771.1	1913.5
937.13	2575.4	1923.4	2118.1
938.6	2747.1	1786.7	1983.1
940.08	2347.5	1713	2074.2
941.55	2479.9	1561.5	1933.8
943.02	2398.2	1724.2	2137.6
944.5	2557.9	1825.4	2054.7
945.97	2393.3	1988.7	2001.6
947.44	2344.2	1839.7	2039.6
948.92	2421.4	1853.6	1925
950.39	2276.1	1650.2	1914.9
951.86	2615.3	1867	1916.8
953.34	2576.8	1921.8	1938.3
954.81	2735.4	1818.5	1829.3
956.28	2481.4	1783.9	2163.9
957.76	2626.2	1711.8	1984.6
959.23	2678.3	1743.9	2095.1
960.7	2917	1590.3	1936.1
962.18	2483.9	1672.5	1893.3
963.65	2550.2	1612.2	1700.7
965.13	2599.9	1814.6	2167.3
966.6	2856.4	1732.4	1883.1
968.07	2433.3	1797.2	2187.8
969.55	2837.7	1753.2	2004.6
971.02	2340.8	1783.1	1531.7
972.49	2669.3	1841.2	2041.5
973.97	3056.7	1827.2	1922.6
975.44	2397.3	1932.2	2178.7
976.91	2571.3	1870.2	1855.5
978.39	2292.2	1600.7	1918.4
979.86	2563.2	1906.7	2108.6
981.33	2456.9	1883.5	1897.6
982.81	2444.6	2067.6	1936.3
984.28	2378.5	1636.3	2071.2
985.75	2405.8	2156.2	2178.8
987.23	2681.5	1660	1981.3
988.7	2590.4	1465.5	1765.9
990.17	2651.1	1832.8	2016.7
991.65	2481.7	1686.7	1969.7
993.12	2304.4	1712	1931.1
994.59	2325.2	1800.1	1908.1
996.07	2679.7	1888.2	2020.5
997.54	2562.5	1968.3	2036
999.02	2773.7	1777	1982
1000.5	2555.8	1770.1	2032
1002	2415.1	1747.4	1833
1003.4	2340.2	1590	2089.4
1004.9	2292.5	1595.1	2122.2
1006.4	2409.6	1861.2	2016.7
1007.9	2447.3	1736.7	1807.4
1009.3	2349.9	1591.7	2008.7
1010.8	2413.8	1740.4	1902.4
1012.3	2556.8	1716.4	1980
1013.7	2476	1966.4	1850.7
1015.2	2574.5	1722.5	2033.2
1016.7	2345.4	1698.8	2102.8
1018.2	2566.5	1599.8	2083.2
1019.6	2460.7	1805.5	2079.9
1021.1	2376.9	1777.9	2130.8
1022.6	2539.3	1617	2076.5
1024.1	2694.7	1397.5	2162.2
1025.5	2703.6	1991.8	1791.5
1027	2785.5	1957.3	1700.1
1028.5	2295.4	1767.4	1992.5
1030	2444.7	1824.1	1974.1
1031.4	2864.7	1828.1	1971.3
1032.9	2089.9	1769.2	1914.3
1034.4	2824.4	1738.2	2113.3
1035.9	2542.8	1597.6	2042.7
1037.3	2717.1	1958.2	1984.5
1038.8	2413.1	1815.3	1929.7
1040.3	2527.5	1738.2	1720.4
1041.7	2744.8	1795.9	2089.5
1043.2	2522	1642.7	1899.3
1044.7	2210.1	1696.2	1986.2
1046.2	2634.1	1953.4	1862.3
1047.6	2467.7	1937.5	1935.6
1049.1	2590.8	1839.6	2195.4
1050.6	2436.5	1712.5	2097.6
1052.1	2763.2	1614	1935.7
1053.5	2463.4	1646	2106
1055	2702	1658.7	2062.2
1056.5	2535.3	1826.9	1993
1058	2522.8	1847.3	2110.5
1059.4	2758.7	1690	1961.1
1060.9	2547.5	1910.8	1960
1062.4	2399.2	1878.3	1992.6
1063.8	2469.2	1773.8	1957.2
1065.3	2456.5	1627.1	1951.9
1066.8	2634	1798.9	1986.9
1068.3	2707.4	1847.2	2071.2
1069.7	2488.6	1942.9	2361.5
1071.2	2286.8	1984.7	1821.7
1072.7	2310	1764.8	2132
1074.2	2352.2	1612.1	1965.4
1075.6	2407.3	1686.4	1835.1
1077.1	2674.2	1838.8	1810.9
1078.6	2618.4	1882.2	1850.3
1080.1	2478.4	1723.1	2144.4
1081.5	2699.4	1519.9	2200.2
1083	2517.5	1776.3	1878.4
1084.5	2310.1	1653.2	1895.2
1085.9	2575.7	1786	2061.6
1087.4	2122.7	1646.4	2002.2
1088.9	2911.8	1613.8	2061.1
1090.4	2428.4	1550.6	1927.5
1091.8	2473.5	1757.7	2117.6
1093.3	2504.1	1748.5	2060.5
1094.8	2313.6	1845	2061.3
1096.3	2558.8	1725.9	1813.5
1097.7	2366.9	1898.2	1927.6
1099.2	2799.5	2032.6	2112
1100.7	2507.9	1993.5	1893.6
1102.2	2402.5	1629.7	1824.5
1103.6	2519.9	1642.1	1944.5
1105.1	2601.1	1945.3	2108.2
1106.6	2660.2	1691.7	2088.7
1108.1	2646.8	1718	2218.1
1109.5	2526.6	1801	1820.3
1111	2398.9	1690.8	2250.7
1112.5	2678.3	1858.7	1589.7
1113.9	2148.1	1743.8	2209.3
1115.4	2420.5	1750.7	1955.8
1116.9	2597.1	1920.6	1994.2
1118.4	2612.7	1813.9	1822.1
1119.8	2582.1	1925.2	1941.5
1121.3	2677.4	1912.1	2220
1122.8	2513.8	1557.8	1966.9
1124.3	2397.1	1736.6	2124.9
1125.7	2530.9	1982.9	1873.1
1127.2	2650	1726.2	1995.1
1128.7	2593.6	1607.7	2143.8
1130.2	2415.5	1688.5	2026.7
1131.6	2639.7	2063.3	2076.8
1133.1	2658.2	1793.7	1972.4
1134.6	2568.2	1813.3	1793.3
1136	2596.8	1853.5	2008.4
1137.5	2291	1865.9	1802.9
1139	2537.8	1736.9	2065.2
1140.5	2415.6	1807.2	1893
1141.9	2415.7	2030.5	1836.5
1143.4	2532.7	1887.9	2023.5
1144.9	2376.1	1630	2036.3
1146.4	2464	1739.7	1717.5
1147.8	2441	1743	1839.6
1149.3	2749.1	1715	2181.2
1150.8	2678.4	1866.9	2123.6
1152.3	2406.5	1847.5	2056.9
1153.7	2638.4	1863.7	2093.7
1155.2	2833.6	1845.6	1952.5
1156.7	2099.2	1680.9	1932.8
1158.2	2500.9	1864.7	1981.4
1159.6	2649.5	1816.3	1944.3
1161.1	2612.4	1765.2	2130
1162.6	2180.4	1930.2	1921.4
1164	2522.6	1839.2	2185
1165.5	2195.3	1956.9	2092.7
1167	2593.8	1681.4	1858.9
1168.5	2518.8	1781.5	1786.6
1169.9	2468.7	1665.8	1771.9
1171.4	2337	1689.8	2023.7
1172.9	2373.3	1810.4	1881.6
1174.4	2534.5	1687.8	2104
1175.8	2631	1798.1	1818.2
1177.3	2718.8	2095	1796.7
1178.8	2329.9	1676.6	1859
1180.3	2507.9	1820.9	1893.5
1181.7	2582.4	1762.5	2022.7
1183.2	2294.8	1966.8	2168.4
1184.7	2473.6	1901.7	2132.2
1186.1	2689.1	1912.1	1902.7
1187.6	2256.4	1764.1	2097.6
1189.1	2337.2	1781.5	2064.1
1190.6	2235.2	1692.4	2069.5
1192	2451.4	1680	2251.6
1193.5	2396.2	2132.8	1884.3
1195	2277.3	2028.9	2123.2
1196.5	2470.9	1870.3	1719.8
1197.9	2112.1	2054.6	1940.9
1199.4	2338.8	1895.3	1899.9
1200.9	2329.4	1893.5	1986.4
1202.4	2400.4	1688.9	2198.8
1203.8	2451.8	1908.9	1850.4
1205.3	2525.9	1798.4	1812.6
1206.8	2529.9	1643.5	1909
1208.2	2442.4	1714	1991.1
1209.7	2561.5	1762.6	2204.2
1211.2	2381.1	1764.3	1944
1212.7	2771.1	1766.5	1992.9
1214.1	2728.8	1768.7	2069.4
1215.6	2736.4	1673.3	1918.6
1217.1	2797.9	1863.1	1817.7
1218.6	2486.9	1734.7	1770.7
1220	2553.5	1690.9	2021.7
1221.5	2693.8	1886.1	2073
1223	2751.5	1571.9	2005.9
1224.5	2170.2	1746.8	1884
1225.9	2528.5	1710.4	1982.9
1227.4	2498.4	1642.7	1785.8
1228.9	2524.6	1562.2	2229.6
1230.4	2426	1792.5	2390.5
1231.8	2522.3	1992.9	1946.2
1233.3	2507.5	1896.2	2004.7
1234.8	2449.1	2001.1	2073
1236.2	2392.9	1629.9	2021.8
1237.7	2352.6	1851.8	1896.4
1239.2	2505.5	1829.5	1932.1
1240.7	2555.8	1778.2	1920.1
1242.1	2590.8	1919.6	2101.6
1243.6	2540.8	1727.3	2078.3
1245.1	2345.5	1797	1955.4
1246.6	2451.1	1795.2	1703.4
1248	2307.2	1662.7	1755.8
1249.5	2428.6	1859.1	1679.5
1251	2426.1	1879.4	1972.1
1252.5	2473.9	1798.8	1746.7
1253.9	2371.6	1810.6	1861.4
1255.4	2180.2	1792.5	1848.5
1256.9	2571.9	1561.6	1560.9
1258.3	2635.7	1662.6	1847.9
1259.8	2240.5	1936.8	1972.3
1261.3	2372.8	1970.9	1921.4
1262.8	2532.9	1934.3	1887
1264.2	2360.5	1890.7	1784.1
1265.7	2248.5	1776.2	2149.9
1267.2	2648.8	1693.9	2050.6
1268.7	2510.5	1620.6	2129.5
1270.1	2397.4	1825.3	2024.4
1271.6	2520.6	1940.9	2187.4
1273.1	2511.4	1833.3	1916.9
1274.6	2151.7	1663.5	1940.3
1276	2780.2	1952.3	2158.4
1277.5	2401.9	1679.6	1789.7
1279	2322.4	1832.9	1813.7
1280.4	2402.6	1867	1950.9
1281.9	2504.8	1848.5	1822
1283.4	2485.2	1678.4	1885.2
1284.9	2365.3	1740.1	1805
1286.3	2551.1	1698.5	1780.4
1287.8	2461.1	1786.9	1878.5
1289.3	2381	2065.7	2197.5
1290.8	2518.9	1539.4	1864.8
1292.2	2365.9	1881.4	2099
1293.7	2543.5	1690.5	2193.1
1295.2	2561.2	1747.8	1962.9
1296.7	2415	1841.3	2019.9
1298.1	2491	1809.2	1688.9
1299.6	2194.6	1552	2239.9
1301.1	2559.2	2115.4	1828.3
1302.6	2493.2	1858.4	1989.4
1304	2464.5	2112.6	2067.5
1305.5	2773.6	1812.5	2116.4
1307	2432.9	1751.7	1982.1
1308.4	2887.7	1727.3	1969.6
1309.9	2406.2	1568.1	2001.4
1311.4	2428.7	1702.4	2048.6
1312.9	2841.1	2012.1	2102.7
1314.3	2595.2	1615.3	2060.1
1315.8	2658.8	1788.5	2060.4
1317.3	2786.9	1557.6	2249.5
1318.8	2410.9	1636.8	1972.1
1320.2	2528.8	1855.1	2043.2
1321.7	2493.4	1789.3	1825.4
1323.2	2518	1664.6	2148.7
1324.7	2471.1	1836.9	1822.2
1326.1	2538.5	1955.1	1977
1327.6	2525.5	1802.9	1884.4
1329.1	2510.8	1850.5	2070.2
1330.5	2228.1	1771.5	1725.1
1332	2351	1679	1848.1
1333.5	2440	1724.7	1788.9
1335	2505.2	1992.6	1986.2
1336.4	2365.9	2074.4	1903.3
1337.9	2549.6	1763.7	2239.3
1339.4	2720.7	1817	2084.3
1340.9	2435	1814	2047.5
1342.3	2401.2	1978.1	1917.2
1343.8	2356.5	1923.2	1821.3
1345.3	2392.7	1990.1	1933.8
1346.8	2552.4	1876.9	1886.3
1348.2	2702.4	1855.4	1764.2
1349.7	2154.5	1759.2	2006.5
1351.2	2499.1	1766.3	1945.2
1352.6	2427.9	1570.4	1873
1354.1	2524.2	1810.3	2006
1355.6	2480.1	1866.1	1793.2
1357.1	2551.8	1694	1949.5
1358.5	2609.6	1860.4	1938.4
1360	2464.1	2135.8	1908.4
1361.5	2471	1900.2	1905.6
1363	2668.2	1825.6	1814.8
1364.4	2384.8	1849.3	1831.2
1365.9	2436.3	1758.9	1983.5
1367.4	2385.9	1906.9	1795.4
1368.9	2491.9	1771.5	2219.1
1370.3	2711.7	1744.8	2023
1371.8	2720.3	1839.5	1989.6
1373.3	2668.8	1781	1861
1374.8	2534	1594.5	1985.4
1376.2	2236.3	1626.2	2106.7
1377.7	2365.6	1804.6	1694.3
1379.2	2550.1	1788.2	2066.3

## Sheet: F3-FS2-B
Individual Dconfocal (um2s-1)	Fluorescein in cytoplasm
31.026
38.228
44.77
58.335
15.388
40.632
31.93
37.19
46.175
37.416
25.876
51.731
43.586
37.402
74.208
41.174
35.532
22.09
39.918
20.977
40.608
34.868
63.663
35.981
36.472
29.71
25.15
39.547
31.548
41.729
28.878
35.58
16.443
27.627
36.076
50.013

## Sheet: F3-FS2-C-D
Time axis (re-adjusted)	Pre-Bleach	Combined FRAP Averaged Normalized		Fluorescein in cytoplasm
-13.261	1						Combined Dconfocal (um2s-1)	Standard Error	Percentage error
-11.788	0.97303					Cytoplasm	38.48	1.97822	5.14095
10.314	0.97311
-8.8408	0.96672
-7.3674	0.98315
-5.8939	0.98206
-4.4204	0.98772
-2.9469	0.98453
-1.4735	0.98658
0		0.22062
1.4735		0.2758
2.9469		0.30041
4.4204		0.34012
5.8939		0.34675
7.3674		0.38075
8.8408		0.40299
10.314		0.40987
11.788		0.44348
13.261		0.44499
14.735		0.45431
16.208		0.49491
17.682		0.49694
19.155		0.50464
20.629		0.50705
22.102		0.53065
23.576		0.53605
25.049		0.54603
26.523		0.58415
27.996		0.55519
29.469		0.57193
30.943		0.59113
32.416		0.57692
33.89		0.60326
35.363		0.60645
36.837		0.60838
38.31		0.62315
39.784		0.60706
41.257		0.61147
42.731		0.62566
44.204		0.6419
45.678		0.63361
47.151		0.64584
48.625		0.66404
50.098		0.65844
51.572		0.66483
53.045		0.66105
54.519		0.65572
55.992		0.65635
57.465		0.69
58.939		0.66986
60.412		0.68973
61.886		0.69878
63.359		0.67891
64.833		0.68564
66.306		0.69748
67.78		0.70048
69.253		0.72004
70.727		0.6971
72.2		0.71909
73.674		0.71166
75.147		0.7204
76.621		0.69396
78.094		0.73092
79.568		0.72732
81.041		0.70045
82.515		0.72402
83.988		0.71688
85.461		0.73117
86.935		0.74445
88.408		0.74816
89.882		0.74452
91.355		0.73186
92.829		0.74344
94.302		0.73148
95.776		0.72316
97.249		0.74165
98.723		0.76141
100.2		0.74854
101.67		0.72782
103.14		0.75066
104.62		0.73292
106.09		0.76402
107.56		0.76684
109.04		0.7581
110.51		0.75778
111.98		0.76579
113.46		0.78195
114.93		0.77256
116.4		0.77231
117.88		0.78507
119.35		0.75593
120.82		0.78852
122.3		0.77323
123.77		0.78408
125.25		0.77227
126.72		0.78174
128.19		0.79341
129.67		0.77438
131.14		0.77512
132.61		0.79696
134.09		0.75274
135.56		0.7853
137.03		0.78476
138.51		0.79688
139.98		0.79172
141.45		0.77007
142.93		0.76604
144.4		0.79867
145.87		0.77715
147.35		0.78968
148.82		0.80431
150.29		0.79143
151.77		0.81741
153.24		0.78612
154.71		0.79662
156.19		0.80383
157.66		0.81306
159.14		0.78176
160.61		0.80728
162.08		0.80465
163.56		0.81113
165.03		0.82494
166.5		0.80168
167.98		0.79177
169.45		0.80299
170.92		0.80774
172.4		0.79701
173.87		0.80629
175.34		0.81211
176.82		0.79407
178.29		0.80264
179.76		0.79105
181.24		0.81032
182.71		0.8221
184.18		0.78528
185.66		0.78633
187.13		0.82573
188.6		0.8193
190.08		0.83683
191.55		0.81318
193.03		0.81166
194.5		0.81164
195.97		0.80087
197.45		0.8228
198.92		0.82238
200.39		0.84797
201.87		0.82789
203.34		0.81149
204.81		0.82107
206.29		0.84182
207.76		0.8227
209.23		0.80664
210.71		0.82777
212.18		0.83524
213.65		0.82137
215.13		0.8203
216.6		0.82985
218.07		0.8243
219.55		0.82197
221.02		0.81436
222.49		0.82561
223.97		0.83097
225.44		0.82256
226.91		0.83982
228.39		0.84573
229.86		0.83134
231.34		0.83583
232.81		0.81331
234.28		0.84245
235.76		0.83469
237.23		0.83257
238.7		0.82346
240.18		0.84276
241.65		0.85826
243.12		0.84961
244.6		0.84881
246.07		0.81104
247.54		0.82107
249.02		0.84061
250.49		0.82675
251.96		0.83156
253.44		0.83238
254.91		0.83294
256.38		0.83383
257.86		0.83084
259.33		0.85092
260.8		0.85271
262.28		0.83884
263.75		0.83847
265.23		0.83851
266.7		0.86072
268.17		0.85648
269.65		0.83034
271.12		0.83519
272.59		0.83534
274.07		0.85407
275.54		0.84643
277.01		0.85811
278.49		0.84376
279.96		0.86866
281.43		0.83814
282.91		0.85543
284.38		0.85395
285.85		0.84517
287.33		0.84818
288.8		0.82633
290.27		0.83521
291.75		0.8258
293.22		0.8355
294.69		0.86337
296.17		0.84988
297.64		0.86153
299.12		0.86369
300.59		0.81794
302.06		0.85672
303.54		0.8353
305.01		0.82517
306.48		0.8537
307.96		0.84704
309.43		0.84002
310.9		0.84408
312.38		0.84403
313.85		0.8331
315.32		0.85623
316.8		0.85254
318.27		0.84335
319.74		0.86142
321.22		0.84701
322.69		0.852
324.16		0.86363
325.64		0.84502
327.11		0.85754
328.58		0.85472
330.06		0.86643
331.53		0.84583
333.01		0.86576
334.48		0.86248
335.95		0.84689
337.43		0.84972
338.9		0.85884
340.37		0.8648
341.85		0.85237
343.32		0.84282
344.79		0.87148
346.27		0.85467
347.74		0.85615
349.21		0.86131
350.69		0.86352
352.16		0.88519
353.63		0.84869
355.11		0.86888
356.58		0.83899
358.05		0.85274
359.53		0.84184
361		0.85604
362.47		0.83751
363.95		0.85042
365.42		0.85982
366.89		0.86547
368.37		0.87175
369.84		0.85642
371.32		0.88124
372.79		0.86085
374.26		0.85623
375.74		0.86704
377.21		0.86245
378.68		0.85164
380.16		0.85675
381.63		0.88771
383.1		0.87856
384.58		0.87231
386.05		0.85432
387.52		0.87184
389		0.86148
390.47		0.84852
391.94		0.87235
393.42		0.88314
394.89		0.85874
396.36		0.86468
397.84		0.8662
399.31		0.84769
400.78		0.86014
402.26		0.85083
403.73		0.85092
405.21		0.86368
406.68		0.86432
408.15		0.87449
409.63		0.86128
411.1		0.86279
412.57		0.84561
414.05		0.84855
415.52		0.86782
416.99		0.87016
418.47		0.88137
419.94		0.87405
421.41		0.87039
422.89		0.84393
424.36		0.85933
425.83		0.85338
427.31		0.86875
428.78		0.85718
430.25		0.87523
431.73		0.8504
433.2		0.8983
434.67		0.85899
436.15		0.86453
437.62		0.8781
439.1		0.86135
440.57		0.84781
442.04		0.84806
443.52		0.86445
444.99		0.86475
446.46		0.85004
447.94		0.86525
449.41		0.85093
450.88		0.85554
452.36		0.87096
453.83		0.86636
455.3		0.85425
456.78		0.87664
458.25		0.88899
459.72		0.85582
461.2		0.85023
462.67		0.86106
464.14		0.86131
465.62		0.86782
467.09		0.86275
468.56		0.87138
470.04		0.85657
471.51		0.85142
472.98		0.88257
474.46		0.88212
475.93		0.85907
477.41		0.87147
478.88		0.86312
480.35		0.86281
481.83		0.86395
483.3		0.85313
484.77		0.87685
486.25		0.86749
487.72		0.86408
489.19		0.8417
490.67		0.87733
492.14		0.86643
493.61		0.8813
495.09		0.89476
496.56		0.8943
498.03		0.85381
499.51		0.86871
500.98		0.88922
502.45		0.85578
503.93		0.87856
505.4		0.86991
506.87		0.87287
508.35		0.88249
509.82		0.87747
511.3		0.84081
512.77		0.85666
514.24		0.88085
515.72		0.86525
517.19		0.88401
518.66		0.85485
520.14		0.87062
521.61		0.87627
523.08		0.86693
524.56		0.8651
526.03		0.86461
527.5		0.86125
528.98		0.89541
530.45		0.88539
531.92		0.85594
533.4		0.86537
534.87		0.87412
536.34		0.86813
537.82		0.86294
539.29		0.86255
540.76		0.86295
542.24		0.89325
543.71		0.87037
545.19		0.86518
546.66		0.86234
548.13		0.86947
549.61		0.88046
551.08		0.88668
552.55		0.86051
554.03		0.89665
555.5		0.87152
556.97		0.86374
558.45		0.86862
559.92		0.87887
561.39		0.88014
562.87		0.88387
564.34		0.86621
565.81		0.87138
567.29		0.8643
568.76		0.86904
570.23		0.8855
571.71		0.86133
573.18		0.87971
574.65		0.8739
576.13		0.87986
577.6		0.88437
579.08		0.87548
580.55		0.89076
582.02		0.89076
583.5		0.86589
584.97		0.8658
586.44		0.87981
587.92		0.87031
589.39		0.85205
590.86		0.88627
592.34		0.8733
593.81		0.86668
595.28		0.88216
596.76		0.8769
598.23		0.87602
599.7		0.88448
601.18		0.86402
602.65		0.88181
604.12		0.89104
605.6		0.87003
607.07		0.87829
608.54		0.86966
610.02		0.88233
611.49		0.88507
612.96		0.86947
614.44		0.89589
615.91		0.87348
617.39		0.87152
618.86		0.86479
620.33		0.87884
621.81		0.8762
623.28		0.87398
624.75		0.89155
626.23		0.84642
627.7		0.89038
629.17		0.85958
630.65		0.88452
632.12		0.8886
633.59		0.87429
635.07		0.89607
636.54		0.86263
638.01		0.86688
639.49		0.88321
640.96		0.8694
642.43		0.87371
643.91		0.8909
645.38		0.89346
646.85		0.8842
648.33		0.86924
649.8		0.88077
651.28		0.8819
652.75		0.86665
654.22		0.87417
655.7		0.89134
657.17		0.89425
658.64		0.89692
660.12		0.87094
661.59		0.89643
663.06		0.88121
664.54		0.87257
666.01		0.87306
667.48		0.8763
668.96		0.88469
670.43		0.88233
671.9		0.87661
673.38		0.88999
674.85		0.88001
676.32		0.88233
677.8		0.89206
679.27		0.89898
680.74		0.88023
682.22		0.87889
683.69		0.8669
685.17		0.89098
686.64		0.87476
688.11		0.87299
689.59		0.88594
691.06		0.88159
692.53		0.88773
694.01		0.88883
695.48		0.87572
696.95		0.87456
698.43		0.86552
699.9		0.86233
701.37		0.86442
702.85		0.88226
704.32		0.87958
705.79		0.85208
707.27		0.88117
708.74		0.8887
710.21		0.89088
711.69		0.88092
713.16		0.87533
714.63		0.87877
716.11		0.86673
717.58		0.89808
719.06		0.86574
720.53		0.88083
722		0.87469
723.48		0.87871
724.95		0.8749
726.42		0.87609
727.9		0.87146
729.37		0.88549
730.84		0.88402
732.32		0.86987
733.79		0.87996
735.26		0.89031
736.74		0.90186
738.21		0.88489
739.68		0.89707
741.16		0.8836
742.63		0.8969
744.1		0.88568
745.58		0.88524
747.05		0.88222
748.52		0.85799
750		0.86824
751.47		0.87478
752.94		0.8939
754.42		0.90866
755.89		0.89027
757.37		0.88547
758.84		0.89757
760.31		0.86659
761.79		0.86497
763.26		0.87367
764.73		0.88416
766.21		0.87359
767.68		0.88474
769.15		0.88111
770.63		0.88451
772.1		0.87563
773.57		0.88975
775.05		0.87128
776.52		0.88476
777.99		0.87689
779.47		0.88867
780.94		0.88388
782.41		0.87717
783.89		0.89837
785.36		0.88808
786.83		0.87601
788.31		0.89439
789.78		0.8917
791.26		0.88798
792.73		0.88407
794.2		0.88132
795.68		0.89028
797.15		0.88301
798.62		0.8706
800.1		0.8886
801.57		0.88134
803.04		0.90219
804.52		0.88692
805.99		0.8708
807.46		0.87929
808.94		0.85913
810.41		0.87274
811.88		0.86255
813.36		0.8908
814.83		0.87594
816.3		0.86633
817.78		0.87467
819.25		0.90207
820.72		0.89032
822.2		0.90409
823.67		0.88256
825.15		0.86157
826.62		0.88965
828.09		0.89929
829.57		0.88716
831.04		0.88463
832.51		0.88962
833.99		0.87758
835.46		0.88939
836.93		0.91185
838.41		0.88007
839.88		0.88219
841.35		0.89068
842.83		0.86962
844.3		0.89374
845.77		0.88807
847.25		0.86341
848.72		0.87039
850.19		0.89202
851.67		0.84873
853.14		0.88855
854.61		0.88732
856.09		0.88516
857.56		0.89714
859.04		0.86968
860.51		0.84911
861.98		0.86334
863.46		0.89946
864.93		0.89959
866.4		0.86996
867.88		0.87855
869.35		0.87362
870.82		0.90503
872.3		0.89103
873.77		0.88495
875.24		0.90915
876.72		0.90052
878.19		0.87815
879.66		0.90449
881.14		0.88787
882.61		0.90089
884.08		0.88076
885.56		0.88333
887.03		0.88947
888.5		0.87299
889.98		0.89666
891.45		0.87552
892.92		0.87588
894.4		0.87035
895.87		0.86086
897.35		0.89613
898.82		0.89203
900.29		0.86403
901.77		0.87049
903.24		0.86511
904.71		0.90583
906.19		0.9054
907.66		0.87761
909.13		0.88326
910.61		0.89812
912.08		0.8983
913.55		0.88054
915.03		0.87698
916.5		0.86092
917.97		0.89906
919.45		0.87595
920.92		0.88339
922.39		0.8917
923.87		0.87088
925.34		0.90122
926.81		0.84978
928.29		0.89948
929.76		0.88951
931.24		0.89288
932.71		0.89938
934.18		0.89059
935.66		0.86949
937.13		0.90012
938.6		0.88026
940.08		0.87457
941.55		0.89059
943.02		0.87274
944.5		0.88619
945.97		0.89402
947.44		0.88833
948.92		0.88729
950.39		0.88768
951.86		0.88256
953.34		0.86012
954.81		0.88766
956.28		0.88204
957.76		0.87938
959.23		0.878
960.7		0.88404
962.18		0.88707
963.65		0.8826
965.13		0.89427
966.6		0.90169
968.07		0.89195
969.55		0.89138
971.02		0.84887
972.49		0.89514
973.97		0.8965
975.44		0.88962
976.91		0.88972
978.39		0.87461
979.86		0.90735
981.33		0.88398
982.81		0.89443
984.28		0.89511
985.75		0.89523
987.23		0.88384
988.7		0.88529
990.17		0.88311
991.65		0.87182
993.12		0.8804
994.59		0.87701
996.07		0.88757
997.54		0.90163
999.02		0.87814
1000.5		0.90621
1002		0.8779
1003.4		0.88228
1004.9		0.886
1006.4		0.86868
1007.9		0.87372
1009.3		0.87262
1010.8		0.89239
1012.3		0.87405
1013.7		0.89336
1015.2		0.90258
1016.7		0.88116
1018.2		0.87638
1019.6		0.86595
1021.1		0.86822
1022.6		0.89081
1024.1		0.87946
1025.5		0.88857
1027		0.87706
1028.5		0.88285
1030		0.8937
1031.4		0.88949
1032.9		0.87791
1034.4		0.89088
1035.9		0.88344
1037.3		0.88441
1038.8		0.8853
1040.3		0.88815
1041.7		0.89281
1043.2		0.86574
1044.7		0.88022
1046.2		0.89959
1047.6		0.89014
1049.1		0.87788
1050.6		0.89459
1052.1		0.89868
1053.5		0.88604
1055		0.887
1056.5		0.84544
1058		0.88999
1059.4		0.86691
1060.9		0.88668
1062.4		0.88634
1063.8		0.89333
1065.3		0.8798
1066.8		0.88759
1068.3		0.88511
1069.7		0.8875
1071.2		0.89834
1072.7		0.88225
1074.2		0.88439
1075.6		0.87163
1077.1		0.89029
1078.6		0.87558
1080.1		0.8897
1081.5		0.89508
1083		0.88371
1084.5		0.87992
1085.9		0.86357
1087.4		0.88528
1088.9		0.87767
1090.4		0.88208
1091.8		0.88377
1093.3		0.89015
1094.8		0.89115
1096.3		0.89248
1097.7		0.90038
1099.2		0.90454
1100.7		0.87994
1102.2		0.87477
1103.6		0.8922
1105.1		0.90595
1106.6		0.90541
1108.1		0.86828
1109.5		0.8658
1111		0.89974
1112.5		0.89326
1113.9		0.88459
1115.4		0.88733
1116.9		0.89748
1118.4		0.88909
1119.8		0.90335
1121.3		0.89031
1122.8		0.89148
1124.3		0.87824
1125.7		0.90361
1127.2		0.88895
1128.7		0.86386
1130.2		0.87678
1131.6		0.90415
1133.1		0.89299
1134.6		0.88914
1136		0.89386
1137.5		0.87281
1139		0.88144
1140.5		0.87388
1141.9		0.8891
1143.4		0.87459
1144.9		0.88618
1146.4		0.88996
1147.8		0.895
1149.3		0.89018
1150.8		0.90923
1152.3		0.88185
1153.7		0.87716
1155.2		0.88345
1156.7		0.85846
1158.2		0.8841
1159.6		0.89816
1161.1		0.86052
1162.6		0.86471
1164		0.88085
1165.5		0.86183
1167		0.87547
1168.5		0.87306
1169.9		0.86775
1171.4		0.87709
1172.9		0.86148
1174.4		0.88745
1175.8		0.89346
1177.3		0.88658
1178.8		0.88578
1180.3		0.88147
1181.7		0.88183
1183.2		0.8772
1184.7		0.88994
1186.1		0.88289
1187.6		0.88957
1189.1		0.87616
1190.6		0.88329
1192		0.87851
1193.5		0.88579
1195		0.90511
1196.5		0.89426
1197.9		0.8907
1199.4		0.8914
1200.9		0.86885
1202.4		0.89744
1203.8		0.88488
1205.3		0.87866
1206.8		0.89962
1208.2		0.89446
1209.7		0.88741
1211.2		0.86887
1212.7		0.8898
1214.1		0.8971
1215.6		0.88505
1217.1		0.88391
1218.6		0.88298
1220		0.86038
1221.5		0.90201
1223		0.89007
1224.5		0.86762
1225.9		0.86646
1227.4		0.88454
1228.9		0.88487
1230.4		0.88493
1231.8		0.87692
1233.3		0.9059
1234.8		0.89011
1236.2		0.90051
1237.7		0.86004
1239.2		0.8979
1240.7		0.87529
1242.1		0.90058
1243.6		0.89135
1245.1		0.88192
1246.6		0.88595
1248		0.88412
1249.5		0.88351
1251		0.89542
1252.5		0.88219
1253.9		0.87659
1255.4		0.88558
1256.9		0.85374
1258.3		0.87657
1259.8		0.88767
1261.3		0.89176
1262.8		0.87
1264.2		0.89459
1265.7		0.88214
1267.2		0.88408
1268.7		0.89981
1270.1		0.88846
1271.6		0.91112
1273.1		0.86587
1274.6		0.86705
1276		0.90574
1277.5		0.87746
1279		0.87192
1280.4		0.87638
1281.9		0.8876
1283.4		0.88399
1284.9		0.89652
1286.3		0.89839
1287.8		0.89535
1289.3		0.89091
1290.8		0.86775
1292.2		0.88177
1293.7		0.8848
1295.2		0.89408
1296.7		0.90778
1298.1		0.8848
1299.6		0.8779
1301.1		0.88612
1302.6		0.87889
1304		0.88605
1305.5		0.90528
1307		0.86775
1308.4		0.90194
1309.9		0.8915
1311.4		0.86655
1312.9		0.88402
1314.3		0.86794
1315.8		0.88446
1317.3		0.89462
1318.8		0.88197
1320.2		0.899
1321.7		0.87762
1323.2		0.88312
1324.7		0.8791
1326.1		0.89787
1327.6		0.87732
1329.1		0.89412
1330.5		0.87385
1332		0.8865
1333.5		0.87995
1335		0.88754
1336.4		0.87331
1337.9		0.8938
1339.4		0.88758
1340.9		0.89818
1342.3		0.88853
1343.8		0.88667
1345.3		0.87395
1346.8		0.88271
1348.2		0.87836
1349.7		0.883
1351.2		0.87705
1352.6		0.89116
1354.1		0.88589
1355.6		0.87192
1357.1		0.87919
1358.5		0.88601
1360		0.90251
1361.5		0.87092
1363		0.8765
1364.4		0.87524
1365.9		0.8723
1367.4		0.87647
1368.9		0.8952
1370.3		0.87945
1371.8		0.86899
1373.3		0.88803
1374.8		0.88468
1376.2		0.88277
1377.7		0.87254
1379.2		0.86422

## Sheet: F3-FS2-E-F
	Fluorescien in HeLa Cytoplasm			Fluorescien in HeLa Nucleus
Fluorescent signal (Conc.)	Average Rates k (s-1)		Fluorescent signal (Conc.)	Average Rates k (s-1)
1311.9	22.348		1156.1	20.987
1475.3	27.536		1359.4	25.382
1427.8	32.248		1450.6	32.215
1174.9	42.019		1047.3	28.166
1410	11.084		1096.4	47.311
1727.2	29.267		1325	19.568
2055.1	22.999		1556.9	26.811
2371.9	26.788		1594.6	32.131
1676	33.26		1587.1	33.229
1751.8	26.951		1922.2	28.224
1310.6	18.639		1130.2	28.544
1639.8	37.262		1352.1	34.309
1272.5	31.395		979.57	32.683
1755.4	26.941		858.28	17.549
1759.1	53.452		1158.5	21.577
1624.3	29.657		2332.1	33.912
2231.6	25.594		2578.5	29.654
1562.2	15.911		1537.7	27.804
1886.4	28.753		956.72	29.784
1092.2	15.11		796.09	40.336
1532.7	29.25		1075.1	40.256
2114.1	25.116		1308.3	19.67
2038.7	45.857		2290.9	29.812
2602.2	25.917		2714.7	44.81
2631.4	26.271		1112.8	44.95
1322.4	21.4		1330.4	36.734
1068.4	18.115		1911.8	27.744
751.12	28.486		2199.3	25.124
1127.9	22.725		2330.4	36.145
2003.1	30.058		1154.3	40.414
2188.3	20.801		1886.1	27.346
2027.3	25.629		2128	29.844
1129.5	11.844		1363.2	30.649
1357	19.9		1605.2	24.153
1342.6	25.985		1426.8	31.318
1712.5	36.025

## Sheet: F3-FS2-G-H
	Fluorescien in HeLa Cytoplasm			Fluorescien in HeLa Nucleus
Fluorescent signal (Conc.)	% of Recovery		Fluorescent signal (Conc.)	% of Recovery
1311.9	92.145		1156.1	88.824
1475.3	87.485		1359.4	91.234
1427.8	82.568		1450.6	95.713
1174.9	93.754		1047.3	94.758
1410	88.609		1096.4	84.953
1727.2	84.546		1325	88.103
2055.1	81.544		1556.9	85.344
2371.9	83.966		1594.6	84.648
1676	91.484		1587.1	93.961
1751.8	93.898		1922.2	86.484
1310.6	90.698		1130.2	89.531
1639.8	90.435		1352.1	80.818
1272.5	87.335		979.57	93.908
1755.4	92.57		858.28	88.417
1759.1	91.38		1158.5	95.714
1624.3	84.855		2332.1	93.332
2231.6	79.855		2578.5	94.274
1562.2	83.743		1537.7	92.79
1886.4	92.166		956.72	97.403
1092.2	80.553		796.09	87.439
1532.7	90.186		1075.1	89.454
2114.1	92.897		1308.3	85.637
2038.7	82.594		2290.9	92.006
2602.2	96.53		2714.7	90.886
2631.4	96.04		1112.8	90.798
1322.4	86.957		1330.4	92.98
1068.4	85.918		1911.8	93.874
751.12	79.403		2199.3	93.935
1127.9	76.759		2330.4	98.786
2003.1	91.065		1154.3	90.608
2188.3	84.9		1886.1	93.297
2027.3	86.894		2128	93.736
1129.5	95.99		1363.2	94.995
1357	84.321		1605.2	93.253
1342.6	93.367		1426.8	90.691
1712.5	90.601
