# Supplementary material for: Reversing protonation of weakly basic drugs greatly enhances intracellular diffusion and decreases lysosomal sequestration
Source: eLife. 2024 Dec 6;13:RP97255. doi: 10.7554/eLife.97255 (PMC11623935; doi:10.7554/eLife.97255)
Supplement: Figure 3—figure supplement 3—source data 1. [file elife-97255-fig3-figsupp3-data1.xlsx]

## Sheet: F3-FS3-A-B
Wavelength (nm)	8	7	6	5	4	3	2.5	2.2	2	pH Values
190	0.44964	0.47695	0.49229	0.37364	0.38969	0.39793	0.49223	0.3085	0.39325		UV spectrum of CF514 Dye
191	0.38712	0.50977	0.2868	0.30029	0.30742	0.44989	0.37764	0.33241	0.41489
192	0.403	0.40238	0.45366	0.42627	0.36952	0.66659	0.3289	0.38599	0.3759
193	0.84248	0.43888	0.61989	0.56611	0.53175	0.53217	0.77888	0.51581	0.40394
194	0.87964	0.6289	0.47559	0.70974	0.58157	0.7148	1.2783	0.60706	0.50981
195	0.33791	0.6276	0.46556	0.53453	0.44899	0.71079	0.76544	0.65461	0.48925
196	0.46935	0.53573	0.45702	0.41792	0.428	0.37399	0.3462	0.42087	0.39887
197	0.53303	0.67526	0.42431	0.5847	0.4114	0.61572	0.48528	0.50081	0.46906
198	0.51593	0.65832	0.38686	0.61624	0.79284	0.66032	0.43359	0.63482	0.44475
199	0.45814	0.53236	0.28158	0.52753	0.71836	0.60515	0.41161	0.52557	0.37355
200	0.35749	0.40266	0.52473	0.46857	0.57411	0.72484	0.43751	0.45894	0.38841
201	0.48368	0.60863	0.50902	0.49442	0.57747	0.60493	0.57471	0.55309	0.44669
202	0.62648	0.84689	0.54494	0.79576	0.6773	0.65533	0.72871	0.8318	0.66625
203	0.46769	0.66147	0.5112	0.52492	0.51087	0.62863	0.4809	0.49157	0.51596
204	0.47247	0.61685	0.58572	0.62101	0.45666	0.68006	0.57319	0.54174	0.42868
205	0.44078	0.5045	0.50428	0.50727	0.48104	0.57084	0.44787	0.4859	0.36759
206	0.42659	0.4671	0.50999	0.41613	0.44253	0.47607	0.39717	0.42073	0.34696
207	0.50971	0.56641	0.57968	0.47084	0.4957	0.56705	0.56899	0.47094	0.41992
208	0.568	0.62155	0.61854	0.52187	0.66066	0.61371	0.57125	0.51747	0.44457
209	0.50627	0.54698	0.5485	0.43696	0.59492	0.62124	0.57517	0.47011	0.40445
210	0.54539	0.58142	0.57837	0.53868	0.62751	0.64175	0.563	0.51033	0.44264
211	0.5091	0.60471	0.61476	0.48174	0.61447	0.5778	0.47708	0.45187	0.40253
212	0.56929	0.68604	0.57825	0.5686	0.64597	0.61059	0.56643	0.53281	0.43
213	0.5712	0.64137	0.59832	0.5049	0.61042	0.54902	0.55194	0.54734	0.42934
214	0.61523	0.64034	0.61622	0.46662	0.55998	0.58239	0.51174	0.5362	0.41075
215	0.58884	0.73665	0.61494	0.53794	0.63896	0.64116	0.58364	0.56203	0.45527
216	0.62177	0.70881	0.62152	0.53021	0.64854	0.64828	0.6223	0.574	0.45489
217	0.53874	0.60193	0.60132	0.50077	0.60218	0.60214	0.53895	0.50104	0.40358
218	0.59243	0.70514	0.67917	0.50317	0.63396	0.63363	0.57342	0.5373	0.45779
219	0.57148	0.68824	0.6055	0.50706	0.64694	0.62772	0.5891	0.5532	0.45107
220	0.61844	0.67271	0.63689	0.52459	0.65377	0.67329	0.60057	0.53902	0.48366
221	0.55933	0.63744	0.60682	0.49792	0.62203	0.60292	0.56053	0.5352	0.41863
222	0.58947	0.65927	0.66172	0.53751	0.66064	0.63047	0.59019	0.54928	0.46362
223	0.60529	0.67365	0.67047	0.52476	0.67141	0.64494	0.61816	0.55791	0.45841
224	0.6028	0.67177	0.66299	0.53213	0.66002	0.64998	0.59839	0.54814	0.45985
225	0.60968	0.66968	0.67421	0.5344	0.64978	0.65069	0.59223	0.54461	0.45053
226	0.57981	0.69015	0.64939	0.51518	0.63187	0.63074	0.59505	0.53902	0.44202
227	0.48007	0.61123	0.62309	0.46311	0.60621	0.59572	0.54109	0.50991	0.37727
228	0.30077	0.50337	0.55373	0.33348	0.52769	0.50068	0.44022	0.44358	0.23582
229	0.14245	0.35477	0.43468	0.1961	0.40433	0.36741	0.30956	0.32688	0.09024
230	0.1315	0.3172	0.39606	0.17615	0.36783	0.33924	0.28221	0.29179	0.079705
231	0.20692	0.36113	0.42337	0.23157	0.39821	0.3779	0.32652	0.32853	0.1449
232	0.29385	0.42016	0.46435	0.29981	0.44563	0.43132	0.38358	0.37587	0.22022
233	0.37496	0.47893	0.50796	0.36407	0.49241	0.4829	0.43841	0.42247	0.2877
234	0.4445	0.53295	0.54869	0.41977	0.53615	0.52892	0.48581	0.46323	0.34307
235	0.50444	0.58267	0.58766	0.4681	0.57565	0.56944	0.5266	0.49906	0.3883
236	0.55903	0.63002	0.62695	0.51286	0.61447	0.60727	0.56368	0.53176	0.42717
237	0.6093	0.67657	0.66665	0.55498	0.6524	0.64264	0.5978	0.56212	0.46069
238	0.65632	0.72255	0.70662	0.59542	0.69009	0.67633	0.6295	0.59066	0.49059
239	0.70061	0.76671	0.74631	0.63373	0.72659	0.70856	0.659	0.61781	0.51789
240	0.74331	0.8105	0.78574	0.67089	0.76303	0.74053	0.6886	0.64518	0.54413
241	0.78372	0.85251	0.82431	0.70556	0.79827	0.77135	0.71758	0.67217	0.56943
242	0.82087	0.89172	0.86044	0.73778	0.83139	0.8008	0.74505	0.69889	0.59394
243	0.85549	0.92885	0.89466	0.76743	0.86271	0.8292	0.77152	0.72441	0.61734
244	0.88758	0.96281	0.92616	0.79402	0.89103	0.85504	0.79515	0.74738	0.63794
245	0.91468	0.99151	0.95223	0.81581	0.91456	0.87488	0.81343	0.76491	0.65367
246	0.9339	1.0119	0.97009	0.82944	0.92992	0.88639	0.82313	0.77394	0.66228
247	0.94252	1.0201	0.9755	0.83206	0.93322	0.88725	0.82233	0.77268	0.66169
248	0.93706	1.0133	0.96625	0.8203	0.92243	0.8764	0.81063	0.76092	0.65217
249	0.91751	0.99031	0.94081	0.79336	0.89661	0.85379	0.78946	0.74028	0.63535
250	0.88502	0.95334	0.90046	0.75329	0.85781	0.82253	0.76165	0.71409	0.61365
251	0.84279	0.90565	0.84919	0.70323	0.80993	0.7856	0.72957	0.68411	0.58924
252	0.79604	0.85243	0.79293	0.64878	0.75677	0.74558	0.69494	0.65272	0.56322
253	0.74584	0.79575	0.7328	0.59078	0.70049	0.70283	0.65839	0.61879	0.53521
254	0.69663	0.74027	0.67364	0.53429	0.64537	0.66069	0.62145	0.58456	0.50662
255	0.64976	0.68723	0.61716	0.48077	0.59294	0.61956	0.58563	0.55063	0.4784
256	0.60659	0.6381	0.56488	0.4314	0.54422	0.58145	0.55168	0.51856	0.45172
257	0.5675	0.59359	0.51751	0.38682	0.50076	0.547	0.52137	0.48976	0.42741
258	0.53242	0.55389	0.47541	0.34774	0.46247	0.5168	0.49368	0.46359	0.40537
259	0.50137	0.51869	0.43801	0.31317	0.42841	0.48884	0.46829	0.43908	0.38445
260	0.47386	0.48756	0.40551	0.28319	0.39832	0.46173	0.4427	0.41346	0.3626
261	0.45003	0.46043	0.37711	0.25769	0.37183	0.43541	0.41584	0.3858	0.33855
262	0.42853	0.43611	0.35193	0.23542	0.34748	0.40734	0.38586	0.35479	0.31123
263	0.40907	0.41453	0.33002	0.21613	0.32539	0.37838	0.35374	0.32022	0.28072
264	0.39206	0.39499	0.3108	0.19995	0.30582	0.35029	0.32144	0.28493	0.24953
265	0.37707	0.37805	0.2942	0.18654	0.28942	0.32426	0.29079	0.25159	0.22009
266	0.36375	0.36314	0.2804	0.17574	0.27589	0.30166	0.26414	0.22252	0.1941
267	0.35201	0.35015	0.26866	0.16765	0.26527	0.28373	0.24288	0.19889	0.17292
268	0.34169	0.33875	0.25903	0.16155	0.25741	0.27042	0.22691	0.18105	0.15716
269	0.33262	0.32899	0.25101	0.15732	0.2522	0.26111	0.21567	0.1688	0.14594
270	0.32457	0.32003	0.24425	0.15466	0.24889	0.25541	0.20843	0.16063	0.13859
271	0.31682	0.31168	0.23838	0.15299	0.24716	0.25207	0.20442	0.156	0.13446
272	0.30876	0.30302	0.23235	0.15129	0.24567	0.2502	0.20217	0.15354	0.13221
273	0.29992	0.29348	0.22538	0.14873	0.24371	0.24878	0.20101	0.15229	0.13092
274	0.2896	0.28219	0.21707	0.14507	0.24062	0.24705	0.19965	0.15141	0.13007
275	0.27793	0.26969	0.2077	0.14037	0.2367	0.2452	0.19867	0.15063	0.12957
276	0.2656	0.2564	0.19729	0.13487	0.23207	0.24309	0.19743	0.1499	0.12901
277	0.25346	0.24312	0.18694	0.12916	0.22736	0.24075	0.19599	0.14908	0.12844
278	0.2415	0.23036	0.17705	0.12397	0.22291	0.23873	0.1949	0.1483	0.12798
279	0.23042	0.21847	0.16788	0.11949	0.21935	0.23711	0.19422	0.14789	0.1276
280	0.22026	0.20765	0.15984	0.11575	0.21623	0.23593	0.19367	0.1479	0.12778
281	0.21111	0.19792	0.15287	0.11289	0.21421	0.23542	0.19402	0.14841	0.1283
282	0.2033	0.18961	0.14707	0.11097	0.21308	0.23577	0.19491	0.14953	0.12935
283	0.19643	0.18262	0.14244	0.11011	0.21291	0.23667	0.19616	0.15122	0.13088
284	0.19078	0.17682	0.13897	0.10992	0.21358	0.23844	0.19831	0.15377	0.13316
285	0.18643	0.17191	0.13669	0.11082	0.21531	0.24107	0.20119	0.15662	0.13571
286	0.18281	0.1683	0.13502	0.11219	0.21789	0.24431	0.2045	0.15995	0.13883
287	0.18008	0.16561	0.134	0.11402	0.2206	0.24751	0.20797	0.16368	0.14174
288	0.17803	0.16363	0.1337	0.11633	0.22383	0.25112	0.21195	0.16738	0.14526
289	0.17704	0.16256	0.134	0.1192	0.22737	0.25514	0.21554	0.17166	0.1489
290	0.17606	0.16166	0.13469	0.12178	0.23094	0.25891	0.21954	0.17542	0.1523
291	0.17542	0.1612	0.13532	0.12453	0.23445	0.26274	0.22322	0.17927	0.15548
292	0.17545	0.16105	0.13645	0.12743	0.23805	0.26669	0.22737	0.18337	0.15908
293	0.17593	0.16137	0.13766	0.13029	0.24158	0.2705	0.23126	0.18719	0.16241
294	0.17649	0.16225	0.1392	0.13327	0.24528	0.27442	0.23495	0.19107	0.16575
295	0.17736	0.16339	0.14118	0.1364	0.24882	0.27809	0.23875	0.19484	0.16903
296	0.17867	0.16472	0.14316	0.1396	0.25245	0.28197	0.24256	0.19851	0.17235
297	0.18021	0.16671	0.14556	0.14303	0.2563	0.28587	0.2461	0.20199	0.17534
298	0.18231	0.16906	0.14838	0.1467	0.26024	0.28956	0.2499	0.2057	0.17854
299	0.18489	0.17165	0.15136	0.15048	0.26409	0.29353	0.25352	0.2091	0.18151
300	0.18739	0.17452	0.15467	0.15418	0.26833	0.29736	0.25673	0.21252	0.18457
301	0.19018	0.17775	0.15814	0.15822	0.27245	0.30075	0.26026	0.21596	0.18731
302	0.19291	0.18059	0.16124	0.16187	0.27615	0.3043	0.26367	0.21895	0.19003
303	0.19547	0.18346	0.1641	0.1652	0.27958	0.30753	0.26612	0.22155	0.19218
304	0.19809	0.18632	0.16716	0.16872	0.28283	0.31034	0.26884	0.22434	0.19442
305	0.20032	0.18865	0.1699	0.17144	0.28588	0.31287	0.27112	0.22658	0.19648
306	0.20231	0.19072	0.17186	0.17368	0.28848	0.31524	0.27354	0.22842	0.19817
307	0.20366	0.19234	0.17347	0.17574	0.29051	0.31707	0.27508	0.23029	0.1997
308	0.2047	0.19336	0.17455	0.17729	0.29176	0.31843	0.27642	0.23169	0.20066
309	0.20539	0.19421	0.17528	0.17831	0.29299	0.31957	0.27755	0.23244	0.20149
310	0.20568	0.19445	0.17571	0.17894	0.2935	0.31994	0.27765	0.23272	0.20187
311	0.20574	0.19457	0.17573	0.17933	0.29354	0.31987	0.27751	0.23263	0.20142
312	0.20596	0.19466	0.17592	0.17954	0.29383	0.31964	0.27695	0.23176	0.20069
313	0.20628	0.19489	0.17615	0.17999	0.2942	0.31918	0.27588	0.23056	0.19959
314	0.20674	0.19563	0.17698	0.18084	0.29459	0.31844	0.27451	0.22896	0.19835
315	0.20767	0.19644	0.1776	0.18169	0.29489	0.31731	0.27297	0.22673	0.19635
316	0.20898	0.19793	0.17908	0.18303	0.29595	0.31648	0.27119	0.22473	0.19435
317	0.21055	0.19969	0.18082	0.18491	0.29684	0.31552	0.26952	0.22236	0.19231
318	0.21202	0.20124	0.18239	0.18658	0.29818	0.31506	0.2678	0.22037	0.19018
319	0.21286	0.20232	0.18337	0.18764	0.29848	0.3139	0.26589	0.21778	0.18808
320	0.21313	0.20253	0.18351	0.1876	0.29844	0.31232	0.26373	0.21554	0.18571
321	0.21196	0.20117	0.18225	0.18648	0.29676	0.31028	0.26131	0.2129	0.18369
322	0.20886	0.19792	0.1787	0.18335	0.29337	0.30696	0.25808	0.20987	0.18088
323	0.20366	0.192	0.17288	0.17789	0.28796	0.30262	0.25433	0.20617	0.17758
324	0.19633	0.1837	0.16429	0.17026	0.28046	0.29677	0.24912	0.20149	0.17367
325	0.18652	0.17298	0.15324	0.16013	0.27029	0.28918	0.24278	0.19572	0.16867
326	0.17535	0.1604	0.14048	0.14815	0.25861	0.2804	0.23522	0.18866	0.16295
327	0.16324	0.14688	0.12668	0.13519	0.24575	0.27073	0.22638	0.18071	0.15601
328	0.15083	0.13291	0.11244	0.12198	0.23268	0.25986	0.2168	0.17154	0.14833
329	0.13902	0.11959	0.098739	0.10944	0.21975	0.2489	0.20662	0.1618	0.14015
330	0.12793	0.10724	0.086183	0.097669	0.2075	0.23778	0.19618	0.15175	0.13129
331	0.11833	0.096575	0.075157	0.087366	0.19688	0.22785	0.18625	0.14162	0.12254
332	0.11053	0.087661	0.065807	0.078998	0.1878	0.2186	0.17685	0.13206	0.11415
333	0.10388	0.080134	0.057994	0.071746	0.17976	0.20977	0.16781	0.12258	0.10642
334	0.098698	0.074441	0.05183	0.066228	0.17347	0.20242	0.15978	0.11442	0.09913
335	0.095061	0.069953	0.04704	0.061954	0.16872	0.19643	0.15347	0.10761	0.092906
336	0.092397	0.067073	0.044151	0.059427	0.16547	0.19169	0.14829	0.10213	0.087997
337	0.090849	0.065267	0.042147	0.057436	0.16304	0.18837	0.14421	0.097631	0.084158
338	0.090141	0.06441	0.041165	0.056681	0.16195	0.18598	0.14153	0.094247	0.08128
339	0.089794	0.063573	0.040299	0.056431	0.16113	0.18408	0.13922	0.091531	0.079015
340	0.090047	0.064269	0.040744	0.056824	0.16153	0.18324	0.13829	0.090296	0.077399
341	0.091057	0.0653	0.041461	0.057816	0.16214	0.18343	0.13756	0.089892	0.077281
342	0.092203	0.06655	0.04279	0.05915	0.16321	0.18419	0.13803	0.090008	0.077161
343	0.094348	0.068692	0.044815	0.061316	0.16534	0.18552	0.13944	0.091151	0.078053
344	0.096409	0.070731	0.047026	0.063879	0.16753	0.18725	0.14117	0.092634	0.079328
345	0.098412	0.073103	0.049109	0.065701	0.1697	0.18928	0.14273	0.09451	0.080904
346	0.10081	0.075771	0.051707	0.067952	0.17228	0.19147	0.14492	0.09634	0.082696
347	0.10343	0.07898	0.054882	0.07133	0.1755	0.19428	0.14763	0.09938	0.085128
348	0.10625	0.081965	0.057861	0.074479	0.17867	0.19757	0.15056	0.10214	0.087633
349	0.10897	0.085252	0.060995	0.077563	0.18199	0.20078	0.15389	0.10507	0.090439
350	0.11252	0.089046	0.064729	0.081137	0.18575	0.20406	0.15727	0.1086	0.09332
351	0.11604	0.09264	0.06844	0.084755	0.18972	0.20749	0.16061	0.11212	0.096262
352	0.11924	0.096388	0.072065	0.088328	0.19334	0.21141	0.16372	0.1154	0.099159
353	0.12279	0.10044	0.075934	0.092184	0.1969	0.21481	0.16705	0.11868	0.10199
354	0.12625	0.10414	0.079813	0.095938	0.201	0.2179	0.17034	0.12148	0.10435
355	0.13037	0.10842	0.084368	0.10022	0.20553	0.2218	0.17379	0.12473	0.10697
356	0.1337	0.11214	0.088224	0.10388	0.20853	0.22393	0.17549	0.12645	0.10849
357	0.13718	0.11644	0.092332	0.10787	0.21237	0.22611	0.17784	0.12849	0.11021
358	0.14126	0.1207	0.09666	0.11212	0.21616	0.229	0.17959	0.13013	0.11106
359	0.14581	0.12522	0.10101	0.11634	0.22086	0.23154	0.18127	0.13114	0.11174
360	0.14951	0.12969	0.10485	0.12045	0.22441	0.23305	0.18161	0.13179	0.11162
361	0.1535	0.13406	0.11001	0.12508	0.22805	0.2344	0.18228	0.13102	0.11175
362	0.15686	0.13842	0.11443	0.1289	0.23074	0.23498	0.18159	0.13038	0.11069
363	0.16034	0.14245	0.1191	0.13259	0.23365	0.23512	0.18053	0.12882	0.10881
364	0.16422	0.14684	0.12344	0.13688	0.2385	0.23703	0.17971	0.12684	0.10662
365	0.16981	0.15124	0.12743	0.14128	0.24448	0.23898	0.17987	0.12472	0.10511
366	0.17413	0.15564	0.1315	0.14491	0.24773	0.23891	0.17792	0.12165	0.10203
367	0.17648	0.1599	0.13665	0.14953	0.24957	0.23671	0.17429	0.11835	0.098976
368	0.18015	0.16422	0.14136	0.15296	0.25152	0.2348	0.17137	0.11452	0.095371
369	0.18419	0.16842	0.14561	0.15678	0.2544	0.23351	0.16847	0.11067	0.091866
370	0.18719	0.17235	0.14869	0.16054	0.25607	0.23154	0.16503	0.10638	0.087894
371	0.1899	0.17598	0.15203	0.16429	0.25807	0.22967	0.16152	0.10224	0.084248
372	0.19312	0.17936	0.15502	0.16734	0.26016	0.22806	0.15868	0.098211	0.080764
373	0.1964	0.18239	0.15846	0.17011	0.26241	0.22659	0.15572	0.094897	0.077255
374	0.19807	0.18533	0.16176	0.17271	0.26289	0.22408	0.15172	0.091463	0.073973
375	0.20059	0.18784	0.16392	0.17456	0.265	0.22339	0.15004	0.087515	0.0706
376	0.2035	0.1906	0.16646	0.17706	0.26882	0.22409	0.14874	0.084439	0.068018
377	0.20556	0.1925	0.16917	0.17951	0.2705	0.22379	0.14703	0.082016	0.06541
378	0.20753	0.19456	0.17134	0.18142	0.27219	0.22298	0.14469	0.079879	0.062959
379	0.2084	0.19605	0.17349	0.18278	0.27295	0.22227	0.1429	0.077384	0.061013
380	0.20899	0.1975	0.17548	0.18358	0.27222	0.21966	0.14052	0.075116	0.059128
381	0.2102	0.19796	0.17631	0.18441	0.27323	0.21913	0.13931	0.073395	0.057395
382	0.21137	0.19947	0.17693	0.18625	0.27431	0.21869	0.13858	0.072103	0.056018
383	0.21253	0.2002	0.1772	0.18737	0.27543	0.21843	0.13739	0.070413	0.054728
384	0.21315	0.20155	0.17769	0.18842	0.27562	0.2186	0.13682	0.069841	0.053699
385	0.21387	0.20212	0.17846	0.18934	0.27655	0.21833	0.13564	0.068531	0.053103
386	0.21521	0.20247	0.17946	0.18959	0.27722	0.21794	0.13511	0.067519	0.051814
387	0.21456	0.203	0.17997	0.19059	0.27648	0.21625	0.13371	0.06637	0.050966
388	0.21539	0.20341	0.18036	0.19002	0.27653	0.21569	0.13303	0.065023	0.04995
389	0.21548	0.20397	0.18053	0.19029	0.27624	0.21441	0.13197	0.063854	0.048924
390	0.21419	0.20367	0.18019	0.19017	0.27477	0.2124	0.1303	0.062621	0.048052
391	0.21367	0.20306	0.17963	0.18971	0.27376	0.21073	0.12877	0.061411	0.04669
392	0.21352	0.20301	0.17885	0.18917	0.27331	0.21014	0.12807	0.060878	0.045914
393	0.21237	0.20245	0.17772	0.18828	0.27148	0.20845	0.12664	0.059784	0.044948
394	0.21015	0.20151	0.17702	0.18707	0.2679	0.20518	0.12383	0.058721	0.043853
395	0.20954	0.19987	0.17552	0.18551	0.26741	0.20465	0.12347	0.057584	0.043236
396	0.20849	0.19767	0.17338	0.18375	0.26716	0.20529	0.12337	0.056856	0.042365
397	0.20636	0.19492	0.17055	0.18177	0.26581	0.20428	0.12251	0.055513	0.041259
398	0.20447	0.19281	0.16722	0.17928	0.26444	0.20437	0.12245	0.054551	0.040884
399	0.20173	0.18923	0.1642	0.17616	0.26204	0.20215	0.12052	0.053497	0.039698
400	0.19752	0.18477	0.16042	0.17206	0.25771	0.20041	0.11887	0.052445	0.038728
401	0.19458	0.18025	0.15518	0.16831	0.25473	0.19879	0.11774	0.051485	0.038095
402	0.18976	0.17523	0.14997	0.16283	0.2497	0.19555	0.11617	0.049871	0.037127
403	0.18491	0.1695	0.14438	0.15833	0.24495	0.1929	0.11431	0.048973	0.036237
404	0.17941	0.164	0.13804	0.15317	0.24011	0.19122	0.11306	0.047704	0.035408
405	0.17511	0.15839	0.13208	0.14749	0.23664	0.18941	0.11237	0.046483	0.034566
406	0.17018	0.15217	0.12545	0.14229	0.23328	0.18823	0.11135	0.045505	0.033857
407	0.16399	0.14552	0.11817	0.13602	0.22623	0.18442	0.10843	0.044335	0.032707
408	0.15836	0.1392	0.1116	0.13027	0.22027	0.1818	0.10688	0.043756	0.032295
409	0.15256	0.13227	0.10428	0.12409	0.21513	0.17877	0.10526	0.042134	0.03148
410	0.14636	0.12564	0.097684	0.11741	0.20883	0.17561	0.10285	0.040651	0.030769
411	0.13993	0.11925	0.090747	0.11067	0.20212	0.17203	0.10085	0.039483	0.029553
412	0.13468	0.11338	0.084801	0.1048	0.19675	0.16862	0.099411	0.038406	0.029046
413	0.12918	0.10698	0.078969	0.098424	0.19131	0.16559	0.097349	0.037224	0.027827
414	0.1233	0.10139	0.073536	0.092786	0.18566	0.16182	0.09556	0.036171	0.02702
415	0.11849	0.095741	0.06807	0.087782	0.18049	0.15969	0.094186	0.035663	0.026496
416	0.11458	0.091228	0.063172	0.08302	0.17646	0.15738	0.092909	0.034764	0.025855
417	0.10989	0.086241	0.058242	0.078956	0.17186	0.15513	0.091561	0.03388	0.02571
418	0.10678	0.082561	0.053946	0.074567	0.16903	0.15368	0.090836	0.033592	0.025326
419	0.10313	0.078166	0.049686	0.070974	0.16497	0.15147	0.089251	0.032518	0.024421
420	0.10015	0.07514	0.046429	0.068343	0.16205	0.15026	0.089059	0.032902	0.024694
421	0.097389	0.072492	0.043285	0.065592	0.16007	0.14905	0.088649	0.032482	0.024334
422	0.095766	0.069767	0.040779	0.063015	0.15828	0.14884	0.088453	0.032159	0.024239
423	0.09343	0.067944	0.038673	0.061147	0.15548	0.14689	0.087425	0.03214	0.024123
424	0.092496	0.066325	0.037697	0.05999	0.15474	0.14699	0.087823	0.032912	0.024851
425	0.091146	0.0653	0.036159	0.05854	0.15341	0.14628	0.08749	0.032954	0.025252
426	0.090128	0.064371	0.035496	0.057734	0.15214	0.14593	0.087686	0.033279	0.025498
427	0.089983	0.063905	0.034449	0.057288	0.15207	0.14642	0.088734	0.03449	0.0262
428	0.089934	0.06416	0.034623	0.057392	0.15262	0.14704	0.089507	0.035056	0.026949
429	0.089907	0.06454	0.03515	0.05782	0.15217	0.14684	0.089544	0.036074	0.028089
430	0.090722	0.065347	0.035388	0.058341	0.15347	0.1485	0.090933	0.03713	0.028811
431	0.092176	0.0666	0.037185	0.05948	0.1549	0.14981	0.091936	0.038199	0.02976
432	0.093303	0.068079	0.038801	0.060936	0.15615	0.15111	0.093598	0.03943	0.031318
433	0.094472	0.070209	0.040227	0.063307	0.15725	0.15204	0.094436	0.041659	0.032539
434	0.097703	0.072226	0.042296	0.065063	0.16116	0.15572	0.097081	0.042632	0.03378
435	0.099729	0.074886	0.045439	0.067736	0.16351	0.15736	0.098807	0.044233	0.034834
436	0.10238	0.07873	0.049146	0.070324	0.16572	0.15846	0.10078	0.04645	0.036561
437	0.10531	0.081752	0.052757	0.073287	0.1694	0.1615	0.1026	0.047836	0.038034
438	0.10862	0.085184	0.056796	0.076532	0.17275	0.16412	0.1046	0.050116	0.039567
439	0.11264	0.089356	0.06132	0.081572	0.1773	0.16769	0.10675	0.052299	0.041485
440	0.11568	0.093413	0.066002	0.085011	0.17968	0.16916	0.10823	0.054574	0.042981
441	0.12029	0.098101	0.070387	0.088916	0.18473	0.17302	0.11202	0.05655	0.044875
442	0.12396	0.10304	0.075398	0.092644	0.18868	0.1761	0.1145	0.058826	0.047388
443	0.12711	0.10829	0.080623	0.098664	0.19032	0.17591	0.11508	0.061855	0.048897
444	0.13304	0.11341	0.085549	0.10424	0.19769	0.18206	0.11948	0.064716	0.05132
445	0.13967	0.11915	0.090668	0.11012	0.20601	0.18865	0.12466	0.068096	0.054475
446	0.14584	0.12526	0.096199	0.11592	0.2127	0.19455	0.12894	0.071023	0.057265
447	0.15034	0.13137	0.10239	0.12158	0.218	0.19866	0.13229	0.074304	0.060002
448	0.15603	0.1379	0.10892	0.12739	0.22374	0.20284	0.13622	0.078321	0.063455
449	0.16169	0.1439	0.11548	0.13318	0.23004	0.20768	0.14029	0.082034	0.066521
450	0.16757	0.15062	0.12217	0.13949	0.23647	0.21323	0.14469	0.086369	0.070085
451	0.17349	0.15724	0.12895	0.14572	0.24339	0.21832	0.14939	0.090646	0.073655
452	0.1805	0.16397	0.13573	0.15236	0.25005	0.22424	0.15488	0.09564	0.077967
453	0.18628	0.17061	0.14281	0.15894	0.25654	0.23002	0.15989	0.10044	0.081979
454	0.19215	0.17755	0.14943	0.16516	0.26333	0.2358	0.16482	0.10539	0.086309
455	0.19952	0.18539	0.15743	0.17268	0.27134	0.24227	0.1708	0.11114	0.091275
456	0.20589	0.19274	0.16517	0.17968	0.27868	0.24889	0.17665	0.11665	0.096129
457	0.21347	0.20121	0.17392	0.18827	0.28657	0.25527	0.18349	0.12301	0.10153
458	0.2212	0.20981	0.18275	0.19624	0.29539	0.2631	0.19017	0.12951	0.10718
459	0.22931	0.2191	0.19241	0.20503	0.30413	0.27037	0.19698	0.13629	0.11244
460	0.23838	0.2288	0.20249	0.21462	0.3137	0.27843	0.20382	0.14298	0.11835
461	0.24793	0.2392	0.21352	0.22457	0.32422	0.28689	0.2114	0.1498	0.12421
462	0.25852	0.25158	0.22584	0.23587	0.33608	0.2963	0.21975	0.15762	0.13044
463	0.27049	0.26511	0.23946	0.24854	0.34838	0.3055	0.22803	0.16561	0.13762
464	0.28308	0.27927	0.25351	0.26192	0.36116	0.31549	0.23648	0.17327	0.14431
465	0.29588	0.29326	0.26896	0.27597	0.3742	0.32515	0.24452	0.18088	0.15044
466	0.31012	0.30909	0.2844	0.2907	0.38931	0.33579	0.2538	0.18879	0.15699
467	0.32457	0.32638	0.30316	0.30685	0.40476	0.34627	0.26255	0.1972	0.16372
468	0.34215	0.34583	0.32242	0.3246	0.42221	0.35882	0.27227	0.20544	0.1714
469	0.35784	0.36458	0.342	0.34171	0.4386	0.3692	0.28072	0.21287	0.17737
470	0.37493	0.38498	0.36367	0.36032	0.45563	0.3802	0.28918	0.22177	0.18407
471	0.39453	0.40564	0.38581	0.38075	0.47511	0.3934	0.30024	0.23035	0.19079
472	0.41507	0.4278	0.40813	0.40225	0.49492	0.40781	0.3109	0.23994	0.19843
473	0.43582	0.45004	0.42976	0.42395	0.51689	0.42281	0.32246	0.24921	0.206
474	0.45693	0.47284	0.45155	0.44535	0.5398	0.43801	0.3342	0.25852	0.21438
475	0.47771	0.49562	0.47436	0.4683	0.56207	0.45352	0.34571	0.26857	0.22347
476	0.49815	0.5166	0.49703	0.48948	0.58501	0.47001	0.35839	0.27767	0.23034
477	0.51637	0.53781	0.51802	0.50994	0.60195	0.48055	0.36757	0.28787	0.23768
478	0.5335	0.55839	0.5404	0.52884	0.61941	0.49319	0.37825	0.29779	0.24706
479	0.55215	0.57857	0.56238	0.54595	0.63737	0.50677	0.39077	0.30846	0.25684
480	0.56811	0.59922	0.5819	0.56463	0.65548	0.52078	0.40273	0.32092	0.26673
481	0.58502	0.61662	0.60044	0.58226	0.67263	0.53427	0.41596	0.33391	0.27816
482	0.59966	0.63255	0.61759	0.5975	0.68887	0.54988	0.43004	0.34774	0.28942
483	0.61426	0.64906	0.63358	0.61253	0.70461	0.5636	0.44317	0.36154	0.30242
484	0.62641	0.66391	0.64707	0.62749	0.71812	0.57806	0.45888	0.37813	0.31666
485	0.63952	0.6804	0.66409	0.6462	0.73159	0.59121	0.47506	0.39844	0.3335
486	0.65442	0.69268	0.67612	0.65654	0.75122	0.61325	0.49439	0.41317	0.34753
487	0.65338	0.69676	0.68472	0.66435	0.75073	0.61573	0.49823	0.42577	0.35663
488	0.66592	0.70875	0.6939	0.66974	0.76841	0.64019	0.52434	0.44677	0.37745
489	0.67571	0.71892	0.70421	0.67951	0.78104	0.65667	0.54331	0.46715	0.39467
490	0.68607	0.73003	0.71588	0.69047	0.79539	0.67621	0.56355	0.48852	0.41402
491	0.69404	0.74023	0.72586	0.70042	0.80644	0.69259	0.58304	0.50881	0.43266
492	0.70581	0.75305	0.73762	0.71217	0.82127	0.71111	0.60356	0.53088	0.45185
493	0.71986	0.76692	0.75382	0.72581	0.83771	0.73195	0.62482	0.5544	0.47194
494	0.73323	0.7836	0.76961	0.74171	0.85541	0.753	0.64703	0.57687	0.49223
495	0.74985	0.80258	0.79086	0.76122	0.87718	0.77556	0.66986	0.60008	0.51196
496	0.77152	0.82535	0.81432	0.781	0.89952	0.79837	0.69301	0.62301	0.53298
497	0.79337	0.84958	0.83902	0.80479	0.92336	0.8203	0.71412	0.64379	0.55082
498	0.81793	0.87781	0.86725	0.8303	0.94913	0.84296	0.73641	0.66532	0.57009
499	0.84881	0.90995	0.90078	0.86238	0.97972	0.86881	0.75893	0.68796	0.58927
500	0.87896	0.9442	0.93512	0.89507	1.0122	0.89404	0.78009	0.70758	0.60539
501	0.91206	0.98111	0.9726	0.93171	1.0477	0.91826	0.79995	0.72633	0.62118
502	0.94988	1.0222	1.0128	0.96553	1.0818	0.94327	0.82058	0.74318	0.63394
503	0.99034	1.0686	1.0579	1.0069	1.1243	0.97045	0.84058	0.75913	0.64764
504	1.0316	1.1113	1.1019	1.0491	1.1655	0.99596	0.85952	0.77347	0.65864
505	1.0727	1.1559	1.1466	1.091	1.2067	1.0196	0.87319	0.78455	0.66746
506	1.1074	1.1985	1.184	1.1267	1.2369	1.0376	0.88468	0.79301	0.67414
507	1.1514	1.2427	1.2317	1.1715	1.2783	1.0597	0.9003	0.80292	0.6813
508	1.1951	1.2913	1.2739	1.2142	1.3202	1.0842	0.91482	0.81279	0.68677
509	1.2291	1.3231	1.3177	1.247	1.3594	1.108	0.92528	0.81892	0.69228
510	1.2594	1.3631	1.3422	1.2837	1.3866	1.1271	0.93544	0.8239	0.69546
511	1.2975	1.3955	1.3896	1.3165	1.4165	1.144	0.94798	0.83045	0.70135
512	1.3178	1.4274	1.4096	1.3398	1.4366	1.154	0.95362	0.83379	0.70623
513	1.3446	1.4466	1.4445	1.3693	1.4654	1.1662	0.96391	0.84257	0.71045
514	1.3685	1.4758	1.4684	1.3907	1.488	1.1824	0.9749	0.85041	0.7177
515	1.3804	1.4888	1.4781	1.4019	1.5018	1.1932	0.9833	0.86017	0.72416
516	1.383	1.4928	1.4813	1.41	1.5075	1.2003	0.99272	0.86912	0.73386
517	1.3876	1.4964	1.4865	1.4141	1.5178	1.2115	1.0045	0.882	0.74545
518	1.375	1.4835	1.4698	1.4008	1.5054	1.216	1.0134	0.89515	0.7579
519	1.3552	1.4676	1.4529	1.3775	1.5006	1.2195	1.024	0.90976	0.77167
520	1.3266	1.429	1.4184	1.3478	1.4643	1.2163	1.0328	0.92472	0.78733
521	1.289	1.3896	1.3753	1.3136	1.432	1.2118	1.0436	0.94376	0.80598
522	1.2485	1.3461	1.3291	1.2723	1.4022	1.2103	1.0573	0.96565	0.82619
523	1.1973	1.2943	1.2818	1.2246	1.3627	1.2058	1.0724	0.98888	0.84941
524	1.1403	1.2314	1.2143	1.1627	1.3142	1.199	1.083	1.011	0.87351
525	1.0786	1.1636	1.1528	1.1017	1.2614	1.1973	1.0982	1.0381	0.90144
526	1.0121	1.094	1.0756	1.0353	1.2065	1.1871	1.1149	1.0677	0.93032
527	0.94771	1.0167	1.003	0.96691	1.1504	1.1821	1.1311	1.1004	0.96199
528	0.87145	0.93543	0.92047	0.8914	1.0845	1.1715	1.1471	1.125	0.99083
529	0.80319	0.85966	0.84361	0.82142	1.0277	1.1695	1.1679	1.1636	1.0249
530	0.73375	0.78292	0.76681	0.75003	0.96706	1.1644	1.1855	1.1939	1.0555
531	0.66581	0.70722	0.69008	0.67894	0.9087	1.1633	1.2066	1.2281	1.0866
532	0.60084	0.63469	0.6171	0.61276	0.85178	1.1592	1.228	1.2594	1.1217
533	0.53936	0.56713	0.54765	0.54893	0.80149	1.1585	1.2481	1.2932	1.1538
534	0.48313	0.50359	0.48343	0.49002	0.75477	1.1596	1.2689	1.3228	1.1837
535	0.42998	0.44558	0.42442	0.43617	0.70699	1.1545	1.2813	1.345	1.2047
536	0.38353	0.39571	0.37329	0.38776	0.66951	1.1547	1.2946	1.3713	1.2287
537	0.34184	0.34749	0.32494	0.34223	0.63349	1.1549	1.3107	1.3873	1.2486
538	0.30268	0.30217	0.27812	0.30146	0.60136	1.1551	1.3257	1.4113	1.2684
539	0.26736	0.26313	0.23756	0.26481	0.56926	1.1493	1.3289	1.4194	1.2787
540	0.23641	0.22878	0.20165	0.23227	0.54021	1.1409	1.3304	1.4286	1.2848
541	0.2088	0.19796	0.16979	0.20333	0.514	1.1283	1.3249	1.4218	1.2825
542	0.1855	0.17173	0.14264	0.17809	0.48964	1.1112	1.3101	1.4092	1.2717
543	0.16468	0.14855	0.11873	0.15576	0.4664	1.0895	1.289	1.387	1.2542
544	0.14696	0.12867	0.097984	0.13675	0.44403	1.0636	1.2613	1.3633	1.2293
545	0.13167	0.11128	0.079899	0.11961	0.42285	1.0336	1.2288	1.3291	1.1973
546	0.11869	0.096984	0.064478	0.10515	0.40238	0.9981	1.1882	1.2848	1.1573
547	0.10705	0.084234	0.050619	0.091973	0.38229	0.95929	1.1419	1.2367	1.1151
548	0.097822	0.073602	0.039098	0.081001	0.36382	0.91886	1.0938	1.1805	1.063
549	0.089114	0.064183	0.028985	0.070883	0.34449	0.87139	1.0347	1.117	1.0055
550	0.082765	0.056206	0.020358	0.062346	0.32614	0.82334	0.97532	1.0499	0.94464
551	0.077179	0.049155	0.012777	0.054783	0.30813	0.77346	0.91189	0.97884	0.88041
552	0.072573	0.0431	0.0063653	0.048987	0.29116	0.72348	0.84764	0.90874	0.81535
553	0.068377	0.038191	0.0015402	0.043619	0.2756	0.67628	0.78672	0.837	0.75141
554	0.064172	0.033804	-0.0029244	0.038299	0.25902	0.62666	0.72255	0.76582	0.68744
555	0.061144	0.029981	-0.0073428	0.033797	0.2437	0.57761	0.6606	0.69535	0.6242
556	0.058866	0.027094	-0.011494	0.029943	0.22908	0.53174	0.60148	0.62722	0.56297
557	0.054677	0.024837	-0.013653	0.026134	0.21293	0.48548	0.5439	0.5639	0.50575
558	0.052836	0.022188	-0.015241	0.021807	0.20264	0.44828	0.49482	0.50714	0.45446
559	0.051889	0.019396	-0.017699	0.018656	0.19414	0.41371	0.44781	0.45052	0.40472
560	0.049947	0.017632	-0.020783	0.016837	0.18238	0.37789	0.40114	0.39851	0.35755
561	0.048118	0.016492	-0.022435	0.01459	0.17177	0.3447	0.35933	0.35176	0.31487
562	0.045903	0.014844	-0.024618	0.011331	0.16209	0.31509	0.32135	0.30853	0.27622
563	0.045006	0.013669	-0.025814	0.0096927	0.15443	0.28892	0.28756	0.26963	0.24128
564	0.044221	0.012739	-0.027031	0.0087771	0.14798	0.26661	0.25834	0.23554	0.21071
565	0.043465	0.011671	-0.028486	0.0079432	0.14251	0.24674	0.23162	0.20505	0.18306
566	0.043509	0.011233	-0.030253	0.0081229	0.13854	0.2303	0.2093	0.17834	0.15927
567	0.043643	0.010653	-0.031716	0.0080686	0.13518	0.21579	0.18944	0.15474	0.13826
568	0.042924	0.010097	-0.032157	0.0068445	0.13119	0.20229	0.17176	0.13437	0.11997
569	0.041839	0.0094848	-0.031957	0.0053473	0.12565	0.18803	0.15508	0.11622	0.1035
570	0.040657	0.0087891	-0.031696	0.0039139	0.12065	0.17568	0.14043	0.1007	0.088998
571	0.039929	0.0083299	-0.031996	0.0032716	0.1168	0.1655	0.12805	0.08745	0.076552
572	0.039674	0.0077243	-0.032126	0.0027499	0.11526	0.15861	0.1185	0.075743	0.066263
573	0.038613	0.0073547	-0.032469	0.0021639	0.11125	0.14957	0.10844	0.065383	0.056463
574	0.038629	0.0070763	-0.03272	0.0021582	0.10996	0.14434	0.10119	0.057088	0.048751
575	0.038281	0.0065098	-0.032968	0.0016961	0.1083	0.13942	0.094663	0.049471	0.041933
576	0.037762	0.0062637	-0.033167	0.001327	0.10639	0.13447	0.08885	0.043051	0.035911
577	0.038051	0.0062461	-0.033627	0.0014353	0.10546	0.13078	0.084188	0.037631	0.031177
578	0.037789	0.0059338	-0.033438	0.0014276	0.10438	0.12774	0.079982	0.033004	0.026874
579	0.03718	0.0056734	-0.033763	0.00081921	0.10335	0.12502	0.076396	0.028927	0.023152
580	0.037264	0.0056119	-0.034188	0.00038862	0.10276	0.12276	0.073612	0.025362	0.02004
581	0.037092	0.0054793	-0.034621	0.00073099	0.10099	0.11937	0.070491	0.02253	0.017466
582	0.036906	0.0051808	-0.034048	0.0009017	0.1013	0.11889	0.068302	0.019804	0.014826
583	0.036349	0.0049639	-0.034157	-0.00014353	0.10097	0.11772	0.066532	0.017442	0.012829
584	0.036458	0.0048866	-0.035178	-0.00081015	0.10047	0.11614	0.065475	0.015548	0.011314
585	0.036907	0.0049477	-0.035128	-0.00025177	0.10077	0.11566	0.064205	0.014124	0.010017
586	0.036391	0.0046673	-0.035011	-0.00056982	0.10015	0.11451	0.062681	0.012485	0.0083351
587	0.035883	0.0045562	-0.035089	-0.00076246	0.099159	0.11291	0.061326	0.011354	0.0074239
588	0.037059	0.004499	-0.035492	-0.00078297	0.1012	0.11457	0.061841	0.010176	0.0065246
589	0.036394	0.004458	-0.035954	-0.0012498	0.10021	0.11326	0.060764	0.0092669	0.0057034
590	0.035797	0.0042953	-0.03613	-0.0018206	0.099859	0.11266	0.059789	0.0082488	0.0049653
591	0.035835	0.0040855	-0.036025	-0.0023651	0.099924	0.11255	0.059568	0.0072985	0.0041714
592	0.035354	0.0042787	-0.036222	-0.0021582	0.098268	0.11031	0.058302	0.0071387	0.0037651
593	0.036056	0.0040331	-0.036221	-0.0017018	0.099129	0.11114	0.058234	0.0066099	0.0034714
594	0.036433	0.0041933	-0.036464	-0.0011435	0.099961	0.11164	0.058124	0.006484	0.003098
595	0.037967	0.0044942	-0.037187	4.9591e-05	0.10183	0.11354	0.059183	0.0064831	0.0031385
596	0.037804	0.0042982	-0.036831	0.00077105	0.10229	0.11408	0.058706	0.0059533	0.0025454
597	0.037889	0.0045123	-0.037523	0.00085211	0.10351	0.11514	0.059558	0.0051241	0.0031037
598	0.03738	0.0045156	-0.037618	0.0009265	0.10265	0.11413	0.059171	0.0047216	0.0030522
599	0.036506	0.0044174	-0.037382	0.00070715	0.1007	0.1121	0.057534	0.0046496	0.0023336
600	0.036108	0.0042753	-0.03689	-0.00021219	0.099902	0.11117	0.057014	0.0042496	0.0018749
601	0.03568	0.0038462	-0.036734	-0.0014067	0.099256	0.11014	0.056587	0.0037189	0.001389
602	0.034925	0.0039182	-0.036131	-0.002459	0.097689	0.10867	0.05564	0.0036626	0.0011835
603	0.034891	0.0038939	-0.036163	-0.0024505	0.097141	0.10795	0.055271	0.0036316	0.001019
604	0.034592	0.0036621	-0.036246	-0.0026884	0.096861	0.10772	0.054963	0.0033307	0.00044441
605	0.034367	0.0035801	-0.03651	-0.0028362	0.096786	0.10725	0.054708	0.0031986	0.00037956
606	0.034715	0.0037317	-0.036481	-0.0024905	0.097255	0.10791	0.054962	0.0032029	0.00038862
607	0.03428	0.00349	-0.036529	-0.0026364	0.096605	0.10706	0.05445	0.0028372	0.00013018
608	0.034388	0.0036345	-0.036573	-0.0028276	0.097151	0.10774	0.054636	0.0027137	0.00015211
609	0.034245	0.0035596	-0.036694	-0.0029798	0.096961	0.10729	0.054539	0.0025954	9.9659e-05
610	0.034186	0.0035939	-0.036649	-0.0027804	0.096509	0.10695	0.054319	0.0025964	4.9591e-05
611	0.034286	0.0036011	-0.036627	-0.0028167	0.096883	0.10734	0.054283	0.0024261	5.6744e-05
612	0.03389	0.0035386	-0.036767	-0.0029373	0.096591	0.10674	0.054084	0.0022497	-8.9168e-05
613	0.033949	0.0035415	-0.036877	-0.0031142	0.096836	0.10704	0.054202	0.0021629	1.2398e-05
614	0.033962	0.0035734	-0.036911	-0.003037	0.096676	0.10695	0.054081	0.0021677	-6.0558e-05
615	0.03383	0.0036097	-0.036755	-0.003005	0.096289	0.10656	0.053899	0.0019174	-0.00014639
616	0.033825	0.0034208	-0.036665	-0.0031371	0.096622	0.10696	0.054031	0.0019622	-0.00039101
617	0.033906	0.0036025	-0.036924	-0.0032725	0.096803	0.10692	0.054306	0.0017943	-0.00023222
618	0.033811	0.0034704	-0.037104	-0.0032172	0.096853	0.10702	0.054011	0.0016451	-0.00033426
619	0.03359	0.0034065	-0.037059	-0.0034184	0.096559	0.10679	0.053969	0.0016332	-0.00031424
620	0.033903	0.0035262	-0.037156	-0.0032716	0.097088	0.10736	0.05424	0.0015926	-0.00036764
621	0.033885	0.003551	-0.037211	-0.0033927	0.097133	0.10742	0.054273	0.0015287	-0.00024509
622	0.033762	0.0036292	-0.037118	-0.0033646	0.096817	0.10705	0.054081	0.0014672	-0.00038815
623	0.034205	0.0036826	-0.037231	-0.0033116	0.09731	0.10746	0.054443	0.0015359	-0.00028944
624	0.033671	0.0033774	-0.037488	-0.0034289	0.096813	0.10687	0.053844	0.0014219	-0.00039768
625	0.033575	0.0032949	-0.037583	-0.0037174	0.096716	0.10663	0.053648	0.0012445	-0.00084734
626	0.033378	0.0031848	-0.037898	-0.0045533	0.096322	0.10658	0.053693	0.00092268	-0.00076055
627	0.032721	0.0030489	-0.038383	-0.0051298	0.095275	0.10542	0.053177	0.00079775	-0.00099373
628	0.032195	0.0030675	-0.038213	-0.0054526	0.094842	0.10481	0.052709	0.00074625	-0.0013018
629	0.033081	0.0033174	-0.03814	-0.0046906	0.09625	0.10642	0.053403	0.0010109	-0.0013728
630	0.035297	0.0033441	-0.038212	-0.0034208	0.10037	0.11061	0.055843	0.0013967	-0.0008173
631	0.034336	0.0034881	-0.038606	-0.0036092	0.09923	0.10955	0.055548	0.00057268	-0.0006094
632	0.031584	0.00278	-0.037838	-0.0065269	0.095463	0.10534	0.053298	-0.0001111	-0.0012674
633	0.030153	0.0027356	-0.036997	-0.0092525	0.092903	0.10273	0.051674	-0.00033712	-0.0018826
634	0.029955	0.0029969	-0.03707	-0.0078492	0.092566	0.1024	0.051134	-0.00013876	-0.001935
635	0.031764	0.0030575	-0.037327	-0.0058823	0.095024	0.1049	0.052587	5.6267e-05	-0.0015202
636	0.033877	0.0035563	-0.037373	-0.0038419	0.098279	0.10817	0.054632	0.00059271	-0.00066471
637	0.034899	0.0035233	-0.038573	-0.0031261	0.099879	0.1101	0.055704	0.00079727	-0.0004549
638	0.035102	0.0034089	-0.039549	-0.0032487	0.099784	0.11006	0.055756	0.00078678	-0.00032234
639	0.034912	0.0038123	-0.039352	-0.0025353	0.098866	0.10913	0.055573	0.00093412	-0.00031996
640	0.033861	0.0032344	-0.038683	-0.0026407	0.097988	0.10797	0.055017	0.00045919	-0.00014925
641	0.032364	0.0028763	-0.038142	-0.0044336	0.095397	0.10511	0.053105	0.00034332	-0.00075722
642	0.031281	0.0030251	-0.03726	-0.0059838	0.092831	0.10239	0.051709	0.00056124	-0.0011921
643	0.031041	0.0029917	-0.037018	-0.006135	0.092531	0.10206	0.051683	0.00041103	-0.0012374
644	0.0316	0.0029817	-0.037132	-0.0051756	0.093416	0.10306	0.05221	0.00030041	-0.0010705
645	0.03188	0.0032492	-0.037241	-0.0046859	0.093277	0.1031	0.052231	0.00063181	-0.00079584
646	0.031982	0.0032663	-0.036689	-0.0039673	0.093725	0.10325	0.052191	0.00078821	-0.00051594
647	0.033122	0.0035715	-0.036489	-0.0031948	0.095482	0.10537	0.053374	0.0010743	-0.00033665
648	0.033916	0.0033107	-0.037477	-0.0032969	0.097147	0.10706	0.054408	0.00086641	-0.00023747
649	0.033392	0.0031009	-0.038797	-0.004528	0.096471	0.10645	0.053786	0.0004139	-0.00069141
650	0.031701	0.00279	-0.039422	-0.0062218	0.09409	0.10383	0.052439	-8.3923e-05	-0.0011659
651	0.030573	0.0030813	-0.038549	-0.0060463	0.092089	0.10177	0.051037	0.00010157	-0.0014439
652	0.032509	0.0035934	-0.037345	-0.0040178	0.095284	0.10497	0.052868	0.00084877	-0.0009079
653	0.035246	0.0032997	-0.037791	-0.0020461	0.10038	0.1102	0.055719	0.00088072	-0.00026607
654	0.035938	0.0034137	-0.03857	-0.001317	0.10125	0.11163	0.056486	0.00087643	0.00042486
655	0.031941	0.0028167	-0.035795	-0.0023456	0.088854	0.098195	0.050684	0.0026565	-0.00041485
656	0.035429	0.0034943	-0.03807	0.0033865	0.093154	0.10278	0.050223	0.0039525	-0.0013471
657	0.029757	0.0012774	-0.033978	0.0032907	0.08746	0.097124	0.044012	0.00023365	-0.0041847
658	0.032783	0.0033274	-0.037411	-0.0037327	0.09573	0.1058	0.053525	0.00026369	-0.00023079
659	0.033442	0.0031824	-0.038774	-0.0035753	0.09734	0.10736	0.053947	0.00020409	-0.00086212
660	0.03376	0.0032463	-0.038786	-0.0035548	0.098153	0.10778	0.054471	0.00031281	-0.00063658
661	0.033793	0.0032716	-0.038842	-0.0034738	0.098213	0.10811	0.054573	0.00026607	-0.00047636
662	0.033865	0.0032635	-0.039048	-0.0034451	0.097919	0.10795	0.054573	0.00011969	-0.00059748
663	0.033581	0.0030785	-0.039025	-0.0036182	0.097878	0.10781	0.054445	0.00011444	-0.00073719
664	0.033648	0.0032043	-0.038998	-0.0035005	0.097938	0.10807	0.054536	0.00011444	-0.00052691
665	0.033466	0.0032949	-0.039257	-0.0036073	0.09797	0.10793	0.054277	0.00010157	-0.0007515
666	0.033551	0.0032644	-0.039026	-0.0034933	0.097847	0.10807	0.054474	6.0082e-05	-0.00045109
667	0.033626	0.0033412	-0.038852	-0.0035739	0.097762	0.10784	0.054457	0.00016165	-0.00054598
668	0.033445	0.0031767	-0.038978	-0.0037842	0.097801	0.10772	0.054425	7.8201e-05	-0.00063801
669	0.033296	0.0030799	-0.039074	-0.0038795	0.097706	0.10767	0.054306	-9.5367e-06	-0.00070047
670	0.033316	0.0030742	-0.039007	-0.0037518	0.097728	0.1077	0.054259	-3.4332e-05	-0.00077057
671	0.033308	0.0031734	-0.039179	-0.0036392	0.097553	0.10745	0.054369	-0.00012016	-0.00070047
672	0.03312	0.0031729	-0.038859	-0.0032043	0.096758	0.10671	0.053774	5.5313e-05	-0.00055504
673	0.033004	0.0031891	-0.038517	-0.0035963	0.096889	0.10689	0.053752	-8.0109e-05	-0.00082016
674	0.033173	0.0029683	-0.038877	-0.0040264	0.097423	0.10714	0.054123	-0.00012827	-0.00091982
675	0.033362	0.0031705	-0.038828	-0.0036044	0.097635	0.10738	0.054198	6.0558e-05	-0.00059986
676	0.033031	0.0030851	-0.038959	-0.0035896	0.097115	0.10708	0.053875	-0.00014639	-0.00074243
677	0.033069	0.0030837	-0.038874	-0.0037065	0.096915	0.10687	0.054049	-3.9577e-05	-0.00073099
678	0.033088	0.0031185	-0.038969	-0.0036492	0.096845	0.10676	0.053887	4.53e-05	-0.00082684
679	0.033006	0.0029831	-0.038879	-0.0037179	0.096847	0.10675	0.053809	-0.00010252	-0.00072146
680	0.033356	0.0031281	-0.03879	-0.0035968	0.096889	0.10698	0.053855	-5.8174e-05	-0.00054312
681	0.032898	0.002923	-0.038814	-0.0037847	0.096704	0.10664	0.053626	-5.3883e-05	-0.00066137
682	0.03315	0.003036	-0.038942	-0.0038714	0.096831	0.10658	0.054006	-6.8665e-05	-0.0006547
683	0.032855	0.0031633	-0.03879	-0.0036416	0.096693	0.10653	0.053845	-0.00016689	-0.00077581
684	0.032926	0.003221	-0.038678	-0.0034685	0.0964	0.10651	0.053688	-8.5831e-05	-0.00079393
685	0.032772	0.0029855	-0.038638	-0.0037208	0.096419	0.10619	0.053643	-0.00018072	-0.00067186
686	0.03296	0.0031304	-0.038616	-0.003572	0.096441	0.1062	0.053562	-0.00010443	-0.00070238
687	0.032816	0.0029402	-0.038689	-0.0036478	0.096204	0.10619	0.053418	-0.00015783	-0.00081634
688	0.032723	0.0029221	-0.03882	-0.0037422	0.096308	0.10589	0.053493	-0.00026941	-0.00076389
689	0.032798	0.003088	-0.038799	-0.0035515	0.096099	0.10602	0.053536	-0.00021505	-0.00074434
690	0.032722	0.003108	-0.038707	-0.003705	0.096251	0.1062	0.053409	-0.00021505	-0.00074959
691	0.032498	0.0027242	-0.038902	-0.003778	0.09582	0.10569	0.05327	-0.00034475	-0.00096035
692	0.032427	0.0029469	-0.038741	-0.0036955	0.095794	0.10552	0.05309	-0.00038481	-0.00090408
693	0.032503	0.0028992	-0.038753	-0.0036898	0.095764	0.10571	0.053387	-0.00020409	-0.00077581
694	0.032583	0.0029197	-0.038672	-0.0035558	0.09596	0.10585	0.053431	-0.00029659	-0.00072241
695	0.032568	0.0029202	-0.038946	-0.0037646	0.095886	0.1056	0.053182	-0.00036812	-0.00094271
696	0.032474	0.0028548	-0.038765	-0.0037613	0.095623	0.10551	0.053213	-0.00037527	-0.00083113
697	0.032767	0.0029984	-0.038447	-0.0034981	0.095945	0.10566	0.053339	-0.00021076	-0.00065374
698	0.032413	0.0029321	-0.038758	-0.0035267	0.095835	0.10558	0.053189	-0.00025845	-0.00071382
699	0.032492	0.0028601	-0.038961	-0.0037789	0.09588	0.10571	0.053081	-0.00039625	-0.00088835
700	0.032631	0.0030613	-0.038837	-0.0036402	0.095942	0.10582	0.053216	-0.00031757	-0.00063753
701	0.032491	0.0029249	-0.03892	-0.0036426	0.096162	0.10576	0.053292	-0.00051737	-0.0008502
702	0.032674	0.003056	-0.038857	-0.003552	0.096269	0.10592	0.053403	-0.00035524	-0.00078869
703	0.032745	0.0029435	-0.039104	-0.003387	0.096279	0.10621	0.053523	-0.00050592	-0.00074577
704	0.032919	0.0030966	-0.039099	-0.0034795	0.096342	0.10631	0.053742	-0.00039244	-0.00072432
705	0.032642	0.0028114	-0.039081	-0.0034995	0.096327	0.10636	0.053488	-0.00056696	-0.00068235
706	0.032833	0.002943	-0.03896	-0.0035524	0.09641	0.10622	0.053617	-0.00048733	-0.00078106
707	0.032947	0.0027447	-0.03921	-0.0032568	0.096447	0.1064	0.053465	-0.00036192	-0.00070286
708	0.032868	0.002965	-0.039148	-0.0031652	0.096639	0.10653	0.053555	-0.00038528	-0.00078011
709	0.032944	0.0029793	-0.039204	-0.0033245	0.096901	0.10693	0.053847	-0.00053597	-0.00076342
710	0.032933	0.0029898	-0.039179	-0.0033631	0.097007	0.10705	0.053945	-0.00048971	-0.00065899
711	0.033117	0.0028777	-0.039266	-0.0033317	0.097114	0.10724	0.053925	-0.00048399	-0.00061131
712	0.03307	0.0027962	-0.039469	-0.0033541	0.097252	0.10737	0.053995	-0.00048351	-0.00078297
713	0.033154	0.0028849	-0.039488	-0.0032015	0.097506	0.10749	0.054111	-0.00052643	-0.00090218
714	0.03334	0.0029526	-0.03944	-0.0028877	0.097703	0.10766	0.054132	-0.0004139	-0.00069094
715	0.033365	0.0029197	-0.039481	-0.0029078	0.097863	0.10788	0.054293	-0.00050736	-0.00068712
716	0.033711	0.003099	-0.039524	-0.0026283	0.098422	0.10836	0.054453	-0.00046349	-0.00057077
717	0.033666	0.002892	-0.039946	-0.0029163	0.098446	0.10852	0.054669	-0.00062037	-0.00072002
718	0.033592	0.002605	-0.040251	-0.002974	0.098303	0.10834	0.054391	-0.00065565	-0.00089216
719	0.033714	0.0028968	-0.040136	-0.0028205	0.098622	0.10874	0.05454	-0.00058079	-0.0007019
720	0.033753	0.0028405	-0.040093	-0.0029311	0.09863	0.10871	0.05455	-0.00060081	-0.00067377
721	0.033912	0.0028563	-0.040186	-0.002852	0.098739	0.10902	0.0546	-0.00055551	-0.00077534
722	0.033869	0.0029931	-0.040082	-0.0027466	0.099104	0.10908	0.054956	-0.00050545	-0.00068808
723	0.033878	0.0029116	-0.040196	-0.0027261	0.099127	0.10923	0.055036	-0.00052452	-0.00079393
724	0.033831	0.0029011	-0.040278	-0.0029883	0.099013	0.1091	0.054865	-0.00068188	-0.00075102
725	0.033922	0.0029058	-0.04019	-0.0029998	0.098969	0.10895	0.054858	-0.00050879	-0.00073242
726	0.033783	0.0028644	-0.0402	-0.0029349	0.098946	0.10892	0.054807	-0.00066662	-0.00089073
727	0.033602	0.0027819	-0.040308	-0.0032072	0.098815	0.10879	0.05461	-0.00074053	-0.00077295
728	0.03358	0.0028653	-0.040043	-0.0031376	0.098814	0.10888	0.054679	-0.00062895	-0.00073814
729	0.033619	0.0027328	-0.040107	-0.0031853	0.0986	0.10849	0.054509	-0.00068188	-0.00090265
730	0.033587	0.0028486	-0.040104	-0.00319	0.098501	0.10846	0.054694	-0.00054169	-0.00076675
731	0.033796	0.0029335	-0.039971	-0.0028267	0.098579	0.10856	0.054561	-0.00050116	-0.0007515
732	0.033716	0.0027952	-0.040008	-0.0029006	0.098396	0.10846	0.054438	-0.00057125	-0.00073767
733	0.033664	0.0028248	-0.039708	-0.0027418	0.098421	0.10827	0.05441	-0.00049067	-0.00080013
734	0.033617	0.0028615	-0.039757	-0.0026035	0.098084	0.10812	0.054163	-0.00045061	-0.00077391
735	0.03372	0.0028329	-0.03979	-0.0025573	0.098088	0.10804	0.054252	-0.00054359	-0.00078487
736	0.033494	0.002851	-0.039834	-0.0027204	0.097816	0.10779	0.054253	-0.00054121	-0.00096655
737	0.033304	0.0025902	-0.039742	-0.0026579	0.09736	0.10724	0.053755	-0.00070524	-0.00086594
738	0.033099	0.0027432	-0.039727	-0.0027695	0.097282	0.10722	0.05399	-0.00077677	-0.00077343
739	0.033243	0.00284	-0.039313	-0.0028481	0.097244	0.10712	0.053922	-0.00059223	-0.00056505
740	0.033201	0.0029316	-0.039483	-0.0029249	0.097136	0.10694	0.053785	-0.00065041	-0.00075054
741	0.033203	0.003068	-0.039704	-0.0031056	0.096852	0.10683	0.05385	-0.00044441	-0.0007081
742	0.032914	0.0028086	-0.039378	-0.0028696	0.096209	0.10593	0.053497	-0.00047159	-0.0010672
743	0.032588	0.002502	-0.038745	-0.0028729	0.095722	0.10555	0.053335	-0.0005846	-0.00087071
744	0.032985	0.0026946	-0.038496	-0.0029583	0.096483	0.10597	0.0539	-0.00048971	-0.00034237
745	0.033194	0.0025063	-0.038744	-0.0029163	0.097571	0.10735	0.054317	-0.00051689	-0.00018168
746	0.033374	0.0028272	-0.039203	-0.0027146	0.097128	0.10695	0.053657	-0.00044823	-0.00058556
747	0.033142	0.0029082	-0.039295	-0.0026784	0.096109	0.10596	0.053179	-0.00030994	-0.00071478
748	0.032782	0.0029202	-0.039336	-0.0029755	0.095599	0.1055	0.052905	-0.0003109	-0.00084209
749	0.032545	0.0028563	-0.039068	-0.0032144	0.095049	0.10489	0.05289	-0.0003891	-0.000916
750	0.032324	0.0028062	-0.038612	-0.0031161	0.094509	0.10414	0.052527	-0.00042725	-0.00088739
751	0.031836	0.0027056	-0.038635	-0.0033588	0.09397	0.10378	0.05223	-0.00064516	-0.001019
752	0.031536	0.0025902	-0.038535	-0.003396	0.09362	0.10323	0.051893	-0.00080252	-0.0011163
753	0.031457	0.0025916	-0.0384	-0.0036788	0.093335	0.10301	0.051851	-0.00071001	-0.0010262
754	0.031428	0.0025969	-0.038355	-0.0033512	0.093169	0.10305	0.051609	-0.00069046	-0.00107
755	0.031192	0.0025544	-0.038324	-0.0036693	0.093038	0.10259	0.051656	-0.00069237	-0.0010519
756	0.03106	0.0024886	-0.038346	-0.0036221	0.092459	0.10229	0.051232	-0.00078106	-0.0013094
757	0.031082	0.0026851	-0.038033	-0.0034657	0.092317	0.10206	0.051075	-0.00065327	-0.0010772
758	0.030911	0.0024385	-0.038185	-0.003571	0.092042	0.10182	0.050905	-0.00067854	-0.0011139
759	0.030799	0.0024562	-0.038025	-0.0037689	0.091926	0.10167	0.050965	-0.00084162	-0.0011511
760	0.030864	0.0025101	-0.037973	-0.0035334	0.091745	0.10123	0.050802	-0.00075054	-0.0011263
761	0.030905	0.0027132	-0.03782	-0.0035067	0.091959	0.10147	0.050955	-0.00063944	-0.001111
762	0.030762	0.0025392	-0.03811	-0.0037246	0.091816	0.10153	0.051018	-0.00082922	-0.00098515
763	0.030828	0.0025592	-0.037899	-0.0037484	0.091844	0.10138	0.050948	-0.00086308	-0.0011444
764	0.030828	0.0024734	-0.03789	-0.0037174	0.091618	0.10111	0.050786	-0.00085926	-0.0012083
765	0.030941	0.0025015	-0.037801	-0.0033016	0.091756	0.10124	0.050798	-0.00080061	-0.0010695
766	0.030729	0.0024509	-0.038248	-0.0037236	0.091829	0.10146	0.050834	-0.0011096	-0.0012355
767	0.030722	0.0024881	-0.038197	-0.0037637	0.09197	0.10159	0.050972	-0.0008297	-0.0010457
768	0.030594	0.0023856	-0.038056	-0.0039787	0.091851	0.10132	0.050909	-0.00098276	-0.0011911
769	0.030792	0.0025187	-0.038065	-0.0033851	0.091904	0.10154	0.050858	-0.00088501	-0.0011697
770	0.030702	0.0024328	-0.038168	-0.0035157	0.091976	0.1016	0.050892	-0.00089645	-0.0012293
771	0.030718	0.0025191	-0.03821	-0.0034771	0.092089	0.10157	0.050847	-0.00099087	-0.0011463
772	0.030846	0.002409	-0.038345	-0.0036917	0.092315	0.10172	0.051125	-0.0011063	-0.0011606
773	0.030928	0.0024385	-0.038433	-0.0035648	0.092484	0.10208	0.051237	-0.00095177	-0.0010905
774	0.030983	0.0024285	-0.038556	-0.0036721	0.092591	0.10227	0.051202	-0.0010118	-0.0011873
775	0.031184	0.0024872	-0.038511	-0.0036502	0.093103	0.10275	0.051517	-0.0011187	-0.0010638
776	0.031074	0.0024033	-0.038691	-0.0036373	0.09304	0.10273	0.051357	-0.0012226	-0.001123
777	0.031018	0.0023856	-0.038827	-0.0038319	0.093122	0.1028	0.05128	-0.0012884	-0.0012054
778	0.031299	0.0023875	-0.038696	-0.0035949	0.09319	0.10275	0.051523	-0.0011382	-0.0012608
779	0.03127	0.0025249	-0.038717	-0.0034814	0.093266	0.10302	0.051497	-0.0010333	-0.0012078
780	0.031311	0.0023503	-0.038956	-0.0035634	0.093518	0.1032	0.051709	-0.0012689	-0.0011959
781	0.031473	0.0025482	-0.038742	-0.0034051	0.093619	0.10338	0.051651	-0.0010824	-0.0011992
782	0.031398	0.0022268	-0.039099	-0.0034924	0.093531	0.10348	0.051507	-0.0013609	-0.0014
783	0.031428	0.0022688	-0.03922	-0.0034575	0.093942	0.10377	0.051715	-0.0013666	-0.0014434
784	0.031565	0.0023422	-0.039311	-0.0033879	0.09426	0.10401	0.051931	-0.0013361	-0.0013189
785	0.031757	0.0024772	-0.039264	-0.0034237	0.094572	0.10442	0.052201	-0.001205	-0.0012436
786	0.031678	0.0024915	-0.03931	-0.0033708	0.094769	0.1046	0.052264	-0.0012741	-0.0012312
787	0.031802	0.0024261	-0.039395	-0.0033422	0.094866	0.10472	0.052206	-0.0013757	-0.0012894
788	0.031826	0.0024204	-0.039302	-0.0033026	0.094913	0.10488	0.052214	-0.0012889	-0.0011973
789	0.031881	0.0022993	-0.039694	-0.0033112	0.094964	0.10492	0.052077	-0.0014305	-0.0014658
790	0.031926	0.0023923	-0.039813	-0.0032763	0.095297	0.10529	0.052491	-0.0014195	-0.0012908
791	0.031875	0.0022964	-0.039834	-0.0033793	0.095345	0.10532	0.052435	-0.001462	-0.0013976
792	0.032048	0.0023899	-0.039807	-0.0032229	0.095715	0.10575	0.052751	-0.0013752	-0.0012426
793	0.032165	0.0024452	-0.039759	-0.0031481	0.095682	0.10576	0.052801	-0.0013738	-0.0011764
794	0.032075	0.0023751	-0.039792	-0.0031939	0.095791	0.1056	0.052458	-0.0013943	-0.0014601
795	0.032283	0.0023718	-0.040009	-0.0030694	0.095694	0.10582	0.052557	-0.0014691	-0.0013814
796	0.032148	0.0023675	-0.040395	-0.0031304	0.096051	0.10606	0.052818	-0.0015101	-0.0014968
797	0.032173	0.0023446	-0.040094	-0.0031314	0.096062	0.10605	0.053044	-0.0014868	-0.001235
798	0.032244	0.0023246	-0.040264	-0.0032282	0.096056	0.10599	0.052955	-0.0015559	-0.0014105
799	0.032346	0.0024562	-0.040125	-0.0030727	0.096317	0.1063	0.05298	-0.0014982	-0.001318
800	0.032248	0.0023546	-0.040336	-0.0032549	0.096153	0.10622	0.052874	-0.0015411	-0.0014462
801	0.032083	0.0023875	-0.040113	-0.0032783	0.096254	0.10623	0.052775	-0.0014949	-0.0015039
802	0.032402	0.0024366	-0.040153	-0.0030551	0.096299	0.10637	0.053115	-0.00141	-0.0012131
803	0.032083	0.0021977	-0.040186	-0.0034065	0.095967	0.1061	0.052869	-0.00173	-0.0014534
804	0.032261	0.002418	-0.04038	-0.0031743	0.09625	0.10615	0.052874	-0.0015745	-0.0014715
805	0.032257	0.0023646	-0.040102	-0.0033054	0.096212	0.10606	0.052774	-0.0014586	-0.0014329
806	0.032164	0.002255	-0.039972	-0.00317	0.095797	0.10594	0.052721	-0.0015178	-0.0015364
807	0.032269	0.002459	-0.039969	-0.0031309	0.095832	0.10576	0.052783	-0.0013456	-0.001225
808	0.032052	0.0022869	-0.040073	-0.0035124	0.095544	0.10558	0.052475	-0.0015969	-0.0014806
809	0.03207	0.0023589	-0.040226	-0.0033479	0.095562	0.10565	0.052376	-0.0015712	-0.001668
810	0.032056	0.0024123	-0.039993	-0.0033145	0.095701	0.10557	0.052539	-0.0014825	-0.0013704
811	0.032085	0.0023608	-0.039866	-0.0031695	0.095439	0.10533	0.052562	-0.0014687	-0.0013895
812	0.031955	0.0022402	-0.040064	-0.0033951	0.095352	0.10524	0.052567	-0.0015459	-0.0014038
813	0.031916	0.0022726	-0.039852	-0.0034485	0.095047	0.10493	0.052348	-0.0014949	-0.001411
814	0.031841	0.0023403	-0.039759	-0.0032229	0.094977	0.10479	0.052179	-0.0014601	-0.0015292
815	0.031634	0.0021725	-0.039892	-0.0034008	0.094828	0.10458	0.052101	-0.0016775	-0.0013523
816	0.031607	0.0022779	-0.039557	-0.0034447	0.094808	0.10453	0.052079	-0.0016322	-0.0013928
817	0.031651	0.0021753	-0.039686	-0.0035806	0.094603	0.10436	0.051905	-0.0015588	-0.0015435
818	0.031275	0.0022244	-0.039698	-0.0034704	0.094273	0.1041	0.051741	-0.0015497	-0.0015011
819	0.03116	0.0021114	-0.039486	-0.0035996	0.093949	0.10382	0.051721	-0.0016918	-0.0013528
820	0.031424	0.0022788	-0.039329	-0.0036502	0.09375	0.10376	0.051682	-0.001606	-0.0013375
821	0.031351	0.0022979	-0.03942	-0.0035148	0.093815	0.10346	0.051418	-0.0015683	-0.0013986
822	0.031156	0.0023427	-0.039369	-0.003716	0.093741	0.10335	0.051466	-0.0015426	-0.0014267
823	0.030987	0.0021715	-0.039217	-0.0037599	0.093289	0.10288	0.051174	-0.0016356	-0.0014591
824	0.03092	0.0022249	-0.039279	-0.0037904	0.092936	0.10269	0.05104	-0.0017452	-0.0015645
825	0.030889	0.002151	-0.039146	-0.0038738	0.092802	0.10248	0.050753	-0.0017357	-0.0016241
826	0.030775	0.0022993	-0.038954	-0.0036888	0.092657	0.10247	0.051017	-0.0014849	-0.00142
827	0.030547	0.0019617	-0.038733	-0.0038838	0.09217	0.10177	0.050697	-0.001729	-0.0013876
828	0.030675	0.0022707	-0.038991	-0.0040259	0.092504	0.10188	0.050723	-0.0016603	-0.0014834
829	0.030633	0.0022025	-0.038834	-0.0038962	0.092166	0.10193	0.050461	-0.001636	-0.0014949
830	0.030516	0.0021634	-0.038777	-0.0034637	0.092147	0.10181	0.050392	-0.0014973	-0.0015001
831	0.030477	0.0022264	-0.038733	-0.0039864	0.092182	0.10151	0.050571	-0.0018039	-0.0014668
832	0.030203	0.002264	-0.038792	-0.0042753	0.091812	0.10137	0.050335	-0.0019236	-0.0015216
833	0.029885	0.0022397	-0.038682	-0.0043159	0.091236	0.10066	0.049829	-0.0017581	-0.001606
834	0.029998	0.0021744	-0.038396	-0.0043206	0.091197	0.10101	0.050098	-0.0017905	-0.0015483
835	0.030216	0.0022802	-0.038463	-0.0038462	0.091531	0.10111	0.05019	-0.0017252	-0.0013986
836	0.030412	0.0023584	-0.038446	-0.0035391	0.091866	0.10164	0.050227	-0.0015316	-0.0012288
837	0.030455	0.0022783	-0.038337	-0.0037808	0.091654	0.10131	0.0503	-0.0015979	-0.0014076
838	0.03038	0.0023251	-0.038274	-0.0037026	0.091566	0.10119	0.050333	-0.0015755	-0.0012755
839	0.030208	0.0021386	-0.038512	-0.0037756	0.091601	0.10121	0.050238	-0.0016417	-0.001389
840	0.030341	0.0021334	-0.038463	-0.0036006	0.091483	0.10107	0.050021	-0.001555	-0.0013566
841	0.03011	0.0021548	-0.038344	-0.0038428	0.091375	0.10085	0.050103	-0.0015779	-0.0013652
842	0.030118	0.0021939	-0.038451	-0.0039454	0.09142	0.10076	0.050001	-0.0017743	-0.0014129
843	0.029924	0.00212	-0.038566	-0.0039191	0.09136	0.10096	0.049907	-0.0017409	-0.0015364
844	0.030132	0.0022168	-0.038235	-0.0035911	0.091251	0.10093	0.050104	-0.0015526	-0.0012994
845	0.030159	0.0023828	-0.038252	-0.004004	0.091266	0.10094	0.050237	-0.0016527	-0.0012207
846	0.029943	0.0022511	-0.038589	-0.0037947	0.091352	0.10106	0.049989	-0.0018935	-0.0015345
847	0.03	0.0021739	-0.038538	-0.0039945	0.091124	0.10086	0.050092	-0.0018363	-0.0015454
848	0.03011	0.0022111	-0.038448	-0.0038428	0.091471	0.10118	0.050134	-0.0019526	-0.0013366
849	0.029976	0.0020752	-0.038698	-0.0038581	0.091234	0.1009	0.050021	-0.001935	-0.0016417
850	0.029833	0.0018654	-0.038737	-0.0040274	0.0912	0.10098	0.049826	-0.0020084	-0.00176
851	0.029918	0.0021362	-0.038686	-0.0041137	0.091337	0.10099	0.049945	-0.0020165	-0.001513
852	0.030021	0.0021605	-0.038593	-0.0040364	0.091223	0.10098	0.049755	-0.0018253	-0.0017128
853	0.030056	0.0021081	-0.038486	-0.0036569	0.091136	0.10098	0.04987	-0.0017729	-0.00176
854	0.030104	0.0019689	-0.039079	-0.0037694	0.091289	0.10074	0.04987	-0.0019178	-0.0015965
855	0.030131	0.0020142	-0.039288	-0.0038118	0.09174	0.10145	0.049837	-0.0020771	-0.0017467
856	0.030282	0.0018659	-0.039168	-0.0035901	0.091853	0.10167	0.050281	-0.002131	-0.001586
857	0.030372	0.0022335	-0.039115	-0.0037045	0.092024	0.10186	0.050201	-0.0021896	-0.0013351
858	0.029985	0.0021105	-0.039299	-0.0040545	0.091845	0.10175	0.050112	-0.0022287	-0.0018868
859	0.030474	0.0019374	-0.039263	-0.003932	0.092142	0.10191	0.050565	-0.0019989	-0.00177
860	0.030276	0.0019832	-0.039291	-0.004107	0.09212	0.10179	0.050296	-0.0021753	-0.0017414
861	0.030272	0.0020752	-0.039546	-0.0039139	0.092502	0.1021	0.050261	-0.0023108	-0.001884
862	0.030342	0.0018196	-0.039605	-0.0043502	0.092343	0.10197	0.050262	-0.0022788	-0.001832
863	0.030092	0.0020976	-0.03937	-0.0045366	0.09226	0.10208	0.050425	-0.0021911	-0.0018616
864	0.030188	0.0019307	-0.03971	-0.0042534	0.092565	0.10211	0.050395	-0.0023394	-0.0021286
865	0.030487	0.0017681	-0.03957	-0.0039535	0.092471	0.10233	0.050558	-0.0022955	-0.0017328
866	0.030422	0.0020194	-0.039638	-0.0040045	0.092896	0.10256	0.050503	-0.002358	-0.0018992
867	0.030493	0.0017519	-0.039806	-0.0038528	0.092815	0.10265	0.050494	-0.002347	-0.0020342
868	0.030699	0.0018606	-0.039993	-0.0039258	0.092832	0.10281	0.050491	-0.0023503	-0.0019975
869	0.030521	0.002059	-0.039923	-0.0040956	0.093072	0.1031	0.050752	-0.0022697	-0.0019813
870	0.030628	0.0016971	-0.039794	-0.0039477	0.092981	0.10266	0.050471	-0.0024939	-0.0021019
871	0.030544	0.0018005	-0.040205	-0.003808	0.093107	0.10311	0.050663	-0.0026331	-0.0019579
872	0.030449	0.0017748	-0.040472	-0.0039482	0.093229	0.1031	0.050343	-0.0025797	-0.002264
873	0.030679	0.0016665	-0.040113	-0.0039678	0.093083	0.10314	0.050647	-0.0024438	-0.0021105
874	0.030429	0.0018625	-0.040297	-0.0038137	0.093256	0.10322	0.050679	-0.0025463	-0.0018544
875	0.030784	0.0017014	-0.040223	-0.003799	0.093391	0.10354	0.050687	-0.0025063	-0.0021858
876	0.030951	0.001996	-0.040272	-0.003871	0.093194	0.10344	0.050787	-0.0022621	-0.0019946
877	0.030477	0.0019336	-0.040303	-0.0043406	0.092947	0.10307	0.050611	-0.0025754	-0.0021958
878	0.031052	0.001853	-0.040001	-0.0034246	0.093643	0.10364	0.05134	-0.002327	-0.0018501
879	0.03117	0.0018001	-0.040325	-0.0030212	0.094008	0.1039	0.050966	-0.0021844	-0.0015144
880	0.030921	0.0016556	-0.040766	-0.0030122	0.093935	0.10393	0.050703	-0.0026698	-0.0023246
881	0.030741	0.0016174	-0.040496	-0.0037918	0.093647	0.10349	0.050826	-0.0028577	-0.0021338
882	0.030544	0.0015702	-0.04053	-0.0040188	0.092821	0.10292	0.050615	-0.002552	-0.0022655
883	0.030546	0.0013227	-0.040638	-0.0043902	0.093151	0.10306	0.050217	-0.0028615	-0.0025902
884	0.03051	0.0015736	-0.040594	-0.0039825	0.093163	0.103	0.050555	-0.0027075	-0.0021396
885	0.030449	0.0014811	-0.040793	-0.0040903	0.093126	0.10307	0.050438	-0.0028386	-0.0024323
886	0.030648	0.0018234	-0.04052	-0.0037351	0.093044	0.10295	0.050533	-0.0024395	-0.0022268
887	0.030924	0.0018134	-0.040585	-0.0038433	0.093414	0.10341	0.050775	-0.002491	-0.0019665
888	0.030359	0.0014668	-0.040635	-0.0040045	0.092821	0.10291	0.050394	-0.0026503	-0.0025377
889	0.030204	0.0013003	-0.040912	-0.0041952	0.092657	0.10263	0.050546	-0.0029659	-0.0025105
890	0.030487	0.0014753	-0.040739	-0.004087	0.092932	0.10265	0.050221	-0.0028596	-0.0027819
891	0.030521	0.0015984	-0.040426	-0.0038486	0.09294	0.10292	0.050852	-0.0026889	-0.0020356
892	0.030624	0.0017281	-0.040654	-0.0038052	0.09255	0.10287	0.050552	-0.0025754	-0.0021625
893	0.030199	0.0012569	-0.041016	-0.0044913	0.092339	0.10157	0.049609	-0.0029292	-0.0027127
894	0.030336	0.0015216	-0.04045	-0.0042963	0.09239	0.10239	0.049918	-0.002861	-0.00243
895	0.030005	0.0012727	-0.040688	-0.0041947	0.091956	0.10172	0.049687	-0.0030875	-0.0027137
896	0.030256	0.0013957	-0.040578	-0.0042558	0.0917	0.10169	0.049723	-0.0029683	-0.0021777
897	0.030029	0.0011954	-0.0406	-0.0043769	0.091874	0.10132	0.049539	-0.0029359	-0.0025439
898	0.03011	0.0014987	-0.040552	-0.004137	0.091577	0.10134	0.049678	-0.0027981	-0.0023522
899	0.02976	0.0014539	-0.040533	-0.0040312	0.091809	0.10114	0.049477	-0.0028124	-0.0022135
900	0.0297	0.0010104	-0.040333	-0.0044813	0.090656	0.10065	0.049137	-0.002985	-0.0026646
901	0.029919	0.0015335	-0.040157	-0.004385	0.091096	0.10053	0.049139	-0.0028901	-0.0022321
902	0.029922	0.0016541	-0.040103	-0.0042148	0.091099	0.10076	0.049107	-0.0027833	-0.0023961
903	0.029741	0.0016994	-0.039711	-0.0041614	0.09086	0.10064	0.049373	-0.0026875	-0.0020475
904	0.029761	0.0014224	-0.040245	-0.0046153	0.091096	0.10059	0.049124	-0.0029469	-0.0024319
905	0.029719	0.0017233	-0.03981	-0.0042391	0.089978	0.099896	0.049066	-0.0029941	-0.0023055
906	0.029768	0.0016427	-0.039703	-0.004148	0.089793	0.10006	0.048993	-0.0028729	-0.002275
907	0.029367	0.001471	-0.039378	-0.0043936	0.090047	0.099648	0.048763	-0.0030398	-0.0024571
908	0.02955	0.0019312	-0.039623	-0.0042019	0.089852	0.099502	0.049026	-0.0029931	-0.0022707
909	0.029084	0.001193	-0.040018	-0.0044241	0.089452	0.098892	0.048137	-0.0032444	-0.0028353
910	0.028753	0.0012736	-0.039502	-0.0046611	0.089232	0.098859	0.048411	-0.0028772	-0.0024586
911	0.029058	0.00141	-0.039724	-0.0041399	0.089199	0.098738	0.048199	-0.0030231	-0.0024967
912	0.028877	0.001183	-0.039633	-0.0044284	0.089018	0.098906	0.048042	-0.0030036	-0.0025072
913	0.029136	0.0014548	-0.03978	-0.0046887	0.088825	0.098487	0.047863	-0.0028677	-0.0025101
914	0.028864	0.0013824	-0.039631	-0.0045309	0.08909	0.098403	0.048122	-0.0029025	-0.0022664
915	0.02872	0.0017557	-0.039277	-0.0043697	0.088978	0.098962	0.047896	-0.003067	-0.0024776
916	0.028814	0.0015106	-0.039283	-0.0043325	0.088861	0.098403	0.047726	-0.0025964	-0.002212
917	0.028499	0.0011096	-0.039581	-0.0047894	0.088619	0.097935	0.047566	-0.003221	-0.0025282
918	0.029032	0.0017743	-0.03899	-0.0044804	0.088764	0.0984	0.048222	-0.0024414	-0.0022602
919	0.029015	0.002224	-0.038573	-0.0043607	0.088883	0.098699	0.048045	-0.0026731	-0.0018835
920	0.028495	0.0012674	-0.039283	-0.0050507	0.088406	0.097967	0.04733	-0.0030761	-0.0027852
921	0.028698	0.0015678	-0.038811	-0.0043278	0.088142	0.097551	0.047635	-0.0026474	-0.0017824
922	0.028655	0.0012832	-0.039222	-0.0047541	0.088295	0.097109	0.047424	-0.0029974	-0.0030122
923	0.028733	0.0017653	-0.038913	-0.0048518	0.088095	0.097478	0.047549	-0.0028186	-0.0020685
924	0.028664	0.0014515	-0.038615	-0.004837	0.088111	0.097248	0.047567	-0.0030265	-0.0024576
925	0.028576	0.0011773	-0.038723	-0.0052032	0.088058	0.096991	0.047396	-0.0030856	-0.0025773
926	0.028491	0.0010171	-0.0387	-0.0047646	0.087399	0.09642	0.046946	-0.0032926	-0.0026207
927	0.029233	0.0016894	-0.038675	-0.0047231	0.087998	0.096903	0.047614	-0.0028925	-0.0020623
928	0.028495	0.0012126	-0.039025	-0.0048347	0.087599	0.09669	0.046793	-0.0030708	-0.0025663
929	0.028285	0.0013523	-0.038799	-0.0049596	0.08759	0.096618	0.047258	-0.0032907	-0.0022702
930	0.028092	0.0012388	-0.03865	-0.0047474	0.087267	0.096587	0.046779	-0.0030651	-0.0022893
931	0.028687	0.0016112	-0.038611	-0.0047684	0.087631	0.096649	0.046937	-0.0030122	-0.0019445
932	0.028557	0.0017653	-0.038334	-0.0039964	0.087803	0.097194	0.047359	-0.0027304	-0.0017123
933	0.0284	0.001771	-0.038652	-0.0047636	0.087328	0.096868	0.046569	-0.003068	-0.002049
934	0.028582	0.0020018	-0.038244	-0.0045614	0.087461	0.09665	0.046857	-0.002974	-0.0022497
935	0.028507	0.0016003	-0.038058	-0.0048575	0.087766	0.097079	0.047298	-0.0028076	-0.0017953
936	0.028264	0.0013452	-0.038505	-0.0049877	0.08766	0.096961	0.046965	-0.003448	-0.002306
937	0.028478	0.0017924	-0.03801	-0.004663	0.087871	0.097021	0.046792	-0.0030818	-0.0015755
938	0.028766	0.001328	-0.037959	-0.0045009	0.087718	0.096694	0.046397	-0.0030999	-0.0021706
939	0.028378	0.0011768	-0.038117	-0.0044904	0.087748	0.096736	0.046827	-0.0031052	-0.0021701
940	0.028785	0.0016365	-0.037886	-0.0041656	0.087862	0.097008	0.046437	-0.003335	-0.0017586
941	0.028422	0.0016799	-0.0376	-0.0048075	0.087641	0.097011	0.046465	-0.0029407	-0.0018849
942	0.028932	0.0016756	-0.037651	-0.0038252	0.088439	0.097219	0.047522	-0.0030012	-0.0014787
943	0.028625	0.001688	-0.038025	-0.0045838	0.087865	0.097052	0.046658	-0.002955	-0.001832
944	0.028949	0.0017662	-0.03787	-0.0044127	0.08806	0.09732	0.046925	-0.0029793	-0.0020852
945	0.02953	0.0018759	-0.037521	-0.0043311	0.087886	0.097152	0.046975	-0.0032048	-0.0014977
946	0.029059	0.0023389	-0.036933	-0.0046034	0.087992	0.096909	0.046534	-0.0030217	-0.001596
947	0.029077	0.0018692	-0.037781	-0.0047269	0.088199	0.097104	0.047026	-0.0031548	-0.0019135
948	0.028375	0.0020294	-0.038098	-0.0047894	0.087427	0.097324	0.046712	-0.0033712	-0.0018306
949	0.029386	0.0023513	-0.037182	-0.0037923	0.088645	0.09782	0.046919	-0.0028343	-0.001205
950	0.029136	0.0018582	-0.037673	-0.0042291	0.088402	0.096391	0.046404	-0.0038476	-0.0019913
951	0.030173	0.0023713	-0.036901	-0.0037265	0.088493	0.09824	0.047584	-0.0032301	-0.001112
952	0.028951	0.0018282	-0.037224	-0.004384	0.0882	0.097801	0.046138	-0.0030265	-0.0017476
953	0.029107	0.0017409	-0.037839	-0.0042882	0.088159	0.097135	0.046197	-0.0030751	-0.0014868
954	0.030229	0.0022154	-0.036852	-0.0038285	0.08872	0.097686	0.046055	-0.0028558	-0.00084352
955	0.029665	0.0024114	-0.036632	-0.0038438	0.088674	0.097326	0.046813	-0.0030656	-0.0019078
956	0.029325	0.002213	-0.036646	-0.0040021	0.089392	0.097405	0.046882	-0.0033507	-0.00069332
957	0.029691	0.0011826	-0.037017	-0.0038061	0.089094	0.098126	0.046196	-0.0034828	-0.00074863
958	0.029284	0.0017376	-0.037314	-0.0041585	0.089067	0.097352	0.045814	-0.0033622	-0.0016842
959	0.029823	0.002717	-0.036816	-0.0038924	0.090295	0.098184	0.046675	-0.0029573	-0.00074768
960	0.029657	0.0030928	-0.036154	-0.0043592	0.089175	0.098193	0.047244	-0.0029445	-0.00024605
961	0.029552	0.0018368	-0.03669	-0.00418	0.089417	0.098167	0.046347	-0.0041308	-0.0007019
962	0.030501	0.0015697	-0.036836	-0.0037732	0.090117	0.09762	0.046748	-0.0033965	-0.00041294
963	0.030982	0.0031509	-0.035458	-0.0033412	0.091339	0.10006	0.047483	-0.0027223	-0.00024939
964	0.030526	0.0021954	-0.035934	-0.0044503	0.09158	0.099908	0.046812	-0.0036874	-0.00080824
965	0.030242	0.0024648	-0.036619	-0.0034862	0.090873	0.099688	0.047763	-0.0031886	-0.0014606
966	0.029977	0.0019584	-0.037191	-0.0044961	0.090789	0.09887	0.046644	-0.0037642	-0.00075007
967	0.029627	0.0010705	-0.038146	-0.0051899	0.08954	0.098458	0.046512	-0.0040169	-0.001792
968	0.029007	0.00090742	-0.039106	-0.0053635	0.089762	0.098097	0.045843	-0.0050821	-0.0025148
969	0.029757	0.0013194	-0.038284	-0.005055	0.091433	0.098218	0.046985	-0.0038438	-0.0011525
970	0.029265	0.0010886	-0.039187	-0.0056767	0.088471	0.097611	0.045702	-0.0041018	-0.0020089
971	0.029508	0.0025687	-0.037498	-0.0046525	0.090552	0.1001	0.046693	-0.0042276	-0.0016937
972	0.02895	0.00088739	-0.039524	-0.0054703	0.089527	0.098647	0.0469	-0.0050974	-0.0024118
973	0.030419	0.0013118	-0.038213	-0.0041571	0.090914	0.099846	0.047169	-0.0041928	-0.0017209
974	0.029359	0.00088501	-0.03847	-0.0047231	0.089818	0.099573	0.046366	-0.0047922	-0.0024123
975	0.029524	0.0013728	-0.039169	-0.0050392	0.090451	0.098743	0.046065	-0.0045757	-0.0028081
976	0.029134	0.0018578	-0.038445	-0.004612	0.091712	0.099791	0.046791	-0.0050783	-0.00092697
977	0.029383	0.0011663	-0.039456	-0.0056205	0.090068	0.098289	0.046272	-0.0055294	-0.0029769
978	0.0283	0.00039577	-0.039701	-0.0062728	0.089261	0.098603	0.045983	-0.0052013	-0.0032463
979	0.028764	0.00050545	-0.0404	-0.0054784	0.0898	0.098695	0.04558	-0.0052376	-0.0036392
980	0.029414	0.00050116	-0.039971	-0.0053611	0.090151	0.098827	0.046164	-0.0063505	-0.003459
981	0.028638	0.00052548	-0.040945	-0.0049868	0.089298	0.097423	0.046209	-0.0059843	-0.0035481
982	0.029469	0.00018644	-0.04082	-0.0051212	0.089069	0.098369	0.046104	-0.0061364	-0.004118
983	0.029558	-7.0095e-05	-0.040926	-0.0052061	0.089031	0.097782	0.047069	-0.0062551	-0.0043592
984	0.028535	0.00031519	-0.042527	-0.0052094	0.088373	0.099152	0.0458	-0.0062017	-0.0051556
985	0.02963	-0.00058413	-0.042307	-0.0059161	0.088572	0.097364	0.045589	-0.0074816	-0.0054221
986	0.029176	0.00051069	-0.042813	-0.0055022	0.087495	0.0983	0.046041	-0.0063195	-0.0042491
987	0.028843	0.00066567	-0.042716	-0.0055342	0.088851	0.097985	0.046043	-0.0056429	-0.0037856
988	0.030499	0.0020623	-0.041799	-0.0049696	0.089723	0.098028	0.047186	-0.0061412	-0.0044498
989	0.029874	-0.00039196	-0.04375	-0.0053864	0.087051	0.097821	0.045555	-0.006762	-0.0057693
990	0.0282	-3.3379e-06	-0.042559	-0.0051665	0.089293	0.098683	0.045899	-0.0063462	-0.0046229
991	0.028852	-0.0006628	-0.043933	-0.006743	0.086547	0.096591	0.044911	-0.0064526	-0.005167
992	0.029627	-0.00057268	-0.043846	-0.0051775	0.087497	0.096911	0.045901	-0.0066962	-0.005702
993	0.029146	-0.00064611	-0.042588	-0.0067949	0.087003	0.096693	0.044844	-0.0078039	-0.0067205
994	0.029039	-0.00052023	-0.043364	-0.0072556	0.087369	0.096551	0.043946	-0.0073209	-0.0059881
995	0.027242	-0.001193	-0.044679	-0.0074549	0.085206	0.093692	0.043641	-0.0086894	-0.007503
996	0.028042	0.0003252	-0.042796	-0.0070157	0.087869	0.097893	0.044003	-0.0069408	-0.0066304
997	0.026968	-0.0028434	-0.045157	-0.0082955	0.084927	0.095837	0.042592	-0.0094748	-0.0073042
998	0.028224	-0.00092506	-0.045103	-0.0075021	0.08687	0.094455	0.043102	-0.0078926	-0.0063148
999	0.027151	-0.002605	-0.04545	-0.0079679	0.085515	0.095317	0.04321	-0.0079126	-0.0078554
1000	0.027405	-0.0012207	-0.044635	-0.008275	0.085737	0.095924	0.042863	-0.008935	-0.0080075
1001	0.026243	-0.0014987	-0.046566	-0.009593	0.083968	0.094744	0.042669	-0.0092325	-0.0075669
1002	0.027695	-0.00097084	-0.045323	-0.0085945	0.085635	0.094145	0.044903	-0.0082102	-0.0075073
1003	0.026572	-0.00072002	-0.045881	-0.0081034	0.08378	0.095006	0.044405	-0.0086846	-0.0091553
1004	0.029334	-0.00074148	-0.04422	-0.0065198	0.086659	0.095608	0.045983	-0.0072184	-0.0071912
1005	0.026641	-0.0023117	-0.04593	-0.009542	0.083292	0.091858	0.04317	-0.0088377	-0.0074129
1006	0.025763	-0.0024114	-0.046039	-0.009409	0.084241	0.092805	0.042849	-0.0095797	-0.0090766
1007	0.027051	-0.00092125	-0.046266	-0.0073996	0.083991	0.093027	0.043442	-0.010001	-0.0085144
1008	0.025667	-0.0029626	-0.047672	-0.0091071	0.082442	0.09175	0.04221	-0.010035	-0.0099792
1009	0.028324	-0.0014968	-0.044563	-0.0071101	0.085032	0.09463	0.045131	-0.0086594	-0.0069833
1010	0.027053	-0.0025353	-0.047175	-0.0099444	0.081746	0.09145	0.041159	-0.010729	-0.0096326
1011	0.025881	-0.0023317	-0.047815	-0.010235	0.082116	0.092126	0.039872	-0.010049	-0.010697
1012	0.026947	-0.0026331	-0.045899	-0.009407	0.081872	0.091031	0.041044	-0.0092163	-0.0094533
1013	0.024824	-0.00083113	-0.046505	-0.009871	0.082187	0.09133	0.040063	-0.009871	-0.0090566
1014	0.025388	-0.0031748	-0.048209	-0.0096369	0.079882	0.088374	0.040204	-0.010233	-0.0092683
1015	0.022873	-0.0054007	-0.047986	-0.011594	0.077235	0.088061	0.03762	-0.01059	-0.011075
1016	0.024817	-0.0014243	-0.046482	-0.0094724	0.080101	0.089763	0.041041	-0.0085073	-0.0085464
1017	0.02471	-0.0041113	-0.047143	-0.010552	0.079988	0.090835	0.040188	-0.011191	-0.010347
1018	0.024122	-0.0033894	-0.046755	-0.0099878	0.081006	0.089694	0.040607	-0.011556	-0.0087485
1019	0.025184	-0.0024443	-0.046808	-0.010692	0.081809	0.092405	0.041016	-0.011089	-0.0090446
1020	0.024854	-0.0015445	-0.046376	-0.0087862	0.079022	0.090317	0.039439	-0.010503	-0.0096869
1021	0.023536	-0.0035577	-0.046263	-0.011224	0.079295	0.090168	0.03941	-0.010485	-0.010214
1022	0.024631	-0.0028567	-0.047944	-0.010389	0.080702	0.087671	0.040072	-0.010411	-0.011343
1023	0.02556	-0.003974	-0.046687	-0.01048	0.078712	0.089995	0.039432	-0.011509	-0.011232
1024	0.023451	-0.0039163	-0.048353	-0.01114	0.077032	0.088504	0.037575	-0.011747	-0.010478
1025	0.024028	-0.0038276	-0.046399	-0.011808	0.078536	0.088417	0.039281	-0.010969	-0.011664
1026	0.020712	-0.0050726	-0.049653	-0.012104	0.077323	0.087164	0.038	-0.011984	-0.011107
1027	0.024083	-0.0045853	-0.047889	-0.010517	0.079031	0.087825	0.037911	-0.011449	-0.011724
1028	0.022192	-0.0053587	-0.049703	-0.012304	0.076793	0.086755	0.036579	-0.012121	-0.012864
1029	0.02498	-0.0013309	-0.04552	-0.0093904	0.082237	0.090197	0.039786	-0.0099554	-0.0094981
1030	0.022362	-0.0064745	-0.047965	-0.012712	0.076186	0.085868	0.035233	-0.014724	-0.011622
1031	0.022305	-0.0019441	-0.048277	-0.011809	0.074819	0.089164	0.03536	-0.012702	-0.011648
1032	0.021605	-0.0012102	-0.04723	-0.013202	0.07847	0.08724	0.038921	-0.010385	-0.0088935
1033	0.024288	-0.000669	-0.046127	-0.010253	0.079568	0.08913	0.038429	-0.011004	-0.0090756
1034	0.021146	-0.0041504	-0.049192	-0.013952	0.07524	0.085152	0.034582	-0.012603	-0.012029
1035	0.026159	-0.0023079	-0.045989	-0.011425	0.078254	0.085218	0.041152	-0.011391	-0.0091443
1036	0.020434	-0.0067048	-0.051351	-0.014426	0.071459	0.083735	0.033573	-0.014627	-0.014601
1037	0.021888	-0.0049691	-0.048006	-0.012378	0.073808	0.083974	0.03757	-0.013017	-0.012503
1038	0.018898	-0.0073781	-0.050286	-0.015947	0.072497	0.080601	0.034917	-0.016815	-0.014807
1039	0.022311	-0.0039849	-0.046808	-0.011216	0.076369	0.083826	0.037143	-0.011302	-0.01235
1040	0.022932	-0.0033712	-0.048387	-0.013662	0.071682	0.080741	0.035199	-0.013634	-0.012004
1041	0.020904	-0.0030241	-0.049489	-0.012912	0.074106	0.083557	0.035861	-0.013564	-0.011057
1042	0.021784	-0.0059228	-0.048276	-0.013492	0.075082	0.082193	0.034616	-0.013591	-0.011035
1043	0.020677	-0.0063729	-0.049557	-0.012687	0.068916	0.076586	0.033151	-0.015324	-0.013665
1044	0.020573	-0.0050793	-0.047684	-0.015486	0.073645	0.080004	0.034669	-0.012847	-0.013971
1045	0.024045	-0.001215	-0.047956	-0.011353	0.07381	0.081649	0.036772	-0.011123	-0.010956
1046	0.021523	-0.0031657	-0.04752	-0.013086	0.071788	0.083216	0.035393	-0.013782	-0.014233
1047	0.018292	-0.003696	-0.045753	-0.012732	0.074746	0.08423	0.034277	-0.015776	-0.010122
1048	0.021852	-0.0014873	-0.046932	-0.011172	0.075522	0.082262	0.038478	-0.012567	-0.011202
1049	0.021003	-0.0065613	-0.049153	-0.013745	0.073068	0.078615	0.034251	-0.016362	-0.01497
1050	0.018086	-0.0067253	-0.052255	-0.015057	0.070153	0.07606	0.029874	-0.016388	-0.016766
1051	0.021012	-0.004518	-0.048925	-0.015941	0.071136	0.079029	0.030265	-0.016419	-0.015174
1052	0.021395	-0.0059013	-0.046708	-0.011821	0.072943	0.081867	0.034115	-0.011763	-0.011866
1053	0.023363	-0.007884	-0.047377	-0.014331	0.069845	0.078547	0.032668	-0.018212	-0.011666
1054	0.020407	-0.0090742	-0.052192	-0.015731	0.070356	0.077266	0.030617	-0.015829	-0.016245
1055	0.020313	-0.004252	-0.047456	-0.012621	0.072137	0.081297	0.035864	-0.014284	-0.012078
1056	0.019544	-0.0030618	-0.045175	-0.012285	0.074363	0.081893	0.034879	-0.013863	-0.015423
1057	0.020056	-0.0050464	-0.047679	-0.017292	0.067686	0.079213	0.033429	-0.017053	-0.013374
1058	0.021851	-0.0074034	-0.048747	-0.013971	0.069502	0.078876	0.034245	-0.015214	-0.009778
1059	0.021795	-0.0065522	-0.047087	-0.01444	0.072799	0.082437	0.037921	-0.01226	-0.012351
1060	0.022949	-0.001585	-0.048371	-0.016667	0.068713	0.08079	0.034118	-0.018022	-0.015241
1061	0.019238	-0.0070982	-0.049206	-0.014933	0.071657	0.081449	0.031883	-0.01515	-0.012372
1062	0.020105	-0.0047956	-0.048887	-0.014655	0.068745	0.078694	0.02964	-0.017526	-0.01668
1063	0.018472	-0.0062342	-0.051073	-0.019454	0.066658	0.077096	0.029696	-0.017534	-0.013643
1064	0.020322	-0.0089965	-0.048583	-0.014584	0.06879	0.075261	0.033781	-0.016168	-0.014157
1065	0.018552	-0.007297	-0.05088	-0.018347	0.067097	0.073471	0.030173	-0.018471	-0.018496
1066	0.020234	-0.0097399	-0.051851	-0.017017	0.066736	0.075107	0.030572	-0.021158	-0.017678
1067	0.019475	-0.0079618	-0.053211	-0.014632	0.067196	0.076446	0.029333	-0.01736	-0.013653
1068	0.025608	-0.0093317	-0.046977	-0.015239	0.071689	0.075883	0.029849	-0.015194	-0.01511
1069	0.019716	-0.0072551	-0.051584	-0.015263	0.064923	0.073746	0.032224	-0.016952	-0.016947
1070	0.021901	-0.0048332	-0.047446	-0.016223	0.066308	0.074375	0.026908	-0.014509	-0.014469
1071	0.021091	-0.008009	-0.052603	-0.016985	0.063317	0.076625	0.030206	-0.016404	-0.017109
1072	0.01509	-0.010259	-0.054739	-0.023829	0.065917	0.075704	0.02596	-0.019891	-0.024203
1073	0.019218	-0.006331	-0.051142	-0.016156	0.071925	0.076945	0.030204	-0.016617	-0.012191
1074	0.017749	-0.009069	-0.050336	-0.016832	0.067429	0.077318	0.029586	-0.020138	-0.017282
1075	0.016712	-0.0046711	-0.048769	-0.015659	0.069665	0.076751	0.029201	-0.014089	-0.015992
1076	0.018632	-0.0066295	-0.053011	-0.017019	0.068415	0.076049	0.027891	-0.014858	-0.013494
1077	0.019824	-0.0067387	-0.051229	-0.018969	0.067879	0.075668	0.029136	-0.01922	-0.017245
1078	0.018333	-0.0093298	-0.049597	-0.016417	0.064553	0.07534	0.030035	-0.016464	-0.017319
1079	0.020072	-0.0044594	-0.047275	-0.01438	0.067523	0.075969	0.032218	-0.013099	-0.014584
1080	0.0162	-0.011195	-0.05187	-0.01716	0.065007	0.076153	0.026288	-0.02122	-0.017488
1081	0.021452	-0.0066233	-0.052371	-0.01373	0.070766	0.073418	0.031411	-0.020217	-0.015978
1082	0.014663	-0.0092568	-0.05396	-0.02219	0.062846	0.072057	0.022844	-0.021289	-0.022058
1083	0.012342	-0.013245	-0.059768	-0.022658	0.056162	0.062781	0.018413	-0.023734	-0.02131
1084	0.021991	-0.0022941	-0.053071	-0.017307	0.070701	0.075994	0.029657	-0.012177	-0.016427
1085	0.014962	-0.012472	-0.056322	-0.017384	0.064207	0.072877	0.025615	-0.024714	-0.019376
1086	0.020467	-0.0020471	-0.052158	-0.017972	0.065428	0.072746	0.029256	-0.015937	-0.010419
1087	0.019899	-0.0038209	-0.055007	-0.019288	0.065174	0.076483	0.027555	-0.01861	-0.014129
1088	0.013177	-0.010933	-0.056266	-0.021486	0.063372	0.071637	0.027476	-0.019304	-0.021031
1089	0.019423	-0.005157	-0.052769	-0.020721	0.063134	0.08219	0.027665	-0.021094	-0.015199
1090	0.0174	-0.0097404	-0.05674	-0.018633	0.063133	0.07275	0.031581	-0.019776	-0.016095
1091	0.01493	-0.0085077	-0.05532	-0.01783	0.065731	0.074276	0.02939	-0.014997	-0.019148
1092	0.0064883	-0.016131	-0.061467	-0.029737	0.06062	0.069946	0.018373	-0.024507	-0.018845
1093	0.015571	-0.01073	-0.055952	-0.021461	0.055475	0.075627	0.02436	-0.018811	-0.02218
1094	0.014885	-0.0089188	-0.061577	-0.023484	0.056898	0.068642	0.025185	-0.021879	-0.021618
1095	0.020328	-0.0069051	-0.057719	-0.024632	0.062365	0.070542	0.022466	-0.021612	-0.016237
1096	0.016888	-0.008503	-0.053169	-0.020497	0.066814	0.074182	0.028478	-0.013957	-0.01661
1097	0.015696	-0.012754	-0.060964	-0.021205	0.058627	0.067097	0.025878	-0.02109	-0.020791
1098	0.013301	-0.013949	-0.056374	-0.02188	0.051081	0.072904	0.026561	-0.013824	-0.014719
1099	0.0082045	-0.018694	-0.060808	-0.033143	0.044792	0.065417	0.020533	-0.023905	-0.018532
1100	0.015821	-0.0048027	-0.049339	-0.024589	0.071874	0.072842	0.034484	-0.014633	-0.017402
