# Supplementary material for: Reversing protonation of weakly basic drugs greatly enhances intracellular diffusion and decreases lysosomal sequestration
Source: eLife. 2024 Dec 6;13:RP97255. doi: 10.7554/eLife.97255 (PMC11623935; doi:10.7554/eLife.97255)
Supplement: Figure 3—source data 1. [file elife-97255-fig3-data1.xlsx]

## Sheet: 3A
Time axis (re-adjusted)	Pre-Bleach	PBS	Cytoplasm	Nucleus	Hela Cell extract
-13.261	1						Fluorescein
-11.788	0.97303
10.314	0.97311
-8.8408	0.96672
-7.3674	0.98315
-5.8939	0.98206
-4.4204	0.98772
-2.9469	0.98453
-1.4735	0.98658
0		0.14797	0.22062	0.27885	0.12044
1.4735		0.21693	0.2758	0.30874	0.2202
2.9469		0.25966	0.30041	0.35438	0.25965
4.4204		0.30902	0.34012	0.37155	0.31474
5.8939		0.33401	0.34675	0.41953	0.35019
7.3674		0.36966	0.38075	0.46055	0.3587
8.8408		0.38978	0.40299	0.49612	0.39162
10.314		0.40371	0.40987	0.50823	0.42184
11.788		0.42874	0.44348	0.49702	0.44509
13.261		0.43849	0.44499	0.53026	0.47214
14.735		0.4723	0.45431	0.54094	0.48289
16.208		0.47147	0.49491	0.54868	0.48221
17.682		0.48696	0.49694	0.57678	0.4954
19.155		0.49161	0.50464	0.5927	0.52833
20.629		0.51305	0.50705	0.59385	0.53129
22.102		0.52086	0.53065	0.59246	0.53288
23.576		0.53281	0.53605	0.62561	0.55886
25.049		0.53772	0.54603	0.62722	0.55853
26.523		0.54248	0.58415	0.65165	0.56394
27.996		0.5712	0.55519	0.63925	0.59709
29.469		0.55829	0.57193	0.66104	0.60328
30.943		0.57493	0.59113	0.65427	0.59429
32.416		0.56925	0.57692	0.66462	0.61188
33.89		0.59678	0.60326	0.67047	0.61826
35.363		0.59677	0.60645	0.66815	0.62081
36.837		0.60235	0.60838	0.70903	0.62707
38.31		0.61057	0.62315	0.69857	0.63188
39.784		0.60849	0.60706	0.69657	0.6431
41.257		0.62755	0.61147	0.71429	0.66244
42.731		0.62959	0.62566	0.72727	0.65698
44.204		0.63768	0.6419	0.71366	0.65838
45.678		0.62847	0.63361	0.7336	0.68183
47.151		0.66216	0.64584	0.72536	0.67417
48.625		0.65286	0.66404	0.75548	0.6831
50.098		0.64445	0.65844	0.74316	0.67932
51.572		0.65544	0.66483	0.74793	0.6733
53.045		0.65674	0.66105	0.74851	0.69565
54.519		0.66631	0.65572	0.761	0.69554
55.992		0.67361	0.65635	0.75323	0.69785
57.465		0.67613	0.69	0.77498	0.69035
58.939		0.67299	0.66986	0.75207	0.68715
60.412		0.66917	0.68973	0.77497	0.7085
61.886		0.68342	0.69878	0.80497	0.71235
63.359		0.67621	0.67891	0.76515	0.72669
64.833		0.69928	0.68564	0.77479	0.71814
66.306		0.70069	0.69748	0.79596	0.71432
67.78		0.71607	0.70048	0.80874	0.73901
69.253		0.69998	0.72004	0.79661	0.7139
70.727		0.71047	0.6971	0.80864	0.72191
72.2		0.70947	0.71909	0.79582	0.75709
73.674		0.70498	0.71166	0.81334	0.7213
75.147		0.7247	0.7204	0.77921	0.75491
76.621		0.70586	0.69396	0.82449	0.76388
78.094		0.71557	0.73092	0.79858	0.75221
79.568		0.71776	0.72732	0.81696	0.7496
81.041		0.72317	0.70045	0.80608	0.7466
82.515		0.7337	0.72402	0.80654	0.75175
83.988		0.72774	0.71688	0.85248	0.75244
85.461		0.7239	0.73117	0.82058	0.76834
86.935		0.75875	0.74445	0.82788	0.76511
88.408		0.73887	0.74816	0.81536	0.77972
89.882		0.71992	0.74452	0.83581	0.76582
91.355		0.72982	0.73186	0.81315	0.77585
92.829		0.74117	0.74344	0.83465	0.76394
94.302		0.73953	0.73148	0.82984	0.7817
95.776		0.74965	0.72316	0.84993	0.78961
97.249		0.71827	0.74165	0.83804	0.80088
98.723		0.74756	0.76141	0.87033	0.78412
100.2		0.7496	0.74854	0.83761	0.78038
101.67		0.75542	0.72782	0.8756	0.79476
103.14		0.75893	0.75066	0.83608	0.79282
104.62		0.74703	0.73292	0.83098	0.7805
106.09		0.74429	0.76402	0.83037	0.78036
107.56		0.75287	0.76684	0.8373	0.80877
109.04		0.75845	0.7581	0.84994	0.80269
110.51		0.73881	0.75778	0.84633	0.82721
111.98		0.76161	0.76579	0.86049	0.79243
113.46		0.76901	0.78195	0.86437	0.79722
114.93		0.76577	0.77256	0.85738	0.8163
116.4		0.74935	0.77231	0.82698	0.80401
117.88		0.78238	0.78507	0.83875	0.80816
119.35		0.75518	0.75593	0.84692	0.80231
120.82		0.78078	0.78852	0.86799	0.81061
122.3		0.77441	0.77323	0.86173	0.80306
123.77		0.77741	0.78408	0.87386	0.81463
125.25		0.78004	0.77227	0.8398	0.82443
126.72		0.78801	0.78174	0.87488	0.83789
128.19		0.77732	0.79341	0.86903	0.82638
129.67		0.77115	0.77438	0.86893	0.81945
131.14		0.7855	0.77512	0.86411	0.83406
132.61		0.79506	0.79696	0.87367	0.84341
134.09		0.76981	0.75274	0.84649	0.84998
135.56		0.77892	0.7853	0.87113	0.8151
137.03		0.76324	0.78476	0.86797	0.83451
138.51		0.77658	0.79688	0.86059	0.85617
139.98		0.77708	0.79172	0.87225	0.83842
141.45		0.79339	0.77007	0.87144	0.84178
142.93		0.8063	0.76604	0.87048	0.82941
144.4		0.77494	0.79867	0.86921	0.8423
145.87		0.80123	0.77715	0.88359	0.82309
147.35		0.78541	0.78968	0.8814	0.86512
148.82		0.79503	0.80431	0.87278	0.86107
150.29		0.79062	0.79143	0.8806	0.82988
151.77		0.80681	0.81741	0.88709	0.8207
153.24		0.78688	0.78612	0.87649	0.83973
154.71		0.78869	0.79662	0.88941	0.87649
156.19		0.79336	0.80383	0.87293	0.83108
157.66		0.80749	0.81306	0.89368	0.82342
159.14		0.79064	0.78176	0.88903	0.86261
160.61		0.8188	0.80728	0.8973	0.85812
162.08		0.81141	0.80465	0.88168	0.86127
163.56		0.80644	0.81113	0.88669	0.87188
165.03		0.81655	0.82494	0.8912	0.85456
166.5		0.80349	0.80168	0.88602	0.85356
167.98		0.79663	0.79177	0.88498	0.86944
169.45		0.82373	0.80299	0.8935	0.85428
170.92		0.80743	0.80774	0.90169	0.8718
172.4		0.81862	0.79701	0.89055	0.86902
173.87		0.81196	0.80629	0.87827	0.85606
175.34		0.81695	0.81211	0.88461	0.88822
176.82		0.80886	0.79407	0.88724	0.83197
178.29		0.81566	0.80264	0.90114	0.85665
179.76		0.81188	0.79105	0.89403	0.87341
181.24		0.80809	0.81032	0.89491	0.85069
182.71		0.80484	0.8221	0.90203	0.85821
184.18		0.81013	0.78528	0.88008	0.85745
185.66		0.81699	0.78633	0.91529	0.86006
187.13		0.81679	0.82573	0.89518	0.86907
188.6		0.82531	0.8193	0.86729	0.87958
190.08		0.83984	0.83683	0.8812	0.85883
191.55		0.81627	0.81318	0.89459	0.87317
193.03		0.82494	0.81166	0.90856	0.87206
194.5		0.81799	0.81164	0.89695	0.86076
195.97		0.84305	0.80087	0.9137	0.86992
197.45		0.81412	0.8228	0.91694	0.86567
198.92		0.8237	0.82238	0.90133	0.89605
200.39		0.82386	0.84797	0.90734	0.89361
201.87		0.83525	0.82789	0.90808	0.90135
203.34		0.82312	0.81149	0.91641	0.88232
204.81		0.82545	0.82107	0.91587	0.89211
206.29		0.82988	0.84182	0.90504	0.86762
207.76		0.82019	0.8227	0.89916	0.87851
209.23		0.81562	0.80664	0.89277	0.89321
210.71		0.80659	0.82777	0.88879	0.86265
212.18		0.85125	0.83524	0.89482	0.89651
213.65		0.82833	0.82137	0.92642	0.89578
215.13		0.82666	0.8203	0.89419	0.88029
216.6		0.83146	0.82985	0.91152	0.89625
218.07		0.83375	0.8243	0.90617	0.88643
219.55		0.82664	0.82197	0.91091	0.87878
221.02		0.84483	0.81436	0.90949	0.90425
222.49		0.83992	0.82561	0.91301	0.90777
223.97		0.85181	0.83097	0.92337	0.90124
225.44		0.84349	0.82256	0.93732	0.89878
226.91		0.85704	0.83982	0.91145	0.86994
228.39		0.84253	0.84573	0.91204	0.89019
229.86		0.83049	0.83134	0.91131	0.8818
231.34		0.8297	0.83583	0.91195	0.8804
232.81		0.83705	0.81331	0.92141	0.89676
234.28		0.84095	0.84245	0.92855	0.90214
235.76		0.84634	0.83469	0.91635	0.91586
237.23		0.83034	0.83257	0.91525	0.90098
238.7		0.83455	0.82346	0.93192	0.87861
240.18		0.84442	0.84276	0.89778	0.90408
241.65		0.83767	0.85826	0.90683	0.88032
243.12		0.83945	0.84961	0.93643	0.89453
244.6		0.84813	0.84881	0.91989	0.89086
246.07		0.83741	0.81104	0.91602	0.9097
247.54		0.82066	0.82107	0.90718	0.92019
249.02		0.85553	0.84061	0.92524	0.89364
250.49		0.84834	0.82675	0.9095	0.91497
251.96		0.85219	0.83156	0.90988	0.90842
253.44		0.85508	0.83238	0.90665	0.89378
254.91		0.85397	0.83294	0.91104	0.89863
256.38		0.85451	0.83383	0.90784	0.91373
257.86		0.83647	0.83084	0.94129	0.91174
259.33		0.85314	0.85092	0.90153	0.91731
260.8		0.85173	0.85271	0.92722	0.9078
262.28		0.83748	0.83884	0.9254	0.9041
263.75		0.85589	0.83847	0.92197	0.90467
265.23		0.85876	0.83851	0.92386	0.90729
266.7		0.85187	0.86072	0.91999	0.87287
268.17		0.8479	0.85648	0.9324	0.92954
269.65		0.84491	0.83034	0.91439	0.87723
271.12		0.8565	0.83519	0.93838	0.92596
272.59		0.85582	0.83534	0.91224	0.94391
274.07		0.84939	0.85407	0.91608	0.88928
275.54		0.85291	0.84643	0.92382	0.92032
277.01		0.85031	0.85811	0.92772	0.91657
278.49		0.84712	0.84376	0.94033	0.89849
279.96		0.84756	0.86866	0.92042	0.89484
281.43		0.84525	0.83814	0.92191	0.90794
282.91		0.86966	0.85543	0.94947	0.91735
284.38		0.85075	0.85395	0.91928	0.90899
285.85		0.86276	0.84517	0.91038	0.91442
287.33		0.85495	0.84818	0.93053	0.89838
288.8		0.85206	0.82633	0.91595	0.90699
290.27		0.85027	0.83521	0.9225	0.90527
291.75		0.85853	0.8258	0.92029	0.9292
293.22		0.8682	0.8355	0.94528	0.91476
294.69		0.85506	0.86337	0.93821	0.91159
296.17		0.85606	0.84988	0.92506	0.91303
297.64		0.85298	0.86153	0.92829	0.91989
299.12		0.86548	0.86369	0.93382	0.8881
300.59		0.84329	0.81794	0.92185	0.92697
302.06		0.84195	0.85672	0.91801	0.89372
303.54		0.86064	0.8353	0.92851	0.92196
305.01		0.8447	0.82517	0.94063	0.91015
306.48		0.87433	0.8537	0.93275	0.93166
307.96		0.84302	0.84704	0.93424	0.89321
309.43		0.85457	0.84002	0.92956	0.90345
310.9		0.86641	0.84408	0.93482	0.91041
312.38		0.87282	0.84403	0.94356	0.92511
313.85		0.86525	0.8331	0.92166	0.92051
315.32		0.85835	0.85623	0.92364	0.91157
316.8		0.8692	0.85254	0.91508	0.91399
318.27		0.85956	0.84335	0.92916	0.91781
319.74		0.8699	0.86142	0.9604	0.92496
321.22		0.86412	0.84701	0.92648	0.9047
322.69		0.86447	0.852	0.93727	0.93612
324.16		0.88953	0.86363	0.94697	0.9108
325.64		0.85971	0.84502	0.93488	0.91007
327.11		0.86059	0.85754	0.93453	0.94194
328.58		0.84976	0.85472	0.93921	0.92547
330.06		0.88091	0.86643	0.94776	0.90498
331.53		0.85829	0.84583	0.92421	0.94562
333.01		0.84823	0.86576	0.92894	0.90972
334.48		0.87157	0.86248	0.93862	0.93028
335.95		0.87479	0.84689	0.93784	0.93643
337.43		0.85445	0.84972	0.90652	0.91344
338.9		0.86199	0.85884	0.9128	0.92269
340.37		0.87378	0.8648	0.91707	0.90791
341.85		0.87544	0.85237	0.96358	0.92046
343.32		0.88283	0.84282	0.93719	0.92206
344.79		0.87346	0.87148	0.91278	0.90954
346.27		0.8802	0.85467	0.94938	0.92558
347.74		0.86633	0.85615	0.9273	0.92741
349.21		0.87733	0.86131	0.93647	0.93434
350.69		0.86592	0.86352	0.93558	0.93917
352.16		0.87706	0.88519	0.95487	0.95081
353.63		0.85383	0.84869	0.93539	0.92626
355.11		0.84119	0.86888	0.91913	0.9332
356.58		0.86247	0.83899	0.95066	0.92155
358.05		0.86656	0.85274	0.94654	0.94053
359.53		0.88398	0.84184	0.91462	0.94837
361		0.86169	0.85604	0.94988	0.92892
362.47		0.87388	0.83751	0.92643	0.92022
363.95		0.88276	0.85042	0.92746	0.93015
365.42		0.88039	0.85982	0.93244	0.92001
366.89		0.88048	0.86547	0.91894	0.90841
368.37		0.88302	0.87175	0.96268	0.94194
369.84		0.87718	0.85642	0.9236	0.91393
371.32		0.87494	0.88124	0.94604	0.93617
372.79		0.87811	0.86085	0.9457	0.93834
374.26		0.87441	0.85623	0.95056	0.93924
375.74		0.86103	0.86704	0.94752	0.93682
377.21		0.87665	0.86245	0.93062	0.93285
378.68		0.88428	0.85164	0.93017	0.91593
380.16		0.89413	0.85675	0.93156	0.93454
381.63		0.88582	0.88771	0.93191	0.92712
383.1		0.88228	0.87856	0.93835	0.93054
384.58		0.89132	0.87231	0.92601	0.9545
386.05		0.87695	0.85432	0.93317	0.93459
387.52		0.89256	0.87184	0.93764	0.92701
389		0.86869	0.86148	0.95809	0.93393
390.47		0.88466	0.84852	0.95767	0.93644
391.94		0.87531	0.87235	0.94168	0.91168
393.42		0.87564	0.88314	0.94474	0.91095
394.89		0.85898	0.85874	0.94892	0.94502
396.36		0.8801	0.86468	0.92303	0.92744
397.84		0.88873	0.8662	0.93139	0.91713
399.31		0.88353	0.84769	0.93457	0.92327
400.78		0.88087	0.86014	0.93253	0.92922
402.26		0.89529	0.85083	0.95914	0.92463
403.73		0.88954	0.85092	0.94461	0.95061
405.21		0.88908	0.86368	0.9288	0.92094
406.68		0.86914	0.86432	0.94555	0.92625
408.15		0.89024	0.87449	0.92801	0.94832
409.63		0.87089	0.86128	0.9304	0.92864
411.1		0.89094	0.86279	0.94591	0.9462
412.57		0.88759	0.84561	0.94422	0.94015
414.05		0.8766	0.84855	0.93314	0.93526
415.52		0.88579	0.86782	0.94138	0.96248
416.99		0.88478	0.87016	0.94349	0.9329
418.47		0.88609	0.88137	0.94927	0.93454
419.94		0.88421	0.87405	0.9356	0.92907
421.41		0.89449	0.87039	0.95286	0.94814
422.89		0.887	0.84393	0.93528	0.94229
424.36		0.88382	0.85933	0.95578	0.91376
425.83		0.88957	0.85338	0.95039	0.95275
427.31		0.88078	0.86875	0.94238	0.94847
428.78		0.89336	0.85718	0.96699	0.93154
430.25		0.87605	0.87523	0.93852	0.95591
431.73		0.87429	0.8504	0.95065	0.92798
433.2		0.89082	0.8983	0.94554	0.94747
434.67		0.87602	0.85899	0.95716	0.92508
436.15		0.88414	0.86453	0.93678	0.92661
437.62		0.90637	0.8781	0.9448	0.94311
439.1		0.88683	0.86135	0.94532	0.96519
440.57		0.87103	0.84781	0.95087	0.94484
442.04		0.88756	0.84806	0.96014	0.9385
443.52		0.8884	0.86445	0.943	0.93499
444.99		0.87704	0.86475	0.9344	0.92341
446.46		0.9097	0.85004	0.95091	0.94004
447.94		0.88651	0.86525	0.94108	0.93582
449.41		0.90255	0.85093	0.94635	0.93677
450.88		0.88738	0.85554	0.94381	0.94152
452.36		0.87129	0.87096	0.9626	0.94815
453.83		0.88647	0.86636	0.94224	0.94061
455.3		0.88745	0.85425	0.9435	0.94411
456.78		0.8848	0.87664	0.94676	0.92583
458.25		0.86969	0.88899	0.9299	0.96517
459.72		0.88713	0.85582	0.94082	0.94452
461.2		0.88365	0.85023	0.94767	0.95269
462.67		0.88838	0.86106	0.95292	0.96153
464.14		0.89333	0.86131	0.92113	0.93427
465.62		0.8932	0.86782	0.96598	0.93278
467.09		0.8827	0.86275	0.94475	0.9603
468.56		0.88135	0.87138	0.95539	0.94526
470.04		0.8902	0.85657	0.95708	0.96105
471.51		0.9141	0.85142	0.98095	0.95626
472.98		0.88383	0.88257	0.93413	0.92221
474.46		0.89189	0.88212	0.94896	0.97017
475.93		0.87248	0.85907	0.94675	0.92835
477.41		0.88196	0.87147	0.96139	0.9427
478.88		0.89369	0.86312	0.94757	0.93075
480.35		0.87402	0.86281	0.95806	0.93296
481.83		0.90006	0.86395	0.95183	0.97939
483.3		0.87585	0.85313	0.91444	0.93828
484.77		0.87787	0.87685	0.94945	0.93039
486.25		0.88185	0.86749	0.94917	0.96234
487.72		0.88509	0.86408	0.96281	0.97151
489.19		0.89191	0.8417	0.94613	0.96774
490.67		0.87889	0.87733	0.95308	0.94994
492.14		0.89236	0.86643	0.94921	0.96002
493.61		0.87624	0.8813	0.93422	0.9584
495.09		0.89131	0.89476	0.9379	0.93736
496.56		0.88767	0.8943	0.92588	0.91579
498.03		0.90169	0.85381	0.95196	0.93832
499.51		0.89159	0.86871	0.94681	0.94401
500.98		0.87688	0.88922	0.96178	0.94508
502.45		0.89814	0.85578	0.95883	0.94198
503.93		0.88986	0.87856	0.95065	0.96459
505.4		0.90801	0.86991	0.95371	0.94372
506.87		0.88864	0.87287	0.94803	0.95996
508.35		0.88698	0.88249	0.93542	0.94835
509.82		0.89336	0.87747	0.92358	0.93209
511.3		0.88192	0.84081	0.9584	0.9647
512.77		0.90421	0.85666	0.94975	0.95076
514.24		0.90453	0.88085	0.94294	0.93722
515.72		0.88167	0.86525	0.94682	0.97819
517.19		0.87987	0.88401	0.96793	0.98048
518.66		0.89812	0.85485	0.94894	0.94227
520.14		0.89392	0.87062	0.96303	0.9538
521.61		0.90556	0.87627	0.96582	0.94984
523.08		0.88869	0.86693	0.93795	0.94676
524.56		0.89915	0.8651	0.95039	0.92691
526.03		0.88589	0.86461	0.9494	0.95734
527.5		0.89313	0.86125	0.9594	0.9507
528.98		0.90008	0.89541	0.94387	0.94183
530.45		0.90518	0.88539	0.94969	0.94982
531.92		0.8835	0.85594	0.93299	0.96037
533.4		0.91744	0.86537	0.92333	0.95221
534.87		0.88497	0.87412	0.95747	0.93219
536.34		0.88727	0.86813	0.96381	0.94033
537.82		0.89205	0.86294	0.94661	0.94725
539.29		0.90032	0.86255	0.96381	0.96012
540.76		0.89609	0.86295	0.96995	0.95231
542.24		0.88717	0.89325	0.96016	0.94898
543.71		0.88549	0.87037	0.9598	0.98118
545.19		0.88373	0.86518	0.95991	0.97644
546.66		0.89023	0.86234	0.96113	0.96427
548.13		0.90018	0.86947	0.95638	0.94584
549.61		0.90267	0.88046	0.9605	0.97289
551.08		0.90943	0.88668	0.95755	0.9563
552.55		0.89324	0.86051	0.94248	0.94192
554.03		0.89459	0.89665	0.94346	0.95394
555.5		0.89118	0.87152	0.94575	0.97564
556.97		0.89696	0.86374	0.97801	0.9493
558.45		0.88797	0.86862	0.97719	0.96841
559.92		0.90406	0.87887	0.95329	0.92217
561.39		0.90657	0.88014	0.97187	0.96938
562.87		0.89838	0.88387	0.95556	0.97033
564.34		0.89039	0.86621	0.92893	0.94643
565.81		0.89625	0.87138	0.95127	0.96909
567.29		0.89162	0.8643	0.95471	0.95564
568.76		0.90069	0.86904	0.95369	0.95591
570.23		0.89705	0.8855	0.93878	0.96524
571.71		0.87765	0.86133	0.95328	0.96677
573.18		0.91359	0.87971	0.95683	0.96423
574.65		0.90588	0.8739	0.95757	0.95989
576.13		0.91277	0.87986	0.94829	0.93556
577.6		0.88807	0.88437	0.97298	0.96465
579.08		0.88518	0.87548	0.94686	0.96742
580.55		0.90451	0.89076	0.95899	0.96328
582.02		0.91176	0.89076	0.97858	0.9441
583.5		0.90317	0.86589	0.96096	0.97303
584.97		0.90736	0.8658	0.96486	0.95461
586.44		0.89608	0.87981	0.94874	0.95628
587.92		0.90009	0.87031	0.96627	0.95753
589.39		0.90349	0.85205	0.96455	0.94926
590.86		0.90196	0.88627	0.95424	0.95347
592.34		0.90012	0.8733	0.94856	0.96463
593.81		0.8953	0.86668	0.95673	0.92635
595.28		0.89667	0.88216	0.94629	0.95875
596.76		0.91661	0.8769	0.94601	0.97175
598.23		0.88887	0.87602	0.95779	0.96732
599.7		0.90097	0.88448	0.9553	0.9592
601.18		0.9048	0.86402	0.94897	0.9519
602.65		0.88131	0.88181	0.9599	0.95087
604.12		0.92011	0.89104	0.96865	0.93186
605.6		0.91604	0.87003	0.94071	0.96088
607.07		0.9139	0.87829	0.96738	0.94335
608.54		0.88429	0.86966	0.96637	0.95551
610.02		0.89994	0.88233	0.94094	0.93497
611.49		0.90216	0.88507	0.95608	0.96206
612.96		0.8958	0.86947	0.9578	0.95333
614.44		0.89742	0.89589	0.9635	0.9808
615.91		0.89458	0.87348	0.96819	0.982
617.39		0.90674	0.87152	0.93234	0.94817
618.86		0.89598	0.86479	0.96148	0.97277
620.33		0.92565	0.87884	0.95409	0.98272
621.81		0.89116	0.8762	0.95684	0.95549
623.28		0.8937	0.87398	0.95082	0.9566
624.75		0.90241	0.89155	0.9416	0.93439
626.23		0.91498	0.84642	0.94688	0.96358
627.7		0.91463	0.89038	0.9633	0.96442
629.17		0.88726	0.85958	0.95145	0.94919
630.65		0.91501	0.88452	0.93139	1.0055
632.12		0.91105	0.8886	0.9578	0.96179
633.59		0.90717	0.87429	0.95625	0.92333
635.07		0.90851	0.89607	0.95178	0.96379
636.54		0.89728	0.86263	0.94966	0.95049
638.01		0.91808	0.86688	0.95706	0.97102
639.49		0.90488	0.88321	0.95598	0.94566
640.96		0.9015	0.8694	0.93691	0.96187
642.43		0.91452	0.87371	0.94657	0.95174
643.91		0.88527	0.8909	0.95818	0.95949
645.38		0.89903	0.89346	0.96927	0.96068
646.85		0.90123	0.8842	0.96956	0.97996
648.33		0.90648	0.86924	0.97687	0.96484
649.8		0.92165	0.88077	0.93809	0.96375
651.28		0.87929	0.8819	0.95294	0.96949
652.75		0.89401	0.86665	0.96367	0.97538
654.22		0.8997	0.87417	0.9551	0.93692
655.7		0.89994	0.89134	0.95415	0.97079
657.17		0.92824	0.89425	0.93732	0.96281
658.64		0.90471	0.89692	0.95971	0.9595
660.12		0.91951	0.87094	0.94893	0.9931
661.59		0.90774	0.89643	0.94881	0.98259
663.06		0.90153	0.88121	0.97514	0.9679
664.54		0.90769	0.87257	0.96256	0.97936
666.01		0.90015	0.87306	0.94508	0.93722
667.48		0.9043	0.8763	0.94892	0.97227
668.96		0.91901	0.88469	0.95863	0.95575
670.43		0.91327	0.88233	0.95553	0.95783
671.9		0.9098	0.87661	0.96756	0.97493
673.38		0.90118	0.88999	0.9421	0.97843
674.85		0.90887	0.88001	0.95541	0.98106
676.32		0.89702	0.88233	0.92706	0.99331
677.8		0.89518	0.89206	0.94959	0.97972
679.27		0.92057	0.89898	0.96708	0.98085
680.74		0.90799	0.88023	0.91426	0.94126
682.22		0.90858	0.87889	0.97363	0.98463
683.69		0.90435	0.8669	0.95143	0.97045
685.17		0.92144	0.89098	0.95743	0.95712
686.64		0.89235	0.87476	0.9685	0.94505
688.11		0.8882	0.87299	0.95699	0.9393
689.59		0.89551	0.88594	0.9717	0.97905
691.06		0.91839	0.88159	0.96864	0.97752
692.53		0.88458	0.88773	0.93632	0.97483
694.01		0.92188	0.88883	0.96486	0.94945
695.48		0.90213	0.87572	0.96015	0.95834
696.95		0.92303	0.87456	0.94812	0.9628
698.43		0.8967	0.86552	0.93589	0.95407
699.9		0.91619	0.86233	0.98421	0.96299
701.37		0.9106	0.86442	0.94827	0.95388
702.85		0.92212	0.88226	0.93539	0.96257
704.32		0.91879	0.87958	0.94919	0.95795
705.79		0.90736	0.85208	0.97005	0.96368
707.27		0.9219	0.88117	0.93596	0.95645
708.74		0.9182	0.8887	0.97158	0.93413
710.21		0.90799	0.89088	0.96517	0.99699
711.69		0.91608	0.88092	0.94628	0.95974
713.16		0.91417	0.87533	0.93539	0.97548
714.63		0.91503	0.87877	0.9672	0.9813
716.11		0.91364	0.86673	0.95825	0.98927
717.58		0.90782	0.89808	0.98168	0.96615
719.06		0.9189	0.86574	0.94447	0.96628
720.53		0.90139	0.88083	0.94234	0.9493
722		0.91205	0.87469	0.97352	0.96134
723.48		0.91577	0.87871	0.93552	0.94035
724.95		0.90587	0.8749	0.9598	0.98784
726.42		0.90537	0.87609	0.96428	0.97517
727.9		0.90552	0.87146	0.95464	0.9774
729.37		0.90032	0.88549	0.97512	0.96884
730.84		0.91933	0.88402	0.93625	0.97705
732.32		0.93221	0.86987	0.966	0.9893
733.79		0.89557	0.87996	0.97484	0.9566
735.26		0.91698	0.89031	0.9544	0.94512
736.74		0.91709	0.90186	0.96349	0.94073
738.21		0.8975	0.88489	0.95006	0.97352
739.68		0.91626	0.89707	0.96588	0.95895
741.16		0.90488	0.8836	0.96639	0.95762
742.63		0.90475	0.8969	0.94285	0.97847
744.1		0.90093	0.88568	0.95474	0.98743
745.58		0.89696	0.88524	0.96947	0.95899
747.05		0.90464	0.88222	0.96355	0.96802
748.52		0.91307	0.85799	0.95533	0.95598
750		0.91965	0.86824	0.937	0.96231
751.47		0.91374	0.87478	0.95337	0.98537
752.94		0.92998	0.8939	0.94322	0.99393
754.42		0.90431	0.90866	0.95291	0.97886
755.89		0.91246	0.89027	0.94324	0.95024
757.37		0.92183	0.88547	0.96105	0.9655
758.84		0.91697	0.89757	0.9249	0.9679
760.31		0.89791	0.86659	0.96168	0.99446
761.79		0.90541	0.86497	0.97293	0.97752
763.26		0.89547	0.87367	0.93736	0.98552
764.73		0.91036	0.88416	0.95358	0.98589
766.21		0.9086	0.87359	0.95494	0.96291
767.68		0.90148	0.88474	0.96357	0.95068
769.15		0.91026	0.88111	0.97263	0.96258
770.63		0.93105	0.88451	0.94904	0.99668
772.1		0.90961	0.87563	0.9547	0.94127
773.57		0.90573	0.88975	0.95773	0.97006
775.05		0.90691	0.87128	0.93711	0.97365
776.52		0.88706	0.88476	0.96056	0.96237
777.99		0.90234	0.87689	0.96602	0.97257
779.47		0.91425	0.88867	0.96847	0.96483
780.94		0.9203	0.88388	0.9729	0.96615
782.41		0.89907	0.87717	0.95701	0.97191
783.89		0.91704	0.89837	0.95181	0.96248
785.36		0.90867	0.88808	0.96228	0.94998
786.83		0.92098	0.87601	0.96211	0.95678
788.31		0.91379	0.89439	0.94637	0.96638
789.78		0.91757	0.8917	0.95988	0.96717
791.26		0.90793	0.88798	0.96804	0.96553
792.73		0.90859	0.88407	0.93645	0.99016
794.2		0.91195	0.88132	0.9681	0.95761
795.68		0.9112	0.89028	0.95086	0.97218
797.15		0.91557	0.88301	0.95681	0.99522
798.62		0.91802	0.8706	0.94489	0.95653
800.1		0.89863	0.8886	0.97743	0.96458
801.57		0.92337	0.88134	0.93944	0.97735
803.04		0.92129	0.90219	0.94279	0.97293
804.52		0.90612	0.88692	0.93382	0.95404
805.99		0.91542	0.8708	0.96083	0.99876
807.46		0.92604	0.87929	0.96935	0.97424
808.94		0.91275	0.85913	0.95729	0.96463
810.41		0.93834	0.87274	0.96967	0.97647
811.88		0.91506	0.86255	0.98339	0.98164
813.36		0.90276	0.8908	0.97256	0.9446
814.83		0.90983	0.87594	0.95235	0.99498
816.3		0.92237	0.86633	0.9485	0.96472
817.78		0.90522	0.87467	0.94699	0.95044
819.25		0.91489	0.90207	0.96005	0.9744
820.72		0.89577	0.89032	0.94551	0.97018
822.2		0.9168	0.90409	0.95723	0.99377
823.67		0.90921	0.88256	0.95419	0.98211
825.15		0.91722	0.86157	0.94244	1.0024
826.62		0.90414	0.88965	0.9396	0.99467
828.09		0.91509	0.89929	0.94103	0.96894
829.57		0.90329	0.88716	0.93556	0.93838
831.04		0.90466	0.88463	0.97444	1.0016
832.51		0.91981	0.88962	0.95611	0.96376
833.99		0.93063	0.87758	0.96109	0.98449
835.46		0.90394	0.88939	0.96571	0.97285
836.93		0.92485	0.91185	0.96517	0.98637
838.41		0.92316	0.88007	0.9398	0.9749
839.88		0.9251	0.88219	0.96179	0.97201
841.35		0.92125	0.89068	0.97329	0.96684
842.83		0.91243	0.86962	0.97699	0.97631
844.3		0.90731	0.89374	0.95522	0.98301
845.77		0.92336	0.88807	0.9567	0.96782
847.25		0.92028	0.86341	0.97288	0.97065
848.72		0.91971	0.87039	0.95886	0.97522
850.19		0.91512	0.89202	0.96144	0.94146
851.67		0.92519	0.84873	0.95563	0.95796
853.14		0.91673	0.88855	0.94299	0.97672
854.61		0.92307	0.88732	0.97279	0.95365
856.09		0.91999	0.88516	0.95367	0.9693
857.56		0.91125	0.89714	0.97147	0.95619
859.04		0.90733	0.86968	0.96481	0.98448
860.51		0.91169	0.84911	0.94161	0.98672
861.98		0.90382	0.86334	0.9668	0.96007
863.46		0.90518	0.89946	0.97908	1.0026
864.93		0.91334	0.89959	0.94273	0.98345
866.4		0.90333	0.86996	0.94175	0.97811
867.88		0.91716	0.87855	0.9405	0.94463
869.35		0.9366	0.87362	0.9301	0.98617
870.82		0.89803	0.90503	0.96276	0.96439
872.3		0.92039	0.89103	0.95234	0.97553
873.77		0.91462	0.88495	0.97701	0.9899
875.24		0.90431	0.90915	0.97722	0.99902
876.72		0.92108	0.90052	0.94737	0.98048
878.19		0.92269	0.87815	0.93139	0.96745
879.66		0.9121	0.90449	0.97472	0.94643
881.14		0.9068	0.88787	0.98198	0.95553
882.61		0.92491	0.90089	0.97165	0.98407
884.08		0.91878	0.88076	0.93523	0.99682
885.56		0.90901	0.88333	0.9449	0.98753
887.03		0.90598	0.88947	0.96837	0.98695
888.5		0.92398	0.87299	0.9486	0.98183
889.98		0.91415	0.89666	0.96438	0.97813
891.45		0.91777	0.87552	0.96961	0.99239
892.92		0.92542	0.87588	0.95869	0.98133
894.4		0.91438	0.87035	0.94925	0.97755
895.87		0.93162	0.86086	0.94085	0.96825
897.35		0.93766	0.89613	0.97155	0.95206
898.82		0.89056	0.89203	0.93793	0.97445
900.29		0.9243	0.86403	0.96285	0.96936
901.77		0.91985	0.87049	0.945	0.9907
903.24		0.89611	0.86511	0.9489	0.97966
904.71		0.94432	0.90583	0.95807	0.97049
906.19		0.93018	0.9054	0.96242	0.97702
907.66		0.9133	0.87761	0.97747	0.97784
909.13		0.92311	0.88326	0.94498	0.9747
910.61		0.90849	0.89812	0.95048	0.97259
912.08		0.91896	0.8983	0.96237	0.95472
913.55		0.92323	0.88054	0.97013	0.98058
915.03		0.91161	0.87698	0.95448	1.0015
916.5		0.90984	0.86092	0.93613	0.9725
917.97		0.9264	0.89906	0.96088	0.96965
919.45		0.90406	0.87595	0.97343	0.94275
920.92		0.91522	0.88339	0.94833	0.97667
922.39		0.92603	0.8917	0.97753	0.97252
923.87		0.91526	0.87088	0.9849	0.96532
925.34		0.93513	0.90122	0.977	1.0123
926.81		0.90732	0.84978	0.949	0.97075
928.29		0.9289	0.89948	0.9764	1.0015
929.76		0.90649	0.88951	0.946	0.97118
931.24		0.9184	0.89288	0.95658	0.96607
932.71		0.92037	0.89938	0.98126	0.99867
934.18		0.91633	0.89059	0.96537	0.97748
935.66		0.90877	0.86949	0.95355	0.98871
937.13		0.91933	0.90012	0.96491	1.0023
938.6		0.90299	0.88026	0.9494	0.98143
940.08		0.93345	0.87457	0.99176	0.95964
941.55		0.92705	0.89059	0.96084	0.97781
943.02		0.92573	0.87274	0.95722	0.95409
944.5		0.91347	0.88619	0.95577	0.96357
945.97		0.92537	0.89402	0.9503	0.99135
947.44		0.91461	0.88833	0.95728	0.99918
948.92		0.92134	0.88729	0.94246	0.98103
950.39		0.92676	0.88768	0.98798	0.98298
951.86		0.92094	0.88256	0.95608	0.99629
953.34		0.939	0.86012	0.93462	0.98149
954.81		0.89999	0.88766	0.96497	0.96775
956.28		0.92499	0.88204	0.96278	0.96869
957.76		0.92602	0.87938	0.96714	0.96007
959.23		0.9312	0.878	0.95588	0.95935
960.7		0.91018	0.88404	0.98055	0.99571
962.18		0.90885	0.88707	0.98032	0.97804
963.65		0.92156	0.8826	0.97106	0.99487
965.13		0.91445	0.89427	0.94591	0.96215
966.6		0.91241	0.90169	0.98048	0.96671
968.07		0.93247	0.89195	0.95312	0.96233
969.55		0.91068	0.89138	0.96091	1.0022
971.02		0.92617	0.84887	0.95263	0.9719
972.49		0.90781	0.89514	0.95446	1.0071
973.97		0.9222	0.8965	0.98223	0.9626
975.44		0.90685	0.88962	0.96273	0.97177
976.91		0.93043	0.88972	0.95301	0.9698
978.39		0.93309	0.87461	0.98476	0.98723
979.86		0.92871	0.90735	0.97235	0.99928
981.33		0.92773	0.88398	0.95586	0.96004
982.81		0.92056	0.89443	0.93427	0.96566
984.28		0.91116	0.89511	0.965	0.97561
985.75		0.91268	0.89523	0.95686	0.97606
987.23		0.93789	0.88384	0.95006	1.0058
988.7		0.92833	0.88529	0.9619	0.97636
990.17		0.91758	0.88311	0.9467	0.98275
991.65		0.9309	0.87182	0.95271	0.96184
993.12		0.932	0.8804	0.95949	0.9684
994.59		0.93949	0.87701	0.96178	0.97077
996.07		0.92005	0.88757	0.93522	0.94816
997.54		0.91764	0.90163	0.95461	0.99392
999.02		0.93053	0.87814	0.92736	1.0028
1000.5		0.93006	0.90621	0.96739	0.97398
1002		0.91123	0.8779	0.96486	0.98288
1003.4		0.92216	0.88228	0.9511	0.96489
1004.9		0.89499	0.886	0.97896	0.99223
1006.4		0.92192	0.86868	0.97776	0.95796
1007.9		0.92296	0.87372	0.96156	0.96489
1009.3		0.92245	0.87262	0.96086	0.95087
1010.8		0.90818	0.89239	0.94771	0.98677
1012.3		0.91163	0.87405	0.9714	0.99798
1013.7		0.92734	0.89336	0.93534	0.9976
1015.2		0.91171	0.90258	0.92406	0.973
1016.7		0.9202	0.88116	0.95996	0.98511
1018.2		0.92994	0.87638	0.95515	0.95188
1019.6		0.92294	0.86595	0.9738	0.97648
1021.1		0.91913	0.86822	0.96279	1.0023
1022.6		0.91095	0.89081	0.94634	0.96562
1024.1		0.91412	0.87946	0.96527	0.97011
1025.5		0.91563	0.88857	0.97062	1.0183
1027		0.92691	0.87706	0.93714	0.97963
1028.5		0.92853	0.88285	0.9789	0.95494
1030		0.9168	0.8937	0.96358	0.99035
1031.4		0.93014	0.88949	0.97785	0.98954
1032.9		0.92782	0.87791	0.96193	0.96817
1034.4		0.92437	0.89088	0.97657	0.96573
1035.9		0.93328	0.88344	0.98122	0.94866
1037.3		0.93057	0.88441	0.95864	0.95343
1038.8		0.92077	0.8853	0.96365	0.97631
1040.3		0.92279	0.88815	0.96608	0.99444
1041.7		0.91041	0.89281	0.96833	1.0162
1043.2		0.92035	0.86574	0.96287	0.97928
1044.7		0.92316	0.88022	0.93961	0.9706
1046.2		0.91386	0.89959	0.95051	0.98624
1047.6		0.91971	0.89014	0.96776	0.97822
1049.1		0.92312	0.87788	0.97089	0.98009
1050.6		0.9072	0.89459	0.96522	0.97828
1052.1		0.91305	0.89868	0.95373	0.97544
1053.5		0.91432	0.88604	0.96096	0.97574
1055		0.90982	0.887	0.92939	0.97558
1056.5		0.91958	0.84544	0.93918	0.96131
1058		0.92772	0.88999	0.95214	0.9834
1059.4		0.91835	0.86691	0.96124	1.0058
1060.9		0.9215	0.88668	0.95381	0.95787
1062.4		0.95382	0.88634	0.95595	0.9868
1063.8		0.92016	0.89333	0.9571	0.98887
1065.3		0.91052	0.8798	0.9413	0.97999
1066.8		0.93246	0.88759	0.95096	0.97718
1068.3		0.92978	0.88511	0.98257	0.9643
1069.7		0.92424	0.8875	0.95868	0.9947
1071.2		0.9215	0.89834	0.95055	0.98899
1072.7		0.93019	0.88225	0.95275	0.98817
1074.2		0.9306	0.88439	0.97086	0.9849
1075.6		0.9197	0.87163	0.95995	0.98718
1077.1		0.90789	0.89029	0.9857	0.98391
1078.6		0.90686	0.87558	0.95264	0.95508
1080.1		0.9343	0.8897	0.95067	1.0011
1081.5		0.9154	0.89508	0.94752	0.99065
1083		0.92142	0.88371	0.97134	0.95089
1084.5		0.91724	0.87992	0.94837	0.97023
1085.9		0.92828	0.86357	0.96157	0.95737
1087.4		0.91687	0.88528	0.95858	0.98794
1088.9		0.91957	0.87767	0.94548	0.97931
1090.4		0.91839	0.88208	0.96102	1.0251
1091.8		0.93724	0.88377	0.95762	0.95494
1093.3		0.92999	0.89015	0.95793	0.98861
1094.8		0.93115	0.89115	0.96975	0.99679
1096.3		0.91861	0.89248	0.94921	0.99863
1097.7		0.94754	0.90038	0.98871	0.97567
1099.2		0.92393	0.90454	0.96221	0.98682
1100.7		0.92776	0.87994	0.95136	0.96033
1102.2		0.91799	0.87477	0.95501	0.96923
1103.6		0.93483	0.8922	0.95942	0.97274
1105.1		0.93734	0.90595	0.95832	0.99154
1106.6		0.9093	0.90541	0.95721	0.9927
1108.1		0.91713	0.86828	0.97301	0.98879
1109.5		0.93491	0.8658	0.96153	0.955
1111		0.93322	0.89974	0.94421	0.98853
1112.5		0.93598	0.89326	0.95776	0.99516
1113.9		0.93257	0.88459	0.96021	0.97633
1115.4		0.93212	0.88733	0.97329	1.0042
1116.9		0.9157	0.89748	0.95867	0.97378
1118.4		0.92667	0.88909	0.95652	0.98942
1119.8		0.93144	0.90335	0.93895	0.96515
1121.3		0.92364	0.89031	0.96118	1.0172
1122.8		0.91795	0.89148	0.96304	0.97971
1124.3		0.92939	0.87824	0.97427	0.97786
1125.7		0.93442	0.90361	0.96625	0.97789
1127.2		0.91511	0.88895	0.96703	1.0125
1128.7		0.91876	0.86386	0.96063	0.96813
1130.2		0.91706	0.87678	0.95133	0.98114
1131.6		0.92558	0.90415	0.94319	0.98025
1133.1		0.93271	0.89299	0.95848	0.99919
1134.6		0.94199	0.88914	0.92641	1.0009
1136		0.92606	0.89386	0.96284	0.9964
1137.5		0.94415	0.87281	0.97571	0.99625
1139		0.91807	0.88144	0.96162	0.99645
1140.5		0.93377	0.87388	0.96951	0.97206
1141.9		0.92919	0.8891	0.96776	0.9846
1143.4		0.93411	0.87459	0.95705	0.99366
1144.9		0.92317	0.88618	0.96456	0.98275
1146.4		0.94636	0.88996	0.9225	0.971
1147.8		0.90875	0.895	0.9797	0.99652
1149.3		0.93376	0.89018	0.95705	0.95881
1150.8		0.91954	0.90923	0.94267	0.97856
1152.3		0.92624	0.88185	0.94169	0.9856
1153.7		0.91207	0.87716	0.94578	1.003
1155.2		0.92651	0.88345	0.96466	0.98513
1156.7		0.9231	0.85846	0.95655	0.99304
1158.2		0.92461	0.8841	0.94621	0.98586
1159.6		0.91145	0.89816	0.9753	0.98926
1161.1		0.93657	0.86052	0.9451	0.97054
1162.6		0.91503	0.86471	0.96954	0.96598
1164		0.93474	0.88085	0.95846	0.9828
1165.5		0.92074	0.86183	0.96324	0.97298
1167		0.93071	0.87547	0.97363	0.99624
1168.5		0.93394	0.87306	0.97951	0.98661
1169.9		0.95102	0.86775	0.9574	0.94357
1171.4		0.92794	0.87709	0.96652	0.95576
1172.9		0.93639	0.86148	0.97535	0.98039
1174.4		0.93626	0.88745	0.95437	0.97
1175.8		0.93538	0.89346	0.9657	0.97291
1177.3		0.92093	0.88658	0.97178	0.976
1178.8		0.92956	0.88578	0.96424	0.98245
1180.3		0.92453	0.88147	0.95318	0.95695
1181.7		0.90985	0.88183	0.95629	0.99253
1183.2		0.91777	0.8772	0.9512	0.98305
1184.7		0.91696	0.88994	0.93017	0.95254
1186.1		0.92767	0.88289	0.95449	0.97025
1187.6		0.94247	0.88957	0.93788	0.97276
1189.1		0.92511	0.87616	0.95727	0.97449
1190.6		0.93932	0.88329	0.96707	0.96816
1192		0.92578	0.87851	0.97544	0.99568
1193.5		0.92634	0.88579	0.95776	1.001
1195		0.92552	0.90511	0.94949	0.98789
1196.5		0.93368	0.89426	0.95496	0.97052
1197.9		0.92745	0.8907	0.9922	0.95354
1199.4		0.9263	0.8914	0.97003	0.98895
1200.9		0.92358	0.86885	0.97071	0.96889
1202.4		0.91433	0.89744	0.9672	0.99367
1203.8		0.92866	0.88488	0.96514	1.0033
1205.3		0.93205	0.87866	0.95827	0.97421
1206.8		0.89601	0.89962	0.93229	1.0039
1208.2		0.92445	0.89446	0.95645	0.97972
1209.7		0.93157	0.88741	0.9342	0.99257
1211.2		0.92203	0.86887	0.95207	0.98835
1212.7		0.93247	0.8898	0.97136	0.97464
1214.1		0.9401	0.8971	0.96998	0.99528
1215.6		0.93124	0.88505	0.94356	0.99546
1217.1		0.9485	0.88391	0.96318	0.96528
1218.6		0.93021	0.88298	0.96259	0.97389
1220		0.91501	0.86038	0.91931	0.97943
1221.5		0.92346	0.90201	0.95294	0.95922
1223		0.92701	0.89007	0.96716	0.98089
1224.5		0.921	0.86762	0.96874	0.97553
1225.9		0.91867	0.86646	0.94293	0.99723
1227.4		0.93604	0.88454	0.95451	0.97786
1228.9		0.93006	0.88487	0.94612	0.98512
1230.4		0.93774	0.88493	0.97804	0.99511
1231.8		0.91111	0.87692	0.95434	0.98078
1233.3		0.91985	0.9059	0.97854	0.99308
1234.8		0.92243	0.89011	0.97938	0.99588
1236.2		0.91436	0.90051	0.94739	0.97339
1237.7		0.91951	0.86004	0.93185	0.97814
1239.2		0.91367	0.8979	0.96518	0.98217
1240.7		0.93815	0.87529	0.96231	0.99325
1242.1		0.94558	0.90058	0.96213	0.98677
1243.6		0.92171	0.89135	0.95224	0.98563
1245.1		0.93676	0.88192	0.93929	0.96883
1246.6		0.92588	0.88595	0.95759	0.95612
1248		0.92121	0.88412	0.95358	0.98347
1249.5		0.93875	0.88351	0.95917	0.98702
1251		0.92513	0.89542	0.96024	1.0084
1252.5		0.93763	0.88219	0.96199	0.96434
1253.9		0.91915	0.87659	0.96732	0.98963
1255.4		0.91415	0.88558	0.94586	0.99269
1256.9		0.94362	0.85374	0.95573	0.9741
1258.3		0.91689	0.87657	0.97295	0.97116
1259.8		0.91519	0.88767	0.96043	0.99075
1261.3		0.92891	0.89176	0.96483	0.97501
1262.8		0.91892	0.87	0.97133	0.98608
1264.2		0.9229	0.89459	0.98847	0.99728
1265.7		0.9211	0.88214	0.92617	1.0063
1267.2		0.94363	0.88408	0.96118	0.96205
1268.7		0.92555	0.89981	0.96386	1.0182
1270.1		0.93182	0.88846	0.95527	0.97654
1271.6		0.93843	0.91112	0.95686	0.98759
1273.1		0.94736	0.86587	0.95904	0.95733
1274.6		0.9194	0.86705	0.95594	0.97964
1276		0.95199	0.90574	0.97716	1.0009
1277.5		0.94104	0.87746	0.96181	0.98519
1279		0.92877	0.87192	0.96605	1.0171
1280.4		0.93452	0.87638	0.99656	0.98889
1281.9		0.92987	0.8876	0.96218	1.0042
1283.4		0.94276	0.88399	0.94582	0.97565
1284.9		0.94394	0.89652	0.94905	0.98463
1286.3		0.92518	0.89839	0.95435	1.0002
1287.8		0.92384	0.89535	0.97253	0.9954
1289.3		0.91932	0.89091	0.95362	0.98686
1290.8		0.93575	0.86775	0.97744	0.96647
1292.2		0.91623	0.88177	0.94002	1.0056
1293.7		0.9331	0.8848	0.966	0.98992
1295.2		0.91778	0.89408	0.95355	1.0001
1296.7		0.94329	0.90778	0.96805	0.97247
1298.1		0.93359	0.8848	0.99213	0.99178
1299.6		0.93723	0.8779	0.9605	0.97186
1301.1		0.94775	0.88612	0.96345	0.99611
1302.6		0.94439	0.87889	0.97215	1.0146
1304		0.91269	0.88605	0.94437	0.96489
1305.5		0.93557	0.90528	0.91582	0.99343
1307		0.92177	0.86775	0.95021	0.99828
1308.4		0.93162	0.90194	0.94981	0.99097
1309.9		0.94412	0.8915	0.9529	0.97703
1311.4		0.95659	0.86655	0.9529	0.99231
1312.9		0.93411	0.88402	0.95246	0.98558
1314.3		0.94287	0.86794	0.97325	0.99825
1315.8		0.92012	0.88446	0.97948	0.97372
1317.3		0.94293	0.89462	0.93913	0.99986
1318.8		0.92865	0.88197	0.96367	1.0037
1320.2		0.92589	0.899	0.97702	1.0124
1321.7		0.94959	0.87762	0.95832	0.99252
1323.2		0.92198	0.88312	0.96013	1.0011
1324.7		0.92617	0.8791	0.97258	0.9859
1326.1		0.91444	0.89787	0.95518	0.96813
1327.6		0.93024	0.87732	0.96005	0.97763
1329.1		0.93117	0.89412	0.96258	0.99084
1330.5		0.92157	0.87385	0.99144	0.98218
1332		0.91652	0.8865	0.95935	0.98255
1333.5		0.91761	0.87995	0.96164	0.98357
1335		0.92411	0.88754	0.9712	0.96179
1336.4		0.92971	0.87331	0.99091	0.98842
1337.9		0.91909	0.8938	0.95456	1.0066
1339.4		0.92944	0.88758	0.95653	0.97334
1340.9		0.93316	0.89818	0.96346	0.98676
1342.3		0.934	0.88853	0.96136	1.0023
1343.8		0.92992	0.88667	0.9404	0.97109
1345.3		0.95473	0.87395	0.97581	0.96168
1346.8		0.94526	0.88271	0.96464	0.96431
1348.2		0.93497	0.87836	0.93787	0.96335
1349.7		0.94966	0.883	0.96747	0.98777
1351.2		0.92697	0.87705	0.96021	1.0053
1352.6		0.9407	0.89116	0.96464	1.0048
1354.1		0.94317	0.88589	0.98479	0.99968
1355.6		0.9368	0.87192	0.96836	0.97947
1357.1		0.92418	0.87919	0.98016	0.98082
1358.5		0.93877	0.88601	0.9677	0.96582
1360		0.94666	0.90251	0.95816	0.99018
1361.5		0.93655	0.87092	0.98269	0.99837
1363		0.93018	0.8765	0.99057	0.99263
1364.4		0.94406	0.87524	0.95209	0.98822
1365.9		0.94238	0.8723	0.94574	1.0076
1367.4		0.93396	0.87647	0.95549	0.98645
1368.9		0.92806	0.8952	0.96589	0.97122
1370.3		0.93376	0.87945	0.96155	0.97081
1371.8		0.93779	0.86899	0.93199	0.96904
1373.3		0.93557	0.88803	0.96601	0.97388
1374.8		0.94044	0.88468	0.9808	1.0126
1376.2		0.93389	0.88277	0.9609	0.97469
1377.7		0.94865	0.87254	0.96498	0.98695
1379.2		0.92954	0.86422	0.96318	0.98702

## Sheet: 3B
PBS	Cytoplasm	Nucleus	Hela Cell extract		Individual Dconfocal (um2s-1)	Fluorescein
62.319	31.026	29.137	47.263
54.114	38.228	35.238	56.094
56.311	44.77	44.724	54.685
91.195	58.335	39.103	46.621
64.811	15.388	65.682	60.343
50.378	40.632	27.166	38.022
56.151	31.93	37.222	61.075
78.849	37.19	44.607	65.61
57.257	46.175	46.132	48.599
47.35	37.416	39.184	47.263
59.435	25.876	39.627	61.498
50.564	51.731	47.631	35.263
57.504	43.586	45.374	51.37
59.46	37.402	24.363	33.118
53.527	74.208	29.955	36.674
66.379	41.174	47.08	55.018
44.362	35.532	41.169	43.789
45.114	22.09	38.6	52.171
59.006	39.918	41.349	49.976
53.735	20.977	55.999	54.68
57.05	40.608	55.888	50.189
59.215	34.868	27.308	54.641
46.414	63.663	41.389	50.083
44.679	35.981	62.21	69.744
56.076	36.472	62.405	44.187
62.07	29.71	50.997	78.608
53.67	25.15	38.517	65.046
58.092	39.547	34.88	55.645
67.466	31.548	50.18	88.335
72.778	41.729	56.107	48.15
65.429	28.878	37.965
54.191	35.58	41.433
	16.443	42.549
	27.627	33.532
	36.076	43.479
	50.013

## Sheet: 3C
	Combined Dconfocal (um2s-1)	Standard Error	Percentage error		Fluorescein
PBS	56.5	2.42054	4.28413
Cytoplasm	38.5	1.97822	5.14095
Nucleus	43.2	2.16944	5.02309
Hela Cell extract	49.6	1.85746	3.7485

## Sheet: 3E
Time axis (re-adjusted)	Pre-Bleach	PBS	Cytoplasm	Nucleus		CCF2
-13.261	1
-11.788	1.0046
10.314	0.98468
-8.8408	1
-7.3674	0.93863
-5.8939	1.0397
-4.4204	0.9716
-2.9469	0.99957
-1.4735	0.95323
0		0.065302	0.19492	0.25909
1.4735		0.1036	0.2183	0.26886
2.9469		0.10781	0.22784	0.28253
4.4204		0.14089	0.2344	0.30805
5.8939		0.14414	0.24429	0.29979
7.3674		0.19009	0.26338	0.321
8.8408		0.17884	0.27374	0.31964
10.314		0.22365	0.28172	0.33244
11.788		0.25095	0.28528	0.3381
13.261		0.25388	0.28911	0.33727
14.735		0.24805	0.29313	0.34532
16.208		0.27835	0.31557	0.35353
17.682		0.30125	0.2973	0.35387
19.155		0.2641	0.32525	0.36625
20.629		0.30525	0.31469	0.36488
22.102		0.37586	0.32311	0.38364
23.576		0.31827	0.32489	0.3873
25.049		0.37	0.31465	0.37938
26.523		0.32699	0.33163	0.39636
27.996		0.3631	0.34143	0.38745
29.469		0.39051	0.34657	0.38621
30.943		0.37715	0.3508	0.39801
32.416		0.38638	0.36693	0.38115
33.89		0.3828	0.3576	0.40441
35.363		0.37296	0.34613	0.42078
36.837		0.41425	0.36733	0.41447
38.31		0.38209	0.37132	0.41701
39.784		0.44274	0.38201	0.40245
41.257		0.42317	0.37271	0.42253
42.731		0.44251	0.38187	0.40519
44.204		0.44386	0.37424	0.39981
45.678		0.45221	0.36418	0.40666
47.151		0.45144	0.3919	0.42522
48.625		0.40616	0.38109	0.43324
50.098		0.43628	0.38843	0.44759
51.572		0.44943	0.38373	0.39691
53.045		0.45292	0.39979	0.43064
54.519		0.50604	0.38954	0.42093
55.992		0.49598	0.38381	0.43686
57.465		0.51175	0.3892	0.45371
58.939		0.49731	0.39121	0.41443
60.412		0.47315	0.4021	0.44036
61.886		0.51256	0.38857	0.45983
63.359		0.4928	0.39866	0.44679
64.833		0.49317	0.40547	0.45709
66.306		0.55002	0.42081	0.42343
67.78		0.53689	0.41146	0.43175
69.253		0.54461	0.40414	0.44749
70.727		0.56002	0.40866	0.45576
72.2		0.55882	0.40251	0.42489
73.674		0.5472	0.42834	0.4503
75.147		0.53084	0.41232	0.45611
76.621		0.56028	0.3989	0.45103
78.094		0.56504	0.40291	0.46725
79.568		0.59027	0.42215	0.45756
81.041		0.53217	0.43612	0.44969
82.515		0.55074	0.43698	0.44056
83.988		0.54934	0.41765	0.44135
85.461		0.56121	0.43814	0.46647
86.935		0.54296	0.42932	0.45855
88.408		0.54836	0.42513	0.4699
89.882		0.55293	0.45185	0.45491
91.355		0.54285	0.43243	0.45819
92.829		0.53741	0.44278	0.46851
94.302		0.51532	0.43472	0.44185
95.776		0.56747	0.43703	0.44037
97.249		0.61668	0.44506	0.45818
98.723		0.57266	0.44712	0.46047
100.2		0.61155	0.43537	0.45239
101.67		0.59844	0.4452	0.43783
103.14		0.57148	0.44308	0.47821
104.62		0.62145	0.44403	0.45587
106.09		0.60017	0.44845	0.46144
107.56		0.60063	0.45475	0.4579
109.04		0.62056	0.44459	0.47969
110.51		0.58769	0.44067	0.48097
111.98		0.59946	0.44695	0.45647
113.46		0.61181	0.43386	0.46407
114.93		0.65549	0.44975	0.46789
116.4		0.58801	0.4557	0.47549
117.88		0.6252	0.45187	0.46883
119.35		0.6344	0.46083	0.46595
120.82		0.65349	0.47033	0.47908
122.3		0.5535	0.45517	0.49396
123.77		0.61102	0.45018	0.44268
125.25		0.58079	0.4683	0.46291
126.72		0.65249	0.45446	0.46615
128.19		0.60741	0.45192	0.47512
129.67		0.64248	0.47919	0.48411
131.14		0.58104	0.48096	0.49695
132.61		0.63389	0.46904	0.48111
134.09		0.6043	0.45636	0.48827
135.56		0.64519	0.45303	0.47047
137.03		0.60486	0.47142	0.46842
138.51		0.61122	0.47526	0.48883
139.98		0.63109	0.46736	0.47946
141.45		0.67319	0.47587	0.48878
142.93		0.63948	0.48924	0.4745
144.4		0.6544	0.4714	0.49508
145.87		0.63104	0.46575	0.48176
147.35		0.64634	0.47853	0.4929
148.82		0.63193	0.47181	0.48228
150.29		0.66443	0.48494	0.48038
151.77		0.65823	0.46072	0.49004
153.24		0.63358	0.48741	0.48398
154.71		0.64205	0.47532	0.48815
156.19		0.68107	0.46722	0.48167
157.66		0.65281	0.48701	0.48013
159.14		0.65871	0.48476	0.49262
160.61		0.64268	0.47874	0.49292
162.08		0.67421	0.47726	0.51483
163.56		0.66763	0.49521	0.48863
165.03		0.63885	0.48201	0.47395
166.5		0.66181	0.4925	0.47394
167.98		0.68317	0.48604	0.49551
169.45		0.67891	0.52251	0.49987
170.92		0.66231	0.48407	0.49713
172.4		0.76497	0.50123	0.49547
173.87		0.69691	0.48813	0.50367
175.34		0.67474	0.49736	0.48642
176.82		0.66534	0.49959	0.50628
178.29		0.66895	0.49271	0.50389
179.76		0.65299	0.49979	0.50884
181.24		0.66994	0.48991	0.49536
182.71		0.66676	0.50498	0.50424
184.18		0.68365	0.47995	0.51906
185.66		0.66679	0.50693	0.51771
187.13		0.68388	0.49111	0.51124
188.6		0.68713	0.48976	0.50732
190.08		0.68416	0.48683	0.52148
191.55		0.66457	0.5009	0.48947
193.03		0.69809	0.49516	0.52867
194.5		0.71845	0.50144	0.52405
195.97		0.6855	0.50279	0.49704
197.45		0.65286	0.49032	0.48064
198.92		0.69486	0.50315	0.48465
200.39		0.67543	0.51443	0.52376
201.87		0.6866	0.50059	0.49577
203.34		0.66791	0.5296	0.48594
204.81		0.70206	0.52053	0.49564
206.29		0.68455	0.48677	0.51401
207.76		0.69086	0.50636	0.49769
209.23		0.67665	0.51217	0.50367
210.71		0.70969	0.50379	0.51953
212.18		0.68434	0.5169	0.5206
213.65		0.69479	0.51084	0.51587
215.13		0.69489	0.50358	0.49354
216.6		0.74392	0.51021	0.51384
218.07		0.71504	0.51404	0.50749
219.55		0.70329	0.51824	0.51544
221.02		0.74119	0.50812	0.49283
222.49		0.74413	0.52493	0.50112
223.97		0.69183	0.51742	0.48952
225.44		0.68269	0.52635	0.51645
226.91		0.67895	0.49932	0.49426
228.39		0.68442	0.52486	0.50371
229.86		0.69314	0.51403	0.51984
231.34		0.6948	0.53014	0.51152
232.81		0.69717	0.52717	0.53131
234.28		0.72232	0.51953	0.51717
235.76		0.72906	0.52725	0.51016
237.23		0.70317	0.55206	0.51078
238.7		0.70055	0.52463	0.50337
240.18		0.68445	0.52051	0.53623
241.65		0.69345	0.52224	0.49492
243.12		0.719	0.53811	0.50753
244.6		0.71587	0.49831	0.5082
246.07		0.72583	0.54865	0.49928
247.54		0.6871	0.52388	0.5128
249.02		0.72809	0.5307	0.5206
250.49		0.72104	0.53707	0.51286
251.96		0.73607	0.53944	0.52526
253.44		0.72715	0.53198	0.5347
254.91		0.70317	0.5285	0.52465
256.38		0.73139	0.52073	0.53028
257.86		0.72609	0.53785	0.51474
259.33		0.75524	0.53232	0.51941
260.8		0.7544	0.53201	0.53752
262.28		0.69171	0.53618	0.50445
263.75		0.72821	0.53159	0.51224
265.23		0.67034	0.55891	0.52058
266.7		0.79356	0.53109	0.54529
268.17		0.727	0.53952	0.54288
269.65		0.71495	0.52849	0.50999
271.12		0.75916	0.53703	0.50851
272.59		0.70242	0.5408	0.54517
274.07		0.71921	0.5427	0.53802
275.54		0.73064	0.54292	0.51738
277.01		0.73071	0.53208	0.51677
278.49		0.7469	0.53586	0.53324
279.96		0.72492	0.55518	0.55133
281.43		0.71736	0.55145	0.53572
282.91		0.71516	0.52663	0.53946
284.38		0.72379	0.54483	0.50926
285.85		0.73352	0.53018	0.5353
287.33		0.75085	0.54261	0.53205
288.8		0.73726	0.53917	0.54294
290.27		0.72758	0.55624	0.53563
291.75		0.75651	0.53721	0.54039
293.22		0.70773	0.55975	0.53828
294.69		0.78181	0.55448	0.52796
296.17		0.72548	0.55209	0.51147
297.64		0.75904	0.56082	0.52111
299.12		0.64127	0.53078	0.54266
300.59		0.76503	0.52656	0.52778
302.06		0.78402	0.55317	0.54967
303.54		0.72319	0.54863	0.52945
305.01		0.76146	0.54121	0.52103
306.48		0.7648	0.54424	0.52592
307.96		0.71714	0.55801	0.53886
309.43		0.71761	0.55753	0.53032
310.9		0.79165	0.52678	0.54731
312.38		0.71298	0.56878	0.53588
313.85		0.73024	0.56884	0.52223
315.32		0.73337	0.55936	0.52563
316.8		0.7884	0.54271	0.52056
318.27		0.75319	0.55238	0.5486
319.74		0.77916	0.56706	0.52589
321.22		0.73363	0.57362	0.53779
322.69		0.77012	0.55292	0.5391
324.16		0.77647	0.55903	0.53827
325.64		0.72577	0.52983	0.52267
327.11		0.77	0.55992	0.52985
328.58		0.74327	0.55911	0.55252
330.06		0.74747	0.53789	0.52595
331.53		0.79415	0.5692	0.54743
333.01		0.77844	0.57177	0.55851
334.48		0.74768	0.55334	0.54438
335.95		0.73946	0.56834	0.54719
337.43		0.77759	0.56115	0.54188
338.9		0.78497	0.53439	0.56734
340.37		0.73932	0.5648	0.54237
341.85		0.75154	0.58579	0.52807
343.32		0.76886	0.56019	0.5556
344.79		0.73226	0.55814	0.53369
346.27		0.74348	0.59021	0.55458
347.74		0.7788	0.56267	0.5429
349.21		0.74233	0.55789	0.51873
350.69		0.7263	0.56319	0.54943
352.16		0.72875	0.56294	0.54793
353.63		0.74414	0.56907	0.55227
355.11		0.73796	0.56415	0.52778
356.58		0.77004	0.55122	0.53543
358.05		0.78741	0.57569	0.53551
359.53		0.75887	0.56297	0.55905
361		0.82319	0.57221	0.54793
362.47		0.7224	0.56175	0.54035
363.95		0.78635	0.58605	0.55443
365.42		0.76207	0.56349	0.5475
366.89		0.75576	0.5959	0.5552
368.37		0.73556	0.55955	0.53098
369.84		0.79923	0.58469	0.5381
371.32		0.76846	0.56737	0.52941
372.79		0.71472	0.59178	0.55926
374.26		0.80629	0.56525	0.56196
375.74		0.76513	0.56895	0.52017
377.21		0.76126	0.56025	0.54189
378.68		0.80652	0.57178	0.57478
380.16		0.78761	0.57546	0.55656
381.63		0.74342	0.58344	0.53255
383.1		0.7515	0.57347	0.55194
384.58		0.78644	0.59027	0.53026
386.05		0.72682	0.57557	0.5529
387.52		0.7458	0.57428	0.55857
389		0.76963	0.56449	0.55194
390.47		0.75841	0.57094	0.55102
391.94		0.8277	0.58668	0.56898
393.42		0.74507	0.58136	0.5807
394.89		0.7477	0.58863	0.55928
396.36		0.79781	0.56234	0.55611
397.84		0.82175	0.58011	0.52125
399.31		0.8181	0.59807	0.5818
400.78		0.75464	0.58156	0.56695
402.26		0.79354	0.57937	0.57301
403.73		0.7225	0.58491	0.5621
405.21		0.75602	0.5646	0.55432
406.68		0.71785	0.58351	0.55108
408.15		0.78594	0.55795	0.55066
409.63		0.79663	0.5848	0.58673
411.1		0.80488	0.58705	0.55945
412.57		0.75323	0.56436	0.56142
414.05		0.79522	0.57784	0.55873
415.52		0.76789	0.57899	0.53945
416.99		0.74163	0.58386	0.54425
418.47		0.77207	0.58017	0.57719
419.94		0.79967	0.58092	0.54586
421.41		0.80413	0.59323	0.56766
422.89		0.8171	0.57846	0.56229
424.36		0.76129	0.57443	0.55322
425.83		0.79768	0.58239	0.57704
427.31		0.7916	0.59651	0.55019
428.78		0.72231	0.60041	0.57768
430.25		0.80686	0.59101	0.58622
431.73		0.73574	0.57676	0.54541
433.2		0.80498	0.5959	0.53755
434.67		0.7738	0.58655	0.57905
436.15		0.83035	0.58706	0.57022
437.62		0.80646	0.58634	0.56692
439.1		0.79354	0.59002	0.5628
440.57		0.75936	0.59048	0.56875
442.04		0.80799	0.60252	0.53832
443.52		0.75981	0.60343	0.54604
444.99		0.77483	0.60022	0.56181
446.46		0.80736	0.60385	0.57878
447.94		0.79558	0.61334	0.57867
449.41		0.80877	0.58267	0.56038
450.88		0.77907	0.61503	0.56033
452.36		0.72297	0.58714	0.53381
453.83		0.81891	0.59391	0.59377
455.3		0.77589	0.59106	0.5614
456.78		0.80488	0.61137	0.54816
458.25		0.85006	0.6068	0.55566
459.72		0.78754	0.59554	0.57351
461.2		0.76723	0.61421	0.56584
462.67		0.78501	0.61169	0.58818
464.14		0.76324	0.58811	0.5545
465.62		0.80627	0.61336	0.57518
467.09		0.79466	0.59784	0.57853
468.56		0.78929	0.59605	0.57162
470.04		0.81782	0.60926	0.55749
471.51		0.80079	0.60297	0.5705
472.98		0.77848	0.61165	0.5839
474.46		0.79382	0.60764	0.58377
475.93		0.84817	0.61309	0.59807
477.41		0.80003	0.6355	0.57712
478.88		0.82892	0.60955	0.57261
480.35		0.7731	0.59508	0.58066
481.83		0.78178	0.61115	0.58005
483.3		0.82009	0.5877	0.55129
484.77		0.85267	0.60513	0.57123
486.25		0.83182	0.61884	0.56536
487.72		0.79958	0.59503	0.57139
489.19		0.80644	0.61063	0.59279
490.67		0.81962	0.60978	0.59779
492.14		0.76395	0.60415	0.58515
493.61		0.84841	0.61521	0.5821
495.09		0.8223	0.59947	0.54652
496.56		0.80016	0.59921	0.57089
498.03		0.81135	0.57734	0.57835
499.51		0.80509	0.60429	0.56556
500.98		0.77386	0.62003	0.59009
502.45		0.77796	0.60913	0.57986
503.93		0.78407	0.59255	0.55584
505.4		0.80778	0.59438	0.57695
506.87		0.83671	0.60462	0.58174
508.35		0.8612	0.61929	0.56946
509.82		0.82322	0.63058	0.56553
511.3		0.82033	0.61332	0.57375
512.77		0.77882	0.62671	0.58239
514.24		0.83717	0.60117	0.59506
515.72		0.84211	0.59167	0.58142
517.19		0.83135	0.60019	0.56675
518.66		0.77504	0.61407	0.58435
520.14		0.86805	0.60511	0.57528
521.61		0.87438	0.61338	0.58478
523.08		0.78515	0.60612	0.5823
524.56		0.82817	0.60022	0.5825
526.03		0.82251	0.61589	0.59922
527.5		0.80995	0.60223	0.59404
528.98		0.84796	0.60565	0.58792
530.45		0.76995	0.6176	0.58955
531.92		0.75941	0.60818	0.59191
533.4		0.79925	0.59749	0.58875
534.87		0.76924	0.60388	0.56895
536.34		0.79598	0.62217	0.58546
537.82		0.78672	0.61892	0.60523
539.29		0.78855	0.62989	0.58998
540.76		0.78478	0.61712	0.57391
542.24		0.788	0.62342	0.58088
543.71		0.77343	0.60373	0.59926
545.19		0.74092	0.61577	0.57697
546.66		0.77089	0.62041	0.59436
548.13		0.76198	0.60226	0.58378
549.61		0.7979	0.62235	0.58729
551.08		0.80306	0.63246	0.59509
552.55		0.78082	0.60261	0.60351
554.03		0.79455	0.62182	0.57732
555.5		0.85726	0.63566	0.6176
556.97		0.81387	0.61645	0.57588
558.45		0.82062	0.61668	0.58143
559.92		0.83129	0.62574	0.60259
561.39		0.81549	0.63552	0.59337
562.87		0.86064	0.62301	0.58121
564.34		0.80057	0.61869	0.59586
565.81		0.81678	0.62638	0.58166
567.29		0.83691	0.62442	0.58963
568.76		0.8308	0.63367	0.57947
570.23		0.83822	0.60891	0.60602
571.71		0.82429	0.65772	0.57616
573.18		0.82261	0.63828	0.58716
574.65		0.8152	0.63862	0.59189
576.13		0.82412	0.63711	0.57303
577.6		0.83268	0.63568	0.60148
579.08		0.82843	0.61664	0.59565
580.55		0.83366	0.62326	0.58656
582.02		0.77058	0.6319	0.58888
583.5		0.80358	0.6345	0.58923
584.97		0.84926	0.64376	0.59704
586.44		0.81404	0.62212	0.59706
587.92		0.85862	0.62094	0.59336
589.39		0.82167	0.65147	0.61147
590.86		0.82575	0.61855	0.59041
592.34		0.80166	0.63128	0.58917
593.81		0.84167	0.61972	0.60627
595.28		0.78564	0.64128	0.588
596.76		0.79899	0.63092	0.56536
598.23		0.81772	0.62983	0.60279
599.7		0.78198	0.62035	0.60431
601.18		0.79916	0.63986	0.60202
602.65		0.85896	0.64219	0.60517
604.12		0.81976	0.62339	0.59939
605.6		0.80134	0.63027	0.60005
607.07		0.83068	0.64062	0.60507
608.54		0.77446	0.63969	0.58748
610.02		0.82096	0.62972	0.60654
611.49		0.86789	0.6379	0.59139
612.96		0.78506	0.61427	0.60295
614.44		0.78596	0.64246	0.58779
615.91		0.80106	0.62183	0.61977
617.39		0.82589	0.62928	0.6059
618.86		0.8441	0.64408	0.59753
620.33		0.8577	0.65508	0.58924
621.81		0.83168	0.64408	0.59988
623.28		0.79069	0.63692	0.57213
624.75		0.84044	0.63984	0.60859
626.23		0.83891	0.63665	0.58571
627.7		0.86383	0.61498	0.58457
629.17		0.90747	0.64602	0.60275
630.65		0.81561	0.63909	0.6053
632.12		0.78721	0.63559	0.60217
633.59		0.81722	0.62903	0.60579
635.07		0.8282	0.6298	0.60458
636.54		0.81333	0.6237	0.59451
638.01		0.87321	0.65633	0.59664
639.49		0.84049	0.61904	0.61083
640.96		0.80751	0.63556	0.59818
642.43		0.81183	0.65183	0.60726
643.91		0.8274	0.67162	0.58208
645.38		0.82666	0.63934	0.58053
646.85		0.88247	0.64279	0.62463
648.33		0.86405	0.6188	0.60199
649.8		0.80409	0.63597	0.61178
651.28		0.83873	0.64525	0.59907
652.75		0.81767	0.64524	0.60213
654.22		0.80511	0.6521	0.59079
655.7		0.81798	0.63767	0.62232
657.17		0.81711	0.63128	0.60096
658.64		0.89226	0.65024	0.61369
660.12		0.83303	0.63329	0.60659
661.59		0.87444	0.62989	0.60246
663.06		0.79418	0.63634	0.59446
664.54		0.79798	0.63892	0.61138
666.01		0.84898	0.6668	0.59623
667.48		0.87528	0.63386	0.59789
668.96		0.83523	0.64715	0.61186
670.43		0.83778	0.65506	0.60957
671.9		0.87085	0.64803	0.61894
673.38		0.82111	0.64783	0.60626
674.85		0.88241	0.63194	0.62226
676.32		0.8596	0.64374	0.60346
677.8		0.82997	0.66373	0.62564
679.27		0.84791	0.63035	0.62386
680.74		0.8327	0.63326	0.59143
682.22		0.82733	0.65108	0.6049
683.69		0.83364	0.66434	0.59066
685.17		0.81493	0.63514	0.60075
686.64		0.86106	0.6433	0.60853
688.11		0.84816	0.66373	0.59558
689.59		0.80615	0.64302	0.6052
691.06		0.83759	0.65132	0.62151
692.53		0.86576	0.62947	0.62429
694.01		0.86712	0.64045	0.60782
695.48		0.8563	0.66832	0.60385
696.95		0.80811	0.65293	0.59194
698.43		0.84001	0.66267	0.57452
699.9		0.81066	0.65691	0.64627
701.37		0.83517	0.66299	0.60814
702.85		0.90478	0.64164	0.62157
704.32		0.83913	0.65241	0.61685
705.79		0.82533	0.65632	0.6077
707.27		0.86062	0.61342	0.58778
708.74		0.84008	0.66678	0.60212
710.21		0.82767	0.65088	0.60829
711.69		0.83058	0.64176	0.6288
713.16		0.8523	0.67183	0.61699
714.63		0.83206	0.62003	0.61366
716.11		0.87765	0.64926	0.57755
717.58		0.86928	0.64624	0.61468
719.06		0.82798	0.64858	0.6376
720.53		0.77407	0.64027	0.60851
722		0.8502	0.66703	0.61984
723.48		0.84517	0.63297	0.60261
724.95		0.82873	0.6591	0.63705
726.42		0.8571	0.66092	0.61569
727.9		0.89669	0.66922	0.6148
729.37		0.84212	0.65724	0.62573
730.84		0.86577	0.66107	0.5911
732.32		0.86517	0.65944	0.60409
733.79		0.82747	0.67428	0.62906
735.26		0.88229	0.67082	0.61466
736.74		0.83673	0.65273	0.61334
738.21		0.86418	0.63287	0.61394
739.68		0.84064	0.64251	0.59218
741.16		0.82843	0.65376	0.61426
742.63		0.83719	0.65846	0.63749
744.1		0.83347	0.64829	0.61885
745.58		0.88778	0.6482	0.6301
747.05		0.82786	0.64484	0.63181
748.52		0.87213	0.66686	0.61684
750		0.85686	0.64974	0.60712
751.47		0.85784	0.65999	0.62622
752.94		0.86535	0.64339	0.59907
754.42		0.82962	0.64265	0.60953
755.89		0.86007	0.65521	0.5968
757.37		0.86259	0.65666	0.6184
758.84		0.88249	0.65188	0.61164
760.31		0.83975	0.65381	0.63207
761.79		0.82485	0.65319	0.61951
763.26		0.8348	0.68335	0.62496
764.73		0.7768	0.65276	0.60263
766.21		0.85135	0.657	0.61127
767.68		0.82274	0.65938	0.63718
769.15		0.82322	0.65324	0.61636
770.63		0.82316	0.66266	0.64516
772.1		0.87846	0.65814	0.63263
773.57		0.8124	0.66472	0.61865
775.05		0.81141	0.67242	0.62736
776.52		0.8345	0.65229	0.61748
777.99		0.80172	0.65568	0.61747
779.47		0.87595	0.66271	0.63368
780.94		0.83976	0.65742	0.61284
782.41		0.90676	0.65799	0.63841
783.89		0.86858	0.66173	0.61763
785.36		0.85464	0.65612	0.63959
786.83		0.84737	0.66524	0.6223
788.31		0.88028	0.6548	0.59603
789.78		0.8128	0.65701	0.61084
791.26		0.8696	0.67381	0.6212
792.73		0.87875	0.6512	0.62488
794.2		0.91257	0.68148	0.62571
795.68		0.8208	0.65782	0.61442
797.15		0.80362	0.66029	0.61833
798.62		0.83908	0.68709	0.61893
800.1		0.82888	0.67876	0.62316
801.57		0.85969	0.66492	0.63164
803.04		0.85256	0.66927	0.61594
804.52		0.85166	0.66144	0.60043
805.99		0.88563	0.68219	0.62396
807.46		0.85744	0.66522	0.66095
808.94		0.81847	0.65552	0.6309
810.41		0.86689	0.6738	0.63388
811.88		0.84302	0.67316	0.65474
813.36		0.86599	0.66384	0.60818
814.83		0.85046	0.67553	0.64962
816.3		0.88994	0.6718	0.63417
817.78		0.81278	0.65731	0.6434
819.25		0.85931	0.66628	0.6362
820.72		0.87246	0.68388	0.62939
822.2		0.82777	0.66216	0.61653
823.67		0.8652	0.65746	0.64073
825.15		0.8376	0.6501	0.62224
826.62		0.85392	0.67484	0.63636
828.09		0.82264	0.68872	0.61469
829.57		0.83867	0.67742	0.61455
831.04		0.85898	0.68575	0.65271
832.51		0.85648	0.66375	0.65364
833.99		0.86969	0.66619	0.63563
835.46		0.8357	0.68994	0.6253
836.93		0.89742	0.66614	0.63498
838.41		0.86332	0.67355	0.62403
839.88		0.85689	0.6648	0.64029
841.35		0.84608	0.6744	0.63993
842.83		0.88953	0.67792	0.63231
844.3		0.84385	0.66504	0.61092
845.77		0.81608	0.6774	0.63902
847.25		0.84274	0.66387	0.62428
848.72		0.90729	0.69065	0.62484
850.19		0.85347	0.66797	0.62563
851.67		0.83549	0.67649	0.63747
853.14		0.85669	0.67536	0.60116
854.61		0.89273	0.66158	0.62839
856.09		0.85536	0.66217	0.6497
857.56		0.89365	0.67734	0.61944
859.04		0.90585	0.66597	0.63984
860.51		0.87348	0.67215	0.62904
861.98		0.8977	0.67956	0.61383
863.46		0.83016	0.68131	0.67399
864.93		0.85312	0.67323	0.64015
866.4		0.81534	0.67511	0.64481
867.88		0.86842	0.67834	0.6328
869.35		0.92467	0.66883	0.61706
870.82		0.86773	0.68029	0.61882
872.3		0.88001	0.68899	0.63814
873.77		0.86074	0.68852	0.63681
875.24		0.88419	0.65888	0.62715
876.72		0.8408	0.66951	0.63211
878.19		0.83811	0.68169	0.65486
879.66		0.87467	0.65402	0.60649
881.14		0.88563	0.67625	0.62288
882.61		0.86134	0.67456	0.64946
884.08		0.84059	0.65404	0.64356
885.56		0.86062	0.66129	0.66628
887.03		0.80039	0.6832	0.64794
888.5		0.88562	0.68274	0.63478
889.98		0.84763	0.66243	0.65289
891.45		0.87875	0.67688	0.64953
892.92		0.83172	0.68827	0.63993
894.4		0.8846	0.6527	0.64548
895.87		0.90318	0.68274	0.65284
897.35		0.85815	0.67654	0.66184
898.82		0.921	0.65651	0.6432
900.29		0.86262	0.67693	0.64116
901.77		0.87144	0.69956	0.62474
903.24		0.85678	0.674	0.62995
904.71		0.84815	0.66421	0.65255
906.19		0.85679	0.67162	0.63735
907.66		0.91393	0.69282	0.6425
909.13		0.83722	0.66388	0.65142
910.61		0.89348	0.67823	0.6644
912.08		0.86757	0.68432	0.63973
913.55		0.85579	0.68642	0.62109
915.03		0.83963	0.69138	0.64589
916.5		0.90181	0.70321	0.61777
917.97		0.83825	0.67599	0.66512
919.45		0.87803	0.68613	0.63148
920.92		0.85538	0.68296	0.6399
922.39		0.8993	0.6706	0.65591
923.87		0.90368	0.6783	0.62256
925.34		0.85755	0.67698	0.63555
926.81		0.86839	0.6789	0.617
928.29		0.88328	0.67053	0.64946
929.76		0.88862	0.67886	0.63506
931.24		0.94294	0.70067	0.64012
932.71		0.82788	0.67157	0.64722
934.18		0.89241	0.66883	0.62886
935.66		0.84067	0.68484	0.64023
937.13		0.85618	0.68066	0.6578
938.6		0.89839	0.67948	0.63723
940.08		0.86844	0.66813	0.64652
941.55		0.83891	0.67918	0.60553
943.02		0.89903	0.67631	0.63136
944.5		0.91203	0.66687	0.6464
945.97		0.87296	0.68785	0.65543
947.44		0.8539	0.70727	0.65204
948.92		0.87033	0.69879	0.65976
950.39		0.82824	0.69023	0.6518
951.86		0.95147	0.68893	0.64044
953.34		0.9196	0.66985	0.64584
954.81		0.84401	0.70439	0.6309
956.28		0.81547	0.68539	0.61724
957.76		0.86198	0.68551	0.63097
959.23		0.87782	0.70006	0.64441
960.7		0.8529	0.68797	0.66675
962.18		0.84087	0.68457	0.64406
963.65		0.8761	0.67284	0.64884
965.13		0.88834	0.67154	0.64493
966.6		0.86276	0.68645	0.63669
968.07		0.88186	0.68257	0.62881
969.55		0.80876	0.67889	0.65891
971.02		0.90998	0.68983	0.65026
972.49		0.86634	0.70167	0.63648
973.97		0.86491	0.67925	0.66749
975.44		0.86558	0.67945	0.65514
976.91		0.83652	0.67557	0.63257
978.39		0.89442	0.69173	0.63621
979.86		0.90266	0.70558	0.68626
981.33		0.82899	0.67822	0.63843
982.81		0.79927	0.68969	0.66001
984.28		0.90395	0.68276	0.65306
985.75		0.89053	0.66695	0.66654
987.23		0.89501	0.67583	0.63221
988.7		0.86802	0.69079	0.63306
990.17		0.88923	0.67574	0.65675
991.65		0.86171	0.68559	0.64614
993.12		0.88738	0.70222	0.64625
994.59		0.854	0.70161	0.6797
996.07		0.85916	0.69213	0.64032
997.54		0.90813	0.68554	0.65241
999.02		0.83627	0.70575	0.65875
1000.5		0.9098	0.69113	0.67209
1002		0.90725	0.66648	0.62526
1003.4		0.83966	0.70576	0.66231
1004.9		0.88811	0.71017	0.63812
1006.4		0.87499	0.68247	0.64391
1007.9		0.89215	0.6909	0.66534
1009.3		0.85664	0.67938	0.63613
1010.8		0.87365	0.6927	0.64833
1012.3		0.88333	0.69805	0.64979
1013.7		0.85806	0.67831	0.66579
1015.2		0.8721	0.68415	0.63878
1016.7		0.90312	0.67715	0.67202
1018.2		0.90261	0.70038	0.65922
1019.6		0.84777	0.67444	0.65225
1021.1		0.8569	0.70394	0.65394
1022.6		0.87426	0.69659	0.6459
1024.1		0.86638	0.69411	0.64658
1025.5		0.86498	0.69011	0.67276
1027		0.86383	0.65906	0.64345
1028.5		0.87051	0.68408	0.64795
1030		0.95236	0.68257	0.6542
1031.4		0.7918	0.6995	0.65899
1032.9		0.90158	0.69052	0.65162
1034.4		0.92991	0.71163	0.65064
1035.9		0.88146	0.70408	0.66857
1037.3		0.90544	0.68157	0.66795
1038.8		0.86807	0.69394	0.65319
1040.3		0.81541	0.70722	0.6549
1041.7		0.89893	0.70106	0.68709
1043.2		0.9044	0.70511	0.64591
1044.7		0.88138	0.6832	0.62053
1046.2		0.85109	0.70446	0.63818
1047.6		0.84696	0.68513	0.66355
1049.1		0.85902	0.69046	0.65003
1050.6		0.86895	0.69192	0.65377
1052.1		0.82628	0.69143	0.64751
1053.5		0.88848	0.70303	0.65338
1055		0.88667	0.69588	0.65322
1056.5		0.86883	0.69514	0.66752
1058		0.8336	0.70674	0.64999
1059.4		0.85472	0.7051	0.65473
1060.9		0.9202	0.68864	0.6273
1062.4		0.88862	0.69425	0.6576
1063.8		0.92126	0.69644	0.64846
1065.3		0.83227	0.7254	0.66543
1066.8		0.86065	0.70533	0.68601
1068.3		0.86279	0.72481	0.64873
1069.7		0.87116	0.70465	0.66414
1071.2		0.88682	0.69406	0.67981
1072.7		0.88055	0.69566	0.64827
1074.2		0.92252	0.69582	0.68526
1075.6		0.84981	0.68923	0.65125
1077.1		0.89221	0.69434	0.65179
1078.6		0.88558	0.69218	0.6686
1080.1		0.87608	0.71212	0.64463
1081.5		0.91196	0.70565	0.66498
1083		0.94004	0.71234	0.6645
1084.5		0.80817	0.70694	0.66858
1085.9		0.85207	0.7156	0.66638
1087.4		0.90208	0.70397	0.64309
1088.9		0.85556	0.70865	0.66205
1090.4		0.88059	0.70199	0.64511
1091.8		0.85941	0.71758	0.64565
1093.3		0.89705	0.71237	0.669
1094.8		0.86617	0.70869	0.69001
1096.3		0.89313	0.71849	0.67405
1097.7		0.81699	0.69889	0.66496
1099.2		0.83632	0.71186	0.64862
1100.7		0.93888	0.70921	0.6561
1102.2		0.90024	0.70744	0.67358
1103.6		0.84286	0.70485	0.66357
1105.1		0.92098	0.69333	0.68946
1106.6		0.86975	0.71913	0.68952
1108.1		0.89087	0.70441	0.65648
1109.5		0.87737	0.70432	0.67416
1111		0.91121	0.70802	0.67314
1112.5		0.87131	0.70923	0.66576
1113.9		0.82764	0.70427	0.6674
1115.4		0.87629	0.71487	0.66873
1116.9		0.90603	0.69321	0.66733
1118.4		0.86803	0.70045	0.65301
1119.8		0.88528	0.71013	0.65342
1121.3		0.89514	0.67523	0.64032
1122.8		0.7645	0.71199	0.69685
1124.3		0.82125	0.71804	0.65234
1125.7		0.84887	0.72154	0.65
1127.2		0.92591	0.69567	0.68861
1128.7		0.88032	0.70084	0.68328
1130.2		0.87937	0.71338	0.68013
1131.6		0.85569	0.71159	0.6535
1133.1		0.87275	0.72357	0.65999
1134.6		0.88274	0.72491	0.65146
1136		0.92956	0.70171	0.67468
1137.5		0.86271	0.69485	0.67449
1139		0.82587	0.71912	0.6832
1140.5		0.85438	0.7283	0.66858
1141.9		0.9062	0.71911	0.65987
1143.4		0.9166	0.69853	0.64286
1144.9		0.87835	0.69442	0.64218
1146.4		0.89327	0.69977	0.68449
1147.8		0.856	0.71154	0.65992
1149.3		0.89785	0.69726	0.66309
1150.8		0.87224	0.72755	0.66996
1152.3		0.91267	0.71246	0.68548
1153.7		0.86741	0.71269	0.65489
1155.2		0.96721	0.69936	0.64013
1156.7		0.83587	0.69251	0.6633
1158.2		0.89797	0.69215	0.6552
1159.6		0.89196	0.71652	0.6554
1161.1		0.86799	0.70427	0.67629
1162.6		0.88156	0.70005	0.66071
1164		0.90901	0.70985	0.66027
1165.5		0.85826	0.70798	0.65965
1167		0.89519	0.71788	0.69694
1168.5		0.90807	0.7213	0.6717
1169.9		0.8769	0.71039	0.65107
1171.4		0.88393	0.71461	0.67768
1172.9		0.93523	0.7359	0.65644
1174.4		0.87267	0.71521	0.64888
1175.8		0.88716	0.6935	0.6536
1177.3		0.88308	0.70808	0.68164
1178.8		0.89187	0.70438	0.67137
1180.3		0.89556	0.72899	0.67962
1181.7		0.90424	0.71254	0.68283
1183.2		0.86888	0.7169	0.65725
1184.7		0.86425	0.72318	0.66434
1186.1		0.93297	0.71509	0.68734
1187.6		0.86325	0.70886	0.67283
1189.1		0.89711	0.71844	0.6725
1190.6		0.87214	0.71999	0.7014
1192		0.86709	0.70439	0.66621
1193.5		0.8488	0.72215	0.67585
1195		0.85576	0.70763	0.65724
1196.5		0.88102	0.71108	0.67544
1197.9		0.88232	0.70887	0.66848
1199.4		0.88678	0.72533	0.65793
1200.9		0.88474	0.71527	0.66476
1202.4		0.81828	0.70662	0.64304
1203.8		0.92805	0.7121	0.67504
1205.3		0.89903	0.70531	0.66834
1206.8		0.86584	0.72836	0.65261
1208.2		0.83965	0.69632	0.65311
1209.7		0.92894	0.70211	0.66691
1211.2		0.90586	0.71531	0.6566
1212.7		0.91605	0.72371	0.66258
1214.1		0.88225	0.70412	0.65351
1215.6		0.89111	0.71789	0.66351
1217.1		0.85628	0.7243	0.64052
1218.6		0.8835	0.72294	0.68095
1220		0.88531	0.72178	0.66392
1221.5		0.92058	0.72934	0.69807
1223		0.87746	0.71057	0.6973
1224.5		0.85891	0.74276	0.66961
1225.9		0.84868	0.7205	0.66931
1227.4		0.93202	0.72355	0.68235
1228.9		0.85759	0.73066	0.69114
1230.4		0.93486	0.74225	0.66068
1231.8		0.91289	0.71746	0.67967
1233.3		0.86259	0.72553	0.66941
1234.8		0.88891	0.7142	0.66378
1236.2		0.87856	0.7306	0.65486
1237.7		0.84753	0.72568	0.65668
1239.2		0.89364	0.7318	0.64624
1240.7		0.87209	0.72037	0.66912
1242.1		0.85515	0.72125	0.69221
1243.6		0.87485	0.71851	0.67393
1245.1		0.84903	0.6932	0.67574
1246.6		0.9114	0.73188	0.64836
1248		0.89411	0.71808	0.69892
1249.5		0.84437	0.71456	0.70142
1251		0.90131	0.72226	0.67219
1252.5		0.91275	0.73164	0.67617
1253.9		0.93894	0.72514	0.66065
1255.4		0.91415	0.72364	0.66919
1256.9		0.91738	0.70828	0.71502
1258.3		0.87005	0.70855	0.67488
1259.8		0.88783	0.72095	0.66061
1261.3		0.92305	0.71657	0.65788
1262.8		0.84193	0.736	0.68427
1264.2		0.84422	0.72426	0.67507
1265.7		0.87131	0.72904	0.69203
1267.2		0.88118	0.71862	0.66967
1268.7		0.84185	0.71891	0.66105
1270.1		0.89543	0.72736	0.68834
1271.6		0.88497	0.69313	0.6549
1273.1		0.8759	0.71364	0.65731
1274.6		0.89956	0.74337	0.67751
1276		0.82135	0.72346	0.6706
1277.5		0.85026	0.7162	0.67297
1279		0.85534	0.71176	0.69077
1280.4		0.85527	0.73125	0.68613
1281.9		0.87924	0.71971	0.68972
1283.4		0.91705	0.7219	0.6641
1284.9		0.87861	0.72627	0.70452
1286.3		0.87178	0.71329	0.69968
1287.8		0.84594	0.71537	0.67292
1289.3		0.93425	0.72967	0.68627
1290.8		0.85978	0.72869	0.6686
1292.2		0.87673	0.73314	0.69247
1293.7		0.84149	0.71706	0.67272
1295.2		0.92119	0.71891	0.70344
1296.7		0.9035	0.72124	0.67623
1298.1		0.88078	0.72729	0.68235
1299.6		0.9264	0.7256	0.67373
1301.1		0.9457	0.73413	0.64363
1302.6		0.89758	0.73185	0.71726
1304		0.89899	0.69759	0.67793
1305.5		0.91	0.72258	0.68871
1307		0.92124	0.69237	0.67802
1308.4		0.92299	0.73107	0.69254
1309.9		0.85487	0.74545	0.64953
1311.4		0.91368	0.74067	0.67777
1312.9		0.89791	0.73035	0.6965
1314.3		0.87668	0.73213	0.68249
1315.8		0.88509	0.6964	0.65951
1317.3		0.87477	0.72284	0.67693
1318.8		0.88441	0.71633	0.67896
1320.2		0.89942	0.72738	0.65893
1321.7		0.92607	0.7324	0.70361
1323.2		0.85186	0.70765	0.67797
1324.7		0.86904	0.7346	0.68095
1326.1		0.9355	0.73124	0.72779
1327.6		0.87925	0.7483	0.7008
1329.1		0.89765	0.73248	0.67229
1330.5		0.90873	0.72195	0.6806
1332		0.94153	0.72527	0.68886
1333.5		0.92356	0.71822	0.69488
1335		0.91774	0.72971	0.6879
1336.4		0.89079	0.72753	0.68227
1337.9		0.85407	0.71807	0.6914
1339.4		0.87471	0.7601	0.69001
1340.9		0.87471	0.72829	0.66773
1342.3		0.86225	0.7307	0.68999
1343.8		0.86452	0.72617	0.68278
1345.3		0.88192	0.72798	0.68392
1346.8		0.92291	0.76212	0.69318
1348.2		0.90074	0.72476	0.66507
1349.7		0.91632	0.70437	0.69823
1351.2		0.96975	0.73598	0.65892
1352.6		0.85103	0.71751	0.69039
1354.1		0.89402	0.73787	0.69336
1355.6		0.85092	0.72617	0.67834
1357.1		0.91132	0.73081	0.68766
1358.5		0.87393	0.73293	0.71042
1360		0.89337	0.742	0.69218
1361.5		0.87473	0.7237	0.70456
1363		0.87503	0.72066	0.67754
1364.4		0.84274	0.73501	0.71372
1365.9		0.87765	0.74131	0.69694
1367.4		0.82829	0.73759	0.66302
1368.9		0.90491	0.73675	0.69336
1370.3		0.9091	0.74039	0.68805
1371.8		0.91528	0.75429	0.67812
1373.3		0.90384	0.72813	0.6858
1374.8		0.84125	0.75323	0.68127
1376.2		0.87146	0.73488	0.67266
1377.7		0.89974	0.73748	0.67818
1379.2		0.8953	0.72375	0.68228

## Sheet: 3F
	Combined Dconfocal (um2s-1)	Standard Error	Percentage error	CCF2
PBS	33	1.98145	6.00366
Cytoplasm	16.3	0.759298	4.66389
Nucleus	23.7	1.15232	4.86218

## Sheet: 3H
Time axis (re-adjusted)	Pre-Bleach	PBS	Cytoplasm	Nucleus		CF514
-13.83	0.94229
-12.573	0.9775
-11.315	0.99789
-10.058	0.97913
-8.8008	0.96851
-7.5435	0.98764
-6.2863	0.95443
-5.029	1
-3.7718	0.95452
-2.5145	0.97854
-1.2573	0.96064
0		0.23557	0.10471	0.11359
1.2573		0.28873	0.13998	0.15682
2.5145		0.3161	0.19966	0.17977
3.7718		0.35109	0.19702	0.18828
5.029		0.39256	0.19617	0.22867
6.2863		0.41188	0.24464	0.27028
7.5435		0.44012	0.25623	0.26856
8.8008		0.46689	0.31536	0.33058
10.058		0.47025	0.30162	0.29336
11.315		0.47614	0.30902	0.33672
12.573		0.50365	0.3278	0.33919
13.83		0.52968	0.35252	0.36676
15.087		0.53089	0.36287	0.39748
16.344		0.54056	0.38616	0.36158
17.602		0.5585	0.40861	0.38434
18.859		0.53093	0.37209	0.40095
20.116		0.56432	0.40237	0.43042
21.373		0.57827	0.42833	0.40552
22.631		0.58217	0.42343	0.40667
23.888		0.59727	0.42821	0.45175
25.145		0.57556	0.42679	0.42621
26.402		0.60475	0.42106	0.43011
27.66		0.63435	0.4418	0.46234
28.917		0.61618	0.46152	0.46555
30.174		0.64075	0.46444	0.4904
31.431		0.63539	0.47806	0.48917
32.689		0.64827	0.50726	0.50409
33.946		0.65027	0.48555	0.50177
35.203		0.63358	0.49448	0.48971
36.46		0.64914	0.52183	0.50026
37.718		0.6722	0.49569	0.53211
38.975		0.67999	0.51838	0.49792
40.232		0.66985	0.51552	0.51508
41.489		0.69298	0.52172	0.50874
42.747		0.69595	0.50931	0.53996
44.004		0.6747	0.54049	0.52265
45.261		0.6748	0.53018	0.54743
46.519		0.71057	0.50888	0.5793
47.776		0.6966	0.5482	0.53791
49.033		0.70635	0.55193	0.53022
50.29		0.74124	0.54268	0.60213
51.548		0.70476	0.55099	0.55919
52.805		0.72074	0.57111	0.554
54.062		0.72089	0.56003	0.6017
55.319		0.72508	0.5602	0.55838
56.577		0.72375	0.55984	0.54733
57.834		0.73101	0.55613	0.61381
59.091		0.72365	0.57872	0.62273
60.348		0.72872	0.59211	0.59712
61.606		0.72773	0.55076	0.58082
62.863		0.73233	0.55795	0.61894
64.12		0.75526	0.60473	0.58361
65.377		0.73944	0.6036	0.59443
66.635		0.74227	0.59065	0.58319
67.892		0.74237	0.59932	0.61003
69.149		0.74717	0.58703	0.62092
70.406		0.75081	0.58648	0.59055
71.664		0.77509	0.58237	0.63515
72.921		0.76906	0.61441	0.61371
74.178		0.78457	0.58661	0.64603
75.435		0.75726	0.62239	0.63279
76.693		0.76058	0.631	0.6165
77.95		0.74028	0.61811	0.61745
79.207		0.76994	0.60752	0.62299
80.464		0.76597	0.63889	0.62119
81.722		0.76879	0.58533	0.63393
82.979		0.77504	0.61783	0.64237
84.236		0.76164	0.63589	0.57311
85.493		0.76604	0.64712	0.62376
86.751		0.79341	0.62044	0.61936
88.008		0.7824	0.6577	0.59769
89.265		0.78021	0.64462	0.61553
90.523		0.7801	0.65857	0.61557
91.78		0.78093	0.6388	0.68295
93.037		0.80003	0.6284	0.6924
94.294		0.77754	0.63054	0.62762
95.552		0.79879	0.63521	0.65214
96.809		0.7881	0.60737	0.68583
98.066		0.79869	0.64273	0.65239
99.323		0.77397	0.62542	0.6677
100.58		0.80617	0.66279	0.67182
101.84		0.78699	0.63122	0.66323
103.1		0.78172	0.60902	0.65429
104.35		0.80693	0.63239	0.65573
105.61		0.78036	0.65371	0.64775
106.87		0.78572	0.64357	0.65149
108.12		0.80594	0.64564	0.69466
109.38		0.8165	0.67045	0.66491
110.64		0.79462	0.69157	0.66301
111.9		0.82255	0.64651	0.67088
113.15		0.78664	0.66012	0.64841
114.41		0.80962	0.66994	0.66575
115.67		0.80739	0.67905	0.69081
116.92		0.82394	0.67259	0.69656
118.18		0.79329	0.67847	0.6899
119.44		0.79854	0.66587	0.65886
120.7		0.77699	0.70819	0.68447
121.95		0.8221	0.68781	0.64392
123.21		0.83347	0.68187	0.71918
124.47		0.84172	0.67765	0.7017
125.73		0.81744	0.65273	0.68489
126.98		0.7923	0.65779	0.69695
128.24		0.84214	0.69362	0.72059
129.5		0.83119	0.66084	0.69587
130.75		0.83038	0.66857	0.66591
132.01		0.82082	0.72159	0.65408
133.27		0.83892	0.6652	0.66682
134.53		0.82407	0.68787	0.68697
135.78		0.81043	0.65964	0.70265
137.04		0.82247	0.69204	0.73874
138.3		0.82593	0.68388	0.69296
139.56		0.83067	0.70091	0.70522
140.81		0.82022	0.71075	0.71592
142.07		0.81866	0.68494	0.71122
143.33		0.83933	0.69456	0.67784
144.58		0.83319	0.68801	0.70802
145.84		0.83032	0.72369	0.72523
147.1		0.82886	0.70724	0.69202
148.36		0.85582	0.71527	0.72125
149.61		0.82611	0.68492	0.7341
150.87		0.82236	0.68417	0.69433
152.13		0.86383	0.71183	0.67929
153.39		0.83846	0.71615	0.68862
154.64		0.84765	0.69896	0.71886
155.9		0.82845	0.67881	0.71337
157.16		0.82034	0.70383	0.70355
158.41		0.83984	0.68206	0.69918
159.67		0.8381	0.69433	0.71874
160.93		0.85715	0.71368	0.73474
162.19		0.83432	0.72225	0.70173
163.44		0.84777	0.70027	0.72382
164.7		0.84291	0.72925	0.73217
165.96		0.84195	0.65918	0.70803
167.22		0.86373	0.7075	0.74552
168.47		0.83362	0.71079	0.70047
169.73		0.85894	0.69639	0.7071
170.99		0.85076	0.69646	0.70897
172.24		0.86299	0.68609	0.69687
173.5		0.83461	0.72788	0.71759
174.76		0.87047	0.72144	0.75528
176.02		0.85511	0.70449	0.72635
177.27		0.87335	0.71454	0.70859
178.53		0.86392	0.72787	0.76127
179.79		0.83355	0.69698	0.73063
181.05		0.84662	0.72268	0.73981
182.3		0.86016	0.71929	0.75015
183.56		0.84307	0.70202	0.7256
184.82		0.86066	0.71314	0.73741
186.07		0.81927	0.73199	0.77444
187.33		0.84641	0.72968	0.73828
188.59		0.87448	0.74641	0.739
189.85		0.85919	0.7103	0.68756
191.1		0.82814	0.71104	0.75034
192.36		0.83044	0.71184	0.71654
193.62		0.85494	0.71802	0.71831
194.87		0.88312	0.70166	0.70486
196.13		0.83485	0.71534	0.73246
197.39		0.86354	0.73658	0.7357
198.65		0.84958	0.72771	0.72409
199.9		0.8498	0.72732	0.73781
201.16		0.8416	0.72475	0.72773
202.42		0.86532	0.74795	0.78119
203.68		0.82926	0.71612	0.74506
204.93		0.83779	0.7039	0.72348
206.19		0.88068	0.71961	0.76083
207.45		0.86693	0.71669	0.70357
208.7		0.85805	0.72992	0.73393
209.96		0.85408	0.73127	0.77114
211.22		0.85499	0.75428	0.75037
212.48		0.84867	0.75699	0.70481
213.73		0.87297	0.73797	0.74285
214.99		0.85914	0.74116	0.74427
216.25		0.87478	0.73245	0.74982
217.51		0.85654	0.71101	0.74639
218.76		0.89368	0.75448	0.7313
220.02		0.86224	0.70786	0.77238
221.28		0.87941	0.73672	0.75756
222.53		0.8307	0.74241	0.74721
223.79		0.85227	0.75377	0.76011
225.05		0.87152	0.7542	0.7445
226.31		0.8628	0.73956	0.75722
227.56		0.86855	0.76022	0.73741
228.82		0.8566	0.75564	0.75541
230.08		0.83775	0.75001	0.76503
231.34		0.85292	0.74734	0.76949
232.59		0.91946	0.73275	0.7511
233.85		0.88827	0.74052	0.75578
235.11		0.86535	0.76487	0.73161
236.36		0.86389	0.73113	0.73105
237.62		0.85505	0.74186	0.74718
238.88		0.86752	0.72596	0.74551
240.14		0.88143	0.73921	0.76869
241.39		0.88945	0.73194	0.75347
242.65		0.89304	0.72282	0.76908
243.91		0.89257	0.75038	0.76765
245.17		0.88567	0.73072	0.76328
246.42		0.86305	0.76748	0.75937
247.68		0.84994	0.75707	0.73194
248.94		0.90294	0.75746	0.78853
250.19		0.85535	0.72699	0.7639
251.45		0.86444	0.78412	0.74753
252.71		0.88184	0.72449	0.75788
253.97		0.87043	0.72796	0.76565
255.22		0.87703	0.77852	0.78322
256.48		0.86074	0.74141	0.75515
257.74		0.86517	0.79471	0.73921
258.99		0.90113	0.71158	0.75047
260.25		0.8757	0.7589	0.7376
261.51		0.888	0.75249	0.74816
262.77		0.86237	0.71837	0.73934
264.02		0.85388	0.78524	0.7805
265.28		0.92528	0.74912	0.71367
266.54		0.85587	0.74094	0.77572
267.8		0.85772	0.73547	0.73573
269.05		0.86467	0.75748	0.78829
270.31		0.86657	0.7618	0.79794
271.57		0.8793	0.75677	0.77481
272.82		0.89926	0.78221	0.77411
274.08		0.88109	0.72401	0.76802
275.34		0.86913	0.70779	0.79649
276.6		0.8903	0.76451	0.7532
277.85		0.89514	0.76758	0.78666
279.11		0.90156	0.74689	0.75884
280.37		0.85307	0.74731	0.77672
281.63		0.87144	0.78062	0.7727
282.88		0.88709	0.76423	0.74976
284.14		0.89071	0.7492	0.75889
285.4		0.89561	0.75826	0.73671
286.65		0.87293	0.73552	0.74777
287.91		0.90213	0.79954	0.80201
289.17		0.89061	0.77065	0.76489
290.43		0.89644	0.7437	0.78033
291.68		0.8909	0.76128	0.76381
292.94		0.89619	0.71319	0.7784
294.2		0.87966	0.76057	0.78263
295.46		0.88656	0.75092	0.76733
296.71		0.8962	0.74145	0.7878
297.97		0.8799	0.7722	0.7514
299.23		0.89601	0.75737	0.74956
300.48		0.89753	0.78588	0.74921
301.74		0.8731	0.79658	0.73222
303		0.88215	0.74108	0.79192
304.26		0.88438	0.73763	0.77027
305.51		0.89639	0.781	0.74715
306.77		0.89492	0.78441	0.76272
308.03		0.897	0.73232	0.75879
309.29		0.88748	0.75648	0.77033
310.54		0.90761	0.76624	0.76947
311.8		0.88903	0.77069	0.78954
313.06		0.86132	0.76162	0.7863
314.31		0.91012	0.75116	0.75156
315.57		0.8632	0.77155	0.76918
316.83		0.87908	0.80343	0.76902
318.09		0.91458	0.75918	0.7621
319.34		0.84112	0.79224	0.7781
320.6		0.88823	0.77968	0.75037
321.86		0.88634	0.75896	0.81779
323.12		0.91102	0.74397	0.79707
324.37		0.89121	0.81091	0.80542
325.63		0.86764	0.78098	0.82163
326.89		0.89496	0.77923	0.77944
328.14		0.88323	0.73264	0.76644
329.4		0.90888	0.76485	0.79752
330.66		0.91089	0.77159	0.80221
331.92		0.90267	0.79043	0.7859
333.17		0.90301	0.75338	0.78724
334.43		0.89493	0.74567	0.79796
335.69		0.88006	0.73862	0.80685
336.94		0.89109	0.74489	0.8117
338.2		0.88503	0.74855	0.80778
339.46		0.86133	0.76411	0.78106
340.72		0.88544	0.78388	0.74442
341.97		0.88397	0.76749	0.80125
343.23		0.88945	0.76404	0.80054
344.49		0.88562	0.78088	0.80748
345.75		0.91001	0.76275	0.78667
347		0.87481	0.76699	0.7802
348.26		0.89417	0.73653	0.78699
349.52		0.9111	0.78826	0.78041
350.77		0.88954	0.75482	0.80354
352.03		0.91383	0.76187	0.80127
353.29		0.88264	0.74717	0.75776
354.55		0.87595	0.77756	0.76572
355.8		0.89229	0.78343	0.78789
357.06		0.88919	0.72993	0.78537
358.32		0.8966	0.76277	0.76072
359.58		0.90446	0.73948	0.77321
360.83		0.90874	0.75703	0.77879
362.09		0.89936	0.81712	0.80209
363.35		0.9076	0.78881	0.77786
364.6		0.88434	0.76857	0.81446
365.86		0.92155	0.73835	0.78514
367.12		0.89084	0.77654	0.75278
368.38		0.8898	0.74914	0.80939
369.63		0.89415	0.72706	0.7482
370.89		0.88966	0.78028	0.80797
372.15		0.90067	0.75265	0.77535
373.41		0.87208	0.75806	0.79796
374.66		0.90379	0.78157	0.77087
375.92		0.89626	0.79469	0.79396
377.18		0.90333	0.78672	0.76584
378.43		0.91633	0.77396	0.83191
379.69		0.89125	0.80094	0.78561
380.95		0.88788	0.81407	0.80686
382.21		0.87742	0.78169	0.79576
383.46		0.89373	0.78429	0.81019
384.72		0.91669	0.76755	0.77019
385.98		0.87268	0.82015	0.80762
387.24		0.89289	0.79071	0.74869
388.49		0.90799	0.80713	0.81612
389.75		0.88187	0.80141	0.76638
391.01		0.89761	0.78453	0.77979
392.26		0.90409	0.76807	0.81359
393.52		0.85594	0.79485	0.78229
394.78		0.8879	0.79729	0.77364
396.04		0.87247	0.82721	0.82465
397.29		0.88195	0.76252	0.80573
398.55		0.89166	0.76113	0.79445
399.81		0.8939	0.80427	0.77538
401.07		0.92153	0.74111	0.81888
402.32		0.90794	0.78325	0.78516
403.58		0.88967	0.805	0.78134
404.84		0.87487	0.79467	0.76755
406.09		0.91163	0.75818	0.77717
407.35		0.90009	0.76812	0.77755
408.61		0.92309	0.79588	0.80605
409.87		0.90217	0.79485	0.86432
411.12		0.90921	0.77432	0.78152
412.38		0.89442	0.76365	0.76877
413.64		0.87662	0.76817	0.81104
414.89		0.91204	0.77222	0.81045
416.15		0.88212	0.7851	0.79725
417.41		0.89561	0.83551	0.76648
418.67		0.89052	0.79984	0.80423
419.92		0.89299	0.83205	0.78751
421.18		0.9006	0.76772	0.78514
422.44		0.91015	0.7926	0.82469
423.7		0.904	0.78046	0.82673
424.95		0.89786	0.73753	0.77662
426.21		0.92115	0.75797	0.81527
427.47		0.92337	0.76624	0.78267
428.72		0.90264	0.76678	0.82858
429.98		0.89095	0.77102	0.80174
431.24		0.89045	0.73234	0.79495
432.5		0.89666	0.79432	0.76823
433.75		0.94844	0.77737	0.77108
435.01		0.89617	0.80506	0.72633
436.27		0.88638	0.77535	0.75527
437.53		0.91119	0.76247	0.77344
438.78		0.89355	0.75113	0.84816
440.04		0.90814	0.76336	0.78176
441.3		0.87073	0.79398	0.81525
442.55		0.90953	0.76855	0.80949
443.81		0.91246	0.79409	0.81826
445.07		0.9199	0.81044	0.80891
446.33		0.90512	0.77883	0.77252
447.58		0.89223	0.80365	0.77632
448.84		0.88938	0.76188	0.80916
450.1		0.89167	0.77346	0.79131
451.36		0.9155	0.78259	0.83449
452.61		0.90856	0.75444	0.80755
453.87		0.90257	0.77028	0.77817
455.13		0.91153	0.81478	0.80126
456.38		0.90037	0.77722	0.80897
457.64		0.9132	0.78521	0.82264
458.9		0.90949	0.83104	0.76909
460.16		0.87729	0.76413	0.76419
461.41		0.88832	0.80126	0.81126
462.67		0.9089	0.79876	0.78059
463.93		0.91476	0.80059	0.79766
465.19		0.92568	0.82477	0.77873
466.44		0.89078	0.80291	0.78326
467.7		0.91955	0.76545	0.77428
468.96		0.89484	0.81095	0.80549
470.21		0.89356	0.7649	0.78699
471.47		0.90087	0.78864	0.78119
472.73		0.94629	0.79657	0.78633
473.99		0.92264	0.81322	0.80703
475.24		0.90171	0.78723	0.81457
476.5		0.8827	0.80296	0.79289
477.76		0.90509	0.78658	0.80928
479.02		0.92017	0.82645	0.78648
480.27		0.88748	0.79731	0.80338
481.53		0.88372	0.80427	0.77686
482.79		0.9092	0.80214	0.79074
484.04		0.92445	0.7755	0.83121
485.3		0.90109	0.79115	0.78047
486.56		0.90718	0.7867	0.78397
487.82		0.87911	0.80016	0.81739
489.07		0.90048	0.76868	0.82575
490.33		0.91566	0.75385	0.81731
491.59		0.91211	0.76235	0.81573
492.84		0.90005	0.78413	0.81839
494.1		0.92355	0.7715	0.81357
495.36		0.90936	0.779	0.7961
496.62		0.9008	0.81989	0.80721
497.87		0.91507	0.77292	0.79588
499.13		0.92067	0.77508	0.79759
500.39		0.9013	0.76922	0.77858
501.65		0.91437	0.82574	0.82536
502.9		0.89129	0.81527	0.78343
504.16		0.93027	0.78854	0.77722
505.42		0.89359	0.78888	0.79942
506.67		0.91211	0.78886	0.83286
507.93		0.91109	0.80339	0.77417
509.19		0.90881	0.81142	0.81242
510.45		0.90562	0.81077	0.83956
511.7		0.92933	0.77658	0.79641
512.96		0.88887	0.78969	0.78606
514.22		0.91466	0.80614	0.81198
515.48		0.87799	0.78973	0.79265
516.73		0.90689	0.8144	0.85561
517.99		0.91044	0.78008	0.8497
519.25		0.94177	0.81555	0.81557
520.5		0.89322	0.79715	0.78356
521.76		0.91147	0.80074	0.79297
523.02		0.90051	0.81598	0.77801
524.28		0.89138	0.80972	0.79161
525.53		0.93309	0.78178	0.78372
526.79		0.89928	0.80668	0.81016
528.05		0.86378	0.76365	0.80238
529.31		0.90994	0.79427	0.79721
530.56		0.90892	0.80672	0.79839
531.82		0.92456	0.8112	0.83803
533.08		0.90884	0.85156	0.76768
534.33		0.91263	0.80686	0.79882
535.59		0.90593	0.79325	0.76274
536.85		0.89786	0.79625	0.80479
538.11		0.8887	0.75993	0.81775
539.36		0.93011	0.80303	0.81954
540.62		0.93502	0.81912	0.8034
541.88		0.90267	0.76959	0.81808
543.14		0.91182	0.80613	0.78168
544.39		0.90446	0.80041	0.80269
545.65		0.88392	0.8029	0.83887
546.91		0.88901	0.79703	0.79053
548.16		0.92438	0.8046	0.81821
549.42		0.9081	0.7737	0.82837
550.68		0.9023	0.81642	0.78126
551.94		0.90198	0.75863	0.83595
553.19		0.90574	0.79594	0.78974
554.45		0.90426	0.81273	0.81835
555.71		0.87479	0.76187	0.78024
556.96		0.92131	0.83051	0.81507
558.22		0.92325	0.80356	0.78731
559.48		0.91768	0.81384	0.77795
560.74		0.90757	0.77619	0.81335
561.99		0.9188	0.81724	0.7913
563.25		0.90917	0.79528	0.79346
564.51		0.89224	0.81595	0.80986
565.77		0.91001	0.77949	0.84593
567.02		0.9291	0.78109	0.80564
568.28		0.91772	0.85148	0.79456
569.54		0.92445	0.80934	0.80066
570.79		0.91694	0.79496	0.80404
572.05		0.88884	0.8004	0.81341
573.31		0.88672	0.7929	0.78338
574.57		0.89779	0.83196	0.77683
575.82		0.91211	0.78747	0.77078
577.08		0.90795	0.82421	0.78935
578.34		0.902	0.78389	0.80086
579.6		0.89012	0.76569	0.79894
580.85		0.91267	0.82882	0.81138
582.11		0.92801	0.79402	0.81403
583.37		0.9027	0.83866	0.79462
584.62		0.89643	0.77259	0.79162
585.88		0.90699	0.77734	0.79601
587.14		0.93117	0.81034	0.8004
588.4		0.87838	0.79417	0.81785
589.65		0.89392	0.76743	0.83551
590.91		0.88944	0.80294	0.82882
592.17		0.91055	0.8247	0.80592
593.43		0.90115	0.79575	0.8849
594.68		0.91466	0.80089	0.79148
595.94		0.95184	0.80414	0.83283
597.2		0.93563	0.77957	0.82716
598.45		0.91184	0.8108	0.78589
599.71		0.93304	0.78832	0.81558
600.97		0.89438	0.84185	0.79195
602.23		0.90574	0.76483	0.83702
603.48		0.92186	0.81142	0.79818
604.74		0.897	0.79705	0.81204
606		0.94123	0.80044	0.80732
607.26		0.89917	0.78662	0.82063
608.51		0.91302	0.80163	0.7963
609.77		0.91226	0.79303	0.78941
611.03		0.90162	0.79659	0.82272
612.28		0.92422	0.79457	0.80839
613.54		0.89595	0.82088	0.8478
614.8		0.93305	0.76577	0.7945
616.06		0.88985	0.81233	0.84096
617.31		0.92824	0.78302	0.79432
618.57		0.9216	0.79434	0.82299
619.83		0.92723	0.80238	0.7929
621.09		0.91925	0.79545	0.8328
622.34		0.89782	0.80584	0.82361
623.6		0.91501	0.8187	0.85197
624.86		0.90096	0.83043	0.80872
626.11		0.92594	0.77539	0.81277
627.37		0.92644	0.82229	0.77619
628.63		0.90536	0.81598	0.78856
629.89		0.89652	0.79616	0.78767
631.14		0.90876	0.79819	0.84222
632.4		0.94296	0.80102	0.80507
633.66		0.92316	0.80041	0.8046
634.91		0.91687	0.81184	0.81565
636.17		0.89073	0.79467	0.84087
637.43		0.91798	0.80624	0.80087
638.69		0.88725	0.79326	0.81214
639.94		0.92346	0.78822	0.82113
641.2		0.91211	0.77696	0.80677
642.46		0.91639	0.80612	0.81413
643.72		0.91463	0.7737	0.83432
644.97		0.91767	0.7978	0.78359
646.23		0.89247	0.81657	0.78988
647.49		0.91527	0.78348	0.8137
648.74		0.87239	0.8189	0.79827
650		0.86463	0.79623	0.80911
651.26		0.91953	0.8053	0.82306
652.52		0.92176	0.80989	0.81591
653.77		0.93476	0.83263	0.82078
655.03		0.93151	0.78317	0.85504
656.29		0.89436	0.80887	0.79661
657.55		0.9127	0.85681	0.8367
658.8		0.94261	0.8141	0.81831
660.06		0.9064	0.81593	0.83172
661.32		0.92199	0.8247	0.79078
662.57		0.89821	0.80338	0.79047
663.83		0.91055	0.80292	0.81646
665.09		0.94505	0.76684	0.81798
666.35		0.90551	0.8204	0.81014
667.6		0.93813	0.81213	0.81123
668.86		0.90518	0.75982	0.84368
670.12		0.91638	0.81188	0.7853
671.38		0.91726	0.7927	0.83393
672.63		0.91161	0.841	0.81835
673.89		0.90559	0.80484	0.84208
675.15		0.88935	0.8088	0.84959
676.4		0.93844	0.80735	0.8146
677.66		0.90691	0.82514	0.81025
678.92		0.89686	0.83559	0.82131
680.18		0.90932	0.80611	0.81564
681.43		0.93189	0.83637	0.7962
682.69		0.91948	0.82092	0.80653
683.95		0.90639	0.77486	0.81663
685.21		0.92294	0.82657	0.83006
686.46		0.90434	0.8204	0.80511
687.72		0.90249	0.79401	0.81503
688.98		0.88595	0.78533	0.81313
690.23		0.91763	0.82885	0.80612
691.49		0.91638	0.83384	0.82271
692.75		0.92311	0.84928	0.79655
694.01		0.94442	0.78577	0.85181
695.26		0.91746	0.79341	0.84895
696.52		0.93098	0.84033	0.82038
697.78		0.90814	0.80116	0.84495
699.04		0.9293	0.77916	0.84092
700.29		0.91593	0.82566	0.80132
701.55		0.91092	0.83519	0.79971
702.81		0.91377	0.80787	0.81291
704.06		0.93019	0.80535	0.79533
705.32		0.91959	0.79256	0.83331
706.58		0.92209	0.83955	0.76822
707.84		0.90132	0.81001	0.8545
709.09		0.93724	0.85684	0.82612
710.35		0.90842	0.82795	0.82472
711.61		0.92195	0.84515	0.83494
712.86		0.88944	0.80674	0.82342
714.12		0.93787	0.81026	0.8242
715.38		0.93634	0.77955	0.80881
716.64		0.9251	0.78915	0.77437
717.89		0.92271	0.79504	0.80881
719.15		0.92502	0.821	0.79325
720.41		0.9317	0.8204	0.79593
721.67		0.93382	0.83005	0.84837
722.92		0.89834	0.7981	0.84543
724.18		0.89304	0.78612	0.80295
725.44		0.91918	0.79984	0.82498
726.69		0.91347	0.8158	0.81632
727.95		0.92028	0.78233	0.79679
729.21		0.93322	0.76824	0.83664
730.47		0.90397	0.81632	0.81443
731.72		0.92837	0.79365	0.76508
732.98		0.92139	0.82528	0.82701
734.24		0.91777	0.82199	0.80287
735.5		0.90985	0.8314	0.83278
736.75		0.88914	0.81993	0.81425
738.01		0.93101	0.79146	0.78008
739.27		0.91183	0.79479	0.8174
740.52		0.89159	0.83749	0.82725
741.78		0.91763	0.85179	0.80489
743.04		0.9125	0.8175	0.82988
744.3		0.91314	0.81242	0.83104
745.55		0.89351	0.83899	0.81112
746.81		0.9035	0.84775	0.80188
748.07		0.92743	0.78812	0.81529
749.33		0.92328	0.79036	0.79583
750.58		0.90697	0.81183	0.85593
751.84		0.93319	0.82737	0.81226
753.1		0.91582	0.80316	0.79083
754.35		0.93099	0.85504	0.87363
755.61		0.92817	0.80629	0.8288
756.87		0.92828	0.86099	0.8317
758.13		0.92168	0.79574	0.83416
759.38		0.90889	0.85193	0.84357
760.64		0.91313	0.76843	0.78291
761.9		0.93305	0.7771	0.84492
763.16		0.90089	0.82627	0.80053
764.41		0.89969	0.84116	0.82017
765.67		0.91658	0.7854	0.85254
766.93		0.90267	0.83056	0.84639
768.18		0.92869	0.8377	0.8335
769.44		0.92887	0.78193	0.835
770.7		0.91342	0.80152	0.82568
771.96		0.92183	0.81523	0.81701
773.21		0.95145	0.81802	0.83187
774.47		0.91769	0.84439	0.83496
775.73		0.9221	0.81071	0.81717
776.98		0.91734	0.78836	0.86335
778.24		0.92548	0.83465	0.82024
779.5		0.91385	0.80486	0.83704
780.76		0.90672	0.80732	0.82153
782.01		0.91976	0.78709	0.82039
783.27		0.92822	0.79756	0.83506
784.53		0.91761	0.79709	0.81894
785.79		0.93122	0.78664	0.80724
787.04		0.92661	0.77307	0.81896
788.3		0.93561	0.82014	0.80574
789.56		0.94887	0.79643	0.82743
790.81		0.91994	0.82163	0.78933
792.07		0.91011	0.77523	0.78963
793.33		0.91728	0.81336	0.82105
794.59		0.89629	0.80793	0.80772
795.84		0.90334	0.81611	0.84804
797.1		0.90134	0.79934	0.80824
798.36		0.91903	0.82242	0.82774
799.62		0.91234	0.80723	0.83485
800.87		0.90772	0.82775	0.84196
802.13		0.91912	0.81674	0.8337
803.39		0.92823	0.83052	0.79707
804.64		0.90261	0.83729	0.82329
805.9		0.9194	0.88366	0.80961
807.16		0.92094	0.78948	0.80719
808.42		0.92528	0.81936	0.79252
809.67		0.94156	0.801	0.82501
810.93		0.89985	0.84197	0.83963
812.19		0.89875	0.8355	0.84832
813.45		0.91975	0.81643	0.81829
814.7		0.90101	0.82815	0.78334
815.96		0.93148	0.83373	0.82142
817.22		0.9404	0.82211	0.83069
818.47		0.9426	0.80257	0.7955
819.73		0.91515	0.81119	0.81312
820.99		0.93855	0.82098	0.82173
822.25		0.90362	0.84343	0.80454
823.5		0.91715	0.79022	0.81822
824.76		0.91781	0.82045	0.8169
826.02		0.92245	0.85277	0.82421
827.28		0.92773	0.78567	0.82159
828.53		0.90673	0.8262	0.83096
829.79		0.929	0.84821	0.83368
831.05		0.92006	0.83239	0.8239
832.3		0.91587	0.80399	0.84302
833.56		0.92749	0.82666	0.81915
834.82		0.90918	0.84198	0.82793
836.08		0.90241	0.8382	0.81185
837.33		0.9098	0.82556	0.7949
838.59		0.91745	0.8169	0.7939
839.85		0.94223	0.8366	0.83428
841.11		0.89184	0.80994	0.82479
842.36		0.9141	0.85247	0.85439
843.62		0.93434	0.84963	0.87079
844.88		0.90894	0.85926	0.85842
846.13		0.92457	0.83039	0.78541
847.39		0.91826	0.80858	0.8166
848.65		0.92052	0.79815	0.83527
849.91		0.92043	0.78375	0.8366
851.16		0.9322	0.81249	0.83486
852.42		0.93614	0.8094	0.8107
853.68		0.91438	0.80545	0.82829
854.93		0.91852	0.79564	0.79745
856.19		0.8959	0.81886	0.82118
857.45		0.93353	0.85348	0.79437
858.71		0.91222	0.80001	0.82809
859.96		0.91266	0.83544	0.84694
861.22		0.8987	0.81741	0.83112
862.48		0.91447	0.79268	0.83812
863.74		0.92615	0.82297	0.81221
864.99		0.91168	0.82917	0.83172
866.25		0.9142	0.83518	0.80877
867.51		0.91684	0.80017	0.81484
868.76		0.92288	0.85156	0.8544
870.02		0.91018	0.81522	0.80526
871.28		0.8999	0.8129	0.82918
872.54		0.932	0.79052	0.82808
873.79		0.93401	0.80934	0.82444
875.05		0.89998	0.79339	0.8211
876.31		0.93977	0.80876	0.82172
877.57		0.92246	0.80282	0.83153
878.82		0.93124	0.81406	0.79939
880.08		0.89049	0.76412	0.84333
881.34		0.93279	0.80624	0.8183
882.59		0.91458	0.85614	0.83093
883.85		0.9338	0.80763	0.81294
885.11		0.90867	0.80352	0.86491
886.37		0.90186	0.81582	0.81122
887.62		0.92072	0.8634	0.85493
888.88		0.90385	0.83924	0.82261
890.14		0.91062	0.8337	0.81202
891.4		0.93066	0.83346	0.80639
892.65		0.91355	0.79503	0.83174
893.91		0.91429	0.84638	0.8435
895.17		0.89824	0.82144	0.82116
896.42		0.92304	0.83506	0.85559
897.68		0.92044	0.85119	0.82322
898.94		0.91859	0.84374	0.8188
900.2		0.91426	0.86421	0.83183
901.45		0.90485	0.83576	0.83797
902.71		0.88677	0.81592	0.80327
903.97		0.9254	0.81374	0.81188
905.23		0.93528	0.7941	0.81354
906.48		0.90932	0.85651	0.86204
907.74		0.88759	0.82339	0.83953
909		0.90623	0.82376	0.84953
910.25		0.93223	0.84274	0.84657
911.51		0.92981	0.78868	0.82111
912.77		0.93192	0.81332	0.84406
914.03		0.91833	0.7953	0.84336
915.28		0.92595	0.81646	0.85011
916.54		0.90183	0.80359	0.84237
917.8		0.91436	0.85652	0.77043
919.06		0.91412	0.79691	0.79327
920.31		0.93392	0.81078	0.8178
921.57		0.925	0.81877	0.84034
922.83		0.92173	0.81734	0.8131
924.08		0.89096	0.81213	0.81611
925.34		0.91219	0.81969	0.83723
926.6		0.90681	0.8121	0.83695
927.86		0.90647	0.79699	0.81314
929.11		0.91814	0.80856	0.83931
930.37		0.91845	0.83699	0.79987
931.63		0.91543	0.82249	0.7741
932.88		0.92734	0.8344	0.84941
934.14		0.90017	0.83518	0.8046
935.4		0.92089	0.79497	0.80831
936.66		0.91712	0.7802	0.86971
937.91		0.93088	0.83744	0.84777
939.17		0.934	0.84188	0.83254
940.43		0.91155	0.81271	0.82718
941.69		0.95918	0.81108	0.81446
942.94		0.93391	0.83122	0.82865
944.2		0.90832	0.83305	0.85014
945.46		0.93766	0.82986	0.82505
946.71		0.91362	0.80139	0.82885
947.97		0.92468	0.81673	0.81797
949.23		0.89917	0.82245	0.80142
950.49		0.92255	0.84331	0.83988
951.74		0.95786	0.82886	0.85221
953		0.91546	0.82072	0.82701
954.26		0.91573	0.81413	0.85248
955.52		0.91483	0.84812	0.81937
956.77		0.90121	0.83601	0.84255
958.03		0.9178	0.8266	0.84378
959.29		0.93099	0.81148	0.83068
960.54		0.93385	0.82891	0.80101
961.8		0.95124	0.8217	0.79549
963.06		0.89815	0.83642	0.85215
964.32		0.91819	0.83822	0.83062
965.57		0.91	0.82532	0.88243
966.83		0.91712	0.85746	0.82323
968.09		0.89903	0.81643	0.80394
969.35		0.93506	0.81826	0.83705
970.6		0.91804	0.8429	0.82626
971.86		0.92323	0.83918	0.82055
973.12		0.90906	0.82646	0.84144
974.37		0.92995	0.84987	0.82048
975.63		0.9263	0.86756	0.84616
976.89		0.89518	0.82318	0.85546
978.15		0.89526	0.85465	0.80473
979.4		0.8978	0.83374	0.8257
980.66		0.93074	0.81938	0.81165
981.92		0.91857	0.81325	0.83522
983.18		0.89967	0.79269	0.82295
984.43		0.92987	0.80523	0.82135
985.69		0.92052	0.82566	0.79704
986.95		0.91688	0.80705	0.81196
988.2		0.9442	0.8129	0.81902
989.46		0.90447	0.82088	0.80644
990.72		0.90282	0.82054	0.82361
991.98		0.90319	0.80808	0.84615
993.23		0.92281	0.82784	0.80495
994.49		0.90561	0.81261	0.81169
995.75		0.94907	0.85857	0.81118
997.01		0.93519	0.82289	0.82011
998.26		0.92333	0.82492	0.85463
999.52		0.93372	0.85584	0.81756
1000.8		0.90442	0.79512	0.79606
1002		0.91285	0.8036	0.81842
1003.3		0.89542	0.85766	0.81002
1004.5		0.94368	0.81866	0.8256
1005.8		0.93705	0.82146	0.80632
1007.1		0.9244	0.87439	0.83743
1008.3		0.90492	0.80813	0.84199
1009.6		0.92834	0.79604	0.82202
1010.8		0.9245	0.87698	0.80597
1012.1		0.9311	0.81502	0.8302
1013.3		0.91217	0.82142	0.83394
1014.6		0.94111	0.85358	0.81756
1015.9		0.90337	0.8085	0.81561
1017.1		0.90549	0.81145	0.83808
1018.4		0.91857	0.80676	0.85091
1019.6		0.92186	0.80398	0.81918
1020.9		0.90541	0.8154	0.80464
1022.2		0.90044	0.828	0.80566
1023.4		0.92828	0.81698	0.81695
1024.7		0.90388	0.80873	0.79296
1025.9		0.92689	0.81946	0.81484
1027.2		0.92651	0.81861	0.83814
1028.4		0.93024	0.88388	0.82313
1029.7		0.92017	0.82855	0.84069
1031		0.90634	0.81624	0.86026
1032.2		0.92891	0.83551	0.80349
1033.5		0.90547	0.82116	0.81191
1034.7		0.93634	0.83091	0.83914
1036		0.93817	0.81867	0.82189
1037.2		0.92478	0.83395	0.82157
1038.5		0.89563	0.81522	0.84545
1039.8		0.92643	0.85827	0.82751
1041		0.93834	0.84396	0.82401
1042.3		0.93508	0.83676	0.79498
1043.5		0.89675	0.89388	0.81978
1044.8		0.94504	0.81746	0.82188
1046		0.9178	0.8181	0.88321
1047.3		0.91954	0.80969	0.85434
1048.6		0.92009	0.82697	0.82301
1049.8		0.90671	0.84296	0.8182
1051.1		0.91204	0.81176	0.8372
1052.3		0.91218	0.82729	0.80465
1053.6		0.9195	0.80938	0.80999
1054.8		0.89551	0.83506	0.85444
1056.1		0.91431	0.83092	0.86528
1057.4		0.87995	0.82617	0.79953
1058.6		0.94251	0.84546	0.83962
1059.9		0.93559	0.83778	0.84609
1061.1		0.91626	0.86741	0.81286
1062.4		0.91834	0.83594	0.84505
1063.6		0.95438	0.81018	0.82647
1064.9		0.91428	0.82932	0.80981
1066.2		0.92252	0.80693	0.82204
1067.4		0.9296	0.79619	0.81846
1068.7		0.92391	0.81815	0.85103
1069.9		0.93169	0.79493	0.84399
1071.2		0.95095	0.82562	0.84194
1072.4		0.91509	0.83915	0.83124
1073.7		0.93371	0.80816	0.77985
1075		0.91076	0.82175	0.84953
1076.2		0.90026	0.83103	0.82925
1077.5		0.91887	0.83732	0.86801
1078.7		0.9206	0.82497	0.86204
1080		0.92335	0.85471	0.8482
1081.2		0.90182	0.81369	0.85172
1082.5		0.91162	0.83134	0.84722
1083.8		0.92378	0.8271	0.81325
1085		0.90714	0.80119	0.87418
1086.3		0.88142	0.82603	0.83477
1087.5		0.92408	0.84835	0.84414
1088.8		0.91932	0.82415	0.85025
1090		0.92009	0.83013	0.82457
1091.3		0.93136	0.8404	0.84793
1092.6		0.91728	0.82608	0.8226
1093.8		0.94213	0.87777	0.82781
1095.1		0.92859	0.8041	0.84123
1096.3		0.90568	0.8343	0.83469
1097.6		0.91978	0.80675	0.84417
1098.8		0.92351	0.79817	0.87119
1100.1		0.90915	0.83285	0.80038
1101.4		0.9045	0.83926	0.84851
1102.6		0.94335	0.80856	0.83679
1103.9		0.93602	0.84483	0.80064
1105.1		0.93964	0.83803	0.81412
1106.4		0.92576	0.85074	0.82879
1107.6		0.89708	0.804	0.83285
1108.9		0.93893	0.83503	0.85586
1110.2		0.93141	0.83974	0.82829
1111.4		0.91476	0.86205	0.83239
1112.7		0.91317	0.82756	0.81765
1113.9		0.89702	0.84372	0.85196
1115.2		0.9253	0.83248	0.8452
1116.4		0.93318	0.83663	0.81587
1117.7		0.92316	0.87841	0.8331
1119		0.9305	0.83198	0.85354
1120.2		0.93486	0.82125	0.86524
1121.5		0.90777	0.81861	0.81825
1122.7		0.93459	0.84133	0.82088
1124		0.91521	0.82199	0.85023
1125.2		0.91177	0.83693	0.85637
1126.5		0.88997	0.82787	0.84823
1127.8		0.95925	0.86012	0.84335
1129		0.95325	0.81411	0.82268
1130.3		0.93188	0.8405	0.81411
1131.5		0.9183	0.86134	0.83167
1132.8		0.90665	0.80394	0.86317
1134		0.94088	0.83863	0.83012
1135.3		0.93492	0.82122	0.82784
1136.6		0.94276	0.8305	0.80179
1137.8		0.92166	0.84562	0.83058
1139.1		0.905	0.81576	0.82852
1140.3		0.91574	0.8475	0.82037
1141.6		0.92613	0.84853	0.82459
1142.8		0.91568	0.80642	0.81026
1144.1		0.92006	0.81538	0.81437
1145.4		0.93271	0.84644	0.80893
1146.6		0.92124	0.84491	0.83516
1147.9		0.92428	0.81949	0.82861
1149.1		0.93793	0.83787	0.87261
1150.4		0.92146	0.83675	0.82794
1151.6		0.93981	0.82773	0.82305
1152.9		0.9126	0.81343	0.80868
1154.2		0.91537	0.8714	0.81835
1155.4		0.90547	0.83493	0.84392
1156.7		0.94106	0.82712	0.86653
1157.9		0.90588	0.82515	0.83779
1159.2		0.94737	0.86392	0.83275
1160.4		0.94388	0.85816	0.80442
1161.7		0.94435	0.81835	0.81155
1163		0.9026	0.82861	0.80632
1164.2		0.96984	0.83056	0.84405
1165.5		0.93906	0.80841	0.85298
1166.7		0.93092	0.83048	0.86753
1168		0.91259	0.82481	0.8499
1169.2		0.92592	0.82968	0.83886
1170.5		0.92698	0.84465	0.83419
1171.8		0.91913	0.83579	0.83622
1173		0.91388	0.81758	0.8348
1174.3		0.92359	0.83307	0.84014
1175.5		0.92808	0.82192	0.83565
1176.8		0.918	0.84113	0.85898
1178.1		0.91467	0.86759	0.82521
1179.3
1180.6
1181.8
1183.1
1184.3
1185.6
1186.9
1188.1
1189.4
1190.6
1191.9
1193.1
1194.4
1195.7
1196.9
1198.2
1199.4
1200.7
1201.9
1203.2
1204.5
1205.7
1207
1208.2
1209.5
1210.7
1212
1213.3
1214.5
1215.8
1217
1218.3
1219.5
1220.8
1222.1
1223.3
1224.6
1225.8
1227.1
1228.3
1229.6
1230.9
1232.1
1233.4
1234.6
1235.9
1237.1
1238.4
1239.7
1240.9
1242.2
1243.4
1244.7
1245.9
1247.2
1248.5
1249.7
1251
1252.2
1253.5
1254.7
1256

## Sheet: 3I
	Combined Dconfocal (um2s-1)	Standard Error	Percentage error		CF514
PBS	61.145	2.9934	4.89557
Cytoplasm	26.266	1.89512	7.2152
Nucleus	29.247	1.99499	6.82122
