# Supplementary material for: Reversing protonation of weakly basic drugs greatly enhances intracellular diffusion and decreases lysosomal sequestration
Source: eLife. 2024 Dec 6;13:RP97255. doi: 10.7554/eLife.97255 (PMC11623935; doi:10.7554/eLife.97255)
Supplement: Figure 4—figure supplement 1—source data 1. [file elife-97255-fig4-figsupp1-data1.xlsx]

## Sheet: F4-FS1-A
Time axis (re-adjusted)	Pre-Bleach	2 micro Molar	6 micro Molar	10 micro Molar
-12.819	1
-11.394	1.0073					Dose dependency GSK3 inhibitor
-9.97	1.0019
-8.5457	1.0017
7.1214	0.98605
-5.6971	1.0032
-4.2729	1.006
-2.8486	0.99207
-1.4243	0.97854
0		0.10784	0.11142	0.085172
1.4243		0.10732	0.11589	0.081956
2.8486		0.1118	0.12032	0.085251
4.2729		0.11333	0.12096	0.090669
5.6971		0.11841	0.12598	0.091408
7.1214		0.1242	0.12788	0.097763
8.5457		0.12088	0.12837	0.085902
9.97		0.11801	0.12072	0.097678
11.394		0.12363	0.13406	0.09436
12.819		0.11816	0.12513	0.1028
14.243		0.12736	0.14118	0.10613
15.667		0.13047	0.13641	0.10561
17.091		0.13946	0.1402	0.10268
18.516		0.13495	0.13868	0.11216
19.94		0.12992	0.14034	0.11106
21.364		0.1289	0.1455	0.10226
22.789		0.12847	0.13596	0.11805
24.213		0.13458	0.13994	0.11685
25.637		0.14109	0.14255	0.1163
27.061		0.13132	0.13794	0.12183
28.486		0.13647	0.14902	0.11541
29.91		0.13548	0.14006	0.12477
31.334		0.1379	0.14934	0.11248
32.759		0.13156	0.15301	0.12505
34.183		0.14215	0.1568	0.13011
35.607		0.14349	0.15159	0.11616
37.031		0.13746	0.16644	0.12453
38.456		0.13749	0.15315	0.12174
39.88		0.14003	0.15323	0.12539
41.304		0.1462	0.14893	0.12302
42.729		0.13684	0.15907	0.13488
44.153		0.13725	0.15411	0.13118
45.577		0.143	0.14441	0.12607
47.001		0.14288	0.15746	0.13037
48.426		0.14947	0.15367	0.13071
49.85		0.14443	0.1554	0.14457
51.274		0.14318	0.15573	0.14029
52.699		0.1477	0.16484	0.12891
54.123		0.14983	0.15771	0.14727
55.547		0.14719	0.16259	0.14006
56.971		0.14527	0.15493	0.15128
58.396		0.14797	0.15452	0.14831
59.82		0.14658	0.15262	0.14742
61.244		0.15375	0.15818	0.14731
62.669		0.14713	0.16561	0.14385
64.093		0.15796	0.16291	0.14534
65.517		0.14906	0.16604	0.13646
66.941		0.15274	0.16369	0.15636
68.366		0.15502	0.16402	0.15575
69.79		0.15694	0.1644	0.15571
71.214		0.15616	0.16946	0.1522
72.639		0.16135	0.16083	0.14219
74.063		0.15705	0.16773	0.17175
75.487		0.15684	0.16254	0.15063
76.911		0.15126	0.166	0.15517
78.336		0.15814	0.16799	0.15966
79.76		0.16418	0.17735	0.16459
81.184		0.16035	0.16793	0.17282
82.609		0.15871	0.16884	0.17985
84.033		0.1599	0.17375	0.15388
85.457		0.15671	0.16609	0.17445
86.881		0.15624	0.17797	0.16379
88.306		0.16475	0.17703	0.16154
89.73		0.16286	0.17573	0.18018
91.154		0.16456	0.16862	0.16918
92.579		0.15889	0.16819	0.1593
94.003		0.17135	0.16713	0.17766
95.427		0.16464	0.18102	0.16178
96.851		0.1704	0.18467	0.17383
98.276		0.16458	0.17151	0.16089
99.7		0.16173	0.16581	0.17692
101.12		0.17023	0.1829	0.17501
102.55		0.1679	0.17967	0.17822
103.97		0.16379	0.17483	0.1799
105.4		0.16696	0.17018	0.17712
106.82		0.16769	0.17393	0.18704
108.25		0.16546	0.18021	0.17395
109.67		0.17268	0.18064	0.18754
111.09		0.16809	0.17656	0.17869
112.52		0.16966	0.18672	0.18385
113.94		0.16603	0.17373	0.19015
115.37		0.17764	0.17899	0.19062
116.79		0.16947	0.17044	0.18665
118.22		0.17246	0.18553	0.17903
119.64		0.17684	0.19151	0.19698
121.06		0.18107	0.19006	0.19588
122.49		0.16551	0.17421	0.2029
123.91		0.16844	0.18315	0.18446
125.34		0.17173	0.18456	0.19054
126.76		0.17579	0.18634	0.19753
128.19		0.17776	0.18651	0.18066
129.61		0.18056	0.17991	0.19258
131.03		0.1752	0.1823	0.19893
132.46		0.18041	0.18302	0.18198
133.88		0.18287	0.18882	0.19626
135.31		0.18185	0.19012	0.1872
136.73		0.18362	0.18292	0.20509
138.16		0.1771	0.19379	0.20295
139.58		0.17457	0.1822	0.2112
141		0.18263	0.1894	0.19854
142.43		0.17306	0.18921	0.20322
143.85		0.17399	0.18493	0.21281
145.28		0.18024	0.19237	0.20956
146.7		0.18536	0.18523	0.20718
148.13		0.18316	0.19594	0.22094
149.55		0.17792	0.19078	0.21616
150.97		0.17928	0.18809	0.20325
152.4		0.18092	0.19345	0.2111
153.82		0.18291	0.19616	0.20152
155.25		0.17382	0.18611	0.2185
156.67		0.18884	0.20176	0.21878
158.1		0.18332	0.19821	0.20699
159.52		0.18768	0.19141	0.21345
160.94		0.18214	0.18946	0.21584
162.37		0.18409	0.1939	0.21374
163.79		0.19529	0.20445	0.20421
165.22		0.18107	0.19757	0.224
166.64		0.17837	0.19828	0.21131
168.07		0.18252	0.20303	0.21303
169.49		0.18603	0.19953	0.23922
170.91		0.18277	0.20131	0.2178
172.34		0.18456	0.19309	0.20272
173.76		0.19105	0.19817	0.23454
175.19		0.18716	0.19772	0.2286
176.61		0.18448	0.20138	0.21906
178.04		0.18945	0.19739	0.22832
179.46		0.19515	0.203	0.2268
180.88		0.18813	0.20355	0.21677
182.31		0.18392	0.20143	0.21797
183.73		0.19339	0.20847	0.23789
185.16		0.18899	0.19814	0.24599
186.58		0.19471	0.21431	0.21848
188.01		0.18976	0.2044	0.22784
189.43		0.19444	0.21131	0.2281
190.85		0.19223	0.19847	0.22491
192.28		0.19525	0.19538	0.23531
193.7		0.18506	0.20651	0.23549
195.13		0.19677	0.1981	0.22435
196.55		0.19995	0.19743	0.21746
197.98		0.20775	0.21394	0.23663
199.4		0.192	0.19859	0.21895
200.82		0.19761	0.20944	0.22347
202.25		0.19304	0.20065	0.2352
203.67		0.196	0.20527	0.23475
205.1		0.19261	0.20691	0.2292
206.52		0.19903	0.21056	0.2346
207.95		0.19952	0.19718	0.23152
209.37		0.19999	0.2082	0.23956
210.79		0.19868	0.20184	0.22888
212.22		0.19157	0.20213	0.23711
213.64		0.19904	0.20289	0.24112
215.07		0.20562	0.20807	0.25113
216.49		0.19877	0.21727	0.23307
217.92		0.19634	0.20293	0.23489
219.34		0.19718	0.21607	0.25818
220.76		0.19048	0.21405	0.22858
222.19		0.20838	0.2083	0.24992
223.61		0.2022	0.2101	0.244
225.04		0.19841	0.2034	0.24818
226.46		0.19695	0.20935	0.25281
227.89		0.20808	0.19668	0.24895
229.31		0.21006	0.20005	0.25033
230.73		0.1974	0.20526	0.24869
232.16		0.19469	0.21152	0.25667
233.58		0.1994	0.21577	0.24649
235.01		0.20127	0.2153	0.25541
236.43		0.19625	0.21695	0.26197
237.86		0.20526	0.21145	0.2517
239.28		0.21312	0.22025	0.23964
240.7		0.20507	0.2136	0.26718
242.13		0.20299	0.21709	0.25463
243.55		0.20632	0.21856	0.25939
244.98		0.20362	0.21317	0.2637
246.4		0.20891	0.21695	0.26036
247.83		0.20707	0.21073	0.26548
249.25		0.20493	0.21096	0.25052
250.67		0.21027	0.21234	0.26626
252.1		0.20968	0.21813	0.25805
253.52		0.20468	0.21584	0.2641
254.95		0.20705	0.2102	0.25854
256.37		0.20003	0.21899	0.2488
257.8		0.21936	0.21438	0.27319
259.22		0.20969	0.21895	0.2664
260.64		0.20672	0.22411	0.26891
262.07		0.20451	0.22212	0.26199
263.49		0.21413	0.23084	0.25275
264.92		0.21583	0.22517	0.27342
266.34		0.20703	0.21548	0.25948
267.77		0.20987	0.22508	0.26646
269.19		0.20634	0.22749	0.24313
270.61		0.20424	0.21253	0.27089
272.04		0.21228	0.22834	0.26424
273.46		0.21187	0.22496	0.25985
274.89		0.21886	0.22187	0.26172
276.31		0.21546	0.22415	0.28242
277.74		0.21906	0.2324	0.25461
279.16		0.20944	0.22654	0.26506
280.58		0.21269	0.22255	0.26265
282.01		0.21137	0.22041	0.26839
283.43		0.21494	0.21364	0.26733
284.86		0.21706	0.22616	0.26416
286.28		0.20921	0.23008	0.26854
287.71		0.22067	0.22738	0.27482
289.13		0.21542	0.23036	0.29579
290.55		0.21254	0.22426	0.28275
291.98		0.2105	0.23299	0.2731
293.4		0.20395	0.23692	0.28943
294.83		0.21543	0.22943	0.27877
296.25		0.21852	0.21598	0.27386
297.68		0.21952	0.22833	0.26127
299.1		0.21358	0.21714	0.28778
300.52		0.2106	0.22601	0.28309
301.95		0.21294	0.22112	0.28257
303.37		0.22077	0.22504	0.28519
304.8		0.22042	0.22973	0.27282
306.22		0.21002	0.23778	0.2715
307.65		0.2194	0.21935	0.29115
309.07		0.21933	0.22824	0.29344
310.49		0.21844	0.23189	0.28187
311.92		0.23355	0.23612	0.27725
313.34		0.21535	0.23367	0.27751
314.77		0.22189	0.23398	0.28
316.19		0.23216	0.22724	0.27934
317.62		0.23278	0.22314	0.28476
319.04		0.21913	0.23463	0.28049
320.46		0.22304	0.23039	0.28789
321.89		0.21828	0.22323	0.27047
323.31		0.21627	0.23801	0.28095
324.74		0.22377	0.23614	0.30872
326.16		0.22223	0.21431	0.29293
327.59		0.21678	0.23456	0.30865
329.01		0.22656	0.22697	0.2895
330.43		0.22406	0.24916	0.27721
331.86		0.21738	0.23999	0.27888
333.28		0.22373	0.22616	0.29764
334.71		0.23059	0.23088	0.29652
336.13		0.21934	0.2364	0.30261
337.56		0.22081	0.23267	0.29449
338.98		0.22211	0.23848	0.30209
340.4		0.23179	0.24272	0.29472
341.83		0.2231	0.23582	0.29152
343.25		0.21837	0.23818	0.29001
344.68		0.21668	0.24115	0.2931
346.1		0.22604	0.23341	0.29242
347.53		0.22398	0.24737	0.29416
348.95		0.21893	0.2373	0.29749
350.37		0.23194	0.2331	0.30258
351.8		0.23232	0.23803	0.28517
353.22		0.22821	0.2461	0.30135
354.65		0.2308	0.2248	0.31094
356.07		0.23041	0.23301	0.30264
357.5		0.23981	0.23731	0.30626
358.92		0.22091	0.23822	0.30285
360.34		0.23045	0.24106	0.31304
361.77		0.2256	0.24111	0.31289
363.19		0.24017	0.24304	0.30479
364.62		0.23273	0.24052	0.29277
366.04		0.22725	0.24715	0.29939
367.47		0.22276	0.2436	0.30787
368.89		0.23361	0.2397	0.31789
370.31		0.23912	0.2426	0.30702
371.74		0.23452	0.24761	0.31351
373.16		0.22203	0.23958	0.31584
374.59		0.24036	0.23546	0.28964
376.01		0.23094	0.23655	0.31425
377.44		0.23655	0.24143	0.29872
378.86		0.22654	0.25551	0.31615
380.28		0.23374	0.25106	0.31078
381.71		0.22706	0.24802	0.29638
383.13		0.23339	0.24235	0.30641
384.56		0.23145	0.23741	0.31517
385.98		0.2325	0.25091	0.30858
387.41		0.24674	0.24199	0.31985
388.83		0.23759	0.24165	0.30604
390.25		0.23373	0.25198	0.31543
391.68		0.23556	0.24276	0.32505
393.1		0.23886	0.25601	0.3183
394.53		0.22727	0.24104	0.31974
395.95		0.23678	0.24703	0.31654
397.38		0.24439	0.24969	0.32703
398.8		0.24171	0.26209	0.32839
400.22		0.23119	0.25498	0.30818
401.65		0.23362	0.24759	0.32166
403.07		0.23795	0.25327	0.31691
404.5		0.24555	0.25323	0.30333
405.92		0.23623	0.2525	0.30981
407.35		0.22953	0.24625	0.3318
408.77		0.24677	0.24187	0.31632
410.19		0.24491	0.24772	0.329
411.62		0.2315	0.26111	0.3022
413.04		0.2333	0.24765	0.33561
414.47		0.24207	0.24525	0.32471
415.89		0.24803	0.24446	0.32131
417.32		0.23549	0.25156	0.30993
418.74		0.24019	0.24923	0.32022
420.16		0.24614	0.2467	0.31956
421.59		0.23612	0.25472	0.32677
423.01		0.23536	0.2402	0.34743
424.44		0.23721	0.24525	0.32235
425.86		0.23435	0.25007	0.33189
427.29		0.238	0.2448	0.32723
428.71		0.24253	0.25159	0.33291
430.13		0.24142	0.26179	0.34532
431.56		0.24274	0.24963	0.30434
432.98		0.23491	0.25277	0.3184
434.41		0.24877	0.25423	0.34608
435.83		0.24648	0.25579	0.33009
437.26		0.23817	0.25672	0.33981
438.68		0.24416	0.24063	0.30365
440.1		0.24499	0.26672	0.32177
441.53		0.25042	0.25863	0.33836
442.95		0.24499	0.25441	0.31189
444.38		0.23949	0.24778	0.32388
445.8		0.25082	0.24168	0.33416
447.23		0.24978	0.25547	0.33896
448.65		0.23655	0.25059	0.32862
450.07		0.24663	0.25447	0.32734
451.5		0.26167	0.24406	0.33026
452.92		0.24711	0.25832	0.34504
454.35		0.24322	0.25253	0.33637
455.77		0.24839	0.26127	0.34049
457.2		0.26155	0.25434	0.33891
458.62		0.24455	0.2493	0.35538
460.04		0.24633	0.27026	0.32497
461.47		0.25658	0.26647	0.33821
462.89		0.25452	0.25572	0.3515
464.32		0.24897	0.26335	0.33817
465.74		0.25994	0.25969	0.34395
467.17		0.24681	0.26218	0.33819
468.59		0.249	0.25924	0.32034
470.01		0.24848	0.25695	0.34384
471.44		0.26336	0.25766	0.34121
472.86		0.24712	0.26319	0.34682
474.29		0.25387	0.26239	0.33339
475.71		0.24725	0.26587	0.33151
477.14		0.2608	0.26494	0.34381
478.56		0.25742	0.25937	0.32328
479.98		0.24633	0.2724	0.34735
481.41		0.25047	0.25662	0.34993
482.83		0.25733	0.25294	0.34843
484.26		0.25347	0.26387	0.351
485.68		0.25282	0.25649	0.34466
487.11		0.24965	0.25491	0.35646
488.53		0.25385	0.26415	0.34292
489.95		0.25394	0.26425	0.34032
491.38		0.26574	0.25949	0.34113
492.8		0.25971	0.27029	0.33747
494.23		0.25973	0.26368	0.35322
495.65		0.24774	0.26417	0.3465
497.08		0.25384	0.25974	0.33951
498.5		0.26576	0.27105	0.34935
499.92		0.25427	0.26754	0.34807
501.35		0.25969	0.26921	0.33989
502.77		0.26491	0.25968	0.32658
504.2		0.25667	0.27224	0.35554
505.62		0.25346	0.2776	0.33958
507.05		0.25322	0.26973	0.33939
508.47		0.25652	0.25977	0.36244
509.89		0.2538	0.2618	0.34164
511.32		0.25618	0.26146	0.34101
512.74		0.25292	0.27266	0.34353
514.17		0.26225	0.26269	0.35834
515.59		0.25842	0.26051	0.35658
517.02		0.26073	0.2675	0.35137
518.44		0.25991	0.26136	0.35228
519.86		0.25616	0.27482	0.35412
521.29		0.2629	0.26885	0.37171
522.71		0.25386	0.28145	0.36347
524.14		0.25432	0.27475	0.36351
525.56		0.25738	0.27293	0.35661
526.99		0.26114	0.26708	0.35777
528.41		0.25587	0.2606	0.37098
529.83		0.26362	0.26893	0.37294
531.26		0.26866	0.28719	0.36448
532.68		0.26803	0.26931	0.35933
534.11		0.25706	0.26857	0.34189
535.53		0.26074	0.27367	0.34493
536.96		0.25908	0.27744	0.36895
538.38		0.26011	0.26824	0.35066
539.8		0.25907	0.28162	0.34704
541.23		0.26543	0.26133	0.36128
542.65		0.26154	0.27034	0.34709
544.08		0.25654	0.26067	0.37024
545.5		0.26271	0.28038	0.35882
546.93		0.27535	0.27879	0.37291
548.35		0.26018	0.26755	0.36993
549.77		0.25685	0.28977	0.37569
551.2		0.26619	0.27582	0.36253
552.62		0.26896	0.27075	0.39057
554.05		0.27171	0.27323	0.36143
555.47		0.27301	0.28025	0.36948
556.9		0.27705	0.26653	0.37311
558.32		0.26481	0.27235	0.37132
559.74		0.26571	0.28315	0.37041
561.17		0.25451	0.27545	0.36135
562.59		0.26809	0.27776	0.36767
564.02		0.27161	0.28555	0.3481
565.44		0.26879	0.28231	0.35866
566.87		0.26524	0.28127	0.36941
568.29		0.25724	0.27429	0.38011
569.71		0.26204	0.28369	0.36092
571.14		0.25596	0.2767	0.38198
572.56		0.26219	0.27093	0.36356
573.99		0.27595	0.26527	0.37518
575.41		0.26563	0.2708	0.36435
576.84		0.26337	0.28299	0.38081
578.26		0.26501	0.28634	0.38513
579.68		0.27524	0.28419	0.37423
581.11		0.27114	0.28281	0.3716
582.53		0.26483	0.28137	0.3802
583.96		0.26565	0.27995	0.38297
585.38		0.2688	0.27312	0.37473
586.81		0.26011	0.2751	0.37743
588.23		0.26834	0.27853	0.37637
589.65		0.26805	0.2801	0.37001
591.08		0.2735	0.28295	0.37564
592.5		0.27076	0.27997	0.36467
593.93		0.27884	0.28624	0.37918
595.35		0.27698	0.28707	0.38601
596.78		0.26517	0.28721	0.3973
598.2		0.26597	0.28734	0.36934
599.62		0.26591	0.2923	0.37966
601.05		0.26995	0.27711	0.38288
602.47		0.28241	0.27641	0.36577
603.9		0.26456	0.28082	0.38988
605.32		0.27571	0.28954	0.37135
606.75		0.2709	0.27406	0.37668
608.17		0.26587	0.28222	0.38789
609.59		0.26821	0.28252	0.37596
611.02		0.28105	0.28378	0.3593
612.44		0.27775	0.28505	0.39922
613.87		0.27652	0.29173	0.37705
615.29		0.27586	0.28263	0.38681
616.72		0.28022	0.27709	0.40035
618.14		0.28745	0.27589	0.38608
619.56		0.28003	0.27044	0.37098
620.99		0.27828	0.28152	0.37912
622.41		0.26692	0.29089	0.40385
623.84		0.2772	0.30288	0.39016
625.26		0.27387	0.27166	0.40309
626.69		0.27064	0.28589	0.38716
628.11		0.27099	0.28309	0.40295
629.53		0.27958	0.28426	0.3786
630.96		0.2823	0.29423	0.37374
632.38		0.27762	0.27857	0.38898
633.81		0.27623	0.28212	0.38445
635.23		0.2816	0.27828	0.38182
636.66		0.27598	0.28249	0.40961
638.08		0.27974	0.28602	0.39349
639.5		0.2807	0.28482	0.40294
640.93		0.27502	0.29358	0.38601
642.35		0.278	0.28354	0.38308
643.78		0.28317	0.28735	0.39789
645.2		0.28494	0.28867	0.39482
646.63		0.27773	0.29002	0.38497
648.05		0.28475	0.29141	0.3792
649.47		0.27844	0.30045	0.41223
650.9		0.28892	0.28914	0.41072
652.32		0.28713	0.28443	0.38877
653.75		0.28792	0.29774	0.40316
655.17		0.28783	0.2876	0.40352
656.6		0.28702	0.29006	0.38847
658.02		0.27427	0.29339	0.40156
659.44		0.27858	0.29615	0.38965
660.87		0.27502	0.28446	0.3898
662.29		0.28478	0.29876	0.40827
663.72		0.27781	0.28486	0.41123
665.14		0.28461	0.28767	0.39239
666.57		0.28202	0.28999	0.39733
667.99		0.28776	0.30439	0.39488
669.41		0.27876	0.28567	0.38427
670.84		0.28859	0.28494	0.40666
672.26		0.27682	0.28047	0.39635
673.69		0.27364	0.28883	0.39509
675.11		0.28716	0.30071	0.38473
676.54		0.28563	0.30347	0.38969
677.96		0.28232	0.28419	0.41195
679.38		0.29502	0.29401	0.39745
680.81		0.2877	0.28557	0.39659
682.23		0.27357	0.30156	0.39632
683.66		0.28166	0.29069	0.41266
685.08		0.29806	0.30352	0.40702
686.51		0.27793	0.2994	0.40007
687.93		0.29264	0.30141	0.4197
689.35		0.27972	0.29426	0.41271
690.78		0.28159	0.29408	0.4029
692.2		0.28612	0.3026	0.40206
693.63		0.28691	0.29123	0.41979
695.05		0.2828	0.29531	0.39523
696.48		0.29485	0.29527	0.39351
697.9		0.28163	0.30333	0.39322
699.32		0.27878	0.30077	0.41733
700.75		0.28451	0.29952	0.39895
702.17		0.28823	0.30039	0.40534
703.6		0.29638	0.29016	0.41047
705.02		0.29871	0.29212	0.39434
706.45		0.28454	0.30623	0.41661
707.87		0.28476	0.3047	0.42476
709.29		0.27486	0.30021	0.40584
710.72		0.28912	0.29213	0.39865
712.14		0.30045	0.29586	0.40721
713.57		0.29416	0.30011	0.40323
714.99		0.2887	0.29513	0.41201
716.42		0.29373	0.30169	0.40461
717.84		0.29155	0.30118	0.40495
719.26		0.28568	0.30323	0.40169
720.69		0.28466	0.28512	0.42393
722.11		0.29084	0.31366	0.40808
723.54		0.29569	0.30075	0.39884
724.96		0.28975	0.31274	0.41163
726.39		0.29374	0.28439	0.42344
727.81		0.28972	0.30529	0.41424
729.23		0.30412	0.29849	0.42715
730.66		0.29725	0.30228	0.40891
732.08		0.28667	0.29867	0.41796
733.51		0.29969	0.30904	0.41619
734.93		0.28916	0.31086	0.42302
736.36		0.29003	0.30615	0.42031
737.78		0.2896	0.29571	0.42545
739.2		0.2905	0.3062	0.40884
740.63		0.30892	0.29453	0.42438
742.05		0.29933	0.30425	0.42721
743.48		0.29204	0.29904	0.41326
744.9		0.29528	0.29062	0.41535
746.33		0.28715	0.29011	0.40813
747.75		0.29446	0.29622	0.41601
749.17		0.29665	0.30257	0.43337
750.6		0.29743	0.28875	0.42779
752.02		0.30597	0.30681	0.4174
753.45		0.30208	0.30457	0.41326
754.87		0.29788	0.29064	0.42359
756.3		0.30298	0.29966	0.42717
757.72		0.3	0.30509	0.41021
759.14		0.29386	0.29704	0.42347
760.57		0.30253	0.30602	0.42336
761.99		0.30318	0.30567	0.40414
763.42		0.29375	0.2895	0.45145
764.84		0.29516	0.29796	0.4042
766.27		0.29958	0.30289	0.41393
767.69		0.29228	0.2985	0.43194
769.11		0.29928	0.30313	0.42697
770.54		0.30056	0.31105	0.43347
771.96		0.28388	0.31117	0.44366
773.39		0.30087	0.30657	0.43499
774.81		0.29777	0.30927	0.42783
776.24		0.29021	0.3027	0.43631
777.66		0.29237	0.31618	0.40758
779.08		0.3039	0.32078	0.41038
780.51		0.30152	0.32139	0.41733
781.93		0.29708	0.30827	0.41596
783.36		0.29493	0.31371	0.4185
784.78		0.30956	0.30425	0.43245
786.21		0.30101	0.30197	0.42698
787.63		0.30089	0.29994	0.43268
789.05		0.30553	0.30399	0.43582
790.48		0.30518	0.31801	0.41761
791.9		0.31196	0.31363	0.42242
793.33		0.30515	0.31015	0.42508
794.75		0.29649	0.30726	0.40813
796.18		0.30802	0.31955	0.42952
797.6		0.3114	0.32004	0.44987
799.02		0.28657	0.30729	0.42368
800.45		0.30498	0.31154	0.45887
801.87		0.30416	0.3117	0.40956
803.3		0.30903	0.31083	0.43982
804.72		0.30252	0.30526	0.44089
806.15		0.30574	0.31197	0.42818
807.57		0.31451	0.31086	0.43251
808.99		0.30613	0.31926	0.42328
810.42		0.30254	0.31487	0.44111
811.84		0.30102	0.30477	0.43736
813.27		0.30118	0.31034	0.43953
814.69		0.30716	0.30649	0.44638
816.12		0.30743	0.31351	0.43951
817.54		0.30494	0.31006	0.43836
818.96		0.30598	0.32137	0.43309
820.39		0.31558	0.31488	0.4478
821.81		0.30283	0.309	0.4466
823.24		0.30907	0.30914	0.45744
824.66		0.30763	0.31393	0.43019
826.09		0.31344	0.30457	0.43226
827.51		0.30766	0.32025	0.42281
828.93		0.31046	0.32519	0.43868
830.36		0.30681	0.32159	0.41858
831.78		0.31308	0.31498	0.45149
833.21		0.30282	0.31521	0.43659
834.63		0.31101	0.32048	0.43762
836.06		0.30162	0.31184	0.45961
837.48		0.30226	0.31147	0.43792
838.9		0.31316	0.31311	0.43658
840.33		0.31385	0.31399	0.42976
841.75		0.31227	0.32699	0.44404
843.18		0.30094	0.31398	0.43752
844.6		0.30506	0.32803	0.4661
846.03		0.31101	0.30896	0.44172
847.45		0.30364	0.31656	0.41323
848.87		0.30046	0.31751	0.44068
850.3		0.3108	0.30113	0.43812
851.72		0.30315	0.3327	0.42147
853.15		0.30869	0.31655	0.45745
854.57		0.30783	0.32732	0.44952
856		0.30987	0.32348	0.4546
857.42		0.30985	0.32368	0.44036
858.84		0.31957	0.32136	0.43706
860.27		0.30628	0.3254	0.44021
861.69		0.30628	0.32376	0.41453
863.12		0.32249	0.32188	0.44745
864.54		0.30864	0.32453	0.44934
865.97		0.31841	0.31688	0.44769
867.39		0.30732	0.30817	0.4252
868.81		0.3119	0.32552	0.44663
870.24		0.31037	0.32239	0.4458
871.66		0.31093	0.31329	0.43455
873.09		0.32131	0.3306	0.44374
874.51		0.31858	0.31919	0.43514
875.94		0.30813	0.32185	0.45044
877.36		0.3084	0.32257	0.45155
878.78		0.32129	0.31662	0.46386
880.21		0.31031	0.32104	0.46502
881.63		0.3298	0.31899	0.44767
883.06		0.31571	0.31652	0.44605
884.48		0.32039	0.31655	0.44542
885.91		0.29935	0.31854	0.42624
887.33		0.31768	0.31917	0.45218
888.75		0.31257	0.33015	0.43799
890.18		0.30705	0.33399	0.46199
891.6		0.31489	0.32202	0.46509
893.03		0.31808	0.32099	0.43956
894.45		0.31457	0.31659	0.45947
895.88		0.31304	0.32176	0.45347
897.3		0.32604	0.32165	0.4454
898.72		0.30781	0.31371	0.47103
900.15		0.31274	0.32661	0.46231
901.57		0.32433	0.30948	0.45392
903		0.31536	0.32743	0.4464
904.42		0.31371	0.31072	0.47052
905.85		0.3114	0.31567	0.44114
907.27		0.31838	0.31648	0.44879
908.69		0.31552	0.33167	0.44972
910.12		0.31474	0.32319	0.46612
911.54		0.32201	0.32562	0.44616
912.97		0.32354	0.32237	0.45995
914.39		0.32036	0.3312	0.45107
915.82		0.31484	0.32426	0.43832
917.24		0.31705	0.3204	0.44461
918.66		0.32325	0.31595	0.45574
920.09		0.31407	0.33047	0.45497
921.51		0.32134	0.32	0.43714
922.94		0.32178	0.32393	0.45525
924.36		0.3318	0.32617	0.4452
925.79		0.32087	0.32799	0.44353
927.21		0.31912	0.34014	0.44962
928.63		0.32168	0.32773	0.45757
930.06		0.33397	0.3139	0.46586
931.48		0.32676	0.32213	0.45571
932.91		0.31911	0.31331	0.44909
934.33		0.32157	0.32144	0.46774
935.76		0.32919	0.31688	0.46042
937.18		0.32405	0.33007	0.45654
938.6		0.31244	0.32066	0.44522
940.03		0.31251	0.33483	0.45462
941.45		0.32087	0.32254	0.46152
942.88		0.30607	0.32535	0.45995
944.3		0.3244	0.3216	0.47087
945.73		0.32168	0.33038	0.47375
947.15		0.31353	0.33695	0.45831
948.57		0.32279	0.32209	0.45572
950		0.31745	0.33217	0.4619
951.42		0.32078	0.32998	0.4597
952.85		0.32648	0.31625	0.45453
954.27		0.33056	0.32678	0.46826
955.7		0.32411	0.33358	0.46155
957.12		0.32878	0.32988	0.4487
958.54		0.31675	0.32734	0.4702
959.97		0.33087	0.32272	0.46287
961.39		0.31993	0.34516	0.47109
962.82		0.31895	0.33508	0.44974
964.24		0.32155	0.33034	0.48741
965.67		0.3204	0.32137	0.47202
967.09		0.3342	0.33434	0.48723
968.51		0.32739	0.32333	0.4847
969.94		0.32007	0.33394	0.46461
971.36		0.3203	0.33486	0.47518
972.79		0.32831	0.33294	0.47191
974.21		0.32664	0.33322	0.48131
975.64		0.32943	0.33428	0.46854
977.06		0.32188	0.33024	0.47473
978.48		0.31657	0.32756	0.45718
979.91		0.32327	0.32101	0.46788
981.33		0.32381	0.32199	0.46457
982.76		0.3307	0.33412	0.47133
984.18		0.32284	0.33293	0.46792
985.61		0.32953	0.33744	0.48141
987.03		0.33585	0.33716	0.4617
988.45		0.33522	0.3394	0.45501
989.88		0.31991	0.33757	0.46799
991.3		0.32985	0.33591	0.46013
992.73		0.32815	0.32336	0.4685
994.15		0.331	0.33344	0.47521
995.58		0.32835	0.3293	0.46747
997		0.33378	0.32817	0.48048
998.42		0.32767	0.32445	0.4693
999.85		0.3267	0.33795	0.48672
1001.3		0.32732	0.33721	0.4816
1002.7		0.3293	0.33943	0.46134
1004.1		0.33504	0.34768	0.47482
1005.5		0.3388	0.33226	0.47124
1007		0.3299	0.32743	0.48763
1008.4		0.33236	0.33545	0.48965
1009.8		0.32128	0.34198	0.46816
1011.2		0.33786	0.33665	0.48114
1012.7		0.33189	0.34095	0.4755
1014.1		0.32788	0.31983	0.48808
1015.5		0.33501	0.3412	0.46734
1016.9		0.33875	0.34477	0.48783
1018.4		0.3355	0.32924	0.5041
1019.8		0.33686	0.35087	0.47152
1021.2		0.33306	0.34106	0.46556
1022.6		0.32917	0.32199	0.48679
1024.1		0.33596	0.32532	0.46525
1025.5		0.34205	0.33461	0.47288
1026.9		0.33518	0.34611	0.48798
1028.3		0.33097	0.34217	0.48771
1029.8		0.34113	0.32377	0.47384
1031.2		0.32346	0.34715	0.45615
1032.6		0.32815	0.3424	0.51455
1034		0.33825	0.33942	0.49828
1035.5		0.34033	0.34581	0.48178
1036.9		0.3454	0.34283	0.46933
1038.3		0.32724	0.33125	0.46212
1039.7		0.32985	0.34544	0.4782
1041.2		0.32107	0.34291	0.47385
1042.6		0.32643	0.33415	0.46012
1044		0.33303	0.35368	0.49325
1045.4		0.34682	0.34087	0.48471
1046.8		0.33227	0.34017	0.47317
1048.3		0.32101	0.35047	0.49514
1049.7		0.32775	0.34658	0.46472
1051.1		0.32939	0.34385	0.48254
1052.5		0.33719	0.34801	0.4952
1054		0.33485	0.33715	0.4733
1055.4		0.32909	0.34521	0.50136
1056.8		0.3433	0.34101	0.47785
1058.2		0.33362	0.32347	0.48214
1059.7		0.33485	0.33051	0.50962
1061.1		0.33566	0.3408	0.46311
1062.5		0.32683	0.34482	0.49943
1063.9		0.33748	0.32901	0.46513
1065.4		0.33296	0.34695	0.50408
1066.8		0.32762	0.34006	0.47901
1068.2		0.3315	0.34617	0.4867
1069.6		0.33983	0.33813	0.47437
1071.1		0.3445	0.33905	0.4935
1072.5		0.33149	0.34628	0.47394
1073.9		0.33949	0.35015	0.49094
1075.3		0.33704	0.34495	0.49387
1076.8		0.33237	0.34535	0.50131
1078.2		0.34209	0.3378	0.48279
1079.6		0.33547	0.33477	0.48988
1081		0.34322	0.33418	0.49456
1082.5		0.34109	0.34557	0.49567
1083.9		0.32889	0.34564	0.49243
1085.3		0.34412	0.35015	0.48239
1086.7		0.33825	0.35123	0.48711
1088.2		0.32956	0.34315	0.48897
1089.6		0.34863	0.3465	0.48815
1091		0.34206	0.33839	0.4864
1092.4		0.33907	0.34089	0.46495
1093.9		0.33718	0.35177	0.48811
1095.3		0.34385	0.35743	0.49159
1096.7		0.34633	0.34325	0.48884
1098.1		0.34163	0.34324	0.52361
1099.5		0.34265	0.35569	0.47502
1101		0.33483	0.35113	0.49532
1102.4		0.34302	0.35528	0.48304
1103.8		0.34499	0.34782	0.49196
1105.2		0.33933	0.34286	0.49005
1106.7		0.33619	0.35204	0.51192
1108.1		0.34171	0.35045	0.49714
1109.5		0.35113	0.35828	0.49442
1110.9		0.34234	0.35349	0.5137
1112.4		0.35015	0.35661	0.48914
1113.8		0.33986	0.34709	0.4871
1115.2		0.34776	0.36617	0.4844
1116.6		0.35922	0.33774	0.50887
1118.1		0.34395	0.34347	0.50249
1119.5		0.34355	0.35326	0.50455
1120.9		0.35207	0.33496	0.49657
1122.3		0.34695	0.35349	0.51458
1123.8		0.34337	0.34537	0.49044
1125.2		0.33746	0.34671	0.50535
1126.6		0.34828	0.34771	0.52289
1128		0.35133	0.35196	0.50749
1129.5		0.34344	0.33409	0.50362
1130.9		0.35445	0.36309	0.50877
1132.3		0.35795	0.34038	0.49839
1133.7		0.35285	0.3622	0.51376
1135.2		0.35003	0.35395	0.49589
1136.6		0.34116	0.35064	0.48083
1138		0.34174	0.36319	0.50846
1139.4		0.34708	0.35587	0.51361
1140.9		0.34993	0.34873	0.50868
1142.3		0.34784	0.34613	0.5076
1143.7		0.33284	0.35351	0.49619
1145.1		0.3576	0.34539	0.51035
1146.5		0.35366	0.33633	0.50861
1148		0.34626	0.3506	0.49798
1149.4		0.35224	0.36278	0.50812
1150.8		0.3425	0.34996	0.499
1152.2		0.34143	0.35651	0.51052
1153.7		0.35974	0.35897	0.49058
1155.1		0.35228	0.33743	0.51084
1156.5		0.34916	0.34974	0.52217
1157.9		0.35643	0.34373	0.4915
1159.4		0.34342	0.35473	0.48791
1160.8		0.35382	0.35467	0.50932
1162.2		0.34566	0.35127	0.50512
1163.6		0.34297	0.35258	0.50744
1165.1		0.34622	0.37458	0.48784
1166.5		0.34433	0.34926	0.51281
1167.9		0.35568	0.33907	0.49759
1169.3		0.34949	0.36138	0.49627
1170.8		0.35079	0.37167	0.50774
1172.2		0.34303	0.3438	0.49731
1173.6		0.35358	0.35687	0.51789
1175		0.36127	0.35568	0.5209
1176.5		0.34774	0.34712	0.51547
1177.9		0.35426	0.36057	0.52549
1179.3		0.34936	0.36637	0.49466
1180.7		0.35511	0.37115	0.49503
1182.2		0.36377	0.35063	0.50214
1183.6		0.34994	0.3531	0.51637
1185		0.35256	0.35499	0.50769
1186.4		0.3384	0.35399	0.51829
1187.9		0.35492	0.36846	0.4846
1189.3		0.3591	0.34573	0.50292
1190.7		0.33895	0.35639	0.53131
1192.1		0.34883	0.35856	0.49504
1193.6		0.3527	0.37092	0.4956
1195		0.35382	0.35338	0.51449
1196.4		0.35542	0.36923	0.50411
1197.8		0.35822	0.34459	0.50213
1199.2		0.3504	0.36035	0.49065
1200.7		0.34776	0.36458	0.50613
1202.1		0.36386	0.34802	0.52105
1203.5		0.34597	0.35748	0.51056
1204.9		0.34876	0.37391	0.52279
1206.4		0.34484	0.36288	0.51617
1207.8		0.3694	0.34398	0.49368
1209.2		0.34595	0.35846	0.50048
1210.6		0.3555	0.35434	0.51416
1212.1		0.35244	0.3645	0.49801
1213.5		0.34831	0.34682	0.5177
1214.9		0.36551	0.35394	0.52092
1216.3		0.36	0.35695	0.53659
1217.8		0.34612	0.35474	0.51893
1219.2		0.35973	0.34447	0.51849
1220.6		0.36149	0.35372	0.51028
1222		0.3515	0.36009	0.5034
1223.5		0.34955	0.36257	0.54531
1224.9		0.3581	0.36431	0.51122
1226.3		0.35948	0.37066	0.52152
1227.7		0.35913	0.35919	0.48355
1229.2		0.35554	0.37976	0.5255
1230.6		0.35249	0.36885	0.50424
1232		0.35738	0.36311	0.50533
1233.4		0.35712	0.36843	0.52654
1234.9		0.36375	0.35636	0.50705
1236.3		0.37022	0.36982	0.5081
1237.7		0.3641	0.37035	0.51263
1239.1		0.35495	0.35577	0.48695
1240.6		0.358	0.37089	0.51806
1242		0.36271	0.36594	0.53912
1243.4		0.35513	0.35452	0.50357
1244.8		0.36278	0.3619	0.52725
1246.2		0.36737	0.35991	0.53653
1247.7		0.35533	0.36873	0.52155
1249.1		0.36268	0.36217	0.49672
1250.5		0.35183	0.36229	0.52297
1251.9		0.35852	0.36595	0.51086
1253.4		0.3572	0.36607	0.52608
1254.8		0.36506	0.36155	0.53385
1256.2		0.35917	0.36971	0.52089
1257.6		0.35839	0.35878	0.52366
1259.1		0.35718	0.35974	0.503
1260.5		0.36891	0.34039	0.51193
1261.9		0.36212	0.36755	0.53627
1263.3		0.34848	0.36063	0.5052
1264.8		0.37203	0.3503	0.54668
1266.2		0.3548	0.37423	0.51645
1267.6		0.36883	0.36768	0.52864
1269		0.35806	0.36112	0.52179
1270.5		0.36838	0.37257	0.52068
1271.9		0.36968	0.37009	0.52107
1273.3		0.37137	0.37784	0.51668
1274.7		0.36624	0.36514	0.52802
1276.2		0.35939	0.36571	0.52441
1277.6		0.36826	0.3711	0.53777
1279		0.37221	0.37106	0.52743
1280.4		0.36221	0.36714	0.51526
1281.9		0.3598	0.37751	0.52849
1283.3		0.36387	0.37932	0.53006
1284.7		0.36991	0.35562	0.5129
1286.1		0.37034	0.36602	0.51378
1287.6		0.36759	0.3646	0.52571
1289		0.369	0.36916	0.50421
1290.4		0.3618	0.36572	0.53165
1291.8		0.36778	0.35527	0.53894
1293.3		0.36533	0.36502	0.52293
1294.7		0.35361	0.36884	0.52172
1296.1		0.36645	0.36684	0.5417
1297.5		0.36166	0.38342	0.56413
1298.9		0.35356	0.37425	0.5187
1300.4		0.36931	0.36894	0.54654
1301.8		0.36852	0.35793	0.53082
1303.2		0.3645	0.36353	0.53899
1304.6		0.36304	0.35821	0.51295
1306.1		0.36604	0.36406	0.52802
1307.5		0.35983	0.37128	0.53801
1308.9		0.37682	0.37437	0.51477
1310.3		0.37381	0.37183	0.52285
1311.8		0.35513	0.36746	0.53221
1313.2		0.36508	0.36918	0.52438
1314.6		0.3688	0.35765	0.53096
1316		0.37142	0.36256	0.53806
1317.5		0.36133	0.37017	0.5418
1318.9		0.35612	0.38281	0.52027
1320.3		0.36802	0.37503	0.5342
1321.7		0.37644	0.36198	0.52812
1323.2		0.37266	0.37212	0.51957
1324.6		0.36849	0.36003	0.54092
1326		0.37286	0.35685	0.52658
1327.4		0.3685	0.3732	0.52881
1328.9		0.36865	0.37383	0.54691
1330.3		0.37654	0.3755	0.52106
1331.7		0.3733	0.36804	0.54214
1333.1		0.37376	0.38031	0.53707
1334.6		0.37248	0.36708	0.53416
1336		0.36668	0.37946	0.5199
1337.4		0.38372	0.36838	0.52702
1338.8		0.3696	0.38115	0.54009
1340.3		0.37482	0.3869	0.51988
1341.7		0.3767	0.36605	0.53966
1343.1		0.36995	0.36113	0.53532
1344.5		0.36539	0.39016	0.52312
1345.9		0.37871	0.37879	0.52445
1347.4		0.36634	0.38833	0.5343
1348.8		0.37328	0.38257	0.52913
1350.2		0.36676	0.38662	0.549
1351.6		0.37125	0.36754	0.51865
1353.1		0.36459	0.38608	0.54039
1354.5		0.37547	0.38221	0.53082
1355.9		0.369	0.3837	0.5509
1357.3		0.36958	0.37365	0.54593
1358.8		0.37648	0.37513	0.53458
1360.2		0.37723	0.37067	0.53567
1361.6		0.36278	0.3852	0.55752
1363		0.37635	0.38116	0.54936
1364.5		0.37115	0.3974	0.55569
1365.9		0.37479	0.36889	0.52377
1367.3		0.37393	0.37258	0.53114
1368.7		0.38049	0.37229	0.55256
1370.2		0.37718	0.37294	0.52194
1371.6		0.37364	0.38051	0.52055
1373		0.36853	0.36521	0.54154
1374.4		0.37204	0.37172	0.5492
1375.9		0.36706	0.37937	0.55149
1377.3		0.37298	0.38116	0.5646
1378.7		0.37442	0.3731	0.53588
1380.1		0.37431	0.38128	0.53712
1381.6		0.37583	0.38187	0.54092
1383		0.38528	0.38443	0.53409
1384.4		0.37645	0.37852	0.54627
1385.8		0.38009	0.37788	0.54147
1387.3		0.37056	0.3724	0.54052
1388.7		0.375	0.37591	0.55566
1390.1		0.37216	0.3852	0.55055
1391.5		0.38464	0.38342	0.54269
1393		0.37465	0.38748	0.55914
1394.4		0.3703	0.38728	0.55321
1395.8		0.38167	0.3611	0.55119
1397.2		0.37	0.36946	0.53833
1398.6		0.37532	0.37907	0.54988
1400.1		0.37489	0.37105	0.55485
1401.5		0.37042	0.37462	0.54443
1402.9		0.38404	0.37848	0.54742
1404.3		0.38762	0.37892	0.5818
1405.8		0.36398	0.37547	0.55211
1407.2		0.37663	0.37739	0.50892
1408.6		0.37572	0.37903	0.54896
1410		0.37773	0.37533	0.5522
1411.5		0.37974	0.40274	0.53781
1412.9		0.39104	0.37344	0.56263
1414.3		0.37393	0.40308	0.53923
1415.7		0.36624	0.38457	0.55704
1417.2		0.38396	0.39872	0.53306
1418.6		0.38696	0.3966	0.55141
1420		0.36263	0.3886	0.55112
1421.4		0.37586	0.37748	0.55586
1422.9		0.38249	0.38255	0.53875
1424.3		0.37226	0.37724	0.56007
1425.7		0.3776	0.38992	0.55005
1427.1		0.37596	0.38493	0.54643
1428.6		0.37998	0.37876	0.53217
1430		0.3737	0.38208	0.55809
1431.4		0.38116	0.38928	0.54899
1432.8		0.38986	0.37235	0.55173
1434.3		0.38528	0.37379	0.546
1435.7		0.37777	0.37213	0.54912
1437.1		0.38735	0.38143	0.56142
1438.5		0.38139	0.36869	0.53001
1440		0.38322	0.38119	0.56735
1441.4		0.38804	0.38254	0.53004
1442.8		0.37808	0.38531	0.56662
1444.2		0.38664	0.38397	0.55214
1445.6		0.37544	0.37999	0.54747
1447.1		0.38222	0.37325	0.53649
1448.5		0.38544	0.38732	0.56312
1449.9		0.37677	0.37684	0.52997
1451.3		0.38837	0.39631	0.56863
1452.8		0.38012	0.38106	0.55305
1454.2		0.37637	0.38246	0.54316
1455.6		0.3828	0.38755	0.55865
1457		0.37271	0.40033	0.54797
1458.5		0.38069	0.38334	0.55783
1459.9		0.38013	0.39239	0.55503
1461.3		0.38337	0.39023	0.57871
1462.7		0.38697	0.37506	0.55502
1464.2		0.38393	0.37702	0.5758
1465.6		0.38546	0.39238	0.55928
1467		0.38468	0.38304	0.5473
1468.4		0.37985	0.37007	0.55082
1469.9		0.38554	0.40108	0.55242
1471.3		0.39626	0.38827	0.58393
1472.7		0.37465	0.37756	0.5425
1474.1		0.38704	0.39201	0.5467
1475.6		0.38249	0.38428	0.55855
1477		0.37206	0.38368	0.55838
1478.4		0.37706	0.38279	0.56131
1479.8		0.39316	0.39526	0.53089
1481.3		0.39006	0.38808	0.5449
1482.7		0.38463	0.40483	0.55692
1484.1		0.3794	0.397	0.53431
1485.5		0.38423	0.3733	0.56559
1487		0.39339	0.3974	0.57083
1488.4		0.38459	0.37676	0.56214
1489.8		0.37928	0.38701	0.55742
1491.2		0.39133	0.39001	0.54658
1492.7		0.3832	0.37542	0.56679
1494.1		0.36988	0.39635	0.5453
1495.5		0.38611	0.37687	0.56417
1496.9		0.37936	0.36511	0.55903
1498.3		0.38794	0.39735	0.54758
1499.8		0.38061	0.39108	0.54668
1501.2		0.38495	0.39508	0.54949
1502.6		0.38319	0.39788	0.55167
1504		0.39164	0.38167	0.56167
1505.5		0.39385	0.40331	0.55903
1506.9		0.39253	0.38699	0.55411
1508.3		0.3885	0.3948	0.55263
1509.7		0.3896	0.38796	0.56
1511.2		0.38271	0.38328	0.56947
1512.6		0.3816	0.40827	0.54639
1514		0.38796	0.3963	0.56887
1515.4		0.38304	0.39437	0.56241
1516.9		0.40309	0.40071	0.57168
1518.3		0.39359	0.38032	0.55047
1519.7		0.38296	0.39941	0.56655
1521.1		0.38694	0.38147	0.54244
1522.6		0.38875	0.38966	0.56197
1524		0.38558	0.40028	0.54941
1525.4		0.38814	0.38481	0.56127
1526.8		0.38771	0.39167	0.57816
1528.3		0.40006	0.39853	0.55564
1529.7		0.38431	0.38265	0.5664
1531.1		0.39931	0.39436	0.56623
1532.5		0.39095	0.38858	0.5564
1534		0.3959	0.39148	0.59216
1535.4		0.38818	0.39749	0.58848
1536.8		0.39223	0.38673	0.55715
1538.2		0.38594	0.39824	0.55882
1539.7		0.39055	0.37879	0.59075
1541.1		0.39128	0.39369	0.57238
1542.5		0.38418	0.39565	0.55251
1543.9		0.39119	0.40167	0.5792
1545.3		0.37486	0.38601	0.55325
1546.8		0.3941	0.37494	0.57936
1548.2		0.39992	0.37677	0.56068
1549.6		0.39263	0.40141	0.56756
1551		0.38743	0.41531	0.54453
1552.5		0.39173	0.4105	0.56642
1553.9		0.38917	0.38757	0.57276
1555.3		0.38893	0.39029	0.57322
1556.7		0.39714	0.39108	0.55717
1558.2		0.38717	0.4	0.55527
1559.6		0.39887	0.39493	0.5649
1561		0.39238	0.39252	0.57386
1562.4		0.39722	0.3985	0.55909
1563.9		0.39338	0.39815	0.56546
1565.3		0.39265	0.38725	0.59041
1566.7		0.39408	0.39416	0.56085
1568.1		0.39404	0.39131	0.56565
1569.6		0.403	0.39198	0.56831
1571		0.4041	0.39999	0.56335
1572.4		0.40127	0.40869	0.57463
1573.8		0.39601	0.40323	0.56749
1575.3		0.40246	0.404	0.57871
1576.7		0.39641	0.402	0.54352
1578.1		0.39392	0.39255	0.55573
1579.5		0.39453	0.40398	0.57201
1581		0.39827	0.38126	0.57537
1582.4		0.39856	0.40515	0.56361
1583.8		0.39543	0.40389	0.58881
1585.2		0.40207	0.39972	0.58737
1586.7		0.39858	0.39047	0.55573
1588.1		0.39264	0.39288	0.57552
1589.5		0.39422	0.39446	0.59186
1590.9		0.39645	0.39323	0.58422
1592.4		0.39866	0.40472	0.56836
1593.8		0.39239	0.40191	0.56868
1595.2		0.39287	0.39114	0.58849
1596.6		0.39628	0.40132	0.56801
1598		0.39726	0.39858	0.57347
1599.5		0.39013	0.40566	0.57288
1600.9		0.40054	0.4116	0.58025
1602.3		0.38602	0.39267	0.59073
1603.7		0.39559	0.40747	0.55596
1605.2		0.39445	0.39802	0.56403
1606.6		0.40559	0.38179	0.5625
1608		0.40075	0.4134	0.58159
1609.4		0.39049	0.40071	0.56377
1610.9		0.41074	0.41035	0.60393
1612.3		0.39498	0.39508	0.58421
1613.7		0.38986	0.38831	0.58998
1615.1		0.40577	0.39595	0.57788
1616.6		0.40029	0.39484	0.5679
1618		0.40249	0.40766	0.58971
1619.4		0.39425	0.39145	0.59128
1620.8		0.39418	0.40551	0.57726
1622.3		0.39633	0.40048	0.57936
1623.7		0.40563	0.40045	0.58293
1625.1		0.40541	0.40325	0.58804
1626.5		0.41051	0.40313	0.55699
1628		0.39807	0.40246	0.58365
1629.4		0.39765	0.40784	0.57496
1630.8		0.40475	0.40116	0.57585
1632.2		0.40351	0.4085	0.57584
1633.7		0.40342	0.39874	0.59741
1635.1		0.39889	0.40662	0.59948
1636.5		0.40358	0.3967	0.58081
1637.9		0.40037	0.39334	0.58928
1639.4		0.39964	0.40089	0.58169
1640.8		0.38834	0.39375	0.5822
1642.2		0.40844	0.40562	0.57439
1643.6		0.39827	0.40607	0.57938
1645		0.40827	0.40147	0.59225
1646.5		0.39662	0.41557	0.58716
1647.9		0.40437	0.41855	0.57808
1649.3		0.39703	0.40991	0.59266
1650.7		0.39593	0.40433	0.55317
1652.2		0.40297	0.41759	0.57153
1653.6		0.39726	0.42514	0.59862
1655		0.40824	0.40322	0.58181
1656.4		0.41157	0.40816	0.55854
1657.9		0.40662	0.39765	0.55539
1659.3		0.40213	0.41431	0.59636
1660.7		0.41682	0.40623	0.57648
1662.1		0.41428	0.39657	0.58736
1663.6		0.40238	0.40883	0.56318
1665		0.40601	0.40153	0.58804
1666.4		0.40693	0.41603	0.56888
1667.8		0.4059	0.42182	0.56375
1669.3		0.40737	0.41064	0.5957
1670.7		0.39622	0.39909	0.59653
1672.1		0.41089	0.41522	0.56259
1673.5		0.41121	0.39945	0.58785
1675		0.391	0.41281	0.58141
1676.4		0.39382	0.41048	0.60217
1677.8		0.41197	0.39772	0.57851
1679.2		0.39974	0.41883	0.57348
1680.7		0.41099	0.41125	0.60814
1682.1		0.41558	0.41507	0.5978
1683.5		0.41473	0.4085	0.5976
1684.9		0.41238	0.40597	0.57458
1686.4		0.39935	0.42504	0.5952
1687.8		0.40433	0.41794	0.60353
1689.2		0.39581	0.42068	0.58698
1690.6		0.41227	0.40099	0.59746
1692.1		0.40083	0.40838	0.58749
1693.5		0.40367	0.40956	0.58373
1694.9		0.40444	0.39549	0.58711
1696.3		0.39299	0.41367	0.57333
1697.7		0.42158	0.41094	0.5623
1699.2		0.40203	0.40868	0.59181
1700.6		0.40227	0.39927	0.57165
1702		0.41215	0.40387	0.60739
1703.4		0.39133	0.40129	0.57349
1704.9		0.40843	0.41021	0.60224
1706.3		0.40132	0.41026	0.58577
1707.7		0.41188	0.42672	0.59685
1709.1		0.41507	0.41	0.5993
1710.6		0.40298	0.41167	0.58373
1712		0.41507	0.40193	0.58747
1713.4		0.40313	0.42409	0.57088
1714.8		0.40974	0.41756	0.60952
1716.3		0.41535	0.41222	0.57747
1717.7		0.40315	0.41843	0.58758
1719.1		0.41243	0.40567	0.60843
1720.5		0.39842	0.39892	0.59154
1722		0.39998	0.41559	0.57821
1723.4		0.41284	0.41154	0.57678
1724.8		0.40248	0.41988	0.58241
1726.2		0.41513	0.42952	0.57341
1727.7		0.40419	0.41504	0.62286
1729.1		0.40562	0.40982	0.60489
1730.5		0.40198	0.42114	0.5773
1731.9		0.41113	0.39785	0.59311
1733.4		0.4101	0.41965	0.58804
1734.8		0.40825	0.41625	0.59733
1736.2		0.39909	0.41257	0.60719
1737.6		0.41114	0.41989	0.59724
1739.1		0.41914	0.42271	0.61104
1740.5		0.41641	0.4144	0.59836
1741.9		0.41922	0.42757	0.60231
1743.3		0.40472	0.41211	0.58766
1744.7		0.42625	0.41233	0.59287
1746.2		0.3986	0.41141	0.60032
1747.6		0.42043	0.41076	0.58963
1749		0.40257	0.41982	0.60371
1750.4		0.4144	0.42969	0.62401
1751.9		0.41945	0.41926	0.58561
1753.3		0.42004	0.41124	0.58153
1754.7		0.42057	0.40805	0.58902
1756.1		0.41825	0.42769	0.58921
1757.6		0.40765	0.41211	0.6188
1759		0.41206	0.41351	0.59529
1760.4		0.42308	0.41732	0.60041
1761.8		0.41614	0.42298	0.592
1763.3		0.41563	0.42607	0.58573
1764.7		0.41282	0.4212	0.5738
1766.1		0.41884	0.39427	0.59437
1767.5		0.4171	0.40734	0.57726
1769		0.41346	0.40721	0.58751
1770.4		0.42137	0.42595	0.60184
1771.8		0.41172	0.41982	0.61542
1773.2		0.40448	0.41568	0.5801
1774.7		0.41757	0.41746	0.60321
1776.1		0.41478	0.3974	0.59422
1777.5		0.4181	0.41468	0.58775
1778.9		0.40961	0.42557	0.6058
1780.4		0.41972	0.40791	0.58825
1781.8		0.41917	0.424	0.60091
1783.2		0.42046	0.42242	0.6061
1784.6		0.4167	0.41591	0.60669
1786.1		0.41016	0.41695	0.57697
1787.5		0.42206	0.43032	0.58525
1788.9		0.41337	0.42142	0.60361
1790.3		0.42805	0.41979	0.59493
1791.8		0.41453	0.4183	0.60119
1793.2		0.41901	0.4144	0.59161
1794.6		0.42182	0.42594	0.60744
1796		0.4152	0.42122	0.61723
1797.4		0.41933	0.4222	0.60134
1798.9		0.41487	0.41811	0.59708
1800.3		0.41944	0.41175	0.59399
1801.7		0.40924	0.41956	0.61587
1803.1		0.4212	0.4299	0.60602
1804.6		0.41862	0.42482	0.61304
1806		0.41145	0.42911	0.59625
1807.4		0.42742	0.4109	0.60944
1808.8		0.41572	0.42021	0.5833
1810.3		0.42054	0.4129	0.61566
1811.7		0.41262	0.42982	0.61542
1813.1		0.40543	0.43162	0.59909
1814.5		0.4233	0.4262	0.60031
1816		0.41402	0.42406	0.58528
1817.4		0.42163	0.41832	0.60629
1818.8		0.41794	0.42045	0.58781
1820.2		0.422	0.42943	0.62021
1821.7		0.41122	0.40728	0.59785
1823.1		0.42826	0.41441	0.61077
1824.5		0.42784	0.42856	0.61711
1825.9		0.42425	0.42008	0.6002
1827.4		0.42837	0.41471	0.62663
1828.8		0.41412	0.42138	0.6186
1830.2		0.41616	0.42436	0.59995
1831.6		0.41597	0.41864	0.61074
1833.1		0.42387	0.41364	0.59374
1834.5		0.42703	0.4313	0.63029
1835.9		0.41766	0.41696	0.59572
1837.3		0.4101	0.41338	0.60453
1838.8		0.42872	0.42735	0.59391
1840.2		0.4269	0.42432	0.59327
1841.6		0.41784	0.4297	0.59223
1843		0.42064	0.42473	0.60478
1844.4		0.42262	0.4276	0.63531
1845.9		0.42163	0.42498	0.60623
1847.3		0.42393	0.42645	0.60934
1848.7		0.42602	0.41107	0.60357
1850.1		0.41951	0.42479	0.59128
1851.6		0.41974	0.42751	0.59858
1853		0.42631	0.43396	0.60609
1854.4		0.42396	0.42788	0.59783
1855.8		0.42555	0.41949	0.59907
1857.3		0.41919	0.43277	0.61599
1858.7		0.42476	0.42357	0.61191
1860.1		0.42279	0.41647	0.61926
1861.5		0.42083	0.42145	0.59679
1863		0.41391	0.42938	0.5859
1864.4		0.41224	0.42957	0.59556
1865.8		0.41887	0.42261	0.63884
1867.2		0.42365	0.42625	0.60078
1868.7		0.42509	0.43227	0.6083
1870.1		0.42987	0.42291	0.60015
1871.5		0.43725	0.41617	0.6182
1872.9		0.4283	0.41831	0.61525
1874.4		0.43681	0.41927	0.61658
1875.8		0.42207	0.42226	0.59122
1877.2		0.42031	0.42005	0.63043
1878.6		0.43176	0.44311	0.6163
1880.1		0.43133	0.41576	0.6004
1881.5		0.42047	0.42866	0.60624
1882.9		0.42125	0.42185	0.62699
1884.3		0.42969	0.42317	0.63924
1885.8		0.43114	0.43877	0.63601
1887.2		0.43592	0.42465	0.62655
1888.6		0.44037	0.42623	0.62833
1890		0.4264	0.43215	0.61338
1891.5		0.41697	0.43817	0.61806
1892.9		0.42403	0.43265	0.61782
1894.3		0.41859	0.41867	0.61241
1895.7		0.42432	0.43383	0.59977
1897.1		0.41617	0.42277	0.60063
1898.6		0.41874	0.41559	0.59849
1900		0.42899	0.43214	0.59948
1901.4		0.42018	0.43534	0.64094
1902.8		0.43712	0.42475	0.62386
1904.3		0.43571	0.43269	0.61829
1905.7		0.43651	0.42693	0.61177
1907.1		0.41969	0.43661	0.61661
1908.5		0.428	0.43158	0.62641
1910		0.43158	0.4247	0.60867
1911.4		0.41581	0.44091	0.60257
1912.8		0.41674	0.43057	0.6159
1914.2		0.43939	0.42317	0.63678
1915.7		0.43241	0.43297	0.60315
1917.1		0.43449	0.43792	0.61323
1918.5		0.42024	0.42481	0.62506
1919.9		0.42654	0.4524	0.61369
1921.4		0.43385	0.4226	0.61029
1922.8		0.42984	0.42409	0.60807
1924.2		0.41936	0.42614	0.60958
1925.6		0.42762	0.43989	0.60144
1927.1		0.43706	0.45065	0.61195
1928.5		0.42633	0.4263	0.61369
1929.9		0.43063	0.41762	0.61027
1931.3		0.43375	0.42643	0.62354
1932.8		0.41969	0.42701	0.61486
1934.2		0.42517	0.44575	0.63141
1935.6		0.42871	0.43331	0.61003
1937		0.42016	0.42953	0.61454
1938.5		0.42358	0.43516	0.60449
1939.9		0.42751	0.42667	0.61493
1941.3		0.4332	0.43015	0.60715
1942.7		0.42751	0.4346	0.61846
1944.1		0.41966	0.42392	0.61458
1945.6		0.42571	0.44376	0.61823
1947		0.43377	0.43828	0.61976
1948.4		0.42043	0.43259	0.62339
1949.8		0.43066	0.42072	0.63139
1951.3		0.4368	0.42513	0.62801
1952.7		0.43273	0.41528	0.6087
1954.1		0.44133	0.4186	0.61319
1955.5		0.42276	0.43477	0.59767
1957		0.43331	0.43558	0.61268
1958.4		0.43088	0.44875	0.61858
1959.8		0.43432	0.4438	0.61208
1961.2		0.43342	0.43244	0.61553
1962.7		0.42743	0.41884	0.62504
1964.1		0.43688	0.43842	0.62062
1965.5		0.43105	0.43752	0.62004
1966.9		0.42753	0.42683	0.6323
1968.4		0.42091	0.43931	0.59781
1969.8		0.43058	0.42661	0.63224
1971.2		0.42113	0.44079	0.6179
1972.6		0.43379	0.43402	0.63502
1974.1		0.43766	0.4551	0.61695
1975.5		0.43261	0.44602	0.62862
1976.9		0.43167	0.42726	0.61718
1978.3		0.43997	0.41885	0.63276
1979.8		0.42638	0.45065	0.62783
1981.2		0.43298	0.42504	0.61235
1982.6		0.44262	0.43015	0.6217
1984		0.43448	0.42586	0.62553
1985.5		0.43098	0.4425	0.64214
1986.9		0.43284	0.42418	0.62977
1988.3		0.44527	0.42282	0.63549
1989.7		0.43068	0.43402	0.61507
1991.2		0.43659	0.4284	0.62004
1992.6		0.43942	0.43311	0.60711
1994		0.43085	0.43524	0.61314
1995.4		0.4427	0.43659	0.621
1996.8		0.43419	0.43908	0.62646
1998.3		0.43772	0.43196	0.62161
1999.7		0.42073	0.43678	0.66576
2001.1		0.43611	0.43971	0.62331
2002.5		0.44113	0.43572	0.60864
2004		0.44153	0.44911	0.64825
2005.4		0.42642	0.44364	0.62069
2006.8		0.42598	0.42374	0.62845
2008.2		0.4527	0.43924	0.63127
2009.7		0.43222	0.43246	0.61724
2011.1		0.43551	0.44128	0.60801
2012.5		0.4355	0.43978	0.63522
2013.9		0.42889	0.42574	0.62255
2015.4		0.42891	0.43105	0.62971
2016.8		0.44051	0.45728	0.6156
2018.2		0.44258	0.42548	0.6199
2019.6		0.42993	0.46121	0.63769
2021.1		0.4365	0.44223	0.64191
2022.5		0.43704	0.44889	0.60381
2023.9		0.44718	0.44066	0.60767
2025.3		0.44048	0.42714	0.60413
2026.8		0.43946	0.44644	0.61401
2028.2		0.43657	0.4421	0.63609
2029.6		0.44501	0.4365	0.61864
2031		0.42885	0.45349	0.62129
2032.5		0.43699	0.44364	0.641
2033.9		0.4388	0.43027	0.64548
2035.3		0.43909	0.44192	0.60713
2036.7		0.44248	0.43579	0.62796
2038.2		0.43435	0.44106	0.64117
2039.6		0.4331	0.4464	0.63834
2041		0.43693	0.43697	0.61121
2042.4		0.44399	0.44566	0.6399
2043.8		0.44815	0.43128	0.62223
2045.3		0.44962	0.44865	0.6528
2046.7		0.43348	0.43362	0.62399
2048.1		0.43555	0.43951	0.63876
2049.5		0.43079	0.44809	0.61983
2051		0.44606	0.42751	0.64983
2052.4		0.42949	0.43885	0.62244
2053.8		0.43705	0.43633	0.6086
2055.2		0.43446	0.4471	0.63516
2056.7		0.44288	0.43561	0.65947
2058.1		0.44625	0.44544	0.62393
2059.5		0.43751	0.45485	0.63256
2060.9		0.4326	0.4464	0.61392
2062.4		0.44495	0.461	0.61928
2063.8		0.43183	0.45038	0.63752
2065.2		0.44148	0.44223	0.65078
2066.6		0.42644	0.45154	0.63435
2068.1		0.44911	0.44558	0.64777
2069.5		0.43556	0.43865	0.61516
2070.9		0.43314	0.43336	0.61176
2072.3		0.43679	0.45012	0.61701
2073.8		0.44496	0.43567	0.63414
2075.2		0.44733	0.43757	0.63726
2076.6		0.44305	0.43648	0.63632
2078		0.44317	0.43256	0.61619
2079.5		0.43019	0.44184	0.6453
2080.9		0.44731	0.44787	0.62872
2082.3		0.45625	0.43456	0.61091
2083.7		0.43391	0.44085	0.62863
2085.2		0.43406	0.45112	0.62397
2086.6		0.44525	0.43201	0.6154
2088		0.44001	0.45106	0.63416
2089.4		0.43203	0.4403	0.61914
2090.9		0.44016	0.44792	0.61241
2092.3		0.443	0.43035	0.6425
2093.7		0.43697	0.43469	0.63315
2095.1		0.43891	0.46041	0.64164
2096.5		0.45364	0.45351	0.64073
2098		0.44853	0.45177	0.63664
2099.4		0.4422	0.45353	0.6413
2100.8		0.43858	0.4235	0.63901
2102.2		0.44123	0.43897	0.62746
2103.7		0.44966	0.44605	0.61889
2105.1		0.44231	0.44518	0.62669
2106.5		0.43937	0.45225	0.6328
2107.9		0.45095	0.45177	0.63861
2109.4		0.44755	0.4532	0.63059
2110.8		0.43721	0.43801	0.60615
2112.2		0.43703	0.45107	0.64435
2113.6		0.45415	0.4444	0.64376
2115.1		0.44682	0.44578	0.62349
2116.5		0.43777	0.44197	0.64048
2117.9		0.44758	0.44495	0.64753
2119.3		0.44321	0.44644	0.63129
2120.8		0.44347	0.45542	0.62634
2122.2		0.44034	0.43324	0.62563
2123.6		0.43873	0.45783	0.6223
2125		0.44533	0.44726	0.63694
2126.5		0.44152	0.44639	0.63677
2127.9		0.44551	0.46106	0.6315
2129.3		0.4492	0.4574	0.6033
2130.7		0.45533	0.43424	0.63638
2132.2		0.44502	0.46881	0.63937
2133.6		0.4415	0.44048	0.64423
2135		0.44095	0.46015	0.63185
2136.4		0.43499	0.43449	0.63315
2137.9		0.44595	0.44882	0.63547
2139.3		0.45471	0.45225	0.64629
2140.7		0.43773	0.45985	0.65748
2142.1		0.43535	0.45008	0.63828
2143.5		0.44487	0.44654	0.63803
2145		0.45495	0.44026	0.65309
2146.4		0.45165	0.4477	0.63531
2147.8		0.45048	0.44785	0.67201
2149.2		0.43985	0.44629	0.63437
2150.7		0.44802	0.44792	0.64479
2152.1		0.45447	0.45962	0.64622
2153.5		0.45884	0.45219	0.64598
2154.9		0.44337	0.45094	0.6596
2156.4		0.45105	0.45819	0.62943
2157.8		0.44983	0.44816	0.63461
2159.2		0.44034	0.46575	0.63478
2160.6		0.43671	0.45596	0.64019
2162.1		0.44815	0.44684	0.65482
2163.5		0.45151	0.4522	0.64209
2164.9		0.43772	0.43895	0.62523
2166.3		0.44206	0.4336	0.63453
2167.8		0.4469	0.45374	0.65066
2169.2		0.45488	0.45032	0.65249
2170.6		0.45726	0.45939	0.63625
2172		0.44919	0.45008	0.63037
2173.5		0.44397	0.45061	0.62731
2174.9		0.4495	0.46643	0.62821
2176.3		0.45043	0.4536	0.65054
2177.7		0.44501	0.46098	0.65163
2179.2		0.45974	0.46003	0.65916
2180.6		0.45567	0.45189	0.63382
2182		0.4435	0.45629	0.63348
2183.4		0.43879	0.45413	0.64387
2184.9		0.45308	0.45258	0.65126
2186.3		0.45573	0.45683	0.66774
2187.7		0.45362	0.44795	0.63087
2189.1		0.44967	0.44542	0.6531
2190.6		0.4467	0.44874	0.6419
2192		0.45417	0.4449	0.62714
2193.4		0.45176	0.46767	0.65145
2194.8		0.45237	0.43945	0.66678
2196.2		0.4534	0.45938	0.66327
2197.7		0.43921	0.45651	0.65088
2199.1		0.44388	0.4412	0.63655
2200.5		0.44941	0.45193	0.65394
2201.9		0.44673	0.46041	0.64964
2203.4		0.46556	0.44821	0.64988
2204.8		0.45514	0.4633	0.64632
2206.2		0.45029	0.44126	0.64672
2207.6		0.46076	0.46224	0.65155
2209.1		0.46102	0.45544	0.66311
2210.5		0.44753	0.45058	0.64571
2211.9		0.46545	0.46123	0.648
2213.3		0.45115	0.46228	0.62381
2214.8		0.43157	0.45579	0.65915
2216.2		0.45426	0.43715	0.65196
2217.6		0.44039	0.45103	0.63656
2219		0.46311	0.45688	0.64142
2220.5		0.46046	0.46478	0.65144
2221.9		0.45343	0.45588	0.62879
2223.3		0.45374	0.45235	0.66062
2224.7		0.45581	0.44991	0.6464
2226.2		0.46075	0.44685	0.62715
2227.6		0.44734	0.44499	0.65003
2229		0.44607	0.45472	0.6471
2230.4		0.46221	0.45416	0.64821
2231.9		0.46029	0.45661	0.65976
2233.3		0.45392	0.45127	0.66217
2234.7		0.4468	0.45244	0.65549
2236.1		0.44353	0.46468	0.66168
2237.6		0.46064	0.45426	0.62892
2239		0.4483	0.44982	0.64993
2240.4		0.45401	0.46798	0.65794
2241.8		0.45867	0.45423	0.62962
2243.2		0.45842	0.45361	0.64854
2244.7		0.45769	0.46144	0.62912
2246.1		0.45404	0.46059	0.62556
2247.5		0.45614	0.46259	0.66468
2248.9		0.45657	0.45953	0.65957
2250.4		0.45715	0.45182	0.65788
2251.8		0.46556	0.46355	0.68314
2253.2		0.46337	0.448	0.65174
2254.6		0.45082	0.45556	0.62155
2256.1		0.45068	0.47107	0.64743
2257.5		0.45967	0.465	0.64597
2258.9		0.44754	0.46906	0.65302
2260.3		0.45992	0.44873	0.63995
2261.8		0.45621	0.45853	0.65858
2263.2		0.4548	0.4719	0.65103
2264.6		0.46394	0.46243	0.62423
2266		0.45052	0.46225	0.65052
2267.5		0.45296	0.46479	0.64559
2268.9		0.4557	0.4555	0.65071
2270.3		0.46034	0.45108	0.6576
2271.7		0.45473	0.46811	0.63914
2273.2		0.45194	0.46351	0.65674
2274.6		0.46328	0.46973	0.65486
2276		0.45128	0.47258	0.64495
2277.4		0.46888	0.4481	0.61424
2278.9		0.45907	0.44942	0.6762
2280.3		0.45573	0.45681	0.66709
2281.7		0.45822	0.45735	0.64556
2283.1		0.45854	0.45425	0.64325
2284.6		0.4632	0.45059	0.65334
2286		0.461	0.45323	0.634
2287.4		0.45875	0.46358	0.64451
2288.8		0.46199	0.45973	0.65444
2290.2		0.44346	0.44956	0.6441
2291.7		0.44784	0.45383	0.64874
2293.1		0.46597	0.45834	0.66664
2294.5		0.46329	0.47	0.66546
2295.9		0.46228	0.46461	0.65635
2297.4		0.45574	0.46369	0.64269
2298.8		0.45703	0.46822	0.64885
2300.2		0.46195	0.464	0.66834
2301.6		0.46675	0.44977	0.65297
2303.1		0.44862	0.45407	0.67428
2304.5		0.45726	0.46535	0.66411
2305.9		0.46641	0.46332	0.65346
2307.3		0.45201	0.4463	0.65245
2308.8		0.46591	0.46031	0.68114
2310.2		0.45705	0.45628	0.63679
2311.6		0.45932	0.46898	0.62696
2313		0.46601	0.46292	0.64418
2314.5		0.47162	0.46572	0.66564
2315.9		0.45651	0.45309	0.65387
2317.3		0.45827	0.46948	0.64555
2318.7		0.46999	0.44605	0.67131
2320.2		0.46476	0.46358	0.65032
2321.6		0.4572	0.46639	0.66514
2323		0.47791	0.47585	0.64974
2324.4		0.47167	0.46502	0.64901
2325.9		0.45429	0.45244	0.66695
2327.3		0.46349	0.46751	0.6757
2328.7		0.45799	0.46528	0.64501
2330.1		0.46244	0.45152	0.64781
2331.6		0.47637	0.47608	0.65303
2333		0.46168	0.47281	0.65115
2334.4		0.46637	0.47844	0.6734
2335.8		0.458	0.4653	0.67882
2337.3		0.46166	0.45966	0.68683
2338.7		0.45973	0.46198	0.65811
2340.1		0.46465	0.47549	0.67479
2341.5		0.45922	0.46025	0.67335
2342.9		0.46308	0.47771	0.64793
2344.4		0.45705	0.46948	0.66007
2345.8		0.45957	0.46001	0.65784
2347.2		0.46921	0.47421	0.65158
2348.6		0.46789	0.4672	0.63787
2350.1		0.45335	0.46297	0.65283
2351.5		0.46712	0.45876	0.65925
2352.9		0.45754	0.46509	0.64083
2354.3		0.46718	0.46767	0.64971
2355.8		0.46814	0.46039	0.67076
2357.2		0.47414	0.4615	0.65854
2358.6		0.46282	0.47688	0.65696
2360		0.46661	0.4517	0.66991
2361.5		0.47098	0.4833	0.68678
2362.9		0.45028	0.46779	0.64014
2364.3		0.46478	0.46281	0.66234
2365.7		0.47154	0.47819	0.64395
2367.2		0.46243	0.47433	0.66512
2368.6		0.45986	0.45963	0.65259
2370		0.47769	0.47033	0.65777
2371.4		0.46017	0.45305	0.66528
2372.9		0.45629	0.45155	0.68945
2374.3		0.46248	0.46682	0.65549
2375.7		0.46833	0.46127	0.67004
2377.1		0.46625	0.45756	0.65298
2378.6		0.46197	0.46989	0.65402
2380		0.46305	0.47056	0.67087
2381.4		0.45873	0.47326	0.67189
2382.8		0.46085	0.46274	0.67074
2384.3		0.45888	0.46542	0.66858
2385.7		0.46297	0.46884	0.67868
2387.1		0.46777	0.4698	0.64882
2388.5		0.4613	0.44941	0.67194
2389.9		0.47197	0.45962	0.65915
2391.4		0.47009	0.46068	0.68294
2392.8		0.46085	0.46027	0.66934
2394.2		0.46605	0.46864	0.67008
2395.6		0.47665	0.4654	0.66505
2397.1		0.462	0.44974	0.66272
2398.5		0.46412	0.45774	0.66709
2399.9		0.46311	0.46692	0.65596
2401.3		0.48205	0.48574	0.69347
2402.8		0.45389	0.46864	0.65352
2404.2		0.4582	0.47079	0.65763
2405.6		0.46965	0.46597	0.65186
2407		0.45989	0.47013	0.67583
2408.5		0.47257	0.48727	0.67976
2409.9		0.47219	0.46694	0.66253
2411.3		0.4681	0.46616	0.66728
2412.7		0.47475	0.4678	0.63979
2414.2		0.47239	0.4532	0.65221
2415.6		0.47513	0.46679	0.67201
2417		0.46633	0.46927	0.65073
2418.4		0.47017	0.47661	0.67778
2419.9		0.46124	0.47094	0.6737
2421.3		0.47552	0.45804	0.68974
2422.7		0.46599	0.47613	0.67207
2424.1		0.46793	0.47455	0.65125
2425.6		0.48681	0.46454	0.66011
2427		0.46991	0.47979	0.68184
2428.4		0.47139	0.47532	0.67252
2429.8		0.47501	0.47471	0.65449
2431.3		0.47156	0.47535	0.65726
2432.7		0.47951	0.47123	0.6646
2434.1		0.46968	0.48121	0.65381
2435.5		0.48102	0.47131	0.6786
2437		0.484	0.46763	0.69001
2438.4		0.47026	0.46736	0.6713
2439.8		0.46599	0.47294	0.6679
2441.2		0.47027	0.48279	0.68749
2442.6		0.45478	0.48126	0.67164
2444.1		0.4757	0.4693	0.66079
2445.5		0.47977	0.4622	0.67695
2446.9		0.47124	0.45294	0.69517
2448.3		0.46583	0.48348	0.68235
2449.8		0.48521	0.47194	0.68001
2451.2		0.47186	0.47267	0.67827
2452.6		0.46811	0.46912	0.67109
2454		0.46452	0.47141	0.66257
2455.5		0.47593	0.48351	0.6594
2456.9		0.46473	0.47367	0.67411
2458.3		0.46646	0.48176	0.66119
2459.7		0.48056	0.47337	0.67126
2461.2		0.47268	0.47589	0.67224
2462.6		0.46731	0.46952	0.66093
2464		0.47021	0.46327	0.67376
2465.4		0.46177	0.4749	0.66005
2466.9		0.46265	0.48534	0.66814
2468.3		0.47485	0.48989	0.67399
2469.7		0.46473	0.47999	0.67618
2471.1		0.4708	0.46621	0.6751
2472.6		0.4677	0.47863	0.68436
2474		0.4798	0.46661	0.67893
2475.4		0.46829	0.48206	0.66495
2476.8		0.47598	0.47195	0.65829
2478.3		0.46803	0.47316	0.69158
2479.7		0.45979	0.48265	0.68248
2481.1		0.47098	0.48715	0.69608
2482.5		0.46876	0.4649	0.6873
2484		0.47978	0.47396	0.66169
2485.4		0.48018	0.48084	0.6716
2486.8		0.46949	0.48357	0.68406
2488.2		0.46863	0.47839	0.70725
2489.6		0.47204	0.47381	0.66281
2491.1		0.4766	0.47961	0.65034
2492.5		0.4649	0.47352	0.67232
2493.9		0.48203	0.45394	0.65087
2495.3		0.47578	0.47168	0.66654
2496.8		0.47689	0.48321	0.65444
2498.2		0.46596	0.48201	0.64202
2499.6		0.47873	0.46952	0.65986
2501		0.47808	0.47837	0.65389
2502.5		0.47154	0.47943	0.67212
2503.9		0.46722	0.4718	0.66567
2505.3		0.46793	0.47703	0.67888
2506.7		0.47283	0.4694	0.68695
2508.2		0.46808	0.46359	0.67875
2509.6		0.48558	0.47113	0.6834
2511		0.47473	0.48017	0.6663
2512.4		0.46926	0.47517	0.68947
2513.9		0.48976	0.46536	0.66284
2515.3		0.46732	0.4721	0.69228
2516.7		0.47165	0.47814	0.68335
2518.1		0.46096	0.47222	0.65577
2519.6		0.47738	0.47082	0.6573
2521		0.48476	0.4806	0.6381
2522.4		0.4645	0.49089	0.66951
2523.8		0.47902	0.48594	0.67571
2525.3		0.47546	0.46311	0.67597
2526.7		0.47383	0.48453	0.70485
2528.1		0.46993	0.48166	0.68314
2529.5		0.47783	0.48229	0.66979
2531		0.47332	0.48051	0.68463
2532.4		0.46625	0.46752	0.68543
2533.8		0.48381	0.47906	0.69697
2535.2		0.48472	0.48853	0.65887
2536.7		0.47944	0.47867	0.67755
2538.1		0.46259	0.49572	0.6893
2539.5		0.47929	0.48043	0.69842
2540.9		0.4824	0.47608	0.69218
2542.3		0.46902	0.46792	0.68566
2543.8		0.48206	0.47778	0.69799
2545.2		0.48929	0.48522	0.68969
2546.6		0.47343	0.48772	0.68217
2548		0.48159	0.48972	0.65992
2549.5		0.48134	0.49537	0.68761
2550.9		0.46911	0.48513	0.67546
2552.3		0.46935	0.47287	0.65315
2553.7		0.47748	0.4638	0.67673
2555.2		0.46737	0.48194	0.69454
2556.6		0.47755	0.48882	0.68413
2558		0.48465	0.47976	0.67266
2559.4		0.48983	0.46943	0.69003
2560.9		0.47651	0.49136	0.69773
2562.3		0.48165	0.47408	0.68827
2563.7		0.48915	0.48127	0.66294
2565.1		0.46454	0.46954	0.65973
2566.6		0.48819	0.4775	0.66666
2568		0.47825	0.48077	0.68942
2569.4		0.48435	0.46973	0.68091
2570.8		0.47256	0.47943	0.66986
2572.3		0.48111	0.47572	0.63979
2573.7		0.47839	0.48874	0.67052
2575.1		0.48056	0.48801	0.69486
2576.5		0.47902	0.47511	0.68509
2578		0.48814	0.48535	0.68256
2579.4		0.48791	0.48562	0.68501
2580.8		0.4861	0.47712	0.68443
2582.2		0.47279	0.48452	0.67532
2583.7		0.47935	0.48165	0.66525
2585.1		0.47933	0.49293	0.68118
2586.5		0.46928	0.48238	0.69591
2587.9		0.4849	0.47525	0.67927
2589.3		0.48537	0.48677	0.70135
2590.8		0.476	0.48824	0.69211
2592.2		0.48854	0.49173	0.66857
2593.6		0.47496	0.48508	0.68121
2595		0.48493	0.48714	0.66536
2596.5		0.47795	0.49355	0.68547
2597.9		0.47859	0.47895	0.68955
2599.3		0.47172	0.49753	0.68523
2600.7		0.46819	0.47729	0.66949
2602.2		0.49534	0.47488	0.6673
2603.6		0.48437	0.49016	0.69412
2605		0.488	0.49212	0.67071
2606.4		0.47416	0.48803	0.70658
2607.9		0.47215	0.47648	0.67501
2609.3		0.48022	0.48465	0.67004
2610.7		0.49411	0.47996	0.66937
2612.1		0.49699	0.47532	0.69375
2613.6		0.4769	0.49242	0.69394
2615		0.48098	0.48297	0.68937
2616.4		0.47602	0.47924	0.71043
2617.8		0.47104	0.48261	0.69471
2619.3		0.47739	0.48285	0.69158
2620.7		0.4909	0.47638	0.70235
2622.1		0.47765	0.4815	0.70409
2623.5		0.50804	0.476	0.67496
2625		0.48629	0.50773	0.67854
2626.4		0.48547	0.49035	0.67857
2627.8		0.48712	0.49522	0.70083
2629.2		0.49226	0.49898	0.67753
2630.7		0.48992	0.48614	0.66414
2632.1		0.48192	0.4951	0.68631
2633.5		0.477	0.48013	0.6781
2634.9		0.49153	0.48553	0.68747
2636.4		0.47812	0.48215	0.67166
2637.8		0.48723	0.48113	0.68967
2639.2		0.4818	0.48472	0.70038
2640.6		0.4855	0.48252	0.67392
2642		0.48866	0.49326	0.71266
2643.5		0.49058	0.48957	0.67356
2644.9		0.49842	0.50526	0.67405
2646.3		0.48876	0.47965	0.677
2647.7		0.47437	0.48147	0.68425
2649.2		0.479	0.50047	0.68804
2650.6		0.4828	0.48602	0.67905
2652		0.48564	0.48069	0.66888
2653.4		0.47296	0.48299	0.67064
2654.9		0.48107	0.48457	0.68655
2656.3		0.48464	0.50631	0.6911
2657.7		0.49593	0.49483	0.68269
2659.1		0.49138	0.48844	0.67046
2660.6		0.47668	0.48226	0.68126
2662		0.48426	0.4949	0.67698
2663.4		0.48166	0.48818	0.6979
2664.8		0.50056	0.49198	0.68242
2666.3		0.49327	0.48867	0.68041
2667.7		0.49442	0.47286	0.6831
2669.1		0.4814	0.49271	0.68056
2670.5		0.49334	0.48036	0.69626
2672		0.47427	0.4866	0.67738
2673.4		0.48862	0.48678	0.70185
2674.8		0.47663	0.49367	0.71365
2676.2		0.48497	0.48299	0.66982
2677.7		0.49176	0.4866	0.66097
2679.1		0.48338	0.48138	0.6806
2680.5		0.47991	0.48176	0.6778
2681.9		0.48883	0.48523	0.68802
2683.4		0.47902	0.49542	0.66911
2684.8		0.4877	0.48805	0.69614
2686.2		0.48214	0.49877	0.68692
2687.6		0.48926	0.48704	0.69248
2689		0.48679	0.49126	0.70205
2690.5		0.49241	0.48878	0.65467
2691.9		0.4826	0.48246	0.6962
2693.3		0.49568	0.48864	0.69469
2694.7		0.48136	0.49368	0.66801
2696.2		0.48888	0.49617	0.70017
2697.6		0.48687	0.48777	0.69778
2699		0.49954	0.48565	0.69969
2700.4		0.50244	0.49349	0.68088
2701.9		0.47954	0.49715	0.66098
2703.3		0.49063	0.49016	0.69755
2704.7		0.49266	0.49047	0.66809
2706.1		0.48512	0.49066	0.69403
2707.6		0.4815	0.4897	0.67573
2709		0.48435	0.49725	0.70963
2710.4		0.50048	0.49053	0.68878
2711.8		0.48378	0.48218	0.68729
2713.3		0.48984	0.49357	0.68587
2714.7		0.49359	0.47701	0.70379
2716.1		0.48585	0.49476	0.68422
2717.5		0.4844	0.48284	0.65928
2719		0.49267	0.51089	0.69888
2720.4		0.49399	0.48732	0.70931
2721.8		0.48185	0.4846	0.68552
2723.2		0.49949	0.49027	0.71615
2724.7		0.47921	0.50427	0.69871
2726.1		0.49477	0.48721	0.69851
2727.5		0.49263	0.49125	0.69958
2728.9		0.483	0.4899	0.70016
2730.4		0.48428	0.47876	0.68056
2731.8		0.49153	0.48649	0.67562
2733.2		0.49228	0.48907	0.70611
2734.6		0.48693	0.49833	0.68036
2736.1		0.49362	0.49664	0.69069
2737.5		0.4961	0.49767	0.69386
2738.9		0.48679	0.48694	0.69017
2740.3		0.48763	0.46738	0.68788
2741.7		0.48224	0.49418	0.67703
2743.2		0.48656	0.48881	0.69484
2744.6		0.48717	0.49001	0.67344
2746		0.49686	0.49994	0.69753
2747.4		0.48946	0.48671	0.72592
2748.9		0.48631	0.48782	0.6945
2750.3		0.48767	0.49618	0.7156
2751.7		0.48081	0.49852	0.69054
2753.1		0.4994	0.50264	0.70126
2754.6		0.48858	0.47638	0.71121
2756		0.49257	0.51231	0.70616
2757.4		0.48928	0.49243	0.70171
2758.8		0.49588	0.49523	0.68976
2760.3		0.49356	0.48656	0.69885
2761.7		0.49128	0.49947	0.67874
2763.1		0.48674	0.4911	0.6617
2764.5		0.50831	0.50076	0.70052
2766		0.48799	0.50185	0.70392
2767.4		0.49296	0.49482	0.68168
2768.8		0.49091	0.50285	0.69428
2770.2		0.50317	0.50721	0.70997
2771.7		0.49191	0.48391	0.67188
2773.1		0.48656	0.50184	0.68042
2774.5		0.4928	0.50416	0.68207
2775.9		0.48816	0.48493	0.66324
2777.4		0.4983	0.50457	0.70194
2778.8		0.49953	0.48675	0.68052
2780.2		0.488	0.49537	0.69757
2781.6		0.49203	0.5019	0.71378
2783.1		0.49118	0.469	0.6944
2784.5		0.49565	0.50325	0.69307
2785.9		0.49365	0.50282	0.69472
2787.3		0.51547	0.49568	0.70832
2788.7		0.48713	0.5078	0.69043
2790.2		0.51373	0.50035	0.68657
2791.6		0.49628	0.51119	0.67658
2793		0.49827	0.49724	0.70801
2794.4		0.51272	0.49969	0.69793
2795.9		0.4961	0.49525	0.70465
2797.3		0.49678	0.48502	0.6938
2798.7		0.49894	0.50294	0.70504
2800.1		0.4968	0.49891	0.67531
2801.6		0.48299	0.48842	0.69405
2803		0.51502	0.48944	0.70395
2804.4		0.48854	0.49316	0.68668
2805.8		0.5034	0.49984	0.68975
2807.3		0.49763	0.49785	0.68223
2808.7		0.50752	0.50676	0.70083
2810.1		0.50156	0.4924	0.68382
2811.5		0.50379	0.49236	0.70863
2813		0.48268	0.48111	0.70459
2814.4		0.48036	0.48701	0.71147
2815.8		0.50439	0.49313	0.68822
2817.2		0.48866	0.50063	0.69398
2818.7		0.5032	0.50259	0.68774
2820.1		0.5003	0.51001	0.72384
2821.5		0.50312	0.50015	0.67335
2822.9		0.50181	0.48677	0.70338
2824.4		0.4965	0.49554	0.69016
2825.8		0.49471	0.50026	0.69201
2827.2		0.50105	0.4932	0.69949
2828.6		0.50966	0.51887	0.70075
2830.1		0.49696	0.48001	0.70844
2831.5		0.4946	0.49783	0.7029
2832.9		0.48581	0.49089	0.71135
[truncated: 2,955 more rows]

## Sheet: F4-FS1-B
Dose dependency GSK3 inhibitor	Combined Dconfocal (um2s-1)	Standard Error	Percentage error
2 micro Molar	0.46181	0.0250656	5.42764
6 micro Molar	0.44799	0.0247599	5.52688
10 micro Molar	0.61208	0.0337654	5.51647
