# Supplementary material for: Reversing protonation of weakly basic drugs greatly enhances intracellular diffusion and decreases lysosomal sequestration
Source: eLife. 2024 Dec 6;13:RP97255. doi: 10.7554/eLife.97255 (PMC11623935; doi:10.7554/eLife.97255)
Supplement: Figure 4—source data 1. [file elife-97255-fig4-data1.xlsx]

## Sheet: Figure 4A
Time axis (re-adjusted)	Pre-Bleach	DMEM Media	BSA (50mg/mL)	Cytoplasm	Hela extract		GSK3 inhib normalized FRAP profiles
-12.819	1
-11.394	1.0073
-9.97	1.0019
-8.5457	1.0017
7.1214	0.98605
-5.6971	1.0032
-4.2729	1.006
-2.8486	0.99207
-1.4243	0.97854
0		0.032842	0.057404	0.085172	0.13428
1.4243		0.039212	0.074329	0.081956	0.16205
2.8486		0.036177	0.08956	0.085251	0.17811
4.2729		0.033284	0.098585	0.090669	0.16923
5.6971		0.040304	0.11414	0.091408	0.207
7.1214		0.045737	0.12368	0.097763	0.21877
8.5457		0.042126	0.14603	0.085902	0.21598
9.97		0.046151	0.15432	0.097678	0.22005
11.394		0.046476	0.16847	0.09436	0.2383
12.819		0.044209	0.18034	0.1028	0.22742
14.243		0.055565	0.19316	0.10613	0.27874
15.667		0.052829	0.19784	0.10561	0.30113
17.091		0.054216	0.20024	0.10268	0.28527
18.516		0.052965	0.21405	0.11216	0.31024
19.94		0.059632	0.22753	0.11106	0.27984
21.364		0.057501	0.23461	0.10226	0.30546
22.789		0.060941	0.23976	0.11805	0.32283
24.213		0.063959	0.24691	0.11685	0.35497
25.637		0.0582	0.25397	0.1163	0.32043
27.061		0.067059	0.25895	0.12183	0.34023
28.486		0.068631	0.2804	0.11541	0.32876
29.91		0.063229	0.27859	0.12477	0.34595
31.334		0.072451	0.27959	0.11248	0.34268
32.759		0.066995	0.28429	0.12505	0.33247
34.183		0.072778	0.29959	0.13011	0.34513
35.607		0.073859	0.29976	0.11616	0.37228
37.031		0.075158	0.31029	0.12453	0.37986
38.456		0.077438	0.3026	0.12174	0.39949
39.88		0.082316	0.32039	0.12539	0.42562
41.304		0.084827	0.32798	0.12302	0.40205
42.729		0.080968	0.32485	0.13488	0.41259
44.153		0.082999	0.33471	0.13118	0.41827
45.577		0.077848	0.32943	0.12607	0.4342
47.001		0.080476	0.34782	0.13037	0.40797
48.426		0.089051	0.35172	0.13071	0.45011
49.85		0.078558	0.35112	0.14457	0.46825
51.274		0.087048	0.35701	0.14029	0.4815
52.699		0.087347	0.3694	0.12891	0.44624
54.123		0.085238	0.35717	0.14727	0.47532
55.547		0.090444	0.35909	0.14006	0.46708
56.971		0.089365	0.38157	0.15128	0.46346
58.396		0.089634	0.37864	0.14831	0.45682
59.82		0.10133	0.37872	0.14742	0.49973
61.244		0.10333	0.39125	0.14731	0.48375
62.669		0.10477	0.38219	0.14385	0.50832
64.093		0.099289	0.39992	0.14534	0.48513
65.517		0.098533	0.3901	0.13646	0.49974
66.941		0.10576	0.41126	0.15636	0.50841
68.366		0.10698	0.40414	0.15575	0.52238
69.79		0.10188	0.4065	0.15571	0.52873
71.214		0.1014	0.41837	0.1522	0.49539
72.639		0.10043	0.4137	0.14219	0.52757
74.063		0.10795	0.41519	0.17175	0.5228
75.487		0.10513	0.43119	0.15063	0.50705
76.911		0.10607	0.43406	0.15517	0.51712
78.336		0.10658	0.42626	0.15966	0.5492
79.76		0.10455	0.43809	0.16459	0.59291
81.184		0.11613	0.43155	0.17282	0.5056
82.609		0.11334	0.43398	0.17985	0.53437
84.033		0.10584	0.44428	0.15388	0.53837
85.457		0.12039	0.43986	0.17445	0.55221
86.881		0.10508	0.44196	0.16379	0.55042
88.306		0.11947	0.44801	0.16154	0.60653
89.73		0.12475	0.44746	0.18018	0.57752
91.154		0.11677	0.45322	0.16918	0.5666
92.579		0.11502	0.45478	0.1593	0.59867
94.003		0.11515	0.46052	0.17766	0.56438
95.427		0.11736	0.46776	0.16178	0.59394
96.851		0.12356	0.47199	0.17383	0.59367
98.276		0.11835	0.46278	0.16089	0.5938
99.7		0.12032	0.46745	0.17692	0.61195
101.12		0.1241	0.46659	0.17501	0.59502
102.55		0.12977	0.47821	0.17822	0.60387
103.97		0.12476	0.47676	0.1799	0.59424
105.4		0.12799	0.47066	0.17712	0.60052
106.82		0.13047	0.48068	0.18704	0.61264
108.25		0.1357	0.48515	0.17395	0.58532
109.67		0.12438	0.48842	0.18754	0.6546
111.09		0.13495	0.49104	0.17869	0.59109
112.52		0.12997	0.47936	0.18385	0.68524
113.94		0.13779	0.49277	0.19015	0.61751
115.37		0.1328	0.50247	0.19062	0.61689
116.79		0.1355	0.50129	0.18665	0.61298
118.22		0.13463	0.50877	0.17903	0.62703
119.64		0.14101	0.51166	0.19698	0.65347
121.06		0.13738	0.50896	0.19588	0.60227
122.49		0.14239	0.51693	0.2029	0.66538
123.91		0.14002	0.5082	0.18446	0.64731
125.34		0.13507	0.52058	0.19054	0.65087
126.76		0.13498	0.51638	0.19753	0.63941
128.19		0.13915	0.51303	0.18066	0.62469
129.61		0.14191	0.5219	0.19258	0.60654
131.03		0.14417	0.53822	0.19893	0.65281
132.46		0.13529	0.5233	0.18198	0.6709
133.88		0.15082	0.53397	0.19626	0.64909
135.31		0.15077	0.52692	0.1872	0.6573
136.73		0.14776	0.53454	0.20509	0.69182
138.16		0.14607	0.52671	0.20295	0.64362
139.58		0.13885	0.53177	0.2112	0.64529
141		0.14916	0.53216	0.19854	0.67109
142.43		0.13659	0.54343	0.20322	0.68354
143.85		0.14958	0.54781	0.21281	0.67758
145.28		0.15599	0.5399	0.20956	0.65694
146.7		0.1455	0.5404	0.20718	0.67781
148.13		0.15801	0.54881	0.22094	0.71716
149.55		0.15035	0.55566	0.21616	0.68253
150.97		0.14643	0.54384	0.20325	0.66261
152.4		0.15225	0.56515	0.2111	0.6696
153.82		0.15348	0.55267	0.20152	0.65203
155.25		0.15505	0.54895	0.2185	0.65744
156.67		0.1458	0.55926	0.21878	0.68566
158.1		0.15136	0.56126	0.20699	0.66072
159.52		0.1597	0.55757	0.21345	0.67992
160.94		0.15775	0.55228	0.21584	0.70746
162.37		0.15748	0.5614	0.21374	0.7285
163.79		0.15128	0.56117	0.20421	0.66321
165.22		0.15327	0.56744	0.224	0.70378
166.64		0.1552	0.56082	0.21131	0.71288
168.07		0.15612	0.58295	0.21303	0.68714
169.49		0.16074	0.5629	0.23922	0.69552
170.91		0.16101	0.56842	0.2178	0.68972
172.34		0.16136	0.5648	0.20272	0.73335
173.76		0.16771	0.57227	0.23454	0.75857
175.19		0.16681	0.55902	0.2286	0.68237
176.61		0.16428	0.58021	0.21906	0.73242
178.04		0.16275	0.57164	0.22832	0.76071
179.46		0.15911	0.58025	0.2268	0.73001
180.88		0.15907	0.5818	0.21677	0.72013
182.31		0.17006	0.57399	0.21797	0.70796
183.73		0.1573	0.58326	0.23789	0.7144
185.16		0.16192	0.56604	0.24599	0.70092
186.58		0.1573	0.5935	0.21848	0.77625
188.01		0.16598	0.59108	0.22784	0.69986
189.43		0.16569	0.59999	0.2281	0.73163
190.85		0.17086	0.57585	0.22491	0.75035
192.28		0.1683	0.58109	0.23531	0.73281
193.7		0.17088	0.59678	0.23549	0.77118
195.13		0.17816	0.59538	0.22435	0.7339
196.55		0.18272	0.59478	0.21746	0.74164
197.98		0.18145	0.58939	0.23663	0.75297
199.4		0.16308	0.60966	0.21895	0.74173
200.82		0.16547	0.59899	0.22347	0.74936
202.25		0.17123	0.59963	0.2352	0.74243
203.67		0.17193	0.59561	0.23475	0.79723
205.1		0.17938	0.60533	0.2292	0.75207
206.52		0.17135	0.59607	0.2346	0.77282
207.95		0.16571	0.60499	0.23152	0.75507
209.37		0.17058	0.60528	0.23956	0.76004
210.79		0.17259	0.60524	0.22888	0.75858
212.22		0.17495	0.59965	0.23711	0.72177
213.64		0.17074	0.60938	0.24112	0.77052
215.07		0.18127	0.61701	0.25113	0.74109
216.49		0.165	0.60531	0.23307	0.75637
217.92		0.16546	0.60038	0.23489	0.76236
219.34		0.16661	0.60525	0.25818	0.79991
220.76		0.16619	0.60656	0.22858	0.76079
222.19		0.17474	0.607	0.24992	0.75897
223.61		0.17608	0.6088	0.244	0.73971
225.04		0.16862	0.6319	0.24818	0.79291
226.46		0.1718	0.61762	0.25281	0.73717
227.89		0.17712	0.60268	0.24895	0.76145
229.31		0.18161	0.62014	0.25033	0.74221
230.73		0.17245	0.61405	0.24869	0.7753
232.16		0.18617	0.61838	0.25667	0.77299
233.58		0.1691	0.63796	0.24649	0.77155
235.01		0.17161	0.62173	0.25541	0.74829
236.43		0.17616	0.61831	0.26197	0.7587
237.86		0.18292	0.61522	0.2517	0.75031
239.28		0.17199	0.6204	0.23964	0.74046
240.7		0.19513	0.62834	0.26718	0.76833
242.13		0.17619	0.63345	0.25463	0.777
243.55		0.17559	0.63633	0.25939	0.78623
244.98		0.17763	0.6356	0.2637	0.81052
246.4		0.18441	0.62936	0.26036	0.78001
247.83		0.19382	0.62451	0.26548	0.77745
249.25		0.18	0.62548	0.25052	0.74988
250.67		0.18045	0.63624	0.26626	0.73549
252.1		0.18319	0.64199	0.25805	0.74759
253.52		0.19096	0.63512	0.2641	0.7796
254.95		0.17662	0.62659	0.25854	0.75711
256.37		0.18125	0.62771	0.2488	0.80913
257.8		0.17987	0.63538	0.27319	0.81846
259.22		0.18767	0.62978	0.2664	0.77685
260.64		0.19122	0.6354	0.26891	0.78995
262.07		0.20412	0.65261	0.26199	0.78746
263.49		0.18172	0.64688	0.25275	0.77007
264.92		0.186	0.63954	0.27342	0.78728
266.34		0.18352	0.63518	0.25948	0.83166
267.77		0.18898	0.65378	0.26646	0.79221
269.19		0.19637	0.64653	0.24313	0.7725
270.61		0.19702	0.65212	0.27089	0.81872
272.04		0.19364	0.63554	0.26424	0.76892
273.46		0.18122	0.64885	0.25985	0.82194
274.89		0.18258	0.65227	0.26172	0.82444
276.31		0.18772	0.65423	0.28242	0.82017
277.74		0.19253	0.64787	0.25461	0.79495
279.16		0.19065	0.63879	0.26506	0.79337
280.58		0.18309	0.66095	0.26265	0.78125
282.01		0.18406	0.67077	0.26839	0.79868
283.43		0.19855	0.64829	0.26733	0.81962
284.86		0.18089	0.63971	0.26416	0.77258
286.28		0.19425	0.64372	0.26854	0.78312
287.71		0.18629	0.66664	0.27482	0.80842
289.13		0.18336	0.65515	0.29579	0.78728
290.55		0.20282	0.65178	0.28275	0.806
291.98		0.17899	0.67377	0.2731	0.83817
293.4		0.18728	0.65315	0.28943	0.76453
294.83		0.17919	0.65231	0.27877	0.79967
296.25		0.18858	0.64544	0.27386	0.85807
297.68		0.18618	0.65991	0.26127	0.80754
299.1		0.19864	0.65736	0.28778	0.8357
300.52		0.19918	0.65284	0.28309	0.83462
301.95		0.19073	0.65355	0.28257	0.85168
303.37		0.18902	0.66485	0.28519	0.85068
304.8		0.19867	0.66701	0.27282	0.82793
306.22		0.20249	0.66511	0.2715	0.81304
307.65		0.18991	0.6735	0.29115	0.77799
309.07		0.1977	0.67115	0.29344	0.82072
310.49		0.20101	0.66892	0.28187	0.80326
311.92		0.18544	0.67141	0.27725	0.80628
313.34		0.19286	0.67049	0.27751	0.82542
314.77		0.1952	0.68256	0.28	0.82846
316.19		0.19359	0.67542	0.27934	0.81103
317.62		0.19911	0.66695	0.28476	0.84969
319.04		0.19339	0.66649	0.28049	0.80431
320.46		0.19277	0.67088	0.28789	0.82074
321.89		0.19625	0.66937	0.27047	0.87642
323.31		0.18783	0.65659	0.28095	0.79242
324.74		0.21148	0.68301	0.30872	0.84943
326.16		0.19809	0.6768	0.29293	0.82726
327.59		0.20273	0.66933	0.30865	0.81746
329.01		0.20259	0.67345	0.2895	0.80588
330.43		0.20486	0.68414	0.27721	0.85414
331.86		0.19359	0.67334	0.27888	0.87471
333.28		0.1982	0.68559	0.29764	0.85613
334.71		0.19875	0.67944	0.29652	0.86056
336.13		0.20062	0.68637	0.30261	0.82801
337.56		0.19936	0.68297	0.29449	0.83994
338.98		0.21162	0.69346	0.30209	0.84228
340.4		0.19707	0.67928	0.29472	0.83517
341.83		0.19301	0.69178	0.29152	0.83408
343.25		0.19533	0.68226	0.29001	0.85376
344.68		0.20162	0.67754	0.2931	0.86387
346.1		0.21011	0.68116	0.29242	0.82316
347.53		0.21057	0.69735	0.29416	0.87702
348.95		0.19024	0.68283	0.29749	0.81582
350.37		0.1973	0.68604	0.30258	0.83667
351.8		0.21525	0.69632	0.28517	0.85657
353.22		0.19436	0.69644	0.30135	0.80291
354.65		0.20243	0.68639	0.31094	0.80414
356.07		0.2089	0.69055	0.30264	0.82854
357.5		0.20202	0.69466	0.30626	0.8534
358.92		0.20405	0.69148	0.30285	0.86538
360.34		0.21552	0.69376	0.31304	0.87282
361.77		0.20276	0.68265	0.31289	0.86767
363.19		0.19536	0.68698	0.30479	0.85881
364.62		0.22234	0.6933	0.29277	0.85478
366.04		0.2142	0.68698	0.29939	0.84488
367.47		0.21903	0.68684	0.30787	0.86654
368.89		0.20162	0.68794	0.31789	0.83415
370.31		0.20023	0.70209	0.30702	0.82838
371.74		0.21066	0.70301	0.31351	0.79298
373.16		0.20416	0.68794	0.31584	0.84564
374.59		0.21257	0.69176	0.28964	0.85459
376.01		0.2011	0.70691	0.31425	0.8782
377.44		0.20385	0.69172	0.29872	0.81834
378.86		0.21169	0.69667	0.31615	0.87554
380.28		0.20885	0.68982	0.31078	0.87811
381.71		0.20324	0.70659	0.29638	0.88334
383.13		0.20125	0.71064	0.30641	0.83959
384.56		0.20513	0.69699	0.31517	0.86267
385.98		0.20483	0.68739	0.30858	0.85358
387.41		0.21238	0.69196	0.31985	0.8707
388.83		0.21234	0.69845	0.30604	0.87058
390.25		0.21559	0.70759	0.31543	0.88956
391.68		0.21342	0.69341	0.32505	0.86863
393.1		0.20533	0.70642	0.3183	0.86851
394.53		0.20648	0.69836	0.31974	0.93097
395.95		0.20054	0.71259	0.31654	0.86714
397.38		0.21995	0.71268	0.32703	0.86733
398.8		0.20066	0.70193	0.32839	0.85733
400.22		0.20522	0.69837	0.30818	0.84287
401.65		0.21859	0.69988	0.32166	0.83493
403.07		0.22276	0.71207	0.31691	0.8643
404.5		0.21563	0.70065	0.30333	0.87101
405.92		0.21454	0.7073	0.30981	0.85915
407.35		0.21084	0.72139	0.3318	0.87335
408.77		0.20954	0.72033	0.31632	0.88175
410.19		0.21315	0.70901	0.329	0.88136
411.62		0.20486	0.71427	0.3022	0.92583
413.04		0.20894	0.70021	0.33561	0.91305
414.47		0.20799	0.71902	0.32471	0.84255
415.89		0.20638	0.7136	0.32131	0.89975
417.32		0.21323	0.71	0.30993	0.91946
418.74		0.19777	0.70799	0.32022	0.91401
420.16		0.21165	0.72904	0.31956	0.86632
421.59		0.20664	0.71025	0.32677	0.90124
423.01		0.2192	0.71823	0.34743	0.87823
424.44		0.21294	0.72176	0.32235	0.87479
425.86		0.20523	0.71389	0.33189	0.87772
427.29		0.21216	0.71521	0.32723	0.8284
428.71		0.2166	0.72447	0.33291	0.85735
430.13		0.22436	0.72185	0.34532	0.89163
431.56		0.22309	0.71083	0.30434	0.92161
432.98		0.21667	0.71176	0.3184	0.89522
434.41		0.22133	0.71771	0.34608	0.87524
435.83		0.2232	0.71253	0.33009	0.89245
437.26		0.22245	0.72396	0.33981	0.88488
438.68		0.21542	0.71906	0.30365	0.8595
440.1		0.21736	0.72095	0.32177	0.89625
441.53		0.21963	0.73037	0.33836	0.90104
442.95		0.2074	0.72013	0.31189	0.92002
444.38		0.20404	0.72704	0.32388	0.90793
445.8		0.20913	0.7337	0.33416	0.87716
447.23		0.22282	0.72081	0.33896	0.85659
448.65		0.21664	0.73055	0.32862	0.89487
450.07		0.21929	0.72548	0.32734	0.89991
451.5		0.21413	0.71651	0.33026	0.89703
452.92		0.21901	0.71971	0.34504	0.88931
454.35		0.2135	0.72871	0.33637	0.8811
455.77		0.20737	0.72368	0.34049	0.89159
457.2		0.21965	0.73445	0.33891	0.88823
458.62		0.20768	0.7227	0.35538	0.89951
460.04		0.22299	0.73243	0.32497	0.87014
461.47		0.21968	0.72573	0.33821	0.87693
462.89		0.21509	0.7282	0.3515	0.91125
464.32		0.22344	0.73401	0.33817	0.88772
465.74		0.21682	0.73162	0.34395	0.89255
467.17		0.22396	0.72888	0.33819	0.88537
468.59		0.22307	0.73141	0.32034	0.86832
470.01		0.22326	0.72941	0.34384	0.88964
471.44		0.23073	0.723	0.34121	0.84345
472.86		0.22785	0.73727	0.34682	0.90862
474.29		0.21874	0.72938	0.33339	0.93435
475.71		0.21611	0.72938	0.33151	0.8923
477.14		0.21728	0.73709	0.34381	0.92406
478.56		0.2317	0.7319	0.32328	0.91531
479.98		0.21391	0.73854	0.34735	0.95866
481.41		0.22084	0.72632	0.34993	0.90379
482.83		0.21787	0.74036	0.34843	0.93559
484.26		0.2316	0.73876	0.351	0.91246
485.68		0.22372	0.73277	0.34466	0.88798
487.11		0.22916	0.74322	0.35646	0.85837
488.53		0.2215	0.72423	0.34292	0.92326
489.95		0.22129	0.73077	0.34032	0.86023
491.38		0.21622	0.74158	0.34113	0.87495
492.8		0.2304	0.74311	0.33747	0.92881
494.23		0.22498	0.73309	0.35322	0.93797
495.65		0.22638	0.73772	0.3465	0.88576
497.08		0.22381	0.73056	0.33951	0.86088
498.5		0.22401	0.74447	0.34935	0.90027
499.92		0.23265	0.73814	0.34807	0.91943
501.35		0.2208	0.73665	0.33989	0.93035
502.77		0.22262	0.73012	0.32658	0.89098
504.2		0.22118	0.72866	0.35554	0.92208
505.62		0.2213	0.73712	0.33958	0.92819
507.05		0.21922	0.74506	0.33939	0.89379
508.47		0.22865	0.7358	0.36244	0.88494
509.89		0.23003	0.74203	0.34164	0.89145
511.32		0.22699	0.75125	0.34101	0.89325
512.74		0.21802	0.73842	0.34353	0.93134
514.17		0.22767	0.74204	0.35834	0.89388
515.59		0.22885	0.73009	0.35658	0.93958
517.02		0.22968	0.75039	0.35137	0.88319
518.44		0.22983	0.74871	0.35228	0.93409
519.86		0.22036	0.73848	0.35412	0.90845
521.29		0.22262	0.75204	0.37171	0.92677
522.71		0.22173	0.75962	0.36347	0.87908
524.14		0.21133	0.73659	0.36351	0.96693
525.56		0.21106	0.75148	0.35661	0.92946
526.99		0.22818	0.75683	0.35777	0.90321
528.41		0.22035	0.74615	0.37098	0.91691
529.83		0.22761	0.75104	0.37294	0.88108
531.26		0.2313	0.73926	0.36448	0.87451
532.68		0.23	0.74275	0.35933	0.97979
534.11		0.23406	0.74251	0.34189	0.90773
535.53		0.22913	0.74491	0.34493	0.92244
536.96		0.22819	0.75429	0.36895	0.92724
538.38		0.22754	0.74526	0.35066	0.93346
539.8		0.22948	0.73988	0.34704	0.93632
541.23		0.22506	0.75312	0.36128	0.9034
542.65		0.23131	0.75564	0.34709	0.91826
544.08		0.24402	0.74005	0.37024	0.9387
545.5		0.21732	0.74144	0.35882	0.91555
546.93		0.22462	0.74555	0.37291	0.90512
548.35		0.23624	0.74071	0.36993	0.89095
549.77		0.23999	0.75001	0.37569	0.88703
551.2		0.22781	0.75596	0.36253	0.87458
552.62		0.23244	0.7432	0.39057	0.92252
554.05		0.22739	0.74762	0.36143	0.90785
555.47		0.22065	0.7565	0.36948	0.9593
556.9		0.22829	0.75075	0.37311	0.93227
558.32		0.23392	0.75136	0.37132	0.9414
559.74		0.23519	0.75811	0.37041	0.92482
561.17		0.22733	0.74677	0.36135	0.95452
562.59		0.22415	0.74939	0.36767	0.90069
564.02		0.22467	0.74982	0.3481	0.96861
565.44		0.23613	0.76617	0.35866	0.91559
566.87		0.23505	0.76335	0.36941	0.93147
568.29		0.2377	0.75168	0.38011	0.91584
569.71		0.2387	0.74506	0.36092	0.94666
571.14		0.23009	0.76011	0.38198	0.90765
572.56		0.23709	0.75875	0.36356	0.94966
573.99		0.23319	0.75166	0.37518	0.94191
575.41		0.23441	0.76729	0.36435	0.92013
576.84		0.22867	0.74528	0.38081	0.93482
578.26		0.2349	0.76152	0.38513	0.90664
579.68		0.23169	0.76052	0.37423	0.92126
581.11		0.24967	0.76564	0.3716	0.95952
582.53		0.22932	0.74456	0.3802	0.9191
583.96		0.22977	0.73924	0.38297	0.93641
585.38		0.23417	0.75852	0.37473	0.95132
586.81		0.22131	0.76166	0.37743	0.93268
588.23		0.22919	0.75226	0.37637	0.94215
589.65		0.22756	0.7516	0.37001	0.93517
591.08		0.23802	0.76504	0.37564	0.94736
592.5		0.23168	0.75587	0.36467	0.95942
593.93		0.23283	0.75848	0.37918	0.91183
595.35		0.23861	0.76015	0.38601	0.9116
596.78		0.22636	0.74766	0.3973	0.94078
598.2		0.23336	0.773	0.36934	0.97658
599.62		0.23139	0.76862	0.37966	0.95403
601.05		0.22633	0.75684	0.38288	0.93796
602.47		0.22962	0.76104	0.36577	0.95286
603.9		0.23534	0.74678	0.38988	0.94551
605.32		0.23922	0.7528	0.37135	0.93759
606.75		0.21529	0.77594	0.37668	0.96587
608.17		0.23362	0.76332	0.38789	0.91781
609.59		0.24078	0.76832	0.37596	0.98214
611.02		0.23346	0.77229	0.3593	0.90288
612.44		0.23476	0.77171	0.39922	0.9399
613.87		0.22847	0.75753	0.37705	0.95579
615.29		0.22533	0.77728	0.38681	0.95305
616.72		0.21676	0.75663	0.40035	0.9299
618.14		0.24474	0.76111	0.38608	0.95852
619.56		0.22264	0.77465	0.37098	0.97142
620.99		0.23172	0.77268	0.37912	0.93112
622.41		0.23199	0.7713	0.40385	0.93161
623.84		0.23709	0.75914	0.39016	0.94866
625.26		0.22136	0.7695	0.40309	0.95592
626.69		0.22603	0.76855	0.38716	0.91377
628.11		0.23046	0.77138	0.40295	0.95142
629.53		0.239	0.75683	0.3786	0.98982
630.96		0.24391	0.77059	0.37374	0.97267
632.38		0.23748	0.76595	0.38898	0.9459
633.81		0.22625	0.76374	0.38445	0.97461
635.23		0.23231	0.75731	0.38182	0.94549
636.66		0.24361	0.77191	0.40961	0.95512
638.08		0.22446	0.77536	0.39349	0.9539
639.5		0.23896	0.77016	0.40294	0.9632
640.93		0.24187	0.75785	0.38601	0.93714
642.35		0.23344	0.76359	0.38308	0.9239
643.78		0.23878	0.7724	0.39789	0.95828
645.2		0.23689	0.77313	0.39482	0.95764
646.63		0.23048	0.7712	0.38497	0.94682
648.05		0.24011	0.76726	0.3792	0.96511
649.47		0.22376	0.77822	0.41223	0.97778
650.9		0.23074	0.78208	0.41072	0.89893
652.32		0.22202	0.78475	0.38877	0.9194
653.75		0.2294	0.76711	0.40316	0.97188
655.17		0.23905	0.77595	0.40352	0.90837
656.6		0.23292	0.78593	0.38847	0.93269
658.02		0.23271	0.78822	0.40156	0.95528
659.44		0.23222	0.79052	0.38965	0.95078
660.87		0.23435	0.76719	0.3898	0.97456
662.29		0.22808	0.7844	0.40827	0.93576
663.72		0.23425	0.78718	0.41123	0.90472
665.14		0.23304	0.77534	0.39239	0.94154
666.57		0.23738	0.76952	0.39733	0.98053
667.99		0.22435	0.77383	0.39488	0.98297
669.41		0.23495	0.79596	0.38427	0.91976
670.84		0.24363	0.7778	0.40666	0.92635
672.26		0.24249	0.77938	0.39635	0.95178
673.69		0.24072	0.76286	0.39509	0.90324
675.11		0.23895	0.77163	0.38473	0.93823
676.54		0.22863	0.77341	0.38969	0.97392
677.96		0.24075	0.76989	0.41195	0.91341
679.38		0.23868	0.77327	0.39745	1.0012
680.81		0.23399	0.77633	0.39659	0.98254
682.23		0.23508	0.77402	0.39632	0.95383
683.66		0.24166	0.7858	0.41266	0.97661
685.08		0.23933	0.7755	0.40702	0.92072
686.51		0.24012	0.77616	0.40007	0.95879
687.93		0.24175	0.80029	0.4197	0.98495
689.35		0.2449	0.78452	0.41271	0.99749
690.78		0.24817	0.77417	0.4029	0.96476
692.2		0.22643	0.77781	0.40206	0.93666
693.63		0.24084	0.79626	0.41979	0.96018
695.05		0.23937	0.77053	0.39523	0.91616
696.48		0.23858	0.7909	0.39351	0.93637
697.9		0.22304	0.78515	0.39322	0.96574
699.32		0.22694	0.78774	0.41733	0.94732
700.75		0.24364	0.7841	0.39895	0.99437
702.17		0.23668	0.79186	0.40534	0.93897
703.6		0.23846	0.78604	0.41047	0.96845
705.02		0.23473	0.78805	0.39434	0.92607
706.45		0.24212	0.78628	0.41661	0.92663
707.87		0.25086	0.79061	0.42476	0.98367
709.29		0.2377	0.77966	0.40584	0.98574
710.72		0.22047	0.77264	0.39865	0.96872
712.14		0.23475	0.78508	0.40721	0.94271
713.57		0.23617	0.78536	0.40323	1.0063
714.99		0.22439	0.7733	0.41201	0.97756
716.42		0.24315	0.77315	0.40461	0.95649
717.84		0.23415	0.79214	0.40495	0.95552
719.26		0.25468	0.78163	0.40169	0.9623
720.69		0.23486	0.79444	0.42393	0.91116
722.11		0.23179	0.79087	0.40808	0.97836
723.54		0.23282	0.76983	0.39884	0.962
724.96		0.24332	0.79146	0.41163	0.93394
726.39		0.23775	0.79308	0.42344	0.9633
727.81		0.23437	0.80644	0.41424	0.94028
729.23		0.23239	0.78355	0.42715	0.92358
730.66		0.2329	0.79936	0.40891	0.93936
732.08		0.23376	0.78716	0.41796	0.96152
733.51		0.23721	0.77234	0.41619	0.94251
734.93		0.24966	0.76996	0.42302	0.96211
736.36		0.24077	0.79077	0.42031	0.92852
737.78		0.24229	0.79309	0.42545	0.92577
739.2		0.22746	0.79131	0.40884	0.94138
740.63		0.23265	0.79186	0.42438	0.96918
742.05		0.24927	0.79356	0.42721	0.98642
743.48		0.24132	0.7931	0.41326	0.95918
744.9		0.24392	0.78397	0.41535	0.96677
746.33		0.24739	0.80339	0.40813	0.92403
747.75		0.23791	0.77383	0.41601	0.97143
749.17		0.24599	0.78604	0.43337	1.0318
750.6		0.23973	0.7992	0.42779	0.94844
752.02		0.22532	0.79767	0.4174	0.97314
753.45		0.2406	0.7895	0.41326	0.95677
754.87		0.23472	0.80734	0.42359	0.94736
756.3		0.23559	0.79247	0.42717	0.94504
757.72		0.2452	0.79222	0.41021	0.93979
759.14		0.24335	0.79644	0.42347	0.9716
760.57		0.24665	0.78737	0.42336	0.96911
761.99		0.24265	0.80644	0.40414	0.95845
763.42		0.22686	0.79146	0.45145	0.9973
764.84		0.24173	0.79215	0.4042	0.93855
766.27		0.23004	0.78259	0.41393	0.96911
767.69		0.24697	0.79951	0.43194	0.98072
769.11		0.24978	0.79653	0.42697	0.9939
770.54		0.23043	0.79956	0.43347	0.9824
771.96		0.22804	0.79533	0.44366	0.96765
773.39		0.23763	0.79724	0.43499	0.95967
774.81		0.2381	0.80026	0.42783	0.99012
776.24		0.23539	0.79414	0.43631	0.95694
777.66		0.24312	0.78867	0.40758	0.98893
779.08		0.23714	0.79824	0.41038	0.98533
780.51		0.23672	0.79852	0.41733	0.97928
781.93		0.24819	0.78178	0.41596	1.0039
783.36		0.24139	0.78695	0.4185	1.0192
784.78		0.241	0.80929	0.43245	0.98281
786.21		0.24194	0.79124	0.42698	0.96606
787.63		0.24793	0.7983	0.43268	0.93168
789.05		0.24668	0.79917	0.43582	0.91729
790.48		0.25357	0.80769	0.41761	0.99113
791.9		0.23289	0.78889	0.42242	0.93534
793.33		0.24151	0.80331	0.42508	1.0027
794.75		0.23437	0.78864	0.40813	0.98099
796.18		0.25248	0.80428	0.42952	0.97344
797.6		0.24128	0.79781	0.44987	0.9857
799.02		0.2496	0.79696	0.42368	0.99095
800.45		0.23798	0.79898	0.45887	0.97569
801.87		0.24996	0.79584	0.40956	0.94401
803.3		0.24179	0.80004	0.43982	0.97178
804.72		0.23842	0.80369	0.44089	0.96041
806.15		0.24694	0.80372	0.42818	0.99649
807.57		0.24034	0.78999	0.43251	0.99667
808.99		0.23196	0.79228	0.42328	1.0148
810.42		0.23858	0.79752	0.44111	1.0063
811.84		0.23698	0.80651	0.43736	0.95597
813.27		0.24561	0.79107	0.43953	0.96718
814.69		0.24835	0.80572	0.44638	0.93037
816.12		0.2343	0.79801	0.43951	0.96706
817.54		0.24171	0.81281	0.43836	0.96096
818.96		0.23876	0.81143	0.43309	0.96395
820.39		0.24661	0.80725	0.4478	1.0318
821.81		0.25244	0.8093	0.4466	0.8878
823.24		0.25315	0.79495	0.45744	0.9644
824.66		0.24169	0.79457	0.43019	0.9707
826.09		0.25627	0.80172	0.43226	0.99279
827.51		0.24471	0.81284	0.42281	0.99419
828.93		0.24854	0.80613	0.43868	0.95277
830.36		0.25176	0.79567	0.41858	0.95993
831.78		0.24882	0.80492	0.45149	0.98129
833.21		0.2542	0.77259	0.43659	0.96061
834.63		0.23735	0.81083	0.43762	0.96667
836.06		0.24974	0.78712	0.45961	0.93356
837.48		0.24457	0.81356	0.43792	0.98491
838.9		0.24595	0.80803	0.43658	0.93302
840.33		0.24883	0.79418	0.42976	0.96521
841.75		0.23357	0.80624	0.44404	0.95713
843.18		0.24207	0.80016	0.43752	0.99257
844.6		0.2535	0.81259	0.4661	0.97695
846.03		0.23178	0.80341	0.44172	1.0125
847.45		0.2458	0.80127	0.41323	1.01
848.87		0.25425	0.79645	0.44068	0.99854
850.3		0.24952	0.79342	0.43812	0.99749
851.72		0.25955	0.80052	0.42147	1.0319
853.15		0.2485	0.81393	0.45745	0.99088
854.57		0.24749	0.80866	0.44952	1.021
856		0.23428	0.82108	0.4546	1.0096
857.42		0.26011	0.80654	0.44036	0.96019
858.84		0.25812	0.82014	0.43706	0.92807
860.27		0.2504	0.80128	0.44021	0.98346
861.69		0.24714	0.82058	0.41453	0.98388
863.12		0.25423	0.81531	0.44745	0.98759
864.54		0.24369	0.81159	0.44934	0.99186
865.97		0.25441	0.7898	0.44769	0.97047
867.39		0.25289	0.8173	0.4252	0.93218
868.81		0.25069	0.81327	0.44663	0.97681
870.24		0.24901	0.79913	0.4458	0.98447
871.66		0.25492	0.82189	0.43455	0.98773
873.09		0.25832	0.81114	0.44374	1.0028
874.51		0.2513	0.81204	0.43514	0.98709
875.94		0.24204	0.81135	0.45044	0.99299
877.36		0.24925	0.81662	0.45155	0.9855
878.78		0.24902	0.81074	0.46386	1.0283
880.21		0.24638	0.79685	0.46502	1.0228
881.63		0.2513	0.80358	0.44767	0.99336
883.06		0.24793	0.81482	0.44605	0.99667
884.48		0.23121	0.8105	0.44542	1.0013
885.91		0.24669	0.80968	0.42624	0.96021
887.33		0.254	0.80374	0.45218	1.0067
888.75		0.24761	0.80183	0.43799	1.017
890.18		0.24598	0.81858	0.46199	1.0132
891.6		0.24439	0.81164	0.46509	1.0121
893.03		0.24531	0.81723	0.43956	0.98579
894.45		0.25327	0.80819	0.45947	0.95313
895.88		0.23583	0.81371	0.45347	0.93584
897.3		0.24708	0.80735	0.4454	0.93414
898.72		0.25209	0.80859	0.47103	1.0047
900.15		0.24708	0.81564	0.46231	0.9546
901.57		0.24992	0.81251	0.45392	0.98713
903		0.23795	0.80221	0.4464	1.0249
904.42		0.24932	0.81728	0.47052	0.97763
905.85		0.24697	0.80552	0.44114	1.0384
907.27		0.24709	0.80348	0.44879	1.0372
908.69		0.2596	0.8124	0.44972	1.0101
910.12		0.24929	0.78914	0.46612	1.0179
911.54		0.25588	0.81337	0.44616	0.99579
912.97		0.24682	0.81465	0.45995	0.97863
914.39		0.25434	0.81178	0.45107	1.0002
915.82		0.26142	0.81016	0.43832	0.96553
917.24		0.25644	0.79181	0.44461	0.97158
918.66		0.23122	0.81852	0.45574	0.96666
920.09		0.25519	0.80973	0.45497	1.0372
921.51		0.2349	0.81581	0.43714	1.0028
922.94		0.24909	0.81679	0.45525	0.99954
924.36		0.25367	0.81883	0.4452	0.96957
925.79		0.24339	0.82172	0.44353	1.0033
927.21		0.25445	0.81675	0.44962	1.0085
928.63		0.25707	0.81347	0.45757	0.99306
930.06		0.24288	0.82131	0.46586	1.0001
931.48		0.25645	0.81523	0.45571	0.95681
932.91		0.24993	0.82258	0.44909	0.97172
934.33		0.24758	0.82231	0.46774	0.95029
935.76		0.24976	0.81506	0.46042	0.97744
937.18		0.25053	0.81119	0.45654	1.0213
938.6		0.2451	0.81822	0.44522	0.97649
940.03		0.24041	0.8108	0.45462	1.0088
941.45		0.25114	0.81937	0.46152	0.97968
942.88		0.2502	0.80936	0.45995	1.0298
944.3		0.25216	0.81368	0.47087	0.99575
945.73		0.25825	0.82862	0.47375	1.0388
947.15		0.26698	0.81886	0.45831	0.99577
948.57		0.24691	0.80499	0.45572	1.0008
950		0.24377	0.82112	0.4619	1.0048
951.42		0.24499	0.82385	0.4597	1.008
952.85		0.24833	0.82276	0.45453	0.9937
954.27		0.25229	0.82043	0.46826	0.98799
955.7		0.25805	0.82059	0.46155	0.99709
957.12		0.24122	0.81034	0.4487	0.97116
958.54		0.25726	0.82469	0.4702	0.93783
959.97		0.25337	0.80588	0.46287	0.97279
961.39		0.25501	0.8261	0.47109	1.0031
962.82		0.25728	0.81407	0.44974	0.95695
964.24		0.25645	0.81319	0.48741	0.98935
965.67		0.25145	0.81491	0.47202	1.0229
967.09		0.25158	0.8136	0.48723	0.99586
968.51		0.25066	0.82335	0.4847	0.99658
969.94		0.25709	0.81818	0.46461	1.0162
971.36		0.24475	0.81685	0.47518	1.0087
972.79		0.25352	0.82439	0.47191	0.9643
974.21		0.25084	0.83111	0.48131	0.97035
975.64		0.25291	0.82456	0.46854	0.97192
977.06		0.25719	0.82588	0.47473	1.0032
978.48		0.25484	0.82043	0.45718	0.98993
979.91		0.26314	0.82132	0.46788	1.0098
981.33		0.25758	0.82795	0.46457	1.0216
982.76		0.25307	0.81643	0.47133	1.0206
984.18		0.26029	0.81326	0.46792	1.0299
985.61		0.24598	0.81593	0.48141	1.0065
987.03		0.24794	0.81439	0.4617	1.0287
988.45		0.25351	0.82118	0.45501	1.0092
989.88		0.24071	0.82522	0.46799	1.0007
991.3		0.2637	0.8343	0.46013	1.0078
992.73		0.26493	0.834	0.4685	0.9575
994.15		0.25451	0.83073	0.47521	1.0144
995.58		0.25438	0.83078	0.46747	0.99483
997		0.25431	0.81889	0.48048	0.9807
998.42		0.24276	0.81901	0.4693	0.9844
999.85		0.25662	0.8324	0.48672	1.0245
1001.3		0.24667	0.80418	0.4816	1.0051
1002.7		0.25568	0.83465	0.46134	1.0144
1004.1		0.26185	0.81565	0.47482	0.9847
1005.5		0.24555	0.82886	0.47124	1.0013
1007		0.25897	0.8163	0.48763	0.99535
1008.4		0.24433	0.82146	0.48965	0.95952
1009.8		0.2485	0.82748	0.46816	0.99243
1011.2		0.26268	0.82793	0.48114	1.0157
1012.7		0.25978	0.82724	0.4755	1.0221
1014.1		0.25663	0.83878	0.48808	0.99827
1015.5		0.24121	0.82552	0.46734	1.014
1016.9		0.2609	0.82884	0.48783	1.0425
1018.4		0.24812	0.83067	0.5041	0.95147
1019.8		0.25354	0.82441	0.47152	0.97629
1021.2		0.2586	0.8284	0.46556	0.98222
1022.6		0.25851	0.82622	0.48679	0.96241
1024.1		0.25728	0.83291	0.46525	1.0298
1025.5		0.24595	0.81577	0.47288	1.0069
1026.9		0.25682	0.83751	0.48798	1.0071
1028.3		0.2556	0.81258	0.48771	0.97175
1029.8		0.25384	0.84127	0.47384	1.0339
1031.2		0.25783	0.8276	0.45615	1.0059
1032.6		0.25711	0.83016	0.51455	1.0118
1034		0.24403	0.83271	0.49828	0.9959
1035.5		0.25223	0.82057	0.48178	1.0485
1036.9		0.24831	0.82624	0.46933	1.0116
1038.3		0.25025	0.83801	0.46212	0.98987
1039.7		0.24639	0.81685	0.4782	1.0135
1041.2		0.25726	0.83333	0.47385	1.0344
1042.6		0.24655	0.83703	0.46012	0.98779
1044		0.25611	0.81936	0.49325	1.0363
1045.4		0.26392	0.81322	0.48471	1.0578
1046.8		0.26348	0.82677	0.47317	1.0146
1048.3		0.24297	0.83317	0.49514	0.99897
1049.7		0.25342	0.81934	0.46472	1.015
1051.1		0.23743	0.82215	0.48254	1.0147
1052.5		0.24884	0.82484	0.4952	0.9992
1054		0.25888	0.8321	0.4733	0.98428
1055.4		0.25688	0.83874	0.50136	1.0457
1056.8		0.24361	0.83214	0.47785	1.0148
1058.2		0.25115	0.83684	0.48214	1.0092
1059.7		0.2582	0.8212	0.50962	0.95495
1061.1		0.25811	0.83554	0.46311	1.0339
1062.5		0.25798	0.83835	0.49943	1.0275
1063.9		0.24801	0.83482	0.46513	1.0406
1065.4		0.25391	0.83173	0.50408	0.98221
1066.8		0.2614	0.83779	0.47901	1.001
1068.2		0.24785	0.81754	0.4867	0.989
1069.6		0.25571	0.82355	0.47437	1.0084
1071.1		0.24463	0.82925	0.4935	1.0072
1072.5		0.25578	0.8232	0.47394	1.0482
1073.9		0.25653	0.83052	0.49094	1.0582
1075.3		0.24486	0.82255	0.49387	0.97962
1076.8		0.25567	0.83262	0.50131	1.0389
1078.2		0.24806	0.83832	0.48279	0.9877
1079.6		0.25237	0.83146	0.48988	1.0214
1081		0.26088	0.82936	0.49456	0.99336
1082.5		0.25759	0.8214	0.49567	1.0101
1083.9		0.25854	0.82532	0.49243	1.0207
1085.3		0.2579	0.84394	0.48239	0.9999
1086.7		0.24847	0.8406	0.48711	1.038
1088.2		0.26498	0.81761	0.48897	0.971
1089.6		0.28386	0.82569	0.48815	0.94508
1091		0.25195	0.82697	0.4864	1.0127
1092.4		0.27195	0.83392	0.46495	0.993
1093.9		0.24846	0.81873	0.48811	0.96747
1095.3		0.25155	0.82438	0.49159	1.0303
1096.7		0.24174	0.82911	0.48884	1.0138
1098.1		0.26402	0.83969	0.52361	1.0218
1099.5		0.25442	0.82638	0.47502	1.0454
1101		0.25791	0.83086	0.49532	1.0356
1102.4		0.25995	0.82792	0.48304	1.0161
1103.8		0.25966	0.83403	0.49196	0.98367
1105.2		0.26573	0.84578	0.49005	1.0125
1106.7		0.26561	0.84253	0.51192	1.0324
1108.1		0.26621	0.83852	0.49714	0.98643
1109.5		0.25341	0.8448	0.49442	0.99497
1110.9		0.25356	0.84133	0.5137	0.97067
1112.4		0.25275	0.8537	0.48914	0.97025
1113.8		0.24468	0.83485	0.4871	0.9865
1115.2		0.26025	0.83443	0.4844	1.0563
1116.6		0.26102	0.8403	0.50887	0.98898
1118.1		0.25152	0.8409	0.50249	0.97331
1119.5		0.24813	0.83845	0.50455	0.98274
1120.9		0.25781	0.83484	0.49657	1.0027
1122.3		0.25913	0.83781	0.51458	0.98377
1123.8		0.25404	0.83954	0.49044	1.0234
1125.2		0.25942	0.83374	0.50535	1.0414
1126.6		0.24541	0.83267	0.52289	1.0941
1128		0.24893	0.84075	0.50749	1.0045
1129.5		0.25585	0.82933	0.50362	0.98661
1130.9		0.25346	0.83451	0.50877	1.0556
1132.3		0.26683	0.8321	0.49839	1.0059
1133.7		0.26279	0.8416	0.51376	0.99717
1135.2		0.2553	0.84114	0.49589	1.0095
1136.6		0.25442	0.84508	0.48083	1.0223
1138		0.25658	0.8263	0.50846	1.0321
1139.4		0.26843	0.84274	0.51361	1.0207
1140.9		0.25913	0.83565	0.50868	0.99028
1142.3		0.25704	0.84088	0.5076	1.0153
1143.7		0.25577	0.84818	0.49619	1.0131
1145.1		0.24884	0.853	0.51035	1.0398
1146.5		0.26233	0.83152	0.50861	1.0213
1148		0.26618	0.84499	0.49798	1.037
1149.4		0.27283	0.83733	0.50812	1.018
1150.8		0.2652	0.84354	0.499	1.0206
1152.2		0.26859	0.83731	0.51052	1.0309
1153.7		0.25568	0.83182	0.49058	0.98601
1155.1		0.25401	0.84003	0.51084	1.0099
1156.5		0.26135	0.8393	0.52217	0.99279
1157.9		0.26051	0.84886	0.4915	1.0334
1159.4		0.25673	0.84537	0.48791	0.97299
1160.8		0.25415	0.84185	0.50932	1.0299
1162.2		0.27891	0.84715	0.50512	0.97275
1163.6		0.25991	0.83713	0.50744	1.0118
1165.1		0.26083	0.84311	0.48784	1.0299
1166.5		0.25296	0.83051	0.51281	1.0071
1167.9		0.25577	0.84451	0.49759	0.96488
1169.3		0.27447	0.84005	0.49627	1.062
1170.8		0.26763	0.84535	0.50774	1.0653
1172.2		0.2606	0.84087	0.49731	1.0164
1173.6		0.26653	0.82711	0.51789	1.0713
1175		0.25934	0.83883	0.5209	1.0297
1176.5		0.26711	0.83126	0.51547	1.0355
1177.9		0.24896	0.8405	0.52549	1.0112
1179.3		0.26617	0.83352	0.49466	1.0075
1180.7		0.24985	0.8426	0.49503	1.0088
1182.2		0.25656	0.84476	0.50214	1.0161
1183.6		0.25373	0.85222	0.51637	0.99776
1185		0.26577	0.85011	0.50769	1.0084
1186.4		0.25795	0.83629	0.51829	1.0394
1187.9		0.25171	0.85052	0.4846	0.98633
1189.3		0.25918	0.84133	0.50292	0.99922
1190.7		0.25787	0.85107	0.53131	1.0352
1192.1		0.26954	0.83297	0.49504	1.0429
1193.6		0.2649	0.85463	0.4956	1.0171
1195		0.26635	0.83324	0.51449	1.0339
1196.4		0.26105	0.83765	0.50411	1.0709
1197.8		0.2684	0.85198	0.50213	0.99927
1199.2		0.26448	0.84581	0.49065	0.96997
1200.7		0.25626	0.85765	0.50613	0.97945
1202.1		0.25442	0.82553	0.52105	0.96696
1203.5		0.26279	0.83064	0.51056	1.0187
1204.9		0.25437	0.83043	0.52279	1.04
1206.4		0.25648	0.83561	0.51617	1.0223
1207.8		0.2547	0.85558	0.49368	1.0349
1209.2		0.28121	0.84125	0.50048	1.0566
1210.6		0.25497	0.84644	0.51416	0.99257
1212.1		0.26648	0.84336	0.49801	1.0228
1213.5		0.25658	0.8502	0.5177	1.044
1214.9		0.26174	0.84565	0.52092	1.0337
1216.3		0.26871	0.85478	0.53659	1.0107
1217.8		0.25768	0.84499	0.51893	0.97052
1219.2		0.26582	0.84033	0.51849	1.0115
1220.6		0.27421	0.85478	0.51028	1.032
1222		0.26355	0.84744	0.5034	0.98324
1223.5		0.26455	0.84852	0.54531	1.0855
1224.9		0.26741	0.83239	0.51122	1.0285
1226.3		0.26892	0.85962	0.52152	1.0478
1227.7		0.25737	0.82871	0.48355	1.0448
1229.2		0.25426	0.84722	0.5255	1.0006
1230.6		0.24471	0.82782	0.50424	1.0802
1232		0.25476	0.86237	0.50533	1.0313
1233.4		0.27396	0.84263	0.52654	1.0163
1234.9		0.27142	0.85868	0.50705	1.0049
1236.3		0.27534	0.8613	0.5081	1.0228
1237.7		0.2723	0.85117	0.51263	0.9788
1239.1		0.26574	0.84338	0.48695	1.0301
1240.6		0.25922	0.83447	0.51806	1.0247
1242		0.25348	0.83801	0.53912	0.9692
1243.4		0.27087	0.83876	0.50357	1.0221
1244.8		0.26811	0.84574	0.52725	0.99751
1246.2		0.27767	0.85169	0.53653	1.0251
1247.7		0.24413	0.84147	0.52155	1.0646
1249.1		0.25734	0.85677	0.49672	1.0508
1250.5		0.26347	0.84877	0.52297	1.0089
1251.9		0.25288	0.86851	0.51086	1.055
1253.4		0.26196	0.83777	0.52608	0.97618
1254.8		0.27542	0.85879	0.53385	1.0328
1256.2		0.25631	0.85887	0.52089	0.99891
1257.6		0.2789	0.85161	0.52366	1.0189
1259.1		0.25738	0.84444	0.503	1.0679
1260.5		0.26753	0.83872	0.51193	1.0308
1261.9		0.25598	0.84703	0.53627	1.0388
1263.3		0.26201	0.85079	0.5052	1.0391
1264.8		0.26376	0.84342	0.54668	1.0085
1266.2		0.26936	0.84639	0.51645	1.0309
1267.6		0.26192	0.85697	0.52864	0.98508
1269		0.26412	0.83243	0.52179	1.0132
1270.5		0.26809	0.83961	0.52068	0.98225
1271.9		0.26424	0.83846	0.52107	0.97881
1273.3		0.27169	0.8679	0.51668	1.0358
1274.7		0.26142	0.85964	0.52802	0.98184
1276.2		0.26258	0.85173	0.52441	0.99776
1277.6		0.2587	0.85767	0.53777	0.98623
1279		0.26814	0.85094	0.52743	1.0004
1280.4		0.25861	0.86197	0.51526	0.99845
1281.9		0.26072	0.84659	0.52849	1.027
1283.3		0.27234	0.84983	0.53006	1.0322
1284.7		0.25831	0.85757	0.5129	1.0576
1286.1		0.26519	0.85616	0.51378	1.0886
1287.6		0.26593	0.84331	0.52571	1.0381
1289		0.26328	0.86443	0.50421	1.0857
1290.4		0.26967	0.85821	0.53165	1.0354
1291.8		0.2584	0.86173	0.53894	1.0281
1293.3		0.2567	0.85348	0.52293	1.0201
1294.7		0.25871	0.84581	0.52172	0.98945
1296.1		0.26908	0.83835	0.5417	1.0533
1297.5		0.27099	0.8636	0.56413	1.0489
1298.9		0.25512	0.85201	0.5187	1.0488
1300.4		0.25707	0.85248	0.54654	1.1031
1301.8		0.26099	0.84297	0.53082	1.0476
1303.2		0.26015	0.84892	0.53899	0.98792
1304.6		0.273	0.84232	0.51295	1.0684
1306.1		0.26352	0.83715	0.52802	1.0081
1307.5		0.27371	0.85173	0.53801	1.0163
1308.9		0.26707	0.85346	0.51477	1.0499
1310.3		0.26726	0.85304	0.52285	1.0267
1311.8		0.26935	0.85023	0.53221	1.0814
1313.2		0.27738	0.85628	0.52438	1.023
1314.6		0.26865	0.85087	0.53096	1.0107
1316		0.28084	0.85751	0.53806	1.0592
1317.5		0.27317	0.85105	0.5418	1.0245
1318.9		0.26341	0.85072	0.52027	0.98317
1320.3		0.25983	0.83377	0.5342	1.0325
1321.7		0.26093	0.84823	0.52812	1.0623
1323.2		0.26333	0.85341	0.51957	1.0339
1324.6		0.26951	0.84913	0.54092	1.0358
1326		0.27506	0.84695	0.52658	1.0386
1327.4		0.26486	0.85859	0.52881	1.0267
1328.9		0.27171	0.86865	0.54691	1.0495
1330.3		0.26601	0.85006	0.52106	1.0557
1331.7		0.26712	0.85247	0.54214	1.0536
1333.1		0.26564	0.85158	0.53707	1.0103
1334.6		0.2637	0.84591	0.53416	0.97849
1336		0.26182	0.8588	0.5199	1.036
1337.4		0.26857	0.84453	0.52702	1.0535
1338.8		0.26565	0.8614	0.54009	1.0524
1340.3		0.26133	0.84741	0.51988	1.0123
1341.7		0.26517	0.86671	0.53966	1.0192
1343.1		0.27014	0.84323	0.53532	1.0378
1344.5				0.52312
1345.9				0.52445
1347.4				0.5343
1348.8				0.52913
1350.2				0.549
1351.6				0.51865
1353.1				0.54039
1354.5				0.53082
1355.9				0.5509
1357.3				0.54593
1358.8				0.53458
1360.2				0.53567
1361.6				0.55752
1363				0.54936
1364.5				0.55569
1365.9				0.52377
1367.3				0.53114
1368.7				0.55256
1370.2				0.52194
1371.6				0.52055
1373				0.54154
1374.4				0.5492
1375.9				0.55149
1377.3				0.5646
1378.7				0.53588
1380.1				0.53712
1381.6				0.54092
1383				0.53409
1384.4				0.54627
1385.8				0.54147
1387.3				0.54052
1388.7				0.55566
1390.1				0.55055
1391.5				0.54269
1393				0.55914
1394.4				0.55321
1395.8				0.55119
1397.2				0.53833
1398.6				0.54988
1400.1				0.55485
1401.5				0.54443
1402.9				0.54742
1404.3				0.5818
1405.8				0.55211
1407.2				0.50892
1408.6				0.54896
1410				0.5522
1411.5				0.53781
1412.9				0.56263
1414.3				0.53923
1415.7				0.55704
1417.2				0.53306
1418.6				0.55141
1420				0.55112
1421.4				0.55586
1422.9				0.53875
1424.3				0.56007
1425.7				0.55005
1427.1				0.54643
1428.6				0.53217
1430				0.55809
1431.4				0.54899
1432.8				0.55173
1434.3				0.546
1435.7				0.54912
1437.1				0.56142
1438.5				0.53001
1440				0.56735
1441.4				0.53004
1442.8				0.56662
1444.2				0.55214
1445.6				0.54747
1447.1				0.53649
1448.5				0.56312
1449.9				0.52997
1451.3				0.56863
1452.8				0.55305
1454.2				0.54316
1455.6				0.55865
1457				0.54797
1458.5				0.55783
1459.9				0.55503
1461.3				0.57871
1462.7				0.55502
1464.2				0.5758
1465.6				0.55928
1467				0.5473
1468.4				0.55082
1469.9				0.55242
1471.3				0.58393
1472.7				0.5425
1474.1				0.5467
1475.6				0.55855
1477				0.55838
1478.4				0.56131
1479.8				0.53089
1481.3				0.5449
1482.7				0.55692
1484.1				0.53431
1485.5				0.56559
1487				0.57083
1488.4				0.56214
1489.8				0.55742
1491.2				0.54658
1492.7				0.56679
1494.1				0.5453
1495.5				0.56417
1496.9				0.55903
1498.3				0.54758
1499.8				0.54668
1501.2				0.54949
1502.6				0.55167
1504				0.56167
1505.5				0.55903
1506.9				0.55411
1508.3				0.55263
1509.7				0.56
1511.2				0.56947
1512.6				0.54639
1514				0.56887
1515.4				0.56241
1516.9				0.57168
1518.3				0.55047
1519.7				0.56655
1521.1				0.54244
1522.6				0.56197
1524				0.54941
1525.4				0.56127
1526.8				0.57816
1528.3				0.55564
1529.7				0.5664
1531.1				0.56623
1532.5				0.5564
1534				0.59216
1535.4				0.58848
1536.8				0.55715
1538.2				0.55882
1539.7				0.59075
1541.1				0.57238
1542.5				0.55251
1543.9				0.5792
1545.3				0.55325
1546.8				0.57936
1548.2				0.56068
1549.6				0.56756
1551				0.54453
1552.5				0.56642
1553.9				0.57276
1555.3				0.57322
1556.7				0.55717
1558.2				0.55527
1559.6				0.5649
1561				0.57386
1562.4				0.55909
1563.9				0.56546
1565.3				0.59041
1566.7				0.56085
1568.1				0.56565
1569.6				0.56831
1571				0.56335
1572.4				0.57463
1573.8				0.56749
1575.3				0.57871
1576.7				0.54352
1578.1				0.55573
1579.5				0.57201
1581				0.57537
1582.4				0.56361
1583.8				0.58881
1585.2				0.58737
1586.7				0.55573
1588.1				0.57552
1589.5				0.59186
1590.9				0.58422
1592.4				0.56836
1593.8				0.56868
1595.2				0.58849
1596.6				0.56801
1598				0.57347
1599.5				0.57288
1600.9				0.58025
1602.3				0.59073
1603.7				0.55596
1605.2				0.56403
1606.6				0.5625
1608				0.58159
1609.4				0.56377
1610.9				0.60393
1612.3				0.58421
1613.7				0.58998
1615.1				0.57788
1616.6				0.5679
1618				0.58971
1619.4				0.59128
1620.8				0.57726
1622.3				0.57936
1623.7				0.58293
1625.1				0.58804
1626.5				0.55699
1628				0.58365
1629.4				0.57496
1630.8				0.57585
1632.2				0.57584
1633.7				0.59741
1635.1				0.59948
1636.5				0.58081
1637.9				0.58928
1639.4				0.58169
1640.8				0.5822
1642.2				0.57439
1643.6				0.57938
1645				0.59225
1646.5				0.58716
1647.9				0.57808
1649.3				0.59266
1650.7				0.55317
1652.2				0.57153
1653.6				0.59862
1655				0.58181
1656.4				0.55854
1657.9				0.55539
1659.3				0.59636
1660.7				0.57648
1662.1				0.58736
1663.6				0.56318
1665				0.58804
1666.4				0.56888
1667.8				0.56375
1669.3				0.5957
1670.7				0.59653
1672.1				0.56259
1673.5				0.58785
1675				0.58141
1676.4				0.60217
1677.8				0.57851
1679.2				0.57348
1680.7				0.60814
1682.1				0.5978
1683.5				0.5976
1684.9				0.57458
1686.4				0.5952
1687.8				0.60353
1689.2				0.58698
1690.6				0.59746
1692.1				0.58749
1693.5				0.58373
1694.9				0.58711
1696.3				0.57333
1697.7				0.5623
1699.2				0.59181
1700.6				0.57165
1702				0.60739
1703.4				0.57349
1704.9				0.60224
1706.3				0.58577
1707.7				0.59685
1709.1				0.5993
1710.6				0.58373
1712				0.58747
1713.4				0.57088
1714.8				0.60952
1716.3				0.57747
1717.7				0.58758
1719.1				0.60843
1720.5				0.59154
1722				0.57821
1723.4				0.57678
1724.8				0.58241
1726.2				0.57341
1727.7				0.62286
1729.1				0.60489
1730.5				0.5773
1731.9				0.59311
1733.4				0.58804
1734.8				0.59733
1736.2				0.60719
1737.6				0.59724
1739.1				0.61104
1740.5				0.59836
1741.9				0.60231
1743.3				0.58766
1744.7				0.59287
1746.2				0.60032
1747.6				0.58963
1749				0.60371
1750.4				0.62401
1751.9				0.58561
1753.3				0.58153
1754.7				0.58902
1756.1				0.58921
1757.6				0.6188
1759				0.59529
1760.4				0.60041
1761.8				0.592
1763.3				0.58573
1764.7				0.5738
1766.1				0.59437
1767.5				0.57726
1769				0.58751
1770.4				0.60184
1771.8				0.61542
1773.2				0.5801
1774.7				0.60321
1776.1				0.59422
1777.5				0.58775
1778.9				0.6058
1780.4				0.58825
1781.8				0.60091
1783.2				0.6061
1784.6				0.60669
1786.1				0.57697
1787.5				0.58525
1788.9				0.60361
1790.3				0.59493
1791.8				0.60119
1793.2				0.59161
1794.6				0.60744
1796				0.61723
1797.4				0.60134
1798.9				0.59708
1800.3				0.59399
1801.7				0.61587
1803.1				0.60602
1804.6				0.61304
1806				0.59625
1807.4				0.60944
1808.8				0.5833
1810.3				0.61566
1811.7				0.61542
1813.1				0.59909
1814.5				0.60031
1816				0.58528
1817.4				0.60629
1818.8				0.58781
1820.2				0.62021
1821.7				0.59785
1823.1				0.61077
1824.5				0.61711
1825.9				0.6002
1827.4				0.62663
1828.8				0.6186
1830.2				0.59995
1831.6				0.61074
1833.1				0.59374
1834.5				0.63029
1835.9				0.59572
1837.3				0.60453
1838.8				0.59391
1840.2				0.59327
1841.6				0.59223
1843				0.60478
1844.4				0.63531
1845.9				0.60623
1847.3				0.60934
1848.7				0.60357
1850.1				0.59128
1851.6				0.59858
1853				0.60609
1854.4				0.59783
1855.8				0.59907
1857.3				0.61599
1858.7				0.61191
1860.1				0.61926
1861.5				0.59679
1863				0.5859
1864.4				0.59556
1865.8				0.63884
1867.2				0.60078
1868.7				0.6083
1870.1				0.60015
1871.5				0.6182
1872.9				0.61525
1874.4				0.61658
1875.8				0.59122
1877.2				0.63043
1878.6				0.6163
1880.1				0.6004
1881.5				0.60624
1882.9				0.62699
1884.3				0.63924
1885.8				0.63601
1887.2				0.62655
1888.6				0.62833
1890				0.61338
1891.5				0.61806
1892.9				0.61782
1894.3				0.61241
1895.7				0.59977
1897.1				0.60063
1898.6				0.59849
1900				0.59948
1901.4				0.64094
1902.8				0.62386
1904.3				0.61829
1905.7				0.61177
1907.1				0.61661
1908.5				0.62641
1910				0.60867
1911.4				0.60257
1912.8				0.6159
1914.2				0.63678
1915.7				0.60315
1917.1				0.61323
1918.5				0.62506
1919.9				0.61369
1921.4				0.61029
1922.8				0.60807
1924.2				0.60958
1925.6				0.60144
1927.1				0.61195
1928.5				0.61369
1929.9				0.61027
1931.3				0.62354
1932.8				0.61486
1934.2				0.63141
1935.6				0.61003
1937				0.61454
1938.5				0.60449
1939.9				0.61493
1941.3				0.60715
1942.7				0.61846
1944.1				0.61458
1945.6				0.61823
1947				0.61976
1948.4				0.62339
1949.8				0.63139
1951.3				0.62801
1952.7				0.6087
1954.1				0.61319
1955.5				0.59767
1957				0.61268
1958.4				0.61858
1959.8				0.61208
1961.2				0.61553
1962.7				0.62504
1964.1				0.62062
1965.5				0.62004
1966.9				0.6323
1968.4				0.59781
1969.8				0.63224
1971.2				0.6179
1972.6				0.63502
1974.1				0.61695
1975.5				0.62862
1976.9				0.61718
1978.3				0.63276
1979.8				0.62783
1981.2				0.61235
1982.6				0.6217
1984				0.62553
1985.5				0.64214
1986.9				0.62977
1988.3				0.63549
1989.7				0.61507
1991.2				0.62004
1992.6				0.60711
1994				0.61314
1995.4				0.621
1996.8				0.62646
1998.3				0.62161
1999.7				0.66576
2001.1				0.62331
2002.5				0.60864
2004				0.64825
2005.4				0.62069
2006.8				0.62845
2008.2				0.63127
2009.7				0.61724
2011.1				0.60801
2012.5				0.63522
2013.9				0.62255
2015.4				0.62971
2016.8				0.6156
2018.2				0.6199
2019.6				0.63769
2021.1				0.64191
2022.5				0.60381
2023.9				0.60767
2025.3				0.60413
2026.8				0.61401
2028.2				0.63609
2029.6				0.61864
2031				0.62129
2032.5				0.641
2033.9				0.64548
2035.3				0.60713
2036.7				0.62796
2038.2				0.64117
2039.6				0.63834
2041				0.61121
2042.4				0.6399
2043.8				0.62223
2045.3				0.6528
2046.7				0.62399
2048.1				0.63876
2049.5				0.61983
2051				0.64983
2052.4				0.62244
2053.8				0.6086
2055.2				0.63516
2056.7				0.65947
2058.1				0.62393
2059.5				0.63256
2060.9				0.61392
2062.4				0.61928
2063.8				0.63752
2065.2				0.65078
2066.6				0.63435
2068.1				0.64777
2069.5				0.61516
2070.9				0.61176
2072.3				0.61701
2073.8				0.63414
2075.2				0.63726
2076.6				0.63632
2078				0.61619
2079.5				0.6453
2080.9				0.62872
2082.3				0.61091
2083.7				0.62863
2085.2				0.62397
2086.6				0.6154
2088				0.63416
2089.4				0.61914
2090.9				0.61241
2092.3				0.6425
2093.7				0.63315
2095.1				0.64164
2096.5				0.64073
2098				0.63664
2099.4				0.6413
2100.8				0.63901
2102.2				0.62746
2103.7				0.61889
2105.1				0.62669
2106.5				0.6328
2107.9				0.63861
2109.4				0.63059
2110.8				0.60615
2112.2				0.64435
2113.6				0.64376
2115.1				0.62349
2116.5				0.64048
2117.9				0.64753
2119.3				0.63129
2120.8				0.62634
2122.2				0.62563
2123.6				0.6223
2125				0.63694
2126.5				0.63677
2127.9				0.6315
2129.3				0.6033
2130.7				0.63638
2132.2				0.63937
2133.6				0.64423
2135				0.63185
2136.4				0.63315
2137.9				0.63547
2139.3				0.64629
2140.7				0.65748
2142.1				0.63828
2143.5				0.63803
2145				0.65309
2146.4				0.63531
2147.8				0.67201
2149.2				0.63437
2150.7				0.64479
2152.1				0.64622
2153.5				0.64598
2154.9				0.6596
2156.4				0.62943
2157.8				0.63461
2159.2				0.63478
2160.6				0.64019
2162.1				0.65482
2163.5				0.64209
2164.9				0.62523
2166.3				0.63453
2167.8				0.65066
2169.2				0.65249
2170.6				0.63625
2172				0.63037
2173.5				0.62731
2174.9				0.62821
2176.3				0.65054
2177.7				0.65163
2179.2				0.65916
2180.6				0.63382
2182				0.63348
2183.4				0.64387
2184.9				0.65126
2186.3				0.66774
2187.7				0.63087
2189.1				0.6531
2190.6				0.6419
2192				0.62714
2193.4				0.65145
2194.8				0.66678
2196.2				0.66327
2197.7				0.65088
2199.1				0.63655
2200.5				0.65394
2201.9				0.64964
2203.4				0.64988
2204.8				0.64632
2206.2				0.64672
2207.6				0.65155
2209.1				0.66311
2210.5				0.64571
2211.9				0.648
2213.3				0.62381
2214.8				0.65915
2216.2				0.65196
2217.6				0.63656
2219				0.64142
2220.5				0.65144
2221.9				0.62879
2223.3				0.66062
2224.7				0.6464
2226.2				0.62715
2227.6				0.65003
2229				0.6471
2230.4				0.64821
2231.9				0.65976
2233.3				0.66217
2234.7				0.65549
2236.1				0.66168
2237.6				0.62892
2239				0.64993
2240.4				0.65794
2241.8				0.62962
2243.2				0.64854
2244.7				0.62912
2246.1				0.62556
2247.5				0.66468
2248.9				0.65957
2250.4				0.65788
2251.8				0.68314
2253.2				0.65174
2254.6				0.62155
2256.1				0.64743
2257.5				0.64597
2258.9				0.65302
2260.3				0.63995
2261.8				0.65858
2263.2				0.65103
2264.6				0.62423
2266				0.65052
2267.5				0.64559
2268.9				0.65071
2270.3				0.6576
2271.7				0.63914
2273.2				0.65674
2274.6				0.65486
2276				0.64495
2277.4				0.61424
2278.9				0.6762
2280.3				0.66709
2281.7				0.64556
2283.1				0.64325
2284.6				0.65334
2286				0.634
2287.4				0.64451
2288.8				0.65444
2290.2				0.6441
2291.7				0.64874
2293.1				0.66664
2294.5				0.66546
2295.9				0.65635
2297.4				0.64269
2298.8				0.64885
2300.2				0.66834
2301.6				0.65297
2303.1				0.67428
2304.5				0.66411
2305.9				0.65346
2307.3				0.65245
2308.8				0.68114
2310.2				0.63679
2311.6				0.62696
2313				0.64418
2314.5				0.66564
2315.9				0.65387
2317.3				0.64555
2318.7				0.67131
2320.2				0.65032
2321.6				0.66514
2323				0.64974
2324.4				0.64901
2325.9				0.66695
2327.3				0.6757
2328.7				0.64501
2330.1				0.64781
2331.6				0.65303
2333				0.65115
2334.4				0.6734
2335.8				0.67882
2337.3				0.68683
2338.7				0.65811
2340.1				0.67479
2341.5				0.67335
2342.9				0.64793
2344.4				0.66007
2345.8				0.65784
2347.2				0.65158
2348.6				0.63787
2350.1				0.65283
2351.5				0.65925
2352.9				0.64083
2354.3				0.64971
2355.8				0.67076
2357.2				0.65854
2358.6				0.65696
2360				0.66991
2361.5				0.68678
2362.9				0.64014
2364.3				0.66234
2365.7				0.64395
2367.2				0.66512
2368.6				0.65259
2370				0.65777
2371.4				0.66528
2372.9				0.68945
2374.3				0.65549
2375.7				0.67004
2377.1				0.65298
2378.6				0.65402
2380				0.67087
2381.4				0.67189
2382.8				0.67074
2384.3				0.66858
2385.7				0.67868
2387.1				0.64882
2388.5				0.67194
2389.9				0.65915
2391.4				0.68294
2392.8				0.66934
2394.2				0.67008
2395.6				0.66505
2397.1				0.66272
2398.5				0.66709
2399.9				0.65596
2401.3				0.69347
2402.8				0.65352
2404.2				0.65763
2405.6				0.65186
2407				0.67583
2408.5				0.67976
2409.9				0.66253
2411.3				0.66728
2412.7				0.63979
2414.2				0.65221
2415.6				0.67201
2417				0.65073
2418.4				0.67778
2419.9				0.6737
2421.3				0.68974
2422.7				0.67207
2424.1				0.65125
2425.6				0.66011
2427				0.68184
2428.4				0.67252
2429.8				0.65449
2431.3				0.65726
2432.7				0.6646
2434.1				0.65381
2435.5				0.6786
2437				0.69001
2438.4				0.6713
2439.8				0.6679
2441.2				0.68749
2442.6				0.67164
2444.1				0.66079
2445.5				0.67695
2446.9				0.69517
2448.3				0.68235
2449.8				0.68001
2451.2				0.67827
2452.6				0.67109
2454				0.66257
2455.5				0.6594
2456.9				0.67411
2458.3				0.66119
2459.7				0.67126
2461.2				0.67224
2462.6				0.66093
2464				0.67376
2465.4				0.66005
2466.9				0.66814
2468.3				0.67399
2469.7				0.67618
2471.1				0.6751
2472.6				0.68436
2474				0.67893
2475.4				0.66495
2476.8				0.65829
2478.3				0.69158
2479.7				0.68248
2481.1				0.69608
2482.5				0.6873
2484				0.66169
2485.4				0.6716
2486.8				0.68406
2488.2				0.70725
2489.6				0.66281
2491.1				0.65034
2492.5				0.67232
2493.9				0.65087
2495.3				0.66654
2496.8				0.65444
2498.2				0.64202
2499.6				0.65986
2501				0.65389
2502.5				0.67212
2503.9				0.66567
2505.3				0.67888
2506.7				0.68695
2508.2				0.67875
2509.6				0.6834
2511				0.6663
2512.4				0.68947
2513.9				0.66284
2515.3				0.69228
2516.7				0.68335
2518.1				0.65577
2519.6				0.6573
2521				0.6381
2522.4				0.66951
2523.8				0.67571
2525.3				0.67597
2526.7				0.70485
2528.1				0.68314
2529.5				0.66979
2531				0.68463
2532.4				0.68543
2533.8				0.69697
2535.2				0.65887
2536.7				0.67755
2538.1				0.6893
2539.5				0.69842
2540.9				0.69218
2542.3				0.68566
2543.8				0.69799
2545.2				0.68969
2546.6				0.68217
2548				0.65992
2549.5				0.68761
2550.9				0.67546
2552.3				0.65315
2553.7				0.67673
2555.2				0.69454
2556.6				0.68413
2558				0.67266
2559.4				0.69003
2560.9				0.69773
2562.3				0.68827
2563.7				0.66294
2565.1				0.65973
2566.6				0.66666
2568				0.68942
2569.4				0.68091
2570.8				0.66986
2572.3				0.63979
2573.7				0.67052
2575.1				0.69486
2576.5				0.68509
2578				0.68256
2579.4				0.68501
2580.8				0.68443
2582.2				0.67532
2583.7				0.66525
2585.1				0.68118
2586.5				0.69591
2587.9				0.67927
2589.3				0.70135
2590.8				0.69211
2592.2				0.66857
2593.6				0.68121
2595				0.66536
2596.5				0.68547
2597.9				0.68955
2599.3				0.68523
2600.7				0.66949
2602.2				0.6673
2603.6				0.69412
2605				0.67071
2606.4				0.70658
2607.9				0.67501
2609.3				0.67004
2610.7				0.66937
2612.1				0.69375
2613.6				0.69394
2615				0.68937
2616.4				0.71043
2617.8				0.69471
2619.3				0.69158
2620.7				0.70235
2622.1				0.70409
2623.5				0.67496
2625				0.67854
2626.4				0.67857
2627.8				0.70083
2629.2				0.67753
2630.7				0.66414
2632.1				0.68631
2633.5				0.6781
2634.9				0.68747
2636.4				0.67166
2637.8				0.68967
2639.2				0.70038
2640.6				0.67392
2642				0.71266
2643.5				0.67356
2644.9				0.67405
2646.3				0.677
2647.7				0.68425
2649.2				0.68804
2650.6				0.67905
2652				0.66888
2653.4				0.67064
2654.9				0.68655
2656.3				0.6911
2657.7				0.68269
2659.1				0.67046
2660.6				0.68126
2662				0.67698
2663.4				0.6979
2664.8				0.68242
2666.3				0.68041
2667.7				0.6831
2669.1				0.68056
2670.5				0.69626
2672				0.67738
2673.4				0.70185
2674.8				0.71365
2676.2				0.66982
2677.7				0.66097
2679.1				0.6806
2680.5				0.6778
2681.9				0.68802
2683.4				0.66911
2684.8				0.69614
2686.2				0.68692
2687.6				0.69248
2689				0.70205
2690.5				0.65467
2691.9				0.6962
2693.3				0.69469
2694.7				0.66801
2696.2				0.70017
2697.6				0.69778
2699				0.69969
2700.4				0.68088
2701.9				0.66098
2703.3				0.69755
2704.7				0.66809
2706.1				0.69403
2707.6				0.67573
2709				0.70963
2710.4				0.68878
2711.8				0.68729
2713.3				0.68587
2714.7				0.70379
2716.1				0.68422
2717.5				0.65928
2719				0.69888
2720.4				0.70931
2721.8				0.68552
2723.2				0.71615
2724.7				0.69871
2726.1				0.69851
2727.5				0.69958
2728.9				0.70016
2730.4				0.68056
2731.8				0.67562
2733.2				0.70611
2734.6				0.68036
2736.1				0.69069
2737.5				0.69386
2738.9				0.69017
2740.3				0.68788
2741.7				0.67703
2743.2				0.69484
2744.6				0.67344
2746				0.69753
2747.4				0.72592
2748.9				0.6945
2750.3				0.7156
2751.7				0.69054
2753.1				0.70126
2754.6				0.71121
2756				0.70616
2757.4				0.70171
2758.8				0.68976
2760.3				0.69885
2761.7				0.67874
2763.1				0.6617
2764.5				0.70052
2766				0.70392
2767.4				0.68168
2768.8				0.69428
2770.2				0.70997
2771.7				0.67188
2773.1				0.68042
2774.5				0.68207
2775.9				0.66324
2777.4				0.70194
2778.8				0.68052
2780.2				0.69757
2781.6				0.71378
2783.1				0.6944
2784.5				0.69307
2785.9				0.69472
2787.3				0.70832
2788.7				0.69043
2790.2				0.68657
2791.6				0.67658
2793				0.70801
2794.4				0.69793
2795.9				0.70465
2797.3				0.6938
2798.7				0.70504
2800.1				0.67531
2801.6				0.69405
2803				0.70395
2804.4				0.68668
2805.8				0.68975
2807.3				0.68223
2808.7				0.70083
2810.1				0.68382
2811.5				0.70863
2813				0.70459
2814.4				0.71147
2815.8				0.68822
2817.2				0.69398
2818.7				0.68774
2820.1				0.72384
2821.5				0.67335
2822.9				0.70338
2824.4				0.69016
2825.8				0.69201
2827.2				0.69949
2828.6				0.70075
2830.1				0.70844
2831.5				0.7029
2832.9				0.71135
[truncated: 2,955 more rows]

## Sheet: Figure 4B
Individual Dconfocal (um2s-1)
DMEM Media	BSA (50mg/mL)	Cytoplasm	Hela extract
3.425	26.552	0.57497	10.921			GSK3 inhib. Comparisons
3.6459	18.977	0.67459	10.616
4.7439	19.412	0.74647	19.939
3.4665	23.389	0.51701	9.8169
4.8203	22.674	0.52644	6.329
5.1949	20.446	0.67213	8.1699
2.942	18.114	0.52952	12.477
5.7553	18.586	0.5872	12.908
4.9339	26.474	0.94583	6.6722
4.4222	14.273	0.73022	25.421
5.4454	23.345	1.1525	9.8373
6.1109	28.858	0.74866	12.633
2.5141	25.929	0.32243	9.3502
2.0941	20.105	0.66138	11.606
4.8575	16.71	0.99233	14.101
6.2833	16.622	0.56742	10.669
5.6191	19.053	0.68995	11.31
1.4584	19.027	0.73092	12.907
4.4002	25.9	0.53283	11.756
4.7422	29.147		14.242
3.0624	21.013		13.582
1.6468	20.649		16.204
	24.029		10.897
	20.838		10.342
	20.566		11.762
	25.675		11.249
	19.481		12.817
	19.009		10.744
	24.466		8.0627
	17.676		12.297

## Sheet: Figure 4C
	Combined Dconfocal (um2s-1)	Standard Error	Percentage error
DMEM Media	4	0.247468	6.20367
BSA (50mg/mL)	21.4	0.537865	2.2143			GSK3 inhib. Comparisons
Cytoplasm	0.61208	0.0337654	5.51647
Hela extract	11.3	0.671157	5.95325
