# Supplementary material for: Reversing protonation of weakly basic drugs greatly enhances intracellular diffusion and decreases lysosomal sequestration
Source: eLife. 2024 Dec 6;13:RP97255. doi: 10.7554/eLife.97255 (PMC11623935; doi:10.7554/eLife.97255)
Supplement: Figure 5—figure supplement 1—source data 1. [file elife-97255-fig5-figsupp1-data1.xlsx]

## Sheet: F5-FS1-A
Time (ms)	1st run	2nd run	3 run		Individual FRAP Runs-3 demos
0	179.5	308	261.8		Quinacrine in cytoplasm
1.4243	103.4	361.6	400.2
2.8486	233.9	274.9	464.2
4.2729	115.8	295.8	497.4
5.6971	194.1	308.3	520.1
7.1214	199.8	337.1	339.8
8.5457	239.1	328.2	565.4
9.97	144.9	405.7	547.9
11.394	202.8	431.8	497.4
12.819	232.2	392.1	525.6
14.243	160.2	356.2	386.9
15.667	228.1	363.8	513.8
17.091	151.4	389.6	518.7
18.516	190.7	468	448.5
19.94	185.9	387.8	424.7
21.364	194.1	381.1	564.3
22.789	203	434.7	513.7
24.213	148.8	542.4	698
25.637	139.5	442.9	447.3
27.061	217.6	492.6	430.8
28.486	183.1	436.4	552.7
29.91	241.3	556.5	599.4
31.334	223.2	454.3	464.9
32.759	193.2	513.9	465.6
34.183	192	425.6	654
35.607	280.5	541.5	516.6
37.031	264.5	421.4	590.5
38.456	210.2	549.3	556.4
39.88	199.2	539	695.4
41.304	422.1	461.5	584.2
42.729	177.3	522.9	519.9
44.153	258.8	554.2	592.1
45.577	186.7	473.7	626.8
47.001	358	530.2	547.8
48.426	198.5	524.6	598
49.85	243.1	605	778.5
51.274	219	492.7	716.1
52.699	216.6	428.2	483.9
54.123	233.8	747.1	666.3
55.547	198.6	845.4	553.7
56.971	292.8	521.6	575.6
58.396	305.3	559.4	585.1
59.82	350.2	725.8	532.4
61.244	207.2	640.4	565.1
62.669	279	695.6	630.1
64.093	277.9	522.8	670.5
65.517	339.1	629.2	578.7
66.941	294.3	700.6	652.6
68.366	324.5	570.2	821.6
69.79	287.8	461.6	826.5
71.214	306.4	598.5	649.1
72.639	311.5	434.6	513.5
74.063	267.1	752.3	685.4
75.487	342	642.3	567
76.911	278.2	554.5	608.6
78.336	329.6	606.2	702.7
79.76	287.2	504.4	732.6
81.184	204.8	503	503.2
82.609	373.6	564.9	677.2
84.033	332.9	599.3	615
85.457	343	655.5	772.7
86.881	226.9	532.3	708.2
88.306	321.7	621.3	672.2
89.73	305.6	646.6	509.1
91.154	277.5	721.7	710.9
92.579	227.8	698.8	626.2
94.003	379.5	573.1	706.7
95.427	368.5	699.4	624.9
96.851	315.6	596	679.3
98.276	455.5	636	547.7
99.7	253.3	801.7	700.8
101.12	296.5	841.5	657.8
102.55	263.2	772.7	724
103.97	397.9	786.4	638.4
105.4	318.7	748.5	765.5
106.82	329.9	787.3	773.5
108.25	492.9	709.5	672.5
109.67	366.8	621.3	660.7
111.09	342.9	566.7	550.3
112.52	341.8	745.9	559.1
113.94	368.3	590.2	790.8
115.37	341.1	603.8	686.7
116.79	465	638.5	733.5
118.22	461.1	874.7	710.2
119.64	324.4	656	625.9
121.06	275.3	763.7	668.7
122.49	413.8	710.1	800.3
123.91	338.5	603.7	556
125.34	256.7	657.1	680.3
126.76	288.8	715.7	676.4
128.19	401.2	879.5	610.1
129.61	407.3	560.7	707.4
131.03	333.2	550.3	773.1
132.46	441.6	646.6	807
133.88	392	522.3	658.3
135.31	465.3	561.8	665.4
136.73	369.4	683.7	723.1
138.16	344.6	663.9	680.7
139.58	406.3	816.3	761.8
141	370.4	722.4	693.2
142.43	393.4	637.1	681.2
143.85	350.8	782.9	788.7
145.28	346.2	798.3	598.9
146.7	374.7	857.7	743.5
148.13	297.1	866.1	703
149.55	293.8	674.5	531.8
150.97	380.2	643.7	688.8
152.4	325.9	785.1	694.1
153.82	352.2	777.7	778.1
155.25	369.3	769.1	813.1
156.67	356.2	713	700.5
158.1	495.3	700	679.7
159.52	436.2	691.7	697.9
160.94	451.4	622	925.4
162.37	346.2	721.3	864.7
163.79	395.7	686.8	825.2
165.22	411.9	934.8	796.7
166.64	532.5	863.1	774.5
168.07	622.7	788.1	869.4
169.49	529.6	799.1	751.6
170.91	375	784.3	745.2
172.34	394.4	864.1	651.2
173.76	352	788.1	723
175.19	411.3	757.5	817.3
176.61	442.8	727.4	760.2
178.04	428.5	865.7	826.3
179.46	472.9	809.2	643.6
180.88	439.3	800	666.2
182.31	509.9	758.9	926.9
183.73	321.3	677.3	699.3
185.16	439.9	846.9	817.9
186.58	392.8	907	630.7
188.01	484.3	717.8	781.7
189.43	510.5	904.7	779.4
190.85	481.1	700.9	839.4
192.28	510.3	870.2	856.7
193.7	436.5	863.3	885.6
195.13	461.5	726.7	764
196.55	404.7	746.2	722.9
197.98	484.7	789.7	852.8
199.4	516.9	727.5	886.9
200.82	371.3	830.3	832.4
202.25	316.5	842.9	641.8
203.67	436.2	671.5	895.3
205.1	463.3	977.3	951.5
206.52	454.4	719.8	674.6
207.95	422.6	755	726.1
209.37	426	733.3	783.6
210.79	471.5	821.2	799.7
212.22	533.5	698.3	744.2
213.64	489.7	978.1	824.7
215.07	433	730.5	677.3
216.49	606.5	819.4	863.2
217.92	333.9	767.1	783
219.34	415.7	789.7	920.3
220.76	357	916.7	830.8
222.19	664	828.2	993.1
223.61	424.4	964.1	831.3
225.04	562.5	670.9	725.2
226.46	505.4	842.6	834.8
227.89	524	687	708.8
229.31	425.2	827.5	714.5
230.73	484.6	931.9	730.5
232.16	420.4	824.6	694.2
233.58	446.1	803.7	1000.1
235.01	536.7	800.1	763.3
236.43	585	696	877.1
237.86	487.1	749.3	903.2
239.28	554.7	770.6	800
240.7	613	791.9	894.7
242.13	470	851.3	729.1
243.55	495.8	879.7	758.8
244.98	654.3	833	730
246.4	497.2	863.3	637.2
247.83	408.2	913.3	710.2
249.25	635.2	934.4	893.1
250.67	573.7	857.6	874.9
252.1	569	692.3	827.7
253.52	563.4	1037.8	824.5
254.95	576.4	888.5	948.5
256.37	394.9	731.9	904.4
257.8	438	680.4	937.4
259.22	548	939.1	823.8
260.64	583.7	800.9	925.2
262.07	526.2	750.2	868.2
263.49	549.8	820	773.5
264.92	337.8	868.9	764.5
266.34	643	915.6	756.9
267.77	417.3	1091.7	880.5
269.19	545.4	759.5	709.6
270.61	663	979.6	660.9
272.04	515.3	999	812
273.46	543.9	841.7	820.8
274.89	548.7	906.1	833.1
276.31	709.4	817.6	805.1
277.74	608.7	872.4	1020.1
279.16	599.2	930.5	670.9
280.58	719.5	778.7	944.8
282.01	566.7	876.6	818.9
283.43	460	710.8	808.3
284.86	450.2	731.5	899.3
286.28	604.7	969.5	779.4
287.71	490.1	878.8	813
289.13	490	1020	912.7
290.55	553.4	869.9	925.5
291.98	553.4	805.9	909.1
293.4	573.3	959.3	1039.8
294.83	520.8	1101.7	807.6
296.25	518.7	909.4	949.8
297.68	490.1	1028	891.9
299.1	380.1	1018.4	956.1
300.52	561.3	920.5	1055.6
301.95	501	903.1	841.7
303.37	478.3	1017.4	791.7
304.8	560.4	992.4	815.7
306.22	407.5	931.1	830.6
307.65	457.7	838.3	928.6
309.07	516.4	1180.8	916.4
310.49	565.8	855.2	913.1
311.92	722.5	1172.5	809.4
313.34	506.9	881.9	817.8
314.77	506.4	1004.3	841
316.19	555.3	910.8	880.6
317.62	437	890.6	932.3
319.04	532.1	890	868
320.46	785.7	814.8	855.2
321.89	625.9	886.8	945.8
323.31	568.3	933.9	948.6
324.74	522.4	938.8	880.7
326.16	608.1	1089.4	849.2
327.59	598.8	1243.8	712.8
329.01	700.5	1036.1	1118.5
330.43	402.8	1005.5	837.3
331.86	462.7	827.5	790.5
333.28	566.2	890.2	830.7
334.71	568.9	741.8	877.2
336.13	617.2	1116.4	912.8
337.56	481.4	879.3	1027.2
338.98	586.1	915.1	940.4
340.4	513.7	767.6	737.8
341.83	505.6	1085.1	1059.7
343.25	596.5	963.3	813.4
344.68	393	894.7	902.7
346.1	590.1	998.9	936.4
347.53	507.8	983.3	873.4
348.95	667.3	1155.5	1013.1
350.37	608.9	912.9	839
351.8	654.5	1122.6	1057.4
353.22	595.8	793.5	847.4
354.65	625.4	1081.4	847.4
356.07	574.3	847.1	846.7
357.5	599.5	917.9	948.9
358.92	543.9	1113.1	853.7
360.34	536.6	1005.2	883.7
361.77	561.1	793.1	990.1
363.19	546.5	937.8	850.3
364.62	529.4	944.2	873.1
366.04	665.1	1106.2	921.5
367.47	663.8	1034.9	837.4
368.89	556.2	1040.6	852.9
370.31	580.7	1041.5	1017.4
371.74	593.3	1110.1	868.5
373.16	513.7	888.4	1035
374.59	462.2	1019.7	828.5
376.01	711.1	887.6	842
377.44	537.7	863	860.3
378.86	530	1050.9	852
380.28	600.7	1317.1	837.7
381.71	660.6	1187.4	1055.2
383.13	662.1	1198.2	904.1
384.56	515.1	1119.4	1025.5
385.98	651.6	1075.9	819.7
387.41	566.6	1077.9	1035.1
388.83	649.1	1204	960.3
390.25	616.7	1035.9	961.2
391.68	500.8	1060.9	916.5
393.1	538.7	1058.2	945.8
394.53	611.5	820.6	871.2
395.95	543.4	937.5	1074.7
397.38	526.5	1064.8	845.5
398.8	729.8	923.5	848.2
400.22	573	998.2	922.6
401.65	600	1100.8	936.4
403.07	548.5	978.4	950.7
404.5	636.8	887.2	1166.1
405.92	587.4	1161.2	812.1
407.35	512.7	1023.6	1024.2
408.77	593.8	981.4	1008.6
410.19	477.1	921.3	1022.3
411.62	676.7	886.5	846.5
413.04	524.9	1032.3	999.8
414.47	638.6	1084.7	793.4
415.89	601.3	970.1	952.7
417.32	431.6	1240.1	940.1
418.74	739.5	1073.2	826.8
420.16	558	943.9	860.9
421.59	585.9	1123.5	965.8
423.01	551.2	1052.9	1075.5
424.44	492.6	965.7	1064.3
425.86	632.5	1041.1	942.7
427.29	599.2	1019.7	794.3
428.71	755.5	1054.4	851.5
430.13	541.1	965.7	1113.3
431.56	658.3	996.4	930.7
432.98	697.3	1112.8	813.6
434.41	737.6	950.1	915.5
435.83	805.8	911	1061.6
437.26	638.5	1011.5	1000
438.68	672.9	990.4	962.2
440.1	692.1	964.1	934.4
441.53	619.9	1016.4	1059
442.95	750.3	1094.1	916.6
444.38	615.2	1062.7	1152.1
445.8	579.3	1057.7	983.8
447.23	658.7	1018.6	940.8
448.65	559.5	956.1	999.8
450.07	619.8	851.5	858.6
451.5	653.8	842.2	1199.6
452.92	590.7	1060.2	1047.3
454.35	646.6	968	804.1
455.77	676.8	912	925.3
457.2	615.7	978.8	1080.7
458.62	635.7	1119.7	958
460.04	634.8	1042.7	1114.1
461.47	551	826.1	1026.3
462.89	595.9	1142.8	787.2
464.32	541	884.2	1019.5
465.74	696.7	915.7	978.2
467.17	668.8	964.6	820.3
468.59	522.4	1051	775
470.01	581.5	879.6	897.4
471.44	592.6	1078.9	1016.4
472.86	592.2	1006.3	945.5
474.29	840.7	870.9	833.9
475.71	737	1193.8	1033.2
477.14	739.5	1157.3	793.8
478.56	665.8	1168.7	1106.1
479.98	713.6	954.5	899
481.41	747.2	1008.4	956.3
482.83	458.2	1073.2	1133.8
484.26	753.7	1159.8	768.3
485.68	673.5	1016.1	895.5
487.11	700.8	1041.6	1077.7
488.53	708	1053.2	904.3
489.95	701.1	1214.9	1099.4
491.38	695.6	983.8	1070.5
492.8	523.8	1210.7	777.2
494.23	598.4	1128.6	835.2
495.65	633.8	990.1	1073.5
497.08	628.3	1210.7	955.8
498.5	648.8	1129	1006.2
499.92	452.7	966.8	919.4
501.35	682.2	964.7	826.6
502.77	633.6	1133.6	982.8
504.2	668.4	870.3	1037.6
505.62	607.8	1221.4	1000.2
507.05	609.5	1050.7	974.8
508.47	543.3	1025.1	1080.6
509.89	504.8	994.1	1152.1
511.32	586.6	1151.6	914.3
512.74	700.4	1096.7	1132.1
514.17	638	995.3	988.8
515.59	651.7	1195.3	914.8
517.02	619.4	1103	1011.7
518.44	559.2	975.1	907.5
519.86	657.2	1042.5	1051.9
521.29	770.9	1193.2	919.8
522.71	666.2	1117.7	919.2
524.14	553.9	1167.6	1086.8
525.56	666.3	1144.7	1133.6
526.99	705.6	945.3	790.2
528.41	807	1127.9	1040.2
529.83	605.4	1254	847.6
531.26	794.6	1121.3	915.5
532.68	745.9	1124.4	1292.7
534.11	591.9	1138	932.1
535.53	592.9	1018.5	966.9
536.96	533.8	1048.2	905
538.38	721.4	1194.4	1026
539.8	638.9	1114.5	1010.4
541.23	676.4	1151.1	963
542.65	711.4	1092.8	926.2
544.08	631.7	1145.4	1065.8
545.5	749.3	1078.7	1120.4
546.93	643.7	1088.3	870.9
548.35	577.4	1081.3	868.7
549.77	733.2	1224.4	943.5
551.2	707.1	1075.7	1006.9
552.62	840.7	1214.8	995.2
554.05	706.2	1078	996.7
555.47	824.8	1161.5	913.4
556.9	729.9	1093.9	1011.2
558.32	603.7	1107.5	1125.7
559.74	702.4	954.3	870.1
561.17	557.6	1003.9	1001.8
562.59	730.8	999.2	977.3
564.02	697.9	1186.4	918.6
565.44	787.5	1036.6	931
566.87	713	1092.1	903.7
568.29	730.4	1111.2	895.4
569.71	702.2	1009.9	1188.1
571.14	824.4	1040	1185.6
572.56	705.4	1218.1	1191.3
573.99	546.7	1308.3	968.7
575.41	719.4	931.1	825.5
576.84	780.7	1074.7	1070.2
578.26	756.9	1113	838.9
579.68	665.1	992.3	1025.4
581.11	644.6	1086.6	961.5
582.53	552	896.6	957.4
583.96	669.4	897.6	1071.4
585.38	691.9	1100.4	833.1
586.81	747.6	900.9	925.2
588.23	697.1	1328.2	902.1
589.65	839.9	1205.4	979.8
591.08	568.4	947.5	1006.1
592.5	719.5	943.1	930.9
593.93	668.1	1127.7	1014.2
595.35	660.2	1140.2	960.6
596.78	704.8	1045.1	1126.9
598.2	515.1	1215.5	1070.8
599.62	542.5	1096.3	1137.6
601.05	747.2	838.7	838.7
602.47	713	1033.7	1227.4
603.9	668.3	1018.7	1009.3
605.32	597.9	1116	1045
606.75	740.9	1242.1	970.9
608.17	822.3	1169.9	1129.5
609.59	693.2	1130.4	989.2
611.02	621.6	1092.7	1079.8
612.44	731.7	1133.9	1219.1
613.87	625.9	1226.8	932.3
615.29	685.6	1040.7	1099.2
616.72	729.9	1007.7	910.3
618.14	632.6	1172.5	1068.5
619.56	612	1275.7	1058.9
620.99	692.5	1019.1	954.2
622.41	703.9	1054.5	866.7
623.84	655.6	1080.8	1097.2
625.26	631.5	1038.9	974.1
626.69	551.8	1262.5	1045.7
628.11	626.6	1105.2	977.7
629.53	818.2	1142.4	1016.3
630.96	653.8	1226.6	1122.6
632.38	631.9	1284.3	1005.3
633.81	672.6	1090.3	1093.4
635.23	756.6	1132.7	1047
636.66	669	1194.5	1157.8
638.08	824.1	1073.6	911.9
639.5	715.7	1101.3	1178
640.93	648.4	988.5	1280.9
642.35	601.3	1118.8	1156.1
643.78	621.7	1127.3	1085.4
645.2	498.6	1190.9	1022.4
646.63	745.3	1181.5	1094.4
648.05	530.8	1288.3	1110.4
649.47	848.3	934.6	1026.8
650.9	746.2	1200.1	1125.7
652.32	686	996	1015.8
653.75	770.9	981.4	937.3
655.17	758.9	1047.9	1069.3
656.6	653.5	1178.9	1145.6
658.02	716.1	1238.9	1007.3
659.44	863.7	1266.3	944
660.87	635.2	1069	856.1
662.29	722.3	1193.8	1147.8
663.72	641.5	1273.1	1024.4
665.14	683.3	944	1017.9
666.57	697.7	1115.6	939.5
667.99	621.7	1056.2	1082.8
669.41	631.1	1227.4	1087.6
670.84	679.5	1087.2	1155.1
672.26	933.9	1230.9	1144
673.69	708.1	1188.1	1035.7
675.11	694	1218.8	977.9
676.54	629.5	1203.3	1064.1
677.96	801.5	1158.2	991.3
679.38	830.3	1041.2	1064.1
680.81	659.1	1119.1	1041.8
682.23	709.5	1179	922.2
683.66	762.7	1157.2	986.9
685.08	746	1103.6	1043.4
686.51	644.6	1196.7	1028.2
687.93	716.9	1077.9	1202.8
689.35	761.1	1124.1	1343.2
690.78	702.4	1184.1	1229.4
692.2	686.4	1056.8	980.5
693.63	657.5	1081.9	1035.2
695.05	692.8	1143.5	986.9
696.48	730.7	1086.7	945.5
697.9	641.9	1083.7	1105.4
699.32	611.4	1236.8	867.6
700.75	516.8	1152.5	940
702.17	759.3	1018	1038.5
703.6	637.1	1228.8	1039
705.02	886.8	1130.5	906.9
706.45	811.9	1121.5	1026.5
707.87	741.7	997.9	1083
709.29	643.9	1064.2	849.8
710.72	873.6	1290.8	973.5
712.14	870.9	1252	875.4
713.57	692.4	1146	1015.9
714.99	541.5	1427	1128.7
716.42	949.3	1153.8	1038.7
717.84	690.7	1279.6	1044.8
719.26	762.4	1101.4	1020.1
720.69	612.5	1116.7	908.9
722.11	732.7	1288.5	891
723.54	822.5	1106.6	994.5
724.96	680.7	1173.3	1201.2
726.39	734.1	1472.9	1089.6
727.81	897.2	1161.8	992.3
729.23	837	1296.7	902.2
730.66	653.8	1315.1	928.2
732.08	725.5	1052.2	1047.8
733.51	743.5	1176.4	907.4
734.93	765.7	1121	886.7
736.36	753	1236.6	988.5
737.78	857.8	1097.6	1035.2
739.2	771.2	1226.7	961
740.63	642.2	998.4	1108
742.05	753.2	1269.5	1113.2
743.48	807.9	1132.7	1306.7
744.9	737.2	1333.7	1247.6
746.33	814.7	1045	1175
747.75	799.4	1067.7	960.3
749.17	802.7	1229.9	944.6
750.6	583	1249.2	961.3
752.02	750.1	976.1	1322.7
753.45	800.1	933.2	956.7
754.87	943.2	1216	968.9
756.3	690.8	1342	1010.6
757.72	732.8	1254.4	1062.1
759.14	644.9	987.3	1099
760.57	751.6	1073.8	904.1
761.99	836.6	1249.5	895.3
763.42	762.5	1131.5	1102.9
764.84	722.4	1355.2	1000.2
766.27	1043.8	1311.9	1322.1
767.69	714.1	1205.8	985.5
769.11	805.2	1097.4	1034.8
770.54	681.7	1134.4	1220.4
771.96	578.3	1098.3	1055.7
773.39	780.1	1224.8	1063.3
774.81	822.1	1085.8	920
776.24	626.4	1246.8	1043.9
777.66	783.9	1164.8	1190.6
779.08	672.7	1173.6	1148.5
780.51	505.7	1114.4	1054
781.93	742.3	1046.5	985.5
783.36	632.7	1056	971.7
784.78	633.7	1220.9	999.8
786.21	682.1	1121.3	1000.9
787.63	779.2	1177	1108.8
789.05	666.8	1389.5	1210.6
790.48	940.2	1141.3	1160.7
791.9	737.4	1342.8	1225.6
793.33	708.8	1244.2	1223.3
794.75	545.5	1387.6	983.1
796.18	819.2	1198.9	988.4
797.6	820.7	1099	1202.1
799.02	712.8	1257.6	1113.8
800.45	840	1117.1	1305
801.87	742.8	1115.8	967.5
803.3	889.6	1311.2	1010.7
804.72	749.1	1262.7	1081.7
806.15	720.6	1257.3	1107.9
807.57	667.8	1164.8	1095.7
808.99	662.6	1286.3	1094.2
810.42	620.6	1083.2	1003.6
811.84	715.2	1199.1	805.9
813.27	855	1107.3	1100.9
814.69	657.4	994.9	1057.5
816.12	718.7	1176.8	1161.5
817.54	723.8	1256.7	1011.8
818.96	865.7	1158.4	1179
820.39	711.6	1027.8	894.4
821.81	671.9	1077.7	920.4
823.24	752.8	1225	1263.9
824.66	877.6	1117.1	1285.1
826.09	796.1	1376	1400.7
827.51	709.8	1156.8	1022.2
828.93	733.7	1414.9	1106.3
830.36	774.7	889.7	1122.3
831.78	617.5	1068.4	1101.2
833.21	685.7	1124.4	1112.8
834.63	695.9	1406.9	1157.6
836.06	751.2	1164.5	1114
837.48	886.5	1074.7	1076.3
838.9	516.7	1398.1	1064.4
840.33	783.4	1153.2	1123.5
841.75	648.7	1268.6	969.9
843.18	756.1	1259.2	904.9
844.6	795.3	1140.4	941.6
846.03	788.1	1199.3	1110.2
847.45	821.7	1321.6	1049.8
848.87	651.2	1401.1	1165.3
850.3	703.5	1141.5	1200.1
851.72	739.8	1215.8	1096.5
853.15	727.9	1137.7	1127.4
854.57	844.5	1203	1031.7
856	845.2	1112	986.3
857.42	710.6	1138	1158.4
858.84	848.6	1128.9	1067.5
860.27	772.7	1084.7	1212
861.69	792	1194.6	909.2
863.12	750.1	1273.6	1068.5
864.54	891.6	1261.8	989.1
865.97	878	1366.7	1283.6
867.39	671.4	1224.9	1066.7
868.81	716.2	1264	1127.5
870.24	951.7	1234.3	981.4
871.66	801.4	1174.1	1002.5
873.09	720.9	1196.2	1139.7
874.51	663.7	1217.2	942.5
875.94	676	1211.6	1007.7
877.36	701.8	1288.6	1340.6
878.78	752.6	1301.5	1108.8
880.21	692.8	1207.1	988.4
881.63	683.9	1206.6	1121.6
883.06	822.4	1253.3	1179.8
884.48	735.8	1212.2	948
885.91	751.9	1218.4	1037.8
887.33	820.4	1216.9	1187.3
888.75	734.5	1365.6	1107
890.18	785.4	1038.9	969.1
891.6	774.7	1263.9	992.8
893.03	640.2	1180.5	1238.7
894.45	705.4	1286.6	1111.1
895.88	827.5	1148.7	1003.3
897.3	756.9	1249.9	974.9
898.72	680.9	1159.2	1058.1
900.15	683.6	1235.1	1029.6
901.57	738.2	1293	1229.6
903	717.8	1011.3	1158.4
904.42	712.2	1223.2	1077.4
905.85	767.7	1153.8	1147.8
907.27	809.2	1079	1076.1
908.69	678.2	1212.4	873.9
910.12	744.9	1054.3	1079.1
911.54	788	1139	1178
912.97	864.1	1241.1	919
914.39	653.3	1228.5	1058.2
915.82	719.1	1279.7	1105
917.24	710.6	1246.2	1003.4
918.66	672.4	1417.1	1202.4
920.09	790.7	1204.8	1080.4
921.51	634.1	1278.8	1333.8
922.94	808.4	1110.3	1147.5
924.36	892.9	1389.7	1059.9
925.79	698.9	1156.7	1343.2
927.21	901.6	1395.9	1044
928.63	856.9	1131.5	1076.6
930.06	945.1	1287.8	1229.8
931.48	751.9	1435.1	1014.3
932.91	805.2	1216.1	1086.8
934.33	763	1274	1326.4
935.76	787.1	1179.9	971.1
937.18	770.6	1357.7	992.4
938.6	731.6	1259	1071.3
940.03	783.6	1259.1	1275.1
941.45	608.9	1192.5	1062.4
942.88	673.6	1244	1314
944.3	854.4	1269.1	1195.8
945.73	771.9	1326.4	1125.9
947.15	828.1	1110.7	1096.7
948.57	665.9	1295.5	1049.6
950	778.8	1270.7	1278.3
951.42	700.1	1262.4	1035.2
952.85	797.9	1199.7	1123.8
954.27	765.2	1316.1	1161.4
955.7	727.8	1181.5	1153.5
957.12	739.6	1478.4	1120.4
958.54	678.5	1290.2	1329.8
959.97	825.7	1197.6	984.5
961.39	672.3	1331.7	1000.6
962.82	647.8	1222	1223
964.24	789.6	1161.8	1047
965.67	813.2	1172.7	1197.5
967.09	919.7	1310.3	942.4
968.51	762.2	1167.6	1226.3
969.94	758.1	1153.8	1295
971.36	849.8	1080.6	982.3
972.79	738.2	1300.9	1082.6
974.21	789.2	1306.1	1146.8
975.64	933.4	1258.3	1200.1
977.06	844.4	1336.2	1050.5
978.48	821.2	1304	1171.1
979.91	558	1188	1228.4
981.33	715.4	1336	1001.3
982.76	775.2	1324.7	872.5
984.18	908.1	1266.6	1002.8
985.61	829.8	1036.7	1144.7
987.03	921.3	1086.2	1336.4
988.45	653	1217.2	1180.1
989.88	758.5	1056.9	1137.8
991.3	836.2	1162.8	1235.2
992.73	707.1	1439.5	1200.5
994.15	896.2	1040.4	1056.9
995.58	889.4	1309.7	1044.9
997	655.9	1258.1	1248.9
998.42	632.5	1342.8	1074.8
999.85	917.2	1151	1044.7
1001.3	733.3	1164.9	1088.8
1002.7	766.8	1521.4	1214
1004.1	787.8	1341.9	1260.1
1005.5	832.5	1296.6	1162.3
1007	760.6	1465.1	1097.7
1008.4	800.9	1262	1042
1009.8	781.7	1218.7	1116.4
1011.2	721.8	1248.4	1032.3
1012.7	693.5	1102	1060.2
1014.1	714.9	1211.7	1252.4
1015.5	869.9	1397.9	1086
1016.9	657.7	1334.7	1128.9
1018.4	804.3	1108.2	1119.9
1019.8	553.7	1208.3	969.5
1021.2	969	1197.4	1313.6
1022.6	647.5	1572	990.1
1024.1	840.7	1230.4	1113.2
1025.5	902.9	1094.1	992.5
1026.9	674.2	1258.9	1069.5
1028.3	717.1	1181.1	1207
1029.8	739.8	1255.8	1091.8
1031.2	1099.5	1119.3	1128.2
1032.6	753.6	1333.1	1334.3
1034	860.2	1079.3	1116.3
1035.5	769.5	1365.8	1139.7
1036.9	624.9	1207.8	1082.2
1038.3	655.4	1344.4	1022
1039.7	782.7	1145.1	1177.9
1041.2	898.1	1371.2	1219
1042.6	762	1141.3	1211.1
1044	894.1	1242.7	1067.8
1045.4	629.3	1366.7	1081.9
1046.8	870.4	1199.8	1037.5
1048.3	727	1300.7	990.3
1049.7	797.2	1247.8	986.3
1051.1	813.1	1181.7	1017.4
1052.5	749.1	1091.3	989
1054	824.3	1509.6	1119.9
1055.4	752.4	1089.7	842.3
1056.8	780.9	1146.2	1230.3
1058.2	822.2	1355.2	1188
1059.7	716.3	1277.5	1004.6
1061.1	907.2	1272.2	915.8
1062.5	922.2	1320.9	1160.3
1063.9	724.4	1206.7	1113
1065.4	842.6	1220.9	1155.1
1066.8	871	1240.4	965.8
1068.2	793.3	1336.6	1195.6
1069.6	808.7	1081	1041.4
1071.1	757.4	1436	1187.5
1072.5	924.2	1249.3	801.1
1073.9	889.7	1167.3	1036.8
1075.3	855.8	1312.6	1145.4
1076.8	841.7	1243.6	1072.7
1078.2	749.6	1007.6	997.3
1079.6	672.7	1190.3	1055.6
1081	677.6	1185.1	1006.9
1082.5	807.6	1296.1	1057.6
1083.9	789	1222.1	1088.2
1085.3	857.8	1124.3	1239
1086.7	802.4	1187.2	997.8
1088.2	888.3	1403	1072.4
1089.6	775.3	1123.3	1088.2
1091	839.6	1416.9	1424.5
1092.4	785.3	1389.6	1198.6
1093.9	847.3	1165.3	1050.9
1095.3	887.6	1188.6	1191.9
1096.7	757.5	1354.9	1304.4
1098.1	757.2	1230.9	1136.4
1099.5	860.4	1345.8	1219.5
1101	807.4	1288.8	1017
1102.4	738.8	1139	1029.7
1103.8	994	1251.5	1013.2
1105.2	830.5	1461.2	1132.5
1106.7	714.4	1303.4	1001.5
1108.1	867	1386.4	1094.7
1109.5	807	1160.5	1107.1
1110.9	838	1203.6	1000.4
1112.4	962.6	1318.9	1185.8
1113.8	1022.3	1097.9	1016.3
1115.2	785.9	1465.1	1231.7
1116.6	867.5	1192.6	1129.5
1118.1	852.1	1259.1	1318.7
1119.5	697.1	1336.9	1293.5
1120.9	684.3	1145	1145.7
1122.3	762.1	1235.6	923.9
1123.8	840	1407.9	1131.2
1125.2	899.5	1157.8	964.6
1126.6	770.7	1171.1	1113.2
1128	1020.2	1369	1172.8
1129.5	784.9	1306.1	1202.6
1130.9	720.9	1442.1	1065.1
1132.3	834.7	1173	1144.7
1133.7	828	1199.1	1211.5
1135.2	819.6	1270.3	1051.9
1136.6	778.1	1179.2	1164.9
1138	804.3	1333.9	1350.4
1139.4	927.5	1190.9	1129.3
1140.9	560.3	1272.8	1003.4
1142.3	781.3	1442.4	1060
1143.7	599.7	1356	1131.5
1145.1	730.5	1047.4	1194.9
1146.5	955.2	1198.2	1040.1
1148	841	1309.2	1117
1149.4	837.8	1396.8	989.5
1150.8	730.3	1320.2	1287.4
1152.2	882.3	1122	1110.1
1153.7	889.3	1144.9	1090.4
1155.1	919.2	1453.3	1156.6
1156.5	824.9	1254.9	1188.9
1157.9	722.9	1386.1	974.2
1159.4	767.4	1305.1	1197.4
1160.8	1014.6	1195.4	1135.6
1162.2	925.9	1198.5	1307.8
1163.6	930.6	1239.4	1253.9
1165.1	688.9	1267	1102.8
1166.5	863.5	1263.1	1319.8
1167.9	859.8	1339.9	1280.1
1169.3	806.8	1288	1035.4
1170.8	785.2	1544.9	1135.4
1172.2	710.8	1123.4	1182.8
1173.6	721.3	1085.3	1218.9
1175	683.1	1243.2	1072.1
1176.5	846.9	1285.5	1224.8
1177.9	878.4	1394.9	999.5
1179.3	814	1104.3	1111.6
1180.7	774	1344.5	914.7
1182.2	798.2	1379.3	1194.6
1183.6	744.5	1229.4	1088.3
1185	964.1	1274	1294.8
1186.4	728.7	1202.1	1298.7
1187.9	671	1322.4	1252.1
1189.3	950.4	1387.5	1183.2
1190.7	944.6	1352.9	1011.5
1192.1	855	1183.2	1118.7
1193.6	937.3	1305.6	1298.4
1195	836.8	1314.3	1254.5
1196.4	1049.5	1362.9	1060.4
1197.8	991.4	1187.7	1176.3
1199.2	818.1	1164.4	1070.6
1200.7	881.4	1385.6	1138
1202.1	839.5	1179.5	1186.1
1203.5	867.7	1214.1	1218.1
1204.9	690.8	1244.3	1268.3
1206.4	677.8	1244.7	1119.6
1207.8	572	1280.7	1030.6
1209.2	836.9	1234.4	1314.3
1210.6	729.1	1369.2	1112.5
1212.1	772.3	1297.1	1041.1
1213.5	806.3	1333.8	1151.3
1214.9	796.7	1397.1	1059.4
1216.3	859.8	1157.1	922.3
1217.8	790.7	1102.2	1090
1219.2	953.6	1189.1	1058
1220.6	769	1129	1049.6
1222	793.5	1147.9	1100
1223.5	888.1	1401.2	1028.7
1224.9	669.9	1460.3	1110
1226.3	716	1324.6	1093.1
1227.7	737.2	1148.5	1008.6
1229.2	706.5	1134.8	1165
1230.6	860.3	1300	955.9
1232	749.1	1354	1143.9
1233.4	802.9	1398.1	1297.3
1234.9	884.4	1147.7	1086
1236.3	877.5	1262.2	1277.7
1237.7	759.5	1338.3	1048.4
1239.1	811.5	1269.4	1049
1240.6	770.8	1439.1	1126.6
1242	805.9	1361.5	1164.5
1243.4	918.9	1301.8	1089.7
1244.8	770.2	1490.1	1144.8
1246.2	780.5	1238.4	1243.5
1247.7	712.8	1452.1	1005.7
1249.1	800.4	1333.9	1199.9
1250.5	939.7	1340.1	1264.7
1251.9	820.4	1186.5	1254.2
1253.4	805.8	1365	1052.5
1254.8	983.6	1184.6	1237.5
1256.2	791.9	1247.1	1061.1
1257.6	929.6	1414.4	1107.4
1259.1	896.4	1172.2	1152.1
1260.5	731.6	1297.7	1151.4
1261.9	872.7	1301.2	1041.4
1263.3	944.3	1088.5	1039.7
1264.8	839.7	1189.7	1003
1266.2	765	1378.1	1215.2
1267.6	929.6	1096.7	1171.9
1269	843	1196.4	1259.3
1270.5	1073.6	1367.5	1078.7
1271.9	961.6	1260.3	1204
1273.3	861.5	1037.2	1125.7
1274.7	1005.9	1159.2	1293.2
1276.2	982.2	1456.7	1228.2
1277.6	1029.4	1387.8	988.5
1279	787.4	1329.2	1018.8
1280.4	742.4	1353.3	1148.2
1281.9	932.1	1370.7	1323.3
1283.3	850.6	1556.4	1072.6
1284.7	877.3	1244	1117
1286.1	605.6	1285.8	1042.4
1287.6	942.6	1353	1194
1289	1007.4	1391.3	1234.3
1290.4	788.1	1382.1	1226.5
1291.8	853	1386.5	1122.3
1293.3	867.7	1323.6	1145.5
1294.7	912.9	1456.8	1223
1296.1	748.5	1336.2	1462.1
1297.5	772.1	1325.5	1048.8
1298.9	899.6	1228.6	1172.8
1300.4	846.2	1230.8	1167.4
1301.8	934.8	1160.7	897.2
1303.2	799.3	1585.8	1242.7
1304.6	703.4	1223.8	1112.6
1306.1	691.3	1105.7	1371.2
1307.5	852	1372.5	1146.6
1308.9	933.5	1358.8	1119.5
1310.3	793.2	1397.5	1146.1
1311.8	896.9	1213.9	1359.7
1313.2	867	1249.4	990.9
1314.6	972.3	1196.1	1315.4
1316	798	1256.3	1241.3
1317.5	844.1	1037.8	1160.2
1318.9	826.7	1250.5	1264.1
1320.3	762.7	1204.8	1185.5
1321.7	816.1	1309	1063.9
1323.2	697.6	1447.7	1083.8
1324.6	826.7	1339.7	1237.5
1326	722.1	1276.7	1291.7
1327.4	906.6	1444.1	1056
1328.9	764.6	1453	1374.3
1330.3	886.5	1325.2	926.8
1331.7	761.4	1537.7	1372
1333.1	844.6	1355.6	975.5
1334.6	966.5	1356.5	1140.9
1336	1077.7	972.9	1230.1
1337.4	712.6	1260.1	1042.4
1338.8	733.5	1297.8	1272.6
1340.3	826.5	1232.9	1152.4
1341.7	789.7	1284.7	1146.7
1343.1	632.7	1378.1	1172.7
1344.5	967.1	1263.8	949.3
1345.9	950.4	1189.6	1044.2
1347.4	843	1251.5	1098
1348.8	820.9	1316.8	1124.4
1350.2	861.9	1146.7	1287.4
1351.6	803.8	1357.7	1202.7
1353.1	787.7	1506.9	1146.3
1354.5	972	1202.2	1240.1
1355.9	923.1	1347	1135.4
1357.3	760.1	1202.3	1164.5
1358.8	736.9	1340.8	1173.7
1360.2	594.3	1252	1188.7
1361.6	766.7	1378.5	1245.1
1363	851.2	1161.5	1114.6
1364.5	896.7	1186.2	1289.1
1365.9	864.6	1244.7	1265.8
1367.3	927.5	1189.4	1458
1368.7	852.1	1180.6	1194.4
1370.2	888.1	1485	1002.7
1371.6	797.6	1362.3	990.8
1373	934	1268.1	1122.8
1374.4	805.3	1217.7	1054.5
1375.9	689.8	1187.3	1028.4
1377.3	749.7	1467.6	1254.1
1378.7	948.4	1359.6	1193.8
1380.1	831.6	1585.4	987
1381.6	851.8	1335.1	1022.6
1383	918.9	1246.2	1406.3
1384.4	931	1360.6	1225
1385.8	912.1	1508.5	1144.3
1387.3	892.8	1346.6	1126.6
1388.7	769.8	1245.1	1171.2
1390.1	693.1	1173	1068.8
1391.5	885.4	1109.6	1200.7
1393	879.5	1375.4	1199.2
1394.4	946.4	1489	1261.2
1395.8	813.3	1221.7	1130.2
1397.2	831.4	1199.1	1193.7
1398.6	856.5	1225.7	1403.2
1400.1	1009.7	1220.7	1374.6
1401.5	735.9	1245.6	1242.1
1402.9	883.7	1300.9	1292.7
1404.3	1015.9	1320	1084
1405.8	843.8	1173.4	1104.2
1407.2	810.5	1284.5	1230
1408.6	863.6	1517.9	1106
1410	788.4	1175.5	1057.1
1411.5	913.5	1485.8	1163.6
1412.9	731.7	1147.6	1242.7
1414.3	893.4	1250.8	1085.7
1415.7	840.5	1249.4	1277.3
1417.2	895.6	1323.7	914.1
1418.6	905.3	1469	1100.3
1420	882.9	1371.4	1318.9
1421.4	697.1	1448.5	1310.8
1422.9	891.6	1514.4	1344.2
1424.3	792.6	1320	1321
1425.7	727.4	1309.9	1038.6
1427.1	986.5	1287.3	1241.7
1428.6	785.7	1321.4	1103
1430	915.6	1219.3	1302.5
1431.4	829.4	1193.3	1095.3
1432.8	903.6	1370	1276.9
1434.3	1080	1080.7	1315.1
1435.7	708.2	1289.4	938.5
1437.1	936	1384.7	941.4
1438.5	641.6	1293.8	1055.8
1440	815.9	1348.2	1371.1
1441.4	732.8	1342.3	1054.9
1442.8	899.6	1256.7	1200.3
1444.2	895.2	1424	1178
1445.6	723.7	1279	1152.2
1447.1	786.2	1390.4	1285.7
1448.5	756.9	1312	1137.8
1449.9	882.2	1303.8	1161.3
1451.3	825.9	1510.6	1139.1
1452.8	933.5	1203.7	1186.9
1454.2	1042.8	1253.2	1164.2
1455.6	857.5	1467.8	1164.9
1457	812.9	1411.3	1201.5
1458.5	966	1076.8	1096.1
1459.9	838.5	1358.6	1065.2
1461.3	900.4	1535.7	1055.9
1462.7	955.2	1393.9	1087.6
1464.2	978.4	1353.1	1198
1465.6	895.7	1368.8	1101.2
1467	868.4	1342.4	1126.5
1468.4	819.1	1028.7	1237.1
1469.9	683	1149.3	1277.1
1471.3	801.8	1380.5	1299.1
1472.7	905.3	1525.3	1294.5
1474.1	707.9	1329.3	992.5
1475.6	728.4	1075.7	1360.7
1477	837.5	1409.7	1182.6
1478.4	801	1265.9	1072.1
1479.8	893.2	1218.4	1061.5
1481.3	857	1202.1	1274
1482.7	703.1	1368.6	1073.6
1484.1	852.4	1470.4	1024.7
1485.5	777.1	1262.2	976
1487	917.2	1342.7	1173.9
1488.4	767.6	1225.1	1032.9
1489.8	1076	1385	1277.9
1491.2	754.9	1309.5	1178.7
1492.7	700.4	1193.7	1085.7
1494.1	980.3	1400.1	1121.5
1495.5	742.8	1370.6	1161.7
1496.9	732.3	1207.2	1060.3
1498.3	893.2	1370	1061.4
1499.8	894.8	1396.5	1304.4
1501.2	849.9	1482.2	1201.1
1502.6	733.4	1179.4	1193
1504	987.3	1214.7	1227.3
1505.5	938.3	1389.8	1182.4
1506.9	786.2	1246.9	1109.5
1508.3	793.2	1298.4	1268.5
1509.7	849.5	1487.2	1105.7
1511.2	736.8	1353.1	1054.4
1512.6	984.7	1358.5	973.3
1514	1050.4	1563.7	1095.5
1515.4	955.4	1421.3	1004.2
1516.9	859.8	1327.8	1054.4
1518.3	857.6	1278.7	1112
1519.7	750.6	1325.4	1345.8
1521.1	903.9	1178.5	1409.1
1522.6	826.8	1536.2	1096.9
1524	859.2	1046.5	1290.4
1525.4	740.4	1301.7	1100.9
1526.8	926.3	1343.9	1273.6
1528.3	873.3	971.6	1205.8
1529.7	1108.8	1127.3	1277.5
1531.1	904.4	1465.1	1109
1532.5	922.5	1360.2	1258.8
1534	996.9	1268.6	1108.1
1535.4	1046.3	1169.2	1000.7
1536.8	841	1394.7	1156.1
1538.2	1017.6	1277.1	1282.6
1539.7	1010.1	1297.8	1044
1541.1	883.6	1212.5	1111.3
1542.5	816.5	1163.7	1162.3
1543.9	827.9	1265.4	1247.4
1545.3	721.7	1323.2	1027
1546.8	927.7	1334.1	1178.4
1548.2	885	1304.5	1205.2
1549.6	809.7	1274.8	1058.8
1551	808.2	1151.8	1204
1552.5	841.4	1259.4	1070
1553.9	996.4	1296.6	1105.9
1555.3	858.1	1372.6	1146.1
1556.7	819.8	1102.6	1127.8
1558.2	824.4	1285.3	1239.4
1559.6	1002.3	1370.4	1148.3
1561	800.6	1358.2	1056.1
1562.4	738.7	1313.7	1197.8
1563.9	1132.7	1058.6	1033.7
1565.3	818.5	1273.2	1174.4
1566.7	878.7	1300.2	1227.3
1568.1	1012.6	1206.3	1146.7
1569.6	927.6	1397	1207.8
1571	741.4	1266.6	1245.6
1572.4	872.3	1372.7	1217.6
1573.8	770.5	1664.5	1165.1
1575.3	901.8	1294.7	986.5
1576.7	946.8	1383.9	1174.4
1578.1	1028.7	1258.2	1187.1
1579.5	980.8	1159.8	1108.1
1581	830.7	1341.2	1083.4
1582.4	1042.5	1339	1277.5
1583.8	923.2	1384.5	1169.3
1585.2	927.9	1263.8	1264.3
1586.7	847.6	1197.9	1406.5
1588.1	1016.3	1434.1	1261.5
1589.5	773.5	1373.3	1205.6
1590.9	755.8	1264.5	1074.2
1592.4	957.3	1327.9	1302.5
1593.8	828.8	1067.9	1127.6
1595.2	1047	1385.8	1231.6
1596.6	694.6	1251.4	1085.9
1598	992.5	1448.6	1145.2
1599.5	865.9	1507.9	1015.5
1600.9	877.4	1158.9	1176.3
1602.3	1142.1	1185.7	1102.2
1603.7	836.1	1238.4	1221.3
1605.2	1134.7	1135.4	1320.4
1606.6	900.7	1273.1	1195.9
1608	999.9	1317.8	1185.7
1609.4	884.4	1202.9	1167.6
1610.9	894.1	1323	1130.8
1612.3	977.3	1473	1158.6
1613.7	1042.8	1294.3	1262.1
1615.1	719	1482.2	1191.8
1616.6	963.3	1517.6	1135.4
1618	902.7	1320.7	1349.3
1619.4	888.7	1191.5	1201.5
1620.8	715.9	1403.2	1278.7
1622.3	918.7	1413.7	1178.6
1623.7	1000.9	1446.8	1152.5
1625.1	1019.9	1455.2	1342.2
1626.5	908.1	1435.8	1130.1
1628	838.1	1287.6	1082.8
1629.4	826.2	1412.1	1033.5
1630.8	942	1449.8	1170.4
1632.2	1003.3	1312.7	1021.6
1633.7	894.5	1231.1	1125.9
1635.1	952.9	1569	1249.5
1636.5	776.7	1642.7	1319.4
1637.9	868.5	1434.2	1351.7
1639.4	827.4	1264.3	1108.6
1640.8	732.1	1293.1	1417.6
1642.2	885.8	1461.4	1163.9
1643.6	808.3	1274	1183.3
1645	943.9	1427.4	939.8
1646.5	979.8	1284.7	1062.1
1647.9	869.4	1403.9	1069.7
1649.3	790.9	1345.8	1092.8
1650.7	803	1614.2	1101.5
1652.2	777.1	1303.7	1221
1653.6	881.1	1487.9	1176.9
1655	1017.5	1297.7	1359.2
1656.4	997.2	1745.7	1072.3
1657.9	1036.8	1257.2	1080.9
1659.3	789.9	1239.1	1271.4
1660.7	917.7	1452	1331.3
1662.1	895.1	1395.2	1166.3
1663.6	943.8	1404.3	1025.8
1665	1030	1259.7	1100.3
1666.4	804.5	1371.8	1317.4
1667.8	882.5	1348.9	1111.4
1669.3	756.8	1314.7	1334.2
1670.7	954.8	1327.1	1329.5
1672.1	832.6	1259.7	1227.2
1673.5	828.6	1408.6	1190.4
1675	834.6	1296.5	1370.6
1676.4	804.2	1326	1047.9
1677.8	1010.5	1341.3	1467.9
1679.2	780.2	1201.2	1219.6
1680.7	873.9	1556.9	1063.9
1682.1	754.2	1515.4	1304.6
1683.5	992.6	1426.6	1164.7
1684.9	1012.1	1247.6	1075
1686.4	845.1	1155.1	1220.2
1687.8	874.2	1288.7	1297.3
1689.2	790.1	1183.6	1514
1690.6	802.1	1348.6	1041
1692.1	852	1225.8	1157.2
1693.5	1039	1401.6	1166.8
1694.9	803.6	1263.6	1163.7
1696.3	923.8	1168.6	1341.1
1697.7	984.4	1240.9	1320.2
1699.2	684.4	1474.2	1304.9
1700.6	792.6	1201.9	1327.1
1702	828.5	1354.2	1135.6
1703.4	753.6	1463.4	1471.4
1704.9	921.6	1329.8	1219.9
1706.3	776.2	1392.3	1162.4
1707.7	653.5	1402.3	1346.7
1709.1	974.9	1396.6	1239.4
1710.6	899.6	1395.4	1037.6
1712	800.1	1456	1509.9
1713.4	883.3	1430.2	1123.5
1714.8	835.1	1197.8	1172.1
1716.3	930.3	1348	1112.1
1717.7	941.4	1280.6	1208.9
1719.1	934.3	1160.1	1279.2
1720.5	787.8	1396.8	1137.1
1722	848.6	1414.1	1105.6
1723.4	924	1264.6	1323.6
1724.8	900.2	1464.2	1309.5
1726.2	785.6	1241.6	1173.2
1727.7	917.5	1440.6	1130.7
1729.1	1055.5	1222.2	1218.9
1730.5	774.5	1479.6	1185.7
1731.9	1038.4	1505.1	1214.7
1733.4	940.9	1438.8	1222.6
1734.8	799.7	1191.5	1046.2
1736.2	759.1	1304.5	1319.4
1737.6	832.6	1400.1	1299.4
1739.1	788.7	1411.6	1021.1
1740.5	1025	1372.1	1293.9
1741.9	878.8	1507.3	1296.3
1743.3	897.7	1542.1	1142.9
1744.7	845.5	1292.7	1268.5
1746.2	1063.5	1284.2	1202.9
1747.6	882.7	1482.8	1217.4
1749	845	1458.6	1174.3
1750.4	875	1202.4	961
1751.9	1011.2	1365.1	1126.6
1753.3	660.7	1479.7	1044.9
1754.7	926.7	1284.9	1078.3
1756.1	941.1	1453.2	1176.6
1757.6	728.6	1194.3	1148.5
1759	871.8	1369.6	1056.1
1760.4	899.5	1291.2	1174
1761.8	1000.4	1353.5	1169.9
1763.3	909.4	1513.7	1210.1
1764.7	957.8	1330.4	1013.8
1766.1	858.3	1419.3	1107.5
1767.5	1007.8	1566.2	1154.4
1769	852.7	1448.2	1200.5
1770.4	897.6	1477.1	976.7
1771.8	964.3	1318.9	1187.6
1773.2	983.4	1517	1251
1774.7	956.2	1300.3	1302.2
1776.1	882	1248.7	1094.5
1777.5	906.5	1412.3	1201.2
1778.9	883.5	1292.3	1273.7
1780.4	785.8	1320.8	1326.4
1781.8	842.5	1453.9	959.9
1783.2	795.6	1373.7	1221.1
1784.6	984.3	1367.3	1359.8
1786.1	927.6	1475.2	1260.9
1787.5	939.8	1457.4	1214.8
1788.9	926.4	1409.1	1135.8
1790.3	993.7	1195.4	1106.2
1791.8	941.5	1383.9	1103.4
1793.2	912.6	1446.3	1062.9
1794.6	916	1233.8	1214.7
1796	1040.3	1268.6	1101.7
1797.4	834.9	1403.7	1104
1798.9	997.7	1244.9	1041.8
1800.3	983	1141	1135.8
1801.7	965.5	1334.4	1150.7
1803.1	1030.7	1354.4	1009
1804.6	761.3	1430.3	1067.8
1806	975.9	1398.3	1141.7
1807.4	1067	1517	1124.2
1808.8	917.6	1481.6	1244.4
1810.3	904	1446	1276.2
1811.7	914.5	1448.9	1124.9
1813.1	889.2	1455.6	1194.6
1814.5	995.3	1505.8	1050.1
1816	827.7	1416.1	1049.7
1817.4	812.7	1444.3	1112.2
1818.8	817.5	1473.8	1098.9
1820.2	962.6	1391.6	1186.9
1821.7	880.3	1419.5	1160.9
1823.1	843.5	1331.8	1228.2
1824.5	880.8	1286.4	1235.2
1825.9	905	1314.8	1186.3
1827.4	811	1430.6	1087.4
1828.8	962.6	1238.7	1340.5
1830.2	1028.2	1309.1	1047.5
1831.6	798.1	1562.4	1153.9
1833.1	907.9	1540.8	1314.4
1834.5	1027	1477.1	1087.4
1835.9	896.7	1569.6	1137.8
1837.3	923.4	1338.3	1114.6
1838.8	856.3	1384.6	1172.1
1840.2	936.8	1518.5	1257.9
1841.6	951.1	1238.8	1141.4
1843	905.7	1288.6	1047.5
1844.4	852.9	1606.9	1248.1
1845.9	841.6	1255	1088.8
1847.3	965.8	1444.9	1138.7
1848.7	1090	1434.3	1154.6
1850.1	1122.4	1402.4	1332.3
1851.6	917.4	1444.7	1259.4
1853	928	1239	1255
1854.4	878.4	1243.9	1273.7
1855.8	764.7	1382.9	1339.8
1857.3	1037.7	1455.9	1400.3
1858.7	954.5	1353	1175.3
1860.1	759	1592.6	1161.9
1861.5	987	1167.2	1337.1
1863	892.8	1333.2	1200.4
1864.4	968.2	1479.5	1291.7
1865.8	744.1	1364.7	1125
1867.2	819.6	1308.9	1206
1868.7	848.3	1230.9	1383.3
1870.1	926.4	1241.1	1069.4
1871.5	807.4	1410.9	1300.4
1872.9	717.9	1153.9	1065.9
1874.4	855.6	1370.2	1192.6
1875.8	759.6	1203.2	1156.2
1877.2	925.1	1504.4	1144.7
1878.6	937.5	1318.5	1153.5
1880.1	1241.4	1305.5	1169.4
1881.5	953.8	1275.9	917.5
1882.9	797.8	1358.2	1217.2
1884.3	784.6	1560.9	1118.1
1885.8	785.7	1469.7	886.6
1887.2	914.1	1642.8	1132.8
1888.6	850.6	1738.7	1317.4
1890	697.6	1326.4	1261.8
1891.5	942	1392.3	1239.9
1892.9	1021.6	1282.8	1432
1894.3	882.9	1220.2	1253.8
1895.7	976.6	1425.2	1212.9
1897.1	957.2	1474.8	1266.1
1898.6	871.9	1455	1326.7
1900	936.6	1389.7	1229.3
1901.4	850.1	1299.5	1358.8
1902.8	1264.5	1309.3	1362.4
1904.3	891.4	1406.4	1210.6
1905.7	1048.7	1707.3	1224.9
1907.1	887	1572.8	1032.8
1908.5	887.8	1478.3	1230.5
1910	911	1395.4	1152.5
1911.4	1202	1311.3	1286.1
1912.8	789.7	1321.8	1264.3
1914.2	920.2	1331.3	1160.8
1915.7	911.3	1280.9	1250.2
1917.1	1075.6	1587.7	1237.7
1918.5	1187	1483.6	1267.3
1919.9	945.1	1349.7	976
1921.4	1056.3	1485.9	1203.5
1922.8	804.7	1206.7	1412.5
1924.2	1102.7	1373.1	1171.8
1925.6	792.1	1323.9	1294.5
1927.1	1031.4	1358.7	1319.9
1928.5	777.4	1302.6	1231.1
1929.9	803.5	1387.7	1305.6
1931.3	832	1406.9	1279.9
1932.8	1007.5	1450.1	1227.1
1934.2	1054.3	1474.6	976.6
1935.6	954.8	1557.8	1145.8
1937	885.9	1673.2	1135.9
1938.5	1055.6	1434.5	1212.2
1939.9	907.4	1433.3	1285.5
1941.3	906.9	1295.6	1081.5
1942.7	875.2	1303.2	1224.5
1944.1	860.4	1308.8	1171
1945.6	1105	1537.8	1048.3
1947	1115.4	1532.4	1261.8
1948.4	857.3	1110.2	1130.9
1949.8	941.5	1401.5	987.8
1951.3	1097.5	1458.9	1317.1
1952.7	909.5	1346.3	1120.6
1954.1	932.5	1479.5	1003.8
1955.5	799	1505.8	1298.5
1957	993.9	1179.4	1105.4
1958.4	927.1	1346.6	1175.5
1959.8	1088.5	1354	1249.9
1961.2	991.6	1126	1228.1
1962.7	983.8	1490.9	1110.1
1964.1	992.2	1585.5	1292.4
1965.5	1194.1	1436.1	1169.6
1966.9	981.9	1150.8	1244.8
1968.4	879.5	1538.4	1281.6
1969.8	777.8	1474.9	1469.5
1971.2	1020	1385.3	1043
1972.6	785.3	1437.8	1191.5
1974.1	1062.5	1208.6	1141.9
1975.5	920.6	1449.7	1178.5
1976.9	937.8	1354.1	1044.6
1978.3	1002.2	1259.7	1141.6
1979.8	899.7	1331.4	1324.4
1981.2	930.9	1156.3	935.2
1982.6	995.5	1358.6	1101.7
1984	1026.5	1301.2	1015.7
1985.5	876.8	1490.9	1081.2
1986.9	874.6	1475.1	1010.1
1988.3	1044.5	1345	1236.5
1989.7	946.8	1436.2	1070.4
1991.2	950.3	1431	1141.1
1992.6	1074.9	1295.5	1041.5
1994	922.3	1413.5	1229.5
1995.4	1027	1523.5	1240.8
1996.8	978.8	1320.4	1093.3
1998.3	903.5	1463.3	1214.5
1999.7	961	1579	1231.2
2001.1	1066.7	1466.4	1203.4
2002.5	811	1434	1099.2
2004	950.5	1354.4	953.2
2005.4	920.7	1480.2	1322.9
2006.8	826.4	1408.4	1200.4
2008.2	1009.5	1316.9	1125.4
2009.7	762.7	1343.7	1133.1
2011.1	859.9	1587.2	1191.6
2012.5	875.7	1466.4	1157.6
2013.9	958.9	1426.3	1188.3
2015.4	1029.2	1172	1196
2016.8	944.5	1392.4	1215.5
2018.2	1074.9	1289.7	1265.7
2019.6	967.4	1477	1281.6
2021.1	1033.6	1474.9	1320.7
2022.5	902.9	1331.3	1292.8
2023.9	963.5	1469.9	1100
2025.3	749.9	1430.6	1251.2
2026.8	951.3	1292.3	1320.7
2028.2	819.7	1266.8	1221
2029.6	826.5	1510.2	1344.2
2031	859.3	1489.5	1196.5
2032.5	1003.7	1282	1179.4
2033.9	907.2	1375.7	1184.7
2035.3	759.1	1460.8	1158.9
2036.7	838.4	1216.6	1232.2
2038.2	848.7	1494.2	1155.1
2039.6	994.9	1468.9	1117.6
2041	830.6	1411.6	1080.3
2042.4	829.1	1493.6	1493.3
2043.8	1118.9	1382.2	1293.1
2045.3	822	1362.4	1128.5
2046.7	869.8	1367.8	1288.9
2048.1	1089.4	1460.2	1187.5
2049.5	1035.7	1441.6	1323
2051	891.4	1398.2	904.8
2052.4	1080.4	1315.3	1199.1
2053.8	870	1504.8	1058.9
2055.2	799.9	1379.9	1106.9
2056.7	908	1384.5	1116.8
2058.1	907.9	1161.5	1213
2059.5	922.4	1349.4	1153.1
2060.9	1071.8	1294.3	1305.9
2062.4	983.5	1557.8	1177.7
2063.8	931.8	1537.1	1185
2065.2	902.1	1513.6	1217.2
2066.6	861.7	1515.1	1267.3
2068.1	1022.3	1331	1173.5
2069.5	1041.8	1231.6	1133.8
2070.9	848.9	1354.4	1110.4
2072.3	1005	1173.3	1069.4
2073.8	796.8	1522.9	1227.3
2075.2	876.5	1272.9	1089.6
2076.6	817.6	1319.6	1214.8
2078	814.3	1447.6	1330.2
2079.5	815	1569.6	1100.3
2080.9	1136	1660.4	1403.6
2082.3	1023.1	1216.3	1126.3
2083.7	892.1	1444.2	1155.3
2085.2	923.5	1305.7	1322.8
2086.6	1095	1442.7	1016.9
2088	924.4	1362.5	1234.2
2089.4	887.2	1735.2	1021.8
2090.9	960.3	1379.8	1356.7
2092.3	946.1	1448.1	1178.9
2093.7	970.7	1385.8	1196.2
2095.1	911.8	1543.8	1232.2
2096.5	887.4	1354.1	1212.2
2098	853.3	1471.6	1113.4
2099.4	908.7	1473.3	1205.9
2100.8	971.8	1381.9	1102.4
2102.2	890.1	1478	1179.6
2103.7	885.3	1539.6	1179.3
2105.1	1179.9	1575.1	1134.2
2106.5	970.4	1322.3	1335.9
2107.9	864.3	1211.5	1099.1
2109.4	839.6	1337.9	1270
2110.8	981	1326.9	1196.3
2112.2	1004.9	1310.6	1082.2
2113.6	991	1422.5	1150.5
2115.1	795.6	1330	1164.7
2116.5	1024.6	1344.4	1110.7
2117.9	810.5	1404.7	1251.2
2119.3	1093.9	1374.7	1239.1
2120.8	1053.8	1550.5	1026.3
2122.2	1078.5	1277.2	1359.7
2123.6	1138.2	1395.9	1541.6
2125	930	1450.4	1275
2126.5	955	1337.7	1354.7
2127.9	749	1152.4	1130.6
2129.3	1079.6	1363.4	1111.9
2130.7	1072.9	1239	1130.9
2132.2	934.4	1339.7	1065.9
2133.6	669.8	1363.7	1170
2135	959.3	1205	1286
2136.4	785.9	1538.7	1251.9
2137.9	988.9	1538.6	1347.7
2139.3	847.2	1320.7	1174.6
2140.7	889	1361.3	1178.3
2142.1	868.6	1394.3	1161.3
2143.5	922.4	1621.6	1574.7
2145	968.2	1443.5	1296.1
2146.4	1227.8	1393.7	1436.1
2147.8	1020.4	1347.2	1204.9
2149.2	872.7	1646.5	1066.1
2150.7	934.6	1353.6	1121.1
2152.1	897	1143.7	1219
2153.5	1012.3	1404.4	1287.3
2154.9	835	1470.3	1396.6
2156.4	885.1	1539.4	1117.1
2157.8	805.7	1606.8	1336.4
2159.2	890.9	1497.7	1288.9
2160.6	1103.8	1391.6	1121.6
2162.1	967.7	1434.6	1066.9
2163.5	934.5	1201.1	1069
2164.9	949.6	1588.2	938.4
2166.3	917.2	1541.2	1354.1
2167.8	740	1492.4	1301.8
2169.2	825.1	1481.5	1329.8
2170.6	929.8	1412.2	1319.5
2172	903.8	1375.1	1062.2
2173.5	858.8	1412	1236.8
2174.9	906.9	1314.3	1085.1
2176.3	822.9	1365.2	1217.4
2177.7	1031.4	1348.5	1020.6
2179.2	1008.8	1437.7	1236.7
2180.6	899.2	1325.9	1421.7
2182	873.6	1608.7	1325.7
2183.4	894.5	1410.3	995.5
2184.9	1153.1	1426.8	1155.9
2186.3	924.8	1528.8	1237.6
2187.7	900.9	1436.8	1154.8
2189.1	820.4	1430.3	932.3
2190.6	1042.5	1310.7	1134
2192	1049.8	1477.4	1253
2193.4	1097.7	1353.2	1240.8
2194.8	1101.8	1443.5	1190.7
2196.2	904.9	1448.5	1309.9
2197.7	897.5	1532.2	1220.2
2199.1	1067.4	1683.3	1143.8
2200.5	890.3	1223.1	1306.8
2201.9	954.6	1442	1514.3
2203.4	966	1606.1	1205.4
2204.8	822.4	1226.2	1266.7
2206.2	1005.6	1282.6	1182
2207.6	992.1	1410	1265.1
2209.1	1149.6	1471.6	1195.6
2210.5	1080.2	1246.2	1394.6
2211.9	1081.3	1275.9	1295.7
2213.3	839.3	1520.7	1317.9
2214.8	1028	1452.2	1298.6
2216.2	906.7	1370.5	1159.7
2217.6	779.6	1714.9	1361
2219	1082.8	1263.4	1117
2220.5	969	1336.2	1255.3
2221.9	1082	1547.7	1261.1
2223.3	1038.9	1330.9	1222.7
2224.7	900.3	1433.5	1443.8
2226.2	988.8	1284.8	1058.3
2227.6	937.8	1548.5	918.5
2229	990	1292.3	1267.2
2230.4	958	1640	1140.4
2231.9	980.4	1361.5	1159.2
2233.3	1025.6	1340.6	1246.6
2234.7	1113.4	1500.3	1208.8
2236.1	889.8	1484.4	1457.5
2237.6	1017.8	1260.2	1140.1
2239	1034.9	1188.3	1342.7
2240.4	1043.5	1309.9	1276.7
2241.8	936.3	1279.4	1272.8
2243.2	784.4	1332.2	1086.1
2244.7	834.5	1276.7	1207.9
2246.1	1164	1139.1	1451.1
2247.5	1010	1262.4	1014.5
2248.9	971.2	1366.1	989.4
2250.4	1184.6	1506.1	1249.5
2251.8	896.1	1494.4	1141.3
2253.2	1130.5	1452.5	1316
2254.6	1007.7	1448.5	1138.1
2256.1	1079.3	1665.1	1251.3
2257.5	947.3	1532.7	1157
2258.9	975.4	1374.9	1227
2260.3	1075.1	1270.9	1223.1
2261.8	841.4	1658.7	1256.8
2263.2	1031.6	1376.7	1157.6
2264.6	944.8	1403.8	1406
2266	865.8	1464.8	1306.5
2267.5	985.1	1395.9	1160.5
2268.9	733	1573	1276.2
2270.3	937.4	1398.6	1158.9
2271.7	994.6	1389	1048.5
2273.2	870.6	1240.3	1132.3
2274.6	878.4	1455.4	1361.7
2276	1189.3	1202.5	1240.1
2277.4	1092.3	1410	1441.5
2278.9	1084.5	1390.3	1308.3
2280.3	1137.1	1371.2	1313.2
2281.7	1075.6	1347.1	1075.7
2283.1	1180.8	1418.6	1078.3
2284.6	924.4	1259.8	1227.6
2286	1098.6	1438.6	1048.5
2287.4	1156.9	1183	1215.1
2288.8	865.9	1245.4	925
2290.2	1087.2	1432	1191.5
2291.7	939.2	1547.1	1255.3
2293.1	934.5	1365.4	1321.7
2294.5	953.6	1263.9	1137.5
2295.9	957.8	1633.3	1300.1
2297.4	991.9	1438.4	1116.4
2298.8	937.8	1422.9	1273.3
2300.2	999.3	1392.5	1200.5
2301.6	871.1	1514.8	1481.6
2303.1	922	1202.4	1208.4
2304.5	1133	1303.3	1196.6
2305.9	809.7	1498.7	1286.7
2307.3	1048.7	1564	1188.4
2308.8	915	1615.9	1315.4
2310.2	975.1	1329.9	1306
2311.6	1023.9	1407.6	1107.7
2313	1135.5	1520.9	1108.2
2314.5	1000	1364.7	1047.7
2315.9	862.7	1377.4	1043.4
2317.3	906.9	1343.2	1249.5
2318.7	917.8	1210.6	1082.8
2320.2	1031.2	1372.2	1317.9
2321.6	958.1	1606.5	1236.6
2323	882.5	1336.3	1131
2324.4	865.9	1388.3	1377.4
2325.9	1139.2	1303.2	1170.7
2327.3	1047.9	1435.7	1303.5
2328.7	973.4	1506	1246.6
2330.1	1007.3	1385.3	1244.5
2331.6	940	1239	1381.4
2333	1028.4	1485.2	1144.7
2334.4	1099.3	1333.2	1105.5
2335.8	835.4	1555.4	1218.5
2337.3	877.6	1411.2	1353.3
2338.7	1139.8	1700	1125.3
2340.1	961.3	1287	1302.4
2341.5	1072.9	1413.2	1188.8
2342.9	1046.8	1576.7	1134.4
2344.4	1157	1422.2	1243.8
2345.8	987.6	1572.9	1250.9
2347.2	953.1	1532.8	1355.4
2348.6	879.4	1407.8	1309.4
2350.1	984.6	1352.1	1246.3
2351.5	1206.8	1180.7	1195.5
2352.9	1026.9	1468.6	1145.8
2354.3	856.6	1248.9	1192.8
2355.8	852.7	1610	1282
2357.2	876.9	1386.9	1150
2358.6	1018.8	1662.4	1232.9
2360	1167.3	1379.1	1139.6
2361.5	923.3	1562.2	1356.3
2362.9	1008.6	1289.4	1314.9
2364.3	977.4	1323.3	1214.3
2365.7	1147.7	1587.8	1286.9
2367.2	1059.5	1289.7	1038.7
2368.6	1040.7	1222.2	1242.6
2370	909.1	1254.4	1162.3
2371.4	887.4	1253.9	1199.5
2372.9	1019.6	1258.9	1079.9
2374.3	961.9	1402.3	1415.1
2375.7	1128.3	1616.2	1122.9
2377.1	1021.7	1262.2	1326.3
2378.6	1023.3	1432.7	1354.4
2380	707.1	1319.4	1200.9
2381.4	1082.2	1500.5	1171
2382.8	1123.6	1466.1	1399.6
2384.3	980.7	1413.8	1166.2
2385.7	1271	1270.6	1297.4
2387.1	812	1252.9	1116.7
2388.5	1049.9	1516.2	1159.9
2389.9	970.8	1474.8	1157.3
2391.4	1106.1	1178.1	1331.8
2392.8	888.7	1501.8	1138.6
2394.2	895.5	1361.3	1351
2395.6	873	1451.1	1413.6
2397.1	950.3	1725.8	1073.3
2398.5	983.8	1574.9	1093.7
2399.9	791.1	1384.3	1266.3
2401.3	1097.7	1385.5	1249
2402.8	811.3	1466.1	1104.7
2404.2	926.1	1358.2	985.8
2405.6	1046.8	1415.3	1290.9
2407	996.1	1385.9	1266.7
2408.5	983.2	1514.4	1249.4
2409.9	1071.3	1517.7	979.6
2411.3	879	1407.1	1220.9
2412.7	847.9	1275.7	1306.2
2414.2	1069.7	1261.2	1194.5
2415.6	848.2	1360.4	1216.1
2417	1033.9	1254.9	1167.6
2418.4	1282	1393.7	1182.4
2419.9	1105.8	1482.5	1239.6
2421.3	897.3	1305.5	1315.9
2422.7	912.3	1291	1203.3
2424.1	1029.1	1475.8	1167.3
2425.6	818.9	1472.9	1208.2
2427	978.2	1352.7	1364.2
2428.4	955	1458.6	1114.2
2429.8	954.6	1550.1	1150.4
2431.3	953	1329	1254.1
2432.7	928.3	1370.5	1299.2
2434.1	936.7	1538.5	1261.8
2435.5	949.9	1386.3	1186.5
2437	982.9	1565.2	1365.3
2438.4	1046.9	1384.3	1268.1
2439.8	901.8	1347.4	1213.8
2441.2	950.1	1378.8	1425.7
2442.6	955.9	1538.1	1312.3
2444.1	1076.4	1449.1	1221.9
2445.5	1086.7	1426.1	1447.7
2446.9	968.1	1274	1319.7
2448.3	1085.5	1462.3	1191.3
2449.8	1044.1	1511.7	1260.7
2451.2	855.6	1471.8	1050.6
2452.6	1025.4	1365.6	1191.9
2454	1150.4	1519.2	1217.7
2455.5	1010.9	1426.5	1090.4
2456.9	1031.3	1279.8	1301.2
2458.3	923.1	1510.5	1378.4
2459.7	954.5	1368.9	1316.6
2461.2	1071.2	1297.8	1073
2462.6	785.2	1545.4	1189.9
2464	1118.3	1257.7	1135.3
2465.4	882.1	1579.9	1366.5
2466.9	970	1360.5	1230.5
2468.3	993.1	1481.9	1106
2469.7	982.4	1515.4	1254.7
2471.1	1134.5	1541.4	1151.7
2472.6	1097.1	1292.6	1264.9
2474	730.8	1464.3	1226.3
2475.4	1064.1	1582.2	1278.3
2476.8	885.8	1325.6	1316.7
2478.3	923.2	1557.3	1220.8
2479.7	1096.7	1478.4	1143.6
2481.1	1113.5	1585.2	1354.9
2482.5	956.5	1532.2	1283.6
2484	1025	1610.9	1275.2
2485.4	919.6	1528.3	1345.3
2486.8	984	1452.7	1183.3
2488.2	977	1441.3	1120
2489.6	898.9	1402	1075
2491.1	957	1578.7	1150.5
2492.5	1039.4	1328.7	1213.9
2493.9	1087.6	1545.4	1241.5
2495.3	925.7	1459.7	1077.8
2496.8	959.2	1364.2	1260.2
2498.2	977	1347	1248.2
2499.6	966.5	1509.7	1424.1
2501	914	1650.6	1149.7
2502.5	874.7	1267	1137.5
2503.9	1001.3	1360.7	1195.3
2505.3	868.1	1301.1	1439.1
2506.7	817.7	1518.8	1148
2508.2	876.5	1322.8	1015.3
2509.6	990.5	1489.4	1235.5
2511	971.6	1464.1	1233.2
2512.4	953.5	1425.1	1188.7
2513.9	1069.2	1403.6	1270.1
2515.3	990.2	1553.7	1306.3
2516.7	984.5	1524.1	1051.3
2518.1	938.4	1457.4	1176.8
2519.6	1060.8	1298.5	1161.7
2521	923.7	1411.6	882.1
2522.4	998.9	1334	1160.2
2523.8	973.3	1316.8	1145.8
2525.3	987.2	1450.9	1265.3
2526.7	909.2	1502.2	1231.1
2528.1	939.3	1427.8	1160.7
2529.5	1201.8	1538.7	1234.9
2531	1041.2	1353.6	1174.4
2532.4	1226.1	1412.8	1194.7
2533.8	1009.3	1475.6	1227.5
2535.2	1140.3	1481	1257.4
2536.7	1005.7	1475.6	1015.8
2538.1	1181	1424.8	1123.6
2539.5	978.3	1300.6	1137.1
2540.9	968.1	1364.7	1299.4
2542.3	953.3	1470.5	1113.8
2543.8	1101.8	1383	1362.2
2545.2	822.2	1482.8	1118.7
2546.6	1120.2	1507.9	1366.1
2548	995	1369.7	1239.1
2549.5	1066.9	1253.3	1204
2550.9	694.3	1439.6	1196.1
2552.3	974.4	1274.3	1123.1
2553.7	1098.3	1329.9	1376.8
2555.2	992.9	1411	1134
2556.6	1008.7	1382.1	1163
2558	980.1	1481.1	1130.1
2559.4	942.7	1288.9	1391.2
2560.9	1003.8	1444.7	1000.4
2562.3	1134.9	1221.1	1293.6
2563.7	878.8	1243.6	1133.9
2565.1	911.7	1528.3	1414.4
2566.6	896.7	1365.9	1294.3
2568	906.7	1365.3	1274.3
2569.4	903.8	1239.6	1285.1
2570.8	1005.7	1315.6	1202.4
2572.3	929.3	1443.9	1264.4
2573.7	943.2	1276.8	1191.4
2575.1	950	1331.8	1383.4
2576.5	1061.9	1378.8	1200.7
2578	1025.3	1331.6	1245.7
2579.4	1003.7	1406.3	1239.9
2580.8	1018.4	1291.3	1097.5
2582.2	1022.6	1393.2	1357.3
2583.7	1044.4	1705.8	1196.9
2585.1	994.4	1332.1	1267.5
2586.5	977.2	1482.9	1215.4
2587.9	1065.3	1468.1	1230.5
2589.3	966.1	1486.8	1327.3
2590.8	1117.2	1608.2	1231.8
2592.2	1048.1	1250.5	1376.2
2593.6	887.6	1452	1156.5
2595	979.6	1480.3	1280.6
2596.5	742.8	1370.7	1276.8
2597.9	981.8	1622.2	1207.7
2599.3	924.4	1385.5	1148.4
2600.7	919.5	1425.4	1150.4
2602.2	1039.6	1476.3	1202.6
2603.6	1104.9	1329	1326.4
2605	987.6	1445.8	1212.2
2606.4	1010.9	1359.7	1181.6
2607.9	918.5	1486.2	1008.8
2609.3	1006	1304.7	1181.1
2610.7	787.3	1434.2	1320.9
2612.1	853	1192.2	1144.6
2613.6	1196.9	1426.9	1077.8
2615	896	1301.4	1249.1
2616.4	1172.3	1361.5	1145.2
2617.8	979	1555.2	1196.3
2619.3	924.9	1645.3	1177.5
2620.7	999.2	1585.1	1128.8
2622.1	895.8	1689.4	1151.4
2623.5	942	1470	1405.7
2625	964.8	1544.4	1253.5
2626.4	961.2	1208.5	1082.5
2627.8	968.6	1430.9	1162.3
2629.2	1055.2	1483.8	1272.3
2630.7	1051.6	1462.4	1338.1
2632.1	1052.1	1443.1	1142.4
2633.5	990	1269	1113.4
2634.9	919.8	1366.1	1221.5
2636.4	926.1	1566.6	1007
2637.8	972.3	1425.4	1185.8
2639.2	985.8	1284.6	1167.8
2640.6	854.6	1469	1378.8
2642	977.7	1584	1124.8
2643.5	1111.5	1396.2	1206.3
2644.9	1117.1	1339.5	1188.9
2646.3	978.8	1479.7	1186.2
2647.7	1000.8	1459.6	1092.2
2649.2	1033.8	1430.9	1350.7
2650.6	999.9	1350.9	1081.7
2652	985.5	1573	1195.4
2653.4	1096.8	1496.5	1091.3
2654.9	930.5	1359	1261
2656.3	972.2	1412.3	1355.9
2657.7	985.8	1475.5	1208.2
2659.1	1016.1	1384.4	1208.9
2660.6	829.7	1352.4	1342.1
2662	845.5	1580.2	1229.4
2663.4	1182.7	1713.7	1312.2
2664.8	1206.2	1626.4	1538.6
2666.3	1074.1	1563	1327
2667.7	946.5	1550.3	1193.4
2669.1	1106.7	1696.3	1255.1
2670.5	1063.3	1466.8	1214.9
2672	1001.9	1361.9	1080.6
2673.4	962.8	1404	1193.3
2674.8	902.8	1529.3	1118.9
2676.2	980.6	1310.3	1289.9
2677.7	1093.9	1193	1203.2
2679.1	933.3	1318.4	1173.6
2680.5	1319.4	1265.7	1169.8
2681.9	1148.2	1532.6	1300
2683.4	983.7	1516.4	1121.1
2684.8	1014.1	1485.1	1286.7
2686.2	871.6	1422.2	1269.6
2687.6	833	1636.7	1099.4
2689	980.7	1329.3	1178.1
2690.5	943.3	1615.6	1273.6
2691.9	980.9	1310.6	1255.6
2693.3	800.9	1368.1	1206.8
2694.7	1019.4	1426.3	1311.5
2696.2	1094.4	1302	1167
2697.6	1076.2	1433.8	1213
2699	1044.1	1405.8	1286.7
2700.4	1004	1448.2	1326.6
2701.9	827.7	1263.6	1141.8
2703.3	893.8	1471	1108.1
2704.7	887.4	1527	1339.3
2706.1	1006.4	1332.4	1063.2
2707.6	975.3	1384.7	1257.2
2709	1037.6	1238.9	1220.3
2710.4	948.6	1509.7	1169.3
2711.8	814.7	1356.4	1273.1
2713.3	1113.5	1334.6	1150.9
2714.7	982.9	1289.1	1210
2716.1	847.2	1339.1	1160.4
2717.5	1089.6	1421.8	1106.8
2719	1045.8	1463.1	1030.9
2720.4	957	1198.7	1128.8
2721.8	1087.4	1473.5	1197.1
2723.2	1056.7	1666.5	1277
2724.7	992.3	1371.2	1136.9
2726.1	918.8	1378.9	1414.1
2727.5	957.2	1332.9	1158
2728.9	878.3	1413.6	1216.7
2730.4	982.7	1532.3	1070.3
2731.8	1068.2	1478.8	1307
2733.2	1097.8	1393.6	1066
2734.6	994.4	1526.1	1228.6
2736.1	1120.7	1388.6	1196.7
2737.5	1035.9	1521.9	1264.1
2738.9	1026.9	1424.5	1493.1
2740.3	913.6	1369.9	1314.4
2741.7	1010.8	1288.8	1320.5
2743.2	914.1	1411.6	1112.1
2744.6	985.6	1409.5	1127.8
2746	893	1322.7	1239.8
2747.4	1084.3	1410.8	1281.1
2748.9	1099.5	1434.7	1160.6
2750.3	1083.7	1489.3	1185
2751.7	1063.5	1526.6	1263.4
2753.1	1122.6	1406.5	1255.8
2754.6	980.3	1469.5	1186.7
2756	974.7	1384.9	1126
2757.4	1251.4	1383.7	1314.2
2758.8	821.9	1539.3	1206.1
2760.3	786.4	1559	1347.4
2761.7	947.5	1468.9	1287.9
2763.1	1247.7	1701.1	1213.3
2764.5	1019	1409	1285.2
2766	993.8	1335.5	1181
2767.4	1082.9	1376	1067
2768.8	1099.9	1272.3	1042.5
2770.2	1152.9	1553.4	1168.4
2771.7	981	1527.9	1229.1
2773.1	1062.1	1242.7	1479.9
2774.5	899.9	1388.9	1351.5
2775.9	1038.2	1275.8	1146.3
2777.4	1063.9	1292.6	1271.6
2778.8	1125.8	1430.1	1427.7
2780.2	950.5	1254.3	1250.7
2781.6	1171.4	1296.2	1281.8
2783.1	779.6	1341.3	1258
2784.5	1104.3	1662.6	1104.3
2785.9	979.2	1199.2	1225.4
2787.3	974.7	1246.4	1046.4
2788.7	1364.7	1728.3	1213.3
2790.2	988.4	1493.8	973.9
2791.6	1072.7	1381.8	1369.1
2793	953.6	1388.2	1285.1
2794.4	941.6	1346.7	1133.5
2795.9	1079.1	1588.7	1320.1
2797.3	1100.7	1218.1	1148.1
2798.7	975.4	1184.5	1082
2800.1	1011.8	1447.7	1228.4
2801.6	1131.1	1594	1196
2803	954.1	1649.2	1000.5
2804.4	966.5	1749.2	1347.2
2805.8	916.7	1430.5	1080.7
2807.3	1077.1	1588.3	1413.2
2808.7	1251.2	1502.1	1037.3
2810.1	892.8	1428.7	1207.5
2811.5	1089.3	1368.4	1187.2
2813	1094.9	1423.8	1223.7
2814.4	1052.7	1347.5	1241.4
2815.8	1019.2	1429.3	1104.2
2817.2	1024.5	1600.8	1203.9
2818.7	1034.1	1157.6	1137
2820.1	1048.2	1267	1006.8
2821.5	1020.9	1544.8	1069.4
2822.9	1100.3	1470.1	1274.7
2824.4	860	1425.3	1331.4
2825.8	892.3	1291.2	1081.7
2827.2	1080.9	1340.8	1324.3
2828.6	1078.5	1209	1305.6
2830.1	1075.5	1401.1	1323.4
2831.5	1099.9	1447.4	1329.6
2832.9	928.5	1556.8	1368
2834.3	847.1	1439.5	1309.4
2835.8	1022.3	1575.8	1059.1
2837.2	929	1433.8	1171.1
2838.6	780.5	1396.7	1053.9
2840	1080.1	1626.1	1160.5
2841.4	1179.3	1505.2	1287.8
2842.9	931.4	1258	1022.5
2844.3	899.9	1549.8	1226.8
2845.7	1103.5	1421.2	1391
[truncated: 3,267 more rows]

## Sheet: F5-FS1-B
Individual Dconfocal (um2s-1)					Quinacrine in Hela Cytoplasm
3.5956
2.4427
2.413
2.0617
2.2693
2.5939
2.1402
3.2002
2.7566
2.2123
2.1048
4.2665
3.0807
2.7293
3.7424
2.6801
2.2469
2.6825
2.6187
2.1531
1.7038
2.4829
2.4816
1.7254
2.8811
2.0719
1.9293
2.3798

## Sheet: F5-FS1-C-D
Time axis (re-adjusted)	Pre-Bleach	HeLa Cytoplasm	Quinacrine in Hela Cytoplasm
-12.819	1		combined FRAP profile Normalized
-11.394	1.0316				HeLa Cytoplasm
-9.97	1.0462				Combined Dconfocal (um2s-1)	Standard Error	Percentage error
-8.5457	1.0109				2.5	0.0927235	3.78071
-7.1214	1.0226
-5.6971	1.0342
-4.2729	1.0166
-2.8486	1.0208
-1.4243	1.0797
0		0.11032
1.4243		0.11633
2.8486		0.128
4.2729		0.13051
5.6971		0.13352
7.1214		0.1381
8.5457		0.15406
9.97		0.15089
11.394		0.16683
12.819		0.17467
14.243		0.15641
15.667		0.15706
17.091		0.17415
18.516		0.17713
19.94		0.17272
21.364		0.16539
22.789		0.17386
24.213		0.1886
25.637		0.18585
27.061		0.18393
28.486		0.19186
29.91		0.19074
31.334		0.19424
32.759		0.18638
34.183		0.2044
35.607		0.21044
37.031		0.19633
38.456		0.19747
39.88		0.20929
41.304		0.204
42.729		0.19694
44.153		0.20813
45.577		0.22142
47.001		0.2251
48.426		0.20471
49.85		0.22719
51.274		0.22922
52.699		0.22078
54.123		0.22222
55.547		0.23929
56.971		0.22941
58.396		0.23178
59.82		0.23917
61.244		0.22709
62.669		0.22946
64.093		0.24039
65.517		0.2354
66.941		0.24198
68.366		0.24888
69.79		0.23943
71.214		0.253
72.639		0.23851
74.063		0.25037
75.487		0.26068
76.911		0.23206
78.336		0.24654
79.76		0.26047
81.184		0.24106
82.609		0.25795
84.033		0.24499
85.457		0.25447
86.881		0.26169
88.306		0.26571
89.73		0.26627
91.154		0.26561
92.579		0.26965
94.003		0.28271
95.427		0.27667
96.851		0.2816
98.276		0.28373
99.7		0.26903
101.12		0.27623
102.55		0.28638
103.97		0.27858
105.4		0.28497
106.82		0.29426
108.25		0.29027
109.67		0.29443
111.09		0.28941
112.52		0.29642
113.94		0.29591
115.37		0.29051
116.79		0.29813
118.22		0.30387
119.64		0.29569
121.06		0.29877
122.49		0.30809
123.91		0.29522
125.34		0.29275
126.76		0.29022
128.19		0.29817
129.61		0.30232
131.03		0.30839
132.46		0.30725
133.88		0.30357
135.31		0.30089
136.73		0.31809
138.16		0.31649
139.58		0.31321
141		0.32033
142.43		0.31233
143.85		0.31833
145.28		0.3212
146.7		0.325
148.13		0.32243
149.55		0.31421
150.97		0.31376
152.4		0.32151
153.82		0.31663
155.25		0.31319
156.67		0.31834
158.1		0.32671
159.52		0.32235
160.94		0.32133
162.37		0.32959
163.79		0.3328
165.22		0.33267
166.64		0.33637
168.07		0.33476
169.49		0.32546
170.91		0.3366
172.34		0.32883
173.76		0.33637
175.19		0.33474
176.61		0.33594
178.04		0.34347
179.46		0.33343
180.88		0.35106
182.31		0.34279
183.73		0.34722
185.16		0.34886
186.58		0.36292
188.01		0.34105
189.43		0.35249
190.85		0.34099
192.28		0.35872
193.7		0.35158
195.13		0.35101
196.55		0.35079
197.98		0.35979
199.4		0.36452
200.82		0.35869
202.25		0.33927
203.67		0.34974
205.1		0.36019
206.52		0.35985
207.95		0.34881
209.37		0.36275
210.79		0.37678
212.22		0.35517
213.64		0.36053
215.07		0.36026
216.49		0.36801
217.92		0.37111
219.34		0.36553
220.76		0.38132
222.19		0.38631
223.61		0.36502
225.04		0.37396
226.46		0.38668
227.89		0.37244
229.31		0.38766
230.73		0.38202
232.16		0.37555
233.58		0.38413
235.01		0.37262
236.43		0.38641
237.86		0.38332
239.28		0.37734
240.7		0.38423
242.13		0.38287
243.55		0.37162
244.98		0.39944
246.4		0.3753
247.83		0.38543
249.25		0.40927
250.67		0.38882
252.1		0.38519
253.52		0.40829
254.95		0.39243
256.37		0.39209
257.8		0.37777
259.22		0.39132
260.64		0.38805
262.07		0.39733
263.49		0.38943
264.92		0.3976
266.34		0.39446
267.77		0.39189
269.19		0.39263
270.61		0.41398
272.04		0.37869
273.46		0.39138
274.89		0.39468
276.31		0.38879
277.74		0.40569
279.16		0.4052
280.58		0.41231
282.01		0.39876
283.43		0.39865
284.86		0.40131
286.28		0.41459
287.71		0.40034
289.13		0.40066
290.55		0.4079
291.98		0.38608
293.4		0.41318
294.83		0.39745
296.25		0.41821
297.68		0.42211
299.1		0.41271
300.52		0.42723
301.95		0.42349
303.37		0.41034
304.8		0.4065
306.22		0.42109
307.65		0.41435
309.07		0.41684
310.49		0.39506
311.92		0.42083
313.34		0.42369
314.77		0.4224
316.19		0.41973
317.62		0.41852
319.04		0.41069
320.46		0.42864
321.89		0.4443
323.31		0.43348
324.74		0.4192
326.16		0.42575
327.59		0.42825
329.01		0.43671
330.43		0.42931
331.86		0.4252
333.28		0.43219
334.71		0.41866
336.13		0.44177
337.56		0.43167
338.98		0.43135
340.4		0.42719
341.83		0.42758
343.25		0.43188
344.68		0.42824
346.1		0.4407
347.53		0.43342
348.95		0.43422
350.37		0.41944
351.8		0.45047
353.22		0.4174
354.65		0.42693
356.07		0.43747
357.5		0.43848
358.92		0.43058
360.34		0.42669
361.77		0.43916
363.19		0.42733
364.62		0.45154
366.04		0.44716
367.47		0.43298
368.89		0.434
370.31		0.44509
371.74		0.44829
373.16		0.43173
374.59		0.45421
376.01		0.44338
377.44		0.43025
378.86		0.45027
380.28		0.44512
381.71		0.44943
383.13		0.46023
384.56		0.46083
385.98		0.44564
387.41		0.45904
388.83		0.44919
390.25		0.45302
391.68		0.46638
393.1		0.45876
394.53		0.46337
395.95		0.45254
397.38		0.45124
398.8		0.46083
400.22		0.45395
401.65		0.45149
403.07		0.44297
404.5		0.45147
405.92		0.49538
407.35		0.45816
408.77		0.45546
410.19		0.45559
411.62		0.45807
413.04		0.46002
414.47		0.45966
415.89		0.48078
417.32		0.45894
418.74		0.46166
420.16		0.45605
421.59		0.46521
423.01		0.4663
424.44		0.45188
425.86		0.4606
427.29		0.47177
428.71		0.46308
430.13		0.46462
431.56		0.47443
432.98		0.46395
434.41		0.46566
435.83		0.46746
437.26		0.46238
438.68		0.45634
440.1		0.47333
441.53		0.47797
442.95		0.47101
444.38		0.48
445.8		0.46393
447.23		0.46125
448.65		0.46383
450.07		0.46045
451.5		0.47723
452.92		0.47391
454.35		0.4616
455.77		0.47469
457.2		0.48077
458.62		0.48125
460.04		0.46168
461.47		0.46378
462.89		0.47836
464.32		0.46432
465.74		0.47876
467.17		0.46942
468.59		0.46537
470.01		0.462
471.44		0.46468
472.86		0.47715
474.29		0.48225
475.71		0.48777
477.14		0.47849
478.56		0.4887
479.98		0.47689
481.41		0.47241
482.83		0.48019
484.26		0.46355
485.68		0.50129
487.11		0.48256
488.53		0.48672
489.95		0.49355
491.38		0.47893
492.8		0.48358
494.23		0.4719
495.65		0.49349
497.08		0.48564
498.5		0.49006
499.92		0.48403
501.35		0.48326
502.77		0.48352
504.2		0.49034
505.62		0.49735
507.05		0.48637
508.47		0.4856
509.89		0.49404
511.32		0.46565
512.74		0.48633
514.17		0.4912
515.59		0.48616
517.02		0.4761
518.44		0.47952
519.86		0.49515
521.29		0.49936
522.71		0.48456
524.14		0.4813
525.56		0.49737
526.99		0.4914
528.41		0.49726
529.83		0.49783
531.26		0.50369
532.68		0.51494
534.11		0.49232
535.53		0.48867
536.96		0.4898
538.38		0.49067
539.8		0.48507
541.23		0.50719
542.65		0.50258
544.08		0.49791
545.5		0.50475
546.93		0.49332
548.35		0.50508
549.77		0.50118
551.2		0.51116
552.62		0.50059
554.05		0.51163
555.47		0.50839
556.9		0.50698
558.32		0.49033
559.74		0.50448
561.17		0.49238
562.59		0.50041
564.02		0.50889
565.44		0.49725
566.87		0.49033
568.29		0.49655
569.71		0.49864
571.14		0.51579
572.56		0.5058
573.99		0.50411
575.41		0.49088
576.84		0.49936
578.26		0.49428
579.68		0.50839
581.11		0.49925
582.53		0.49484
583.96		0.51035
585.38		0.50828
586.81		0.51747
588.23		0.50325
589.65		0.50103
591.08		0.52167
592.5		0.50655
593.93		0.51106
595.35		0.50821
596.78		0.50269
598.2		0.50327
599.62		0.51441
601.05		0.51474
602.47		0.50621
603.9		0.50245
605.32		0.50373
606.75		0.51981
608.17		0.52891
609.59		0.50718
611.02		0.50503
612.44		0.51366
613.87		0.51637
615.29		0.5216
616.72		0.51229
618.14		0.52685
619.56		0.50832
620.99		0.51002
622.41		0.50313
623.84		0.50906
625.26		0.51615
626.69		0.51669
628.11		0.51698
629.53		0.5108
630.96		0.5192
632.38		0.51831
633.81		0.5319
635.23		0.51049
636.66		0.51778
638.08		0.52503
639.5		0.52444
640.93		0.53281
642.35		0.50792
643.78		0.51142
645.2		0.52186
646.63		0.50167
648.05		0.50752
649.47		0.5315
650.9		0.52302
652.32		0.53541
653.75		0.51723
655.17		0.52688
656.6		0.52144
658.02		0.52598
659.44		0.5203
660.87		0.51268
662.29		0.52508
663.72		0.53069
665.14		0.52364
666.57		0.52925
667.99		0.53067
669.41		0.53457
670.84		0.52491
672.26		0.53353
673.69		0.51384
675.11		0.52642
676.54		0.53469
677.96		0.53269
679.38		0.53541
680.81		0.52316
682.23		0.50444
683.66		0.52204
685.08		0.51517
686.51		0.51256
687.93		0.53958
689.35		0.54114
690.78		0.53941
692.2		0.51836
693.63		0.54272
695.05		0.52973
696.48		0.52438
697.9		0.52764
699.32		0.52744
700.75		0.53275
702.17		0.52926
703.6		0.545
705.02		0.54016
706.45		0.54362
707.87		0.52566
709.29		0.52472
710.72		0.55608
712.14		0.54047
713.57		0.55535
714.99		0.5457
716.42		0.54299
717.84		0.54324
719.26		0.52353
720.69		0.52841
722.11		0.53322
723.54		0.53066
724.96		0.52924
726.39		0.53766
727.81		0.5371
729.23		0.52952
730.66		0.5304
732.08		0.53772
733.51		0.54052
734.93		0.52492
736.36		0.53933
737.78		0.53042
739.2		0.52667
740.63		0.54579
742.05		0.54182
743.48		0.54939
744.9		0.55818
746.33		0.54168
747.75		0.56434
749.17		0.53454
750.6		0.54309
752.02		0.56637
753.45		0.54402
754.87		0.5327
756.3		0.54571
757.72		0.53931
759.14		0.54491
760.57		0.5421
761.99		0.55762
763.42		0.54169
764.84		0.55155
766.27		0.57278
767.69		0.53676
769.11		0.54268
770.54		0.53604
771.96		0.52936
773.39		0.55095
774.81		0.53062
776.24		0.55086
777.66		0.5549
779.08		0.55396
780.51		0.53348
781.93		0.54489
783.36		0.56075
784.78		0.54816
786.21		0.53898
787.63		0.53117
789.05		0.558
790.48		0.54404
791.9		0.55115
793.33		0.55081
794.75		0.54461
796.18		0.54436
797.6		0.5436
799.02		0.54797
800.45		0.55963
801.87		0.54655
803.3		0.55844
804.72		0.52544
806.15		0.55879
807.57		0.56845
808.99		0.55254
810.42		0.54406
811.84		0.54284
813.27		0.55623
814.69		0.55215
816.12		0.54555
817.54		0.53475
818.96		0.55779
820.39		0.54375
821.81		0.54384
823.24		0.55645
824.66		0.56583
826.09		0.56991
827.51		0.53921
828.93		0.55907
830.36		0.55181
831.78		0.56146
833.21		0.54806
834.63		0.559
836.06		0.56066
837.48		0.54245
838.9		0.53887
840.33		0.55129
841.75		0.55295
843.18		0.56659
844.6		0.55286
846.03		0.57524
847.45		0.55381
848.87		0.56712
850.3		0.56491
851.72		0.55565
853.15		0.56993
854.57		0.55727
856		0.55064
857.42		0.55918
858.84		0.56079
860.27		0.55308
861.69		0.56043
863.12		0.5403
864.54		0.5689
865.97		0.5663
867.39		0.55009
868.81		0.56006
870.24		0.55623
871.66		0.56062
873.09		0.55525
874.51		0.55422
875.94		0.55695
877.36		0.56321
878.78		0.57014
880.21		0.57224
881.63		0.56015
883.06		0.58394
884.48		0.56121
885.91		0.57088
887.33		0.58312
888.75		0.55245
890.18		0.57446
891.6		0.55907
893.03		0.55217
894.45		0.55994
895.88		0.56449
897.3		0.55279
898.72		0.55349
900.15		0.5614
901.57		0.56496
903		0.554
904.42		0.56348
905.85		0.56322
907.27		0.56138
908.69		0.54965
910.12		0.56375
911.54		0.56661
912.97		0.55821
914.39		0.56706
915.82		0.56949
917.24		0.59073
918.66		0.57879
920.09		0.55651
921.51		0.57192
922.94		0.55964
924.36		0.5646
925.79		0.56972
927.21		0.57628
928.63		0.56717
930.06		0.57917
931.48		0.56193
932.91		0.57366
934.33		0.58102
935.76		0.54843
937.18		0.58382
938.6		0.56411
940.03		0.57147
941.45		0.56777
942.88		0.54669
944.3		0.56852
945.73		0.5769
947.15		0.56726
948.57		0.57554
950		0.57925
951.42		0.5537
952.85		0.56422
954.27		0.57875
955.7		0.596
957.12		0.58166
958.54		0.57427
959.97		0.55382
961.39		0.56939
962.82		0.58375
964.24		0.56778
965.67		0.57708
967.09		0.58256
968.51		0.58415
969.94		0.58159
971.36		0.58652
972.79		0.58727
974.21		0.57733
975.64		0.56498
977.06		0.57048
978.48		0.56718
979.91		0.55856
981.33		0.58477
982.76		0.56067
984.18		0.57489
985.61		0.56635
987.03		0.57333
988.45		0.57733
989.88		0.577
991.3		0.5772
992.73		0.57524
994.15		0.56746
995.58		0.5898
997		0.57793
998.42		0.55797
999.85		0.57553
1001.3		0.58947
1002.7		0.59121
1004.1		0.58318
1005.5		0.58394
1007		0.59782
1008.4		0.57402
1009.8		0.57125
1011.2		0.58152
1012.7		0.57818
1014.1		0.56834
1015.5		0.58729
1016.9		0.57254
1018.4		0.56842
1019.8		0.57059
1021.2		0.57192
1022.6		0.57568
1024.1		0.59102
1025.5		0.56683
1026.9		0.60117
1028.3		0.57974
1029.8		0.59376
1031.2		0.58863
1032.6		0.57525
1034		0.57629
1035.5		0.58421
1036.9		0.56462
1038.3		0.58396
1039.7		0.59191
1041.2		0.58805
1042.6		0.57937
1044		0.5845
1045.4		0.58399
1046.8		0.5771
1048.3		0.5792
1049.7		0.57675
1051.1		0.57835
1052.5		0.57304
1054		0.59781
1055.4		0.5628
1056.8		0.58446
1058.2		0.56798
1059.7		0.58704
1061.1		0.59116
1062.5		0.59138
1063.9		0.56416
1065.4		0.60071
1066.8		0.56158
1068.2		0.58492
1069.6		0.59308
1071.1		0.58456
1072.5		0.58747
1073.9		0.60121
1075.3		0.58514
1076.8		0.59086
1078.2		0.58538
1079.6		0.57952
1081		0.58999
1082.5		0.59154
1083.9		0.59031
1085.3		0.59401
1086.7		0.5769
1088.2		0.58189
1089.6		0.59716
1091		0.5972
1092.4		0.58952
1093.9		0.58839
1095.3		0.59382
1096.7		0.60436
1098.1		0.583
1099.5		0.5862
1101		0.58219
1102.4		0.57286
1103.8		0.59185
1105.2		0.60043
1106.7		0.58792
1108.1		0.59982
1109.5		0.59581
1110.9		0.58929
1112.4		0.59301
1113.8		0.59124
1115.2		0.59032
1116.6		0.59187
1118.1		0.59141
1119.5		0.60303
1120.9		0.57863
1122.3		0.59924
1123.8		0.58971
1125.2		0.60383
1126.6		0.60859
1128		0.59994
1129.5		0.58343
1130.9		0.58485
1132.3		0.59464
1133.7		0.59902
1135.2		0.58594
1136.6		0.595
1138		0.59506
1139.4		0.6057
1140.9		0.57243
1142.3		0.58938
1143.7		0.59302
1145.1		0.59285
1146.5		0.59421
1148		0.59793
1149.4		0.58355
1150.8		0.60189
1152.2		0.58739
1153.7		0.59626
1155.1		0.60799
1156.5		0.58376
1157.9		0.5992
1159.4		0.59693
1160.8		0.60846
1162.2		0.5795
1163.6		0.59844
1165.1		0.60667
1166.5		0.58884
1167.9		0.61383
1169.3		0.60374
1170.8		0.59968
1172.2		0.6034
1173.6		0.5943
1175		0.59644
1176.5		0.59475
1177.9		0.58599
1179.3		0.59404
1180.7		0.59127
1182.2		0.58438
1183.6		0.5749
1185		0.60944
1186.4		0.59431
1187.9		0.62151
1189.3		0.60681
1190.7		0.60033
1192.1		0.61344
1193.6		0.6084
1195		0.59394
1196.4		0.60325
1197.8		0.61917
1199.2		0.58814
1200.7		0.58557
1202.1		0.61056
1203.5		0.59544
1204.9		0.60896
1206.4		0.59367
1207.8		0.61537
1209.2		0.59828
1210.6		0.59359
1212.1		0.59808
1213.5		0.60771
1214.9		0.5928
1216.3		0.62248
1217.8		0.5969
1219.2		0.62379
1220.6		0.60431
1222		0.5936
1223.5		0.61272
1224.9		0.59595
1226.3		0.59105
1227.7		0.59804
1229.2		0.60209
1230.6		0.57787
1232		0.60499
1233.4		0.61183
1234.9		0.60248
1236.3		0.60989
1237.7		0.61127
1239.1		0.60838
1240.6		0.60468
1242		0.60146
1243.4		0.58277
1244.8		0.59627
1246.2		0.6082
1247.7		0.60704
1249.1		0.60585
1250.5		0.61113
1251.9		0.62825
1253.4		0.59521
1254.8		0.60266
1256.2		0.60968
1257.6		0.59563
1259.1		0.61343
1260.5		0.60712
1261.9		0.58942
1263.3		0.59785
1264.8		0.60746
1266.2		0.59572
1267.6		0.59838
1269		0.59255
1270.5		0.59386
1271.9		0.60705
1273.3		0.61487
1274.7		0.61516
1276.2		0.59493
1277.6		0.60936
1279		0.59657
1280.4		0.60331
1281.9		0.61566
1283.3		0.60563
1284.7		0.61902
1286.1		0.60002
1287.6		0.59951
1289		0.63993
1290.4		0.61734
1291.8		0.60968
1293.3		0.61789
1294.7		0.61169
1296.1		0.62928
1297.5		0.60001
1298.9		0.61141
1300.4		0.61339
1301.8		0.61005
1303.2		0.61883
1304.6		0.59122
1306.1		0.59242
1307.5		0.62665
1308.9		0.61327
1310.3		0.61982
1311.8		0.60023
1313.2		0.60966
1314.6		0.61642
1316		0.60299
1317.5		0.59891
1318.9		0.61815
1320.3		0.63521
1321.7		0.60893
1323.2		0.61009
1324.6		0.62186
1326		0.62792
1327.4		0.61791
1328.9		0.60885
1330.3		0.60891
1331.7		0.62512
1333.1		0.62274
1334.6		0.61011
1336		0.61562
1337.4		0.61449
1338.8		0.61521
1340.3		0.62531
1341.7		0.61
1343.1		0.61547
1344.5		0.61038
1345.9		0.60819
1347.4		0.62205
1348.8		0.60079
1350.2		0.6156
1351.6		0.61021
1353.1		0.62256
1354.5		0.62901
1355.9		0.6139
1357.3		0.61746
1358.8		0.6145
1360.2		0.60572
1361.6		0.61222
1363		0.60891
1364.5		0.61488
1365.9		0.63081
1367.3		0.62331
1368.7		0.62027
1370.2		0.6104
1371.6		0.60916
1373		0.60703
1374.4		0.59646
1375.9		0.61163
1377.3		0.6119
1378.7		0.63382
1380.1		0.61817
1381.6		0.60592
1383		0.60908
1384.4		0.61994
1385.8		0.61779
1387.3		0.62044
1388.7		0.60908
1390.1		0.61086
1391.5		0.59712
1393		0.61244
1394.4		0.63103
1395.8		0.61853
1397.2		0.61873
1398.6		0.65758
1400.1		0.63191
1401.5		0.60926
1402.9		0.62592
1404.3		0.61889
1405.8		0.61766
1407.2		0.62111
1408.6		0.61953
1410		0.62056
1411.5		0.62006
1412.9		0.61534
1414.3		0.62397
1415.7		0.61791
1417.2		0.61725
1418.6		0.61343
1420		0.63702
1421.4		0.62152
1422.9		0.64537
1424.3		0.61582
1425.7		0.63201
1427.1		0.60491
1428.6		0.61454
1430		0.63284
1431.4		0.62802
1432.8		0.60634
1434.3		0.60632
1435.7		0.60045
1437.1		0.64244
1438.5		0.62387
1440		0.6238
1441.4		0.62536
1442.8		0.63856
1444.2		0.63683
1445.6		0.61551
1447.1		0.62399
1448.5		0.62756
1449.9		0.61707
1451.3		0.6122
1452.8		0.60482
1454.2		0.61308
1455.6		0.62325
1457		0.62972
1458.5		0.61823
1459.9		0.63752
1461.3		0.63553
1462.7		0.61813
1464.2		0.60983
1465.6		0.60239
1467		0.63207
1468.4		0.62247
1469.9		0.60561
1471.3		0.63533
1472.7		0.64138
1474.1		0.61261
1475.6		0.61282
1477		0.62829
1478.4		0.62263
1479.8		0.61579
1481.3		0.62839
1482.7		0.61745
1484.1		0.6061
1485.5		0.61228
1487		0.63168
1488.4		0.62075
1489.8		0.6329
1491.2		0.61456
1492.7		0.61012
1494.1		0.62878
1495.5		0.61846
1496.9		0.60606
1498.3		0.65622
1499.8		0.63003
1501.2		0.66106
1502.6		0.61576
1504		0.62306
1505.5		0.63594
1506.9		0.62666
1508.3		0.6313
1509.7		0.62645
1511.2		0.63847
1512.6		0.61831
1514		0.63342
1515.4		0.61718
1516.9		0.61734
1518.3		0.61818
1519.7		0.62138
1521.1		0.62078
1522.6		0.61704
1524		0.63264
1525.4		0.62778
1526.8		0.6297
1528.3		0.61383
1529.7		0.63676
1531.1		0.63595
1532.5		0.62893
1534		0.64216
1535.4		0.60934
1536.8		0.62785
1538.2		0.6276
1539.7		0.62083
1541.1		0.61756
1542.5		0.61751
1543.9		0.62556
1545.3		0.62722
1546.8		0.63612
1548.2		0.61295
1549.6		0.64154
1551		0.63554
1552.5		0.6216
1553.9		0.63119
1555.3		0.63663
1556.7		0.62048
1558.2		0.63299
1559.6		0.64286
1561		0.63473
1562.4		0.63006
1563.9		0.62731
1565.3		0.62048
1566.7		0.62097
1568.1		0.61384
1569.6		0.64824
1571		0.61445
1572.4		0.60964
1573.8		0.64987
1575.3		0.63357
1576.7		0.63473
1578.1		0.62497
1579.5		0.61475
1581		0.6443
1582.4		0.63389
1583.8		0.65566
1585.2		0.63625
1586.7		0.63422
1588.1		0.63446
1589.5		0.6366
1590.9		0.63398
1592.4		0.61952
1593.8		0.61321
1595.2		0.64819
1596.6		0.62019
1598		0.63176
1599.5		0.63232
1600.9		0.63265
1602.3		0.63252
1603.7		0.61557
1605.2		0.62845
1606.6		0.62737
1608		0.64467
1609.4		0.63617
1610.9		0.6206
1612.3		0.64194
1613.7		0.62967
1615.1		0.63579
1616.6		0.6422
1618		0.63507
1619.4		0.62514
1620.8		0.61961
1622.3		0.61505
1623.7		0.63862
1625.1		0.64557
1626.5		0.64163
1628		0.62498
1629.4		0.62766
1630.8		0.6428
1632.2		0.63287
1633.7		0.6408
1635.1		0.63054
1636.5		0.64874
1637.9		0.63902
1639.4		0.65642
1640.8		0.64988
1642.2		0.64654
1643.6		0.63064
1645		0.63937
1646.5		0.65536
1647.9		0.64067
1649.3		0.63791
1650.7		0.62635
1652.2		0.63527
1653.6		0.63314
1655		0.6342
1656.4		0.62146
1657.9		0.65321
1659.3		0.63566
1660.7		0.64939
1662.1		0.62666
1663.6		0.64403
1665		0.63189
1666.4		0.6257
1667.8		0.6356
1669.3		0.65254
1670.7		0.64816
1672.1		0.64537
1673.5		0.62231
1675		0.64022
1676.4		0.65249
1677.8		0.63161
1679.2		0.63535
1680.7		0.64265
1682.1		0.64092
1683.5		0.64128
1684.9		0.61305
1686.4		0.62839
1687.8		0.64469
1689.2		0.6374
1690.6		0.62606
1692.1		0.64637
1693.5		0.64533
1694.9		0.64227
1696.3		0.63661
1697.7		0.64567
1699.2		0.63568
1700.6		0.64119
1702		0.62523
1703.4		0.65887
1704.9		0.62401
1706.3		0.62715
1707.7		0.63501
1709.1		0.65164
1710.6		0.63336
1712		0.64437
1713.4		0.63891
1714.8		0.64089
1716.3		0.63638
1717.7		0.64131
1719.1		0.63454
1720.5		0.62992
1722		0.64154
1723.4		0.63671
1724.8		0.64383
1726.2		0.64429
1727.7		0.64269
1729.1		0.62065
1730.5		0.64887
1731.9		0.65534
1733.4		0.65333
1734.8		0.62937
1736.2		0.65788
1737.6		0.66316
1739.1		0.63114
1740.5		0.64647
1741.9		0.65968
1743.3		0.65402
1744.7		0.63169
1746.2		0.63372
1747.6		0.64112
1749		0.63645
1750.4		0.63675
1751.9		0.64527
1753.3		0.63629
1754.7		0.64529
1756.1		0.66029
1757.6		0.62669
1759		0.65191
1760.4		0.64897
1761.8		0.6498
1763.3		0.64268
1764.7		0.64843
1766.1		0.64382
1767.5		0.64544
1769		0.64347
1770.4		0.62672
1771.8		0.6346
1773.2		0.64678
1774.7		0.6371
1776.1		0.63809
1777.5		0.6389
1778.9		0.66394
1780.4		0.64963
1781.8		0.65783
1783.2		0.65034
1784.6		0.64482
1786.1		0.64438
1787.5		0.64804
1788.9		0.65466
1790.3		0.65854
1791.8		0.66376
1793.2		0.66586
1794.6		0.65602
1796		0.63691
1797.4		0.63752
1798.9		0.64721
1800.3		0.65054
1801.7		0.66261
1803.1		0.6494
1804.6		0.64516
1806		0.64044
1807.4		0.64836
1808.8		0.64292
1810.3		0.64411
1811.7		0.64493
1813.1		0.63609
1814.5		0.64288
1816		0.66006
1817.4		0.63049
1818.8		0.64419
1820.2		0.6628
1821.7		0.6541
1823.1		0.63063
1824.5		0.64413
1825.9		0.64235
1827.4		0.63943
1828.8		0.65517
1830.2		0.65625
1831.6		0.65648
1833.1		0.66698
1834.5		0.65264
1835.9		0.65386
1837.3		0.66435
1838.8		0.65585
1840.2		0.66107
1841.6		0.65321
1843		0.63554
1844.4		0.65396
1845.9		0.6495
1847.3		0.64967
1848.7		0.66175
1850.1		0.66184
1851.6		0.66336
1853		0.62883
1854.4		0.65185
1855.8		0.6546
1857.3		0.67389
1858.7		0.66251
1860.1		0.65367
1861.5		0.63381
1863		0.63484
1864.4		0.6424
1865.8		0.64735
1867.2		0.6447
1868.7		0.66262
1870.1		0.64743
1871.5		0.65895
1872.9		0.63556
1874.4		0.65282
1875.8		0.64805
1877.2		0.65729
1878.6		0.66008
1880.1		0.64661
1881.5		0.63983
1882.9		0.64489
1884.3		0.65265
1885.8		0.64324
1887.2		0.65738
1888.6		0.6435
1890		0.63524
1891.5		0.64982
1892.9		0.67452
1894.3		0.65292
1895.7		0.63552
1897.1		0.65953
1898.6		0.6606
1900		0.67672
1901.4		0.66649
1902.8		0.6611
1904.3		0.65404
1905.7		0.65729
1907.1		0.67034
1908.5		0.6499
1910		0.6728
1911.4		0.64502
1912.8		0.65109
1914.2		0.64565
1915.7		0.65345
1917.1		0.66355
1918.5		0.68077
1919.9		0.65907
1921.4		0.65191
1922.8		0.64932
1924.2		0.65958
1925.6		0.65049
1927.1		0.66487
1928.5		0.64295
1929.9		0.65208
1931.3		0.65101
1932.8		0.6632
1934.2		0.65066
1935.6		0.67856
1937		0.63406
1938.5		0.64953
1939.9		0.64122
1941.3		0.65558
1942.7		0.66224
1944.1		0.6446
1945.6		0.64861
1947		0.67538
1948.4		0.65913
1949.8		0.64682
1951.3		0.65744
1952.7		0.64103
1954.1		0.65421
1955.5		0.6606
1957		0.67612
1958.4		0.67351
1959.8		0.67161
1961.2		0.64702
1962.7		0.6808
1964.1		0.63518
1965.5		0.67198
1966.9		0.66798
1968.4		0.66388
1969.8		0.6499
1971.2		0.64942
1972.6		0.65502
1974.1		0.66151
1975.5		0.65784
1976.9		0.65754
1978.3		0.67058
1979.8		0.6741
1981.2		0.65815
1982.6		0.66329
1984		0.64567
1985.5		0.6678
1986.9		0.66864
1988.3		0.66201
1989.7		0.65399
1991.2		0.65426
1992.6		0.67744
1994		0.67589
1995.4		0.67298
1996.8		0.65658
1998.3		0.65539
1999.7		0.6701
2001.1		0.66954
2002.5		0.65513
2004		0.63871
2005.4		0.65269
2006.8		0.65511
2008.2		0.65154
2009.7		0.64301
2011.1		0.66314
2012.5		0.6631
2013.9		0.66318
2015.4		0.653
2016.8		0.66401
2018.2		0.66227
2019.6		0.65114
2021.1		0.66914
2022.5		0.65754
2023.9		0.65787
2025.3		0.63893
2026.8		0.6637
2028.2		0.63725
2029.6		0.67395
2031		0.66723
2032.5		0.64971
2033.9		0.66213
2035.3		0.65357
2036.7		0.64457
2038.2		0.66301
2039.6		0.66146
2041		0.65532
2042.4		0.67393
2043.8		0.67209
2045.3		0.65513
2046.7		0.67759
2048.1		0.68076
2049.5		0.66255
2051		0.6665
2052.4		0.66022
2053.8		0.64981
2055.2		0.65308
2056.7		0.66358
2058.1		0.65051
2059.5		0.6636
2060.9		0.64985
2062.4		0.66833
2063.8		0.67364
2065.2		0.64791
2066.6		0.67166
2068.1		0.6599
2069.5		0.66291
2070.9		0.665
2072.3		0.66497
2073.8		0.66312
2075.2		0.65176
2076.6		0.66253
2078		0.66677
2079.5		0.64794
2080.9		0.66561
2082.3		0.6591
2083.7		0.65834
2085.2		0.66235
2086.6		0.66636
2088		0.64469
2089.4		0.67777
2090.9		0.66065
2092.3		0.6636
2093.7		0.66286
2095.1		0.65234
2096.5		0.65509
2098		0.67146
2099.4		0.66671
2100.8		0.64853
2102.2		0.66338
2103.7		0.69221
2105.1		0.6626
2106.5		0.65249
2107.9		0.65701
2109.4		0.67709
2110.8		0.63825
2112.2		0.67216
2113.6		0.66204
2115.1		0.66845
2116.5		0.65756
2117.9		0.65848
2119.3		0.66701
2120.8		0.67738
2122.2		0.65864
2123.6		0.66701
2125		0.6672
2126.5		0.66291
2127.9		0.62515
2129.3		0.66162
2130.7		0.6563
2132.2		0.66462
2133.6		0.6364
2135		0.66089
2136.4		0.67017
2137.9		0.6972
2139.3		0.67547
2140.7		0.65206
2142.1		0.6481
2143.5		0.65483
2145		0.65902
2146.4		0.68191
2147.8		0.65751
2149.2		0.66767
2150.7		0.68509
2152.1		0.66605
2153.5		0.66653
2154.9		0.65162
2156.4		0.67904
2157.8		0.68977
2159.2		0.64533
2160.6		0.67338
2162.1		0.66224
2163.5		0.65025
2164.9		0.66963
2166.3		0.6761
2167.8		0.66644
2169.2		0.67758
2170.6		0.66006
2172		0.65385
2173.5		0.65867
2174.9		0.64717
2176.3		0.66471
2177.7		0.66127
2179.2		0.67065
2180.6		0.66278
2182		0.66876
2183.4		0.65742
2184.9		0.66912
2186.3		0.65674
2187.7		0.64246
2189.1		0.66423
2190.6		0.64971
2192		0.66976
2193.4		0.66381
2194.8		0.65156
2196.2		0.66282
2197.7		0.68581
2199.1		0.66706
2200.5		0.65342
2201.9		0.67406
2203.4		0.67995
2204.8		0.67136
2206.2		0.66841
2207.6		0.66987
2209.1		0.68652
2210.5		0.65783
2211.9		0.6695
2213.3		0.68033
2214.8		0.65856
2216.2		0.66549
2217.6		0.68494
2219		0.66598
2220.5		0.6627
2221.9		0.67905
2223.3		0.65613
2224.7		0.67933
2226.2		0.68148
2227.6		0.67631
2229		0.6476
2230.4		0.66235
2231.9		0.67389
2233.3		0.66867
2234.7		0.66502
2236.1		0.68314
2237.6		0.6498
2239		0.67147
2240.4		0.66951
2241.8		0.6724
2243.2		0.6631
2244.7		0.66903
2246.1		0.65975
2247.5		0.65678
2248.9		0.64931
2250.4		0.65788
2251.8		0.67209
2253.2		0.68077
2254.6		0.66758
2256.1		0.65576
2257.5		0.67372
2258.9		0.6932
2260.3		0.68144
2261.8		0.67178
2263.2		0.66339
2264.6		0.70071
2266		0.65864
2267.5		0.66496
2268.9		0.67754
2270.3		0.67635
2271.7		0.66177
2273.2		0.67063
2274.6		0.65206
2276		0.65428
2277.4		0.67778
2278.9		0.67847
2280.3		0.65651
2281.7		0.65418
2283.1		0.68175
2284.6		0.65915
2286		0.6641
2287.4		0.68027
2288.8		0.66192
2290.2		0.66429
2291.7		0.6575
2293.1		0.66792
2294.5		0.66017
2295.9		0.69355
2297.4		0.66138
2298.8		0.66879
2300.2		0.66633
2301.6		0.68595
2303.1		0.66945
2304.5		0.65481
2305.9		0.67224
2307.3		0.66715
2308.8		0.66121
2310.2		0.66733
2311.6		0.68782
2313		0.68472
2314.5		0.67133
2315.9		0.67126
2317.3		0.67307
2318.7		0.68127
2320.2		0.68447
2321.6		0.67855
2323		0.66597
2324.4		0.68484
2325.9		0.67611
2327.3		0.6902
2328.7		0.67004
2330.1		0.68941
2331.6		0.67433
2333		0.67517
2334.4		0.68242
2335.8		0.66148
2337.3		0.68994
2338.7		0.69639
2340.1		0.66539
2341.5		0.6762
2342.9		0.67159
2344.4		0.68584
2345.8		0.67054
2347.2		0.68343
2348.6		0.69079
2350.1		0.66545
2351.5		0.6703
2352.9		0.66797
2354.3		0.67513
2355.8		0.6684
2357.2		0.67746
2358.6		0.68307
2360		0.68272
2361.5		0.67732
2362.9		0.65437
2364.3		0.65907
2365.7		0.6889
2367.2		0.65908
2368.6		0.67722
2370		0.66989
2371.4		0.66926
2372.9		0.66462
2374.3		0.68189
2375.7		0.67458
2377.1		0.68139
2378.6		0.70051
2380		0.68515
2381.4		0.65972
2382.8		0.69557
2384.3		0.68482
2385.7		0.67752
2387.1		0.65797
2388.5		0.68233
2389.9		0.66618
2391.4		0.66568
2392.8		0.68314
2394.2		0.68181
2395.6		0.68585
2397.1		0.67787
2398.5		0.68087
2399.9		0.67796
2401.3		0.66739
2402.8		0.66724
2404.2		0.67127
2405.6		0.68499
2407		0.68408
2408.5		0.67825
2409.9		0.68256
2411.3		0.66857
2412.7		0.68629
2414.2		0.68057
2415.6		0.65969
2417		0.67305
2418.4		0.68365
2419.9		0.6897
2421.3		0.67835
2422.7		0.6553
2424.1		0.67754
2425.6		0.66217
2427		0.68709
2428.4		0.68169
2429.8		0.68743
2431.3		0.68276
2432.7		0.6898
2434.1		0.67553
2435.5		0.68366
2437		0.68773
2438.4		0.68137
2439.8		0.67528
2441.2		0.70554
2442.6		0.67694
2444.1		0.67821
2445.5		0.68452
2446.9		0.65748
2448.3		0.66784
2449.8		0.67658
2451.2		0.67355
2452.6		0.68
2454		0.68962
2455.5		0.68797
2456.9		0.66458
2458.3		0.68577
2459.7		0.68494
2461.2		0.70261
2462.6		0.66211
2464		0.65242
2465.4		0.69586
2466.9		0.69623
2468.3		0.67577
2469.7		0.6753
2471.1		0.68153
2472.6		0.67903
2474		0.67161
2475.4		0.67564
2476.8		0.65876
2478.3		0.69283
2479.7		0.68371
2481.1		0.67712
2482.5		0.68435
2484		0.68496
2485.4		0.69869
2486.8		0.68468
2488.2		0.67873
2489.6		0.68166
2491.1		0.68503
2492.5		0.68217
2493.9		0.68527
2495.3		0.67442
2496.8		0.6698
2498.2		0.66294
2499.6		0.68331
2501		0.67816
2502.5		0.66296
2503.9		0.68053
2505.3		0.6703
2506.7		0.68493
2508.2		0.66897
2509.6		0.67057
2511		0.67451
2512.4		0.68093
2513.9		0.65706
2515.3		0.67889
2516.7		0.69784
2518.1		0.6732
2519.6		0.67539
2521		0.69323
2522.4		0.70509
2523.8		0.68879
2525.3		0.69452
2526.7		0.69076
2528.1		0.6694
2529.5		0.68926
2531		0.67881
2532.4		0.68555
2533.8		0.68509
2535.2		0.69353
2536.7		0.69399
2538.1		0.67521
2539.5		0.66768
2540.9		0.69277
2542.3		0.69678
2543.8		0.70089
2545.2		0.68478
2546.6		0.68853
2548		0.69561
2549.5		0.66808
2550.9		0.69401
2552.3		0.67859
2553.7		0.70429
2555.2		0.65726
2556.6		0.66492
2558		0.68455
2559.4		0.695
2560.9		0.67631
2562.3		0.70063
2563.7		0.68235
2565.1		0.69147
2566.6		0.68641
2568		0.66728
2569.4		0.69437
2570.8		0.68159
2572.3		0.67128
2573.7		0.66545
2575.1		0.68701
2576.5		0.68792
2578		0.68153
2579.4		0.67565
2580.8		0.6821
2582.2		0.68638
2583.7		0.70387
2585.1		0.68841
2586.5		0.70021
2587.9		0.70269
2589.3		0.67093
2590.8		0.65736
2592.2		0.6784
2593.6		0.68428
2595		0.67297
2596.5		0.68041
2597.9		0.68032
2599.3		0.6748
2600.7		0.69628
2602.2		0.67602
2603.6		0.68208
2605		0.66255
2606.4		0.6856
2607.9		0.67697
2609.3		0.68188
2610.7		0.68
2612.1		0.65793
2613.6		0.66398
2615		0.67231
2616.4		0.68351
2617.8		0.66049
2619.3		0.67661
2620.7		0.68679
2622.1		0.6946
2623.5		0.69178
2625		0.68882
2626.4		0.66696
2627.8		0.67642
2629.2		0.69583
2630.7		0.6887
2632.1		0.70533
2633.5		0.6881
2634.9		0.67674
2636.4		0.66916
2637.8		0.68127
2639.2		0.68266
2640.6		0.6979
2642		0.69525
2643.5		0.67908
2644.9		0.67075
2646.3		0.6774
2647.7		0.67879
2649.2		0.67429
2650.6		0.67551
2652		0.69821
2653.4		0.68735
2654.9		0.66955
2656.3		0.69903
2657.7		0.66795
2659.1		0.68062
2660.6		0.69038
2662		0.68993
2663.4		0.67797
2664.8		0.71564
2666.3		0.6837
2667.7		0.67994
2669.1		0.68143
2670.5		0.67559
2672		0.68126
2673.4		0.6675
2674.8		0.68553
2676.2		0.67971
2677.7		0.70231
2679.1		0.67054
2680.5		0.69617
2681.9		0.7087
2683.4		0.67412
2684.8		0.68923
2686.2		0.69143
2687.6		0.68951
2689		0.66812
2690.5		0.65945
2691.9		0.68632
2693.3		0.69003
2694.7		0.6902
2696.2		0.68256
2697.6		0.68615
2699		0.67655
2700.4		0.69752
2701.9		0.66854
2703.3		0.68451
2704.7		0.69436
2706.1		0.68597
2707.6		0.68434
2709		0.67312
2710.4		0.69866
2711.8		0.67
2713.3		0.69235
2714.7		0.67617
2716.1		0.67312
2717.5		0.68805
2719		0.67961
2720.4		0.66534
2721.8		0.68589
2723.2		0.69016
2724.7		0.6687
2726.1		0.68299
2727.5		0.68143
2728.9		0.70135
2730.4		0.70029
2731.8		0.69959
2733.2		0.68753
2734.6		0.68783
2736.1		0.67857
2737.5		0.71797
2738.9		0.69514
2740.3		0.70044
2741.7		0.69209
2743.2		0.69702
2744.6		0.70917
2746		0.68105
2747.4		0.68616
2748.9		0.68594
2750.3		0.68307
2751.7		0.7016
2753.1		0.69074
2754.6		0.67723
2756		0.6924
2757.4		0.70268
2758.8		0.67229
2760.3		0.69316
2761.7		0.69792
2763.1		0.69368
2764.5		0.67896
2766		0.68417
2767.4		0.68785
2768.8		0.67119
2770.2		0.69175
2771.7		0.69126
2773.1		0.70772
2774.5		0.69499
2775.9		0.68703
2777.4		0.69277
2778.8		0.70676
2780.2		0.68468
2781.6		0.69374
2783.1		0.70197
2784.5		0.68529
2785.9		0.68676
2787.3		0.69805
2788.7		0.69721
2790.2		0.69663
2791.6		0.70513
2793		0.69549
2794.4		0.68227
2795.9		0.67709
2797.3		0.71782
2798.7		0.66813
2800.1		0.67581
2801.6		0.70108
2803		0.71213
2804.4		0.71111
2805.8		0.68749
2807.3		0.71143
2808.7		0.68038
2810.1		0.68823
2811.5		0.69314
2813		0.68534
2814.4		0.69758
2815.8		0.68634
2817.2		0.67868
2818.7		0.68378
2820.1		0.67775
2821.5		0.70004
2822.9		0.6929
2824.4		0.68753
2825.8		0.68169
2827.2		0.69648
2828.6		0.6942
2830.1		0.71522
2831.5		0.69625
2832.9		0.70689
[truncated: 2,955 more rows]

## Sheet: F5-FS1-E-F
	Quinacrine in HeLa Cytoplasm			Quinacrine in HeLa Cytoplasm
Fluorescent signal (Conc.)	Average Rates k (s-1)		Fluorescent signal (Conc.)	% of Recovery
1277.4	3.0728		1277.4	81.959
2673.2	2.0876		2673.2	73.466
2209.5	2.0622		2209.5	76
2260.6	1.762		2260.6	80.418
3417.8	1.9394		3417.8	72.695
3203.7	2.2168		3203.7	69.419
1824.1	1.829		1824.1	86.28
1375.6	2.7349		1375.6	83.315
2417.4	2.3558		2417.4	72.105
1923.5	1.8906		1923.5	69.741
948.02	1.7988		948.02	84.155
2705.2	3.6462		2705.2	60.769
2651.8	2.6328		2651.8	68.858
2425.7	2.3325		2425.7	69.64
2108.5	3.1983		2108.5	87.063
1807.8	2.2904		1807.8	77.272
1648.7	1.9203		1648.7	85.829
1295.8	2.2925		1295.8	88.469
2378.5	2.238		2378.5	67.854
1879.4	1.8401		1879.4	71.363
3432.5	1.4561		3432.5	68.786
1433.2	2.1219		1433.2	90.94
2299.9	2.1208		2299.9	79.877
1716.8	1.4745		1716.8	89.202
1554.7	2.4622		1554.7	69.457
1184.2	1.7707		1184.2	93.407
1757.1	1.6488		1757.1	75.85
936.38	2.0338		936.38	95.255
