# Supplementary material for: Reversing protonation of weakly basic drugs greatly enhances intracellular diffusion and decreases lysosomal sequestration
Source: eLife. 2024 Dec 6;13:RP97255. doi: 10.7554/eLife.97255 (PMC11623935; doi:10.7554/eLife.97255)
Supplement: Figure 5—figure supplement 3—source data 1. [file elife-97255-fig5-figsupp3-data1.xlsx]

## Sheet: F5-FS3-A
Time axis (re-adjusted)	Pre-Bleach	2 micro Molar (2 hours)	6 micro Molar (2 hours)	2 micro Molar (24 hours)	6 micro Molar (24 hours)
-12.819	1								Quinacine in HeLa
-11.394	0.99512								FRAP: Dose & time dependecy
-9.97	0.99483
-8.5457	0.99183
-7.1214	0.99696
-5.6971	0.98882
-4.2729	0.9755
-2.8486	0.9829
-1.4243	0.99759
0		0.19052	0.14532	0.076703	0.080841
1.4243		0.19684	0.15642	0.08087	0.086525
2.8486		0.20909	0.16135	0.07967	0.08805
4.2729		0.21034	0.17168	0.088118	0.092015
5.6971		0.21851	0.17479	0.092434	0.097968
7.1214		0.23093	0.17948	0.093296	0.10311
8.5457		0.22114	0.18711	0.092446	0.10316
9.97		0.22922	0.19641	0.097112	0.10481
11.394		0.23257	0.19044	0.10348	0.10994
12.819		0.24482	0.19808	0.10209	0.11126
14.243		0.24646	0.19927	0.10592	0.11466
15.667		0.2454	0.20471	0.10701	0.11127
17.091		0.24256	0.20758	0.10759	0.11119
18.516		0.2436	0.19609	0.11089	0.11184
19.94		0.2608	0.20613	0.10517	0.12132
21.364		0.24996	0.21223	0.1078	0.11779
22.789		0.25539	0.21395	0.11157	0.11882
24.213		0.2536	0.21126	0.11199	0.12021
25.637		0.24507	0.22369	0.11598	0.12167
27.061		0.26149	0.22707	0.11718	0.12525
28.486		0.26136	0.22539	0.11825	0.12295
29.91		0.26622	0.21426	0.11636	0.12828
31.334		0.26553	0.23278	0.11677	0.12587
32.759		0.26492	0.22924	0.11921	0.13195
34.183		0.27719	0.22697	0.11799	0.12271
35.607		0.2707	0.22382	0.12423	0.1237
37.031		0.2638	0.23454	0.11183	0.12152
38.456		0.27722	0.23746	0.12808	0.13357
39.88		0.27233	0.23132	0.11856	0.12984
41.304		0.27596	0.23277	0.12346	0.11998
42.729		0.27774	0.2467	0.12742	0.1249
44.153		0.27071	0.23975	0.12322	0.12659
45.577		0.27734	0.2381	0.12158	0.13209
47.001		0.28268	0.23922	0.12237	0.13032
48.426		0.27602	0.25636	0.12964	0.13404
49.85		0.27464	0.24467	0.12326	0.12976
51.274		0.28349	0.24897	0.12789	0.12982
52.699		0.27892	0.25387	0.12121	0.13312
54.123		0.28247	0.25575	0.12915	0.1346
55.547		0.28614	0.24373	0.12547	0.13234
56.971		0.28671	0.25199	0.13037	0.12983
58.396		0.29372	0.26367	0.12443	0.14059
59.82		0.29533	0.25603	0.12618	0.13918
61.244		0.28715	0.26463	0.12886	0.13002
62.669		0.27931	0.27049	0.12725	0.13751
64.093		0.29709	0.26272	0.12551	0.13472
65.517		0.30391	0.25816	0.13311	0.13968
66.941		0.30207	0.2653	0.1256	0.14077
68.366		0.30493	0.26572	0.13606	0.13693
69.79		0.3031	0.26921	0.12304	0.13663
71.214		0.28423	0.26626	0.12888	0.13968
72.639		0.28277	0.27255	0.12576	0.13903
74.063		0.30216	0.27669	0.13537	0.14314
75.487		0.30336	0.26643	0.13791	0.13665
76.911		0.30232	0.26765	0.13855	0.13519
78.336		0.29054	0.2762	0.13262	0.13805
79.76		0.30189	0.27856	0.13652	0.14142
81.184		0.28814	0.27386	0.13323	0.14242
82.609		0.30299	0.2887	0.13602	0.13827
84.033		0.2942	0.2806	0.13488	0.14064
85.457		0.29658	0.27806	0.13841	0.13835
86.881		0.29229	0.29066	0.13572	0.14175
88.306		0.31699	0.28782	0.13702	0.14
89.73		0.30697	0.27976	0.13579	0.14169
91.154		0.30754	0.28815	0.13156	0.13185
92.579		0.29417	0.28153	0.13574	0.13735
94.003		0.3003	0.29511	0.13819	0.1411
95.427		0.30226	0.28544	0.13181	0.13781
96.851		0.30743	0.29261	0.13156	0.14254
98.276		0.30882	0.29441	0.12848	0.14157
99.7		0.30635	0.28281	0.13553	0.13898
101.12		0.31018	0.29564	0.13987	0.13487
102.55		0.30753	0.297	0.13727	0.14702
103.97		0.31346	0.28588	0.13542	0.13819
105.4		0.3111	0.3003	0.13911	0.13983
106.82		0.30433	0.29608	0.13594	0.13788
108.25		0.32058	0.30063	0.13555	0.14477
109.67		0.32065	0.29853	0.13672	0.14531
111.09		0.31199	0.31639	0.13613	0.1394
112.52		0.31351	0.29955	0.13835	0.14512
113.94		0.30502	0.30227	0.12995	0.14419
115.37		0.31605	0.29733	0.13831	0.14268
116.79		0.30656	0.2941	0.13786	0.14454
118.22		0.31044	0.30285	0.1415	0.14682
119.64		0.31891	0.31608	0.13548	0.1399
121.06		0.31279	0.31683	0.14066	0.15073
122.49		0.30946	0.31345	0.1399	0.14561
123.91		0.31968	0.31608	0.13707	0.14831
125.34		0.31925	0.31174	0.14273	0.14594
126.76		0.31039	0.30865	0.13771	0.15223
128.19		0.3241	0.323	0.13703	0.14145
129.61		0.32759	0.31987	0.14309	0.15025
131.03		0.33061	0.31624	0.1382	0.14279
132.46		0.32831	0.30449	0.1416	0.15198
133.88		0.31642	0.31504	0.14136	0.14936
135.31		0.31843	0.31633	0.13514	0.15232
136.73		0.31892	0.32135	0.13961	0.14734
138.16		0.32306	0.32071	0.14074	0.15438
139.58		0.33089	0.32592	0.1431	0.15341
141		0.32143	0.31444	0.14271	0.15075
142.43		0.32221	0.31357	0.14024	0.14528
143.85		0.31879	0.32455	0.14641	0.13874
145.28		0.32506	0.32479	0.13991	0.14402
146.7		0.33908	0.33257	0.14037	0.14867
148.13		0.32159	0.32566	0.14727	0.14425
149.55		0.32575	0.32596	0.13918	0.14576
150.97		0.33322	0.31213	0.13609	0.1543
152.4		0.3331	0.34022	0.14601	0.15086
153.82		0.31781	0.32672	0.13446	0.15302
155.25		0.33015	0.33323	0.13211	0.15905
156.67		0.3273	0.3267	0.14448	0.15527
158.1		0.32544	0.33584	0.15112	0.14861
159.52		0.33192	0.33556	0.14099	0.14647
160.94		0.3298	0.32757	0.1444	0.15549
162.37		0.33301	0.32961	0.13972	0.15053
163.79		0.34052	0.33096	0.15145	0.15095
165.22		0.32967	0.33673	0.14088	0.14565
166.64		0.33425	0.33028	0.1483	0.15437
168.07		0.33827	0.32975	0.14393	0.14629
169.49		0.33256	0.33103	0.15417	0.14927
170.91		0.32833	0.34648	0.14332	0.15242
172.34		0.33485	0.33618	0.145	0.15023
173.76		0.33694	0.33721	0.14967	0.15235
175.19		0.34111	0.34084	0.14464	0.15024
176.61		0.33645	0.33548	0.14492	0.15349
178.04		0.33428	0.34467	0.15184	0.15104
179.46		0.33681	0.33856	0.1565	0.15625
180.88		0.33099	0.34012	0.15141	0.15728
182.31		0.35668	0.35383	0.14001	0.1572
183.73		0.33144	0.33818	0.14523	0.14993
185.16		0.34196	0.35093	0.14438	0.15425
186.58		0.33592	0.34373	0.14382	0.15555
188.01		0.34383	0.34031	0.14748	0.15184
189.43		0.35007	0.3522	0.15463	0.15392
190.85		0.34151	0.34869	0.14575	0.15138
192.28		0.33554	0.35364	0.15152	0.15728
193.7		0.34139	0.35306	0.14815	0.15278
195.13		0.33464	0.36495	0.15008	0.16003
196.55		0.33853	0.35066	0.14658	0.14758
197.98		0.34484	0.35276	0.15133	0.14872
199.4		0.34528	0.36237	0.14687	0.15754
200.82		0.34311	0.35536	0.15252	0.15675
202.25		0.34009	0.36281	0.14389	0.16034
203.67		0.34365	0.35915	0.13932	0.16116
205.1		0.34532	0.3536	0.1443	0.15315
206.52		0.34382	0.35324	0.14967	0.14836
207.95		0.36261	0.37359	0.1566	0.15634
209.37		0.34088	0.36495	0.1469	0.15449
210.79		0.35543	0.37136	0.14882	0.1552
212.22		0.34665	0.35589	0.14978	0.15838
213.64		0.34824	0.35823	0.15048	0.1595
215.07		0.34656	0.34886	0.14248	0.15677
216.49		0.33918	0.36345	0.15349	0.15065
217.92		0.35374	0.36268	0.14406	0.15216
219.34		0.35307	0.37553	0.15603	0.15783
220.76		0.34912	0.35633	0.15625	0.15385
222.19		0.35462	0.36776	0.14312	0.15527
223.61		0.35144	0.35636	0.14722	0.15275
225.04		0.34886	0.35824	0.14885	0.16376
226.46		0.34736	0.36309	0.15282	0.15987
227.89		0.35213	0.35569	0.14676	0.16312
229.31		0.35029	0.37381	0.15048	0.15908
230.73		0.3453	0.35629	0.15386	0.1573
232.16		0.3467	0.36487	0.14729	0.16817
233.58		0.35517	0.367	0.15134	0.16086
235.01		0.3407	0.38092	0.14941	0.15878
236.43		0.35624	0.35055	0.14234	0.1556
237.86		0.34865	0.3647	0.15182	0.1653
239.28		0.35331	0.36065	0.15227	0.15021
240.7		0.35491	0.3574	0.15557	0.15247
242.13		0.34936	0.36392	0.15219	0.15927
243.55		0.34789	0.37379	0.1503	0.15199
244.98		0.35521	0.36937	0.14744	0.1641
246.4		0.35576	0.3677	0.15445	0.15479
247.83		0.36548	0.37557	0.15506	0.16276
249.25		0.36187	0.36367	0.161	0.15553
250.67		0.36641	0.37401	0.15049	0.16235
252.1		0.36376	0.36143	0.15172	0.15956
253.52		0.35896	0.37689	0.15412	0.16187
254.95		0.35215	0.37105	0.14922	0.15731
256.37		0.36146	0.37558	0.15122	0.16942
257.8		0.35373	0.3692	0.15082	0.1659
259.22		0.34975	0.38883	0.14943	0.16637
260.64		0.36509	0.37473	0.15352	0.16208
262.07		0.36463	0.38207	0.15301	0.15374
263.49		0.35471	0.39218	0.15418	0.16182
264.92		0.36384	0.38457	0.15421	0.15359
266.34		0.36023	0.38699	0.15008	0.16795
267.77		0.36374	0.38493	0.1532	0.16644
269.19		0.36291	0.3676	0.1564	0.16121
270.61		0.35888	0.37884	0.157	0.16941
272.04		0.35459	0.37885	0.15711	0.16492
273.46		0.35134	0.37441	0.1569	0.16272
274.89		0.3697	0.38285	0.14836	0.16402
276.31		0.36114	0.39041	0.15448	0.16714
277.74		0.37359	0.38941	0.1547	0.15785
279.16		0.359	0.37631	0.15936	0.16323
280.58		0.35857	0.37105	0.16039	0.15503
282.01		0.36122	0.39296	0.14661	0.15558
283.43		0.36151	0.38555	0.15956	0.16531
284.86		0.36381	0.3893	0.15121	0.16034
286.28		0.35896	0.38834	0.15286	0.16657
287.71		0.37684	0.37911	0.15382	0.16262
289.13		0.37349	0.39374	0.15814	0.16425
290.55		0.3613	0.40242	0.15862	0.16561
291.98		0.35982	0.39374	0.15874	0.1648
293.4		0.35522	0.38324	0.15301	0.16512
294.83		0.36463	0.39106	0.14388	0.15736
296.25		0.37682	0.39313	0.15747	0.15754
297.68		0.3617	0.38965	0.15576	0.16997
299.1		0.36762	0.40113	0.16009	0.16576
300.52		0.37028	0.39305	0.156	0.16336
301.95		0.36792	0.39547	0.15441	0.16359
303.37		0.35323	0.40128	0.15992	0.16281
304.8		0.35467	0.38284	0.15361	0.16682
306.22		0.36462	0.37819	0.15072	0.16808
307.65		0.37542	0.39969	0.15517	0.16212
309.07		0.38152	0.38759	0.15545	0.16279
310.49		0.3741	0.39475	0.16102	0.15943
311.92		0.37227	0.41175	0.15007	0.16644
313.34		0.37198	0.38735	0.15328	0.1692
314.77		0.35269	0.3999	0.15298	0.16646
316.19		0.36669	0.37495	0.16367	0.16048
317.62		0.36715	0.40134	0.16261	0.16555
319.04		0.37508	0.40098	0.15317	0.16278
320.46		0.35743	0.39587	0.16053	0.16809
321.89		0.37756	0.39766	0.16778	0.17104
323.31		0.3767	0.39684	0.16232	0.16094
324.74		0.37065	0.38713	0.16237	0.16563
326.16		0.37483	0.38489	0.15341	0.16315
327.59		0.36085	0.40162	0.16127	0.1627
329.01		0.38216	0.39941	0.15758	0.16913
330.43		0.36969	0.40366	0.15679	0.16599
331.86		0.36035	0.40466	0.15632	0.17297
333.28		0.36801	0.39584	0.16696	0.16411
334.71		0.37118	0.40877	0.1564	0.1624
336.13		0.38109	0.40766	0.15258	0.16302
337.56		0.35923	0.40905	0.16157	0.175
338.98		0.37215	0.40389	0.15329	0.1631
340.4		0.37849	0.39351	0.15519	0.17761
341.83		0.37723	0.3881	0.15736	0.168
343.25		0.38809	0.40041	0.15599	0.16515
344.68		0.3724	0.40345	0.1641	0.16545
346.1		0.3686	0.40635	0.15766	0.17059
347.53		0.37699	0.4128	0.15919	0.1691
348.95		0.36359	0.41639	0.16005	0.16936
350.37		0.37174	0.41395	0.15696	0.15895
351.8		0.37168	0.40124	0.15711	0.16243
353.22		0.38165	0.40159	0.15206	0.16805
354.65		0.37101	0.40867	0.15921	0.17238
356.07		0.36529	0.39704	0.15737	0.16784
357.5		0.383	0.41886	0.15394	0.17179
358.92		0.36892	0.40351	0.16213	0.17283
360.34		0.39577	0.41085	0.16323	0.17351
361.77		0.38732	0.41807	0.16489	0.16686
363.19		0.37513	0.40259	0.15557	0.16589
364.62		0.37758	0.41661	0.16359	0.16616
366.04		0.38296	0.40815	0.15823	0.16978
367.47		0.37987	0.3971	0.15445	0.16841
368.89		0.37978	0.41773	0.16142	0.16711
370.31		0.38347	0.3988	0.15543	0.16628
371.74		0.37941	0.39828	0.16413	0.16925
373.16		0.37492	0.40943	0.16141	0.16576
374.59		0.38459	0.40544	0.15828	0.17457
376.01		0.38356	0.43092	0.15436	0.17304
377.44		0.37305	0.41792	0.15229	0.17462
378.86		0.37042	0.41016	0.15592	0.16392
380.28		0.39895	0.41463	0.15845	0.17526
381.71		0.3819	0.41428	0.15305	0.179
383.13		0.38198	0.40948	0.16246	0.16979
384.56		0.38036	0.41424	0.15484	0.17149
385.98		0.39294	0.42613	0.16414	0.17119
387.41		0.3827	0.40993	0.16062	0.16624
388.83		0.39222	0.40025	0.15536	0.16839
390.25		0.37697	0.42863	0.16306	0.16969
391.68		0.37091	0.41503	0.15084	0.17613
393.1		0.38087	0.41544	0.16043	0.17497
394.53		0.38092	0.40299	0.16752	0.16589
395.95		0.38711	0.40467	0.15895	0.17623
397.38		0.38657	0.41414	0.15877	0.16592
398.8		0.37234	0.41728	0.16199	0.16945
400.22		0.39977	0.42075	0.14999	0.16644
401.65		0.37685	0.41635	0.16305	0.17404
403.07		0.37466	0.42506	0.16377	0.16984
404.5		0.38518	0.41941	0.15473	0.16714
405.92		0.38521	0.42084	0.16029	0.17891
407.35		0.38081	0.423	0.15768	0.16685
408.77		0.38938	0.42071	0.1585	0.1644
410.19		0.38469	0.4121	0.16257	0.16393
411.62		0.39274	0.42431	0.16113	0.16912
413.04		0.3807	0.43307	0.16045	0.17428
414.47		0.3878	0.42556	0.15855	0.16618
415.89		0.3728	0.40172	0.15965	0.17428
417.32		0.38122	0.42159	0.16711	0.175
418.74		0.39424	0.4262	0.16221	0.1745
420.16		0.38276	0.42427	0.16204	0.18272
421.59		0.38568	0.4156	0.16136	0.16768
423.01		0.37386	0.42491	0.16112	0.1746
424.44		0.39589	0.42272	0.16399	0.17545
425.86		0.39238	0.4265	0.15377	0.17024
427.29		0.3919	0.42489	0.15571	0.18159
428.71		0.39669	0.42086	0.16363	0.17073
430.13		0.37417	0.42745	0.15817	0.16693
431.56		0.38813	0.4294	0.16661	0.1734
432.98		0.39198	0.42173	0.1597	0.17126
434.41		0.38058	0.42187	0.16812	0.16977
435.83		0.39375	0.40935	0.16207	0.18013
437.26		0.3832	0.42971	0.16311	0.17427
438.68		0.39693	0.4314	0.15664	0.17518
440.1		0.38968	0.44049	0.16066	0.16173
441.53		0.40083	0.43225	0.16695	0.17516
442.95		0.3923	0.4195	0.1649	0.17704
444.38		0.40045	0.42115	0.16697	0.17973
445.8		0.40048	0.43788	0.16582	0.17216
447.23		0.39166	0.434	0.16622	0.17333
448.65		0.387	0.43282	0.15454	0.17298
450.07		0.39117	0.42773	0.1615	0.17777
451.5		0.39193	0.43558	0.15966	0.17614
452.92		0.39267	0.43651	0.16557	0.17467
454.35		0.39388	0.4323	0.16582	0.16513
455.77		0.39256	0.42578	0.17142	0.16825
457.2		0.40079	0.41132	0.16777	0.17006
458.62		0.38653	0.43531	0.15942	0.1703
460.04		0.40707	0.43291	0.16218	0.18129
461.47		0.40296	0.41897	0.16858	0.1761
462.89		0.39486	0.4306	0.16212	0.17469
464.32		0.39284	0.4373	0.16839	0.17156
465.74		0.38689	0.43107	0.16305	0.1663
467.17		0.38775	0.42328	0.17047	0.16641
468.59		0.38942	0.4264	0.16193	0.17777
470.01		0.39304	0.43421	0.16179	0.17022
471.44		0.40144	0.42981	0.16669	0.1805
472.86		0.40073	0.43572	0.16452	0.16821
474.29		0.38583	0.43022	0.16067	0.18209
475.71		0.39793	0.44156	0.16725	0.17255
477.14		0.3914	0.43021	0.16791	0.17961
478.56		0.39396	0.4284	0.17155	0.16729
479.98		0.3926	0.42822	0.16828	0.17711
481.41		0.3917	0.43022	0.16412	0.18092
482.83		0.38731	0.43587	0.15969	0.17921
484.26		0.39702	0.42244	0.16565	0.1747
485.68		0.39794	0.44061	0.16955	0.17248
487.11		0.40123	0.43189	0.16206	0.17156
488.53		0.39886	0.43722	0.15433	0.17819
489.95		0.3924	0.42876	0.16729	0.17491
491.38		0.40187	0.43326	0.15809	0.17893
492.8		0.39262	0.43129	0.16182	0.17174
494.23		0.40396	0.4399	0.15599	0.18124
495.65		0.39866	0.4388	0.16531	0.16586
497.08		0.39062	0.43839	0.16056	0.17918
498.5		0.4059	0.43642	0.16082	0.17738
499.92		0.38391	0.44585	0.1647	0.17806
501.35		0.39188	0.42911	0.16754	0.17644
502.77		0.37917	0.44668	0.16008	0.1784
504.2		0.40675	0.44261	0.17466	0.1859
505.62		0.40297	0.4404	0.16294	0.17228
507.05		0.38681	0.43953	0.16029	0.17855
508.47		0.39355	0.43701	0.16705	0.17774
509.89		0.41253	0.44619	0.16163	0.16926
511.32		0.39674	0.43517	0.16676	0.17452
512.74		0.39086	0.44716	0.16611	0.17291
514.17		0.38959	0.44919	0.1765	0.19081
515.59		0.40002	0.43143	0.16439	0.17394
517.02		0.40694	0.42982	0.16878	0.17887
518.44		0.40196	0.45024	0.16514	0.17644
519.86		0.41615	0.44246	0.15957	0.17889
521.29		0.41233	0.45403	0.15978	0.17548
522.71		0.40433	0.44153	0.15637	0.17821
524.14		0.40947	0.44909	0.16649	0.17622
525.56		0.39587	0.4472	0.15887	0.18273
526.99		0.40384	0.44567	0.16926	0.17067
528.41		0.39042	0.43193	0.15919	0.16879
529.83		0.40297	0.45786	0.17014	0.17682
531.26		0.40173	0.44683	0.16222	0.1827
532.68		0.39118	0.44474	0.16926	0.17903
534.11		0.39299	0.4537	0.17249	0.17135
535.53		0.39828	0.44871	0.16244	0.17904
536.96		0.39792	0.44929	0.16352	0.17919
538.38		0.39915	0.44028	0.16941	0.17569
539.8		0.39049	0.44244	0.16079	0.18417
541.23		0.38891	0.46097	0.16633	0.16965
542.65		0.39235	0.4535	0.16778	0.17744
544.08		0.40887	0.45276	0.16143	0.18498
545.5		0.42151	0.45535	0.16591	0.18132
546.93		0.41164	0.45288	0.1671	0.17527
548.35		0.39484	0.44387	0.1631	0.17341
549.77		0.40526	0.45278	0.1599	0.18162
551.2		0.40624	0.4441	0.16569	0.16984
552.62		0.40849	0.45053	0.1606	0.18177
554.05		0.4052	0.45158	0.16877	0.17554
555.47		0.40386	0.45422	0.16982	0.17788
556.9		0.40776	0.4499	0.16226	0.18015
558.32		0.40858	0.44625	0.16275	0.17682
559.74		0.39687	0.46267	0.16658	0.18264
561.17		0.40362	0.43406	0.16013	0.17766
562.59		0.39442	0.44511	0.175	0.17106
564.02		0.40029	0.44138	0.16918	0.18087
565.44		0.41538	0.45774	0.16887	0.17526
566.87		0.41604	0.43935	0.17355	0.17916
568.29		0.40334	0.44814	0.17154	0.17953
569.71		0.41291	0.45377	0.16445	0.17852
571.14		0.40539	0.44757	0.16568	0.18145
572.56		0.41281	0.43718	0.15648	0.18541
573.99		0.39734	0.44772	0.16696	0.17998
575.41		0.40902	0.4468	0.16725	0.18279
576.84		0.41184	0.46033	0.17319	0.178
578.26		0.40547	0.46015	0.15663	0.19271
579.68		0.40583	0.43658	0.16268	0.18039
581.11		0.40239	0.45456	0.17059	0.17496
582.53		0.41163	0.46997	0.17406	0.17845
583.96		0.41362	0.45075	0.17379	0.1815
585.38		0.40858	0.46208	0.17891	0.17716
586.81		0.40675	0.44564	0.17192	0.17861
588.23		0.4111	0.45572	0.17203	0.17578
589.65		0.39572	0.45098	0.16804	0.1747
591.08		0.41392	0.4588	0.16018	0.17552
592.5		0.39507	0.45456	0.16499	0.18248
593.93		0.41409	0.45373	0.16869	0.17896
595.35		0.41485	0.44978	0.167	0.1775
596.78		0.40171	0.45705	0.16695	0.18688
598.2		0.41244	0.43561	0.17158	0.17727
599.62		0.40653	0.44677	0.15409	0.18338
601.05		0.40804	0.44583	0.16834	0.17876
602.47		0.42105	0.4496	0.17043	0.18494
603.9		0.39832	0.44165	0.16862	0.17189
605.32		0.41254	0.46011	0.16533	0.18239
606.75		0.41341	0.44582	0.17037	0.18044
608.17		0.4154	0.45687	0.17052	0.18385
609.59		0.40501	0.45311	0.16901	0.18653
611.02		0.41784	0.45524	0.17794	0.17475
612.44		0.40407	0.4658	0.1655	0.18188
613.87		0.4047	0.4534	0.16535	0.17839
615.29		0.40106	0.45209	0.16942	0.18963
616.72		0.40861	0.45548	0.16336	0.18419
618.14		0.40161	0.45212	0.16993	0.17887
619.56		0.39892	0.44693	0.16765	0.19171
620.99		0.40891	0.45488	0.16617	0.18296
622.41		0.41607	0.46182	0.17063	0.17818
623.84		0.4139	0.4573	0.17279	0.17876
625.26		0.41499	0.44673	0.17002	0.178
626.69		0.41893	0.47328	0.17145	0.18034
628.11		0.40419	0.46397	0.16643	0.18304
629.53		0.40121	0.46573	0.1765	0.184
630.96		0.41663	0.46688	0.17002	0.18442
632.38		0.40976	0.46608	0.17232	0.17874
633.81		0.41619	0.45795	0.17172	0.17794
635.23		0.40238	0.46468	0.16267	0.18789
636.66		0.42512	0.4518	0.16722	0.18858
638.08		0.40337	0.46348	0.17425	0.19011
639.5		0.40412	0.44759	0.17075	0.18099
640.93		0.41554	0.44713	0.17013	0.18198
642.35		0.41906	0.46726	0.17109	0.1804
643.78		0.41474	0.45938	0.16376	0.18536
645.2		0.40572	0.45831	0.16608	0.17761
646.63		0.41518	0.46077	0.16639	0.1852
648.05		0.41506	0.44848	0.17528	0.18539
649.47		0.40101	0.45959	0.17026	0.17673
650.9		0.41016	0.44887	0.16677	0.18519
652.32		0.39948	0.45282	0.1761	0.18769
653.75		0.4105	0.47167	0.16724	0.19173
655.17		0.41213	0.4598	0.16359	0.17551
656.6		0.41733	0.4739	0.17903	0.19356
658.02		0.40362	0.46657	0.17332	0.18487
659.44		0.40051	0.46518	0.1714	0.17458
660.87		0.40249	0.4651	0.17058	0.18365
662.29		0.40546	0.46796	0.16772	0.18031
663.72		0.41463	0.46527	0.17364	0.17826
665.14		0.41467	0.46101	0.16418	0.18255
666.57		0.41886	0.47568	0.17473	0.19207
667.99		0.40923	0.45349	0.17123	0.18574
669.41		0.42065	0.46893	0.17256	0.18053
670.84		0.42328	0.45886	0.17476	0.18134
672.26		0.42213	0.46435	0.17108	0.18188
673.69		0.41536	0.4822	0.16973	0.18698
675.11		0.40536	0.47629	0.16628	0.18378
676.54		0.41298	0.45744	0.17958	0.18511
677.96		0.4106	0.45653	0.16779	0.19156
679.38		0.4118	0.45971	0.17364	0.18344
680.81		0.40931	0.46355	0.17021	0.18511
682.23		0.42864	0.46838	0.17225	0.18626
683.66		0.40871	0.47524	0.17055	0.17449
685.08		0.43255	0.46244	0.17285	0.18297
686.51		0.41394	0.46266	0.17326	0.18327
687.93		0.41596	0.48668	0.16969	0.17955
689.35		0.41728	0.46896	0.18025	0.18975
690.78		0.42012	0.45015	0.16775	0.18352
692.2		0.41943	0.45353	0.17529	0.17812
693.63		0.4171	0.45995	0.18181	0.18323
695.05		0.41733	0.45764	0.1759	0.18741
696.48		0.41114	0.47345	0.17329	0.18567
697.9		0.42215	0.4763	0.17015	0.19173
699.32		0.41168	0.4469	0.17289	0.18407
700.75		0.41745	0.47266	0.17687	0.18491
702.17		0.41282	0.46116	0.16705	0.18353
703.6		0.43125	0.47215	0.16806	0.1852
705.02		0.41947	0.48584	0.16561	0.18373
706.45		0.43267	0.46943	0.17582	0.18465
707.87		0.42265	0.46806	0.17685	0.1749
709.29		0.42751	0.46848	0.17912	0.19458
710.72		0.43258	0.45987	0.16584	0.18652
712.14		0.42804	0.4714	0.17914	0.18011
713.57		0.41335	0.48388	0.1777	0.18229
714.99		0.40443	0.47264	0.17262	0.18154
716.42		0.41547	0.47274	0.16816	0.18413
717.84		0.42429	0.48752	0.18138	0.19488
719.26		0.42692	0.47287	0.17352	0.18326
720.69		0.43499	0.49019	0.16612	0.18439
722.11		0.40822	0.47362	0.1701	0.18565
723.54		0.4179	0.47532	0.1815	0.17994
724.96		0.41901	0.48173	0.18175	0.18443
726.39		0.42263	0.46404	0.17069	0.19031
727.81		0.42148	0.47952	0.17006	0.186
729.23		0.41478	0.46729	0.16415	0.17944
730.66		0.4242	0.46699	0.16902	0.17837
732.08		0.42873	0.49072	0.1811	0.195
733.51		0.42082	0.47254	0.16823	0.18186
734.93		0.42622	0.4719	0.16666	0.1844
736.36		0.42968	0.49313	0.17423	0.18429
737.78		0.42167	0.46833	0.17543	0.19162
739.2		0.42065	0.46336	0.17894	0.19271
740.63		0.42114	0.47353	0.17719	0.19152
742.05		0.43431	0.45172	0.17534	0.184
743.48		0.42023	0.47547	0.1752	0.1827
744.9		0.40342	0.47245	0.1706	0.17876
746.33		0.42902	0.46618	0.17529	0.18548
747.75		0.41831	0.48183	0.16384	0.18357
749.17		0.42163	0.46635	0.16743	0.17793
750.6		0.4146	0.48243	0.16965	0.18289
752.02		0.43506	0.48902	0.17268	0.18379
753.45		0.42742	0.48145	0.17562	0.18112
754.87		0.43027	0.48286	0.17758	0.1892
756.3		0.42282	0.47965	0.17821	0.18569
757.72		0.41505	0.4694	0.17096	0.18319
759.14		0.41565	0.49307	0.16795	0.1864
760.57		0.41028	0.47731	0.17887	0.18964
761.99		0.4203	0.48999	0.16855	0.18988
763.42		0.4298	0.46782	0.16423	0.19498
764.84		0.42547	0.46928	0.17002	0.19065
766.27		0.41724	0.48226	0.17335	0.1862
767.69		0.41301	0.48624	0.17113	0.18764
769.11		0.42908	0.46171	0.17045	0.19197
770.54		0.41358	0.48502	0.16699	0.19079
771.96		0.41476	0.486	0.17346	0.19107
773.39		0.40676	0.48398	0.17667	0.18239
774.81		0.42343	0.49078	0.17386	0.1933
776.24		0.42062	0.46618	0.1771	0.19471
777.66		0.43616	0.47578	0.17349	0.19362
779.08		0.41301	0.47215	0.16455	0.18485
780.51		0.42247	0.4739	0.17888	0.18695
781.93		0.43123	0.4878	0.17975	0.18318
783.36		0.43328	0.48994	0.17339	0.19051
784.78		0.42304	0.46882	0.17903	0.19176
786.21		0.42819	0.46788	0.18253	0.1875
787.63		0.42739	0.48038	0.17216	0.1848
789.05		0.42633	0.48081	0.18283	0.19132
790.48		0.41292	0.48481	0.17507	0.18815
791.9		0.42088	0.46501	0.17352	0.1845
793.33		0.43795	0.4636	0.17047	0.18397
794.75		0.43256	0.46575	0.16643	0.1871
796.18		0.41801	0.48228	0.17829	0.18767
797.6		0.43119	0.47437	0.18088	0.18899
799.02		0.42659	0.46803	0.16853	0.18993
800.45		0.42924	0.47792	0.18167	0.19182
801.87		0.41864	0.48842	0.17113	0.18367
803.3		0.42196	0.47961	0.16647	0.1855
804.72		0.41639	0.48002	0.17151	0.18719
806.15		0.42242	0.4809	0.17644	0.1933
807.57		0.42146	0.48033	0.1767	0.19241
808.99		0.42848	0.48422	0.17458	0.18898
810.42		0.42815	0.48551	0.17625	0.18671
811.84		0.43154	0.48573	0.17927	0.19303
813.27		0.42862	0.48638	0.17297	0.18769
814.69		0.42047	0.47359	0.17466	0.19853
816.12		0.43193	0.48464	0.1802	0.18819
817.54		0.42254	0.47792	0.1805	0.19354
818.96		0.43482	0.4801	0.17939	0.19322
820.39		0.42218	0.47677	0.17491	0.19452
821.81		0.42837	0.48361	0.17596	0.18614
823.24		0.43287	0.47432	0.16962	0.18705
824.66		0.42089	0.47779	0.1706	0.18648
826.09		0.43432	0.47839	0.18058	0.19196
827.51		0.42852	0.49829	0.17243	0.19347
828.93		0.43488	0.49322	0.17783	0.19305
830.36		0.42294	0.47866	0.1688	0.18201
831.78		0.43171	0.46328	0.17433	0.1906
833.21		0.4421	0.48805	0.17024	0.18481
834.63		0.44789	0.46961	0.17139	0.18942
836.06		0.41715	0.48683	0.17867	0.18537
837.48		0.43492	0.47908	0.17802	0.19089
838.9		0.43425	0.50841	0.1778	0.19726
840.33		0.42511	0.47194	0.1841	0.1903
841.75		0.42867	0.48996	0.17727	0.18624
843.18		0.41575	0.48296	0.17117	0.18861
844.6		0.42005	0.48616	0.17373	0.19573
846.03		0.43857	0.47474	0.17707	0.18324
847.45		0.43846	0.49559	0.17947	0.18855
848.87		0.43796	0.4866	0.17419	0.18789
850.3		0.42803	0.47464	0.17605	0.19493
851.72		0.42402	0.46835	0.16954	0.19293
853.15		0.42728	0.49045	0.18124	0.18926
854.57		0.44404	0.49099	0.18092	0.19423
856		0.42792	0.49191	0.17585	0.195
857.42		0.43762	0.48425	0.18222	0.18692
858.84		0.42303	0.48595	0.17334	0.18938
860.27		0.43436	0.49868	0.16874	0.18791
861.69		0.42361	0.47301	0.16794	0.19425
863.12		0.43152	0.49549	0.17756	0.1845
864.54		0.42986	0.49079	0.17197	0.18867
865.97		0.43226	0.50421	0.17199	0.18428
867.39		0.43831	0.48456	0.17678	0.18716
868.81		0.42814	0.48216	0.1753	0.19634
870.24		0.4364	0.47385	0.17951	0.19395
871.66		0.42549	0.50757	0.18102	0.19722
873.09		0.43338	0.49755	0.17868	0.1917
874.51		0.43188	0.4826	0.17576	0.19056
875.94		0.42309	0.47765	0.17945	0.19398
877.36		0.43666	0.4951	0.17458	0.1946
878.78		0.4433	0.48667	0.1831	0.19404
880.21		0.4336	0.49172	0.17195	0.19574
881.63		0.43376	0.48987	0.17395	0.1889
883.06		0.43149	0.49524	0.18169	0.19616
884.48		0.43189	0.48589	0.17783	0.19691
885.91		0.42335	0.47442	0.18018	0.1862
887.33		0.42515	0.48489	0.18744	0.19346
888.75		0.42312	0.49681	0.18171	0.18851
890.18		0.43193	0.48622	0.1809	0.19645
891.6		0.42808	0.49166	0.17269	0.19467
893.03		0.42966	0.48779	0.17333	0.18921
894.45		0.43352	0.48149	0.17735	0.18792
895.88		0.42257	0.48845	0.17879	0.19154
897.3		0.43627	0.48712	0.17807	0.18732
898.72		0.43423	0.49024	0.18239	0.19466
900.15		0.41984	0.48958	0.17406	0.19271
901.57		0.43369	0.48868	0.17817	0.19112
903		0.43228	0.4944	0.18004	0.19557
904.42		0.43611	0.49309	0.18067	0.18296
905.85		0.43506	0.50696	0.17376	0.19297
907.27		0.43653	0.49097	0.18284	0.18842
908.69		0.42687	0.50908	0.17046	0.1985
910.12		0.44115	0.48669	0.18117	0.19603
911.54		0.42588	0.48106	0.17971	0.19095
912.97		0.45295	0.50057	0.18134	0.2029
914.39		0.43594	0.50065	0.17831	0.18156
915.82		0.42658	0.47244	0.17686	0.18775
917.24		0.42548	0.49839	0.17207	0.19501
918.66		0.43286	0.49549	0.17848	0.18959
920.09		0.42755	0.47855	0.17843	0.19312
921.51		0.444	0.48732	0.17717	0.19182
922.94		0.43035	0.50401	0.17583	0.1817
924.36		0.44209	0.50814	0.17998	0.19558
925.79		0.42705	0.50167	0.18048	0.19293
927.21		0.44032	0.49193	0.18016	0.1995
928.63		0.43158	0.48195	0.17758	0.19301
930.06		0.42859	0.5065	0.18148	0.1981
931.48		0.43081	0.50081	0.18233	0.19425
932.91		0.44183	0.49777	0.17882	0.19534
934.33		0.43618	0.50222	0.1736	0.18918
935.76		0.42729	0.49929	0.17434	0.19868
937.18		0.43856	0.49872	0.17238	0.20281
938.6		0.42874	0.49138	0.17555	0.19478
940.03		0.43745	0.49534	0.16466	0.19283
941.45		0.43641	0.48703	0.17345	0.19727
942.88		0.44834	0.49164	0.18261	0.19944
944.3		0.4267	0.49688	0.16902	0.19483
945.73		0.43804	0.49371	0.17409	0.19851
947.15		0.43692	0.49925	0.17459	0.19218
948.57		0.43176	0.49278	0.17608	0.19059
950		0.42994	0.48645	0.17918	0.19408
951.42		0.41859	0.49024	0.1725	0.19243
952.85		0.44578	0.49689	0.18354	0.19147
954.27		0.43637	0.50888	0.1781	0.1928
955.7		0.44637	0.50718	0.1774	0.20245
957.12		0.43889	0.50697	0.18228	0.19247
958.54		0.43122	0.5004	0.17692	0.19415
959.97		0.43256	0.49258	0.18372	0.19295
961.39		0.43749	0.49806	0.17485	0.19294
962.82		0.43343	0.4911	0.17904	0.1944
964.24		0.43164	0.49402	0.17575	0.20108
965.67		0.44022	0.50353	0.17712	0.19954
967.09		0.4327	0.50059	0.17627	0.18877
968.51		0.44581	0.4869	0.17554	0.18716
969.94		0.42285	0.50809	0.17894	0.18923
971.36		0.43694	0.49892	0.18343	0.19939
972.79		0.43342	0.51103	0.17021	0.19375
974.21		0.44187	0.48591	0.17491	0.18871
975.64		0.43514	0.50313	0.18335	0.20241
977.06		0.43342	0.49495	0.18293	0.20178
978.48		0.4371	0.50793	0.17632	0.19484
979.91		0.43579	0.51196	0.17696	0.19005
981.33		0.43237	0.50913	0.18004	0.19745
982.76		0.42491	0.49638	0.17554	0.1964
984.18		0.43717	0.48615	0.19068	0.18478
985.61		0.45486	0.49319	0.18264	0.18974
987.03		0.4212	0.50661	0.17336	0.19656
988.45		0.44744	0.51538	0.17591	0.19134
989.88		0.43209	0.50283	0.18105	0.18943
991.3		0.43494	0.5074	0.18397	0.19531
992.73		0.45195	0.49216	0.17618	0.18935
994.15		0.44814	0.50199	0.18297	0.18857
995.58		0.43675	0.51095	0.17594	0.18453
997		0.45151	0.49202	0.17841	0.19462
998.42		0.43012	0.51109	0.18072	0.19118
999.85		0.45366	0.48944	0.17979	0.19545
1001.3		0.44184	0.50594	0.17397	0.19282
1002.7		0.44449	0.50066	0.18025	0.19343
1004.1		0.44189	0.49246	0.18148	0.18881
1005.5		0.43538	0.50811	0.17212	0.18926
1007		0.43826	0.49875	0.17277	0.19139
1008.4		0.43938	0.50204	0.17362	0.19459
1009.8		0.43398	0.51323	0.18742	0.18728
1011.2		0.4442	0.4978	0.18762	0.19455
1012.7		0.43597	0.49058	0.17721	0.19998
1014.1		0.44957	0.50442	0.18423	0.19508
1015.5		0.4489	0.49688	0.17726	0.18973
1016.9		0.44095	0.49603	0.17637	0.1897
1018.4		0.44552	0.50337	0.17335	0.18925
1019.8		0.43297	0.51724	0.17837	0.19708
1021.2		0.44128	0.50445	0.19385	0.203
1022.6		0.42251	0.50015	0.17481	0.19648
1024.1		0.44173	0.51474	0.183	0.19379
1025.5		0.44645	0.51207	0.18453	0.20287
1026.9		0.43686	0.50142	0.18235	0.20679
1028.3		0.44284	0.50887	0.18254	0.19718
1029.8		0.44258	0.49012	0.17878	0.18852
1031.2		0.42448	0.50793	0.18551	0.19673
1032.6		0.43677	0.50056	0.17234	0.19759
1034		0.45112	0.50804	0.1798	0.19196
1035.5		0.44459	0.50357	0.18374	0.1892
1036.9		0.43021	0.49748	0.18664	0.19336
1038.3		0.44992	0.49531	0.1829	0.1929
1039.7		0.43576	0.50217	0.1826	0.20047
1041.2		0.45428	0.47992	0.18659	0.1934
1042.6		0.44245	0.52152	0.18037	0.18843
1044		0.42907	0.50482	0.18785	0.19474
1045.4		0.44434	0.5066	0.17361	0.19109
1046.8		0.43413	0.50341	0.18063	0.19984
1048.3		0.44211	0.50569	0.17263	0.19203
1049.7		0.4484	0.5005	0.17633	0.19285
1051.1		0.44963	0.50378	0.1874	0.20223
1052.5		0.45117	0.51106	0.19413	0.18943
1054		0.44069	0.51101	0.18636	0.19686
1055.4		0.43601	0.50039	0.17823	0.19776
1056.8		0.4452	0.50829	0.18526	0.18868
1058.2		0.43396	0.50752	0.18272	0.2024
1059.7		0.43128	0.51591	0.18394	0.19866
1061.1		0.44813	0.49739	0.17113	0.19361
1062.5		0.44319	0.50308	0.18553	0.19953
1063.9		0.45215	0.50357	0.18433	0.2041
1065.4		0.4489	0.49767	0.18123	0.20462
1066.8		0.44986	0.49303	0.18343	0.19732
1068.2		0.44673	0.51264	0.17825	0.19121
1069.6		0.43877	0.50784	0.17661	0.19733
1071.1		0.44912	0.50894	0.17953	0.19707
1072.5		0.44943	0.49914	0.18858	0.19226
1073.9		0.44284	0.5023	0.17955	0.19842
1075.3		0.43357	0.49919	0.17519	0.19545
1076.8		0.4435	0.50693	0.18528	0.19859
1078.2		0.44442	0.50402	0.17442	0.19712
1079.6		0.45482	0.49949	0.17758	0.20872
1081		0.43796	0.50971	0.18763	0.19699
1082.5		0.43898	0.49289	0.18368	0.19675
1083.9		0.45132	0.5055	0.17553	0.19336
1085.3		0.4566	0.50788	0.18922	0.1963
1086.7		0.43611	0.50576	0.18737	0.19981
1088.2		0.44569	0.51138	0.18544	0.19775
1089.6		0.45651	0.51043	0.1772	0.19958
1091		0.45441	0.50439	0.17603	0.19965
1092.4		0.44894	0.51295	0.17391	0.19181
1093.9		0.46319	0.50108	0.18187	0.18988
1095.3		0.43754	0.49795	0.18023	0.19429
1096.7		0.4538	0.51384	0.1809	0.19406
1098.1		0.44242	0.51069	0.18092	0.20225
1099.5		0.4519	0.51646	0.1844	0.20197
1101		0.44064	0.51962	0.17574	0.20005
1102.4		0.44929	0.52022	0.1816	0.19109
1103.8		0.45369	0.51251	0.18071	0.20442
1105.2		0.4501	0.51978	0.18413	0.19922
1106.7		0.46234	0.49998	0.19236	0.20444
1108.1		0.45822	0.5065	0.18856	0.1965
1109.5		0.44396	0.50647	0.17568	0.20642
1110.9		0.44607	0.50344	0.18689	0.19949
1112.4		0.44836	0.50519	0.18976	0.20354
1113.8		0.44801	0.51246	0.18987	0.19374
1115.2		0.43992	0.50116	0.19042	0.20036
1116.6		0.44509	0.50531	0.1894	0.20129
1118.1		0.44833	0.51072	0.17825	0.19994
1119.5		0.44449	0.51129	0.17352	0.19474
1120.9		0.45255	0.50301	0.17563	0.19755
1122.3		0.44926	0.50302	0.18524	0.20297
1123.8		0.44154	0.51672	0.18468	0.20192
1125.2		0.43874	0.52558	0.17168	0.20159
1126.6		0.44401	0.52205	0.17799	0.19938
1128		0.44793	0.52827	0.18061	0.19886
1129.5		0.44581	0.51536	0.18127	0.19324
1130.9		0.43913	0.49166	0.19681	0.20234
1132.3		0.45063	0.50846	0.18574	0.20052
1133.7		0.44242	0.50855	0.18538	0.19876
1135.2		0.45698	0.51403	0.18423	0.20009
1136.6		0.44247	0.51921	0.18786	0.19273
1138		0.43517	0.52065	0.17709	0.19976
1139.4		0.4461	0.52732	0.17561	0.20357
1140.9		0.44287	0.5013	0.18459	0.19906
1142.3		0.45379	0.53123	0.17834	0.21113
1143.7		0.43521	0.50688	0.17901	0.20358
1145.1		0.43852	0.52029	0.18076	0.19769
1146.5		0.44785	0.51424	0.18476	0.19703
1148		0.44897	0.52293	0.18037	0.1936
1149.4		0.45392	0.51442	0.18347	0.19988
1150.8		0.45236	0.50714	0.18468	0.19391
1152.2		0.43833	0.51104	0.19021	0.19883
1153.7		0.45717	0.51984	0.17637	0.20434
1155.1		0.45313	0.50973	0.18278	0.20441
1156.5		0.44387	0.50358	0.18405	0.19964
1157.9		0.45467	0.52818	0.17974	0.19364
1159.4		0.44494	0.50519	0.18806	0.20351
1160.8		0.45086	0.50704	0.17885	0.19988
1162.2		0.44772	0.50887	0.18446	0.20116
1163.6		0.45256	0.50116	0.18902	0.20032
1165.1		0.45407	0.50362	0.17807	0.19561
1166.5		0.4507	0.52224	0.18503	0.20236
1167.9		0.44728	0.50036	0.17815	0.19383
1169.3		0.46436	0.51945	0.18567	0.19585
1170.8		0.44134	0.51631	0.17999	0.20066
1172.2		0.45488	0.5149	0.18048	0.20243
1173.6		0.45099	0.49747	0.18417	0.19931
1175		0.45285	0.52355	0.17754	0.20153
1176.5		0.44128	0.51798	0.18406	0.20048
1177.9		0.45676	0.51428	0.18039	0.20629
1179.3		0.44778	0.51286	0.17873	0.19087
1180.7		0.44243	0.52329	0.18385	0.1939
1182.2		0.45472	0.50911	0.1817	0.21081
1183.6		0.44989	0.51369	0.18206	0.20726
1185		0.44408	0.49694	0.18891	0.20236
1186.4		0.45138	0.51	0.18756	0.20555
1187.9		0.43566	0.49923	0.17864	0.18658
1189.3		0.44304	0.52932	0.18016	0.1992
1190.7		0.45842	0.52366	0.18127	0.20328
1192.1		0.44439	0.52383	0.18045	0.20407
1193.6		0.44484	0.51196	0.18315	0.20509
1195		0.44472	0.50449	0.18324	0.19932
1196.4		0.45739	0.49948	0.18916	0.19909
1197.8		0.44484	0.51265	0.19131	0.20377
1199.2		0.45256	0.50497	0.18505	0.2037
1200.7		0.44202	0.53023	0.18656	0.20487
1202.1		0.44916	0.52004	0.18607	0.19727
1203.5		0.44502	0.5235	0.18247	0.20081
1204.9		0.46332	0.5222	0.1821	0.20201
1206.4		0.44604	0.50778	0.17537	0.20892
1207.8		0.45235	0.51226	0.1912	0.19833
1209.2		0.45515	0.51604	0.17973	0.20683
1210.6		0.45581	0.52504	0.18404	0.20123
1212.1		0.44773	0.52922	0.17854	0.20064
1213.5		0.45404	0.52249	0.19271	0.20855
1214.9		0.45877	0.50543	0.18944	0.20677
1216.3		0.4633	0.51773	0.19423	0.19823
1217.8		0.45782	0.51474	0.18284	0.20848
1219.2		0.44118	0.51215	0.18095	0.20157
1220.6		0.45044	0.5222	0.18396	0.19891
1222		0.44708	0.52292	0.18512	0.2021
1223.5		0.44206	0.51678	0.18588	0.20071
1224.9		0.44394	0.50662	0.18516	0.20455
1226.3		0.44916	0.52941	0.18832	0.20212
1227.7		0.44567	0.50004	0.17848	0.20584
1229.2		0.45756	0.52737	0.18329	0.19732
1230.6		0.45501	0.5153	0.18248	0.20561
1232		0.4596	0.51049	0.19582	0.19624
1233.4		0.43965	0.50279	0.19744	0.19749
1234.9		0.44455	0.51631	0.18248	0.19976
1236.3		0.46979	0.51097	0.18689	0.19971
1237.7		0.46182	0.52815	0.1895	0.20245
1239.1		0.44746	0.52247	0.18252	0.20342
1240.6		0.44088	0.5052	0.18503	0.19667
1242		0.46205	0.5283	0.18774	0.20426
1243.4		0.44514	0.51049	0.18081	0.19907
1244.8		0.44745	0.52932	0.1792	0.20728
1246.2		0.43906	0.51927	0.18595	0.20653
1247.7		0.44552	0.51319	0.18025	0.19843
1249.1		0.44098	0.52636	0.18879	0.2028
1250.5		0.45931	0.52106	0.1822	0.20389
1251.9		0.44867	0.53121	0.17926	0.20017
1253.4		0.44795	0.50434	0.18019	0.20479
1254.8		0.44743	0.50653	0.18341	0.20016
1256.2		0.44388	0.52458	0.18472	0.20514
1257.6		0.46278	0.50786	0.18827	0.20099
1259.1		0.44532	0.50959	0.18947	0.20646
1260.5		0.46191	0.52941	0.18772	0.20812
1261.9		0.45877	0.51764	0.1839	0.19737
1263.3		0.4595	0.52829	0.18957	0.21233
1264.8		0.4518	0.52365	0.17759	0.20593
1266.2		0.45251	0.49997	0.18115	0.20692
1267.6		0.4593	0.50758	0.18591	0.20993
1269		0.44654	0.53111	0.17793	0.20632
1270.5		0.4604	0.50683	0.18478	0.20278
1271.9		0.45443	0.52687	0.18676	0.20327
1273.3		0.45787	0.51924	0.18552	0.21085
1274.7		0.44917	0.51384	0.18278	0.19365
1276.2		0.45552	0.53188	0.18185	0.20461
1277.6		0.44961	0.52728	0.19312	0.2022
1279		0.44391	0.51945	0.18944	0.19508
1280.4		0.44347	0.50634	0.18819	0.20395
1281.9		0.46039	0.52381	0.18563	0.20131
1283.3		0.44433	0.5282	0.19084	0.20745
1284.7		0.45693	0.51989	0.18762	0.19522
1286.1		0.46149	0.5134	0.18034	0.20447
1287.6		0.44081	0.5196	0.19305	0.19851
1289		0.45136	0.51633	0.1825	0.1996
1290.4		0.44699	0.534	0.18629	0.20234
1291.8		0.4477	0.52655	0.18883	0.19254
1293.3		0.45369	0.51504	0.18204	0.20816
1294.7		0.43974	0.52455	0.18565	0.19529
1296.1		0.45695	0.50533	0.18552	0.20603
1297.5		0.45986	0.51313	0.18676	0.19606
1298.9		0.44357	0.5027	0.17821	0.19719
1300.4		0.46028	0.51924	0.18734	0.20644
1301.8		0.45666	0.53158	0.1876	0.20654
1303.2		0.46299	0.51613	0.19328	0.2012
1304.6		0.44781	0.51757	0.19107	0.20249
1306.1		0.44706	0.51669	0.18547	0.20783
1307.5		0.44907	0.5054	0.1824	0.19983
1308.9		0.46576	0.52221	0.1913	0.20108
1310.3		0.46627	0.52986	0.18616	0.20818
1311.8		0.46899	0.5159	0.18466	0.20958
1313.2		0.46064	0.52635	0.18813	0.21522
1314.6		0.45267	0.52203	0.18673	0.21485
1316		0.45946	0.52883	0.17892	0.19862
1317.5		0.45051	0.52474	0.18793	0.20576
1318.9		0.45353	0.52635	0.18054	0.20419
1320.3		0.45839	0.52718	0.18245	0.19993
1321.7		0.44835	0.5207	0.18385	0.20109
1323.2		0.47021	0.52193	0.19211	0.1996
1324.6		0.45669	0.50768	0.1796	0.1984
1326		0.45747	0.51424	0.18024	0.20916
1327.4		0.45584	0.51593	0.18735	0.19969
1328.9		0.45873	0.51442	0.18434	0.20174
1330.3		0.46805	0.53197	0.18843	0.2108
1331.7		0.45703	0.51928	0.18979	0.20081
1333.1		0.44949	0.50657	0.19586	0.19831
1334.6		0.46454	0.5324	0.18596	0.20499
1336		0.4464	0.51243	0.18196	0.204
1337.4		0.45528	0.52056	0.17785	0.20861
1338.8		0.45332	0.52178	0.19106	0.20591
1340.3		0.44852	0.52629	0.17849	0.20482
1341.7		0.46157	0.53932	0.18843	0.21334
1343.1		0.45596	0.51582	0.18999	0.20026
1344.5		0.45827	0.53192	0.17994	0.21493
1345.9		0.45769	0.50547	0.18868	0.20477
1347.4		0.46343	0.52891	0.18696	0.20231
1348.8		0.4597	0.52613	0.18865	0.20008
1350.2		0.45879	0.52358	0.18915	0.20785
1351.6		0.44793	0.52043	0.19173	0.1988
1353.1		0.44961	0.51675	0.18757	0.20135
1354.5		0.46061	0.5319	0.19354	0.20313
1355.9		0.44742	0.50849	0.19321	0.20396
1357.3		0.46397	0.53546	0.18237	0.21171
1358.8		0.4489	0.53234	0.17455	0.19517
1360.2		0.46979	0.52518	0.19028	0.20648
1361.6		0.45385	0.51722	0.19708	0.20403
1363		0.46445	0.53348	0.18536	0.20884
1364.5		0.46313	0.548	0.1886	0.21158
1365.9		0.47073	0.51542	0.18705	0.21371
1367.3		0.45977	0.5188	0.1836	0.20456
1368.7		0.45881	0.50545	0.18248	0.20656
1370.2		0.43845	0.53266	0.18645	0.2094
1371.6		0.4597	0.52993	0.18397	0.20804
1373		0.45624	0.52866	0.17582	0.20284
1374.4		0.47981	0.52974	0.18232	0.21804
1375.9		0.44163	0.53567	0.1875	0.20546
1377.3		0.46305	0.52173	0.18981	0.20695
1378.7		0.45681	0.5176	0.18952	0.19469
1380.1		0.45321	0.52871	0.18288	0.20431
1381.6		0.46177	0.52623	0.19485	0.20922
1383		0.47823	0.53148	0.18593	0.20831
1384.4		0.46693	0.53077	0.18528	0.20791
1385.8		0.45756	0.51147	0.18953	0.20644
1387.3		0.45818	0.51788	0.19521	0.20442
1388.7		0.44683	0.53196	0.18926	0.20268
1390.1		0.45583	0.52054	0.19365	0.20874
1391.5		0.46298	0.5074	0.18721	0.19948
1393		0.46829	0.52087	0.1926	0.20794
1394.4		0.46819	0.54529	0.19157	0.21375
1395.8		0.46455	0.53191	0.18328	0.21278
1397.2		0.4618	0.53208	0.19546	0.20674
1398.6		0.45964	0.53699	0.18187	0.20912
1400.1		0.46023	0.53957	0.188	0.20014
1401.5		0.4473	0.53159	0.18672	0.20223
1402.9		0.45922	0.53242	0.18085	0.20809
1404.3		0.46633	0.51753	0.19105	0.21932
1405.8		0.46805	0.53832	0.19533	0.20595
1407.2		0.46864	0.53009	0.18352	0.21391
1408.6		0.46314	0.52831	0.19106	0.20442
1410		0.44771	0.52295	0.17703	0.20619
1411.5		0.47177	0.52938	0.18304	0.20298
1412.9		0.45198	0.5324	0.18387	0.21635
1414.3		0.45999	0.51523	0.19162	0.21408
1415.7		0.46278	0.5312	0.18882	0.20481
1417.2		0.45047	0.52397	0.19163	0.20971
1418.6		0.46917	0.52511	0.18509	0.1986
1420		0.4565	0.53152	0.18791	0.2037
1421.4		0.45538	0.52675	0.18746	0.2043
1422.9		0.4565	0.51764	0.19289	0.21338
1424.3		0.46207	0.53649	0.19398	0.20433
1425.7		0.46414	0.53162	0.19105	0.20823
1427.1		0.45967	0.52318	0.19615	0.21162
1428.6		0.45387	0.51714	0.19152	0.21129
1430		0.46524	0.51586	0.1892	0.21103
1431.4		0.47567	0.53285	0.18609	0.20671
1432.8		0.45785	0.51969	0.18505	0.20884
1434.3		0.47232	0.52178	0.18487	0.21746
1435.7		0.4458	0.53833	0.19534	0.20893
1437.1		0.47253	0.52446	0.18955	0.20681
1438.5		0.45816	0.54311	0.19122	0.20719
1440		0.46674	0.5272	0.18748	0.208
1441.4		0.45169	0.53627	0.18814	0.21459
1442.8		0.4593	0.5306	0.18386	0.20975
1444.2		0.48162	0.51951	0.18878	0.20472
1445.6		0.48336	0.54335	0.19337	0.20476
1447.1		0.45501	0.5159	0.18566	0.19099
1448.5		0.46128	0.5327	0.18913	0.21444
1449.9		0.47175	0.53864	0.181	0.20777
1451.3		0.46422	0.51872	0.18959	0.20576
1452.8		0.45783	0.54255	0.18906	0.20137
1454.2		0.46071	0.52621	0.19412	0.20465
1455.6		0.45152	0.54332	0.18471	0.20846
1457		0.46757	0.5287	0.18765	0.21191
1458.5		0.4667	0.50717	0.19275	0.20977
1459.9		0.47162	0.53406	0.1916	0.20875
1461.3		0.45439	0.54741	0.18998	0.20744
1462.7		0.4607	0.51686	0.18423	0.21099
1464.2		0.46654	0.53445	0.19299	0.2105
1465.6		0.44974	0.50349	0.18997	0.20431
1467		0.45771	0.51626	0.186	0.21168
1468.4		0.4651	0.53261	0.19477	0.20652
1469.9		0.46401	0.53745	0.18667	0.2056
1471.3		0.46395	0.51986	0.18434	0.21008
1472.7		0.45293	0.54279	0.20577	0.21083
1474.1		0.46214	0.54389	0.18043	0.2213
1475.6		0.4753	0.54066	0.18458	0.20983
1477		0.46939	0.52621	0.19477	0.21225
1478.4		0.45932	0.53029	0.19205	0.21127
1479.8		0.4607	0.54731	0.18533	0.20251
1481.3		0.46394	0.54005	0.19401	0.21059
1482.7		0.45916	0.52975	0.19125	0.21555
1484.1		0.46579	0.5392	0.19143	0.20598
1485.5		0.47308	0.52615	0.18121	0.20421
1487		0.46788	0.52667	0.17805	0.2094
1488.4		0.46595	0.53263	0.1917	0.21092
1489.8		0.47217	0.52997	0.19263	0.20935
1491.2		0.45447	0.52652	0.19027	0.21163
1492.7		0.46148	0.52257	0.19101	0.20841
1494.1		0.46456	0.52126	0.19867	0.21499
1495.5		0.46722	0.53046	0.18686	0.20347
1496.9		0.45783	0.55529	0.19596	0.20505
1498.3		0.47305	0.55035	0.18937	0.2051
1499.8		0.46996	0.55579	0.19158	0.20037
1501.2		0.47473	0.52247	0.18842	0.20332
1502.6		0.47093	0.52871	0.1821	0.20279
1504		0.46552	0.51954	0.18422	0.20385
1505.5		0.46741	0.53859	0.19105	0.21561
1506.9		0.48	0.52264	0.18586	0.20188
1508.3		0.46307	0.53392	0.18243	0.20798
1509.7		0.47341	0.52476	0.18271	0.20473
1511.2		0.45654	0.5255	0.19612	0.20305
1512.6		0.47431	0.52385	0.18134	0.20298
1514		0.46822	0.52135	0.18984	0.19993
1515.4		0.48638	0.54135	0.19411	0.22104
1516.9		0.4587	0.52219	0.18759	0.2121
1518.3		0.46559	0.52674	0.19813	0.20755
1519.7		0.46568	0.51521	0.18693	0.20299
1521.1		0.45536	0.54452	0.18571	0.19873
1522.6		0.46777	0.53355	0.1967	0.2055
1524		0.45914	0.53441	0.18843	0.21239
1525.4		0.46146	0.52534	0.19178	0.21569
1526.8		0.47889	0.53499	0.19317	0.20815
1528.3		0.45571	0.53539	0.19768	0.21822
1529.7		0.45976	0.53432	0.18321	0.2092
1531.1		0.46967	0.53875	0.18744	0.21299
1532.5		0.45444	0.54202	0.1953	0.20857
1534		0.46307	0.52384	0.1961	0.21716
1535.4		0.46654	0.53766	0.19042	0.21032
1536.8		0.47616	0.5334	0.18519	0.21673
1538.2		0.45818	0.53034	0.18782	0.20466
1539.7		0.45775	0.53222	0.19505	0.21051
1541.1		0.47279	0.52377	0.19458	0.21753
1542.5		0.47252	0.5356	0.19534	0.2084
1543.9		0.46734	0.53367	0.19133	0.21025
1545.3		0.45416	0.53624	0.1883	0.21378
1546.8		0.47152	0.52244	0.189	0.21264
1548.2		0.46663	0.52861	0.1876	0.20936
1549.6		0.46584	0.51849	0.19402	0.2112
1551		0.47762	0.53616	0.19943	0.20932
1552.5		0.47989	0.54145	0.1874	0.20985
1553.9		0.47871	0.54002	0.20066	0.21738
1555.3		0.46329	0.53199	0.19586	0.20848
1556.7		0.46428	0.52997	0.19096	0.21553
1558.2		0.47304	0.53001	0.20919	0.20584
1559.6		0.47022	0.53414	0.19304	0.21361
1561		0.4685	0.54121	0.19118	0.20822
1562.4		0.46829	0.53607	0.18705	0.21521
1563.9		0.45681	0.53543	0.18319	0.20185
1565.3		0.47079	0.52371	0.18866	0.21428
1566.7		0.477	0.53822	0.18738	0.21249
1568.1		0.4657	0.53035	0.1901	0.21247
1569.6		0.46957	0.51776	0.18887	0.21075
1571		0.46604	0.52713	0.1964	0.20715
1572.4		0.46529	0.53975	0.19706	0.21026
1573.8		0.47016	0.54035	0.19343	0.21523
1575.3		0.47056	0.5292	0.19703	0.20292
1576.7		0.46423	0.54195	0.18945	0.21887
1578.1		0.47159	0.53309	0.19942	0.20849
1579.5		0.45395	0.512	0.19688	0.2114
1581		0.46915	0.52195	0.20085	0.22003
1582.4		0.47391	0.53461	0.18309	0.20572
1583.8		0.46995	0.5324	0.18928	0.2131
1585.2		0.46362	0.52319	0.19106	0.21029
1586.7		0.46512	0.52685	0.19049	0.21298
1588.1		0.4642	0.53209	0.19624	0.21305
1589.5		0.46131	0.52628	0.18788	0.20942
1590.9		0.46696	0.5364	0.18974	0.22077
1592.4		0.4684	0.54474	0.1876	0.2148
1593.8		0.46124	0.54006	0.19465	0.21133
1595.2		0.45566	0.53423	0.19042	0.21401
1596.6		0.46361	0.54404	0.19023	0.21454
1598		0.4707	0.54008	0.19079	0.21081
1599.5		0.48006	0.52566	0.19023	0.20494
1600.9		0.4631	0.53785	0.19015	0.2123
1602.3		0.47169	0.52959	0.19295	0.21452
1603.7		0.47708	0.53152	0.18348	0.2104
1605.2		0.46403	0.53917	0.19289	0.2128
1606.6		0.46314	0.52442	0.19279	0.2113
1608		0.46213	0.53354	0.18376	0.20934
1609.4		0.4666	0.54441	0.19126	0.20572
1610.9		0.48748	0.5243	0.18995	0.21868
1612.3		0.46247	0.53594	0.18869	0.20267
1613.7		0.4601	0.5452	0.19367	0.21427
1615.1		0.4728	0.53372	0.19678	0.20886
1616.6		0.46351	0.53428	0.20301	0.20635
1618		0.46641	0.53938	0.19568	0.21055
1619.4		0.4792	0.52945	0.19015	0.21812
1620.8		0.47522	0.52818	0.19083	0.21091
1622.3		0.45554	0.53883	0.19218	0.2133
1623.7		0.47254	0.53495	0.19526	0.21518
1625.1		0.46503	0.53866	0.19665	0.21688
1626.5		0.47339	0.52966	0.19082	0.21449
1628		0.45762	0.53705	0.20254	0.22027
1629.4		0.48382	0.53353	0.19352	0.21476
1630.8		0.46985	0.54068	0.19226	0.21336
1632.2		0.46081	0.53454	0.19038	0.21597
1633.7		0.45269	0.53924	0.18688	0.2064
1635.1		0.47322	0.52714	0.19367	0.21488
1636.5		0.46404	0.53095	0.1784	0.21029
1637.9		0.44726	0.54251	0.19522	0.21504
1639.4		0.46981	0.54023	0.19584	0.20858
1640.8		0.4729	0.53424	0.19914	0.21429
1642.2		0.47741	0.52849	0.19815	0.21389
1643.6		0.47854	0.52618	0.19106	0.21404
1645		0.47628	0.52709	0.19026	0.20924
1646.5		0.47225	0.53261	0.19256	0.21321
1647.9		0.45907	0.53109	0.19445	0.20245
1649.3		0.45857	0.53906	0.19005	0.21536
1650.7		0.4689	0.53007	0.18718	0.22002
1652.2		0.47884	0.54318	0.18743	0.21224
1653.6		0.4661	0.52807	0.19724	0.21479
1655		0.46847	0.53113	0.18425	0.21751
1656.4		0.49088	0.53732	0.19286	0.21756
1657.9		0.46497	0.53645	0.1925	0.21491
1659.3		0.47996	0.54267	0.19607	0.20904
1660.7		0.4654	0.52817	0.19898	0.20189
1662.1		0.46945	0.53864	0.19725	0.21612
1663.6		0.46899	0.54952	0.1878	0.2135
1665		0.47346	0.54349	0.19599	0.21415
1666.4		0.46329	0.53664	0.18648	0.20886
1667.8		0.47296	0.52584	0.18605	0.20971
1669.3		0.47013	0.53928	0.1905	0.21231
1670.7		0.47697	0.54113	0.19315	0.21168
1672.1		0.48421	0.53745	0.19613	0.22524
1673.5		0.46827	0.55022	0.20253	0.21307
1675		0.46786	0.53722	0.19706	0.22034
1676.4		0.47051	0.56133	0.19795	0.21601
1677.8		0.45388	0.53723	0.1963	0.21867
1679.2		0.47261	0.53007	0.1901	0.21794
1680.7		0.46872	0.53747	0.20087	0.21635
1682.1		0.47074	0.53722	0.19315	0.2163
1683.5		0.46988	0.5472	0.19362	0.20873
1684.9		0.45862	0.53071	0.20483	0.21004
1686.4		0.48736	0.52892	0.19008	0.21241
1687.8		0.48156	0.53842	0.19668	0.21974
1689.2		0.48229	0.5347	0.19386	0.21443
1690.6		0.48501	0.54226	0.187	0.21311
1692.1		0.46804	0.55206	0.20011	0.2166
1693.5		0.45716	0.5329	0.19642	0.21751
1694.9		0.46257	0.52511	0.19573	0.21697
1696.3		0.46746	0.53908	0.19834	0.20814
1697.7		0.46083	0.54547	0.19628	0.20414
1699.2		0.46002	0.52437	0.19904	0.2205
1700.6		0.46729	0.53818	0.1947	0.21037
1702		0.46635	0.53853	0.18675	0.20737
1703.4		0.46425	0.53376	0.18995	0.21259
1704.9		0.47463	0.54468	0.1886	0.20664
1706.3		0.46965	0.53699	0.19011	0.20872
1707.7		0.47866	0.52738	0.19731	0.2107
1709.1		0.47572	0.53675	0.18988	0.21578
1710.6		0.45531	0.54693	0.19555	0.21198
1712		0.46877	0.5476	0.1966	0.21616
1713.4		0.47087	0.55709	0.19319	0.21527
1714.8		0.47362	0.55151	0.19354	0.21039
1716.3		0.47277	0.54922	0.19303	0.21386
1717.7		0.46713	0.53989	0.18939	0.2157
1719.1		0.47138	0.54801	0.19533	0.21532
1720.5		0.46514	0.53635	0.19442	0.20705
1722		0.47036	0.54381	0.20201	0.20743
1723.4		0.46901	0.54229	0.18852	0.2217
1724.8		0.47442	0.54396	0.1903	0.21501
1726.2		0.47066	0.52992	0.1905	0.21404
1727.7		0.47121	0.53707	0.19548	0.22362
1729.1		0.46389	0.55159	0.1947	0.20978
1730.5		0.47395	0.53114	0.18856	0.21331
1731.9		0.4784	0.52596	0.19304	0.21804
1733.4		0.46453	0.55183	0.19879	0.22657
1734.8		0.47255	0.54784	0.19422	0.21147
1736.2		0.47374	0.52427	0.18821	0.22121
1737.6		0.47009	0.53454	0.19097	0.22088
1739.1		0.46016	0.55353	0.19799	0.21941
1740.5		0.4657	0.54703	0.19672	0.21378
1741.9		0.46591	0.54583	0.19961	0.21804
1743.3		0.47257	0.54447	0.18735	0.2248
1744.7		0.4701	0.52821	0.18521	0.21532
1746.2		0.47181	0.54114	0.1902	0.21444
1747.6		0.47111	0.51378	0.19413	0.21527
1749		0.47466	0.53835	0.19857	0.21675
1750.4		0.4866	0.52394	0.19668	0.22089
1751.9		0.46393	0.54993	0.19245	0.2176
1753.3		0.48371	0.54844	0.20446	0.21352
1754.7		0.46662	0.53827	0.19461	0.21957
1756.1		0.46265	0.5436	0.19906	0.21519
1757.6		0.48126	0.53985	0.19865	0.22267
1759		0.46952	0.52702	0.19483	0.21793
1760.4		0.4795	0.5402	0.19572	0.21224
1761.8		0.48732	0.54188	0.1895	0.22192
1763.3		0.47315	0.54588	0.19274	0.21469
1764.7		0.48286	0.54748	0.20007	0.21456
1766.1		0.47732	0.5521	0.19124	0.21811
1767.5		0.47464	0.54141	0.19293	0.21381
1769		0.46417	0.53223	0.19695	0.22274
1770.4		0.46551	0.52602	0.19453	0.21247
1771.8		0.46	0.54025	0.18703	0.21899
1773.2		0.47104	0.52692	0.19513	0.21805
1774.7		0.47019	0.54653	0.20121	0.20844
1776.1		0.4781	0.55351	0.19043	0.21103
1777.5		0.46805	0.53779	0.19513	0.21823
1778.9		0.47437	0.54122	0.18666	0.21074
1780.4		0.45451	0.53498	0.19142	0.21317
1781.8		0.47213	0.52503	0.1977	0.21711
1783.2		0.46223	0.53962	0.19758	0.20941
1784.6		0.46674	0.56741	0.19882	0.21475
1786.1		0.4696	0.54282	0.19774	0.20354
1787.5		0.4731	0.55332	0.1961	0.21245
1788.9		0.476	0.54558	0.19549	0.2117
1790.3		0.5031	0.53555	0.20415	0.21127
1791.8		0.4796	0.5218	0.19348	0.2167
1793.2		0.48502	0.53344	0.18666	0.22409
1794.6		0.47863	0.53248	0.19937	0.21871
1796		0.48068	0.53996	0.19472	0.21352
1797.4		0.46929	0.51959	0.19042	0.21676
1798.9		0.4775	0.54375	0.20104	0.2143
1800.3		0.46938	0.53566	0.19418	0.22465
1801.7		0.475	0.55286	0.19967	0.21997
1803.1		0.49109	0.5463	0.19803	0.21797
1804.6		0.48251	0.52576	0.19129	0.21208
1806		0.45927	0.544	0.18868	0.21969
1807.4		0.47847	0.54885	0.18687	0.21777
1808.8		0.48623	0.55022	0.19804	0.22424
1810.3		0.48532	0.52206	0.19801	0.22209
1811.7		0.47416	0.542	0.19647	0.21328
1813.1		0.46897	0.53559	0.18822	0.21738
1814.5		0.47432	0.52298	0.19294	0.21132
1816		0.47926	0.54388	0.18984	0.21865
1817.4		0.48215	0.54978	0.18744	0.22557
1818.8		0.46751	0.55109	0.19689	0.20948
1820.2		0.47524	0.55493	0.19367	0.21703
1821.7		0.47768	0.54347	0.19178	0.21667
1823.1		0.46078	0.54914	0.20454	0.21936
1824.5		0.46921	0.54145	0.20088	0.21362
1825.9		0.47024	0.54189	0.19383	0.22327
1827.4		0.46981	0.55458	0.2004	0.21716
1828.8		0.48947	0.53494	0.20846	0.22507
1830.2		0.46573	0.54087	0.18715	0.2184
1831.6		0.45756	0.54265	0.19518	0.21893
1833.1		0.46978	0.53919	0.19097	0.22958
1834.5		0.48961	0.54362	0.19329	0.21422
1835.9		0.47536	0.53859	0.19373	0.2116
1837.3		0.49094	0.55513	0.19888	0.21914
1838.8		0.49012	0.54617	0.20058	0.21612
1840.2		0.46974	0.5351	0.19579	0.21943
1841.6		0.48994	0.55707	0.18867	0.22103
1843		0.47633	0.54517	0.18403	0.21293
1844.4		0.48829	0.55183	0.1998	0.22358
1845.9		0.48093	0.54819	0.18842	0.21848
1847.3		0.48268	0.54752	0.20373	0.21483
1848.7		0.46796	0.54702	0.20136	0.22391
1850.1		0.48579	0.53001	0.19539	0.22419
1851.6		0.46019	0.53698	0.19841	0.21527
1853		0.4783	0.54267	0.20614	0.22022
1854.4		0.48175	0.54977	0.19973	0.22106
1855.8		0.4634	0.55732	0.19982	0.22426
1857.3		0.47642	0.53174	0.19312	0.22484
1858.7		0.47624	0.54696	0.19004	0.21901
1860.1		0.49417	0.53939	0.20641	0.22356
1861.5		0.46368	0.5474	0.20287	0.21244
1863		0.481	0.54849	0.19716	0.22633
1864.4		0.48175	0.54661	0.20035	0.219
1865.8		0.47698	0.55682	0.20336	0.21631
1867.2		0.4793	0.55307	0.20082	0.20862
1868.7		0.48468	0.52617	0.199	0.22064
1870.1		0.47634	0.53257	0.19595	0.21498
1871.5		0.47603	0.54218	0.2017	0.21913
1872.9		0.47022	0.54743	0.19269	0.22886
1874.4		0.47718	0.54143	0.20492	0.22905
1875.8		0.46155	0.55248	0.20394	0.22649
1877.2		0.46713	0.55596	0.19674	0.22114
1878.6		0.47071	0.56366	0.20175	0.21289
1880.1		0.48354	0.55137	0.2071	0.21975
1881.5		0.47181	0.54789	0.19691	0.22493
1882.9		0.4878	0.53807	0.19579	0.22521
1884.3		0.47723	0.54484	0.20007	0.21489
1885.8		0.45945	0.55172	0.20011	0.21317
1887.2		0.47511	0.55039	0.18928	0.21378
1888.6		0.48584	0.52612	0.19094	0.21808
1890		0.47237	0.55607	0.19869	0.2179
1891.5		0.4789	0.53744	0.20778	0.21999
1892.9		0.47814	0.54484	0.195	0.21778
1894.3		0.48627	0.55357	0.20129	0.21778
1895.7		0.468	0.54543	0.19736	0.21445
1897.1		0.47582	0.53899	0.19549	0.2209
1898.6		0.46994	0.5471	0.19414	0.21904
1900		0.47162	0.54992	0.1923	0.2138
1901.4		0.48064	0.53506	0.19953	0.22028
1902.8		0.48777	0.54685	0.19196	0.219
1904.3		0.47954	0.53589	0.20233	0.21707
1905.7		0.48628	0.54547	0.19807	0.22177
1907.1		0.4783	0.53804	0.19325	0.22087
1908.5		0.46682	0.54725	0.19248	0.21158
1910		0.47941	0.5419	0.19095	0.21558
1911.4		0.47674	0.53128	0.19209	0.2232
1912.8		0.47497	0.54305	0.19832	0.219
1914.2		0.48556	0.53181	0.20254	0.21876
1915.7		0.47353	0.53725	0.1945	0.21869
1917.1		0.47955	0.54677	0.1856	0.21482
1918.5		0.485	0.54096	0.19642	0.21789
1919.9		0.47058	0.52764	0.20148	0.21605
1921.4		0.46484	0.53487	0.2013	0.21717
1922.8		0.46111	0.54041	0.20328	0.22571
1924.2		0.48663	0.55049	0.19669	0.21313
1925.6		0.47876	0.54689	0.20336	0.22201
1927.1		0.47492	0.5361	0.19838	0.21389
1928.5		0.48914	0.5259	0.19825	0.21645
1929.9		0.48715	0.55109	0.19655	0.21403
1931.3		0.46958	0.54531	0.19474	0.21843
1932.8		0.47788	0.54819	0.20382	0.21933
1934.2		0.46541	0.54736	0.19612	0.22327
1935.6		0.48435	0.54013	0.20376	0.2198
1937		0.48582	0.53419	0.19404	0.21759
1938.5		0.47926	0.54713	0.19819	0.21719
1939.9		0.48186	0.53988	0.20374	0.2155
1941.3		0.4731	0.54392	0.19704	0.22093
1942.7		0.4763	0.52115	0.20558	0.22735
1944.1		0.46987	0.52823	0.19799	0.21973
1945.6		0.47842	0.53856	0.19808	0.22031
1947		0.47659	0.55037	0.20025	0.21124
1948.4		0.47448	0.56856	0.19165	0.21647
1949.8		0.48814	0.53159	0.20295	0.21549
1951.3		0.47265	0.53971	0.20224	0.22437
1952.7		0.4695	0.53477	0.19409	0.21597
1954.1		0.48857	0.54094	0.19423	0.22693
1955.5		0.4752	0.55118	0.20234	0.21965
1957		0.4783	0.54043	0.19388	0.22351
1958.4		0.47792	0.54431	0.19661	0.22132
1959.8		0.47	0.56926	0.19832	0.21921
1961.2		0.48193	0.54442	0.19505	0.22198
1962.7		0.47743	0.5451	0.19624	0.22463
1964.1		0.48215	0.55882	0.20242	0.21717
1965.5		0.48805	0.53003	0.20256	0.21923
1966.9		0.48498	0.5533	0.20165	0.2234
1968.4		0.4705	0.5396	0.19911	0.22276
1969.8		0.4712	0.54597	0.19816	0.21871
1971.2		0.46761	0.54986	0.20028	0.22686
1972.6		0.47571	0.54611	0.20537	0.22929
1974.1		0.47025	0.55515	0.20746	0.21899
1975.5		0.46338	0.53991	0.20573	0.21924
1976.9		0.47956	0.54868	0.19614	0.21813
1978.3		0.47495	0.53831	0.19825	0.22353
1979.8		0.47886	0.5415	0.20227	0.22043
1981.2		0.4847	0.55951	0.20094	0.22233
1982.6		0.47768	0.53567	0.19242	0.2153
1984		0.47234	0.55225	0.19843	0.22136
1985.5		0.46837	0.53924	0.20026	0.21504
1986.9		0.46428	0.56252	0.19014	0.21991
1988.3		0.48327	0.55322	0.19449	0.21491
1989.7		0.48061	0.5602	0.2008	0.21849
1991.2		0.48288	0.55253	0.18496	0.22483
1992.6		0.48132	0.54331	0.20111	0.21676
1994		0.48944	0.53746	0.19505	0.22837
1995.4		0.47459	0.54828	0.19419	0.2213
1996.8		0.49022	0.54201	0.20152	0.21411
1998.3		0.47126	0.55233	0.20074	0.22698
1999.7		0.47414	0.55843	0.20313	0.21637
2001.1		0.48578	0.53344	0.19986	0.22751
2002.5		0.48216	0.55195	0.19975	0.21766
2004		0.49416	0.53924	0.20266	0.22471
2005.4		0.46917	0.54366	0.19693	0.21833
2006.8		0.48792	0.55717	0.20155	0.21869
2008.2		0.48044	0.55434	0.20152	0.22219
2009.7		0.49007	0.55598	0.19506	0.223
2011.1		0.47466	0.54138	0.19463	0.22209
2012.5		0.4821	0.54762	0.19907	0.21664
2013.9		0.48262	0.52317	0.19491	0.21809
2015.4		0.49376	0.54246	0.19827	0.22773
2016.8		0.47067	0.55192	0.20212	0.21416
2018.2		0.48716	0.55169	0.19066	0.22544
2019.6		0.47736	0.54495	0.20517	0.22141
2021.1		0.47233	0.55228	0.20294	0.21757
2022.5		0.47598	0.54555	0.20065	0.22707
2023.9		0.48975	0.55612	0.19491	0.22514
2025.3		0.48807	0.54401	0.1968	0.2248
2026.8		0.47608	0.54768	0.19658	0.22304
2028.2		0.4852	0.55642	0.19922	0.22227
2029.6		0.46645	0.54228	0.20549	0.22701
2031		0.47423	0.54848	0.20174	0.2176
2032.5		0.48415	0.56205	0.20346	0.21872
2033.9		0.4951	0.51896	0.19688	0.22584
2035.3		0.48077	0.55381	0.20223	0.21533
2036.7		0.49054	0.54952	0.19344	0.21959
2038.2		0.47926	0.53718	0.19271	0.22062
2039.6		0.48368	0.54361	0.1986	0.22246
2041		0.46386	0.54576	0.2092	0.21984
2042.4		0.49335	0.54304	0.20164	0.22743
2043.8		0.4916	0.55208	0.19555	0.22338
2045.3		0.47977	0.55496	0.19747	0.22337
2046.7		0.47941	0.54565	0.20054	0.21761
2048.1		0.47871	0.54111	0.19004	0.22179
2049.5		0.48197	0.54267	0.19405	0.22867
2051		0.47134	0.54915	0.19785	0.22233
2052.4		0.4794	0.52567	0.20733	0.21597
2053.8		0.49811	0.54849	0.20236	0.22257
2055.2		0.49065	0.54624	0.19554	0.22489
2056.7		0.49323	0.5351	0.19759	0.22714
2058.1		0.47757	0.54287	0.20436	0.22347
2059.5		0.47772	0.5553	0.19416	0.22744
2060.9		0.47513	0.53315	0.20449	0.2311
2062.4		0.48181	0.55477	0.19853	0.22211
2063.8		0.49071	0.54368	0.19913	0.22902
2065.2		0.48177	0.54705	0.20041	0.22884
2066.6		0.47146	0.56252	0.20055	0.21756
2068.1		0.47607	0.55103	0.20221	0.22301
2069.5		0.47795	0.55641	0.20452	0.22283
2070.9		0.48253	0.54316	0.19847	0.21708
2072.3		0.49411	0.55369	0.20543	0.22897
2073.8		0.48138	0.5615	0.20065	0.22242
2075.2		0.47906	0.56058	0.19479	0.22254
2076.6		0.48417	0.53499	0.19861	0.23399
2078		0.48405	0.55647	0.20349	0.22624
2079.5		0.47475	0.54691	0.20744	0.2269
2080.9		0.48414	0.56794	0.2107	0.22645
2082.3		0.48237	0.55381	0.1887	0.2266
2083.7		0.47574	0.53798	0.20446	0.22733
2085.2		0.48377	0.54581	0.19426	0.22886
2086.6		0.48195	0.55148	0.19886	0.21789
2088		0.47305	0.55658	0.20521	0.2288
2089.4		0.49088	0.54955	0.19494	0.2333
2090.9		0.49394	0.54819	0.20213	0.22284
2092.3		0.48253	0.53991	0.19749	0.21754
2093.7		0.48545	0.54958	0.2074	0.215
2095.1		0.47928	0.5632	0.20663	0.21264
2096.5		0.4675	0.54221	0.19833	0.21611
2098		0.48642	0.55187	0.20061	0.22426
2099.4		0.47716	0.53864	0.20238	0.232
2100.8		0.47962	0.54701	0.20345	0.21979
2102.2		0.47121	0.52538	0.19691	0.21363
2103.7		0.48884	0.53716	0.19199	0.22051
2105.1		0.48445	0.56073	0.19673	0.22151
2106.5		0.48829	0.5483	0.20206	0.21713
2107.9		0.48758	0.55068	0.19528	0.22201
2109.4		0.48419	0.55066	0.20126	0.22623
2110.8		0.48574	0.55116	0.2012	0.2227
2112.2		0.49379	0.54569	0.20318	0.2271
2113.6		0.48084	0.55634	0.19748	0.22871
2115.1		0.4942	0.5332	0.2004	0.23035
2116.5		0.48592	0.54822	0.20521	0.22393
2117.9		0.47857	0.54217	0.20526	0.22357
2119.3		0.47637	0.53591	0.20291	0.21987
2120.8		0.49175	0.54363	0.20908	0.21226
2122.2		0.48325	0.54397	0.20589	0.22323
2123.6		0.48983	0.55206	0.20415	0.21523
2125		0.48035	0.5571	0.21176	0.2223
2126.5		0.49208	0.55915	0.20656	0.2344
2127.9		0.48048	0.55124	0.21455	0.22158
2129.3		0.48784	0.54271	0.2115	0.21986
2130.7		0.47318	0.54486	0.21044	0.22638
2132.2		0.48093	0.54321	0.20654	0.22511
2133.6		0.49619	0.55167	0.1966	0.21663
2135		0.48555	0.55406	0.19586	0.22231
2136.4		0.49719	0.54579	0.20843	0.22286
2137.9		0.48249	0.55133	0.20454	0.22562
2139.3		0.47712	0.53173	0.20834	0.22434
2140.7		0.4909	0.53619	0.20648	0.22384
2142.1		0.48651	0.55925	0.18924	0.21173
2143.5		0.49301	0.55371	0.19841	0.22247
2145		0.49066	0.55407	0.19773	0.22436
2146.4		0.49407	0.54987	0.20133	0.21419
2147.8		0.48745	0.54075	0.20221	0.22823
2149.2		0.4863	0.54641	0.20147	0.22977
2150.7		0.47926	0.55047	0.20183	0.22918
2152.1		0.47104	0.53455	0.19627	0.22087
2153.5		0.47764	0.54461	0.20119	0.22718
2154.9		0.48675	0.54382	0.20208	0.22916
2156.4		0.48255	0.54962	0.20433	0.22729
2157.8		0.49462	0.54667	0.20758	0.22863
2159.2		0.48087	0.53841	0.1938	0.23077
2160.6		0.48214	0.55096	0.19864	0.22234
2162.1		0.48767	0.54179	0.19207	0.22924
2163.5		0.48948	0.55079	0.19754	0.22642
2164.9		0.49394	0.54822	0.19988	0.21909
2166.3		0.47321	0.54526	0.19317	0.2241
2167.8		0.48581	0.55152	0.20055	0.22311
2169.2		0.49339	0.54968	0.2111	0.24162
2170.6		0.48507	0.55906	0.19679	0.23104
2172		0.48343	0.53678	0.19917	0.21765
2173.5		0.48258	0.54895	0.20015	0.23103
2174.9		0.49523	0.54873	0.20212	0.22385
2176.3		0.47835	0.55679	0.2007	0.22384
2177.7		0.48615	0.55756	0.19958	0.23267
2179.2		0.48149	0.56393	0.20426	0.23398
2180.6		0.48894	0.53459	0.20589	0.22544
2182		0.48175	0.53497	0.19799	0.22525
2183.4		0.47581	0.53972	0.20575	0.22503
2184.9		0.47731	0.55359	0.21083	0.23057
2186.3		0.47795	0.55166	0.20614	0.22768
2187.7		0.46589	0.55121	0.20151	0.23323
2189.1		0.46645	0.54293	0.20976	0.23021
2190.6		0.48314	0.54763	0.20201	0.22947
2192		0.47398	0.55792	0.20687	0.22593
2193.4		0.49148	0.54019	0.20262	0.22307
2194.8		0.48029	0.54031	0.20245	0.23172
2196.2		0.46932	0.55132	0.20967	0.22425
2197.7		0.49116	0.56525	0.20418	0.21751
2199.1		0.49336	0.53392	0.21262	0.22124
2200.5		0.48917	0.54831	0.20617	0.22528
2201.9		0.48655	0.55096	0.19705	0.22125
2203.4		0.49823	0.55144	0.19999	0.23333
2204.8		0.48146	0.54644	0.19772	0.21988
2206.2		0.49293	0.54639	0.2044	0.23159
2207.6		0.48415	0.56546	0.20519	0.22771
2209.1		0.48747	0.55998	0.1983	0.22158
2210.5		0.46663	0.55383	0.20783	0.2272
2211.9		0.47993	0.56963	0.20193	0.21996
2213.3		0.48309	0.57025	0.20313	0.22497
2214.8		0.47871	0.57451	0.212	0.21827
2216.2		0.4718	0.55106	0.19519	0.22667
2217.6		0.48086	0.55634	0.20059	0.22985
2219		0.47811	0.55973	0.21002	0.22118
2220.5		0.50209	0.54864	0.19749	0.22595
2221.9		0.48492	0.55272	0.21148	0.23144
2223.3		0.48009	0.53227	0.20422	0.22248
2224.7		0.48255	0.55836	0.20006	0.22987
2226.2		0.47442	0.53643	0.1996	0.22395
2227.6		0.48937	0.54812	0.19917	0.22712
2229		0.47661	0.56096	0.1958	0.22639
2230.4		0.47777	0.55386	0.20022	0.2249
2231.9		0.48312	0.553	0.19577	0.22106
2233.3		0.48359	0.55779	0.20002	0.22296
2234.7		0.49548	0.55858	0.19763	0.22972
2236.1		0.49561	0.55987	0.20511	0.22451
2237.6		0.49665	0.55091	0.19794	0.21946
2239		0.47572	0.54474	0.21511	0.23717
2240.4		0.47863	0.55218	0.19479	0.22913
2241.8		0.491	0.56588	0.19663	0.21842
2243.2		0.48448	0.57344	0.20335	0.22387
2244.7		0.48599	0.55684	0.20417	0.23818
2246.1		0.48211	0.5479	0.19577	0.22886
2247.5		0.46445	0.56444	0.19731	0.22604
2248.9		0.47468	0.55912	0.19523	0.21608
2250.4		0.49089	0.57039	0.20716	0.23386
2251.8		0.49601	0.55983	0.20205	0.23369
2253.2		0.4968	0.552	0.20565	0.22585
2254.6		0.48812	0.56093	0.20246	0.22967
2256.1		0.49619	0.55054	0.20741	0.22544
2257.5		0.48707	0.55899	0.19915	0.22661
2258.9		0.46747	0.54448	0.21193	0.22801
2260.3		0.48019	0.55879	0.20749	0.21914
2261.8		0.47964	0.55456	0.205	0.22112
2263.2		0.48376	0.55301	0.20458	0.22381
2264.6		0.4787	0.56303	0.20173	0.22354
2266		0.46894	0.55876	0.20787	0.23147
2267.5		0.48674	0.55551	0.19948	0.22215
2268.9		0.48687	0.53714	0.20336	0.2386
2270.3		0.46748	0.5487	0.20378	0.22747
2271.7		0.47642	0.56425	0.20607	0.22683
2273.2		0.48714	0.55231	0.20307	0.22538
2274.6		0.48944	0.56185	0.20725	0.22333
2276		0.49409	0.54665	0.1997	0.22602
2277.4		0.47205	0.54594	0.2016	0.22561
2278.9		0.49011	0.54866	0.20329	0.23167
2280.3		0.49252	0.54905	0.1978	0.22232
2281.7		0.48887	0.55393	0.2062	0.2307
2283.1		0.49618	0.54748	0.20442	0.22613
2284.6		0.47796	0.55558	0.2059	0.22329
2286		0.47723	0.54557	0.2039	0.23093
2287.4		0.5021	0.57004	0.21217	0.22076
2288.8		0.49002	0.54472	0.19948	0.22707
2290.2		0.47283	0.55624	0.21109	0.23699
2291.7		0.48873	0.55591	0.20409	0.22568
2293.1		0.4881	0.54572	0.20143	0.22701
2294.5		0.48086	0.54068	0.20391	0.2212
2295.9		0.48207	0.55917	0.19948	0.23106
2297.4		0.48934	0.54161	0.21384	0.22609
2298.8		0.49869	0.56439	0.20905	0.22679
2300.2		0.49348	0.5542	0.2006	0.2321
2301.6		0.50483	0.5339	0.20196	0.22566
2303.1		0.48059	0.53734	0.19355	0.23046
2304.5		0.49233	0.55092	0.19912	0.22938
2305.9		0.4879	0.55414	0.20455	0.23588
2307.3		0.47933	0.55745	0.20422	0.22671
2308.8		0.48464	0.56438	0.19291	0.23143
2310.2		0.4894	0.56046	0.20696	0.23106
2311.6		0.48129	0.55709	0.20058	0.22766
2313		0.4746	0.55622	0.20079	0.22961
2314.5		0.4947	0.55566	0.20617	0.22284
2315.9		0.49115	0.54694	0.21105	0.22525
2317.3		0.4948	0.556	0.21094	0.22118
2318.7		0.49392	0.55765	0.20238	0.21705
2320.2		0.4934	0.56206	0.19567	0.22905
2321.6		0.49224	0.54375	0.18968	0.22293
2323		0.4978	0.56118	0.21205	0.22841
2324.4		0.486	0.5618	0.208	0.23197
2325.9		0.48897	0.56044	0.20864	0.24112
2327.3		0.47206	0.55445	0.19859	0.23584
2328.7		0.48713	0.56259	0.20919	0.22669
2330.1		0.48731	0.55239	0.20192	0.2252
2331.6		0.49166	0.55436	0.20918	0.22759
2333		0.48981	0.57096	0.20719	0.22965
2334.4		0.4796	0.55069	0.19997	0.22408
2335.8		0.48586	0.54725	0.2017	0.23075
2337.3		0.48468	0.57176	0.20515	0.22893
2338.7		0.47976	0.56228	0.20948	0.22656
2340.1		0.4894	0.55533	0.20317	0.23529
2341.5		0.49597	0.54116	0.21007	0.22338
2342.9		0.49168	0.54138	0.20214	0.22992
2344.4		0.48753	0.55292	0.20611	0.23722
2345.8		0.47885	0.56299	0.19791	0.22614
2347.2		0.48292	0.55481	0.20652	0.23057
2348.6		0.4938	0.56097	0.20244	0.22806
2350.1		0.47269	0.56077	0.20707	0.23072
2351.5		0.48839	0.56071	0.21232	0.23596
2352.9		0.48963	0.55381	0.19989	0.22064
2354.3		0.47924	0.56689	0.19541	0.225
2355.8		0.48481	0.54656	0.20276	0.2248
2357.2		0.48463	0.55323	0.20487	0.23046
2358.6		0.48974	0.55151	0.19972	0.23291
2360		0.495	0.55859	0.21362	0.23216
2361.5		0.4883	0.55675	0.20438	0.23486
2362.9		0.48313	0.56597	0.21189	0.23069
2364.3		0.47508	0.54912	0.20602	0.23106
2365.7		0.49368	0.54591	0.20378	0.23454
2367.2		0.48466	0.54839	0.21076	0.22687
2368.6		0.49132	0.55387	0.21159	0.22662
2370		0.47749	0.5629	0.20359	0.22788
2371.4		0.48287	0.57045	0.20233	0.21834
2372.9		0.5141	0.53443	0.20572	0.22677
2374.3		0.48849	0.54498	0.20486	0.22631
2375.7		0.49035	0.53531	0.20277	0.23291
2377.1		0.48779	0.54784	0.20264	0.22605
2378.6		0.49013	0.56775	0.19736	0.23275
2380		0.49041	0.55	0.20118	0.23211
2381.4		0.49239	0.55451	0.20275	0.22911
2382.8		0.47097	0.56169	0.20166	0.22669
2384.3		0.46462	0.55393	0.21381	0.22274
2385.7		0.48894	0.54216	0.20612	0.23731
2387.1		0.4989	0.55079	0.20846	0.23148
2388.5		0.48148	0.56244	0.21186	0.23447
2389.9		0.49494	0.55404	0.20239	0.2314
2391.4		0.49523	0.56062	0.204	0.23973
2392.8		0.49875	0.55291	0.20394	0.22987
2394.2		0.48782	0.55249	0.20589	0.23443
2395.6		0.47673	0.56598	0.19816	0.22421
2397.1		0.48413	0.56043	0.21686	0.23494
2398.5		0.46917	0.55846	0.20589	0.2315
2399.9		0.48157	0.55285	0.20198	0.22643
2401.3		0.49025	0.55092	0.19603	0.23184
2402.8		0.48372	0.55823	0.20829	0.2282
2404.2		0.47744	0.54705	0.20923	0.22697
2405.6		0.48461	0.55505	0.20286	0.2308
2407		0.48988	0.55088	0.2022	0.23354
2408.5		0.49364	0.55203	0.21149	0.22978
2409.9		0.4948	0.56739	0.1994	0.23092
2411.3		0.50336	0.5578	0.21119	0.23593
2412.7		0.49828	0.55003	0.20314	0.22986
2414.2		0.48453	0.56361	0.21211	0.22785
2415.6		0.48779	0.54595	0.20407	0.22923
2417		0.4927	0.54483	0.20424	0.22806
2418.4		0.49263	0.55302	0.20715	0.23778
2419.9		0.4826	0.55403	0.20617	0.23071
2421.3		0.50176	0.54983	0.20475	0.23442
2422.7		0.48146	0.54391	0.19853	0.22934
2424.1		0.48667	0.54672	0.20625	0.23366
2425.6		0.48955	0.54623	0.21059	0.23843
2427		0.49269	0.55586	0.20098	0.24126
2428.4		0.48144	0.57318	0.20147	0.23176
2429.8		0.49559	0.55579	0.20723	0.23978
2431.3		0.47276	0.54761	0.20169	0.21403
2432.7		0.49352	0.54093	0.20817	0.23522
2434.1		0.47237	0.55677	0.20136	0.2302
2435.5		0.49182	0.56123	0.2021	0.22938
2437		0.4874	0.56651	0.2	0.22701
2438.4		0.48743	0.55538	0.20813	0.23602
2439.8		0.48836	0.5522	0.20808	0.23059
2441.2		0.49313	0.549	0.20842	0.23263
2442.6		0.49217	0.54894	0.20215	0.23909
2444.1		0.47305	0.54493	0.20063	0.22578
2445.5		0.47987	0.54295	0.19974	0.22875
2446.9		0.4959	0.57064	0.20795	0.23533
2448.3		0.47964	0.55741	0.20647	0.23383
2449.8		0.47858	0.55923	0.20811	0.23114
2451.2		0.48796	0.55722	0.199	0.23754
2452.6		0.49411	0.56058	0.19832	0.22658
2454		0.49816	0.55381	0.21333	0.24184
2455.5		0.47008	0.5683	0.21422	0.22948
2456.9		0.49365	0.56928	0.19535	0.23813
2458.3		0.48961	0.55755	0.20844	0.23411
2459.7		0.49659	0.54355	0.20463	0.23439
2461.2		0.48625	0.54768	0.1985	0.2336
2462.6		0.4923	0.55616	0.20915	0.23423
2464		0.48085	0.54492	0.20366	0.23337
2465.4		0.49052	0.55288	0.21201	0.22396
2466.9		0.49346	0.55262	0.20391	0.22235
2468.3		0.48626	0.56581	0.21005	0.23084
2469.7		0.48898	0.54726	0.21171	0.24304
2471.1		0.49023	0.55924	0.21867	0.22408
2472.6		0.4927	0.54652	0.2038	0.22916
2474		0.50293	0.55643	0.20805	0.23092
2475.4		0.49427	0.54657	0.21292	0.23466
2476.8		0.48608	0.54563	0.20934	0.23553
2478.3		0.49339	0.57108	0.20791	0.23038
2479.7		0.50485	0.54869	0.2052	0.23269
2481.1		0.483	0.55793	0.20122	0.23471
2482.5		0.49902	0.5717	0.20414	0.2305
2484		0.48468	0.55996	0.20185	0.23553
2485.4		0.48358	0.55809	0.21157	0.2252
2486.8		0.48921	0.56043	0.20722	0.23145
2488.2		0.48938	0.54665	0.21733	0.24041
2489.6		0.48414	0.57428	0.20748	0.23088
2491.1		0.47756	0.55705	0.20518	0.23356
2492.5		0.49451	0.5495	0.20873	0.23208
2493.9		0.48313	0.5617	0.20649	0.23736
2495.3		0.48158	0.56805	0.20738	0.23787
2496.8		0.48591	0.55658	0.20688	0.22894
2498.2		0.48603	0.57122	0.19656	0.23194
2499.6		0.50645	0.55793	0.2188	0.22708
2501		0.4945	0.56906	0.2073	0.23843
2502.5		0.4957	0.54982	0.20884	0.23589
2503.9		0.49252	0.55354	0.20289	0.23539
2505.3		0.49771	0.56369	0.20894	0.23993
2506.7		0.49891	0.56823	0.20621	0.22799
2508.2		0.47211	0.57341	0.21285	0.23468
2509.6		0.48851	0.54761	0.20084	0.2309
2511		0.4969	0.55641	0.21305	0.24047
2512.4		0.4933	0.55758	0.18379	0.24236
2513.9		0.4775	0.5672	0.20768	0.24185
2515.3		0.4932	0.54455	0.21526	0.23072
2516.7		0.49519	0.55522	0.19988	0.23716
2518.1		0.48937	0.55996	0.20376	0.22984
2519.6		0.48451	0.56023	0.20522	0.23492
2521		0.49397	0.55207	0.21279	0.2309
2522.4		0.48591	0.54803	0.21064	0.24195
2523.8		0.49554	0.56609	0.2094	0.23602
2525.3		0.51096	0.55248	0.20131	0.23083
2526.7		0.48666	0.54942	0.20482	0.23128
2528.1		0.49133	0.5454	0.20178	0.23145
2529.5		0.49605	0.55971	0.21174	0.23583
2531		0.49379	0.56102	0.19814	0.23317
2532.4		0.48895	0.55708	0.2048	0.23945
2533.8		0.49866	0.56258	0.20198	0.22915
2535.2		0.47795	0.57081	0.20329	0.22362
2536.7		0.49944	0.54765	0.20786	0.23447
2538.1		0.48551	0.56189	0.20882	0.23602
2539.5		0.48494	0.54139	0.21007	0.22916
2540.9		0.4898	0.5551	0.20542	0.23186
2542.3		0.49204	0.5673	0.19997	0.23772
2543.8		0.50027	0.55644	0.20188	0.23176
2545.2		0.48843	0.55943	0.20316	0.23552
2546.6		0.49184	0.56134	0.2272	0.23475
2548		0.48623	0.55726	0.19743	0.24309
2549.5		0.48963	0.57032	0.20859	0.23412
2550.9		0.47776	0.55875	0.20842	0.22816
2552.3		0.48143	0.55949	0.2094	0.23998
2553.7		0.50196	0.56404	0.19899	0.23908
2555.2		0.49647	0.5641	0.20399	0.23109
2556.6		0.49553	0.53919	0.21238	0.23227
2558		0.49154	0.55245	0.21196	0.23258
2559.4		0.4976	0.55178	0.21134	0.24449
2560.9		0.48896	0.5538	0.2097	0.23265
2562.3		0.4948	0.55103	0.21065	0.23058
2563.7		0.5024	0.55082	0.20897	0.22966
2565.1		0.4859	0.57365	0.21279	0.23481
2566.6		0.48377	0.55212	0.20889	0.22216
2568		0.47541	0.56353	0.20623	0.23284
2569.4		0.48871	0.56449	0.2086	0.22939
2570.8		0.48449	0.55995	0.21086	0.23236
2572.3		0.47146	0.54314	0.21193	0.23223
2573.7		0.50029	0.5632	0.2096	0.22473
2575.1		0.48436	0.5627	0.20968	0.23302
2576.5		0.49725	0.54136	0.21061	0.23366
2578		0.50494	0.56333	0.20995	0.23328
2579.4		0.48423	0.56497	0.20868	0.22822
2580.8		0.49673	0.56182	0.2118	0.23357
2582.2		0.49638	0.57906	0.21212	0.23633
2583.7		0.49064	0.55222	0.20729	0.23929
2585.1		0.48792	0.54781	0.20755	0.22678
2586.5		0.50693	0.56996	0.21225	0.23831
2587.9		0.48009	0.54977	0.21533	0.23955
2589.3		0.50095	0.56465	0.2106	0.23185
2590.8		0.50503	0.56499	0.20352	0.23182
2592.2		0.48268	0.56439	0.21482	0.23604
2593.6		0.50106	0.54681	0.2106	0.24388
2595		0.48667	0.55607	0.21321	0.22458
2596.5		0.48344	0.5538	0.21117	0.23284
2597.9		0.49153	0.56882	0.20151	0.24012
2599.3		0.48674	0.55405	0.21528	0.23184
2600.7		0.48044	0.56106	0.21904	0.23312
2602.2		0.49678	0.55931	0.20946	0.22973
2603.6		0.48403	0.56718	0.21546	0.2331
2605		0.48461	0.57362	0.20615	0.23552
2606.4		0.49541	0.5514	0.21047	0.23404
2607.9		0.49056	0.56888	0.2096	0.23238
2609.3		0.49798	0.56337	0.20655	0.23035
2610.7		0.48276	0.55601	0.20605	0.23811
2612.1		0.49554	0.56349	0.21253	0.23449
2613.6		0.49125	0.57162	0.21189	0.22961
2615		0.50406	0.54989	0.21065	0.24087
2616.4		0.48885	0.56355	0.20753	0.23702
2617.8		0.49194	0.55901	0.20977	0.23182
2619.3		0.48393	0.54294	0.21067	0.23388
2620.7		0.49315	0.55756	0.21132	0.228
2622.1		0.49254	0.55834	0.20822	0.24007
2623.5		0.49652	0.53861	0.21431	0.23554
2625		0.49296	0.56523	0.20625	0.23458
2626.4		0.49613	0.54485	0.20362	0.23336
2627.8		0.50042	0.57335	0.20647	0.23377
2629.2		0.48776	0.55103	0.20974	0.23229
2630.7		0.49624	0.55532	0.20615	0.23281
2632.1		0.4828	0.55297	0.20409	0.235
2633.5		0.48595	0.54605	0.2042	0.23823
2634.9		0.49914	0.55925	0.2019	0.23028
2636.4		0.49385	0.56053	0.21116	0.23847
2637.8		0.49	0.57146	0.21263	0.2382
2639.2		0.49294	0.56067	0.21189	0.23599
2640.6		0.49582	0.55484	0.21095	0.23581
2642		0.49565	0.55424	0.21032	0.24566
2643.5		0.48642	0.56548	0.21027	0.23937
2644.9		0.48605	0.54917	0.20112	0.23867
2646.3		0.50212	0.56203	0.2057	0.23654
2647.7		0.49228	0.57134	0.20529	0.22874
2649.2		0.49964	0.56165	0.20326	0.23013
2650.6		0.48786	0.5616	0.20725	0.23847
2652		0.49738	0.56513	0.21696	0.24041
2653.4		0.49267	0.56399	0.21107	0.23708
2654.9		0.49692	0.54377	0.20065	0.23839
2656.3		0.49926	0.5557	0.20782	0.24639
2657.7		0.50966	0.56231	0.22136	0.23525
2659.1		0.49148	0.56492	0.20924	0.23493
2660.6		0.49169	0.56042	0.21746	0.24716
2662		0.49359	0.55951	0.20768	0.23833
2663.4		0.48852	0.5635	0.20425	0.24363
2664.8		0.47958	0.55608	0.2075	0.23701
2666.3		0.47915	0.55108	0.20542	0.23535
2667.7		0.47107	0.55291	0.21325	0.23624
2669.1		0.47929	0.55989	0.21348	0.24054
2670.5		0.48779	0.54655	0.20967	0.22604
2672		0.49237	0.56072	0.21443	0.22045
2673.4		0.4942	0.54864	0.21747	0.23771
2674.8		0.48836	0.55848	0.21543	0.23944
2676.2		0.5031	0.55682	0.20902	0.2427
2677.7		0.49111	0.5677	0.20615	0.23635
2679.1		0.49632	0.55944	0.20816	0.24253
2680.5		0.49503	0.57442	0.21983	0.23677
2681.9		0.49927	0.55709	0.2156	0.23323
2683.4		0.49039	0.55468	0.20497	0.24273
2684.8		0.4911	0.55475	0.20502	0.23325
2686.2		0.48661	0.5647	0.21733	0.23902
2687.6		0.48679	0.56143	0.2187	0.23627
2689		0.49049	0.56161	0.2169	0.23085
2690.5		0.50321	0.556	0.20502	0.23363
2691.9		0.49636	0.56257	0.21041	0.23998
2693.3		0.48512	0.56643	0.20118	0.22644
2694.7		0.49339	0.56435	0.20649	0.23063
2696.2		0.49559	0.56226	0.20952	0.2372
2697.6		0.48199	0.5529	0.20975	0.2306
2699		0.49597	0.56905	0.21434	0.23872
2700.4		0.49299	0.55825	0.2103	0.23316
2701.9		0.49294	0.55158	0.21048	0.24218
2703.3		0.49532	0.54688	0.21304	0.23402
2704.7		0.49141	0.5718	0.21161	0.23548
2706.1		0.49862	0.55167	0.21068	0.23614
2707.6		0.48491	0.55762	0.20639	0.22949
2709		0.4926	0.55954	0.21027	0.24113
2710.4		0.48764	0.55786	0.22431	0.22982
2711.8		0.48623	0.56145	0.2107	0.24365
2713.3		0.49766	0.56385	0.21659	0.23506
2714.7		0.5019	0.55381	0.20711	0.2304
2716.1		0.50636	0.57105	0.21067	0.24413
2717.5		0.48936	0.55309	0.21403	0.23336
2719		0.50122	0.57141	0.20476	0.239
2720.4		0.48617	0.56168	0.21696	0.23937
2721.8		0.50711	0.5559	0.21291	0.23549
2723.2		0.50012	0.56542	0.20777	0.24303
2724.7		0.49585	0.57211	0.21346	0.24136
2726.1		0.49071	0.55467	0.22736	0.23932
2727.5		0.48997	0.56792	0.21012	0.24807
2728.9		0.49251	0.56625	0.21598	0.24083
2730.4		0.48489	0.56355	0.20953	0.23564
2731.8		0.48654	0.55531	0.20803	0.23913
2733.2		0.49129	0.55917	0.21816	0.23543
2734.6		0.48394	0.56153	0.20894	0.23657
2736.1		0.49499	0.58412	0.20373	0.23759
2737.5		0.48746	0.55414	0.21918	0.23153
2738.9		0.49357	0.57108	0.22306	0.24129
2740.3		0.48059	0.56354	0.20707	0.23513
2741.7		0.49023	0.55182	0.21291	0.24329
2743.2		0.49915	0.57476	0.21606	0.23022
2744.6		0.49019	0.55903	0.21835	0.24311
2746		0.4946	0.54937	0.21828	0.24177
2747.4		0.48387	0.56374	0.21167	0.23483
2748.9		0.50203	0.56155	0.22443	0.22492
2750.3		0.50376	0.56507	0.21149	0.24077
2751.7		0.48709	0.57048	0.21338	0.23965
2753.1		0.50037	0.55818	0.21578	0.23474
2754.6		0.48822	0.55414	0.21447	0.24057
2756		0.50036	0.56239	0.2129	0.23647
2757.4		0.49255	0.58146	0.2124	0.23647
2758.8		0.51046	0.56418	0.20938	0.23142
2760.3		0.50193	0.56764	0.21237	0.23946
2761.7		0.49659	0.5589	0.21426	0.2413
2763.1		0.50189	0.5763	0.20829	0.24613
2764.5		0.48368	0.55616	0.21147	0.23642
2766		0.50552	0.55509	0.22213	0.23894
2767.4		0.51456	0.56533	0.20484	0.24276
2768.8		0.50068	0.56702	0.21239	0.24565
2770.2		0.48915	0.56641	0.22202	0.24369
2771.7		0.48873	0.54708	0.21341	0.24961
2773.1		0.49792	0.56336	0.21062	0.24226
2774.5		0.49229	0.54692	0.21335	0.2479
2775.9		0.49435	0.56535	0.20635	0.24557
2777.4		0.50703	0.56561	0.21267	0.23972
2778.8		0.50021	0.55221	0.21312	0.24167
2780.2		0.50213	0.556	0.21414	0.22777
2781.6		0.50178	0.5499	0.20754	0.24282
2783.1		0.51039	0.5703	0.2057	0.23585
2784.5		0.49805	0.56044	0.20743	0.23424
2785.9		0.48909	0.57265	0.20816	0.23632
2787.3		0.49946	0.55512	0.20039	0.23898
2788.7		0.48961	0.55546	0.21221	0.23871
2790.2		0.48896	0.55477	0.22588	0.23515
2791.6		0.4958	0.56259	0.20936	0.23665
2793		0.49197	0.55891	0.20812	0.22902
2794.4		0.48952	0.56899	0.21029	0.24627
2795.9		0.50053	0.56096	0.215	0.2295
2797.3		0.50448	0.55711	0.2164	0.24259
2798.7		0.4958	0.55407	0.20615	0.23793
2800.1		0.5065	0.55204	0.2108	0.24071
2801.6		0.49619	0.56193	0.21149	0.23931
2803		0.51091	0.55684	0.21191	0.238
2804.4		0.50557	0.56332	0.21395	0.23702
2805.8		0.50111	0.55715	0.20783	0.23851
2807.3		0.50281	0.56212	0.21974	0.23521
2808.7		0.49681	0.56319	0.21211	0.24119
2810.1		0.4942	0.57392	0.20712	0.23082
2811.5		0.49941	0.56101	0.21318	0.23666
2813		0.48747	0.56127	0.22027	0.23555
2814.4		0.49383	0.57076	0.21142	0.23454
2815.8		0.49132	0.56409	0.21209	0.23527
2817.2		0.488	0.57409	0.21061	0.23986
2818.7		0.50226	0.56357	0.2065	0.24381
2820.1		0.47982	0.5613	0.22294	0.23482
2821.5		0.51871	0.5708	0.21449	0.23535
2822.9		0.50106	0.56774	0.21498	0.24003
2824.4		0.50036	0.55284	0.20882	0.2412
2825.8		0.48228	0.56227	0.20672	0.25054
2827.2		0.49553	0.56161	0.20929	0.24616
2828.6		0.49515	0.56261	0.21495	0.22635
2830.1		0.49553	0.56516	0.21757	0.23156
2831.5		0.5025	0.55743	0.2143	0.23778
2832.9		0.49277	0.54834	0.21045	0.23965
[truncated: 2,955 more rows]

## Sheet: F5-FS3-B
	Combined Dconfocal (um2s-1)	Standard Error	Percentage error
2 micro Molar (2 hours)	2.0634	0.121554	5.89108
6 micro Molar (2 hours)	2.2136	0.13094	5.91538
2 micro Molar (24 hours)	1.7128	0.0947527	5.532
6 micro Molar (24 hours)	1.6017	0.0880793	5.49902		Quinacine in HeLa
					FRAP: Dose & time dependecy
