# Supplementary material for: Reversing protonation of weakly basic drugs greatly enhances intracellular diffusion and decreases lysosomal sequestration
Source: eLife. 2024 Dec 6;13:RP97255. doi: 10.7554/eLife.97255 (PMC11623935; doi:10.7554/eLife.97255)
Supplement: Figure 5—source data 1. [file elife-97255-fig5-data1.xlsx]

## Sheet: Figure 5A
Time axis (re-adjusted)	Pre-Bleach	PBS	BSA (50mg/mL)	Cytoplasm	Hela extract		Quinarcine inhib normalized FRAP profiles
-12.819	1
-11.394	1.0316
-9.97	1.0462
-8.5457	1.0109
-7.1214	1.0226
-5.6971	1.0342
-4.2729	1.0166
-2.8486	1.0208
-1.4243	1.0797
0		0.30555	0.40152	0.11032	0.17855
1.4243		0.36021	0.41536	0.11633	0.19413
2.8486		0.38875	0.45992	0.128	0.22171
4.2729		0.41956	0.47913	0.13051	0.23329
5.6971		0.43639	0.52348	0.13352	0.24902
7.1214		0.46576	0.53486	0.1381	0.25297
8.5457		0.46972	0.54323	0.15406	0.25973
9.97		0.48611	0.55091	0.15089	0.26492
11.394		0.53846	0.57329	0.16683	0.29234
12.819		0.51028	0.58035	0.17467	0.31
14.243		0.52756	0.60887	0.15641	0.31037
15.667		0.56228	0.57902	0.15706	0.32745
17.091		0.55912	0.61124	0.17415	0.32083
18.516		0.56242	0.61081	0.17713	0.34487
19.94		0.58209	0.6148	0.17272	0.34039
21.364		0.61607	0.64961	0.16539	0.35589
22.789		0.61984	0.63389	0.17386	0.38587
24.213		0.61592	0.63818	0.1886	0.36633
25.637		0.62623	0.67885	0.18585	0.37119
27.061		0.62827	0.67007	0.18393	0.37684
28.486		0.65448	0.64691	0.19186	0.38084
29.91		0.66889	0.66918	0.19074	0.41221
31.334		0.65106	0.67933	0.19424	0.39759
32.759		0.61731	0.68972	0.18638	0.42129
34.183		0.63689	0.69559	0.2044	0.42015
35.607		0.66725	0.70307	0.21044	0.42465
37.031		0.63429	0.67659	0.19633	0.42819
38.456		0.66992	0.69586	0.19747	0.43356
39.88		0.64405	0.69849	0.20929	0.44244
41.304		0.68462	0.70181	0.204	0.45937
42.729		0.69867	0.7065	0.19694	0.44337
44.153		0.66207	0.74508	0.20813	0.4544
45.577		0.67883	0.71394	0.22142	0.46005
47.001		0.70355	0.7081	0.2251	0.45589
48.426		0.69861	0.73845	0.20471	0.47124
49.85		0.68251	0.71254	0.22719	0.48732
51.274		0.68664	0.73776	0.22922	0.47724
52.699		0.73792	0.7617	0.22078	0.48411
54.123		0.72181	0.74447	0.22222	0.50082
55.547		0.70458	0.72432	0.23929	0.4967
56.971		0.70191	0.73456	0.22941	0.4955
58.396		0.7332	0.74544	0.23178	0.51372
59.82		0.7321	0.74109	0.23917	0.51147
61.244		0.7059	0.771	0.22709	0.52641
62.669		0.74475	0.75726	0.22946	0.53103
64.093		0.71303	0.76655	0.24039	0.51154
65.517		0.74515	0.75427	0.2354	0.51145
66.941		0.70919	0.77211	0.24198	0.50811
68.366		0.73509	0.75797	0.24888	0.537
69.79		0.76134	0.78164	0.23943	0.54676
71.214		0.74798	0.77602	0.253	0.52504
72.639		0.76637	0.7738	0.23851	0.53399
74.063		0.75994	0.74831	0.25037	0.53418
75.487		0.7619	0.77764	0.26068	0.53849
76.911		0.75711	0.77392	0.23206	0.55727
78.336		0.74751	0.77701	0.24654	0.56034
79.76		0.76506	0.78735	0.26047	0.56911
81.184		0.76302	0.77881	0.24106	0.56378
82.609		0.77901	0.7866	0.25795	0.56407
84.033		0.77555	0.78489	0.24499	0.56478
85.457		0.77691	0.77646	0.25447	0.56571
86.881		0.78993	0.78344	0.26169	0.59681
88.306		0.77786	0.81055	0.26571	0.59785
89.73		0.76819	0.77166	0.26627	0.57835
91.154		0.77789	0.78884	0.26561	0.57385
92.579		0.80159	0.80635	0.26965	0.58907
94.003		0.80213	0.75986	0.28271	0.58855
95.427		0.79677	0.78706	0.27667	0.58925
96.851		0.77218	0.79776	0.2816	0.59132
98.276		0.81759	0.82498	0.28373	0.60421
99.7		0.81057	0.80458	0.26903	0.61123
101.12		0.79464	0.81164	0.27623	0.60138
102.55		0.80423	0.83081	0.28638	0.59372
103.97		0.8046	0.79453	0.27858	0.59526
105.4		0.83498	0.79865	0.28497	0.58454
106.82		0.82543	0.80942	0.29426	0.61239
108.25		0.80205	0.8286	0.29027	0.61685
109.67		0.81128	0.82481	0.29443	0.61974
111.09		0.79121	0.8085	0.28941	0.6029
112.52		0.84215	0.84796	0.29642	0.62493
113.94		0.80837	0.81616	0.29591	0.63607
115.37		0.79464	0.80566	0.29051	0.61965
116.79		0.79102	0.85713	0.29813	0.614
118.22		0.80426	0.84551	0.30387	0.62311
119.64		0.81305	0.80082	0.29569	0.6317
121.06		0.81887	0.82371	0.29877	0.64068
122.49		0.8061	0.84299	0.30809	0.62746
123.91		0.79585	0.79815	0.29522	0.63794
125.34		0.83403	0.7948	0.29275	0.63765
126.76		0.81492	0.83221	0.29022	0.66322
128.19		0.80945	0.81648	0.29817	0.63781
129.61		0.84676	0.82234	0.30232	0.63481
131.03		0.83759	0.85529	0.30839	0.65761
132.46		0.83427	0.82067	0.30725	0.63056
133.88		0.82123	0.82082	0.30357	0.66825
135.31		0.83964	0.8278	0.30089	0.64531
136.73		0.84018	0.83265	0.31809	0.6494
138.16		0.81904	0.83934	0.31649	0.65823
139.58		0.82076	0.85519	0.31321	0.64894
141		0.80368	0.83701	0.32033	0.65684
142.43		0.81134	0.81059	0.31233	0.66482
143.85		0.82457	0.85756	0.31833	0.67304
145.28		0.832	0.81009	0.3212	0.66149
146.7		0.82514	0.86465	0.325	0.63351
148.13		0.82364	0.85645	0.32243	0.6721
149.55		0.81602	0.82835	0.31421	0.64816
150.97		0.83676	0.8377	0.31376	0.65997
152.4		0.83199	0.86359	0.32151	0.6835
153.82		0.81444	0.86934	0.31663	0.67844
155.25		0.856	0.85182	0.31319	0.67667
156.67		0.8441	0.86187	0.31834	0.69493
158.1		0.8637	0.82682	0.32671	0.69442
159.52		0.83923	0.8408	0.32235	0.70877
160.94		0.8462	0.86161	0.32133	0.69039
162.37		0.85516	0.85398	0.32959	0.68327
163.79		0.81877	0.8452	0.3328	0.66896
165.22		0.8529	0.85501	0.33267	0.68606
166.64		0.85485	0.86495	0.33637	0.6658
168.07		0.85221	0.84271	0.33476	0.67696
169.49		0.88277	0.86996	0.32546	0.68739
170.91		0.81725	0.84964	0.3366	0.69471
172.34		0.86011	0.83343	0.32883	0.70141
173.76		0.85105	0.83388	0.33637	0.69969
175.19		0.85291	0.86132	0.33474	0.68989
176.61		0.87638	0.8605	0.33594	0.71488
178.04		0.87501	0.83508	0.34347	0.69532
179.46		0.85605	0.86355	0.33343	0.69733
180.88		0.85121	0.86336	0.35106	0.6887
182.31		0.8866	0.8532	0.34279	0.67485
183.73		0.84852	0.86697	0.34722	0.70607
185.16		0.8894	0.83985	0.34886	0.70754
186.58		0.86226	0.83883	0.36292	0.69787
188.01		0.85228	0.87751	0.34105	0.69153
189.43		0.83076	0.87435	0.35249	0.72189
190.85		0.86447	0.85075	0.34099	0.74121
192.28		0.8555	0.87487	0.35872	0.71622
193.7		0.87507	0.83703	0.35158	0.70208
195.13		0.8672	0.88031	0.35101	0.71486
196.55		0.84953	0.85994	0.35079	0.71948
197.98		0.86571	0.83434	0.35979	0.7211
199.4		0.87829	0.84538	0.36452	0.72514
200.82		0.86342	0.88484	0.35869	0.71503
202.25		0.84744	0.85003	0.33927	0.71296
203.67		0.85347	0.85282	0.34974	0.73073
205.1		0.85094	0.85789	0.36019	0.71489
206.52		0.88226	0.8637	0.35985	0.71626
207.95		0.86407	0.86159	0.34881	0.72787
209.37		0.87377	0.85373	0.36275	0.714
210.79		0.89812	0.87521	0.37678	0.70859
212.22		0.86411	0.86128	0.35517	0.70493
213.64		0.89569	0.86622	0.36053	0.71861
215.07		0.85981	0.86536	0.36026	0.72866
216.49		0.88013	0.872	0.36801	0.73433
217.92		0.86884	0.88542	0.37111	0.74264
219.34		0.88042	0.87115	0.36553	0.73471
220.76		0.90395	0.86775	0.38132	0.73533
222.19		0.89373	0.88093	0.38631	0.72386
223.61		0.86136	0.89437	0.36502	0.73855
225.04		0.87301	0.88727	0.37396	0.73863
226.46		0.83699	0.86796	0.38668	0.72789
227.89		0.8638	0.85941	0.37244	0.7164
229.31		0.8899	0.87721	0.38766	0.73891
230.73		0.8732	0.89433	0.38202	0.73911
232.16		0.89721	0.86781	0.37555	0.73562
233.58		0.86225	0.87915	0.38413	0.73487
235.01		0.88858	0.87331	0.37262	0.75165
236.43		0.84724	0.891	0.38641	0.738
237.86		0.86195	0.88544	0.38332	0.74352
239.28		0.90511	0.87326	0.37734	0.74201
240.7		0.88712	0.88329	0.38423	0.76935
242.13		0.84618	0.88054	0.38287	0.74937
243.55		0.86897	0.85522	0.37162	0.74657
244.98		0.89823	0.90238	0.39944	0.743
246.4		0.88753	0.87999	0.3753	0.73104
247.83		0.87091	0.85412	0.38543	0.75643
249.25		0.88771	0.84418	0.40927	0.73705
250.67		0.89276	0.87369	0.38882	0.73352
252.1		0.89009	0.90943	0.38519	0.74549
253.52		0.88561	0.87678	0.40829	0.73657
254.95		0.88574	0.87585	0.39243	0.74335
256.37		0.87244	0.8711	0.39209	0.7345
257.8		0.8645	0.87192	0.37777	0.75061
259.22		0.87032	0.88088	0.39132	0.74932
260.64		0.88126	0.87693	0.38805	0.75439
262.07		0.8972	0.88094	0.39733	0.77504
263.49		0.85397	0.88977	0.38943	0.75645
264.92		0.92912	0.90116	0.3976	0.7404
266.34		0.87321	0.87728	0.39446	0.76484
267.77		0.88822	0.85945	0.39189	0.73883
269.19		0.87015	0.8541	0.39263	0.76853
270.61		0.87809	0.90353	0.41398	0.74388
272.04		0.88412	0.8658	0.37869	0.74365
273.46		0.88789	0.88337	0.39138	0.76181
274.89		0.90167	0.90509	0.39468	0.76529
276.31		0.90163	0.88502	0.38879	0.77641
277.74		0.86833	0.89639	0.40569	0.75322
279.16		0.87673	0.89729	0.4052	0.77234
280.58		0.88893	0.86493	0.41231	0.7812
282.01		0.88787	0.9092	0.39876	0.76722
283.43		0.872	0.90803	0.39865	0.75815
284.86		0.90383	0.90167	0.40131	0.7685
286.28		0.85593	0.89197	0.41459	0.76938
287.71		0.87955	0.89699	0.40034	0.75716
289.13		0.87043	0.89924	0.40066	0.75988
290.55		0.88665	0.8767	0.4079	0.76367
291.98		0.89377	0.90751	0.38608	0.76006
293.4		0.90513	0.89835	0.41318	0.75119
294.83		0.92721	0.89482	0.39745	0.75295
296.25		0.88747	0.86931	0.41821	0.75993
297.68		0.899	0.91286	0.42211	0.7996
299.1		0.89378	0.89892	0.41271	0.76767
300.52		0.91628	0.89669	0.42723	0.78085
301.95		0.90432	0.87876	0.42349	0.77907
303.37		0.90351	0.89876	0.41034	0.75689
304.8		0.91297	0.86354	0.4065	0.77213
306.22		0.91729	0.91053	0.42109	0.79291
307.65		0.89458	0.87481	0.41435	0.75577
309.07		0.89215	0.89654	0.41684	0.76233
310.49		0.87708	0.88802	0.39506	0.77926
311.92		0.89214	0.90225	0.42083	0.78409
313.34		0.88915	0.89536	0.42369	0.77654
314.77		0.88565	0.88971	0.4224	0.78624
316.19		0.90491	0.87654	0.41973	0.7913
317.62		0.92717	0.89531	0.41852	0.77376
319.04		0.9326	0.88319	0.41069	0.794
320.46		0.90022	0.90397	0.42864	0.76904
321.89		0.90625	0.88438	0.4443	0.79018
323.31		0.89573	0.90774	0.43348	0.78345
324.74		0.89565	0.9302	0.4192	0.77738
326.16		0.92482	0.91132	0.42575	0.79302
327.59		0.89213	0.9046	0.42825	0.79801
329.01		0.91145	0.87484	0.43671	0.77878
330.43		0.91086	0.87752	0.42931	0.76345
331.86		0.89424	0.91113	0.4252	0.78146
333.28		0.91298	0.88681	0.43219	0.77727
334.71		0.91857	0.90414	0.41866	0.80667
336.13		0.90261	0.85092	0.44177	0.79971
337.56		0.91518	0.90161	0.43167	0.76909
338.98		0.91846	0.87994	0.43135	0.79832
340.4		0.90188	0.89502	0.42719	0.76763
341.83		0.90254	0.89183	0.42758	0.80985
343.25		0.87583	0.88873	0.43188	0.81103
344.68		0.90545	0.90111	0.42824	0.8178
346.1		0.93047	0.8932	0.4407	0.79489
347.53		0.94252	0.91367	0.43342	0.78901
348.95		0.89837	0.91015	0.43422	0.78789
350.37		0.9366	0.90233	0.41944	0.78718
351.8		0.90775	0.90399	0.45047	0.80043
353.22		0.88412	0.89049	0.4174	0.78414
354.65		0.94008	0.91671	0.42693	0.79759
356.07		0.88915	0.89551	0.43747	0.79033
357.5		0.90828	0.90744	0.43848	0.79669
358.92		0.93014	0.89115	0.43058	0.79277
360.34		0.91615	0.90789	0.42669	0.80057
361.77		0.91702	0.91578	0.43916	0.78356
363.19		0.89866	0.91039	0.42733	0.81172
364.62		0.9159	0.90118	0.45154	0.8095
366.04		0.92614	0.89037	0.44716	0.7947
367.47		0.91365	0.9382	0.43298	0.79603
368.89		0.90626	0.91943	0.434	0.80234
370.31		0.91904	0.90686	0.44509	0.78254
371.74		0.93888	0.89206	0.44829	0.78767
373.16		0.92748	0.91402	0.43173	0.81354
374.59		0.88292	0.91974	0.45421	0.80187
376.01		0.92231	0.92229	0.44338	0.82039
377.44		0.93818	0.91549	0.43025	0.80477
378.86		0.8883	0.90684	0.45027	0.79128
380.28		0.92375	0.88078	0.44512	0.79698
381.71		0.91281	0.92586	0.44943	0.79866
383.13		0.92066	0.91719	0.46023	0.80927
384.56		0.92254	0.90923	0.46083	0.8058
385.98		0.91681	0.93219	0.44564	0.81066
387.41		0.92035	0.90808	0.45904	0.79313
388.83		0.92494	0.94096	0.44919	0.82505
390.25		0.9256	0.89724	0.45302	0.78874
391.68		0.93224	0.89761	0.46638	0.80802
393.1		0.90539	0.89326	0.45876	0.80553
394.53		0.90753	0.90556	0.46337	0.82049
395.95		0.93668	0.90671	0.45254	0.79469
397.38		0.90804	0.92091	0.45124	0.80014
398.8		0.90537	0.90719	0.46083	0.81564
400.22		0.91252	0.90672	0.45395	0.81326
401.65		0.88954	0.92985	0.45149	0.8045
403.07		0.93603	0.92381	0.44297	0.82082
404.5		0.91736	0.88702	0.45147	0.79443
405.92		0.93241	0.91339	0.49538	0.80792
407.35		0.8951	0.89759	0.45816	0.82423
408.77		0.91998	0.92111	0.45546	0.8068
410.19		0.93835	0.89493	0.45559	0.81961
411.62		0.93237	0.91772	0.45807	0.81271
413.04		0.93611	0.92164	0.46002	0.80743
414.47		0.93455	0.90583	0.45966	0.81072
415.89		0.92556	0.90759	0.48078	0.81693
417.32		0.93965	0.92862	0.45894	0.825
418.74		0.9219	0.92044	0.46166	0.80146
420.16		0.89088	0.89568	0.45605	0.81261
421.59		0.92467	0.9398	0.46521	0.80285
423.01		0.926	0.9065	0.4663	0.82363
424.44		0.90128	0.8983	0.45188	0.81284
425.86		0.92427	0.89397	0.4606	0.81375
427.29		0.89834	0.89512	0.47177	0.83621
428.71		0.92935	0.91934	0.46308	0.80743
430.13		0.90883	0.92413	0.46462	0.80424
431.56		0.92236	0.91353	0.47443	0.81754
432.98		0.90259	0.87939	0.46395	0.78982
434.41		0.92969	0.88514	0.46566	0.8362
435.83		0.89634	0.91106	0.46746	0.8199
437.26		0.91087	0.91981	0.46238	0.83652
438.68		0.91615	0.89576	0.45634	0.83466
440.1		0.93204	0.91998	0.47333	0.8305
441.53		0.92518	0.90571	0.47797	0.82325
442.95		0.91029	0.91455	0.47101	0.84995
444.38		0.93385	0.91795	0.48	0.81618
445.8		0.92473	0.91334	0.46393	0.82508
447.23		0.93799	0.89311	0.46125	0.82661
448.65		0.93459	0.92624	0.46383	0.82321
450.07		0.97481	0.93448	0.46045	0.81086
451.5		0.92209	0.92907	0.47723	0.81288
452.92		0.92907	0.91171	0.47391	0.82778
454.35		0.92326	0.90778	0.4616	0.82935
455.77		0.91376	0.92668	0.47469	0.84329
457.2		0.91502	0.91556	0.48077	0.81513
458.62		0.94516	0.94254	0.48125	0.82294
460.04		0.93292	0.90216	0.46168	0.81097
461.47		0.9441	0.90371	0.46378	0.84512
462.89		0.93792	0.90387	0.47836	0.83351
464.32		0.91719	0.93572	0.46432	0.84397
465.74		0.90397	0.89959	0.47876	0.82406
467.17		0.92888	0.9249	0.46942	0.80831
468.59		0.92795	0.90564	0.46537	0.82075
470.01		0.95061	0.90445	0.462	0.8263
471.44		0.93704	0.91222	0.46468	0.84437
472.86		0.9153	0.88464	0.47715	0.83939
474.29		0.92541	0.89681	0.48225	0.84053
475.71		0.90974	0.91314	0.48777	0.8494
477.14		0.91617	0.89941	0.47849	0.83971
478.56		0.89916	0.90033	0.4887	0.83386
479.98		0.93927	0.90448	0.47689	0.83738
481.41		0.91476	0.90846	0.47241	0.84238
482.83		0.95719	0.93082	0.48019	0.84498
484.26		0.93632	0.92463	0.46355	0.83823
485.68		0.94406	0.90886	0.50129	0.84168
487.11		0.93102	0.92237	0.48256	0.85581
488.53		0.92504	0.91328	0.48672	0.84005
489.95		0.9284	0.94448	0.49355	0.85448
491.38		0.93902	0.91656	0.47893	0.82749
492.8		0.93518	0.89678	0.48358	0.8445
494.23		0.92917	0.92188	0.4719	0.82672
495.65		0.92782	0.92256	0.49349	0.86168
497.08		0.93846	0.89929	0.48564	0.83206
498.5		0.92366	0.92545	0.49006	0.84186
499.92		0.93543	0.91591	0.48403	0.84136
501.35		0.94696	0.9044	0.48326	0.85187
502.77		0.94559	0.94216	0.48352	0.86372
504.2		0.9232	0.94552	0.49034	0.8559
505.62		0.91546	0.9009	0.49735	0.83482
507.05		0.92409	0.91601	0.48637	0.84735
508.47		0.95478	0.90961	0.4856	0.84945
509.89		0.93243	0.95748	0.49404	0.87092
511.32		0.94623	0.92339	0.46565	0.82286
512.74		0.92358	0.93132	0.48633	0.84686
514.17		0.92963	0.93478	0.4912	0.84378
515.59		0.93361	0.90789	0.48616	0.85789
517.02		0.9413	0.9324	0.4761	0.85059
518.44		0.9223	0.93244	0.47952	0.85022
519.86		0.9223	0.92269	0.49515	0.83216
521.29		0.9388	0.92758	0.49936	0.82465
522.71		0.93701	0.93677	0.48456	0.84609
524.14		0.91985	0.92327	0.4813	0.84041
525.56		0.9041	0.9273	0.49737	0.83599
526.99		0.94811	0.93531	0.4914	0.83329
528.41		0.94377	0.92032	0.49726	0.84461
529.83		0.93872	0.91617	0.49783	0.85644
531.26		0.93456	0.901	0.50369	0.85006
532.68		0.93291	0.94356	0.51494	0.83376
534.11		0.92633	0.91972	0.49232	0.88037
535.53		0.92275	0.92282	0.48867	0.85682
536.96		0.93114	0.8986	0.4898	0.82186
538.38		0.92492	0.92342	0.49067	0.86146
539.8		0.91416	0.93903	0.48507	0.82676
541.23		0.93678	0.91062	0.50719	0.86361
542.65		0.93685	0.9236	0.50258	0.86474
544.08		0.937	0.90681	0.49791	0.84234
545.5		0.93036	0.91561	0.50475	0.82985
546.93		0.95528	0.95873	0.49332	0.8717
548.35		0.91373	0.91572	0.50508	0.84481
549.77		0.9683	0.91543	0.50118	0.85141
551.2		0.95318	0.92158	0.51116	0.86174
552.62		0.9146	0.94474	0.50059	0.85155
554.05		0.93128	0.92796	0.51163	0.8377
555.47		0.90356	0.93377	0.50839	0.84256
556.9		0.93859	0.91221	0.50698	0.86611
558.32		0.92261	0.93408	0.49033	0.85336
559.74		0.94163	0.93909	0.50448	0.87096
561.17		0.97139	0.94142	0.49238	0.85863
562.59		0.93943	0.94278	0.50041	0.85286
564.02		0.94802	0.93736	0.50889	0.85513
565.44		0.92251	0.92743	0.49725	0.86128
566.87		0.94447	0.92811	0.49033	0.85688
568.29		0.96025	0.95565	0.49655	0.84779
569.71		0.92901	0.94169	0.49864	0.86236
571.14		0.92115	0.92178	0.51579	0.85037
572.56		0.93498	0.91484	0.5058	0.85339
573.99		0.93743	0.94183	0.50411	0.85245
575.41		0.91769	0.92729	0.49088	0.84807
576.84		0.9448	0.93751	0.49936	0.87643
578.26		0.9475	0.93312	0.49428	0.86545
579.68		0.92803	0.91474	0.50839	0.85632
581.11		0.93229	0.91982	0.49925	0.84005
582.53		0.90534	0.90593	0.49484	0.86517
583.96		0.93659	0.93901	0.51035	0.85003
585.38		0.92105	0.91814	0.50828	0.85408
586.81		0.94566	0.92408	0.51747	0.87279
588.23		0.92555	0.91376	0.50325	0.848
589.65		0.94381	0.93595	0.50103	0.87936
591.08		0.93524	0.90363	0.52167	0.83748
592.5		0.914	0.95983	0.50655	0.87712
593.93		0.95137	0.93934	0.51106	0.85592
595.35		0.93451	0.93601	0.50821	0.86647
596.78		0.933	0.93398	0.50269	0.84937
598.2		0.95186	0.9449	0.50327	0.86439
599.62		0.92564	0.9203	0.51441	0.84272
601.05		0.96768	0.94671	0.51474	0.85902
602.47		0.93176	0.94146	0.50621	0.8544
603.9		0.93134	0.93566	0.50245	0.85596
605.32		0.92892	0.93319	0.50373	0.87863
606.75		0.93175	0.94708	0.51981	0.8593
608.17		0.93094	0.94926	0.52891	0.83623
609.59		0.92782	0.93576	0.50718	0.87321
611.02		0.95504	0.92065	0.50503	0.84214
612.44		0.93794	0.94388	0.51366	0.84983
613.87		0.95172	0.9355	0.51637	0.85061
615.29		0.96118	0.92344	0.5216	0.87407
616.72		0.93142	0.91579	0.51229	0.85249
618.14		0.9252	0.95528	0.52685	0.84312
619.56		0.9331	0.93333	0.50832	0.85003
620.99		0.96923	0.91551	0.51002	0.86703
622.41		0.96005	0.92691	0.50313	0.86991
623.84		0.96475	0.92859	0.50906	0.85906
625.26		0.92133	0.92851	0.51615	0.82639
626.69		0.949	0.91688	0.51669	0.8548
628.11		0.96486	0.90323	0.51698	0.88009
629.53		0.92402	0.89997	0.5108	0.87674
630.96		0.95436	0.92889	0.5192	0.88928
632.38		0.92581	0.91383	0.51831	0.87425
633.81		0.94629	0.92825	0.5319	0.84706
635.23		0.94368	0.91622	0.51049	0.85995
636.66		0.9607	0.93398	0.51778	0.88168
638.08		0.92193	0.93645	0.52503	0.86587
639.5		0.93422	0.93495	0.52444	0.85358
640.93		0.96124	0.9503	0.53281	0.84862
642.35		0.94861	0.93644	0.50792	0.85679
643.78		0.94291	0.93985	0.51142	0.84479
645.2		0.94034	0.92082	0.52186	0.87124
646.63		0.95064	0.94826	0.50167	0.86601
648.05		0.93855	0.94102	0.50752	0.85527
649.47		0.91501	0.93125	0.5315	0.86162
650.9		0.95325	0.92269	0.52302	0.85436
652.32		0.93262	0.92728	0.53541	0.85105
653.75		0.99151	0.93514	0.51723	0.83868
655.17		0.95451	0.95073	0.52688	0.85819
656.6		0.93383	0.92382	0.52144	0.87997
658.02		0.95826	0.93835	0.52598	0.88517
659.44		0.95301	0.93422	0.5203	0.87323
660.87		0.95245	0.91507	0.51268	0.88838
662.29		0.96152	0.93299	0.52508	0.86054
663.72		0.92976	0.9339	0.53069	0.87261
665.14		0.96341	0.94367	0.52364	0.86722
666.57		0.93277	0.92859	0.52925	0.84339
667.99		0.9419	0.93447	0.53067	0.86841
669.41		0.92917	0.94047	0.53457	0.87422
670.84		0.95679	0.94635	0.52491	0.87259
672.26		0.93546	0.92587	0.53353	0.87786
673.69		0.93186	0.92221	0.51384	0.84191
675.11		0.93186	0.95298	0.52642	0.8842
676.54		0.94728	0.93219	0.53469	0.86952
677.96		0.90984	0.90711	0.53269	0.86312
679.38		0.95843	0.9218	0.53541	0.87443
680.81		0.92878	0.91733	0.52316	0.86998
682.23		0.96049	0.96014	0.50444	0.86992
683.66		0.95788	0.94812	0.52204	0.85671
685.08		0.94838	0.92375	0.51517	0.87881
686.51		0.97698	0.94208	0.51256	0.88089
687.93		0.94961	0.93332	0.53958	0.86593
689.35		0.94648	0.93757	0.54114	0.8799
690.78		0.95237	0.90605	0.53941	0.87013
692.2		0.96148	0.91659	0.51836	0.85026
693.63		0.96564	0.94332	0.54272	0.8434
695.05		0.95703	0.93807	0.52973	0.87336
696.48		0.92187	0.93439	0.52438	0.87155
697.9		0.9509	0.96548	0.52764	0.88692
699.32		0.96254	0.96909	0.52744	0.88684
700.75		0.94984	0.95047	0.53275	0.86063
702.17		0.97521	0.93298	0.52926	0.87525
703.6		0.94766	0.95083	0.545	0.88183
705.02		0.92417	0.9336	0.54016	0.868
706.45		0.934	0.94281	0.54362	0.86934
707.87		0.92925	0.91543	0.52566	0.85474
709.29		0.93977	0.92901	0.52472	0.86235
710.72		0.95252	0.92159	0.55608	0.89022
712.14		0.94936	0.93512	0.54047	0.88667
713.57		0.96726	0.95926	0.55535	0.88111
714.99		0.95588	0.9149	0.5457	0.88649
716.42		0.98631	0.92155	0.54299	0.89512
717.84		0.95307	0.98459	0.54324	0.89808
719.26		0.971	0.94524	0.52353	0.88336
720.69		0.95388	0.92399	0.52841	0.86832
722.11		0.91073	0.92813	0.53322	0.87283
723.54		0.94508	0.93901	0.53066	0.88439
724.96		0.95295	0.90223	0.52924	0.90242
726.39		0.95731	0.94376	0.53766	0.90226
727.81		0.952	0.93935	0.5371	0.85727
729.23		0.92792	0.93539	0.52952	0.89637
730.66		0.93636	0.96415	0.5304	0.87317
732.08		0.95191	0.95408	0.53772	0.89326
733.51		0.9684	0.93429	0.54052	0.9021
734.93		0.93496	0.96015	0.52492	0.86753
736.36		0.94355	0.9518	0.53933	0.86903
737.78		0.94832	0.93957	0.53042	0.8996
739.2		0.92648	0.948	0.52667	0.89461
740.63		0.94708	0.95948	0.54579	0.88266
742.05		0.96264	0.93631	0.54182	0.87132
743.48		0.93623	0.943	0.54939	0.89225
744.9		0.95704	0.90752	0.55818	0.89119
746.33		0.95904	0.93684	0.54168	0.90226
747.75		0.94358	0.94455	0.56434	0.88621
749.17		0.93793	0.94603	0.53454	0.88499
750.6		0.9567	0.93563	0.54309	0.88682
752.02		0.97549	0.96457	0.56637	0.89111
753.45		0.96894	0.94823	0.54402	0.87473
754.87		0.90877	0.9507	0.5327	0.8788
756.3		0.94122	0.95982	0.54571	0.89733
757.72		0.94171	0.93704	0.53931	0.876
759.14		0.94382	0.93651	0.54491	0.89512
760.57		0.96578	0.94238	0.5421	0.88448
761.99		0.96427	0.92996	0.55762	0.88144
763.42		0.96084	0.95487	0.54169	0.89946
764.84		0.93683	0.94714	0.55155	0.92545
766.27		0.93349	0.94205	0.57278	0.90606
767.69		0.94008	0.93293	0.53676	0.86914
769.11		0.93937	0.90733	0.54268	0.87218
770.54		0.94818	0.95742	0.53604	0.87226
771.96		0.93708	0.94448	0.52936	0.8899
773.39		0.94785	0.94443	0.55095	0.88842
774.81		0.9755	0.93508	0.53062	0.89372
776.24		0.9479	0.90002	0.55086	0.8743
777.66		0.96625	0.92275	0.5549	0.91616
779.08		0.96301	0.92837	0.55396	0.87634
780.51		0.94462	0.93226	0.53348	0.87334
781.93		0.95169	0.92488	0.54489	0.86559
783.36		0.97793	0.9151	0.56075	0.8918
784.78		0.93916	0.97167	0.54816	0.86915
786.21		0.96657	0.93413	0.53898	0.88557
787.63		0.9458	0.94832	0.53117	0.86277
789.05		0.9524	0.95321	0.558	0.86998
790.48		0.94191	0.93317	0.54404	0.88782
791.9		0.94666	0.93443	0.55115	0.89923
793.33		0.97793	0.95535	0.55081	0.87883
794.75		0.94972	0.92511	0.54461	0.89075
796.18		0.93881	0.939	0.54436	0.87059
797.6		0.92106	0.96298	0.5436	0.86315
799.02		0.9815	0.93933	0.54797	0.89101
800.45		0.95339	0.96323	0.55963	0.89163
801.87		0.9548	0.92924	0.54655	0.88423
803.3		0.95636	0.93995	0.55844	0.89612
804.72		0.95725	0.94924	0.52544	0.88369
806.15		0.92783	0.97352	0.55879	0.90341
807.57		0.98714	0.93568	0.56845	0.87696
808.99		0.95563	0.9602	0.55254	0.89106
810.42		0.94434	0.94687	0.54406	0.88276
811.84		0.97218	0.94577	0.54284	0.87618
813.27		0.97551	0.95633	0.55623	0.87492
814.69		0.96842	0.9587	0.55215	0.8972
816.12		0.95774	0.94476	0.54555	0.87535
817.54		0.95818	0.94174	0.53475	0.89783
818.96		0.96375	0.97625	0.55779	0.87935
820.39		0.95356	0.94738	0.54375	0.89562
821.81		0.93182	0.91803	0.54384	0.89816
823.24		0.96722	0.93796	0.55645	0.87241
824.66		0.93338	0.92943	0.56583	0.90862
826.09		0.95735	0.95239	0.56991	0.89546
827.51		0.951	0.94805	0.53921	0.89816
828.93		0.97874	0.94747	0.55907	0.89509
830.36		0.96701	0.92619	0.55181	0.88861
831.78		0.95721	0.92012	0.56146	0.90639
833.21		0.95456	0.92936	0.54806	0.88854
834.63		0.94171	0.93834	0.559	0.8933
836.06		0.99271	0.91569	0.56066	0.90278
837.48		0.93582	0.93546	0.54245	0.89199
838.9		0.939	0.94219	0.53887	0.89747
840.33		0.9587	0.89907	0.55129	0.90715
841.75		0.98539	0.95565	0.55295	0.90686
843.18		0.93722	0.95086	0.56659	0.92732
844.6		0.95492	0.92602	0.55286	0.90371
846.03		0.99404	0.90584	0.57524	0.89315
847.45		0.95478	0.95408	0.55381	0.91993
848.87		0.94392	0.9529	0.56712	0.92489
850.3		0.96421	0.95251	0.56491	0.89966
851.72		0.97811	0.91689	0.55565	0.91441
853.15		0.98264	0.9257	0.56993	0.89438
854.57		0.98648	0.92775	0.55727	0.8882
856		0.95706	0.95913	0.55064	0.91168
857.42		0.94345	0.92726	0.55918	0.91341
858.84		0.98404	0.97651	0.56079	0.90536
860.27		0.9662	0.9129	0.55308	0.86646
861.69		0.96707	0.96443	0.56043	0.89107
863.12		0.93664	0.92975	0.5403	0.9178
864.54		0.95677	0.95425	0.5689	0.88534
865.97		0.97351	0.93099	0.5663	0.89235
867.39		0.95043	0.97194	0.55009	0.88121
868.81		0.98761	0.97067	0.56006	0.89768
870.24		0.94701	0.92191	0.55623	0.88787
871.66		0.92366	0.94923	0.56062	0.89016
873.09		0.9704	0.94077	0.55525	0.91245
874.51		0.94481	0.92044	0.55422	0.90049
875.94		0.94318	0.93536	0.55695	0.89827
877.36		1.0048	0.93996	0.56321	0.88636
878.78		0.97744	0.95985	0.57014	0.90971
880.21		0.96368	0.91584	0.57224	0.88089
881.63		0.98176	0.96182	0.56015	0.8833
883.06		0.96547	0.95927	0.58394	0.88015
884.48		0.97117	0.97058	0.56121	0.91984
885.91		0.97906	0.92535	0.57088	0.89575
887.33		0.94206	0.944	0.58312	0.89775
888.75		0.95162	0.96271	0.55245	0.88619
890.18		0.92971	0.94023	0.57446	0.89941
891.6		0.99382	0.95043	0.55907	0.92278
893.03		0.96035	0.95933	0.55217	0.90661
894.45		0.96316	0.94003	0.55994	0.93085
895.88		0.92554	0.91729	0.56449	0.89784
897.3		0.9547	0.95181	0.55279	0.89606
898.72		0.93501	0.96122	0.55349	0.89077
900.15		0.96842	0.9438	0.5614	0.90669
901.57		0.95184	0.93676	0.56496	0.89259
903		0.95873	0.92076	0.554	0.89927
904.42		0.99355	0.96119	0.56348	0.90674
905.85		0.95056	0.96606	0.56322	0.8827
907.27		0.95734	0.92949	0.56138	0.87203
908.69		0.95672	0.94672	0.54965	0.88554
910.12		0.95615	0.94558	0.56375	0.90562
911.54		0.97684	0.91842	0.56661	0.91507
912.97		0.94371	0.92289	0.55821	0.90488
914.39		0.9542	0.98117	0.56706	0.92165
915.82		0.94655	0.95738	0.56949	0.89419
917.24		0.94942	0.96466	0.59073	0.89078
918.66		0.95016	0.94187	0.57879	0.88801
920.09		0.93889	0.95807	0.55651	0.92855
921.51		0.93745	0.95632	0.57192	0.91143
922.94		0.95016	0.95326	0.55964	0.90296
924.36		0.97991	0.92401	0.5646	0.91983
925.79		0.95637	0.94286	0.56972	0.90436
927.21		0.98552	0.93932	0.57628	0.89814
928.63		0.9391	0.97138	0.56717	0.91154
930.06		0.94875	0.96187	0.57917	0.88509
931.48		0.9603	0.92292	0.56193	0.91965
932.91		0.95646	0.96243	0.57366	0.91319
934.33		0.96273	0.94572	0.58102	0.89779
935.76		0.95745	0.96751	0.54843	0.91512
937.18		0.98403	0.93615	0.58382	0.90696
938.6		0.92911	0.92255	0.56411	0.9234
940.03		0.95245	0.9434	0.57147	0.91383
941.45		0.95119	0.94114	0.56777	0.90833
942.88		0.95194	0.95329	0.54669	0.89768
944.3		0.94689	0.94482	0.56852	0.90347
945.73		0.93399	0.93492	0.5769	0.90555
947.15		0.95596	0.95914	0.56726	0.87636
948.57		0.95386	0.97742	0.57554	0.89762
950		0.99144	0.93628	0.57925	0.90981
951.42		0.97084	0.94053	0.5537	0.90241
952.85		0.98596	0.91876	0.56422	0.90943
954.27		0.94736	0.93257	0.57875	0.89451
955.7		0.98397	0.94439	0.596	0.90208
957.12		0.96731	0.969	0.58166	0.89254
958.54		0.96714	0.93261	0.57427	0.91266
959.97		0.98098	0.94294	0.55382	0.9039
961.39		0.94393	0.92954	0.56939	0.88989
962.82		0.96806	0.95022	0.58375	0.8898
964.24		0.97406	0.93078	0.56778	0.92427
965.67		0.97248	0.93927	0.57708	0.9015
967.09		0.95821	0.95002	0.58256	0.90368
968.51		0.98534	0.96146	0.58415	0.90625
969.94		0.97301	0.93215	0.58159	0.9025
971.36		0.95771	0.92568	0.58652	0.91541
972.79		0.96878	0.95091	0.58727	0.88203
974.21		0.98294	0.93027	0.57733	0.88935
975.64		0.99391	0.95571	0.56498	0.89668
977.06		0.9669	0.94988	0.57048	0.91882
978.48		0.95418	0.93194	0.56718	0.88184
979.91		0.94295	0.93065	0.55856	0.9208
981.33		0.96964	0.95656	0.58477	0.91226
982.76		0.95606	0.95197	0.56067	0.88701
984.18		0.93364	0.93132	0.57489	0.90999
985.61		0.97382	0.95819	0.56635	0.90455
987.03		0.98497	0.96336	0.57333	0.91615
988.45		0.99022	0.96734	0.57733	0.92673
989.88		0.92715	0.91522	0.577	0.89997
991.3		0.99086	0.91656	0.5772	0.92663
992.73		0.94922	0.93914	0.57524	0.92611
994.15		0.98558	0.92096	0.56746	0.90532
995.58		0.98284	0.93686	0.5898	0.88902
997		0.97278	0.95811	0.57793	0.8925
998.42		0.94511	0.92254	0.55797	0.93548
999.85		0.94213	0.97282	0.57553	0.9263
1001.3		0.97929	0.94574	0.58947	0.90909
1002.7		0.94977	0.96427	0.59121	0.90138
1004.1		0.97598	0.97759	0.58318	0.87901
1005.5		0.95654	0.93417	0.58394	0.92536
1007		1.008	0.99622	0.59782	0.9285
1008.4		0.94554	0.97004	0.57402	0.89371
1009.8		0.98264	0.96394	0.57125	0.91953
1011.2		0.96715	0.92916	0.58152	0.90705
1012.7		0.9668	0.96365	0.57818	0.91932
1014.1		0.93957	0.9369	0.56834	0.9187
1015.5		0.94968	0.98721	0.58729	0.91873
1016.9		0.9664	0.93748	0.57254	0.89877
1018.4		0.95089	0.93988	0.56842	0.88591
1019.8		0.97663	0.93845	0.57059	0.91119
1021.2		0.93979	0.91817	0.57192	0.92644
1022.6		1.0015	0.93587	0.57568	0.90634
1024.1		0.95455	0.94667	0.59102	0.9068
1025.5		0.9695	0.99801	0.56683	0.90483
1026.9		0.95736	0.95441	0.60117	0.91235
1028.3		0.95122	0.95474	0.57974	0.89678
1029.8		0.98006	0.94292	0.59376	0.91487
1031.2		0.94489	0.95857	0.58863	0.8863
1032.6		0.95891	0.95308	0.57525	0.91091
1034		0.95486	0.94784	0.57629	0.90208
1035.5		0.95761	0.93406	0.58421	0.91972
1036.9		0.94728	0.94138	0.56462	0.92448
1038.3		0.99843	0.93514	0.58396	0.91154
1039.7		0.97713	0.92494	0.59191	0.9029
1041.2		0.96121	0.98764	0.58805	0.91629
1042.6		0.95451	0.93944	0.57937	0.90817
1044		0.96071	0.93068	0.5845	0.90814
1045.4		0.97493	0.95881	0.58399	0.91546
1046.8		0.94878	0.93927	0.5771	0.89937
1048.3		0.9609	0.94368	0.5792	0.9306
1049.7		0.95307	0.95766	0.57675	0.9157
1051.1		0.94322	0.96617	0.57835	0.91091
1052.5		0.98845	0.96331	0.57304	0.87522
1054		0.95431	0.91376	0.59781	0.90976
1055.4		0.96425	0.93939	0.5628	0.88651
1056.8		0.95753	0.9753	0.58446	0.89919
1058.2		0.97066	0.9471	0.56798	0.9157
1059.7		0.95063	0.92356	0.58704	0.89658
1061.1		0.96535	0.94522	0.59116	0.90211
1062.5		0.9761	0.94762	0.59138	0.89721
1063.9		0.95268	0.94449	0.56416	0.90678
1065.4		0.95948	0.95794	0.60071	0.92726
1066.8		0.99081	0.95491	0.56158	0.88581
1068.2		0.98944	0.94976	0.58492	0.8783
1069.6		0.95242	0.95695	0.59308	0.90503
1071.1		0.94368	0.94727	0.58456	0.92579
1072.5		0.96301	0.96766	0.58747	0.91366
1073.9		0.95702	0.96043	0.60121	0.9094
1075.3		0.97173	0.9304	0.58514	0.90916
1076.8		0.94444	0.96729	0.59086	0.92896
1078.2		0.96998	0.93506	0.58538	0.91518
1079.6		0.96105	0.95354	0.57952	0.89885
1081		0.98795	0.96745	0.58999	0.89166
1082.5		0.98836	0.95428	0.59154	0.91208
1083.9		0.97259	0.97775	0.59031	0.93056
1085.3		0.94938	0.97775	0.59401	0.91775
1086.7		0.94448	0.95082	0.5769	0.91007
1088.2		0.96597	0.94402	0.58189	0.9288
1089.6		0.96894	0.98837	0.59716	0.91884
1091		0.97513	0.95372	0.5972	0.93138
1092.4		0.96879	0.92314	0.58952	0.9219
1093.9		0.95901	0.95837	0.58839	0.90348
1095.3		0.97648	0.94986	0.59382	0.90596
1096.7		0.95274	0.96338	0.60436	0.91555
1098.1		1.0009	0.92414	0.583	0.90806
1099.5		0.96043	0.97147	0.5862	0.89624
1101		0.9778	0.95923	0.58219	0.91561
1102.4		0.96239	0.95109	0.57286	0.93204
1103.8		0.95394	0.9188	0.59185	0.91586
1105.2		0.97053	0.96076	0.60043	0.91745
1106.7		1.0069	0.95602	0.58792	0.90839
1108.1		0.97099	0.95504	0.59982	0.93354
1109.5		0.97976	0.96186	0.59581	0.93461
1110.9		0.964	0.95988	0.58929	0.91344
1112.4		0.93671	0.96031	0.59301	0.93881
1113.8		0.96173	0.97654	0.59124	0.90309
1115.2		0.997	0.97116	0.59032	0.93512
1116.6		0.95395	0.93881	0.59187	0.9158
1118.1		1.0054	0.95788	0.59141	0.92676
1119.5		0.98609	0.91512	0.60303	0.94403
1120.9		0.9912	0.93655	0.57863	0.90346
1122.3		0.97563	0.95236	0.59924	0.88375
1123.8		0.98441	0.96194	0.58971	0.94584
1125.2		0.94117	0.95792	0.60383	0.90442
1126.6		0.9431	0.9516	0.60859	0.89964
1128		0.97036	0.92654	0.59994	0.93074
1129.5		0.93832	0.95019	0.58343	0.9094
1130.9		0.94451	0.92233	0.58485	0.89975
1132.3		0.98746	0.96439	0.59464	0.90958
1133.7		0.97695	0.94904	0.59902	0.90695
1135.2		1.0184	0.93153	0.58594	0.92079
1136.6		0.95559	0.95746	0.595	0.93095
1138		0.9687	0.97686	0.59506	0.91104
1139.4		0.96648	0.92926	0.6057	0.95203
1140.9		0.98825	0.97288	0.57243	0.93671
1142.3		0.97909	0.96971	0.58938	0.91888
1143.7		0.99293	0.94767	0.59302	0.94027
1145.1		0.97618	0.97581	0.59285	0.90373
1146.5		1.0043	0.95022	0.59421	0.92699
1148		0.95132	0.9413	0.59793	0.92021
1149.4		0.96997	0.95698	0.58355	0.93142
1150.8		0.98452	0.95129	0.60189	0.92324
1152.2		0.98621	0.95542	0.58739	0.91218
1153.7		0.97445	0.96166	0.59626	0.91787
1155.1		0.94059	0.95453	0.60799	0.91134
1156.5		0.97307	0.94567	0.58376	0.94145
1157.9		0.96832	0.94413	0.5992	0.91198
1159.4		0.95114	0.95434	0.59693	0.92656
1160.8		0.959	0.94613	0.60846	0.9523
1162.2		0.96261	0.95702	0.5795	0.90585
1163.6		0.98243	0.97011	0.59844	0.92934
1165.1		0.95872	0.95521	0.60667	0.95627
1166.5		0.94645	0.97861	0.58884	0.9324
1167.9		0.98758	0.94796	0.61383	0.91846
1169.3		0.95353	0.95672	0.60374	0.9239
1170.8		0.98173	0.9426	0.59968	0.92525
1172.2		0.96077	0.96037	0.6034	0.94092
1173.6		0.96388	0.96331	0.5943	0.92769
1175		0.98064	0.95803	0.59644	0.91617
1176.5		0.99246	0.94493	0.59475	0.91994
1177.9		0.96078	0.97023	0.58599	0.91502
1179.3		0.95696	0.94136	0.59404	0.91459
1180.7		0.98032	0.97789	0.59127	0.92288
1182.2		0.9697	0.94726	0.58438	0.92102
1183.6		0.9793	0.96053	0.5749	0.92406
1185		0.97154	0.95609	0.60944	0.93709
1186.4		0.9829	0.98375	0.59431	0.9078
1187.9		0.95592	0.96104	0.62151	0.94303
1189.3		0.98134	0.93898	0.60681	0.93364
1190.7		0.95862	0.95347	0.60033	0.92262
1192.1		0.98275	0.9915	0.61344	0.91189
1193.6		0.9824	0.97943	0.6084	0.88389
1195		0.9993	0.97364	0.59394	0.9073
1196.4		0.96021	0.96506	0.60325	0.91971
1197.8		0.96905	0.95013	0.61917	0.93899
1199.2		0.99003	0.9776	0.58814	0.93008
1200.7		0.96981	0.97875	0.58557	0.93782
1202.1		0.96339	0.96561	0.61056	0.926
1203.5		0.97346	0.93374	0.59544	0.92728
1204.9		0.95445	0.94122	0.60896	0.89574
1206.4		0.95523	0.95533	0.59367	0.92191
1207.8		0.9505	0.97136	0.61537	0.93923
1209.2		0.95478	0.95528	0.59828	0.93318
1210.6		0.98349	0.9369	0.59359	0.90466
1212.1		0.96878	0.95314	0.59808	0.93611
1213.5		0.9806	0.93752	0.60771	0.93639
1214.9		0.95702	0.95705	0.5928	0.94163
1216.3		0.97946	0.9566	0.62248	0.92881
1217.8		0.93887	0.94855	0.5969	0.92563
1219.2		0.96946	0.96762	0.62379	0.91005
1220.6		0.97666	0.96931	0.60431	0.91596
1222		0.94227	0.94526	0.5936	0.90761
1223.5		0.97507	0.97663	0.61272	0.91243
1224.9		0.95774	0.95865	0.59595	0.91215
1226.3		0.99658	0.98269	0.59105	0.94151
1227.7		0.93331	0.98232	0.59804	0.91432
1229.2		0.95267	0.94359	0.60209	0.92874
1230.6		0.95574	0.97612	0.57787	0.9116
1232		0.94958	0.98146	0.60499	0.92308
1233.4		0.96905	0.92102	0.61183	0.94094
1234.9		0.98819	0.96871	0.60248	0.91721
1236.3		0.93719	0.94985	0.60989	0.93081
1237.7		0.98209	0.95018	0.61127	0.94404
1239.1		0.98149	0.96177	0.60838	0.93258
1240.6		0.93934	0.96102	0.60468	0.92125
1242		0.97202	0.93552	0.60146	0.94265
1243.4		0.97571	0.93309	0.58277	0.93388
1244.8		0.97944	0.94686	0.59627	0.9516
1246.2		0.99202	0.92092	0.6082	0.92823
1247.7		0.96443	0.96411	0.60704	0.93602
1249.1		0.96096	0.95068	0.60585	0.91927
1250.5		0.99196	0.96058	0.61113	0.91947
1251.9		0.9673	0.96272	0.62825	0.91464
1253.4		0.96679	0.94051	0.59521	0.92291
1254.8		0.96964	0.97418	0.60266	0.90476
1256.2		0.94517	0.96118	0.60968	0.93124
1257.6		0.98865	0.94537	0.59563	0.94704
1259.1		0.99266	0.9524	0.61343	0.93566
1260.5		0.97853	0.94632	0.60712	0.9336
1261.9		0.96217	0.95367	0.58942	0.94016
1263.3		0.95212	0.95855	0.59785	0.92654
1264.8		0.99487	0.91651	0.60746	0.92572
1266.2		0.96933	0.933	0.59572	0.96563
1267.6		0.99908	0.95173	0.59838	0.92266
1269		0.9802	0.94653	0.59255	0.9241
1270.5		0.98939	0.9317	0.59386	0.96178
1271.9		0.97519	0.962	0.60705	0.90822
1273.3		0.97485	0.95941	0.61487	0.9499
1274.7		0.95902	0.96822	0.61516	0.92814
1276.2		0.98138	0.94668	0.59493	0.92503
1277.6		1.0109	0.97336	0.60936	0.92496
1279		0.96846	0.987	0.59657	0.91916
1280.4		0.96047	0.98061	0.60331	0.92545
1281.9		0.98116	0.96936	0.61566	0.93614
1283.3		0.97918	0.94573	0.60563	0.93304
1284.7		0.97608	0.95086	0.61902	0.92529
1286.1		0.97249	0.94133	0.60002	0.95005
1287.6		0.93767	0.96583	0.59951	0.91758
1289		0.97233	0.99627	0.63993	0.93772
1290.4		0.97969	0.97624	0.61734	0.93858
1291.8		0.96461	0.95611	0.60968	0.94368
1293.3		0.95909	0.96875	0.61789	0.90957
1294.7		0.96066	0.93828	0.61169	0.9365
1296.1		0.96746	0.92799	0.62928	0.93123
1297.5		0.97057	0.95054	0.60001	0.95606
1298.9		0.96742	0.96139	0.61141	0.91394
1300.4		0.95442	0.97423	0.61339	0.94977
1301.8		0.96485	0.93661	0.61005	0.91797
1303.2		0.95332	0.96553	0.61883	0.9467
1304.6		0.96989	0.99225	0.59122	0.92798
1306.1		0.94328	0.94532	0.59242	0.91491
1307.5		0.97042	0.97066	0.62665	0.90837
1308.9		0.96892	0.96806	0.61327	0.92815
1310.3		0.97425	0.98575	0.61982	0.9384
1311.8		0.96352	0.98082	0.60023	0.92136
1313.2		0.96237	0.96132	0.60966	0.91949
1314.6		0.9452	0.9336	0.61642	0.8983
1316		0.97727	0.99828	0.60299	0.93309
1317.5		0.98929	1.0091	0.59891	0.94386
1318.9		0.98901	0.96325	0.61815	0.93095
1320.3		0.96605	0.96243	0.63521	0.92192
1321.7		0.98087	0.94791	0.60893	0.92343
1323.2		0.95964	0.96509	0.61009	0.91243
1324.6		0.98576	0.96549	0.62186	0.92581
1326		0.97318	0.97186	0.62792	0.92623
1327.4		0.95856	0.96534	0.61791	0.91758
1328.9		0.95956	0.93533	0.60885	0.94561
1330.3		0.93442	0.9768	0.60891	0.92001
1331.7		0.98236	0.94043	0.62512	0.92878
1333.1		0.95966	0.90672	0.62274	0.93442
1334.6		0.95558	0.9379	0.61011	0.91938
1336		0.9555	0.92562	0.61562	0.94784
1337.4		0.93453	0.968	0.61449	0.93247
1338.8		0.9477	0.96727	0.61521	0.92519
1340.3		0.94575	0.95888	0.62531	0.9233
1341.7		0.97114	1.0016	0.61	0.9217
1343.1		0.99718	0.97113	0.61547	0.94176
1344.5		0.96771	0.95773	0.61038
1345.9				0.60819
1347.4				0.62205
1348.8				0.60079
1350.2				0.6156
1351.6				0.61021
1353.1				0.62256
1354.5				0.62901
1355.9				0.6139
1357.3				0.61746
1358.8				0.6145
1360.2				0.60572
1361.6				0.61222
1363				0.60891
1364.5				0.61488
1365.9				0.63081
1367.3				0.62331
1368.7				0.62027
1370.2				0.6104
1371.6				0.60916
1373				0.60703
1374.4				0.59646
1375.9				0.61163
1377.3				0.6119
1378.7				0.63382
1380.1				0.61817
1381.6				0.60592
1383				0.60908
1384.4				0.61994
1385.8				0.61779
1387.3				0.62044
1388.7				0.60908
1390.1				0.61086
1391.5				0.59712
1393				0.61244
1394.4				0.63103
1395.8				0.61853
1397.2				0.61873
1398.6				0.65758
1400.1				0.63191
1401.5				0.60926
1402.9				0.62592
1404.3				0.61889
1405.8				0.61766
1407.2				0.62111
1408.6				0.61953
1410				0.62056
1411.5				0.62006
1412.9				0.61534
1414.3				0.62397
1415.7				0.61791
1417.2				0.61725
1418.6				0.61343
1420				0.63702
1421.4				0.62152
1422.9				0.64537
1424.3				0.61582
1425.7				0.63201
1427.1				0.60491
1428.6				0.61454
1430				0.63284
1431.4				0.62802
1432.8				0.60634
1434.3				0.60632
1435.7				0.60045
1437.1				0.64244
1438.5				0.62387
1440				0.6238
1441.4				0.62536
1442.8				0.63856
1444.2				0.63683
1445.6				0.61551
1447.1				0.62399
1448.5				0.62756
1449.9				0.61707
1451.3				0.6122
1452.8				0.60482
1454.2				0.61308
1455.6				0.62325
1457				0.62972
1458.5				0.61823
1459.9				0.63752
1461.3				0.63553
1462.7				0.61813
1464.2				0.60983
1465.6				0.60239
1467				0.63207
1468.4				0.62247
1469.9				0.60561
1471.3				0.63533
1472.7				0.64138
1474.1				0.61261
1475.6				0.61282
1477				0.62829
1478.4				0.62263
1479.8				0.61579
1481.3				0.62839
1482.7				0.61745
1484.1				0.6061
1485.5				0.61228
1487				0.63168
1488.4				0.62075
1489.8				0.6329
1491.2				0.61456
1492.7				0.61012
1494.1				0.62878
1495.5				0.61846
1496.9				0.60606
1498.3				0.65622
1499.8				0.63003
1501.2				0.66106
1502.6				0.61576
1504				0.62306
1505.5				0.63594
1506.9				0.62666
1508.3				0.6313
1509.7				0.62645
1511.2				0.63847
1512.6				0.61831
1514				0.63342
1515.4				0.61718
1516.9				0.61734
1518.3				0.61818
1519.7				0.62138
1521.1				0.62078
1522.6				0.61704
1524				0.63264
1525.4				0.62778
1526.8				0.6297
1528.3				0.61383
1529.7				0.63676
1531.1				0.63595
1532.5				0.62893
1534				0.64216
1535.4				0.60934
1536.8				0.62785
1538.2				0.6276
1539.7				0.62083
1541.1				0.61756
1542.5				0.61751
1543.9				0.62556
1545.3				0.62722
1546.8				0.63612
1548.2				0.61295
1549.6				0.64154
1551				0.63554
1552.5				0.6216
1553.9				0.63119
1555.3				0.63663
1556.7				0.62048
1558.2				0.63299
1559.6				0.64286
1561				0.63473
1562.4				0.63006
1563.9				0.62731
1565.3				0.62048
1566.7				0.62097
1568.1				0.61384
1569.6				0.64824
1571				0.61445
1572.4				0.60964
1573.8				0.64987
1575.3				0.63357
1576.7				0.63473
1578.1				0.62497
1579.5				0.61475
1581				0.6443
1582.4				0.63389
1583.8				0.65566
1585.2				0.63625
1586.7				0.63422
1588.1				0.63446
1589.5				0.6366
1590.9				0.63398
1592.4				0.61952
1593.8				0.61321
1595.2				0.64819
1596.6				0.62019
1598				0.63176
1599.5				0.63232
1600.9				0.63265
1602.3				0.63252
1603.7				0.61557
1605.2				0.62845
1606.6				0.62737
1608				0.64467
1609.4				0.63617
1610.9				0.6206
1612.3				0.64194
1613.7				0.62967
1615.1				0.63579
1616.6				0.6422
1618				0.63507
1619.4				0.62514
1620.8				0.61961
1622.3				0.61505
1623.7				0.63862
1625.1				0.64557
1626.5				0.64163
1628				0.62498
1629.4				0.62766
1630.8				0.6428
1632.2				0.63287
1633.7				0.6408
1635.1				0.63054
1636.5				0.64874
1637.9				0.63902
1639.4				0.65642
1640.8				0.64988
1642.2				0.64654
1643.6				0.63064
1645				0.63937
1646.5				0.65536
1647.9				0.64067
1649.3				0.63791
1650.7				0.62635
1652.2				0.63527
1653.6				0.63314
1655				0.6342
1656.4				0.62146
1657.9				0.65321
1659.3				0.63566
1660.7				0.64939
1662.1				0.62666
1663.6				0.64403
1665				0.63189
1666.4				0.6257
1667.8				0.6356
1669.3				0.65254
1670.7				0.64816
1672.1				0.64537
1673.5				0.62231
1675				0.64022
1676.4				0.65249
1677.8				0.63161
1679.2				0.63535
1680.7				0.64265
1682.1				0.64092
1683.5				0.64128
1684.9				0.61305
1686.4				0.62839
1687.8				0.64469
1689.2				0.6374
1690.6				0.62606
1692.1				0.64637
1693.5				0.64533
1694.9				0.64227
1696.3				0.63661
1697.7				0.64567
1699.2				0.63568
1700.6				0.64119
1702				0.62523
1703.4				0.65887
1704.9				0.62401
1706.3				0.62715
1707.7				0.63501
1709.1				0.65164
1710.6				0.63336
1712				0.64437
1713.4				0.63891
1714.8				0.64089
1716.3				0.63638
1717.7				0.64131
1719.1				0.63454
1720.5				0.62992
1722				0.64154
1723.4				0.63671
1724.8				0.64383
1726.2				0.64429
1727.7				0.64269
1729.1				0.62065
1730.5				0.64887
1731.9				0.65534
1733.4				0.65333
1734.8				0.62937
1736.2				0.65788
1737.6				0.66316
1739.1				0.63114
1740.5				0.64647
1741.9				0.65968
1743.3				0.65402
1744.7				0.63169
1746.2				0.63372
1747.6				0.64112
1749				0.63645
1750.4				0.63675
1751.9				0.64527
1753.3				0.63629
1754.7				0.64529
1756.1				0.66029
1757.6				0.62669
1759				0.65191
1760.4				0.64897
1761.8				0.6498
1763.3				0.64268
1764.7				0.64843
1766.1				0.64382
1767.5				0.64544
1769				0.64347
1770.4				0.62672
1771.8				0.6346
1773.2				0.64678
1774.7				0.6371
1776.1				0.63809
1777.5				0.6389
1778.9				0.66394
1780.4				0.64963
1781.8				0.65783
1783.2				0.65034
1784.6				0.64482
1786.1				0.64438
1787.5				0.64804
1788.9				0.65466
1790.3				0.65854
1791.8				0.66376
1793.2				0.66586
1794.6				0.65602
1796				0.63691
1797.4				0.63752
1798.9				0.64721
1800.3				0.65054
1801.7				0.66261
1803.1				0.6494
1804.6				0.64516
1806				0.64044
1807.4				0.64836
1808.8				0.64292
1810.3				0.64411
1811.7				0.64493
1813.1				0.63609
1814.5				0.64288
1816				0.66006
1817.4				0.63049
1818.8				0.64419
1820.2				0.6628
1821.7				0.6541
1823.1				0.63063
1824.5				0.64413
1825.9				0.64235
1827.4				0.63943
1828.8				0.65517
1830.2				0.65625
1831.6				0.65648
1833.1				0.66698
1834.5				0.65264
1835.9				0.65386
1837.3				0.66435
1838.8				0.65585
1840.2				0.66107
1841.6				0.65321
1843				0.63554
1844.4				0.65396
1845.9				0.6495
1847.3				0.64967
1848.7				0.66175
1850.1				0.66184
1851.6				0.66336
1853				0.62883
1854.4				0.65185
1855.8				0.6546
1857.3				0.67389
1858.7				0.66251
1860.1				0.65367
1861.5				0.63381
1863				0.63484
1864.4				0.6424
1865.8				0.64735
1867.2				0.6447
1868.7				0.66262
1870.1				0.64743
1871.5				0.65895
1872.9				0.63556
1874.4				0.65282
1875.8				0.64805
1877.2				0.65729
1878.6				0.66008
1880.1				0.64661
1881.5				0.63983
1882.9				0.64489
1884.3				0.65265
1885.8				0.64324
1887.2				0.65738
1888.6				0.6435
1890				0.63524
1891.5				0.64982
1892.9				0.67452
1894.3				0.65292
1895.7				0.63552
1897.1				0.65953
1898.6				0.6606
1900				0.67672
1901.4				0.66649
1902.8				0.6611
1904.3				0.65404
1905.7				0.65729
1907.1				0.67034
1908.5				0.6499
1910				0.6728
1911.4				0.64502
1912.8				0.65109
1914.2				0.64565
1915.7				0.65345
1917.1				0.66355
1918.5				0.68077
1919.9				0.65907
1921.4				0.65191
1922.8				0.64932
1924.2				0.65958
1925.6				0.65049
1927.1				0.66487
1928.5				0.64295
1929.9				0.65208
1931.3				0.65101
1932.8				0.6632
1934.2				0.65066
1935.6				0.67856
1937				0.63406
1938.5				0.64953
1939.9				0.64122
1941.3				0.65558
1942.7				0.66224
1944.1				0.6446
1945.6				0.64861
1947				0.67538
1948.4				0.65913
1949.8				0.64682
1951.3				0.65744
1952.7				0.64103
1954.1				0.65421
1955.5				0.6606
1957				0.67612
1958.4				0.67351
1959.8				0.67161
1961.2				0.64702
1962.7				0.6808
1964.1				0.63518
1965.5				0.67198
1966.9				0.66798
1968.4				0.66388
1969.8				0.6499
1971.2				0.64942
1972.6				0.65502
1974.1				0.66151
1975.5				0.65784
1976.9				0.65754
1978.3				0.67058
1979.8				0.6741
1981.2				0.65815
1982.6				0.66329
1984				0.64567
1985.5				0.6678
1986.9				0.66864
1988.3				0.66201
1989.7				0.65399
1991.2				0.65426
1992.6				0.67744
1994				0.67589
1995.4				0.67298
1996.8				0.65658
1998.3				0.65539
1999.7				0.6701
2001.1				0.66954
2002.5				0.65513
2004				0.63871
2005.4				0.65269
2006.8				0.65511
2008.2				0.65154
2009.7				0.64301
2011.1				0.66314
2012.5				0.6631
2013.9				0.66318
2015.4				0.653
2016.8				0.66401
2018.2				0.66227
2019.6				0.65114
2021.1				0.66914
2022.5				0.65754
2023.9				0.65787
2025.3				0.63893
2026.8				0.6637
2028.2				0.63725
2029.6				0.67395
2031				0.66723
2032.5				0.64971
2033.9				0.66213
2035.3				0.65357
2036.7				0.64457
2038.2				0.66301
2039.6				0.66146
2041				0.65532
2042.4				0.67393
2043.8				0.67209
2045.3				0.65513
2046.7				0.67759
2048.1				0.68076
2049.5				0.66255
2051				0.6665
2052.4				0.66022
2053.8				0.64981
2055.2				0.65308
2056.7				0.66358
2058.1				0.65051
2059.5				0.6636
2060.9				0.64985
2062.4				0.66833
2063.8				0.67364
2065.2				0.64791
2066.6				0.67166
2068.1				0.6599
2069.5				0.66291
2070.9				0.665
2072.3				0.66497
2073.8				0.66312
2075.2				0.65176
2076.6				0.66253
2078				0.66677
2079.5				0.64794
2080.9				0.66561
2082.3				0.6591
2083.7				0.65834
2085.2				0.66235
2086.6				0.66636
2088				0.64469
2089.4				0.67777
2090.9				0.66065
2092.3				0.6636
2093.7				0.66286
2095.1				0.65234
2096.5				0.65509
2098				0.67146
2099.4				0.66671
2100.8				0.64853
2102.2				0.66338
2103.7				0.69221
2105.1				0.6626
2106.5				0.65249
2107.9				0.65701
2109.4				0.67709
2110.8				0.63825
2112.2				0.67216
2113.6				0.66204
2115.1				0.66845
2116.5				0.65756
2117.9				0.65848
2119.3				0.66701
2120.8				0.67738
2122.2				0.65864
2123.6				0.66701
2125				0.6672
2126.5				0.66291
2127.9				0.62515
2129.3				0.66162
2130.7				0.6563
2132.2				0.66462
2133.6				0.6364
2135				0.66089
2136.4				0.67017
2137.9				0.6972
2139.3				0.67547
2140.7				0.65206
2142.1				0.6481
2143.5				0.65483
2145				0.65902
2146.4				0.68191
2147.8				0.65751
2149.2				0.66767
2150.7				0.68509
2152.1				0.66605
2153.5				0.66653
2154.9				0.65162
2156.4				0.67904
2157.8				0.68977
2159.2				0.64533
2160.6				0.67338
2162.1				0.66224
2163.5				0.65025
2164.9				0.66963
2166.3				0.6761
2167.8				0.66644
2169.2				0.67758
2170.6				0.66006
2172				0.65385
2173.5				0.65867
2174.9				0.64717
2176.3				0.66471
2177.7				0.66127
2179.2				0.67065
2180.6				0.66278
2182				0.66876
2183.4				0.65742
2184.9				0.66912
2186.3				0.65674
2187.7				0.64246
2189.1				0.66423
2190.6				0.64971
2192				0.66976
2193.4				0.66381
2194.8				0.65156
2196.2				0.66282
2197.7				0.68581
2199.1				0.66706
2200.5				0.65342
2201.9				0.67406
2203.4				0.67995
2204.8				0.67136
2206.2				0.66841
2207.6				0.66987
2209.1				0.68652
2210.5				0.65783
2211.9				0.6695
2213.3				0.68033
2214.8				0.65856
2216.2				0.66549
2217.6				0.68494
2219				0.66598
2220.5				0.6627
2221.9				0.67905
2223.3				0.65613
2224.7				0.67933
2226.2				0.68148
2227.6				0.67631
2229				0.6476
2230.4				0.66235
2231.9				0.67389
2233.3				0.66867
2234.7				0.66502
2236.1				0.68314
2237.6				0.6498
2239				0.67147
2240.4				0.66951
2241.8				0.6724
2243.2				0.6631
2244.7				0.66903
2246.1				0.65975
2247.5				0.65678
2248.9				0.64931
2250.4				0.65788
2251.8				0.67209
2253.2				0.68077
2254.6				0.66758
2256.1				0.65576
2257.5				0.67372
2258.9				0.6932
2260.3				0.68144
2261.8				0.67178
2263.2				0.66339
2264.6				0.70071
2266				0.65864
2267.5				0.66496
2268.9				0.67754
2270.3				0.67635
2271.7				0.66177
2273.2				0.67063
2274.6				0.65206
2276				0.65428
2277.4				0.67778
2278.9				0.67847
2280.3				0.65651
2281.7				0.65418
2283.1				0.68175
2284.6				0.65915
2286				0.6641
2287.4				0.68027
2288.8				0.66192
2290.2				0.66429
2291.7				0.6575
2293.1				0.66792
2294.5				0.66017
2295.9				0.69355
2297.4				0.66138
2298.8				0.66879
2300.2				0.66633
2301.6				0.68595
2303.1				0.66945
2304.5				0.65481
2305.9				0.67224
2307.3				0.66715
2308.8				0.66121
2310.2				0.66733
2311.6				0.68782
2313				0.68472
2314.5				0.67133
2315.9				0.67126
2317.3				0.67307
2318.7				0.68127
2320.2				0.68447
2321.6				0.67855
2323				0.66597
2324.4				0.68484
2325.9				0.67611
2327.3				0.6902
2328.7				0.67004
2330.1				0.68941
2331.6				0.67433
2333				0.67517
2334.4				0.68242
2335.8				0.66148
2337.3				0.68994
2338.7				0.69639
2340.1				0.66539
2341.5				0.6762
2342.9				0.67159
2344.4				0.68584
2345.8				0.67054
2347.2				0.68343
2348.6				0.69079
2350.1				0.66545
2351.5				0.6703
2352.9				0.66797
2354.3				0.67513
2355.8				0.6684
2357.2				0.67746
2358.6				0.68307
2360				0.68272
2361.5				0.67732
2362.9				0.65437
2364.3				0.65907
2365.7				0.6889
2367.2				0.65908
2368.6				0.67722
2370				0.66989
2371.4				0.66926
2372.9				0.66462
2374.3				0.68189
2375.7				0.67458
2377.1				0.68139
2378.6				0.70051
2380				0.68515
2381.4				0.65972
2382.8				0.69557
2384.3				0.68482
2385.7				0.67752
2387.1				0.65797
2388.5				0.68233
2389.9				0.66618
2391.4				0.66568
2392.8				0.68314
2394.2				0.68181
2395.6				0.68585
2397.1				0.67787
2398.5				0.68087
2399.9				0.67796
2401.3				0.66739
2402.8				0.66724
2404.2				0.67127
2405.6				0.68499
2407				0.68408
2408.5				0.67825
2409.9				0.68256
2411.3				0.66857
2412.7				0.68629
2414.2				0.68057
2415.6				0.65969
2417				0.67305
2418.4				0.68365
2419.9				0.6897
2421.3				0.67835
2422.7				0.6553
2424.1				0.67754
2425.6				0.66217
2427				0.68709
2428.4				0.68169
2429.8				0.68743
2431.3				0.68276
2432.7				0.6898
2434.1				0.67553
2435.5				0.68366
2437				0.68773
2438.4				0.68137
2439.8				0.67528
2441.2				0.70554
2442.6				0.67694
2444.1				0.67821
2445.5				0.68452
2446.9				0.65748
2448.3				0.66784
2449.8				0.67658
2451.2				0.67355
2452.6				0.68
2454				0.68962
2455.5				0.68797
2456.9				0.66458
2458.3				0.68577
2459.7				0.68494
2461.2				0.70261
2462.6				0.66211
2464				0.65242
2465.4				0.69586
2466.9				0.69623
2468.3				0.67577
2469.7				0.6753
2471.1				0.68153
2472.6				0.67903
2474				0.67161
2475.4				0.67564
2476.8				0.65876
2478.3				0.69283
2479.7				0.68371
2481.1				0.67712
2482.5				0.68435
2484				0.68496
2485.4				0.69869
2486.8				0.68468
2488.2				0.67873
2489.6				0.68166
2491.1				0.68503
2492.5				0.68217
2493.9				0.68527
2495.3				0.67442
2496.8				0.6698
2498.2				0.66294
2499.6				0.68331
2501				0.67816
2502.5				0.66296
2503.9				0.68053
2505.3				0.6703
2506.7				0.68493
2508.2				0.66897
2509.6				0.67057
2511				0.67451
2512.4				0.68093
2513.9				0.65706
2515.3				0.67889
2516.7				0.69784
2518.1				0.6732
2519.6				0.67539
2521				0.69323
2522.4				0.70509
2523.8				0.68879
2525.3				0.69452
2526.7				0.69076
2528.1				0.6694
2529.5				0.68926
2531				0.67881
2532.4				0.68555
2533.8				0.68509
2535.2				0.69353
2536.7				0.69399
2538.1				0.67521
2539.5				0.66768
2540.9				0.69277
2542.3				0.69678
2543.8				0.70089
2545.2				0.68478
2546.6				0.68853
2548				0.69561
2549.5				0.66808
2550.9				0.69401
2552.3				0.67859
2553.7				0.70429
2555.2				0.65726
2556.6				0.66492
2558				0.68455
2559.4				0.695
2560.9				0.67631
2562.3				0.70063
2563.7				0.68235
2565.1				0.69147
2566.6				0.68641
2568				0.66728
2569.4				0.69437
2570.8				0.68159
2572.3				0.67128
2573.7				0.66545
2575.1				0.68701
2576.5				0.68792
2578				0.68153
2579.4				0.67565
2580.8				0.6821
2582.2				0.68638
2583.7				0.70387
2585.1				0.68841
2586.5				0.70021
2587.9				0.70269
2589.3				0.67093
2590.8				0.65736
2592.2				0.6784
2593.6				0.68428
2595				0.67297
2596.5				0.68041
2597.9				0.68032
2599.3				0.6748
2600.7				0.69628
2602.2				0.67602
2603.6				0.68208
2605				0.66255
2606.4				0.6856
2607.9				0.67697
2609.3				0.68188
2610.7				0.68
2612.1				0.65793
2613.6				0.66398
2615				0.67231
2616.4				0.68351
2617.8				0.66049
2619.3				0.67661
2620.7				0.68679
2622.1				0.6946
2623.5				0.69178
2625				0.68882
2626.4				0.66696
2627.8				0.67642
2629.2				0.69583
2630.7				0.6887
2632.1				0.70533
2633.5				0.6881
2634.9				0.67674
2636.4				0.66916
2637.8				0.68127
2639.2				0.68266
2640.6				0.6979
2642				0.69525
2643.5				0.67908
2644.9				0.67075
2646.3				0.6774
2647.7				0.67879
2649.2				0.67429
2650.6				0.67551
2652				0.69821
2653.4				0.68735
2654.9				0.66955
2656.3				0.69903
2657.7				0.66795
2659.1				0.68062
2660.6				0.69038
2662				0.68993
2663.4				0.67797
2664.8				0.71564
2666.3				0.6837
2667.7				0.67994
2669.1				0.68143
2670.5				0.67559
2672				0.68126
2673.4				0.6675
2674.8				0.68553
2676.2				0.67971
2677.7				0.70231
2679.1				0.67054
2680.5				0.69617
2681.9				0.7087
2683.4				0.67412
2684.8				0.68923
2686.2				0.69143
2687.6				0.68951
2689				0.66812
2690.5				0.65945
2691.9				0.68632
2693.3				0.69003
2694.7				0.6902
2696.2				0.68256
2697.6				0.68615
2699				0.67655
2700.4				0.69752
2701.9				0.66854
2703.3				0.68451
2704.7				0.69436
2706.1				0.68597
2707.6				0.68434
2709				0.67312
2710.4				0.69866
2711.8				0.67
2713.3				0.69235
2714.7				0.67617
2716.1				0.67312
2717.5				0.68805
2719				0.67961
2720.4				0.66534
2721.8				0.68589
2723.2				0.69016
2724.7				0.6687
2726.1				0.68299
2727.5				0.68143
2728.9				0.70135
2730.4				0.70029
2731.8				0.69959
2733.2				0.68753
2734.6				0.68783
2736.1				0.67857
2737.5				0.71797
2738.9				0.69514
2740.3				0.70044
2741.7				0.69209
2743.2				0.69702
2744.6				0.70917
2746				0.68105
2747.4				0.68616
2748.9				0.68594
2750.3				0.68307
2751.7				0.7016
2753.1				0.69074
2754.6				0.67723
2756				0.6924
2757.4				0.70268
2758.8				0.67229
2760.3				0.69316
2761.7				0.69792
2763.1				0.69368
2764.5				0.67896
2766				0.68417
2767.4				0.68785
2768.8				0.67119
2770.2				0.69175
2771.7				0.69126
2773.1				0.70772
2774.5				0.69499
2775.9				0.68703
2777.4				0.69277
2778.8				0.70676
2780.2				0.68468
2781.6				0.69374
2783.1				0.70197
2784.5				0.68529
2785.9				0.68676
2787.3				0.69805
2788.7				0.69721
2790.2				0.69663
2791.6				0.70513
2793				0.69549
2794.4				0.68227
2795.9				0.67709
2797.3				0.71782
2798.7				0.66813
2800.1				0.67581
2801.6				0.70108
2803				0.71213
2804.4				0.71111
2805.8				0.68749
2807.3				0.71143
2808.7				0.68038
2810.1				0.68823
2811.5				0.69314
2813				0.68534
2814.4				0.69758
2815.8				0.68634
2817.2				0.67868
2818.7				0.68378
2820.1				0.67775
2821.5				0.70004
2822.9				0.6929
2824.4				0.68753
2825.8				0.68169
2827.2				0.69648
2828.6				0.6942
2830.1				0.71522
2831.5				0.69625
2832.9				0.70689
[truncated: 2,955 more rows]

## Sheet: Figure 5B
Individual Dconfocal (um2s-1)
PBS buffer	BSA (50mg/mL)	Cytoplasm	Hela extract
38.442	76.134	3.5956	20.34			Quinacrine comparison
45.04	61.61	2.4427	18.191
32.811	40.782	2.413	15.173
45.497	31.872	2.0617	14.39
90.29	44.169	2.2693	12.489
41.995	30.574	2.5939	12.922
47.788	28.537	2.1402	14.069
33.468	42.678	3.2002	15.18
33.045	56.049	2.7566	12.994
59.473	37.112	2.2123	24.992
43.133	35.703	2.1048	16.47
44.422	92.825	4.2665	15.765
33.756	54.623	3.0807	13.969
55.221	41.143	2.7293	15.522
45.14	30.908	3.7424	16.452
48.541	43.56	2.6801	17.426
60.231	73.903	2.2469	13.39
41.012	60.097	2.6825	13.018
88.284	43.549	2.6187	18.151
30.566	73.227	2.1531	15.744
57.57	48.497	1.7038	17.931
37.856	41.65	2.4829	12.067
38.615	49.735	2.4816	16.95
53.327	24.258	1.7254	16.326
37.717	30.244	2.8811	14.152
57.008	48.362	2.0719	16.018
34.03	35.404	1.9293	11.455
44.11	43.466	2.3798	13.247
40.334	31.545		15.533
46.739			15.173

## Sheet: Figure 5C
	Combined Dconfocal (um2s-1)	Standard Error	Percentage error
PBS buffer	41.9	3.03908	7.25995
BSA (50mg/mL)	42.158	3.62305	8.59392			Quinarcirne Comparisons
Cytoplasm	2.5	0.0927235	3.78071
Hela extract	15.1	0.602173	3.98715
