# Supplementary material for: Reversing protonation of weakly basic drugs greatly enhances intracellular diffusion and decreases lysosomal sequestration
Source: eLife. 2024 Dec 6;13:RP97255. doi: 10.7554/eLife.97255 (PMC11623935; doi:10.7554/eLife.97255)
Supplement: Figure 6—source data 1. [file elife-97255-fig6-data1.xlsx]

## Sheet: Figure 6A
Time axis (re-adjusted)	Pre-Bleach	Recovery (Cytoplasm)				Mitoxantrone XY FRAP (averaged) Normalized
-0.516	0.97743
-0.344	1
-0.172	0.97061
0		0.23315
0.172		0.25723
0.344		0.28608
0.516		0.29654
0.688		0.30759
0.86		0.31554
1.032		0.33486
1.204		0.33931
1.376		0.33841
1.548		0.34499
1.72		0.35871
1.892		0.36064
2.064		0.37276
2.236		0.36884
2.408		0.38227
2.58		0.37419
2.752		0.36518
2.924		0.38161
3.096		0.39481
3.268		0.3656
3.44		0.37748
3.612		0.40539
3.784		0.37869
3.956		0.39575
4.128		0.39528
4.3		0.4035
4.472		0.39635
4.644		0.39213
4.816		0.40535
4.988		0.39991
5.16		0.41395
5.332		0.41104
5.504		0.40947
5.676		0.40022
5.848		0.40698
6.02		0.418
6.192		0.4154
6.364		0.40482
6.536		0.41394
6.708		0.39578
6.88		0.42884
7.052		0.40379
7.224		0.42111
7.396		0.41385
7.568		0.42274
7.74		0.41095
7.912		0.4233
8.084		0.41082
8.256		0.44006
8.428		0.42011
8.6		0.41918
8.772		0.43612
8.944		0.42714
9.116		0.41518
9.288		0.42609
9.46		0.43693
9.632		0.43566
9.804		0.44531
9.976		0.43206
10.148		0.41652
10.32		0.44667
10.492		0.43925
10.664		0.43176
10.836		0.43244
11.008		0.43837
11.18		0.42706
11.352		0.43091
11.524		0.42346
11.696		0.43705
11.868		0.43947
12.04		0.45492
12.212		0.43828
12.384		0.44285
12.556		0.45763
12.728		0.44099
12.9		0.45302
13.072		0.42816
13.244		0.42752
13.416		0.43659
13.588		0.45484
13.76		0.44345
13.932		0.43748
14.104		0.45141
14.276		0.46432
14.448		0.45124
14.62		0.44734
14.792		0.43853
14.964		0.44294
15.136		0.4509
15.308		0.45395
15.48		0.45624
15.652		0.45204
15.824		0.44256
15.996		0.43523
16.168		0.44353
16.34		0.44065
16.512		0.45132
16.684		0.45052
16.856		0.44531
17.028		0.44582
17.2		0.44616
17.372		0.45598
17.544		0.45018
17.716		0.4606
17.888		0.45552
18.06		0.44844
18.232		0.45594
18.404		0.44819
18.576		0.43815
18.748		0.45492
18.92		0.45238
19.092		0.4509
19.264		0.43676
19.436		0.46678
19.608		0.45425
19.78		0.45873
19.952		0.42617
20.124		0.45145
20.296		0.44569
20.468		0.44396
20.64		0.4434
20.812		0.45425
20.984		0.45107
21.156		0.45065
21.328		0.45302
21.5		0.44023
21.672		0.44379
21.844		0.44467
22.016		0.43981
22.188		0.46081
22.36		0.44662
22.532		0.45869
22.704		0.44429
22.876		0.45272
23.048		0.43438
23.22		0.43409
23.392		0.43688
23.564		0.43803
23.736		0.46441
23.908		0.44887
24.08		0.43942
24.252		0.44967
24.424		0.46576
24.596		0.44518
24.768		0.4376
24.94		0.43964
25.112		0.4412
25.284		0.43947

## Sheet: Figure 6E
Time axis (re-adjusted)	Pre-Bleach	Recovery (Cytoplasm)			Primaquine XY FRAP (averaged) Normalized
-0.858	1.0202
-0.561	1
-0.28	0.98019
0		0.36895
0.28		0.41
0.561		0.42593
0.858		0.4333
1.154		0.44478
1.45		0.45176
1.747		0.45402
2.043		0.46036
2.371		0.4643
2.667		0.47043
2.964		0.47511
3.307		0.47972
3.588		0.48236
3.868		0.48481
4.18		0.49047
4.477		0.48952
4.789		0.49498
5.07		0.49786
5.35		0.50067
5.662		0.5048
5.959		0.50636
6.255		0.50496
6.52		0.50817
6.801		0.51138
7.082		0.51629
7.363		0.51633
7.644		0.51194
7.94		0.51707
8.236		0.52175
8.533		0.51782
8.814		0.51812
9.094		0.51841
9.375		0.5236
9.687		0.52178
9.984		0.52525
10.296		0.52793
10.576		0.52479
10.857		0.52542
11.169		0.52443
11.466		0.52999
11.793		0.53167
12.09		0.53026
12.37		0.52965
12.682		0.53276
12.979		0.53078
13.306		0.53102
13.587		0.52994
13.915		0.53447
14.211		0.5345
14.508		0.53336
14.82		0.53586
15.1		0.53404
15.428		0.53862
15.724		0.53417
16.021		0.5379
16.302		0.53728
16.582		0.53865
16.879		0.53311
17.144		0.53737
17.456		0.53879
17.737		0.54069
18.033		0.53896
18.361		0.54218
18.657		0.53705
18.954		0.54221
19.25		0.53655
19.547		0.54203
19.859		0.54057
20.171		0.53712
20.467		0.54225
20.81		0.54174
21.091		0.53977
21.372		0.53889
21.684		0.53673
21.98		0.53881
22.277		0.53799
22.573		0.53701
22.854		0.53999
23.166		0.5397
23.431		0.53903
23.727		0.53947
23.993		0.53635
24.289		0.54124
24.585		0.53698
24.866		0.54152
25.147		0.539
25.443		0.54308
25.74		0.54143
26.036		0.54075
26.348		0.54241
26.629		0.54321
26.957		0.54259
27.237		0.53913
27.549		0.541
27.861		0.5436
28.158		0.54278
28.454		0.54624
