# Supplementary material for: Reversing protonation of weakly basic drugs greatly enhances intracellular diffusion and decreases lysosomal sequestration
Source: eLife. 2024 Dec 6;13:RP97255. doi: 10.7554/eLife.97255 (PMC11623935; doi:10.7554/eLife.97255)
Supplement: Figure 7—figure supplement 1—source data 1. [file elife-97255-fig7-figsupp1-data1.xlsx]

## Sheet: F7-FS1-C
Time axis (re-adjusted)	Pre-Bleach	0 Bafilomycin (un-treated)	100nm Bafilomycin								GSK3 inhibitor with Bafilomycin A1 effect
-12.819	1							FRAP profile averaged Normalized			in HeLa Cytoplasm
-11.394	1.0124
-9.97	0.9891
-8.5457	0.99926
7.1214	1.0094
-5.6971	0.98671
-4.2729	0.98378
-2.8486	0.98365
-1.4243	0.99346
0		0.085172	0.088553
1.4243		0.081956	0.093628
2.8486		0.085251	0.088863
4.2729		0.090669	0.10264
5.6971		0.091408	0.10274
7.1214		0.097763	0.095409
8.5457		0.085902	0.10509
9.97		0.097678	0.10155
11.394		0.09436	0.11608
12.819		0.1028	0.10451
14.243		0.10613	0.10926
15.667		0.10561	0.10368
17.091		0.10268	0.10194
18.516		0.11216	0.10758
19.94		0.11106	0.11983
21.364		0.10226	0.11152
22.789		0.11805	0.11403
24.213		0.11685	0.12059
25.637		0.1163	0.11062
27.061		0.12183	0.1074
28.486		0.11541	0.11428
29.91		0.12477	0.11237
31.334		0.11248	0.1186
32.759		0.12505	0.11934
34.183		0.13011	0.11866
35.607		0.11616	0.12488
37.031		0.12453	0.12167
38.456		0.12174	0.1232
39.88		0.12539	0.12695
41.304		0.12302	0.12688
42.729		0.13488	0.13272
44.153		0.13118	0.12848
45.577		0.12607	0.12698
47.001		0.13037	0.12123
48.426		0.13071	0.11551
49.85		0.14457	0.13564
51.274		0.14029	0.12635
52.699		0.12891	0.13224
54.123		0.14727	0.13296
55.547		0.14006	0.13566
56.971		0.15128	0.14171
58.396		0.14831	0.13555
59.82		0.14742	0.1312
61.244		0.14731	0.13686
62.669		0.14385	0.14482
64.093		0.14534	0.13787
65.517		0.13646	0.1297
66.941		0.15636	0.13455
68.366		0.15575	0.13187
69.79		0.15571	0.14208
71.214		0.1522	0.1419
72.639		0.14219	0.13901
74.063		0.17175	0.13474
75.487		0.15063	0.13538
76.911		0.15517	0.1413
78.336		0.15966	0.14333
79.76		0.16459	0.14432
81.184		0.17282	0.13993
82.609		0.17985	0.14118
84.033		0.15388	0.13627
85.457		0.17445	0.1484
86.881		0.16379	0.14452
88.306		0.16154	0.14198
89.73		0.18018	0.1511
91.154		0.16918	0.14026
92.579		0.1593	0.14308
94.003		0.17766	0.15642
95.427		0.16178	0.15375
96.851		0.17383	0.1433
98.276		0.16089	0.15068
99.7		0.17692	0.13925
101.12		0.17501	0.14365
102.55		0.17822	0.15114
103.97		0.1799	0.15263
105.4		0.17712	0.14105
106.82		0.18704	0.14572
108.25		0.17395	0.15735
109.67		0.18754	0.1579
111.09		0.17869	0.14838
112.52		0.18385	0.15469
113.94		0.19015	0.15791
115.37		0.19062	0.15354
116.79		0.18665	0.15342
118.22		0.17903	0.15563
119.64		0.19698	0.14877
121.06		0.19588	0.15875
122.49		0.2029	0.16187
123.91		0.18446	0.15817
125.34		0.19054	0.1584
126.76		0.19753	0.15723
128.19		0.18066	0.16762
129.61		0.19258	0.15631
131.03		0.19893	0.15616
132.46		0.18198	0.16344
133.88		0.19626	0.17137
135.31		0.1872	0.15932
136.73		0.20509	0.17092
138.16		0.20295	0.16554
139.58		0.2112	0.1548
141		0.19854	0.16849
142.43		0.20322	0.16408
143.85		0.21281	0.17163
145.28		0.20956	0.17278
146.7		0.20718	0.16791
148.13		0.22094	0.175
149.55		0.21616	0.16034
150.97		0.20325	0.17903
152.4		0.2111	0.18106
153.82		0.20152	0.17805
155.25		0.2185	0.17331
156.67		0.21878	0.17846
158.1		0.20699	0.1585
159.52		0.21345	0.17807
160.94		0.21584	0.1703
162.37		0.21374	0.17192
163.79		0.20421	0.17135
165.22		0.224	0.16835
166.64		0.21131	0.1731
168.07		0.21303	0.16863
169.49		0.23922	0.17364
170.91		0.2178	0.17786
172.34		0.20272	0.16996
173.76		0.23454	0.18094
175.19		0.2286	0.15684
176.61		0.21906	0.18645
178.04		0.22832	0.16479
179.46		0.2268	0.17801
180.88		0.21677	0.1817
182.31		0.21797	0.17778
183.73		0.23789	0.17536
185.16		0.24599	0.19205
186.58		0.21848	0.17003
188.01		0.22784	0.17812
189.43		0.2281	0.18576
190.85		0.22491	0.17542
192.28		0.23531	0.1784
193.7		0.23549	0.18524
195.13		0.22435	0.18363
196.55		0.21746	0.18657
197.98		0.23663	0.17103
199.4		0.21895	0.1901
200.82		0.22347	0.18777
202.25		0.2352	0.17922
203.67		0.23475	0.19463
205.1		0.2292	0.17625
206.52		0.2346	0.18086
207.95		0.23152	0.17907
209.37		0.23956	0.17667
210.79		0.22888	0.18504
212.22		0.23711	0.18498
213.64		0.24112	0.18672
215.07		0.25113	0.1791
216.49		0.23307	0.18891
217.92		0.23489	0.19678
219.34		0.25818	0.19314
220.76		0.22858	0.18528
222.19		0.24992	0.18964
223.61		0.244	0.18997
225.04		0.24818	0.19783
226.46		0.25281	0.18654
227.89		0.24895	0.18497
229.31		0.25033	0.18698
230.73		0.24869	0.18812
232.16		0.25667	0.19181
233.58		0.24649	0.17593
235.01		0.25541	0.19095
236.43		0.26197	0.18949
237.86		0.2517	0.19018
239.28		0.23964	0.19532
240.7		0.26718	0.18971
242.13		0.25463	0.18702
243.55		0.25939	0.18581
244.98		0.2637	0.20226
246.4		0.26036	0.20562
247.83		0.26548	0.19558
249.25		0.25052	0.18399
250.67		0.26626	0.20099
252.1		0.25805	0.1951
253.52		0.2641	0.20311
254.95		0.25854	0.19463
256.37		0.2488	0.20339
257.8		0.27319	0.19639
259.22		0.2664	0.20141
260.64		0.26891	0.19529
262.07		0.26199	0.20253
263.49		0.25275	0.19631
264.92		0.27342	0.19464
266.34		0.25948	0.19741
267.77		0.26646	0.20959
269.19		0.24313	0.19941
270.61		0.27089	0.20465
272.04		0.26424	0.20785
273.46		0.25985	0.20852
274.89		0.26172	0.19473
276.31		0.28242	0.21635
277.74		0.25461	0.20696
279.16		0.26506	0.20359
280.58		0.26265	0.19018
282.01		0.26839	0.20724
283.43		0.26733	0.2015
284.86		0.26416	0.19824
286.28		0.26854	0.20519
287.71		0.27482	0.20726
289.13		0.29579	0.20857
290.55		0.28275	0.21925
291.98		0.2731	0.20762
293.4		0.28943	0.21314
294.83		0.27877	0.20816
296.25		0.27386	0.21371
297.68		0.26127	0.20764
299.1		0.28778	0.21739
300.52		0.28309	0.20857
301.95		0.28257	0.21038
303.37		0.28519	0.21987
304.8		0.27282	0.21376
306.22		0.2715	0.20922
307.65		0.29115	0.21217
309.07		0.29344	0.20557
310.49		0.28187	0.21009
311.92		0.27725	0.21034
313.34		0.27751	0.22256
314.77		0.28	0.20305
316.19		0.27934	0.22593
317.62		0.28476	0.21729
319.04		0.28049	0.21645
320.46		0.28789	0.21755
321.89		0.27047	0.21696
323.31		0.28095	0.21534
324.74		0.30872	0.22316
326.16		0.29293	0.21329
327.59		0.30865	0.22079
329.01		0.2895	0.20714
330.43		0.27721	0.21814
331.86		0.27888	0.21962
333.28		0.29764	0.22132
334.71		0.29652	0.22397
336.13		0.30261	0.21658
337.56		0.29449	0.21238
338.98		0.30209	0.21695
340.4		0.29472	0.21962
341.83		0.29152	0.21101
343.25		0.29001	0.22211
344.68		0.2931	0.22296
346.1		0.29242	0.23295
347.53		0.29416	0.20587
348.95		0.29749	0.2156
350.37		0.30258	0.21979
351.8		0.28517	0.22318
353.22		0.30135	0.221
354.65		0.31094	0.2242
356.07		0.30264	0.21241
357.5		0.30626	0.22712
358.92		0.30285	0.23356
360.34		0.31304	0.21692
361.77		0.31289	0.22629
363.19		0.30479	0.21272
364.62		0.29277	0.22414
366.04		0.29939	0.21823
367.47		0.30787	0.21806
368.89		0.31789	0.2348
370.31		0.30702	0.23259
371.74		0.31351	0.2259
373.16		0.31584	0.22326
374.59		0.28964	0.22712
376.01		0.31425	0.23045
377.44		0.29872	0.232
378.86		0.31615	0.23026
380.28		0.31078	0.23869
381.71		0.29638	0.22254
383.13		0.30641	0.2198
384.56		0.31517	0.22561
385.98		0.30858	0.22142
387.41		0.31985	0.23142
388.83		0.30604	0.21945
390.25		0.31543	0.23231
391.68		0.32505	0.24078
393.1		0.3183	0.2368
394.53		0.31974	0.24159
395.95		0.31654	0.23015
397.38		0.32703	0.22302
398.8		0.32839	0.23915
400.22		0.30818	0.23129
401.65		0.32166	0.23056
403.07		0.31691	0.23281
404.5		0.30333	0.22983
405.92		0.30981	0.23021
407.35		0.3318	0.24183
408.77		0.31632	0.23205
410.19		0.329	0.23334
411.62		0.3022	0.22519
413.04		0.33561	0.2366
414.47		0.32471	0.23648
415.89		0.32131	0.2271
417.32		0.30993	0.23748
418.74		0.32022	0.23117
420.16		0.31956	0.22909
421.59		0.32677	0.2505
423.01		0.34743	0.24691
424.44		0.32235	0.23516
425.86		0.33189	0.23585
427.29		0.32723	0.23843
428.71		0.33291	0.23772
430.13		0.34532	0.23345
431.56		0.30434	0.23253
432.98		0.3184	0.23921
434.41		0.34608	0.24222
435.83		0.33009	0.25009
437.26		0.33981	0.23779
438.68		0.30365	0.25113
440.1		0.32177	0.25197
441.53		0.33836	0.23767
442.95		0.31189	0.25756
444.38		0.32388	0.24739
445.8		0.33416	0.23801
447.23		0.33896	0.23947
448.65		0.32862	0.24864
450.07		0.32734	0.24439
451.5		0.33026	0.24151
452.92		0.34504	0.2358
454.35		0.33637	0.23374
455.77		0.34049	0.24856
457.2		0.33891	0.23617
458.62		0.35538	0.24476
460.04		0.32497	0.2431
461.47		0.33821	0.24711
462.89		0.3515	0.26109
464.32		0.33817	0.25011
465.74		0.34395	0.25121
467.17		0.33819	0.24084
468.59		0.32034	0.24796
470.01		0.34384	0.23915
471.44		0.34121	0.24997
472.86		0.34682	0.2602
474.29		0.33339	0.24573
475.71		0.33151	0.24476
477.14		0.34381	0.24678
478.56		0.32328	0.24603
479.98		0.34735	0.25812
481.41		0.34993	0.2472
482.83		0.34843	0.24099
484.26		0.351	0.24588
485.68		0.34466	0.24416
487.11		0.35646	0.24175
488.53		0.34292	0.24707
489.95		0.34032	0.25517
491.38		0.34113	0.26115
492.8		0.33747	0.24943
494.23		0.35322	0.26271
495.65		0.3465	0.25529
497.08		0.33951	0.25308
498.5		0.34935	0.25362
499.92		0.34807	0.26668
501.35		0.33989	0.25619
502.77		0.32658	0.25486
504.2		0.35554	0.2519
505.62		0.33958	0.24627
507.05		0.33939	0.25347
508.47		0.36244	0.25371
509.89		0.34164	0.25078
511.32		0.34101	0.2516
512.74		0.34353	0.26125
514.17		0.35834	0.26314
515.59		0.35658	0.25974
517.02		0.35137	0.26739
518.44		0.35228	0.26762
519.86		0.35412	0.25496
521.29		0.37171	0.27329
522.71		0.36347	0.25843
524.14		0.36351	0.27013
525.56		0.35661	0.26547
526.99		0.35777	0.25754
528.41		0.37098	0.26518
529.83		0.37294	0.25706
531.26		0.36448	0.26758
532.68		0.35933	0.26571
534.11		0.34189	0.25529
535.53		0.34493	0.26065
536.96		0.36895	0.27799
538.38		0.35066	0.27167
539.8		0.34704	0.2561
541.23		0.36128	0.2541
542.65		0.34709	0.26085
544.08		0.37024	0.26755
545.5		0.35882	0.26951
546.93		0.37291	0.26004
548.35		0.36993	0.26642
549.77		0.37569	0.26741
551.2		0.36253	0.26893
552.62		0.39057	0.2691
554.05		0.36143	0.25309
555.47		0.36948	0.27207
556.9		0.37311	0.26792
558.32		0.37132	0.25522
559.74		0.37041	0.26036
561.17		0.36135	0.27433
562.59		0.36767	0.26779
564.02		0.3481	0.27347
565.44		0.35866	0.2589
566.87		0.36941	0.26928
568.29		0.38011	0.26148
569.71		0.36092	0.27468
571.14		0.38198	0.26205
572.56		0.36356	0.2639
573.99		0.37518	0.26391
575.41		0.36435	0.27948
576.84		0.38081	0.25791
578.26		0.38513	0.27666
579.68		0.37423	0.2598
581.11		0.3716	0.27459
582.53		0.3802	0.27665
583.96		0.38297	0.26868
585.38		0.37473	0.26154
586.81		0.37743	0.27357
588.23		0.37637	0.28152
589.65		0.37001	0.27476
591.08		0.37564	0.26977
592.5		0.36467	0.25993
593.93		0.37918	0.27059
595.35		0.38601	0.2608
596.78		0.3973	0.26076
598.2		0.36934	0.26085
599.62		0.37966	0.26421
601.05		0.38288	0.27235
602.47		0.36577	0.27918
603.9		0.38988	0.27412
605.32		0.37135	0.27763
606.75		0.37668	0.27893
608.17		0.38789	0.25525
609.59		0.37596	0.27383
611.02		0.3593	0.26987
612.44		0.39922	0.27143
613.87		0.37705	0.28164
615.29		0.38681	0.28503
616.72		0.40035	0.2768
618.14		0.38608	0.27274
619.56		0.37098	0.2668
620.99		0.37912	0.27699
622.41		0.40385	0.27518
623.84		0.39016	0.28675
625.26		0.40309	0.2768
626.69		0.38716	0.26979
628.11		0.40295	0.26845
629.53		0.3786	0.27361
630.96		0.37374	0.28547
632.38		0.38898	0.29358
633.81		0.38445	0.27132
635.23		0.38182	0.28202
636.66		0.40961	0.2821
638.08		0.39349	0.27882
639.5		0.40294	0.27695
640.93		0.38601	0.29596
642.35		0.38308	0.28287
643.78		0.39789	0.29055
645.2		0.39482	0.27126
646.63		0.38497	0.27898
648.05		0.3792	0.27831
649.47		0.41223	0.28057
650.9		0.41072	0.27884
652.32		0.38877	0.29179
653.75		0.40316	0.27367
655.17		0.40352	0.27988
656.6		0.38847	0.28256
658.02		0.40156	0.28758
659.44		0.38965	0.27926
660.87		0.3898	0.28793
662.29		0.40827	0.28636
663.72		0.41123	0.28464
665.14		0.39239	0.2763
666.57		0.39733	0.28823
667.99		0.39488	0.28573
669.41		0.38427	0.30069
670.84		0.40666	0.29117
672.26		0.39635	0.27942
673.69		0.39509	0.27349
675.11		0.38473	0.28215
676.54		0.38969	0.2925
677.96		0.41195	0.28741
679.38		0.39745	0.28734
680.81		0.39659	0.28292
682.23		0.39632	0.28117
683.66		0.41266	0.29906
685.08		0.40702	0.2828
686.51		0.40007	0.28348
687.93		0.4197	0.27419
689.35		0.41271	0.28909
690.78		0.4029	0.28661
692.2		0.40206	0.28471
693.63		0.41979	0.28667
695.05		0.39523	0.29223
696.48		0.39351	0.29406
697.9		0.39322	0.2906
699.32		0.41733	0.29964
700.75		0.39895	0.29254
702.17		0.40534	0.29505
703.6		0.41047	0.29176
705.02		0.39434	0.29069
706.45		0.41661	0.29466
707.87		0.42476	0.29507
709.29		0.40584	0.28202
710.72		0.39865	0.28538
712.14		0.40721	0.30772
713.57		0.40323	0.27874
714.99		0.41201	0.28754
716.42		0.40461	0.2909
717.84		0.40495	0.27628
719.26		0.40169	0.28863
720.69		0.42393	0.2986
722.11		0.40808	0.29599
723.54		0.39884	0.3085
724.96		0.41163	0.28744
726.39		0.42344	0.28755
727.81		0.41424	0.29539
729.23		0.42715	0.30616
730.66		0.40891	0.29138
732.08		0.41796	0.29018
733.51		0.41619	0.30465
734.93		0.42302	0.30649
736.36		0.42031	0.29223
737.78		0.42545	0.29071
739.2		0.40884	0.29738
740.63		0.42438	0.29535
742.05		0.42721	0.29012
743.48		0.41326	0.31222
744.9		0.41535	0.29204
746.33		0.40813	0.30323
747.75		0.41601	0.28967
749.17		0.43337	0.30472
750.6		0.42779	0.29113
752.02		0.4174	0.30036
753.45		0.41326	0.30687
754.87		0.42359	0.29053
756.3		0.42717	0.29352
757.72		0.41021	0.2887
759.14		0.42347	0.29397
760.57		0.42336	0.31286
761.99		0.40414	0.29422
763.42		0.45145	0.29105
764.84		0.4042	0.30602
766.27		0.41393	0.30828
767.69		0.43194	0.30191
769.11		0.42697	0.29507
770.54		0.43347	0.31181
771.96		0.44366	0.29589
773.39		0.43499	0.29702
774.81		0.42783	0.28759
776.24		0.43631	0.29624
777.66		0.40758	0.30978
779.08		0.41038	0.30081
780.51		0.41733	0.30032
781.93		0.41596	0.30872
783.36		0.4185	0.30947
784.78		0.43245	0.30164
786.21		0.42698	0.30647
787.63		0.43268	0.30639
789.05		0.43582	0.32153
790.48		0.41761	0.31464
791.9		0.42242	0.31699
793.33		0.42508	0.29733
794.75		0.40813	0.30881
796.18		0.42952	0.29491
797.6		0.44987	0.29239
799.02		0.42368	0.31359
800.45		0.45887	0.30752
801.87		0.40956	0.32088
803.3		0.43982	0.30729
804.72		0.44089	0.31017
806.15		0.42818	0.30628
807.57		0.43251	0.31528
808.99		0.42328	0.30285
810.42		0.44111	0.30755
811.84		0.43736	0.30306
813.27		0.43953	0.31653
814.69		0.44638	0.29688
816.12		0.43951	0.29705
817.54		0.43836	0.31302
818.96		0.43309	0.30325
820.39		0.4478	0.29347
821.81		0.4466	0.31222
823.24		0.45744	0.30673
824.66		0.43019	0.30363
826.09		0.43226	0.31891
827.51		0.42281	0.30467
828.93		0.43868	0.30322
830.36		0.41858	0.29929
831.78		0.45149	0.29856
833.21		0.43659	0.32733
834.63		0.43762	0.31706
836.06		0.45961	0.32064
837.48		0.43792	0.30815
838.9		0.43658	0.31798
840.33		0.42976	0.31359
841.75		0.44404	0.31146
843.18		0.43752	0.30108
844.6		0.4661	0.31038
846.03		0.44172	0.32489
847.45		0.41323	0.31773
848.87		0.44068	0.31719
850.3		0.43812	0.32452
851.72		0.42147	0.31344
853.15		0.45745	0.32194
854.57		0.44952	0.3213
856		0.4546	0.31369
857.42		0.44036	0.31222
858.84		0.43706	0.3143
860.27		0.44021	0.31692
861.69		0.41453	0.31757
863.12		0.44745	0.31597
864.54		0.44934	0.31175
865.97		0.44769	0.32217
867.39		0.4252	0.3215
868.81		0.44663	0.31643
870.24		0.4458	0.3191
871.66		0.43455	0.30826
873.09		0.44374	0.30762
874.51		0.43514	0.32743
875.94		0.45044	0.3318
877.36		0.45155	0.32406
878.78		0.46386	0.31375
880.21		0.46502	0.30168
881.63		0.44767	0.323
883.06		0.44605	0.31727
884.48		0.44542	0.32907
885.91		0.42624	0.3142
887.33		0.45218	0.32102
888.75		0.43799	0.31608
890.18		0.46199	0.32192
891.6		0.46509	0.30933
893.03		0.43956	0.32035
894.45		0.45947	0.31367
895.88		0.45347	0.32152
897.3		0.4454	0.3206
898.72		0.47103	0.31659
900.15		0.46231	0.32426
901.57		0.45392	0.31663
903		0.4464	0.32229
904.42		0.47052	0.31713
905.85		0.44114	0.3349
907.27		0.44879	0.32904
908.69		0.44972	0.3312
910.12		0.46612	0.30694
911.54		0.44616	0.31587
912.97		0.45995	0.32652
914.39		0.45107	0.3183
915.82		0.43832	0.33593
917.24		0.44461	0.3269
918.66		0.45574	0.33068
920.09		0.45497	0.33899
921.51		0.43714	0.32957
922.94		0.45525	0.32937
924.36		0.4452	0.32451
925.79		0.44353	0.3276
927.21		0.44962	0.32964
928.63		0.45757	0.32453
930.06		0.46586	0.32692
931.48		0.45571	0.32727
932.91		0.44909	0.33702
934.33		0.46774	0.31907
935.76		0.46042	0.33732
937.18		0.45654	0.33079
938.6		0.44522	0.32587
940.03		0.45462	0.3238
941.45		0.46152	0.32891
942.88		0.45995	0.32788
944.3		0.47087	0.32353
945.73		0.47375	0.3331
947.15		0.45831	0.32061
948.57		0.45572	0.31912
950		0.4619	0.33475
951.42		0.4597	0.33422
952.85		0.45453	0.33185
954.27		0.46826	0.33031
955.7		0.46155	0.31332
957.12		0.4487	0.32272
958.54		0.4702	0.33256
959.97		0.46287	0.32107
961.39		0.47109	0.34145
962.82		0.44974	0.33303
964.24		0.48741	0.32437
965.67		0.47202	0.34115
967.09		0.48723	0.32191
968.51		0.4847	0.32281
969.94		0.46461	0.34083
971.36		0.47518	0.32277
972.79		0.47191	0.32398
974.21		0.48131	0.33277
975.64		0.46854	0.32953
977.06		0.47473	0.33877
978.48		0.45718	0.34208
979.91		0.46788	0.32908
981.33		0.46457	0.33417
982.76		0.47133	0.33412
984.18		0.46792	0.33371
985.61		0.48141	0.32561
987.03		0.4617	0.32364
988.45		0.45501	0.3381
989.88		0.46799	0.33306
991.3		0.46013	0.3434
992.73		0.4685	0.33464
994.15		0.47521	0.33623
995.58		0.46747	0.34355
997		0.48048	0.33569
998.42		0.4693	0.34513
999.85		0.48672	0.33519
1001.3		0.4816	0.34074
1002.7		0.46134	0.33485
1004.1		0.47482	0.33278
1005.5		0.47124	0.33386
1007		0.48763	0.32464
1008.4		0.48965	0.33508
1009.8		0.46816	0.34413
1011.2		0.48114	0.35904
1012.7		0.4755	0.33893
1014.1		0.48808	0.34211
1015.5		0.46734	0.35714
1016.9		0.48783	0.33106
1018.4		0.5041	0.31952
1019.8		0.47152	0.3342
1021.2		0.46556	0.33289
1022.6		0.48679	0.33147
1024.1		0.46525	0.33906
1025.5		0.47288	0.34044
1026.9		0.48798	0.3412
1028.3		0.48771	0.33945
1029.8		0.47384	0.33747
1031.2		0.45615	0.34039
1032.6		0.51455	0.33815
1034		0.49828	0.32481
1035.5		0.48178	0.33498
1036.9		0.46933	0.32861
1038.3		0.46212	0.35977
1039.7		0.4782	0.33423
1041.2		0.47385	0.34514
1042.6		0.46012	0.33757
1044		0.49325	0.3346
1045.4		0.48471	0.34046
1046.8		0.47317	0.34928
1048.3		0.49514	0.33626
1049.7		0.46472	0.35566
1051.1		0.48254	0.35125
1052.5		0.4952	0.34384
1054		0.4733	0.34487
1055.4		0.50136	0.34123
1056.8		0.47785	0.36415
1058.2		0.48214	0.34642
1059.7		0.50962	0.35362
1061.1		0.46311	0.35292
1062.5		0.49943	0.34925
1063.9		0.46513	0.35384
1065.4		0.50408	0.33369
1066.8		0.47901	0.35035
1068.2		0.4867	0.34648
1069.6		0.47437	0.35155
1071.1		0.4935	0.32889
1072.5		0.47394	0.33738
1073.9		0.49094	0.34483
1075.3		0.49387	0.3607
1076.8		0.50131	0.35001
1078.2		0.48279	0.34335
1079.6		0.48988	0.34101
1081		0.49456	0.34805
1082.5		0.49567	0.35066
1083.9		0.49243	0.34762
1085.3		0.48239	0.3596
1086.7		0.48711	0.33428
1088.2		0.48897	0.33985
1089.6		0.48815	0.34373
1091		0.4864	0.35147
1092.4		0.46495	0.34795
1093.9		0.48811	0.36024
1095.3		0.49159	0.33895
1096.7		0.48884	0.35353
1098.1		0.52361	0.34896
1099.5		0.47502	0.34015
1101		0.49532	0.36252
1102.4		0.48304	0.35969
1103.8		0.49196	0.34941
1105.2		0.49005	0.35005
1106.7		0.51192	0.34848
1108.1		0.49714	0.34738
1109.5		0.49442	0.35419
1110.9		0.5137	0.34484
1112.4		0.48914	0.35345
1113.8		0.4871	0.36738
1115.2		0.4844	0.3501
1116.6		0.50887	0.35266
1118.1		0.50249	0.35011
1119.5		0.50455	0.35389
1120.9		0.49657	0.34972
1122.3		0.51458	0.36351
1123.8		0.49044	0.35135
1125.2		0.50535	0.35902
1126.6		0.52289	0.34536
1128		0.50749	0.35635
1129.5		0.50362	0.34141
1130.9		0.50877	0.35717
1132.3		0.49839	0.33832
1133.7		0.51376	0.35297
1135.2		0.49589	0.35875
1136.6		0.48083	0.3614
1138		0.50846	0.36528
1139.4		0.51361	0.3742
1140.9		0.50868	0.35276
1142.3		0.5076	0.36115
1143.7		0.49619	0.37006
1145.1		0.51035	0.36328
1146.5		0.50861	0.35809
1148		0.49798	0.36295
1149.4		0.50812	0.35368
1150.8		0.499	0.35688
1152.2		0.51052	0.35955
1153.7		0.49058	0.36023
1155.1		0.51084	0.36984
1156.5		0.52217	0.35395
1157.9		0.4915	0.35939
1159.4		0.48791	0.34923
1160.8		0.50932	0.36881
1162.2		0.50512	0.35739
1163.6		0.50744	0.3669
1165.1		0.48784	0.34598
1166.5		0.51281	0.33961
1167.9		0.49759	0.35197
1169.3		0.49627	0.34784
1170.8		0.50774	0.36216
1172.2		0.49731	0.36537
1173.6		0.51789	0.36227
1175		0.5209	0.36502
1176.5		0.51547	0.35946
1177.9		0.52549	0.35146
1179.3		0.49466	0.36173
1180.7		0.49503	0.35817
1182.2		0.50214	0.36852
1183.6		0.51637	0.34749
1185		0.50769	0.36535
1186.4		0.51829	0.36214
1187.9		0.4846	0.37336
1189.3		0.50292	0.36275
1190.7		0.53131	0.36611
1192.1		0.49504	0.35137
1193.6		0.4956	0.35707
1195		0.51449	0.35833
1196.4		0.50411	0.35743
1197.8		0.50213	0.36408
1199.2		0.49065	0.36429
1200.7		0.50613	0.36312
1202.1		0.52105	0.35579
1203.5		0.51056	0.35368
1204.9		0.52279	0.35091
1206.4		0.51617	0.37156
1207.8		0.49368	0.37698
1209.2		0.50048	0.37453
1210.6		0.51416	0.37565
1212.1		0.49801	0.34945
1213.5		0.5177	0.35996
1214.9		0.52092	0.36138
1216.3		0.53659	0.36964
1217.8		0.51893	0.35861
1219.2		0.51849	0.37329
1220.6		0.51028	0.36682
1222		0.5034	0.36518
1223.5		0.54531	0.36464
1224.9		0.51122	0.36884
1226.3		0.52152	0.36563
1227.7		0.48355	0.36797
1229.2		0.5255	0.36552
1230.6		0.50424	0.36763
1232		0.50533	0.37616
1233.4		0.52654	0.36008
1234.9		0.50705	0.37019
1236.3		0.5081	0.38092
1237.7		0.51263	0.36921
1239.1		0.48695	0.36911
1240.6		0.51806	0.35223
1242		0.53912	0.36641
1243.4		0.50357	0.36916
1244.8		0.52725	0.36416
1246.2		0.53653	0.37415
1247.7		0.52155	0.37872
1249.1		0.49672	0.36632
1250.5		0.52297	0.36775
1251.9		0.51086	0.37017
1253.4		0.52608	0.36654
1254.8		0.53385	0.37138
1256.2		0.52089	0.37802
1257.6		0.52366	0.37001
1259.1		0.503	0.37558
1260.5		0.51193	0.36074
1261.9		0.53627	0.39041
1263.3		0.5052	0.37567
1264.8		0.54668	0.37017
1266.2		0.51645	0.38474
1267.6		0.52864	0.36375
1269		0.52179	0.36031
1270.5		0.52068	0.37839
1271.9		0.52107	0.36431
1273.3		0.51668	0.38353
1274.7		0.52802	0.36996
1276.2		0.52441	0.37876
1277.6		0.53777	0.37326
1279		0.52743	0.36024
1280.4		0.51526	0.3888
1281.9		0.52849	0.38069
1283.3		0.53006	0.3838
1284.7		0.5129	0.37709
1286.1		0.51378	0.39304
1287.6		0.52571	0.36986
1289		0.50421	0.38536
1290.4		0.53165	0.38472
1291.8		0.53894	0.38382
1293.3		0.52293	0.37642
1294.7		0.52172	0.36959
1296.1		0.5417	0.38658
1297.5		0.56413	0.38648
1298.9		0.5187	0.37485
1300.4		0.54654	0.38259
1301.8		0.53082	0.38656
1303.2		0.53899	0.38228
1304.6		0.51295	0.37193
1306.1		0.52802	0.38127
1307.5		0.53801	0.38999
1308.9		0.51477	0.36596
1310.3		0.52285	0.37911
1311.8		0.53221	0.38726
1313.2		0.52438	0.38511
1314.6		0.53096	0.38295
1316		0.53806	0.38264
1317.5		0.5418	0.37428
1318.9		0.52027	0.3677
1320.3		0.5342	0.37646
1321.7		0.52812	0.36797
1323.2		0.51957	0.3838
1324.6		0.54092	0.37367
1326		0.52658	0.38626
1327.4		0.52881	0.38351
1328.9		0.54691	0.40145
1330.3		0.52106	0.38766
1331.7		0.54214	0.38713
1333.1		0.53707	0.38008
1334.6		0.53416	0.3734
1336		0.5199	0.38797
1337.4		0.52702	0.39581
1338.8		0.54009	0.39063
1340.3		0.51988	0.3849
1341.7		0.53966	0.3979
1343.1		0.53532	0.37933
1344.5		0.52312	0.39017
1345.9		0.52445	0.37873
1347.4		0.5343	0.39753
1348.8		0.52913	0.37524
1350.2		0.549	0.40088
1351.6		0.51865	0.39504
1353.1		0.54039	0.37419
1354.5		0.53082	0.39892
1355.9		0.5509	0.39223
1357.3		0.54593	0.37261
1358.8		0.53458	0.38362
1360.2		0.53567	0.36826
1361.6		0.55752	0.38655
1363		0.54936	0.39776
1364.5		0.55569	0.38275
1365.9		0.52377	0.38824
1367.3		0.53114	0.39019
1368.7		0.55256	0.38861
1370.2		0.52194	0.37882
1371.6		0.52055	0.39232
1373		0.54154	0.39241
1374.4		0.5492	0.38988
1375.9		0.55149	0.37266
1377.3		0.5646	0.37888
1378.7		0.53588	0.39391
1380.1		0.53712	0.3844
1381.6		0.54092	0.3927
1383		0.53409	0.38832
1384.4		0.54627	0.40031
1385.8		0.54147	0.39261
1387.3		0.54052	0.3926
1388.7		0.55566	0.3861
1390.1		0.55055	0.39146
1391.5		0.54269	0.4055
1393		0.55914	0.38546
1394.4		0.55321	0.37722
1395.8		0.55119	0.38551
1397.2		0.53833	0.37777
1398.6		0.54988	0.39094
1400.1		0.55485	0.39823
1401.5		0.54443	0.40141
1402.9		0.54742	0.39016
1404.3		0.5818	0.39678
1405.8		0.55211	0.38531
1407.2		0.50892	0.37902
1408.6		0.54896	0.40019
1410		0.5522	0.39399
1411.5		0.53781	0.39092
1412.9		0.56263	0.40305
1414.3		0.53923	0.39534
1415.7		0.55704	0.38928
1417.2		0.53306	0.38841
1418.6		0.55141	0.40198
1420		0.55112	0.40612
1421.4		0.55586	0.3787
1422.9		0.53875	0.37953
1424.3		0.56007	0.39136
1425.7		0.55005	0.39231
1427.1		0.54643	0.39517
1428.6		0.53217	0.39429
1430		0.55809	0.39648
1431.4		0.54899	0.40128
1432.8		0.55173	0.40202
1434.3		0.546	0.41536
1435.7		0.54912	0.38072
1437.1		0.56142	0.39249
1438.5		0.53001	0.37892
1440		0.56735	0.39761
1441.4		0.53004	0.38288
1442.8		0.56662	0.38529
1444.2		0.55214	0.39135
1445.6		0.54747	0.39694
1447.1		0.53649	0.40815
1448.5		0.56312	0.40092
1449.9		0.52997	0.38367
1451.3		0.56863	0.38621
1452.8		0.55305	0.39258
1454.2		0.54316	0.38593
1455.6		0.55865	0.40164
1457		0.54797	0.39657
1458.5		0.55783	0.39003
1459.9		0.55503	0.38967
1461.3		0.57871	0.40882
1462.7		0.55502	0.39755
1464.2		0.5758	0.39942
1465.6		0.55928	0.38988
1467		0.5473	0.38495
1468.4		0.55082	0.40239
1469.9		0.55242	0.39012
1471.3		0.58393	0.38945
1472.7		0.5425	0.39843
1474.1		0.5467	0.3837
1475.6		0.55855	0.40002
1477		0.55838	0.39286
1478.4		0.56131	0.40731
1479.8		0.53089	0.3944
1481.3		0.5449	0.40627
1482.7		0.55692	0.39188
1484.1		0.53431	0.38994
1485.5		0.56559	0.39344
1487		0.57083	0.39454
1488.4		0.56214	0.39138
1489.8		0.55742	0.40291
1491.2		0.54658	0.4083
1492.7		0.56679	0.39152
1494.1		0.5453	0.39121
1495.5		0.56417	0.40825
1496.9		0.55903	0.40606
1498.3		0.54758	0.40051
1499.8		0.54668	0.41198
1501.2		0.54949	0.4016
1502.6		0.55167	0.39729
1504		0.56167	0.40497
1505.5		0.55903	0.41437
1506.9		0.55411	0.41778
1508.3		0.55263	0.39146
1509.7		0.56	0.41891
1511.2		0.56947	0.40305
1512.6		0.54639	0.38932
1514		0.56887	0.40419
1515.4		0.56241	0.40094
1516.9		0.57168	0.41985
1518.3		0.55047	0.4072
1519.7		0.56655	0.41497
1521.1		0.54244	0.40889
1522.6		0.56197	0.41101
1524		0.54941	0.40907
1525.4		0.56127	0.40431
1526.8		0.57816	0.39543
1528.3		0.55564	0.41967
1529.7		0.5664	0.40523
1531.1		0.56623	0.3821
1532.5		0.5564	0.40585
1534		0.59216	0.39961
1535.4		0.58848	0.41168
1536.8		0.55715	0.39674
1538.2		0.55882	0.40831
1539.7		0.59075	0.43003
1541.1		0.57238	0.42203
1542.5		0.55251	0.40639
1543.9		0.5792	0.4089
1545.3		0.55325	0.41868
1546.8		0.57936	0.41429
1548.2		0.56068	0.41348
1549.6		0.56756	0.42944
1551		0.54453	0.41782
1552.5		0.56642	0.40565
1553.9		0.57276	0.40418
1555.3		0.57322	0.42208
1556.7		0.55717	0.41874
1558.2		0.55527	0.40237
1559.6		0.5649	0.40874
1561		0.57386	0.41784
1562.4		0.55909	0.41146
1563.9		0.56546	0.41869
1565.3		0.59041	0.41166
1566.7		0.56085	0.41754
1568.1		0.56565	0.42915
1569.6		0.56831	0.41794
1571		0.56335	0.41354
1572.4		0.57463	0.41788
1573.8		0.56749	0.40947
1575.3		0.57871	0.40995
1576.7		0.54352	0.42003
1578.1		0.55573	0.40363
1579.5		0.57201	0.40868
1581		0.57537	0.4186
1582.4		0.56361	0.41529
1583.8		0.58881	0.40034
1585.2		0.58737	0.41918
1586.7		0.55573	0.41118
1588.1		0.57552	0.40531
1589.5		0.59186	0.40518
1590.9		0.58422	0.41531
1592.4		0.56836	0.42051
1593.8		0.56868	0.40647
1595.2		0.58849	0.42656
1596.6		0.56801	0.40748
1598		0.57347	0.39307
1599.5		0.57288	0.41578
1600.9		0.58025	0.40708
1602.3		0.59073	0.40154
1603.7		0.55596	0.42172
1605.2		0.56403	0.42308
1606.6		0.5625	0.41672
1608		0.58159	0.41601
1609.4		0.56377	0.41783
1610.9		0.60393	0.41837
1612.3		0.58421	0.42192
1613.7		0.58998	0.40732
1615.1		0.57788	0.42242
1616.6		0.5679	0.42329
1618		0.58971	0.42013
1619.4		0.59128	0.42177
1620.8		0.57726	0.41355
1622.3		0.57936	0.41769
1623.7		0.58293	0.42396
1625.1		0.58804	0.42004
1626.5		0.55699	0.41405
1628		0.58365	0.42382
1629.4		0.57496	0.42075
1630.8		0.57585	0.40966
1632.2		0.57584	0.41256
1633.7		0.59741	0.4138
1635.1		0.59948	0.43395
1636.5		0.58081	0.41497
1637.9		0.58928	0.42312
1639.4		0.58169	0.43835
1640.8		0.5822	0.41931
1642.2		0.57439	0.42276
1643.6		0.57938	0.42281
1645		0.59225	0.42872
1646.5		0.58716	0.41719
1647.9		0.57808	0.42472
1649.3		0.59266	0.4137
1650.7		0.55317	0.42239
1652.2		0.57153	0.41357
1653.6		0.59862	0.42736
1655		0.58181	0.42346
1656.4		0.55854	0.43098
1657.9		0.55539	0.41069
1659.3		0.59636	0.4187
1660.7		0.57648	0.42143
1662.1		0.58736	0.42797
1663.6		0.56318	0.41426
1665		0.58804	0.41849
1666.4		0.56888	0.40546
1667.8		0.56375	0.40748
1669.3		0.5957	0.42827
1670.7		0.59653	0.42503
1672.1		0.56259	0.43636
1673.5		0.58785	0.41805
1675		0.58141	0.42945
1676.4		0.60217	0.40536
1677.8		0.57851	0.43145
1679.2		0.57348	0.43177
1680.7		0.60814	0.41845
1682.1		0.5978	0.41729
1683.5		0.5976	0.41439
1684.9		0.57458	0.42653
1686.4		0.5952	0.41919
1687.8		0.60353	0.41527
1689.2		0.58698	0.42797
1690.6		0.59746	0.42811
1692.1		0.58749	0.42388
1693.5		0.58373	0.40946
1694.9		0.58711	0.43303
1696.3		0.57333	0.41435
1697.7		0.5623	0.42813
1699.2		0.59181	0.43743
1700.6		0.57165	0.42878
1702		0.60739	0.42393
1703.4		0.57349	0.42566
1704.9		0.60224	0.43328
1706.3		0.58577	0.42078
1707.7		0.59685	0.41783
1709.1		0.5993	0.42381
1710.6		0.58373	0.42081
1712		0.58747	0.4425
1713.4		0.57088	0.42738
1714.8		0.60952	0.43088
1716.3		0.57747	0.43641
1717.7		0.58758	0.42741
1719.1		0.60843	0.4138
1720.5		0.59154	0.43255
1722		0.57821	0.43648
1723.4		0.57678	0.43057
1724.8		0.58241	0.42997
1726.2		0.57341	0.43512
1727.7		0.62286	0.43289
1729.1		0.60489	0.42967
1730.5		0.5773	0.42262
1731.9		0.59311	0.42352
1733.4		0.58804	0.44834
1734.8		0.59733	0.44362
1736.2		0.60719	0.41493
1737.6		0.59724	0.43194
1739.1		0.61104	0.43249
1740.5		0.59836	0.441
1741.9		0.60231	0.4354
1743.3		0.58766	0.4268
1744.7		0.59287	0.42265
1746.2		0.60032	0.42642
1747.6		0.58963	0.44213
1749		0.60371	0.428
1750.4		0.62401	0.44177
1751.9		0.58561	0.43997
1753.3		0.58153	0.42779
1754.7		0.58902	0.41876
1756.1		0.58921	0.42915
1757.6		0.6188	0.42991
1759		0.59529	0.43402
1760.4		0.60041	0.41963
1761.8		0.592	0.42884
1763.3		0.58573	0.42097
1764.7		0.5738	0.42276
1766.1		0.59437	0.43689
1767.5		0.57726	0.44601
1769		0.58751	0.43026
1770.4		0.60184	0.42617
1771.8		0.61542	0.41621
1773.2		0.5801	0.43199
1774.7		0.60321	0.42938
1776.1		0.59422	0.44072
1777.5		0.58775	0.43555
1778.9		0.6058	0.43527
1780.4		0.58825	0.44559
1781.8		0.60091	0.42598
1783.2		0.6061	0.43433
1784.6		0.60669	0.42428
1786.1		0.57697	0.42497
1787.5		0.58525	0.4409
1788.9		0.60361	0.44403
1790.3		0.59493	0.44308
1791.8		0.60119	0.43711
1793.2		0.59161	0.41835
1794.6		0.60744	0.44193
1796		0.61723	0.42858
1797.4		0.60134	0.43137
1798.9		0.59708	0.45835
1800.3		0.59399	0.43144
1801.7		0.61587	0.44587
1803.1		0.60602	0.45342
1804.6		0.61304	0.42916
1806		0.59625	0.41639
1807.4		0.60944	0.42669
1808.8		0.5833	0.43921
1810.3		0.61566	0.44425
1811.7		0.61542	0.43192
1813.1		0.59909	0.44452
1814.5		0.60031	0.44738
1816		0.58528	0.43905
1817.4		0.60629	0.44854
1818.8		0.58781	0.41722
1820.2		0.62021	0.43248
1821.7		0.59785	0.43804
1823.1		0.61077	0.44445
1824.5		0.61711	0.42427
1825.9		0.6002	0.44103
1827.4		0.62663	0.43558
1828.8		0.6186	0.41693
1830.2		0.59995	0.43447
1831.6		0.61074	0.43714
1833.1		0.59374	0.45829
1834.5		0.63029	0.43365
1835.9		0.59572	0.43775
1837.3		0.60453	0.43265
1838.8		0.59391	0.44185
1840.2		0.59327	0.4454
1841.6		0.59223	0.45402
1843		0.60478	0.43348
1844.4		0.63531	0.43818
1845.9		0.60623	0.43608
1847.3		0.60934	0.44091
1848.7		0.60357	0.43737
1850.1		0.59128	0.44383
1851.6		0.59858	0.44475
1853		0.60609	0.4379
1854.4		0.59783	0.44398
1855.8		0.59907	0.44122
1857.3		0.61599	0.43857
1858.7		0.61191	0.4264
1860.1		0.61926	0.44802
1861.5		0.59679	0.45801
1863		0.5859	0.44795
1864.4		0.59556	0.45173
1865.8		0.63884	0.45116
1867.2		0.60078	0.44069
1868.7		0.6083	0.43826
1870.1		0.60015	0.44702
1871.5		0.6182	0.42458
1872.9		0.61525	0.44613
1874.4		0.61658	0.43924
1875.8		0.59122	0.44412
1877.2		0.63043	0.44888
1878.6		0.6163	0.44615
1880.1		0.6004	0.43385
1881.5		0.60624	0.45793
1882.9		0.62699	0.43069
1884.3		0.63924	0.44861
1885.8		0.63601	0.43847
1887.2		0.62655	0.44969
1888.6		0.62833	0.45611
1890		0.61338	0.45408
1891.5		0.61806	0.43738
1892.9		0.61782	0.45906
1894.3		0.61241	0.44987
1895.7		0.59977	0.436
1897.1		0.60063	0.45028
1898.6		0.59849	0.44624
1900		0.59948	0.46546
1901.4		0.64094	0.43024
1902.8		0.62386	0.4592
1904.3		0.61829	0.45727
1905.7		0.61177	0.43729
1907.1		0.61661	0.43328
1908.5		0.62641	0.45831
1910		0.60867	0.43737
1911.4		0.60257	0.4384
1912.8		0.6159	0.43971
1914.2		0.63678	0.43587
1915.7		0.60315	0.43745
1917.1		0.61323	0.46308
1918.5		0.62506	0.44894
1919.9		0.61369	0.43203
1921.4		0.61029	0.42542
1922.8		0.60807	0.4356
1924.2		0.60958	0.43385
1925.6		0.60144	0.45406
1927.1		0.61195	0.45494
1928.5		0.61369	0.45
1929.9		0.61027	0.46038
1931.3		0.62354	0.46109
1932.8		0.61486	0.44802
1934.2		0.63141	0.45012
1935.6		0.61003	0.44797
1937		0.61454	0.46266
1938.5		0.60449	0.46477
1939.9		0.61493	0.46401
1941.3		0.60715	0.44539
1942.7		0.61846	0.44618
1944.1		0.61458	0.45699
1945.6		0.61823	0.46756
1947		0.61976	0.44241
1948.4		0.62339	0.4377
1949.8		0.63139	0.43873
1951.3		0.62801	0.46728
1952.7		0.6087	0.44525
1954.1		0.61319	0.43539
1955.5		0.59767	0.44331
1957		0.61268	0.46239
1958.4		0.61858	0.44887
1959.8		0.61208	0.4587
1961.2		0.61553	0.475
1962.7		0.62504	0.44389
1964.1		0.62062	0.45586
1965.5		0.62004	0.46075
1966.9		0.6323	0.4431
1968.4		0.59781	0.44454
1969.8		0.63224	0.45064
1971.2		0.6179	0.44663
1972.6		0.63502	0.46414
1974.1		0.61695	0.465
1975.5		0.62862	0.45441
1976.9		0.61718	0.44494
1978.3		0.63276	0.44364
1979.8		0.62783	0.44388
1981.2		0.61235	0.44137
1982.6		0.6217	0.44672
1984		0.62553	0.44313
1985.5		0.64214	0.45369
1986.9		0.62977	0.44542
1988.3		0.63549	0.44727
1989.7		0.61507	0.43997
1991.2		0.62004	0.44903
1992.6		0.60711	0.4633
1994		0.61314	0.45298
1995.4		0.621	0.44234
1996.8		0.62646	0.45209
1998.3		0.62161	0.46613
1999.7		0.66576	0.45535
2001.1		0.62331	0.46233
2002.5		0.60864	0.45787
2004		0.64825	0.4566
2005.4		0.62069	0.46975
2006.8		0.62845	0.44553
2008.2		0.63127	0.46062
2009.7		0.61724	0.45832
2011.1		0.60801	0.46017
2012.5		0.63522	0.4539
2013.9		0.62255	0.43846
2015.4		0.62971	0.4634
2016.8		0.6156	0.44854
2018.2		0.6199	0.43252
2019.6		0.63769	0.44053
2021.1		0.64191	0.45918
2022.5		0.60381	0.45351
2023.9		0.60767	0.46222
2025.3		0.60413	0.47955
2026.8		0.61401	0.45366
2028.2		0.63609	0.45496
2029.6		0.61864	0.45875
2031		0.62129	0.45972
2032.5		0.641	0.44272
2033.9		0.64548	0.46287
2035.3		0.60713	0.46107
2036.7		0.62796	0.44967
2038.2		0.64117	0.45624
2039.6		0.63834	0.46445
2041		0.61121	0.45367
2042.4		0.6399	0.45478
2043.8		0.62223	0.46125
2045.3		0.6528	0.4548
2046.7		0.62399	0.47669
2048.1		0.63876	0.46365
2049.5		0.61983	0.45987
2051		0.64983	0.45908
2052.4		0.62244	0.45773
2053.8		0.6086	0.44315
2055.2		0.63516	0.45243
2056.7		0.65947	0.46489
2058.1		0.62393	0.46113
2059.5		0.63256	0.47638
2060.9		0.61392	0.45114
2062.4		0.61928	0.46932
2063.8		0.63752	0.4494
2065.2		0.65078	0.46568
2066.6		0.63435	0.45002
2068.1		0.64777	0.46205
2069.5		0.61516	0.46853
2070.9		0.61176	0.45846
2072.3		0.61701	0.44348
2073.8		0.63414	0.45529
2075.2		0.63726	0.46578
2076.6		0.63632	0.4679
2078		0.61619	0.47466
2079.5		0.6453	0.45675
2080.9		0.62872	0.46495
2082.3		0.61091	0.46276
2083.7		0.62863	0.44692
2085.2		0.62397	0.45872
2086.6		0.6154	0.46589
2088		0.63416	0.46061
2089.4		0.61914	0.46819
2090.9		0.61241	0.4749
2092.3		0.6425	0.47284
2093.7		0.63315	0.45777
2095.1		0.64164	0.46213
2096.5		0.64073	0.45938
2098		0.63664	0.46354
2099.4		0.6413	0.46895
2100.8		0.63901	0.45814
2102.2		0.62746	0.45884
2103.7		0.61889	0.44806
2105.1		0.62669	0.46617
2106.5		0.6328	0.46412
2107.9		0.63861	0.46812
2109.4		0.63059	0.44928
2110.8		0.60615	0.45848
2112.2		0.64435	0.47794
2113.6		0.64376	0.46526
2115.1		0.62349	0.48172
2116.5		0.64048	0.46697
2117.9		0.64753	0.47491
2119.3		0.63129	0.47478
2120.8		0.62634	0.47119
2122.2		0.62563	0.48133
2123.6		0.6223	0.47497
2125		0.63694	0.4703
2126.5		0.63677	0.47358
2127.9		0.6315	0.44698
2129.3		0.6033	0.45449
2130.7		0.63638	0.48176
2132.2		0.63937	0.47795
2133.6		0.64423	0.47841
2135		0.63185	0.45681
2136.4		0.63315	0.46812
2137.9		0.63547	0.4713
2139.3		0.64629	0.4698
2140.7		0.65748	0.48857
2142.1		0.63828	0.45951
2143.5		0.63803	0.47769
2145		0.65309	0.46723
2146.4		0.63531	0.47247
2147.8		0.67201	0.4783
2149.2		0.63437	0.46444
2150.7		0.64479	0.47016
2152.1		0.64622	0.46537
2153.5		0.64598	0.46386
2154.9		0.6596	0.47202
2156.4		0.62943	0.47978
2157.8		0.63461	0.45712
2159.2		0.63478	0.48456
2160.6		0.64019	0.4824
2162.1		0.65482	0.47089
2163.5		0.64209	0.46336
2164.9		0.62523	0.47173
2166.3		0.63453	0.47859
2167.8		0.65066	0.46613
2169.2		0.65249	0.46868
2170.6		0.63625	0.45514
2172		0.63037	0.47862
2173.5		0.62731	0.45213
2174.9		0.62821	0.47502
2176.3		0.65054	0.46242
2177.7		0.65163	0.47819
2179.2		0.65916	0.47278
2180.6		0.63382	0.4803
2182		0.63348	0.4724
2183.4		0.64387	0.46359
2184.9		0.65126	0.47812
2186.3		0.66774	0.47364
2187.7		0.63087	0.47926
2189.1		0.6531	0.47054
2190.6		0.6419	0.47488
2192		0.62714	0.47511
2193.4		0.65145	0.47233
2194.8		0.66678	0.48078
2196.2		0.66327	0.47635
2197.7		0.65088	0.47675
2199.1		0.63655	0.47842
2200.5		0.65394	0.47455
2201.9		0.64964	0.4709
2203.4		0.64988	0.47618
2204.8		0.64632	0.47312
2206.2		0.64672	0.46639
2207.6		0.65155	0.4895
2209.1		0.66311	0.48247
2210.5		0.64571	0.47986
2211.9		0.648	0.47772
2213.3		0.62381	0.46618
2214.8		0.65915	0.46235
2216.2		0.65196	0.49102
2217.6		0.63656	0.47897
2219		0.64142	0.50298
2220.5		0.65144	0.48671
2221.9		0.62879	0.46851
2223.3		0.66062	0.48296
2224.7		0.6464	0.47364
2226.2		0.62715	0.49569
2227.6		0.65003	0.46208
2229		0.6471	0.46268
2230.4		0.64821	0.47466
2231.9		0.65976	0.48756
2233.3		0.66217	0.46951
2234.7		0.65549	0.47221
2236.1		0.66168	0.48449
2237.6		0.62892	0.49049
2239		0.64993	0.48538
2240.4		0.65794	0.4794
2241.8		0.62962	0.47661
2243.2		0.64854	0.47287
2244.7		0.62912	0.4726
2246.1		0.62556	0.47648
2247.5		0.66468	0.49912
2248.9		0.65957	0.48191
2250.4		0.65788	0.50006
2251.8		0.68314	0.48021
2253.2		0.65174	0.46545
2254.6		0.62155	0.46978
2256.1		0.64743	0.47065
2257.5		0.64597	0.46911
2258.9		0.65302	0.49266
2260.3		0.63995	0.47532
2261.8		0.65858	0.47847
2263.2		0.65103	0.48485
2264.6		0.62423	0.46594
2266		0.65052	0.46239
2267.5		0.64559	0.46761
2268.9		0.65071	0.49853
2270.3		0.6576	0.4749
2271.7		0.63914	0.46658
2273.2		0.65674	0.47579
2274.6		0.65486	0.47287
2276		0.64495	0.48543
2277.4		0.61424	0.47782
2278.9		0.6762	0.48164
2280.3		0.66709	0.48254
2281.7		0.64556	0.47855
2283.1		0.64325	0.47758
2284.6		0.65334	0.50641
2286		0.634	0.48748
2287.4		0.64451	0.47274
2288.8		0.65444	0.4805
2290.2		0.6441	0.48154
2291.7		0.64874	0.47425
2293.1		0.66664	0.48852
2294.5		0.66546	0.47165
2295.9		0.65635	0.48782
2297.4		0.64269	0.49509
2298.8		0.64885	0.48258
2300.2		0.66834	0.47987
2301.6		0.65297	0.46979
2303.1		0.67428	0.48652
2304.5		0.66411	0.48014
2305.9		0.65346	0.4829
2307.3		0.65245	0.48766
2308.8		0.68114	0.49211
2310.2		0.63679	0.49078
2311.6		0.62696	0.47465
2313		0.64418	0.48594
2314.5		0.66564	0.47416
2315.9		0.65387	0.4809
2317.3		0.64555	0.50453
2318.7		0.67131	0.49726
2320.2		0.65032	0.48814
2321.6		0.66514	0.46973
2323		0.64974	0.48569
2324.4		0.64901	0.49024
2325.9		0.66695	0.47987
2327.3		0.6757	0.47927
2328.7		0.64501	0.48909
2330.1		0.64781	0.49844
2331.6		0.65303	0.48793
2333		0.65115	0.49904
2334.4		0.6734	0.47608
2335.8		0.67882	0.48606
2337.3		0.68683	0.47198
2338.7		0.65811	0.48418
2340.1		0.67479	0.49486
2341.5		0.67335	0.47193
2342.9		0.64793	0.4831
2344.4		0.66007	0.4881
2345.8		0.65784	0.489
2347.2		0.65158	0.49144
2348.6		0.63787	0.48365
2350.1		0.65283	0.4857
2351.5		0.65925	0.49738
2352.9		0.64083	0.48638
2354.3		0.64971	0.49437
2355.8		0.67076	0.49172
2357.2		0.65854	0.49083
2358.6		0.65696	0.47144
2360		0.66991	0.48595
2361.5		0.68678	0.48354
2362.9		0.64014	0.48513
2364.3		0.66234	0.48099
2365.7		0.64395	0.47233
2367.2		0.66512	0.4907
2368.6		0.65259	0.48311
2370		0.65777	0.48377
2371.4		0.66528	0.4801
2372.9		0.68945	0.49562
2374.3		0.65549	0.48036
2375.7		0.67004	0.49134
2377.1		0.65298	0.50351
2378.6		0.65402	0.48801
2380		0.67087	0.47279
2381.4		0.67189	0.50211
2382.8		0.67074	0.5067
2384.3		0.66858	0.48221
2385.7		0.67868	0.48323
2387.1		0.64882	0.48706
2388.5		0.67194	0.49125
2389.9		0.65915	0.50388
2391.4		0.68294	0.49957
2392.8		0.66934	0.4891
2394.2		0.67008	0.48604
2395.6		0.66505	0.48959
2397.1		0.66272	0.49626
2398.5		0.66709	0.50063
2399.9		0.65596	0.50066
2401.3		0.69347	0.49846
2402.8		0.65352	0.4828
2404.2		0.65763	0.49121
2405.6		0.65186	0.48354
2407		0.67583	0.49223
2408.5		0.67976	0.49007
2409.9		0.66253	0.49316
2411.3		0.66728	0.49658
2412.7		0.63979	0.49189
2414.2		0.65221	0.49946
2415.6		0.67201	0.50061
2417		0.65073	0.48911
2418.4		0.67778	0.50427
2419.9		0.6737	0.48227
2421.3		0.68974	0.48235
2422.7		0.67207	0.4885
2424.1		0.65125	0.48507
2425.6		0.66011	0.49801
2427		0.68184	0.47986
2428.4		0.67252	0.49573
2429.8		0.65449	0.5134
2431.3		0.65726	0.5049
2432.7		0.6646	0.49853
2434.1		0.65381	0.51644
2435.5		0.6786	0.49752
2437		0.69001	0.4885
2438.4		0.6713	0.48923
2439.8		0.6679	0.48149
2441.2		0.68749	0.49371
2442.6		0.67164	0.50285
2444.1		0.66079	0.49646
2445.5		0.67695	0.48081
2446.9		0.69517	0.49677
2448.3		0.68235	0.49491
2449.8		0.68001	0.48902
2451.2		0.67827	0.48093
2452.6		0.67109	0.49664
2454		0.66257	0.49444
2455.5		0.6594	0.48536
2456.9		0.67411	0.5087
2458.3		0.66119	0.50163
2459.7		0.67126	0.48705
2461.2		0.67224	0.50292
2462.6		0.66093	0.50668
2464		0.67376	0.48555
2465.4		0.66005	0.49453
2466.9		0.66814	0.49295
2468.3		0.67399	0.52653
2469.7		0.67618	0.49009
2471.1		0.6751	0.49492
2472.6		0.68436	0.50065
2474		0.67893	0.49787
2475.4		0.66495	0.48867
2476.8		0.65829	0.48624
2478.3		0.69158	0.5093
2479.7		0.68248	0.49697
2481.1		0.69608	0.49704
2482.5		0.6873	0.49167
2484		0.66169	0.49315
2485.4		0.6716	0.49826
2486.8		0.68406	0.49944
2488.2		0.70725	0.50893
2489.6		0.66281	0.48199
2491.1		0.65034	0.4819
2492.5		0.67232	0.49039
2493.9		0.65087	0.51061
2495.3		0.66654	0.49673
2496.8		0.65444	0.51593
2498.2		0.64202	0.49596
2499.6		0.65986	0.49983
2501		0.65389	0.50685
2502.5		0.67212	0.49411
2503.9		0.66567	0.49233
2505.3		0.67888	0.49835
2506.7		0.68695	0.49305
2508.2		0.67875	0.50781
2509.6		0.6834	0.48164
2511		0.6663	0.50242
2512.4		0.68947	0.49909
2513.9		0.66284	0.49208
2515.3		0.69228	0.4977
2516.7		0.68335	0.47767
2518.1		0.65577	0.48953
2519.6		0.6573	0.50216
2521		0.6381	0.5128
2522.4		0.66951	0.50459
2523.8		0.67571	0.50444
2525.3		0.67597	0.4994
2526.7		0.70485	0.50627
2528.1		0.68314	0.49242
2529.5		0.66979	0.50035
2531		0.68463	0.49749
2532.4		0.68543	0.49862
2533.8		0.69697	0.49928
2535.2		0.65887	0.51152
2536.7		0.67755	0.49852
2538.1		0.6893	0.51105
2539.5		0.69842	0.47922
2540.9		0.69218	0.49258
2542.3		0.68566	0.50463
2543.8		0.69799	0.50645
2545.2		0.68969	0.49987
2546.6		0.68217	0.4986
2548		0.65992	0.50148
2549.5		0.68761	0.50226
2550.9		0.67546	0.51681
2552.3		0.65315	0.50791
2553.7		0.67673	0.49537
2555.2		0.69454	0.49434
2556.6		0.68413	0.49032
2558		0.67266	0.50769
2559.4		0.69003	0.50316
2560.9		0.69773	0.51374
2562.3		0.68827	0.49781
2563.7		0.66294	0.50858
2565.1		0.65973	0.50559
2566.6		0.66666	0.50748
2568		0.68942	0.50341
2569.4		0.68091	0.49524
2570.8		0.66986	0.50569
2572.3		0.63979	0.52095
2573.7		0.67052	0.50613
2575.1		0.69486	0.48808
2576.5		0.68509	0.50947
2578		0.68256	0.52108
2579.4		0.68501	0.5064
2580.8		0.68443	0.50079
2582.2		0.67532	0.50737
2583.7		0.66525	0.50599
2585.1		0.68118	0.49819
2586.5		0.69591	0.51004
2587.9		0.67927	0.50338
2589.3		0.70135	0.51162
2590.8		0.69211	0.49796
2592.2		0.66857	0.50908
2593.6		0.68121	0.50459
2595		0.66536	0.51684
2596.5		0.68547	0.52631
2597.9		0.68955	0.50948
2599.3		0.68523	0.50311
2600.7		0.66949	0.50684
2602.2		0.6673	0.48897
2603.6		0.69412	0.49475
2605		0.67071	0.51283
2606.4		0.70658	0.50095
2607.9		0.67501	0.50281
2609.3		0.67004	0.52171
2610.7		0.66937	0.50307
2612.1		0.69375	0.51661
2613.6		0.69394	0.51698
2615		0.68937	0.4976
2616.4		0.71043	0.5125
2617.8		0.69471	0.50037
2619.3		0.69158	0.5011
2620.7		0.70235	0.51516
2622.1		0.70409	0.48782
2623.5		0.67496	0.49936
2625		0.67854	0.50413
2626.4		0.67857	0.51904
2627.8		0.70083	0.51214
2629.2		0.67753	0.51792
2630.7		0.66414	0.51164
2632.1		0.68631	0.50565
2633.5		0.6781	0.49884
2634.9		0.68747	0.52235
2636.4		0.67166	0.51395
2637.8		0.68967	0.51705
2639.2		0.70038	0.51681
2640.6		0.67392	0.50212
2642		0.71266	0.50368
2643.5		0.67356	0.50348
2644.9		0.67405	0.51482
2646.3		0.677	0.5336
2647.7		0.68425	0.50913
2649.2		0.68804	0.50638
2650.6		0.67905	0.52401
2652		0.66888	0.5113
2653.4		0.67064	0.50605
2654.9		0.68655	0.50636
2656.3		0.6911	0.49034
2657.7		0.68269	0.50186
2659.1		0.67046	0.50007
2660.6		0.68126	0.53949
2662		0.67698	0.51534
2663.4		0.6979	0.50763
2664.8		0.68242	0.51998
2666.3		0.68041	0.50962
2667.7		0.6831	0.50733
2669.1		0.68056	0.51741
2670.5		0.69626	0.49676
2672		0.67738	0.50892
2673.4		0.70185	0.50567
2674.8		0.71365	0.50188
2676.2		0.66982	0.50422
2677.7		0.66097	0.50895
2679.1		0.6806	0.53405
2680.5		0.6778	0.51949
2681.9		0.68802	0.50693
2683.4		0.66911	0.53093
2684.8		0.69614	0.5206
2686.2		0.68692	0.51254
2687.6		0.69248	0.51808
2689		0.70205	0.51529
2690.5		0.65467	0.53231
2691.9		0.6962	0.53814
2693.3		0.69469	0.52707
2694.7		0.66801	0.52174
2696.2		0.70017	0.50583
2697.6		0.69778	0.53147
2699		0.69969	0.52295
2700.4		0.68088	0.49751
2701.9		0.66098	0.52629
2703.3		0.69755	0.51894
2704.7		0.66809	0.52165
2706.1		0.69403	0.5306
2707.6		0.67573	0.53102
2709		0.70963	0.52528
2710.4		0.68878	0.53438
2711.8		0.68729	0.53943
2713.3		0.68587	0.50295
2714.7		0.70379	0.51896
2716.1		0.68422	0.5148
2717.5		0.65928	0.51701
2719		0.69888	0.53324
2720.4		0.70931	0.52225
2721.8		0.68552	0.51629
2723.2		0.71615	0.52308
2724.7		0.69871	0.52424
2726.1		0.69851	0.51699
2727.5		0.69958	0.53977
2728.9		0.70016	0.50974
2730.4		0.68056	0.53773
2731.8		0.67562	0.51461
2733.2		0.70611	0.5155
2734.6		0.68036	0.50359
2736.1		0.69069	0.51133
2737.5		0.69386	0.51739
2738.9		0.69017	0.52028
2740.3		0.68788	0.51406
2741.7		0.67703	0.51391
2743.2		0.69484	0.53032
2744.6		0.67344	0.50497
2746		0.69753	0.51582
2747.4		0.72592	0.51308
2748.9		0.6945	0.52266
2750.3		0.7156	0.53098
2751.7		0.69054	0.51687
2753.1		0.70126	0.53521
2754.6		0.71121	0.49927
2756		0.70616	0.522
2757.4		0.70171	0.50984
2758.8		0.68976	0.52454
2760.3		0.69885	0.53156
2761.7		0.67874	0.5182
2763.1		0.6617	0.52701
2764.5		0.70052	0.51961
2766		0.70392	0.51773
2767.4		0.68168	0.53953
2768.8		0.69428	0.52976
2770.2		0.70997	0.53562
2771.7		0.67188	0.51907
2773.1		0.68042	0.52518
2774.5		0.68207	0.52303
2775.9		0.66324	0.5263
2777.4		0.70194	0.5159
2778.8		0.68052	0.52482
2780.2		0.69757	0.50901
2781.6		0.71378	0.52459
2783.1		0.6944	0.52529
2784.5		0.69307	0.52673
2785.9		0.69472	0.52836
2787.3		0.70832	0.51416
2788.7		0.69043	0.51948
2790.2		0.68657	0.52745
2791.6		0.67658	0.50491
2793		0.70801	0.53977
2794.4		0.69793	0.514
2795.9		0.70465	0.52643
2797.3		0.6938	0.52542
2798.7		0.70504	0.51527
2800.1		0.67531	0.53921
2801.6		0.69405	0.53406
2803		0.70395	0.51679
2804.4		0.68668	0.52463
2805.8		0.68975	0.49785
2807.3		0.68223	0.52189
2808.7		0.70083	0.53382
2810.1		0.68382	0.52036
2811.5		0.70863	0.51888
2813		0.70459	0.53316
2814.4		0.71147	0.52992
2815.8		0.68822	0.52646
2817.2		0.69398	0.54445
2818.7		0.68774	0.51569
2820.1		0.72384	0.51161
2821.5		0.67335	0.53397
2822.9		0.70338	0.51679
2824.4		0.69016	0.51877
2825.8		0.69201	0.53132
2827.2		0.69949	0.52802
2828.6		0.70075	0.51822
2830.1		0.70844	0.54158
2831.5		0.7029	0.53005
2832.9		0.71135	0.51903
[truncated: 2,955 more rows]

## Sheet: F7-FS1-D
											GSK3 inhibitor with Bafilomycin A1 effect
	Combined Dconfocal (um2s-1)	Standard Error	Percentage error			Combined Dconfocal Comparison					in HeLa Cytoplasm
0 Bafilomycin (un-treated)	0.61	0.0337654	5.51647
100nm Bafilomycin	0.59	0.0228673	3.85102
