# Supplementary material for: Reversing protonation of weakly basic drugs greatly enhances intracellular diffusion and decreases lysosomal sequestration
Source: eLife. 2024 Dec 6;13:RP97255. doi: 10.7554/eLife.97255 (PMC11623935; doi:10.7554/eLife.97255)
Supplement: Figure 7—figure supplement 2—source data 1. [file elife-97255-fig7-figsupp2-data1.xlsx]

## Sheet: F7-FS2-C
Time axis (re-adjusted)	Pre-Bleach	0 Bafilomycin (un-treated)	100nm Bafilomycin						Quinacrine with Bafilomycin A1 effect
-12.819	1					FRAP profile averaged Normalized			in HeLa Cytoplasm
-11.394	1.0057
-9.97	0.99115
-8.5457	1.0002
-7.1214	1.0061
-5.6971	1.0003
-4.2729	0.98527
-2.8486	1.0094
-1.4243	0.98186
0		0.11032	0.12815
1.4243		0.11633	0.13517
2.8486		0.128	0.14589
4.2729		0.13051	0.16136
5.6971		0.13352	0.16244
7.1214		0.1381	0.17827
8.5457		0.15406	0.16178
9.97		0.15089	0.17494
11.394		0.16683	0.18229
12.819		0.17467	0.17152
14.243		0.15641	0.1831
15.667		0.15706	0.18201
17.091		0.17415	0.19051
18.516		0.17713	0.19471
19.94		0.17272	0.20209
21.364		0.16539	0.2057
22.789		0.17386	0.20398
24.213		0.1886	0.21074
25.637		0.18585	0.20917
27.061		0.18393	0.21293
28.486		0.19186	0.20856
29.91		0.19074	0.21956
31.334		0.19424	0.22623
32.759		0.18638	0.2245
34.183		0.2044	0.22335
35.607		0.21044	0.22778
37.031		0.19633	0.22505
38.456		0.19747	0.22566
39.88		0.20929	0.228
41.304		0.204	0.24209
42.729		0.19694	0.2424
44.153		0.20813	0.24186
45.577		0.22142	0.23863
47.001		0.2251	0.26532
48.426		0.20471	0.25058
49.85		0.22719	0.25378
51.274		0.22922	0.27132
52.699		0.22078	0.2619
54.123		0.22222	0.27628
55.547		0.23929	0.26831
56.971		0.22941	0.26608
58.396		0.23178	0.26961
59.82		0.23917	0.28581
61.244		0.22709	0.27169
62.669		0.22946	0.2834
64.093		0.24039	0.28372
65.517		0.2354	0.28194
66.941		0.24198	0.30381
68.366		0.24888	0.30118
69.79		0.23943	0.28286
71.214		0.253	0.30967
72.639		0.23851	0.3046
74.063		0.25037	0.31821
75.487		0.26068	0.29334
76.911		0.23206	0.31403
78.336		0.24654	0.30599
79.76		0.26047	0.31882
81.184		0.24106	0.31078
82.609		0.25795	0.30882
84.033		0.24499	0.29058
85.457		0.25447	0.31173
86.881		0.26169	0.32089
88.306		0.26571	0.31259
89.73		0.26627	0.30539
91.154		0.26561	0.31371
92.579		0.26965	0.31335
94.003		0.28271	0.32736
95.427		0.27667	0.31705
96.851		0.2816	0.33488
98.276		0.28373	0.33498
99.7		0.26903	0.33965
101.12		0.27623	0.32357
102.55		0.28638	0.34109
103.97		0.27858	0.34773
105.4		0.28497	0.33115
106.82		0.29426	0.35044
108.25		0.29027	0.34008
109.67		0.29443	0.35185
111.09		0.28941	0.34625
112.52		0.29642	0.35758
113.94		0.29591	0.36135
115.37		0.29051	0.34171
116.79		0.29813	0.35279
118.22		0.30387	0.36373
119.64		0.29569	0.35842
121.06		0.29877	0.35465
122.49		0.30809	0.3518
123.91		0.29522	0.35529
125.34		0.29275	0.35854
126.76		0.29022	0.35654
128.19		0.29817	0.3613
129.61		0.30232	0.37758
131.03		0.30839	0.3854
132.46		0.30725	0.35541
133.88		0.30357	0.37912
135.31		0.30089	0.37612
136.73		0.31809	0.37506
138.16		0.31649	0.4001
139.58		0.31321	0.39304
141		0.32033	0.36873
142.43		0.31233	0.37806
143.85		0.31833	0.39584
145.28		0.3212	0.38238
146.7		0.325	0.38971
148.13		0.32243	0.38648
149.55		0.31421	0.39744
150.97		0.31376	0.39007
152.4		0.32151	0.39454
153.82		0.31663	0.39858
155.25		0.31319	0.40377
156.67		0.31834	0.3951
158.1		0.32671	0.40488
159.52		0.32235	0.40576
160.94		0.32133	0.42449
162.37		0.32959	0.39618
163.79		0.3328	0.39414
165.22		0.33267	0.4225
166.64		0.33637	0.40837
168.07		0.33476	0.40597
169.49		0.32546	0.42747
170.91		0.3366	0.4192
172.34		0.32883	0.40954
173.76		0.33637	0.42923
175.19		0.33474	0.40485
176.61		0.33594	0.40963
178.04		0.34347	0.43632
179.46		0.33343	0.41954
180.88		0.35106	0.42391
182.31		0.34279	0.42221
183.73		0.34722	0.43106
185.16		0.34886	0.43513
186.58		0.36292	0.43965
188.01		0.34105	0.43505
189.43		0.35249	0.42934
190.85		0.34099	0.42756
192.28		0.35872	0.43311
193.7		0.35158	0.44437
195.13		0.35101	0.44633
196.55		0.35079	0.43982
197.98		0.35979	0.42623
199.4		0.36452	0.45887
200.82		0.35869	0.45609
202.25		0.33927	0.45702
203.67		0.34974	0.45839
205.1		0.36019	0.4483
206.52		0.35985	0.44386
207.95		0.34881	0.4652
209.37		0.36275	0.43139
210.79		0.37678	0.45002
212.22		0.35517	0.43815
213.64		0.36053	0.44418
215.07		0.36026	0.44844
216.49		0.36801	0.45119
217.92		0.37111	0.44311
219.34		0.36553	0.45269
220.76		0.38132	0.4592
222.19		0.38631	0.4562
223.61		0.36502	0.45453
225.04		0.37396	0.4531
226.46		0.38668	0.46783
227.89		0.37244	0.44995
229.31		0.38766	0.47159
230.73		0.38202	0.47896
232.16		0.37555	0.46198
233.58		0.38413	0.46828
235.01		0.37262	0.46118
236.43		0.38641	0.49482
237.86		0.38332	0.48498
239.28		0.37734	0.47944
240.7		0.38423	0.46856
242.13		0.38287	0.4811
243.55		0.37162	0.47474
244.98		0.39944	0.47056
246.4		0.3753	0.51086
247.83		0.38543	0.48273
249.25		0.40927	0.48148
250.67		0.38882	0.49405
252.1		0.38519	0.49141
253.52		0.40829	0.49269
254.95		0.39243	0.49081
256.37		0.39209	0.47214
257.8		0.37777	0.49247
259.22		0.39132	0.48795
260.64		0.38805	0.49652
262.07		0.39733	0.49286
263.49		0.38943	0.49021
264.92		0.3976	0.49051
266.34		0.39446	0.49399
267.77		0.39189	0.48867
269.19		0.39263	0.49983
270.61		0.41398	0.51195
272.04		0.37869	0.49512
273.46		0.39138	0.51102
274.89		0.39468	0.49284
276.31		0.38879	0.50055
277.74		0.40569	0.5141
279.16		0.4052	0.50638
280.58		0.41231	0.50639
282.01		0.39876	0.51817
283.43		0.39865	0.5053
284.86		0.40131	0.50968
286.28		0.41459	0.50343
287.71		0.40034	0.5063
289.13		0.40066	0.49157
290.55		0.4079	0.53067
291.98		0.38608	0.51702
293.4		0.41318	0.49442
294.83		0.39745	0.49435
296.25		0.41821	0.5048
297.68		0.42211	0.51997
299.1		0.41271	0.51487
300.52		0.42723	0.51494
301.95		0.42349	0.50847
303.37		0.41034	0.50504
304.8		0.4065	0.50122
306.22		0.42109	0.53003
307.65		0.41435	0.50978
309.07		0.41684	0.51791
310.49		0.39506	0.524
311.92		0.42083	0.52117
313.34		0.42369	0.52793
314.77		0.4224	0.54685
316.19		0.41973	0.53274
317.62		0.41852	0.53206
319.04		0.41069	0.51361
320.46		0.42864	0.48472
321.89		0.4443	0.54115
323.31		0.43348	0.52649
324.74		0.4192	0.54404
326.16		0.42575	0.54409
327.59		0.42825	0.53193
329.01		0.43671	0.52986
330.43		0.42931	0.53214
331.86		0.4252	0.54817
333.28		0.43219	0.53033
334.71		0.41866	0.52956
336.13		0.44177	0.53505
337.56		0.43167	0.56464
338.98		0.43135	0.5423
340.4		0.42719	0.52895
341.83		0.42758	0.55778
343.25		0.43188	0.54244
344.68		0.42824	0.55174
346.1		0.4407	0.52929
347.53		0.43342	0.53402
348.95		0.43422	0.53103
350.37		0.41944	0.56134
351.8		0.45047	0.53731
353.22		0.4174	0.54771
354.65		0.42693	0.56184
356.07		0.43747	0.54059
357.5		0.43848	0.54175
358.92		0.43058	0.55242
360.34		0.42669	0.54252
361.77		0.43916	0.5538
363.19		0.42733	0.5457
364.62		0.45154	0.55696
366.04		0.44716	0.53984
367.47		0.43298	0.56246
368.89		0.434	0.54835
370.31		0.44509	0.5446
371.74		0.44829	0.55401
373.16		0.43173	0.56003
374.59		0.45421	0.56846
376.01		0.44338	0.55084
377.44		0.43025	0.54058
378.86		0.45027	0.56757
380.28		0.44512	0.56938
381.71		0.44943	0.55836
383.13		0.46023	0.55642
384.56		0.46083	0.56259
385.98		0.44564	0.56461
387.41		0.45904	0.55956
388.83		0.44919	0.56473
390.25		0.45302	0.56707
391.68		0.46638	0.57342
393.1		0.45876	0.58149
394.53		0.46337	0.55367
395.95		0.45254	0.58739
397.38		0.45124	0.57443
398.8		0.46083	0.57899
400.22		0.45395	0.55736
401.65		0.45149	0.56215
403.07		0.44297	0.5865
404.5		0.45147	0.53976
405.92		0.49538	0.56048
407.35		0.45816	0.56575
408.77		0.45546	0.56707
410.19		0.45559	0.55561
411.62		0.45807	0.57006
413.04		0.46002	0.57003
414.47		0.45966	0.56694
415.89		0.48078	0.57492
417.32		0.45894	0.59535
418.74		0.46166	0.57716
420.16		0.45605	0.57411
421.59		0.46521	0.57483
423.01		0.4663	0.57401
424.44		0.45188	0.57264
425.86		0.4606	0.59111
427.29		0.47177	0.57641
428.71		0.46308	0.56934
430.13		0.46462	0.56596
431.56		0.47443	0.56458
432.98		0.46395	0.5711
434.41		0.46566	0.58615
435.83		0.46746	0.5898
437.26		0.46238	0.58281
438.68		0.45634	0.59408
440.1		0.47333	0.58328
441.53		0.47797	0.57426
442.95		0.47101	0.58379
444.38		0.48	0.59111
445.8		0.46393	0.59411
447.23		0.46125	0.58106
448.65		0.46383	0.60868
450.07		0.46045	0.58941
451.5		0.47723	0.58021
452.92		0.47391	0.61106
454.35		0.4616	0.57812
455.77		0.47469	0.58996
457.2		0.48077	0.59625
458.62		0.48125	0.58271
460.04		0.46168	0.60701
461.47		0.46378	0.56211
462.89		0.47836	0.59319
464.32		0.46432	0.60672
465.74		0.47876	0.59623
467.17		0.46942	0.58821
468.59		0.46537	0.60557
470.01		0.462	0.60178
471.44		0.46468	0.61058
472.86		0.47715	0.58657
474.29		0.48225	0.59588
475.71		0.48777	0.60663
477.14		0.47849	0.58715
478.56		0.4887	0.60463
479.98		0.47689	0.59708
481.41		0.47241	0.60679
482.83		0.48019	0.60624
484.26		0.46355	0.60637
485.68		0.50129	0.58454
487.11		0.48256	0.59706
488.53		0.48672	0.59262
489.95		0.49355	0.59844
491.38		0.47893	0.60094
492.8		0.48358	0.61802
494.23		0.4719	0.60838
495.65		0.49349	0.6203
497.08		0.48564	0.58885
498.5		0.49006	0.59003
499.92		0.48403	0.60663
501.35		0.48326	0.61755
502.77		0.48352	0.61147
504.2		0.49034	0.61348
505.62		0.49735	0.60496
507.05		0.48637	0.6327
508.47		0.4856	0.61221
509.89		0.49404	0.60093
511.32		0.46565	0.61369
512.74		0.48633	0.62616
514.17		0.4912	0.58309
515.59		0.48616	0.63005
517.02		0.4761	0.63065
518.44		0.47952	0.623
519.86		0.49515	0.62284
521.29		0.49936	0.59563
522.71		0.48456	0.60256
524.14		0.4813	0.6099
525.56		0.49737	0.61138
526.99		0.4914	0.60893
528.41		0.49726	0.61094
529.83		0.49783	0.63382
531.26		0.50369	0.62414
532.68		0.51494	0.61487
534.11		0.49232	0.61773
535.53		0.48867	0.62287
536.96		0.4898	0.61828
538.38		0.49067	0.60296
539.8		0.48507	0.61599
541.23		0.50719	0.62275
542.65		0.50258	0.61799
544.08		0.49791	0.63049
545.5		0.50475	0.6291
546.93		0.49332	0.61225
548.35		0.50508	0.62785
549.77		0.50118	0.62736
551.2		0.51116	0.61597
552.62		0.50059	0.6351
554.05		0.51163	0.64172
555.47		0.50839	0.62792
556.9		0.50698	0.6205
558.32		0.49033	0.63843
559.74		0.50448	0.61151
561.17		0.49238	0.61196
562.59		0.50041	0.63561
564.02		0.50889	0.63482
565.44		0.49725	0.63636
566.87		0.49033	0.61296
568.29		0.49655	0.64153
569.71		0.49864	0.64223
571.14		0.51579	0.63397
572.56		0.5058	0.61761
573.99		0.50411	0.64315
575.41		0.49088	0.64265
576.84		0.49936	0.6494
578.26		0.49428	0.61833
579.68		0.50839	0.60954
581.11		0.49925	0.61045
582.53		0.49484	0.6379
583.96		0.51035	0.63928
585.38		0.50828	0.64007
586.81		0.51747	0.60379
588.23		0.50325	0.63042
589.65		0.50103	0.63415
591.08		0.52167	0.61662
592.5		0.50655	0.65935
593.93		0.51106	0.64404
595.35		0.50821	0.63022
596.78		0.50269	0.62282
598.2		0.50327	0.63783
599.62		0.51441	0.64811
601.05		0.51474	0.61538
602.47		0.50621	0.62486
603.9		0.50245	0.62483
605.32		0.50373	0.62171
606.75		0.51981	0.6329
608.17		0.52891	0.63901
609.59		0.50718	0.65163
611.02		0.50503	0.62611
612.44		0.51366	0.62251
613.87		0.51637	0.64955
615.29		0.5216	0.63132
616.72		0.51229	0.63599
618.14		0.52685	0.6419
619.56		0.50832	0.64478
620.99		0.51002	0.66185
622.41		0.50313	0.6561
623.84		0.50906	0.6321
625.26		0.51615	0.63835
626.69		0.51669	0.64849
628.11		0.51698	0.63606
629.53		0.5108	0.63235
630.96		0.5192	0.62697
632.38		0.51831	0.63351
633.81		0.5319	0.66746
635.23		0.51049	0.65974
636.66		0.51778	0.6541
638.08		0.52503	0.64515
639.5		0.52444	0.63862
640.93		0.53281	0.62871
642.35		0.50792	0.66351
643.78		0.51142	0.66036
645.2		0.52186	0.65014
646.63		0.50167	0.65332
648.05		0.50752	0.6526
649.47		0.5315	0.64319
650.9		0.52302	0.64786
652.32		0.53541	0.67119
653.75		0.51723	0.6242
655.17		0.52688	0.6223
656.6		0.52144	0.65699
658.02		0.52598	0.65996
659.44		0.5203	0.6396
660.87		0.51268	0.64377
662.29		0.52508	0.65941
663.72		0.53069	0.67718
665.14		0.52364	0.6607
666.57		0.52925	0.68148
667.99		0.53067	0.65904
669.41		0.53457	0.64331
670.84		0.52491	0.65629
672.26		0.53353	0.66304
673.69		0.51384	0.65012
675.11		0.52642	0.64685
676.54		0.53469	0.6573
677.96		0.53269	0.67599
679.38		0.53541	0.65731
680.81		0.52316	0.65939
682.23		0.50444	0.68209
683.66		0.52204	0.66506
685.08		0.51517	0.67619
686.51		0.51256	0.66127
687.93		0.53958	0.65678
689.35		0.54114	0.66227
690.78		0.53941	0.65795
692.2		0.51836	0.65813
693.63		0.54272	0.65605
695.05		0.52973	0.66803
696.48		0.52438	0.65064
697.9		0.52764	0.67244
699.32		0.52744	0.6687
700.75		0.53275	0.65037
702.17		0.52926	0.65602
703.6		0.545	0.66168
705.02		0.54016	0.65074
706.45		0.54362	0.66191
707.87		0.52566	0.6752
709.29		0.52472	0.6736
710.72		0.55608	0.68901
712.14		0.54047	0.67912
713.57		0.55535	0.67474
714.99		0.5457	0.66851
716.42		0.54299	0.64804
717.84		0.54324	0.68337
719.26		0.52353	0.66952
720.69		0.52841	0.6853
722.11		0.53322	0.66776
723.54		0.53066	0.67021
724.96		0.52924	0.64464
726.39		0.53766	0.65647
727.81		0.5371	0.65629
729.23		0.52952	0.6822
730.66		0.5304	0.67456
732.08		0.53772	0.66243
733.51		0.54052	0.68077
734.93		0.52492	0.67399
736.36		0.53933	0.66963
737.78		0.53042	0.67144
739.2		0.52667	0.67237
740.63		0.54579	0.68255
742.05		0.54182	0.69793
743.48		0.54939	0.68738
744.9		0.55818	0.67355
746.33		0.54168	0.65103
747.75		0.56434	0.67117
749.17		0.53454	0.66697
750.6		0.54309	0.6759
752.02		0.56637	0.66175
753.45		0.54402	0.67239
754.87		0.5327	0.67202
756.3		0.54571	0.66866
757.72		0.53931	0.68504
759.14		0.54491	0.6625
760.57		0.5421	0.66976
761.99		0.55762	0.65798
763.42		0.54169	0.65215
764.84		0.55155	0.68262
766.27		0.57278	0.68474
767.69		0.53676	0.68439
769.11		0.54268	0.66286
770.54		0.53604	0.66151
771.96		0.52936	0.70146
773.39		0.55095	0.68991
774.81		0.53062	0.6729
776.24		0.55086	0.68843
777.66		0.5549	0.68025
779.08		0.55396	0.68766
780.51		0.53348	0.66961
781.93		0.54489	0.67884
783.36		0.56075	0.69654
784.78		0.54816	0.68101
786.21		0.53898	0.67454
787.63		0.53117	0.67184
789.05		0.558	0.68192
790.48		0.54404	0.70123
791.9		0.55115	0.69003
793.33		0.55081	0.68166
794.75		0.54461	0.6851
796.18		0.54436	0.68838
797.6		0.5436	0.68017
799.02		0.54797	0.68299
800.45		0.55963	0.67042
801.87		0.54655	0.70026
803.3		0.55844	0.66837
804.72		0.52544	0.68923
806.15		0.55879	0.67109
807.57		0.56845	0.68879
808.99		0.55254	0.65083
810.42		0.54406	0.67232
811.84		0.54284	0.71003
813.27		0.55623	0.67574
814.69		0.55215	0.67964
816.12		0.54555	0.68005
817.54		0.53475	0.69292
818.96		0.55779	0.69026
820.39		0.54375	0.68406
821.81		0.54384	0.69084
823.24		0.55645	0.66919
824.66		0.56583	0.6677
826.09		0.56991	0.68292
827.51		0.53921	0.67928
828.93		0.55907	0.6746
830.36		0.55181	0.67989
831.78		0.56146	0.67493
833.21		0.54806	0.69261
834.63		0.559	0.69876
836.06		0.56066	0.68844
837.48		0.54245	0.68453
838.9		0.53887	0.69388
840.33		0.55129	0.67851
841.75		0.55295	0.68107
843.18		0.56659	0.70056
844.6		0.55286	0.69155
846.03		0.57524	0.67873
847.45		0.55381	0.69575
848.87		0.56712	0.68679
850.3		0.56491	0.71123
851.72		0.55565	0.68649
853.15		0.56993	0.67159
854.57		0.55727	0.69417
856		0.55064	0.68093
857.42		0.55918	0.70478
858.84		0.56079	0.69943
860.27		0.55308	0.68707
861.69		0.56043	0.69387
863.12		0.5403	0.67782
864.54		0.5689	0.68884
865.97		0.5663	0.68999
867.39		0.55009	0.70133
868.81		0.56006	0.68016
870.24		0.55623	0.69699
871.66		0.56062	0.70713
873.09		0.55525	0.70402
874.51		0.55422	0.70022
875.94		0.55695	0.71012
877.36		0.56321	0.7022
878.78		0.57014	0.71277
880.21		0.57224	0.69789
881.63		0.56015	0.69216
883.06		0.58394	0.68938
884.48		0.56121	0.69844
885.91		0.57088	0.70055
887.33		0.58312	0.68936
888.75		0.55245	0.70557
890.18		0.57446	0.67452
891.6		0.55907	0.7064
893.03		0.55217	0.67993
894.45		0.55994	0.70026
895.88		0.56449	0.68821
897.3		0.55279	0.6907
898.72		0.55349	0.71759
900.15		0.5614	0.7159
901.57		0.56496	0.68728
903		0.554	0.71101
904.42		0.56348	0.69396
905.85		0.56322	0.68141
907.27		0.56138	0.71543
908.69		0.54965	0.70019
910.12		0.56375	0.70337
911.54		0.56661	0.7034
912.97		0.55821	0.7189
914.39		0.56706	0.68709
915.82		0.56949	0.68139
917.24		0.59073	0.70912
918.66		0.57879	0.68075
920.09		0.55651	0.71009
921.51		0.57192	0.70414
922.94		0.55964	0.67705
924.36		0.5646	0.69843
925.79		0.56972	0.69913
927.21		0.57628	0.70661
928.63		0.56717	0.69307
930.06		0.57917	0.71901
931.48		0.56193	0.69129
932.91		0.57366	0.70769
934.33		0.58102	0.70763
935.76		0.54843	0.70471
937.18		0.58382	0.68788
938.6		0.56411	0.69279
940.03		0.57147	0.73406
941.45		0.56777	0.70594
942.88		0.54669	0.70659
944.3		0.56852	0.71436
945.73		0.5769	0.6928
947.15		0.56726	0.67733
948.57		0.57554	0.69336
950		0.57925	0.70532
951.42		0.5537	0.67673
952.85		0.56422	0.71018
954.27		0.57875	0.71793
955.7		0.596	0.69122
957.12		0.58166	0.7479
958.54		0.57427	0.72544
959.97		0.55382	0.70146
961.39		0.56939	0.70493
962.82		0.58375	0.72584
964.24		0.56778	0.69835
965.67		0.57708	0.70557
967.09		0.58256	0.68846
968.51		0.58415	0.71501
969.94		0.58159	0.69375
971.36		0.58652	0.70365
972.79		0.58727	0.71026
974.21		0.57733	0.69753
975.64		0.56498	0.71369
977.06		0.57048	0.70131
978.48		0.56718	0.70916
979.91		0.55856	0.72772
981.33		0.58477	0.73021
982.76		0.56067	0.72423
984.18		0.57489	0.70128
985.61		0.56635	0.70699
987.03		0.57333	0.72275
988.45		0.57733	0.71806
989.88		0.577	0.71902
991.3		0.5772	0.7224
992.73		0.57524	0.72013
994.15		0.56746	0.72558
995.58		0.5898	0.68719
997		0.57793	0.71267
998.42		0.55797	0.70412
999.85		0.57553	0.70731
1001.3		0.58947	0.68877
1002.7		0.59121	0.72039
1004.1		0.58318	0.70569
1005.5		0.58394	0.72339
1007		0.59782	0.7311
1008.4		0.57402	0.71674
1009.8		0.57125	0.69933
1011.2		0.58152	0.71888
1012.7		0.57818	0.71244
1014.1		0.56834	0.72267
1015.5		0.58729	0.72065
1016.9		0.57254	0.72816
1018.4		0.56842	0.71139
1019.8		0.57059	0.73713
1021.2		0.57192	0.69409
1022.6		0.57568	0.73234
1024.1		0.59102	0.71637
1025.5		0.56683	0.73196
1026.9		0.60117	0.73469
1028.3		0.57974	0.72747
1029.8		0.59376	0.69742
1031.2		0.58863	0.72641
1032.6		0.57525	0.71707
1034		0.57629	0.71926
1035.5		0.58421	0.72251
1036.9		0.56462	0.70875
1038.3		0.58396	0.72839
1039.7		0.59191	0.73628
1041.2		0.58805	0.73174
1042.6		0.57937	0.70607
1044		0.5845	0.7246
1045.4		0.58399	0.72197
1046.8		0.5771	0.7366
1048.3		0.5792	0.7255
1049.7		0.57675	0.72802
1051.1		0.57835	0.69441
1052.5		0.57304	0.72034
1054		0.59781	0.70511
1055.4		0.5628	0.70892
1056.8		0.58446	0.72738
1058.2		0.56798	0.71606
1059.7		0.58704	0.71211
1061.1		0.59116	0.70625
1062.5		0.59138	0.71754
1063.9		0.56416	0.72456
1065.4		0.60071	0.71692
1066.8		0.56158	0.71072
1068.2		0.58492	0.71352
1069.6		0.59308	0.73284
1071.1		0.58456	0.72635
1072.5		0.58747	0.69309
1073.9		0.60121	0.72098
1075.3		0.58514	0.69892
1076.8		0.59086	0.7138
1078.2		0.58538	0.72281
1079.6		0.57952	0.72263
1081		0.58999	0.71686
1082.5		0.59154	0.71582
1083.9		0.59031	0.72651
1085.3		0.59401	0.72797
1086.7		0.5769	0.72275
1088.2		0.58189	0.72841
1089.6		0.59716	0.73
1091		0.5972	0.72118
1092.4		0.58952	0.72562
1093.9		0.58839	0.72249
1095.3		0.59382	0.74539
1096.7		0.60436	0.72387
1098.1		0.583	0.71434
1099.5		0.5862	0.7094
1101		0.58219	0.71847
1102.4		0.57286	0.73255
1103.8		0.59185	0.74086
1105.2		0.60043	0.73834
1106.7		0.58792	0.73753
1108.1		0.59982	0.72355
1109.5		0.59581	0.73781
1110.9		0.58929	0.73244
1112.4		0.59301	0.74096
1113.8		0.59124	0.71233
1115.2		0.59032	0.73456
1116.6		0.59187	0.73325
1118.1		0.59141	0.71304
1119.5		0.60303	0.72061
1120.9		0.57863	0.74432
1122.3		0.59924	0.71273
1123.8		0.58971	0.72369
1125.2		0.60383	0.73514
1126.6		0.60859	0.72354
1128		0.59994	0.72412
1129.5		0.58343	0.73252
1130.9		0.58485	0.75059
1132.3		0.59464	0.73034
1133.7		0.59902	0.70494
1135.2		0.58594	0.7137
1136.6		0.595	0.73802
1138		0.59506	0.71664
1139.4		0.6057	0.74042
1140.9		0.57243	0.71093
1142.3		0.58938	0.70492
1143.7		0.59302	0.72878
1145.1		0.59285	0.71575
1146.5		0.59421	0.70354
1148		0.59793	0.7135
1149.4		0.58355	0.73731
1150.8		0.60189	0.73776
1152.2		0.58739	0.73489
1153.7		0.59626	0.7206
1155.1		0.60799	0.73766
1156.5		0.58376	0.70288
1157.9		0.5992	0.71576
1159.4		0.59693	0.73941
1160.8		0.60846	0.74475
1162.2		0.5795	0.73305
1163.6		0.59844	0.74466
1165.1		0.60667	0.74748
1166.5		0.58884	0.7744
1167.9		0.61383	0.72266
1169.3		0.60374	0.73408
1170.8		0.59968	0.74061
1172.2		0.6034	0.71656
1173.6		0.5943	0.76198
1175		0.59644	0.71885
1176.5		0.59475	0.72604
1177.9		0.58599	0.73322
1179.3		0.59404	0.70756
1180.7		0.59127	0.73069
1182.2		0.58438	0.72991
1183.6		0.5749	0.73251
1185		0.60944	0.74257
1186.4		0.59431	0.73168
1187.9		0.62151	0.73596
1189.3		0.60681	0.73491
1190.7		0.60033	0.72106
1192.1		0.61344	0.72801
1193.6		0.6084	0.71165
1195		0.59394	0.74773
1196.4		0.60325	0.74075
1197.8		0.61917	0.72214
1199.2		0.58814	0.73887
1200.7		0.58557	0.75372
1202.1		0.61056	0.73927
1203.5		0.59544	0.73882
1204.9		0.60896	0.74695
1206.4		0.59367	0.73539
1207.8		0.61537	0.7499
1209.2		0.59828	0.73749
1210.6		0.59359	0.74269
1212.1		0.59808	0.7418
1213.5		0.60771	0.71944
1214.9		0.5928	0.76014
1216.3		0.62248	0.75522
1217.8		0.5969	0.74113
1219.2		0.62379	0.73817
1220.6		0.60431	0.74544
1222		0.5936	0.7245
1223.5		0.61272	0.73396
1224.9		0.59595	0.74069
1226.3		0.59105	0.76138
1227.7		0.59804	0.73766
1229.2		0.60209	0.72825
1230.6		0.57787	0.72366
1232		0.60499	0.74142
1233.4		0.61183	0.74482
1234.9		0.60248	0.74565
1236.3		0.60989	0.73658
1237.7		0.61127	0.75945
1239.1		0.60838	0.74536
1240.6		0.60468	0.75065
1242		0.60146	0.74196
1243.4		0.58277	0.74215
1244.8		0.59627	0.74286
1246.2		0.6082	0.73043
1247.7		0.60704	0.7329
1249.1		0.60585	0.73548
1250.5		0.61113	0.73709
1251.9		0.62825	0.73435
1253.4		0.59521	0.72465
1254.8		0.60266	0.73736
1256.2		0.60968	0.73449
1257.6		0.59563	0.72931
1259.1		0.61343	0.74725
1260.5		0.60712	0.75147
1261.9		0.58942	0.74014
1263.3		0.59785	0.75864
1264.8		0.60746	0.75625
1266.2		0.59572	0.73808
1267.6		0.59838	0.73128
1269		0.59255	0.72313
1270.5		0.59386	0.75499
1271.9		0.60705	0.71663
1273.3		0.61487	0.73656
1274.7		0.61516	0.75556
1276.2		0.59493	0.73474
1277.6		0.60936	0.74176
1279		0.59657	0.76176
1280.4		0.60331	0.74473
1281.9		0.61566	0.7277
1283.3		0.60563	0.74839
1284.7		0.61902	0.72301
1286.1		0.60002	0.75047
1287.6		0.59951	0.76722
1289		0.63993	0.74323
1290.4		0.61734	0.75428
1291.8		0.60968	0.74413
1293.3		0.61789	0.7548
1294.7		0.61169	0.72362
1296.1		0.62928	0.74494
1297.5		0.60001	0.73755
1298.9		0.61141	0.75887
1300.4		0.61339	0.77612
1301.8		0.61005	0.73853
1303.2		0.61883	0.74541
1304.6		0.59122	0.74664
1306.1		0.59242	0.75832
1307.5		0.62665	0.73527
1308.9		0.61327	0.71685
1310.3		0.61982	0.74936
1311.8		0.60023	0.75054
1313.2		0.60966	0.77331
1314.6		0.61642	0.71894
1316		0.60299	0.73494
1317.5		0.59891	0.75531
1318.9		0.61815	0.74325
1320.3		0.63521	0.75603
1321.7		0.60893	0.76647
1323.2		0.61009	0.7431
1324.6		0.62186	0.77704
1326		0.62792	0.7557
1327.4		0.61791	0.76338
1328.9		0.60885	0.74495
1330.3		0.60891	0.74317
1331.7		0.62512	0.75712
1333.1		0.62274	0.74023
1334.6		0.61011	0.76262
1336		0.61562	0.76616
1337.4		0.61449	0.73841
1338.8		0.61521	0.76752
1340.3		0.62531	0.75439
1341.7		0.61	0.7474
1343.1		0.61547	0.74171
1344.5		0.61038	0.75101
1345.9		0.60819	0.75043
1347.4		0.62205	0.75345
1348.8		0.60079	0.74548
1350.2		0.6156	0.74517
1351.6		0.61021	0.75455
1353.1		0.62256	0.74485
1354.5		0.62901	0.74691
1355.9		0.6139	0.74394
1357.3		0.61746	0.75813
1358.8		0.6145	0.76056
1360.2		0.60572	0.74467
1361.6		0.61222	0.74329
1363		0.60891	0.74322
1364.5		0.61488	0.74861
1365.9		0.63081	0.74463
1367.3		0.62331	0.74476
1368.7		0.62027	0.75095
1370.2		0.6104	0.74777
1371.6		0.60916	0.73388
1373		0.60703	0.77078
1374.4		0.59646	0.76544
1375.9		0.61163	0.75493
1377.3		0.6119	0.72581
1378.7		0.63382	0.7478
1380.1		0.61817	0.71629
1381.6		0.60592	0.76172
1383		0.60908	0.75116
1384.4		0.61994	0.7356
1385.8		0.61779	0.76423
1387.3		0.62044	0.75287
1388.7		0.60908	0.74699
1390.1		0.61086	0.74355
1391.5		0.59712	0.74548
1393		0.61244	0.75159
1394.4		0.63103	0.74152
1395.8		0.61853	0.71781
1397.2		0.61873	0.74609
1398.6		0.65758	0.76073
1400.1		0.63191	0.75141
1401.5		0.60926	0.73857
1402.9		0.62592	0.7564
1404.3		0.61889	0.74679
1405.8		0.61766	0.78011
1407.2		0.62111	0.73852
1408.6		0.61953	0.76174
1410		0.62056	0.74029
1411.5		0.62006	0.76544
1412.9		0.61534	0.75053
1414.3		0.62397	0.74202
1415.7		0.61791	0.75932
1417.2		0.61725	0.76846
1418.6		0.61343	0.76803
1420		0.63702	0.75254
1421.4		0.62152	0.77013
1422.9		0.64537	0.73304
1424.3		0.61582	0.74017
1425.7		0.63201	0.74879
1427.1		0.60491	0.7629
1428.6		0.61454	0.74635
1430		0.63284	0.71981
1431.4		0.62802	0.75023
1432.8		0.60634	0.77589
1434.3		0.60632	0.75125
1435.7		0.60045	0.76342
1437.1		0.64244	0.78119
1438.5		0.62387	0.74353
1440		0.6238	0.7431
1441.4		0.62536	0.75057
1442.8		0.63856	0.76655
1444.2		0.63683	0.76475
1445.6		0.61551	0.75807
1447.1		0.62399	0.75095
1448.5		0.62756	0.76023
1449.9		0.61707	0.75883
1451.3		0.6122	0.73718
1452.8		0.60482	0.77416
1454.2		0.61308	0.75129
1455.6		0.62325	0.76967
1457		0.62972	0.76225
1458.5		0.61823	0.75678
1459.9		0.63752	0.75073
1461.3		0.63553	0.74728
1462.7		0.61813	0.7789
1464.2		0.60983	0.74825
1465.6		0.60239	0.75997
1467		0.63207	0.76955
1468.4		0.62247	0.76169
1469.9		0.60561	0.72517
1471.3		0.63533	0.75283
1472.7		0.64138	0.75903
1474.1		0.61261	0.76191
1475.6		0.61282	0.7532
1477		0.62829	0.76694
1478.4		0.62263	0.74885
1479.8		0.61579	0.76663
1481.3		0.62839	0.77999
1482.7		0.61745	0.74227
1484.1		0.6061	0.73953
1485.5		0.61228	0.75978
1487		0.63168	0.76032
1488.4		0.62075	0.75205
1489.8		0.6329	0.76539
1491.2		0.61456	0.75758
1492.7		0.61012	0.76004
1494.1		0.62878	0.75982
1495.5		0.61846	0.76764
1496.9		0.60606	0.76582
1498.3		0.65622	0.76183
1499.8		0.63003	0.76256
1501.2		0.66106	0.75526
1502.6		0.61576	0.76047
1504		0.62306	0.7655
1505.5		0.63594	0.76836
1506.9		0.62666	0.7615
1508.3		0.6313	0.75182
1509.7		0.62645	0.75323
1511.2		0.63847	0.75655
1512.6		0.61831	0.77208
1514		0.63342	0.76827
1515.4		0.61718	0.74287
1516.9		0.61734	0.76452
1518.3		0.61818	0.75792
1519.7		0.62138	0.76121
1521.1		0.62078	0.7712
1522.6		0.61704	0.76924
1524		0.63264	0.76592
1525.4		0.62778	0.77505
1526.8		0.6297	0.77111
1528.3		0.61383	0.76548
1529.7		0.63676	0.77726
1531.1		0.63595	0.75286
1532.5		0.62893	0.7608
1534		0.64216	0.76691
1535.4		0.60934	0.74717
1536.8		0.62785	0.75532
1538.2		0.6276	0.76613
1539.7		0.62083	0.77978
1541.1		0.61756	0.77407
1542.5		0.61751	0.75138
1543.9		0.62556	0.77599
1545.3		0.62722	0.79261
1546.8		0.63612	0.77066
1548.2		0.61295	0.77234
1549.6		0.64154	0.79774
1551		0.63554	0.78191
1552.5		0.6216	0.76142
1553.9		0.63119	0.76583
1555.3		0.63663	0.767
1556.7		0.62048	0.76019
1558.2		0.63299	0.78061
1559.6		0.64286	0.77025
1561		0.63473	0.75496
1562.4		0.63006	0.79324
1563.9		0.62731	0.76415
1565.3		0.62048	0.76447
1566.7		0.62097	0.77198
1568.1		0.61384	0.77205
1569.6		0.64824	0.78029
1571		0.61445	0.77789
1572.4		0.60964	0.74202
1573.8		0.64987	0.7759
1575.3		0.63357	0.75321
1576.7		0.63473	0.76208
1578.1		0.62497	0.74502
1579.5		0.61475	0.74982
1581		0.6443	0.75674
1582.4		0.63389	0.76646
1583.8		0.65566	0.77805
1585.2		0.63625	0.78506
1586.7		0.63422	0.75688
1588.1		0.63446	0.76638
1589.5		0.6366	0.77043
1590.9		0.63398	0.75215
1592.4		0.61952	0.76798
1593.8		0.61321	0.7833
1595.2		0.64819	0.75235
1596.6		0.62019	0.76364
1598		0.63176	0.7835
1599.5		0.63232	0.77002
1600.9		0.63265	0.77004
1602.3		0.63252	0.76533
1603.7		0.61557	0.78899
1605.2		0.62845	0.78275
1606.6		0.62737	0.76214
1608		0.64467	0.75474
1609.4		0.63617	0.75215
1610.9		0.6206	0.76012
1612.3		0.64194	0.77159
1613.7		0.62967	0.78295
1615.1		0.63579	0.76185
1616.6		0.6422	0.76953
1618		0.63507	0.75905
1619.4		0.62514	0.75647
1620.8		0.61961	0.76349
1622.3		0.61505	0.77197
1623.7		0.63862	0.76621
1625.1		0.64557	0.7715
1626.5		0.64163	0.75789
1628		0.62498	0.7735
1629.4		0.62766	0.75874
1630.8		0.6428	0.75752
1632.2		0.63287	0.79815
1633.7		0.6408	0.77445
1635.1		0.63054	0.76675
1636.5		0.64874	0.74694
1637.9		0.63902	0.79426
1639.4		0.65642	0.78578
1640.8		0.64988	0.76823
1642.2		0.64654	0.7597
1643.6		0.63064	0.74517
1645		0.63937	0.77636
1646.5		0.65536	0.76012
1647.9		0.64067	0.76603
1649.3		0.63791	0.76028
1650.7		0.62635	0.75463
1652.2		0.63527	0.76232
1653.6		0.63314	0.78314
1655		0.6342	0.75697
1656.4		0.62146	0.79418
1657.9		0.65321	0.7707
1659.3		0.63566	0.77864
1660.7		0.64939	0.75044
1662.1		0.62666	0.75673
1663.6		0.64403	0.77337
1665		0.63189	0.78484
1666.4		0.6257	0.77975
1667.8		0.6356	0.77615
1669.3		0.65254	0.77326
1670.7		0.64816	0.78066
1672.1		0.64537	0.7618
1673.5		0.62231	0.75613
1675		0.64022	0.78891
1676.4		0.65249	0.7991
1677.8		0.63161	0.80391
1679.2		0.63535	0.7735
1680.7		0.64265	0.75861
1682.1		0.64092	0.76897
1683.5		0.64128	0.77516
1684.9		0.61305	0.78801
1686.4		0.62839	0.76758
1687.8		0.64469	0.78957
1689.2		0.6374	0.78685
1690.6		0.62606	0.77368
1692.1		0.64637	0.77211
1693.5		0.64533	0.77764
1694.9		0.64227	0.77883
1696.3		0.63661	0.77123
1697.7		0.64567	0.75132
1699.2		0.63568	0.78049
1700.6		0.64119	0.75618
1702		0.62523	0.78187
1703.4		0.65887	0.77317
1704.9		0.62401	0.76371
1706.3		0.62715	0.78875
1707.7		0.63501	0.77901
1709.1		0.65164	0.77066
1710.6		0.63336	0.77095
1712		0.64437	0.76397
1713.4		0.63891	0.76905
1714.8		0.64089	0.77329
1716.3		0.63638	0.76779
1717.7		0.64131	0.78908
1719.1		0.63454	0.77346
1720.5		0.62992	0.78628
1722		0.64154	0.79499
1723.4		0.63671	0.7943
1724.8		0.64383	0.78137
1726.2		0.64429	0.78158
1727.7		0.64269	0.78914
1729.1		0.62065	0.75468
1730.5		0.64887	0.74298
1731.9		0.65534	0.79557
1733.4		0.65333	0.78894
1734.8		0.62937	0.76961
1736.2		0.65788	0.77706
1737.6		0.66316	0.74969
1739.1		0.63114	0.75469
1740.5		0.64647	0.76735
1741.9		0.65968	0.7822
1743.3		0.65402	0.78419
1744.7		0.63169	0.7732
1746.2		0.63372	0.77687
1747.6		0.64112	0.76657
1749		0.63645	0.75742
1750.4		0.63675	0.75632
1751.9		0.64527	0.75756
1753.3		0.63629	0.7833
1754.7		0.64529	0.78649
1756.1		0.66029	0.7624
1757.6		0.62669	0.77243
1759		0.65191	0.77776
1760.4		0.64897	0.77385
1761.8		0.6498	0.78142
1763.3		0.64268	0.7834
1764.7		0.64843	0.76504
1766.1		0.64382	0.78486
1767.5		0.64544	0.76495
1769		0.64347	0.75912
1770.4		0.62672	0.76693
1771.8		0.6346	0.77358
1773.2		0.64678	0.75529
1774.7		0.6371	0.76932
1776.1		0.63809	0.76223
1777.5		0.6389	0.77334
1778.9		0.66394	0.7844
1780.4		0.64963	0.78406
1781.8		0.65783	0.78033
1783.2		0.65034	0.79859
1784.6		0.64482	0.80359
1786.1		0.64438	0.78297
1787.5		0.64804	0.77843
1788.9		0.65466	0.77357
1790.3		0.65854	0.77624
1791.8		0.66376	0.75829
1793.2		0.66586	0.77963
1794.6		0.65602	0.7659
1796		0.63691	0.78735
1797.4		0.63752	0.79036
1798.9		0.64721	0.78162
1800.3		0.65054	0.78726
1801.7		0.66261	0.77868
1803.1		0.6494	0.77426
1804.6		0.64516	0.76918
1806		0.64044	0.7817
1807.4		0.64836	0.7899
1808.8		0.64292	0.77626
1810.3		0.64411	0.76947
1811.7		0.64493	0.776
1813.1		0.63609	0.78838
1814.5		0.64288	0.77299
1816		0.66006	0.79209
1817.4		0.63049	0.78463
1818.8		0.64419	0.78214
1820.2		0.6628	0.76239
1821.7		0.6541	0.76912
1823.1		0.63063	0.787
1824.5		0.64413	0.78039
1825.9		0.64235	0.77217
1827.4		0.63943	0.79328
1828.8		0.65517	0.78727
1830.2		0.65625	0.78382
1831.6		0.65648	0.80475
1833.1		0.66698	0.7966
1834.5		0.65264	0.77419
1835.9		0.65386	0.77961
1837.3		0.66435	0.77356
1838.8		0.65585	0.78255
1840.2		0.66107	0.77423
1841.6		0.65321	0.79288
1843		0.63554	0.80627
1844.4		0.65396	0.77124
1845.9		0.6495	0.80172
1847.3		0.64967	0.7864
1848.7		0.66175	0.76208
1850.1		0.66184	0.77523
1851.6		0.66336	0.78309
1853		0.62883	0.78383
1854.4		0.65185	0.79064
1855.8		0.6546	0.77635
1857.3		0.67389	0.78169
1858.7		0.66251	0.76715
1860.1		0.65367	0.7668
1861.5		0.63381	0.77467
1863		0.63484	0.78017
1864.4		0.6424	0.79741
1865.8		0.64735	0.78906
1867.2		0.6447	0.77581
1868.7		0.66262	0.75174
1870.1		0.64743	0.77634
1871.5		0.65895	0.78347
1872.9		0.63556	0.77694
1874.4		0.65282	0.77346
1875.8		0.64805	0.76054
1877.2		0.65729	0.75962
1878.6		0.66008	0.8019
1880.1		0.64661	0.77862
1881.5		0.63983	0.79527
1882.9		0.64489	0.80614
1884.3		0.65265	0.79104
1885.8		0.64324	0.77772
1887.2		0.65738	0.78044
1888.6		0.6435	0.77636
1890		0.63524	0.80231
1891.5		0.64982	0.76642
1892.9		0.67452	0.7799
1894.3		0.65292	0.77329
1895.7		0.63552	0.78913
1897.1		0.65953	0.77432
1898.6		0.6606	0.78679
1900		0.67672	0.77667
1901.4		0.66649	0.77097
1902.8		0.6611	0.79362
1904.3		0.65404	0.77379
1905.7		0.65729	0.76701
1907.1		0.67034	0.7848
1908.5		0.6499	0.79896
1910		0.6728	0.75356
1911.4		0.64502	0.78289
1912.8		0.65109	0.78462
1914.2		0.64565	0.78874
1915.7		0.65345	0.80041
1917.1		0.66355	0.77465
1918.5		0.68077	0.76979
1919.9		0.65907	0.78495
1921.4		0.65191	0.79053
1922.8		0.64932	0.74749
1924.2		0.65958	0.77721
1925.6		0.65049	0.76932
1927.1		0.66487	0.81192
1928.5		0.64295	0.79486
1929.9		0.65208	0.8122
1931.3		0.65101	0.79706
1932.8		0.6632	0.78883
1934.2		0.65066	0.80472
1935.6		0.67856	0.79281
1937		0.63406	0.7672
1938.5		0.64953	0.79068
1939.9		0.64122	0.79552
1941.3		0.65558	0.79296
1942.7		0.66224	0.78493
1944.1		0.6446	0.80829
1945.6		0.64861	0.77094
1947		0.67538	0.75761
1948.4		0.65913	0.76768
1949.8		0.64682	0.78033
1951.3		0.65744	0.77013
1952.7		0.64103	0.79704
1954.1		0.65421	0.77903
1955.5		0.6606	0.76212
1957		0.67612	0.79561
1958.4		0.67351	0.8143
1959.8		0.67161	0.77186
1961.2		0.64702	0.7789
1962.7		0.6808	0.78039
1964.1		0.63518	0.78033
1965.5		0.67198	0.79161
1966.9		0.66798	0.76903
1968.4		0.66388	0.78322
1969.8		0.6499	0.7976
1971.2		0.64942	0.7942
1972.6		0.65502	0.78899
1974.1		0.66151	0.79386
1975.5		0.65784	0.80228
1976.9		0.65754	0.80788
1978.3		0.67058	0.78749
1979.8		0.6741	0.78656
1981.2		0.65815	0.81202
1982.6		0.66329	0.79396
1984		0.64567	0.77996
1985.5		0.6678	0.80963
1986.9		0.66864	0.78735
1988.3		0.66201	0.7846
1989.7		0.65399	0.76934
1991.2		0.65426	0.79511
1992.6		0.67744	0.78338
1994		0.67589	0.77895
1995.4		0.67298	0.78545
1996.8		0.65658	0.79125
1998.3		0.65539	0.78813
1999.7		0.6701	0.77872
2001.1		0.66954	0.80899
2002.5		0.65513	0.8243
2004		0.63871	0.79783
2005.4		0.65269	0.80922
2006.8		0.65511	0.78999
2008.2		0.65154	0.81184
2009.7		0.64301	0.77381
2011.1		0.66314	0.79778
2012.5		0.6631	0.80212
2013.9		0.66318	0.77958
2015.4		0.653	0.79123
2016.8		0.66401	0.79042
2018.2		0.66227	0.79984
2019.6		0.65114	0.80563
2021.1		0.66914	0.77663
2022.5		0.65754	0.76432
2023.9		0.65787	0.77344
2025.3		0.63893	0.78091
2026.8		0.6637	0.77478
2028.2		0.63725	0.78866
2029.6		0.67395	0.78744
2031		0.66723	0.79556
2032.5		0.64971	0.79879
2033.9		0.66213	0.78864
2035.3		0.65357	0.79264
2036.7		0.64457	0.80634
2038.2		0.66301	0.79156
2039.6		0.66146	0.78789
2041		0.65532	0.76743
2042.4		0.67393	0.7946
2043.8		0.67209	0.78575
2045.3		0.65513	0.77952
2046.7		0.67759	0.79014
2048.1		0.68076	0.78568
2049.5		0.66255	0.8166
2051		0.6665	0.80434
2052.4		0.66022	0.77993
2053.8		0.64981	0.76805
2055.2		0.65308	0.80166
2056.7		0.66358	0.79477
2058.1		0.65051	0.78664
2059.5		0.6636	0.80179
2060.9		0.64985	0.79135
2062.4		0.66833	0.78987
2063.8		0.67364	0.77388
2065.2		0.64791	0.7876
2066.6		0.67166	0.80437
2068.1		0.6599	0.7935
2069.5		0.66291	0.79813
2070.9		0.665	0.79595
2072.3		0.66497	0.79618
2073.8		0.66312	0.77226
2075.2		0.65176	0.80175
2076.6		0.66253	0.78874
2078		0.66677	0.77972
2079.5		0.64794	0.79763
2080.9		0.66561	0.79083
2082.3		0.6591	0.7863
2083.7		0.65834	0.78074
2085.2		0.66235	0.76349
2086.6		0.66636	0.81751
2088		0.64469	0.81435
2089.4		0.67777	0.80858
2090.9		0.66065	0.78307
2092.3		0.6636	0.77986
2093.7		0.66286	0.80024
2095.1		0.65234	0.76784
2096.5		0.65509	0.79262
2098		0.67146	0.77454
2099.4		0.66671	0.80447
2100.8		0.64853	0.77178
2102.2		0.66338	0.78012
2103.7		0.69221	0.78635
2105.1		0.6626	0.77723
2106.5		0.65249	0.77532
2107.9		0.65701	0.77807
2109.4		0.67709	0.79427
2110.8		0.63825	0.79075
2112.2		0.67216	0.78266
2113.6		0.66204	0.78126
2115.1		0.66845	0.76787
2116.5		0.65756	0.79331
2117.9		0.65848	0.79205
2119.3		0.66701	0.78393
2120.8		0.67738	0.79001
2122.2		0.65864	0.77686
2123.6		0.66701	0.81143
2125		0.6672	0.78407
2126.5		0.66291	0.81851
2127.9		0.62515	0.78758
2129.3		0.66162	0.80242
2130.7		0.6563	0.80434
2132.2		0.66462	0.79614
2133.6		0.6364	0.78728
2135		0.66089	0.79906
2136.4		0.67017	0.79421
2137.9		0.6972	0.79965
2139.3		0.67547	0.79439
2140.7		0.65206	0.7883
2142.1		0.6481	0.79325
2143.5		0.65483	0.79034
2145		0.65902	0.78326
2146.4		0.68191	0.81318
2147.8		0.65751	0.79873
2149.2		0.66767	0.81479
2150.7		0.68509	0.79991
2152.1		0.66605	0.79615
2153.5		0.66653	0.78086
2154.9		0.65162	0.79789
2156.4		0.67904	0.79605
2157.8		0.68977	0.82476
2159.2		0.64533	0.78025
2160.6		0.67338	0.78735
2162.1		0.66224	0.77918
2163.5		0.65025	0.80866
2164.9		0.66963	0.79395
2166.3		0.6761	0.79186
2167.8		0.66644	0.78004
2169.2		0.67758	0.78652
2170.6		0.66006	0.809
2172		0.65385	0.80011
2173.5		0.65867	0.78272
2174.9		0.64717	0.78256
2176.3		0.66471	0.78705
2177.7		0.66127	0.78406
2179.2		0.67065	0.80239
2180.6		0.66278	0.78506
2182		0.66876	0.80263
2183.4		0.65742	0.81582
2184.9		0.66912	0.79274
2186.3		0.65674	0.81863
2187.7		0.64246	0.77729
2189.1		0.66423	0.78999
2190.6		0.64971	0.80864
2192		0.66976	0.79583
2193.4		0.66381	0.79968
2194.8		0.65156	0.79284
2196.2		0.66282	0.79737
2197.7		0.68581	0.79252
2199.1		0.66706	0.80472
2200.5		0.65342	0.78838
2201.9		0.67406	0.79393
2203.4		0.67995	0.8077
2204.8		0.67136	0.79706
2206.2		0.66841	0.77365
2207.6		0.66987	0.7722
2209.1		0.68652	0.79801
2210.5		0.65783	0.78012
2211.9		0.6695	0.79093
2213.3		0.68033	0.76138
2214.8		0.65856	0.79096
2216.2		0.66549	0.78361
2217.6		0.68494	0.81264
2219		0.66598	0.80762
2220.5		0.6627	0.78255
2221.9		0.67905	0.79321
2223.3		0.65613	0.80002
2224.7		0.67933	0.80002
2226.2		0.68148	0.81619
2227.6		0.67631	0.78615
2229		0.6476	0.77717
2230.4		0.66235	0.80593
2231.9		0.67389	0.76778
2233.3		0.66867	0.79653
2234.7		0.66502	0.7935
2236.1		0.68314	0.78
2237.6		0.6498	0.80336
2239		0.67147	0.80428
2240.4		0.66951	0.7951
2241.8		0.6724	0.77637
2243.2		0.6631	0.7884
2244.7		0.66903	0.78528
2246.1		0.65975	0.80274
2247.5		0.65678	0.79108
2248.9		0.64931	0.80588
2250.4		0.65788	0.78982
2251.8		0.67209	0.77751
2253.2		0.68077	0.81496
2254.6		0.66758	0.80239
2256.1		0.65576	0.79172
2257.5		0.67372	0.80777
2258.9		0.6932	0.80424
2260.3		0.68144	0.80489
2261.8		0.67178	0.78834
2263.2		0.66339	0.79618
2264.6		0.70071	0.79711
2266		0.65864	0.78664
2267.5		0.66496	0.81381
2268.9		0.67754	0.82385
2270.3		0.67635	0.76672
2271.7		0.66177	0.80301
2273.2		0.67063	0.78718
2274.6		0.65206	0.80833
2276		0.65428	0.80548
2277.4		0.67778	0.80477
2278.9		0.67847	0.81173
2280.3		0.65651	0.79128
2281.7		0.65418	0.79786
2283.1		0.68175	0.79948
2284.6		0.65915	0.79862
2286		0.6641	0.79963
2287.4		0.68027	0.80373
2288.8		0.66192	0.79784
2290.2		0.66429	0.80044
2291.7		0.6575	0.80977
2293.1		0.66792	0.80615
2294.5		0.66017	0.81004
2295.9		0.69355	0.82034
2297.4		0.66138	0.79653
2298.8		0.66879	0.77331
2300.2		0.66633	0.80264
2301.6		0.68595	0.78307
2303.1		0.66945	0.79721
2304.5		0.65481	0.80508
2305.9		0.67224	0.82593
2307.3		0.66715	0.81607
2308.8		0.66121	0.79802
2310.2		0.66733	0.77552
2311.6		0.68782	0.79745
2313		0.68472	0.791
2314.5		0.67133	0.79508
2315.9		0.67126	0.80466
2317.3		0.67307	0.80229
2318.7		0.68127	0.80296
2320.2		0.68447	0.79023
2321.6		0.67855	0.80658
2323		0.66597	0.78142
2324.4		0.68484	0.78681
2325.9		0.67611	0.80539
2327.3		0.6902	0.81024
2328.7		0.67004	0.80296
2330.1		0.68941	0.81566
2331.6		0.67433	0.80291
2333		0.67517	0.80504
2334.4		0.68242	0.80095
2335.8		0.66148	0.80034
2337.3		0.68994	0.78517
2338.7		0.69639	0.80454
2340.1		0.66539	0.78904
2341.5		0.6762	0.81433
2342.9		0.67159	0.81327
2344.4		0.68584	0.80916
2345.8		0.67054	0.80734
2347.2		0.68343	0.80851
2348.6		0.69079	0.8108
2350.1		0.66545	0.79776
2351.5		0.6703	0.80168
2352.9		0.66797	0.80745
2354.3		0.67513	0.79166
2355.8		0.6684	0.80176
2357.2		0.67746	0.81236
2358.6		0.68307	0.79446
2360		0.68272	0.8041
2361.5		0.67732	0.80947
2362.9		0.65437	0.82453
2364.3		0.65907	0.79594
2365.7		0.6889	0.78906
2367.2		0.65908	0.78489
2368.6		0.67722	0.80551
2370		0.66989	0.78985
2371.4		0.66926	0.81035
2372.9		0.66462	0.79633
2374.3		0.68189	0.79397
2375.7		0.67458	0.82007
2377.1		0.68139	0.79158
2378.6		0.70051	0.78403
2380		0.68515	0.80787
2381.4		0.65972	0.78117
2382.8		0.69557	0.79465
2384.3		0.68482	0.7937
2385.7		0.67752	0.82006
2387.1		0.65797	0.78591
2388.5		0.68233	0.80585
2389.9		0.66618	0.80761
2391.4		0.66568	0.80075
2392.8		0.68314	0.79899
2394.2		0.68181	0.77979
2395.6		0.68585	0.79433
2397.1		0.67787	0.79688
2398.5		0.68087	0.78409
2399.9		0.67796	0.79762
2401.3		0.66739	0.79078
2402.8		0.66724	0.80637
2404.2		0.67127	0.8212
2405.6		0.68499	0.81784
2407		0.68408	0.79824
2408.5		0.67825	0.81021
2409.9		0.68256	0.80995
2411.3		0.66857	0.79796
2412.7		0.68629	0.79374
2414.2		0.68057	0.7949
2415.6		0.65969	0.8178
2417		0.67305	0.80884
2418.4		0.68365	0.78812
2419.9		0.6897	0.80659
2421.3		0.67835	0.77283
2422.7		0.6553	0.78786
2424.1		0.67754	0.79725
2425.6		0.66217	0.82034
2427		0.68709	0.80852
2428.4		0.68169	0.81255
2429.8		0.68743	0.82242
2431.3		0.68276	0.80656
2432.7		0.6898	0.80314
2434.1		0.67553	0.81114
2435.5		0.68366	0.80277
2437		0.68773	0.78986
2438.4		0.68137	0.82238
2439.8		0.67528	0.7926
2441.2		0.70554	0.81375
2442.6		0.67694	0.81248
2444.1		0.67821	0.80922
2445.5		0.68452	0.8126
2446.9		0.65748	0.76653
2448.3		0.66784	0.79794
2449.8		0.67658	0.80308
2451.2		0.67355	0.8049
2452.6		0.68	0.79348
2454		0.68962	0.80164
2455.5		0.68797	0.80824
2456.9		0.66458	0.80677
2458.3		0.68577	0.81498
2459.7		0.68494	0.79332
2461.2		0.70261	0.81355
2462.6		0.66211	0.81414
2464		0.65242	0.7998
2465.4		0.69586	0.81258
2466.9		0.69623	0.82104
2468.3		0.67577	0.79795
2469.7		0.6753	0.79848
2471.1		0.68153	0.81369
2472.6		0.67903	0.80437
2474		0.67161	0.79007
2475.4		0.67564	0.79619
2476.8		0.65876	0.78778
2478.3		0.69283	0.81569
2479.7		0.68371	0.80815
2481.1		0.67712	0.80229
2482.5		0.68435	0.79896
2484		0.68496	0.79635
2485.4		0.69869	0.81376
2486.8		0.68468	0.80642
2488.2		0.67873	0.81287
2489.6		0.68166	0.78491
2491.1		0.68503	0.82861
2492.5		0.68217	0.80731
2493.9		0.68527	0.83094
2495.3		0.67442	0.80017
2496.8		0.6698	0.79861
2498.2		0.66294	0.78602
2499.6		0.68331	0.8187
2501		0.67816	0.80043
2502.5		0.66296	0.80529
2503.9		0.68053	0.79222
2505.3		0.6703	0.79024
2506.7		0.68493	0.79703
2508.2		0.66897	0.76347
2509.6		0.67057	0.80991
2511		0.67451	0.82031
2512.4		0.68093	0.80996
2513.9		0.65706	0.81428
2515.3		0.67889	0.82543
2516.7		0.69784	0.80414
2518.1		0.6732	0.80712
2519.6		0.67539	0.8047
2521		0.69323	0.80848
2522.4		0.70509	0.78877
2523.8		0.68879	0.81073
2525.3		0.69452	0.78721
2526.7		0.69076	0.83354
2528.1		0.6694	0.81501
2529.5		0.68926	0.78974
2531		0.67881	0.79924
2532.4		0.68555	0.80299
2533.8		0.68509	0.803
2535.2		0.69353	0.82104
2536.7		0.69399	0.78696
2538.1		0.67521	0.82056
2539.5		0.66768	0.84149
2540.9		0.69277	0.81958
2542.3		0.69678	0.81343
2543.8		0.70089	0.79306
2545.2		0.68478	0.79301
2546.6		0.68853	0.81419
2548		0.69561	0.80964
2549.5		0.66808	0.81089
2550.9		0.69401	0.80963
2552.3		0.67859	0.80731
2553.7		0.70429	0.79932
2555.2		0.65726	0.80581
2556.6		0.66492	0.80503
2558		0.68455	0.77227
2559.4		0.695	0.80355
2560.9		0.67631	0.83733
2562.3		0.70063	0.81136
2563.7		0.68235	0.81937
2565.1		0.69147	0.78766
2566.6		0.68641	0.81738
2568		0.66728	0.79404
2569.4		0.69437	0.78989
2570.8		0.68159	0.80684
2572.3		0.67128	0.83014
2573.7		0.66545	0.81246
2575.1		0.68701	0.78913
2576.5		0.68792	0.81112
2578		0.68153	0.80574
2579.4		0.67565	0.79852
2580.8		0.6821	0.81949
2582.2		0.68638	0.79177
2583.7		0.70387	0.81237
2585.1		0.68841	0.82516
2586.5		0.70021	0.81002
2587.9		0.70269	0.77851
2589.3		0.67093	0.81564
2590.8		0.65736	0.80503
2592.2		0.6784	0.80354
2593.6		0.68428	0.8049
2595		0.67297	0.78735
2596.5		0.68041	0.80478
2597.9		0.68032	0.81715
2599.3		0.6748	0.80408
2600.7		0.69628	0.81441
2602.2		0.67602	0.79912
2603.6		0.68208	0.8054
2605		0.66255	0.80419
2606.4		0.6856	0.80299
2607.9		0.67697	0.7992
2609.3		0.68188	0.79528
2610.7		0.68	0.83548
2612.1		0.65793	0.80666
2613.6		0.66398	0.81075
2615		0.67231	0.80027
2616.4		0.68351	0.81147
2617.8		0.66049	0.81972
2619.3		0.67661	0.8266
2620.7		0.68679	0.79673
2622.1		0.6946	0.8045
2623.5		0.69178	0.81235
2625		0.68882	0.78978
2626.4		0.66696	0.82108
2627.8		0.67642	0.8131
2629.2		0.69583	0.82174
2630.7		0.6887	0.80127
2632.1		0.70533	0.81342
2633.5		0.6881	0.82284
2634.9		0.67674	0.77949
2636.4		0.66916	0.81076
2637.8		0.68127	0.82277
2639.2		0.68266	0.79304
2640.6		0.6979	0.8251
2642		0.69525	0.80372
2643.5		0.67908	0.84057
2644.9		0.67075	0.77527
2646.3		0.6774	0.81266
2647.7		0.67879	0.79288
2649.2		0.67429	0.80315
2650.6		0.67551	0.83848
2652		0.69821	0.80092
2653.4		0.68735	0.80702
2654.9		0.66955	0.80192
2656.3		0.69903	0.81791
2657.7		0.66795	0.83737
2659.1		0.68062	0.82484
2660.6		0.69038	0.81692
2662		0.68993	0.8088
2663.4		0.67797	0.80663
2664.8		0.71564	0.82783
2666.3		0.6837	0.8008
2667.7		0.67994	0.82226
2669.1		0.68143	0.80373
2670.5		0.67559	0.82233
2672		0.68126	0.82475
2673.4		0.6675	0.83575
2674.8		0.68553	0.78713
2676.2		0.67971	0.81892
2677.7		0.70231	0.79343
2679.1		0.67054	0.82595
2680.5		0.69617	0.81058
2681.9		0.7087	0.78501
2683.4		0.67412	0.8106
2684.8		0.68923	0.79573
2686.2		0.69143	0.83178
2687.6		0.68951	0.7791
2689		0.66812	0.8043
2690.5		0.65945	0.81013
2691.9		0.68632	0.80655
2693.3		0.69003	0.82712
2694.7		0.6902	0.816
2696.2		0.68256	0.82681
2697.6		0.68615	0.82747
2699		0.67655	0.8123
2700.4		0.69752	0.80919
2701.9		0.66854	0.80433
2703.3		0.68451	0.79436
2704.7		0.69436	0.80943
2706.1		0.68597	0.83341
2707.6		0.68434	0.78023
2709		0.67312	0.82186
2710.4		0.69866	0.8319
2711.8		0.67	0.82437
2713.3		0.69235	0.81805
2714.7		0.67617	0.78232
2716.1		0.67312	0.81161
2717.5		0.68805	0.79969
2719		0.67961	0.8113
2720.4		0.66534	0.77354
2721.8		0.68589	0.81222
2723.2		0.69016	0.80757
2724.7		0.6687	0.80513
2726.1		0.68299	0.82932
2727.5		0.68143	0.79062
2728.9		0.70135	0.81657
2730.4		0.70029	0.80546
2731.8		0.69959	0.80971
2733.2		0.68753	0.82015
2734.6		0.68783	0.7895
2736.1		0.67857	0.79094
2737.5		0.71797	0.78771
2738.9		0.69514	0.8228
2740.3		0.70044	0.80192
2741.7		0.69209	0.79918
2743.2		0.69702	0.7983
2744.6		0.70917	0.82092
2746		0.68105	0.8135
2747.4		0.68616	0.8194
2748.9		0.68594	0.80575
2750.3		0.68307	0.80527
2751.7		0.7016	0.82854
2753.1		0.69074	0.80612
2754.6		0.67723	0.80443
2756		0.6924	0.80512
2757.4		0.70268	0.81802
2758.8		0.67229	0.81761
2760.3		0.69316	0.81628
2761.7		0.69792	0.80806
2763.1		0.69368	0.79247
2764.5		0.67896	0.82258
2766		0.68417	0.82358
2767.4		0.68785	0.82167
2768.8		0.67119	0.81229
2770.2		0.69175	0.81017
2771.7		0.69126	0.80828
2773.1		0.70772	0.80417
2774.5		0.69499	0.82183
2775.9		0.68703	0.82118
2777.4		0.69277	0.8567
2778.8		0.70676	0.8066
2780.2		0.68468	0.80994
2781.6		0.69374	0.81049
2783.1		0.70197	0.81135
2784.5		0.68529	0.81263
2785.9		0.68676	0.82919
2787.3		0.69805	0.8026
2788.7		0.69721	0.81197
2790.2		0.69663	0.81454
2791.6		0.70513	0.80768
2793		0.69549	0.81477
2794.4		0.68227	0.8155
2795.9		0.67709	0.8021
2797.3		0.71782	0.80678
2798.7		0.66813	0.81505
2800.1		0.67581	0.82725
2801.6		0.70108	0.81213
2803		0.71213	0.82603
2804.4		0.71111	0.791
2805.8		0.68749	0.79111
2807.3		0.71143	0.8046
2808.7		0.68038	0.81306
2810.1		0.68823	0.81504
2811.5		0.69314	0.79745
2813		0.68534	0.81839
2814.4		0.69758	0.81102
2815.8		0.68634	0.82285
2817.2		0.67868	0.80787
2818.7		0.68378	0.82343
2820.1		0.67775	0.83023
2821.5		0.70004	0.82209
2822.9		0.6929	0.81899
2824.4		0.68753	0.83377
2825.8		0.68169	0.82525
2827.2		0.69648	0.80495
2828.6		0.6942	0.79453
2830.1		0.71522	0.81574
2831.5		0.69625	0.81791
2832.9		0.70689	0.79096
[truncated: 2,955 more rows]

## Sheet: F7-FS2-D
											Quinacrine with Bafilomycin A1 effect
	Combined Dconfocal (um2s-1)	Standard Error	Percentage error			Combined Dconfocal Comparison					in HeLa Cytoplasm
0 Bafilomycin (un-treated)	2.45	0.0927235	3.78071
100nm Bafilomycin	2.4	0.0632666	2.63134
