# Supplementary material for: Reversing protonation of weakly basic drugs greatly enhances intracellular diffusion and decreases lysosomal sequestration
Source: eLife. 2024 Dec 6;13:RP97255. doi: 10.7554/eLife.97255 (PMC11623935; doi:10.7554/eLife.97255)
Supplement: Figure 8—figure supplement 1—source data 1. [file elife-97255-fig8-figsupp1-data1.xlsx]

## Sheet: F8-FS1-I
Time axis (re-adjusted)	Pre-Bleach	Primaquine-Acetate(Microinjection)	Primaquine-Acetate(Incubations)	Primaquine (Incubation)
-0.702	1.0295
-0.359	1					FRAP of Primaquine analogues in HeLa cell cytoplasm
-0.172	0.97977					Combined Averaged FRAP profiles Normalized
0		0.45195	0.40595	0.237
0.172		0.51309	0.48356	0.28531
0.359		0.55053	0.51611	0.29796
0.702		0.54711	0.51765	0.30694
0.858		0.56365	0.54048	0.31435
1.03		0.55758	0.55568	0.30691
1.201		0.56947	0.55299	0.31507
1.357		0.56819	0.5358	0.31417
1.529		0.57592	0.54774	0.31329
1.701		0.5837	0.5482	0.31412
1.888		0.58617	0.54717	0.30418
2.044		0.59951	0.56641	0.32294
2.215		0.58809	0.56941	0.30681
2.371		0.5684	0.56578	0.31464
2.543		0.58401	0.56876	0.31413
2.715		0.59872	0.56208	0.30771
2.871		0.58615	0.56346	0.32023
3.042		0.5902	0.56917	0.31405
3.214		0.58502	0.58094	0.30638
3.401		0.59278	0.58276	0.31259
3.557		0.58186	0.57991	0.31052
3.729		0.59612	0.58644	0.3132
3.885		0.60411	0.56394	0.30885
4.056		0.59811	0.56434	0.31175
4.228		0.58291	0.56996	0.29971
4.415		0.59028	0.5624	0.30858
4.587		0.59228	0.5794	0.30409
4.758		0.60335	0.56403	0.30642
4.93		0.59781	0.58707	0.30699
5.101		0.61309	0.58107	0.32151
5.289		0.58956	0.58545	0.3082
5.445		0.59568	0.57357	0.30756
5.601		0.58964	0.5808	0.31116
5.772		0.59506	0.59029	0.30429
5.944		0.6003	0.57769	0.30976
6.131		0.60854	0.58743	0.31274
6.303		0.60251	0.57727	0.3095
6.474		0.60519	0.5952	0.30894
6.63		0.60018	0.57705	0.30052
6.802		0.57816	0.58269	0.30483
6.958		0.59251	0.58424	0.30887
7.145		0.58398	0.55793	0.30912
7.332		0.59701	0.60614	0.30575
7.504		0.59313	0.5963	0.3045
7.675		0.59452	0.59896	0.30491
7.863		0.58645	0.58885	0.30481
8.034		0.59638	0.58663	0.30429
8.206		0.59198	0.59011	0.30618
8.393		0.59828	0.58846	0.31071
8.549		0.59092	0.59847	0.31131
8.721		0.58535	0.59232	0.30298
8.877		0.59329	0.59143	0.30347
9.048		0.58354	0.59076	0.30173
9.22		0.57921	0.59973	0.3005
9.376		0.59039	0.5811	0.30338
9.532		0.58741	0.57625	0.29865
9.703		0.60111	0.58065	0.29792
9.891		0.58416	0.57743	0.30335
10.062		0.58428	0.60444	0.29644
10.234		0.59405	0.60277	0.29125
10.39		0.5988	0.58781	0.2971
10.546		0.5929	0.59739	0.30047
10.733		0.58334	0.59166	0.30265
10.889		0.59819	0.59593	0.29896
11.045		0.57304	0.58466	0.2955
11.217		0.58856	0.5978	0.30125
11.404		0.56624	0.57906	0.29342
11.575		0.59788	0.59174	0.29917
11.747		0.57915	0.59821	0.29417
11.934		0.58551	0.5849	0.29076
12.09		0.59277	0.59092	0.29745
12.262		0.57564	0.60497	0.29662
12.433		0.59731	0.59226	0.30509
12.589		0.58756	0.58797	0.29302
12.761		0.57961	0.59156	0.29333
12.933		0.58737	0.60342	0.2992
13.104		0.59281	0.59041	0.29521
13.291		0.58073	0.58603	0.2933
13.447		0.58702	0.607	0.28799
13.635		0.58836	0.59249	0.29165
13.853		0.59072	0.59235	0.29327
14.025		0.57778	0.58731	0.29454
14.196		0.56727	0.57507	0.28997
14.352		0.58541	0.5838	0.2901
14.508		0.58149	0.5831	0.28886
14.68		0.5923	0.60431	0.29203
14.867		0.58146	0.5812	0.29398
15.039		0.56604	0.57936	0.28952
15.21		0.58291	0.59311	0.29339
15.366		0.5832	0.61258	0.29296
15.538		0.57039	0.59382	0.30313
15.709		0.58286	0.58817	0.29801
15.865		0.5848	0.58383	0.29033
16.021		0.5722	0.60445	0.28477
16.209		0.56948	0.58985	0.29399
16.349		0.58349	0.57627	0.29275
16.521		0.56622	0.60464	0.29273
16.692
16.848
17.02

## Sheet: F8-FS1-J
	Percentage of Recoveries	Standard Error			percentage of recoveries for Primaquine analogues in HeLa cytoplasm
Primaquine-Acetate(Microinjection)	57.5	1.2
Primaquine-Acetate(Incubations)	59.2	1.3
Primaquine (Incubation)	29.1	0.6
