# Supplementary material for: Reversing protonation of weakly basic drugs greatly enhances intracellular diffusion and decreases lysosomal sequestration
Source: eLife. 2024 Dec 6;13:RP97255. doi: 10.7554/eLife.97255 (PMC11623935; doi:10.7554/eLife.97255)
Supplement: Figure 8—figure supplement 2—source data 1. [file elife-97255-fig8-figsupp2-data1.xlsx]

## Sheet: F8-FS2-H
Time axis (re-adjusted)	Pre-Bleach	BODIPY-Acetate (5uM)	BODIPY (5uM)			FRAP of BODIPY analogues in HeLa cell cytoplasm
-0.671	0.99765					Combined Averaged FRAP profiles Normalized
-0.328	1
-0.172	0.99292
0		0.26322	0.19951
0.172		0.32027	0.24572
0.328		0.36235	0.27396
0.64		0.38925	0.30388
0.827		0.41418	0.32485
0.983		0.43645	0.33847
1.139		0.45235	0.35011
1.311		0.46158	0.35916
1.482		0.47113	0.3758
1.638		0.4952	0.38789
1.779		0.49664	0.38819
1.935		0.5125	0.3939
2.091		0.51492	0.40708
2.247		0.51594	0.41855
2.403		0.52798	0.41266
2.559		0.53633	0.41837
2.715		0.53433	0.42509
2.886		0.53187	0.43171
3.058		0.54246	0.43654
3.229		0.54432	0.43969
3.385		0.5522	0.44097
3.557		0.555	0.44707
3.729		0.56064	0.44634
3.947		0.55858	0.45656
4.103		0.56689	0.45413
4.243		0.57042	0.45855
4.399		0.56667	0.46278
4.571		0.56857	0.46792
4.711		0.56689	0.46756
4.899		0.57125	0.47309
5.07		0.57713	0.46658
5.211		0.57385	0.47123
5.398		0.57347	0.47741
5.554		0.57565	0.4827
5.71		0.57918	0.48423
5.897		0.5918	0.4842
6.053		0.58618	0.48327
6.225		0.59141	0.48674
6.381		0.58513	0.48626
6.552		0.58832	0.4866
6.724		0.59651	0.48937
6.88		0.59735	0.49263
7.051		0.60323	0.48659
7.192		0.59948	0.49284
7.379		0.59564	0.50491
7.535		0.60183	0.4972
7.691		0.60471	0.49666
7.831		0.6046	0.49879
8.003		0.60332	0.50122
8.143		0.6005	0.50812
8.299		0.60686	0.50604
8.455		0.61279	0.49621
8.611		0.60874	0.51152
8.767		0.61103	0.51251
8.923		0.61945	0.51665
9.079		0.61516	0.50689
9.251		0.61361	0.5141
9.407		0.62261	0.50777
9.579		0.6234	0.51004
9.75		0.61743	0.52092
9.906		0.62217	0.52013
10.062		0.62287	0.5128
10.218		0.6274	0.51452
10.405		0.62212	0.52638
10.561		0.62474	0.52374
10.702		0.62235	0.52252
10.889		0.62643	0.51691
11.061		0.63502	0.52297
11.201		0.62784	0.52846
11.388		0.62584	0.52208
11.544		0.63888	0.53184
11.7		0.63392	0.52733
11.887		0.63307	0.52423
12.043		0.63212	0.53174
12.215		0.63084	0.52883
12.402		0.6259	0.53476
12.574		0.62406	0.5283
12.714		0.63636	0.52895
12.87		0.64229	0.52927
13.026		0.63866	0.53
13.213		0.63505	0.53027
13.401		0.6413	0.53593
13.557		0.6432	0.53412
13.697		0.63547	0.53789
13.884		0.6371	0.53519
14.056		0.64244	0.53469
14.196		0.64466	0.53556
14.383		0.64469	0.53503
14.555		0.63175	0.5364
14.695		0.64327	0.53953
14.883		0.64891	0.53483
15.039		0.64419	0.53786
15.179		0.64469	0.53676
15.335		0.64765	0.53403
15.491		0.65075	0.54041
15.647		0.65463	0.54125
15.787		0.65592	0.53916
15.959		0.64927	0.53984
16.115		0.64949	0.54268
16.287		0.6512	0.5415
16.474		0.6497	0.5376
16.63		0.65341	0.54165
16.817		0.65063	0.54452
16.973		0.65561	0.5438
17.129		0.65024	0.53957
17.301		0.65105	0.54456
17.472		0.6532	0.53934
17.628		0.65881	0.54383
17.8		0.65847	0.5387
17.956		0.66214	0.54324
18.112		0.65904	0.54323
18.268		0.65328	0.53808
18.408		0.64855	0.54478
18.58		0.6546	0.53667
18.72		0.65728	0.53968
18.907		0.64891	0.54667
19.079		0.65843	0.54423
19.251		0.6598	0.54721
19.407		0.65958	0.54317
19.578		0.6624	0.54467
19.719		0.65894	0.54674
19.906		0.65901	0.54709
20.062		0.66092	0.5432
20.202		0.65953	0.55036
20.389		0.65554	0.54978
20.561		0.66226	0.5517
20.733		0.66311	0.55245
20.889		0.66841	0.5489
21.06		0.6667	0.55281
21.201		0.66171	0.55484
21.388		0.66186	0.55582
21.544		0.6625	0.55417
21.731		0.65739	0.55051
21.871		0.65976	0.55529
22.043		0.667	0.55413
22.183		0.65969	0.55665
22.324		0.6648	0.55465
22.495		0.66305	0.55322
22.651		0.65788	0.55644
22.792		0.66397	0.56065
22.963		0.66458	0.55664
23.104		0.6733	0.55747
23.291		0.6743	0.56561
23.478		0.67462	0.55956
23.634		0.66301	0.55918
23.775		0.68473	0.56739
23.931		0.67831	0.56001
24.102
24.274
24.43

## Sheet: F8-FS2-I
	T1/2 (Half-life) (S)	Standard Error	Percentage error
BODIPY-Acetate (5uM)	1.1633	0.087	7.44
BODIPY (5uM)	1.3737	0.09	6.77	averaged half-life comparison
