# Supplementary material for: Reversing protonation of weakly basic drugs greatly enhances intracellular diffusion and decreases lysosomal sequestration
Source: eLife. 2024 Dec 6;13:RP97255. doi: 10.7554/eLife.97255 (PMC11623935; doi:10.7554/eLife.97255)
Supplement: Figure 8—source data 1. [file elife-97255-fig8-data1.xlsx]

## Sheet: Figure 8B
Time axis (re-adjusted)	Pre-Bleach	Fluorescein	CCF2	5-Amino Fluorescein	5-Amino Fluorescein (Na-Azide treated)				FRAP of Fluoresscien Analogues
-13.261	0.98705								Averaged Noramalized Combined profiles
-11.78	0.98088
-10.31	1
-8.84	0.9864
-7.3674	0.99039
-5.8938	0.97091
-4.42	0.98829
-2.946	0.98206
-1.47	0.96254
0		0.22062	0.19492	0.26233	0.24756
1.4735		0.2758	0.2183	0.29144	0.26683
2.9469		0.30041	0.22784	0.2932	0.28384
4.4204		0.34012	0.2344	0.31037	0.28477
5.8939		0.34675	0.24429	0.31344	0.29202
7.3674		0.38075	0.26338	0.31173	0.30072
8.8408		0.40299	0.27374	0.32611	0.29994
10.314		0.40987	0.28172	0.31674	0.30981
11.788		0.44348	0.28528	0.32585	0.30414
13.261		0.44499	0.28911	0.32539	0.31553
14.735		0.45431	0.29313	0.32852	0.32934
16.208		0.49491	0.31557	0.34083	0.31929
17.682		0.49694	0.2973	0.32942	0.32904
19.155		0.50464	0.32525	0.34598	0.33182
20.629		0.50705	0.31469	0.34354	0.32729
22.102		0.53065	0.32311	0.34708	0.33219
23.576		0.53605	0.32489	0.33414	0.32761
25.049		0.54603	0.31465	0.35082	0.32884
26.523		0.58415	0.33163	0.3462	0.33787
27.996		0.55519	0.34143	0.35521	0.33997
29.469		0.57193	0.34657	0.35548	0.35562
30.943		0.59113	0.3508	0.36325	0.34732
32.416		0.57692	0.36693	0.36749	0.35696
33.89		0.60326	0.3576	0.34937	0.34789
35.363		0.60645	0.34613	0.35762	0.35141
36.837		0.60838	0.36733	0.35903	0.36079
38.31		0.62315	0.37132	0.36659	0.34475
39.784		0.60706	0.38201	0.35747	0.36651
41.257		0.61147	0.37271	0.37895	0.35426
42.731		0.62566	0.38187	0.3605	0.35964
44.204		0.6419	0.37424	0.36036	0.34851
45.678		0.63361	0.36418	0.38311	0.35328
47.151		0.64584	0.3919	0.36769	0.35939
48.625		0.66404	0.38109	0.3829	0.35527
50.098		0.65844	0.38843	0.37137	0.36509
51.572		0.66483	0.38373	0.36964	0.351
53.045		0.66105	0.39979	0.36524	0.36224
54.519		0.65572	0.38954	0.36027	0.35909
55.992		0.65635	0.38381	0.38015	0.35821
57.465		0.69	0.3892	0.38267	0.36278
58.939		0.66986	0.39121	0.3599	0.37032
60.412		0.68973	0.4021	0.38851	0.36605
61.886		0.69878	0.38857	0.3799	0.36289
63.359		0.67891	0.39866	0.3692	0.36814
64.833		0.68564	0.40547	0.37705	0.37309
66.306		0.69748	0.42081	0.38427	0.35307
67.78		0.70048	0.41146	0.38334	0.36928
69.253		0.72004	0.40414	0.37078	0.35778
70.727		0.6971	0.40866	0.3879	0.37184
72.2		0.71909	0.40251	0.38651	0.38306
73.674		0.71166	0.42834	0.38629	0.38309
75.147		0.7204	0.41232	0.37846	0.37267
76.621		0.69396	0.3989	0.38124	0.3833
78.094		0.73092	0.40291	0.38142	0.38334
79.568		0.72732	0.42215	0.38316	0.36819
81.041		0.70045	0.43612	0.3755	0.36416
82.515		0.72402	0.43698	0.38933	0.38289
83.988		0.71688	0.41765	0.38467	0.37215
85.461		0.73117	0.43814	0.38222	0.37973
86.935		0.74445	0.42932	0.38282	0.38154
88.408		0.74816	0.42513	0.38113	0.37426
89.882		0.74452	0.45185	0.38307	0.3878
91.355		0.73186	0.43243	0.38036	0.37714
92.829		0.74344	0.44278	0.3963	0.37862
94.302		0.73148	0.43472	0.3863	0.38267
95.776		0.72316	0.43703	0.38417	0.38377
97.249		0.74165	0.44506	0.39241	0.38756
98.723		0.76141	0.44712	0.36608	0.38423
100.2		0.74854	0.43537	0.38968	0.37423
101.67		0.72782	0.4452	0.38987	0.38692
103.14		0.75066	0.44308	0.39144	0.3968
104.62		0.73292	0.44403	0.38778	0.40013
106.09		0.76402	0.44845	0.38787	0.38574
107.56		0.76684	0.45475	0.40156	0.38542
109.04		0.7581	0.44459	0.39822	0.39268
110.51		0.75778	0.44067	0.39117	0.39313
111.98		0.76579	0.44695	0.3861	0.39628
113.46		0.78195	0.43386	0.38704	0.3937
114.93		0.77256	0.44975	0.38521	0.39001
116.4		0.77231	0.4557	0.39014	0.39015
117.88		0.78507	0.45187	0.40681	0.40466
119.35		0.75593	0.46083	0.38315	0.38719
120.82		0.78852	0.47033	0.38673	0.38707
122.3		0.77323	0.45517	0.40337	0.39131
123.77		0.78408	0.45018	0.4	0.39603
125.25		0.77227	0.4683	0.4216	0.40019
126.72		0.78174	0.45446	0.4009	0.39125
128.19		0.79341	0.45192	0.39407	0.40706
129.67		0.77438	0.47919	0.39142	0.41811
131.14		0.77512	0.48096	0.39098	0.39723
132.61		0.79696	0.46904	0.41375	0.39782
134.09		0.75274	0.45636	0.39344	0.40285
135.56		0.7853	0.45303	0.39996	0.41085
137.03		0.78476	0.47142	0.40332	0.40397
138.51		0.79688	0.47526	0.41328	0.38963
139.98		0.79172	0.46736	0.38476	0.38336
141.45		0.77007	0.47587	0.3927	0.40119
142.93		0.76604	0.48924	0.39575	0.4079
144.4		0.79867	0.4714	0.39677	0.41207
145.87		0.77715	0.46575	0.39208	0.39419
147.35		0.78968	0.47853	0.39795	0.40115
148.82		0.80431	0.47181	0.406	0.40592
150.29		0.79143	0.48494	0.40822	0.40858
151.77		0.81741	0.46072	0.40274	0.38849
153.24		0.78612	0.48741	0.41502	0.39849
154.71		0.79662	0.47532	0.40803	0.41711
156.19		0.80383	0.46722	0.40873	0.40359
157.66		0.81306	0.48701	0.39776	0.40741
159.14		0.78176	0.48476	0.40834	0.40831
160.61		0.80728	0.47874	0.41965	0.4102
162.08		0.80465	0.47726	0.42057	0.40253
163.56		0.81113	0.49521	0.41749	0.40703
165.03		0.82494	0.48201	0.39388	0.41254
166.5		0.80168	0.4925	0.40368	0.40821
167.98		0.79177	0.48604	0.41334	0.40781
169.45		0.80299	0.52251	0.4128	0.42201
170.92		0.80774	0.48407	0.40602	0.40905
172.4		0.79701	0.50123	0.3905	0.40892
173.87		0.80629	0.48813	0.40564	0.40679
175.34		0.81211	0.49736	0.41985	0.41084
176.82		0.79407	0.49959	0.40022	0.41341
178.29		0.80264	0.49271	0.42062	0.39961
179.76		0.79105	0.49979	0.40528	0.42213
181.24		0.81032	0.48991	0.39949	0.41945
182.71		0.8221	0.50498	0.41927	0.41451
184.18		0.78528	0.47995	0.40186	0.4207
185.66		0.78633	0.50693	0.40897	0.41658
187.13		0.82573	0.49111	0.41837	0.41821
188.6		0.8193	0.48976	0.41846	0.426
190.08		0.83683	0.48683	0.41593	0.41018
191.55		0.81318	0.5009	0.40675	0.40921
193.03		0.81166	0.49516	0.41254	0.40514
194.5		0.81164	0.50144	0.40734	0.41893
195.97		0.80087	0.50279	0.40138	0.416
197.45		0.8228	0.49032	0.41864	0.41763
198.92		0.82238	0.50315	0.41108	0.40385
200.39		0.84797	0.51443	0.40707	0.41428
201.87		0.82789	0.50059	0.41175	0.42355
203.34		0.81149	0.5296	0.42069	0.42582
204.81		0.82107	0.52053	0.42198	0.41762
206.29		0.84182	0.48677	0.41221	0.42188
207.76		0.8227	0.50636	0.40316	0.42398
209.23		0.80664	0.51217	0.40351	0.42165
210.71		0.82777	0.50379	0.41768	0.41506
212.18		0.83524	0.5169	0.4205	0.41241
213.65		0.82137	0.51084	0.40889	0.41643
215.13		0.8203	0.50358	0.41177	0.42545
216.6		0.82985	0.51021	0.41187	0.42024
218.07		0.8243	0.51404	0.40621	0.41784
219.55		0.82197	0.51824	0.4219	0.40973
221.02		0.81436	0.50812	0.40283	0.42396
222.49		0.82561	0.52493	0.41348	0.4228
223.97		0.83097	0.51742	0.40541	0.41875
225.44		0.82256	0.52635	0.41774	0.41531
226.91		0.83982	0.49932	0.41303	0.4068
228.39		0.84573	0.52486	0.4232	0.41758
229.86		0.83134	0.51403	0.41758	0.42479
231.34		0.83583	0.53014	0.4219	0.41317
232.81		0.81331	0.52717	0.40225	0.41928
234.28		0.84245	0.51953	0.41866	0.42318
235.76		0.83469	0.52725	0.40425	0.43123
237.23		0.83257	0.55206	0.43891	0.42616
238.7		0.82346	0.52463	0.41036	0.42355
240.18		0.84276	0.52051	0.41361	0.42361
241.65		0.85826	0.52224	0.41488	0.4224
243.12		0.84961	0.53811	0.41408	0.41837
244.6		0.84881	0.49831	0.41979	0.43363
246.07		0.81104	0.54865	0.41331	0.42851
247.54		0.82107	0.52388	0.45381	0.42176
249.02		0.84061	0.5307	0.42791	0.41885
250.49		0.82675	0.53707	0.40443	0.42506
251.96		0.83156	0.53944	0.40522	0.42557
253.44		0.83238	0.53198	0.4221	0.43011
254.91		0.83294	0.5285	0.41212	0.42455
256.38		0.83383	0.52073	0.43081	0.42893
257.86		0.83084	0.53785	0.41469	0.4357
259.33		0.85092	0.53232	0.43701	0.42591
260.8		0.85271	0.53201	0.42355	0.42979
262.28		0.83884	0.53618	0.40989	0.42547
263.75		0.83847	0.53159	0.41851	0.43636
265.23		0.83851	0.55891	0.40718	0.42637
266.7		0.86072	0.53109	0.41992	0.43432
268.17		0.85648	0.53952	0.42511	0.41598
269.65		0.83034	0.52849	0.42278	0.42388
271.12		0.83519	0.53703	0.42829	0.42461
272.59		0.83534	0.5408	0.41165	0.44979
274.07		0.85407	0.5427	0.42899	0.44359
275.54		0.84643	0.54292	0.42493	0.42639
277.01		0.85811	0.53208	0.43429	0.42507
278.49		0.84376	0.53586	0.41015	0.42522
279.96		0.86866	0.55518	0.43627	0.41716
281.43		0.83814	0.55145	0.41825	0.43071
282.91		0.85543	0.52663	0.4381	0.44312
284.38		0.85395	0.54483	0.41429	0.43454
285.85		0.84517	0.53018	0.41971	0.41773
287.33		0.84818	0.54261	0.41319	0.44154
288.8		0.82633	0.53917	0.4185	0.42554
290.27		0.83521	0.55624	0.41427	0.43865
291.75		0.8258	0.53721	0.42898	0.43385
293.22		0.8355	0.55975	0.44003	0.43782
294.69		0.86337	0.55448	0.42237	0.42888
296.17		0.84988	0.55209	0.43374	0.4326
297.64		0.86153	0.56082	0.42165	0.43473
299.12		0.86369	0.53078	0.44588	0.43615
300.59		0.81794	0.52656	0.41441	0.4251
302.06		0.85672	0.55317	0.41878	0.44039
303.54		0.8353	0.54863	0.41379	0.43722
305.01		0.82517	0.54121	0.42604	0.4192
306.48		0.8537	0.54424	0.41995	0.44815
307.96		0.84704	0.55801	0.43384	0.43729
309.43		0.84002	0.55753	0.4165	0.44008
310.9		0.84408	0.52678	0.42268	0.43642
312.38		0.84403	0.56878	0.40763	0.44577
313.85		0.8331	0.56884	0.42461	0.43364
315.32		0.85623	0.55936	0.4174	0.44236
316.8		0.85254	0.54271	0.4312	0.43829
318.27		0.84335	0.55238	0.43436	0.43349
319.74		0.86142	0.56706	0.42921	0.43267
321.22		0.84701	0.57362	0.44175	0.43857
322.69		0.852	0.55292	0.42531	0.43963
324.16		0.86363	0.55903	0.41322	0.43488
325.64		0.84502	0.52983	0.43754	0.44347
327.11		0.85754	0.55992	0.41859	0.43856
328.58		0.85472	0.55911	0.4344	0.45654
330.06		0.86643	0.53789	0.43147	0.42778
331.53		0.84583	0.5692	0.4302	0.4383
333.01		0.86576	0.57177	0.42457	0.43276
334.48		0.86248	0.55334	0.43806	0.44903
335.95		0.84689	0.56834	0.42393	0.44023
337.43		0.84972	0.56115	0.41079	0.43034
338.9		0.85884	0.53439	0.42635	0.42425
340.37		0.8648	0.5648	0.42867	0.4453
341.85		0.85237	0.58579	0.41461	0.4398
343.32		0.84282	0.56019	0.41359	0.43509
344.79		0.87148	0.55814	0.43112	0.43407
346.27		0.85467	0.59021	0.41247	0.44237
347.74		0.85615	0.56267	0.4433	0.4442
349.21		0.86131	0.55789	0.41206	0.44676
350.69		0.86352	0.56319	0.42643	0.43109
352.16		0.88519	0.56294	0.41202	0.45219
353.63		0.84869	0.56907	0.42376	0.43452
355.11		0.86888	0.56415	0.42959	0.43456
356.58		0.83899	0.55122	0.44457	0.4421
358.05		0.85274	0.57569	0.43104	0.43798
359.53		0.84184	0.56297	0.4356	0.45649
361		0.85604	0.57221	0.42131	0.45863
362.47		0.83751	0.56175	0.42328	0.43831
363.95		0.85042	0.58605	0.42982	0.44838
365.42		0.85982	0.56349	0.41459	0.43581
366.89		0.86547	0.5959	0.43077	0.43764
368.37		0.87175	0.55955	0.44325	0.43944
369.84		0.85642	0.58469	0.40994	0.43255
371.32		0.88124	0.56737	0.42763	0.42817
372.79		0.86085	0.59178	0.4307	0.44481
374.26		0.85623	0.56525	0.44601	0.44737
375.74		0.86704	0.56895	0.43672	0.4479
377.21		0.86245	0.56025	0.42327	0.45268
378.68		0.85164	0.57178	0.42587	0.45644
380.16		0.85675	0.57546	0.42973	0.43163
381.63		0.88771	0.58344	0.41947	0.4401
383.1		0.87856	0.57347	0.43487	0.45757
384.58		0.87231	0.59027	0.4173	0.43779
386.05		0.85432	0.57557	0.42974	0.45285
387.52		0.87184	0.57428	0.41516	0.45123
389		0.86148	0.56449	0.4435	0.45162
390.47		0.84852	0.57094	0.4203	0.44841
391.94		0.87235	0.58668	0.43125	0.46102
393.42		0.88314	0.58136	0.42821	0.44259
394.89		0.85874	0.58863	0.42904	0.44238
396.36		0.86468	0.56234	0.43535	0.4545
397.84		0.8662	0.58011	0.42788	0.44135
399.31		0.84769	0.59807	0.42536	0.45828
400.78		0.86014	0.58156	0.4165	0.44374
402.26		0.85083	0.57937	0.43058	0.46273
403.73		0.85092	0.58491	0.41671	0.44587
405.21		0.86368	0.5646	0.43691	0.45037
406.68		0.86432	0.58351	0.42796	0.44948
408.15		0.87449	0.55795	0.43833	0.43733
409.63		0.86128	0.5848	0.44414	0.45545
411.1		0.86279	0.58705	0.42736	0.43677
412.57		0.84561	0.56436	0.43688	0.45218
414.05		0.84855	0.57784	0.44031	0.44948
415.52		0.86782	0.57899	0.43613	0.43926
416.99		0.87016	0.58386	0.43229	0.44709
418.47		0.88137	0.58017	0.44039	0.45271
419.94		0.87405	0.58092	0.4325	0.44533
421.41		0.87039	0.59323	0.42595	0.43152
422.89		0.84393	0.57846	0.45336	0.45562
424.36		0.85933	0.57443	0.44248	0.42964
425.83		0.85338	0.58239	0.43357	0.43129
427.31		0.86875	0.59651	0.42001	0.44812
428.78		0.85718	0.60041	0.41929	0.44631
430.25		0.87523	0.59101	0.42537	0.44314
431.73		0.8504	0.57676	0.42216	0.44276
433.2		0.8983	0.5959	0.43045	0.44695
434.67		0.85899	0.58655	0.42581	0.45901
436.15		0.86453	0.58706	0.43053	0.44976
437.62		0.8781	0.58634	0.42579	0.44069
439.1		0.86135	0.59002	0.42413	0.45643
440.57		0.84781	0.59048	0.42337	0.45115
442.04		0.84806	0.60252	0.44288	0.44928
443.52		0.86445	0.60343	0.44399	0.44635
444.99		0.86475	0.60022	0.42595	0.44876
446.46		0.85004	0.60385	0.42338	0.45716
447.94		0.86525	0.61334	0.43369	0.4508
449.41		0.85093	0.58267	0.43666	0.44993
450.88		0.85554	0.61503	0.43794	0.45388
452.36		0.87096	0.58714	0.43763	0.46322
453.83		0.86636	0.59391	0.43831	0.44076
455.3		0.85425	0.59106	0.44376	0.45797
456.78		0.87664	0.61137	0.44054	0.43744
458.25		0.88899	0.6068	0.43051	0.44938
459.72		0.85582	0.59554	0.44037	0.45594
461.2		0.85023	0.61421	0.4323	0.45038
462.67		0.86106	0.61169	0.4163	0.45982
464.14		0.86131	0.58811	0.4475	0.44243
465.62		0.86782	0.61336	0.4345	0.44618
467.09		0.86275	0.59784	0.43133	0.4518
468.56		0.87138	0.59605	0.43467	0.44856
470.04		0.85657	0.60926	0.43175	0.44581
471.51		0.85142	0.60297	0.42566	0.46563
472.98		0.88257	0.61165	0.43692	0.4574
474.46		0.88212	0.60764	0.44157	0.46002
475.93		0.85907	0.61309	0.43304	0.45788
477.41		0.87147	0.6355	0.41308	0.44528
478.88		0.86312	0.60955	0.42481	0.44728
480.35		0.86281	0.59508	0.41125	0.45141
481.83		0.86395	0.61115	0.43075	0.4615
483.3		0.85313	0.5877	0.42129	0.44991
484.77		0.87685	0.60513	0.41974	0.45195
486.25		0.86749	0.61884	0.4274	0.46772
487.72		0.86408	0.59503	0.42244	0.44814
489.19		0.8417	0.61063	0.41294	0.48128
490.67		0.87733	0.60978	0.43505	0.44817
492.14		0.86643	0.60415	0.42481	0.44489
493.61		0.8813	0.61521	0.43463	0.47284
495.09		0.89476	0.59947	0.43087	0.46185
496.56		0.8943	0.59921	0.42635	0.44588
498.03		0.85381	0.57734	0.45422	0.45731
499.51		0.86871	0.60429	0.42256	0.45449
500.98		0.88922	0.62003	0.44187	0.44465
502.45		0.85578	0.60913	0.42175	0.4687
503.93		0.87856	0.59255	0.43632	0.44618
505.4		0.86991	0.59438	0.43557	0.45531
506.87		0.87287	0.60462	0.43223	0.45572
508.35		0.88249	0.61929	0.4261	0.46691
509.82		0.87747	0.63058	0.43904	0.46225
511.3		0.84081	0.61332	0.43957	0.45254
512.77		0.85666	0.62671	0.44635	0.46481
514.24		0.88085	0.60117	0.44515	0.45494
515.72		0.86525	0.59167	0.4428	0.44452
517.19		0.88401	0.60019	0.45055	0.45864
518.66		0.85485	0.61407	0.441	0.46603
520.14		0.87062	0.60511	0.451	0.44233
521.61		0.87627	0.61338	0.4311	0.47095
523.08		0.86693	0.60612	0.44166	0.45188
524.56		0.8651	0.60022	0.43831	0.45799
526.03		0.86461	0.61589	0.4296	0.45101
527.5		0.86125	0.60223	0.44183	0.46541
528.98		0.89541	0.60565	0.44784	0.44757
530.45		0.88539	0.6176	0.43683	0.46164
531.92		0.85594	0.60818	0.42724	0.45872
533.4		0.86537	0.59749	0.44432	0.45237
534.87		0.87412	0.60388	0.45451	0.45305
536.34		0.86813	0.62217	0.42563	0.4467
537.82		0.86294	0.61892	0.4348	0.46296
539.29		0.86255	0.62989	0.43256	0.45643
540.76		0.86295	0.61712	0.44216	0.46153
542.24		0.89325	0.62342	0.43765	0.45773
543.71		0.87037	0.60373	0.44007	0.46287
545.19		0.86518	0.61577	0.43595	0.45267
546.66		0.86234	0.62041	0.44075	0.46518
548.13		0.86947	0.60226	0.45538	0.45962
549.61		0.88046	0.62235	0.43028	0.4648
551.08		0.88668	0.63246	0.44446	0.45669
552.55		0.86051	0.60261	0.43388	0.46507
554.03		0.89665	0.62182	0.41724	0.44982
555.5		0.87152	0.63566	0.43372	0.46216
556.97		0.86374	0.61645	0.44409	0.45916
558.45		0.86862	0.61668	0.44054	0.47715
559.92		0.87887	0.62574	0.43308	0.45628
561.39		0.88014	0.63552	0.45716	0.45811
562.87		0.88387	0.62301	0.43611	0.44661
564.34		0.86621	0.61869	0.45643	0.45577
565.81		0.87138	0.62638	0.43053	0.46282
567.29		0.8643	0.62442	0.42725	0.46226
568.76		0.86904	0.63367	0.43821	0.44396
570.23		0.8855	0.60891	0.44158	0.46117
571.71		0.86133	0.65772	0.44496	0.46601
573.18		0.87971	0.63828	0.44306	0.44537
574.65		0.8739	0.63862	0.43821	0.46018
576.13		0.87986	0.63711	0.44849	0.47161
577.6		0.88437	0.63568	0.44333	0.46388
579.08		0.87548	0.61664	0.43088	0.46586
580.55		0.89076	0.62326	0.436	0.46136
582.02		0.89076	0.6319	0.4313	0.46253
583.5		0.86589	0.6345	0.4391	0.45743
584.97		0.8658	0.64376	0.45394	0.46339
586.44		0.87981	0.62212	0.42194	0.46004
587.92		0.87031	0.62094	0.42854	0.4622
589.39		0.85205	0.65147	0.43704	0.46779
590.86		0.88627	0.61855	0.42282	0.46257
592.34		0.8733	0.63128	0.44696	0.46439
593.81		0.86668	0.61972	0.42543	0.46701
595.28		0.88216	0.64128	0.45023	0.44973
596.76		0.8769	0.63092	0.44103	0.47136
598.23		0.87602	0.62983	0.43029	0.46554
599.7		0.88448	0.62035	0.4426	0.47294
601.18		0.86402	0.63986	0.44422	0.46448
602.65		0.88181	0.64219	0.43195	0.46097
604.12		0.89104	0.62339	0.42397	0.46531
605.6		0.87003	0.63027	0.43788	0.45942
607.07		0.87829	0.64062	0.44589	0.46928
608.54		0.86966	0.63969	0.45316	0.46405
610.02		0.88233	0.62972	0.44255	0.45328
611.49		0.88507	0.6379	0.44757	0.4596
612.96		0.86947	0.61427	0.43572	0.45822
614.44		0.89589	0.64246	0.44655	0.47212
615.91		0.87348	0.62183	0.43847	0.47096
617.39		0.87152	0.62928	0.43746	0.46887
618.86		0.86479	0.64408	0.44543	0.46661
620.33		0.87884	0.65508	0.4256	0.4658
621.81		0.8762	0.64408	0.44694	0.46066
623.28		0.87398	0.63692	0.42555	0.46424
624.75		0.89155	0.63984	0.42359	0.48384
626.23		0.84642	0.63665	0.44372	0.46794
627.7		0.89038	0.61498	0.44104	0.46366
629.17		0.85958	0.64602	0.44071	0.47672
630.65		0.88452	0.63909	0.42575	0.46577
632.12		0.8886	0.63559	0.42696	0.466
633.59		0.87429	0.62903	0.44257	0.45644
635.07		0.89607	0.6298	0.43107	0.46208
636.54		0.86263	0.6237	0.42208	0.46101
638.01		0.86688	0.65633	0.43967	0.46485
639.49		0.88321	0.61904	0.43445	0.46649
640.96		0.8694	0.63556	0.45118	0.45517
642.43		0.87371	0.65183	0.44681	0.4728
643.91		0.8909	0.67162	0.43645	0.4765
645.38		0.89346	0.63934	0.43675	0.44577
646.85		0.8842	0.64279	0.43455	0.47047
648.33		0.86924	0.6188	0.42988	0.4653
649.8		0.88077	0.63597	0.43528	0.47329
651.28		0.8819	0.64525	0.44148	0.45986
652.75		0.86665	0.64524	0.42479	0.46192
654.22		0.87417	0.6521	0.42674	0.44853
655.7		0.89134	0.63767	0.44855	0.46643
657.17		0.89425	0.63128	0.44778	0.46215
658.64		0.89692	0.65024	0.42314	0.47207
660.12		0.87094	0.63329	0.44864	0.46565
661.59		0.89643	0.62989	0.43077	0.46508
663.06		0.88121	0.63634	0.43951	0.45749
664.54		0.87257	0.63892	0.45033	0.46853
666.01		0.87306	0.6668	0.4359	0.47396
667.48		0.8763	0.63386	0.44009	0.47438
668.96		0.88469	0.64715	0.43793	0.4593
670.43		0.88233	0.65506	0.42772	0.46858
671.9		0.87661	0.64803	0.43227	0.46997
673.38		0.88999	0.64783	0.43381	0.47024
674.85		0.88001	0.63194	0.43907	0.46006
676.32		0.88233	0.64374	0.44651	0.472
677.8		0.89206	0.66373	0.43288	0.46262
679.27		0.89898	0.63035	0.44735	0.48549
680.74		0.88023	0.63326	0.44177	0.48001
682.22		0.87889	0.65108	0.44229	0.4699
683.69		0.8669	0.66434	0.44623	0.47887
685.17		0.89098	0.63514	0.4313	0.45635
686.64		0.87476	0.6433	0.43847	0.4666
688.11		0.87299	0.66373	0.43227	0.48056
689.59		0.88594	0.64302	0.44095	0.4614
691.06		0.88159	0.65132	0.43508	0.47624
692.53		0.88773	0.62947	0.43101	0.48069
694.01		0.88883	0.64045	0.44265	0.46456
695.48		0.87572	0.66832	0.43231	0.46751
696.95		0.87456	0.65293	0.44451	0.47878
698.43		0.86552	0.66267	0.44171	0.46864
699.9		0.86233	0.65691	0.44812	0.46303
701.37		0.86442	0.66299	0.43871	0.47434
702.85		0.88226	0.64164	0.4448	0.46616
704.32		0.87958	0.65241	0.44098	0.47621
705.79		0.85208	0.65632	0.44854	0.46452
707.27		0.88117	0.61342	0.44966	0.47316
708.74		0.8887	0.66678	0.46151	0.4675
710.21		0.89088	0.65088	0.46026	0.47998
711.69		0.88092	0.64176	0.44212	0.46732
713.16		0.87533	0.67183	0.43334	0.46683
714.63		0.87877	0.62003	0.45039	0.47544
716.11		0.86673	0.64926	0.44267	0.46153
717.58		0.89808	0.64624	0.4261	0.45692
719.06		0.86574	0.64858	0.44234	0.46073
720.53		0.88083	0.64027	0.45002	0.4603
722		0.87469	0.66703	0.44627	0.46697
723.48		0.87871	0.63297	0.43833	0.46964
724.95		0.8749	0.6591	0.42509	0.46047
726.42		0.87609	0.66092	0.41792	0.46184
727.9		0.87146	0.66922	0.4476	0.46634
729.37		0.88549	0.65724	0.42405	0.46824
730.84		0.88402	0.66107	0.44429	0.46585
732.32		0.86987	0.65944	0.4369	0.47402
733.79		0.87996	0.67428	0.44141	0.48015
735.26		0.89031	0.67082	0.4508	0.4633
736.74		0.90186	0.65273	0.44845	0.47528
738.21		0.88489	0.63287	0.43914	0.46661
739.68		0.89707	0.64251	0.44337	0.46921
741.16		0.8836	0.65376	0.4548	0.46759
742.63		0.8969	0.65846	0.45659	0.46935
744.1		0.88568	0.64829	0.462	0.46768
745.58		0.88524	0.6482	0.43703	0.46551
747.05		0.88222	0.64484	0.43567	0.47161
748.52		0.85799	0.66686	0.43563	0.46468
750		0.86824	0.64974	0.4312	0.47476
751.47		0.87478	0.65999	0.44044	0.46489
752.94		0.8939	0.64339	0.45456	0.46154
754.42		0.90866	0.64265	0.45433	0.47262
755.89		0.89027	0.65521	0.42789	0.45992
757.37		0.88547	0.65666	0.43575	0.47549
758.84		0.89757	0.65188	0.43972	0.46948
760.31		0.86659	0.65381	0.44866	0.47017
761.79		0.86497	0.65319	0.43122	0.45798
763.26		0.87367	0.68335	0.44622	0.46831
764.73		0.88416	0.65276	0.43464	0.46629
766.21		0.87359	0.657	0.45162	0.46604
767.68		0.88474	0.65938	0.44127	0.47305
769.15		0.88111	0.65324	0.44341	0.45782
770.63		0.88451	0.66266	0.45321	0.47077
772.1		0.87563	0.65814	0.4525	0.47179
773.57		0.88975	0.66472	0.44906	0.48036
775.05		0.87128	0.67242	0.43128	0.46945
776.52		0.88476	0.65229	0.46076	0.4653
777.99		0.87689	0.65568	0.44407	0.47489
779.47		0.88867	0.66271	0.44605	0.46411
780.94		0.88388	0.65742	0.43785	0.487
782.41		0.87717	0.65799	0.45759	0.46697
783.89		0.89837	0.66173	0.44712	0.47056
785.36		0.88808	0.65612	0.44512	0.4659
786.83		0.87601	0.66524	0.43271	0.4716
788.31		0.89439	0.6548	0.43657	0.46285
789.78		0.8917	0.65701	0.41814	0.46609
791.26		0.88798	0.67381	0.44487	0.46032
792.73		0.88407	0.6512	0.43537	0.46993
794.2		0.88132	0.68148	0.44082	0.47004
795.68		0.89028	0.65782	0.43506	0.478
797.15		0.88301	0.66029	0.44348	0.47265
798.62		0.8706	0.68709	0.45844	0.47784
800.1		0.8886	0.67876	0.44491	0.47692
801.57		0.88134	0.66492	0.44021	0.47734
803.04		0.90219	0.66927	0.43209	0.46558
804.52		0.88692	0.66144	0.42078	0.47556
805.99		0.8708	0.68219	0.45214	0.47064
807.46		0.87929	0.66522	0.44723	0.48163
808.94		0.85913	0.65552	0.42587	0.46387
810.41		0.87274	0.6738	0.4292	0.4798
811.88		0.86255	0.67316	0.42718	0.48303
813.36		0.8908	0.66384	0.43773	0.46613
814.83		0.87594	0.67553	0.44011	0.46224
816.3		0.86633	0.6718	0.45151	0.45539
817.78		0.87467	0.65731	0.45016	0.46842
819.25		0.90207	0.66628	0.42499	0.48224
820.72		0.89032	0.68388	0.45293	0.48369
822.2		0.90409	0.66216	0.44591	0.4705
823.67		0.88256	0.65746	0.44738	0.47635
825.15		0.86157	0.6501	0.43842	0.48851
826.62		0.88965	0.67484	0.45256	0.48731
828.09		0.89929	0.68872	0.43356	0.47237
829.57		0.88716	0.67742	0.41729	0.47591
831.04		0.88463	0.68575	0.43392	0.4642
832.51		0.88962	0.66375	0.44108	0.47393
833.99		0.87758	0.66619	0.4417	0.46015
835.46		0.88939	0.68994	0.42633	0.46748
836.93		0.91185	0.66614	0.42546	0.44913
838.41		0.88007	0.67355	0.43129	0.47105
839.88		0.88219	0.6648	0.43644	0.45903
841.35		0.89068	0.6744	0.44592	0.47822
842.83		0.86962	0.67792	0.42978	0.47735
844.3		0.89374	0.66504	0.43403	0.45363
845.77		0.88807	0.6774	0.4278	0.47475
847.25		0.86341	0.66387	0.44956	0.47095
848.72		0.87039	0.69065	0.43233	0.47142
850.19		0.89202	0.66797	0.44432	0.46801
851.67		0.84873	0.67649	0.43148	0.46601
853.14		0.88855	0.67536	0.45063	0.48404
854.61		0.88732	0.66158	0.43944	0.48598
856.09		0.88516	0.66217	0.44192	0.46946
857.56		0.89714	0.67734	0.43856	0.47233
859.04		0.86968	0.66597	0.42468	0.46724
860.51		0.84911	0.67215	0.45008	0.46681
861.98		0.86334	0.67956	0.45912	0.47083
863.46		0.89946	0.68131	0.43424	0.46462
864.93		0.89959	0.67323	0.43784	0.47083
866.4		0.86996	0.67511	0.4375	0.47391
867.88		0.87855	0.67834	0.44761	0.48008
869.35		0.87362	0.66883	0.43148	0.4693
870.82		0.90503	0.68029	0.43862	0.46751
872.3		0.89103	0.68899	0.43999	0.46661
873.77		0.88495	0.68852	0.43988	0.47018
875.24		0.90915	0.65888	0.44048	0.47517
876.72		0.90052	0.66951	0.44423	0.47861
878.19		0.87815	0.68169	0.44529	0.47369
879.66		0.90449	0.65402	0.43271	0.46105
881.14		0.88787	0.67625	0.4179	0.46877
882.61		0.90089	0.67456	0.44085	0.46823
884.08		0.88076	0.65404	0.42372	0.45806
885.56		0.88333	0.66129	0.44184	0.46516
887.03		0.88947	0.6832	0.4283	0.4871
888.5		0.87299	0.68274	0.43125	0.48728
889.98		0.89666	0.66243	0.43937	0.48426
891.45		0.87552	0.67688	0.44911	0.48011
892.92		0.87588	0.68827	0.43973	0.47256
894.4		0.87035	0.6527	0.43084	0.47255
895.87		0.86086	0.68274	0.44392	0.47829
897.35		0.89613	0.67654	0.44157	0.47516
898.82		0.89203	0.65651	0.43592	0.47874
900.29		0.86403	0.67693	0.44411	0.48071
901.77		0.87049	0.69956	0.42822	0.49081
903.24		0.86511	0.674	0.4275	0.48377
904.71		0.90583	0.66421	0.44247	0.46694
906.19		0.9054	0.67162	0.4554	0.4841
907.66		0.87761	0.69282	0.44345	0.4765
909.13		0.88326	0.66388	0.42129	0.46139
910.61		0.89812	0.67823	0.43232	0.47601
912.08		0.8983	0.68432	0.4486	0.46285
913.55		0.88054	0.68642	0.44765	0.46683
915.03		0.87698	0.69138	0.4312	0.47522
916.5		0.86092	0.70321	0.42802	0.47925
917.97		0.89906	0.67599	0.43195	0.47238
919.45		0.87595	0.68613	0.42797	0.48278
920.92		0.88339	0.68296	0.44144	0.47315
922.39		0.8917	0.6706	0.45377	0.47337
923.87		0.87088	0.6783	0.42203	0.46995
925.34		0.90122	0.67698	0.42714	0.47582
926.81		0.84978	0.6789	0.45462	0.48582
928.29		0.89948	0.67053	0.44564	0.46839
929.76		0.88951	0.67886	0.46968	0.47597
931.24		0.89288	0.70067	0.45493	0.48066
932.71		0.89938	0.67157	0.43863	0.47142
934.18		0.89059	0.66883	0.43667	0.47043
935.66		0.86949	0.68484	0.4485	0.46687
937.13		0.90012	0.68066	0.42893	0.47055
938.6		0.88026	0.67948	0.45877	0.47975
940.08		0.87457	0.66813	0.44949	0.48848
941.55		0.89059	0.67918	0.45167	0.48981
943.02		0.87274	0.67631	0.44905	0.46956
944.5		0.88619	0.66687	0.43314	0.47939
945.97		0.89402	0.68785	0.44344	0.47675
947.44		0.88833	0.70727	0.43488	0.4719
948.92		0.88729	0.69879	0.44084	0.47446
950.39		0.88768	0.69023	0.43081	0.47341
951.86		0.88256	0.68893	0.43536	0.46366
953.34		0.86012	0.66985	0.45559	0.46142
954.81		0.88766	0.70439	0.43809	0.47422
956.28		0.88204	0.68539	0.43248	0.46496
957.76		0.87938	0.68551	0.43008	0.46767
959.23		0.878	0.70006	0.43856	0.46578
960.7		0.88404	0.68797	0.44655	0.47081
962.18		0.88707	0.68457	0.44387	0.46835
963.65		0.8826	0.67284	0.43148	0.47416
965.13		0.89427	0.67154	0.44431	0.47672
966.6		0.90169	0.68645	0.43669	0.47173
968.07		0.89195	0.68257	0.43504	0.47726
969.55		0.89138	0.67889	0.42987	0.47741
971.02		0.84887	0.68983	0.45869	0.46593
972.49		0.89514	0.70167	0.45241	0.47899
973.97		0.8965	0.67925	0.4318	0.48199
975.44		0.88962	0.67945	0.45641	0.47334
976.91		0.88972	0.67557	0.43955	0.46425
978.39		0.87461	0.69173	0.44702	0.47253
979.86		0.90735	0.70558	0.43075	0.48207
981.33		0.88398	0.67822	0.43358	0.4646
982.81		0.89443	0.68969	0.43878	0.47314
984.28		0.89511	0.68276	0.45773	0.47624
985.75		0.89523	0.66695	0.45316	0.47438
987.23		0.88384	0.67583	0.43178	0.48477
988.7		0.88529	0.69079	0.44621	0.47908
990.17		0.88311	0.67574	0.43553	0.46624
991.65		0.87182	0.68559	0.43704	0.47825
993.12		0.8804	0.70222	0.44239	0.49165
994.59		0.87701	0.70161	0.42751	0.46669
996.07		0.88757	0.69213	0.43689	0.48517
997.54		0.90163	0.68554	0.45363	0.47965
999.02		0.87814	0.70575	0.43775	0.46816
1000.5		0.90621	0.69113	0.4328	0.45689
1002		0.8779	0.66648	0.45606	0.48723
1003.4		0.88228	0.70576	0.44186	0.4643
1004.9		0.886	0.71017	0.46067	0.48191
1006.4		0.86868	0.68247	0.44608	0.47566
1007.9		0.87372	0.6909	0.45051	0.47924
1009.3		0.87262	0.67938	0.44317	0.46709
1010.8		0.89239	0.6927	0.4553	0.46768
1012.3		0.87405	0.69805	0.44778	0.46277
1013.7		0.89336	0.67831	0.44765	0.46907
1015.2		0.90258	0.68415	0.44676	0.47075
1016.7		0.88116	0.67715	0.44294	0.46883
1018.2		0.87638	0.70038	0.43834	0.47237
1019.6		0.86595	0.67444	0.4379	0.46557
1021.1		0.86822	0.70394	0.43878	0.47606
1022.6		0.89081	0.69659	0.4485	0.47006
1024.1		0.87946	0.69411	0.44286	0.48416
1025.5		0.88857	0.69011	0.4377	0.47636
1027		0.87706	0.65906	0.4485	0.47249
1028.5		0.88285	0.68408	0.44069	0.47269
1030		0.8937	0.68257	0.44503	0.46947
1031.4		0.88949	0.6995	0.42497	0.47655
1032.9		0.87791	0.69052	0.43012	0.47479
1034.4		0.89088	0.71163	0.45665	0.47281
1035.9		0.88344	0.70408	0.43727	0.47262
1037.3		0.88441	0.68157	0.43563	0.47703
1038.8		0.8853	0.69394	0.43608	0.48785
1040.3		0.88815	0.70722	0.45093	0.47644
1041.7		0.89281	0.70106	0.43917	0.46686
1043.2		0.86574	0.70511	0.44637	0.47741
1044.7		0.88022	0.6832	0.43369	0.4828
1046.2		0.89959	0.70446	0.4493	0.47946
1047.6		0.89014	0.68513	0.43371	0.46821
1049.1		0.87788	0.69046	0.43382	0.48368
1050.6		0.89459	0.69192	0.43174	0.47172
1052.1		0.89868	0.69143	0.45295	0.48665
1053.5		0.88604	0.70303	0.44003	0.47361
1055		0.887	0.69588	0.43562	0.47836
1056.5		0.84544	0.69514	0.4394	0.47752
1058		0.88999	0.70674	0.45238	0.48428
1059.4		0.86691	0.7051	0.45972	0.47889
1060.9		0.88668	0.68864	0.46357	0.47539
1062.4		0.88634	0.69425	0.45492	0.48206
1063.8		0.89333	0.69644	0.44196	0.47513
1065.3		0.8798	0.7254	0.4418	0.48612
1066.8		0.88759	0.70533	0.44847	0.48274
1068.3		0.88511	0.72481	0.43531	0.48502
1069.7		0.8875	0.70465	0.43838	0.48417
1071.2		0.89834	0.69406	0.42544	0.47692
1072.7		0.88225	0.69566	0.43778	0.47853
1074.2		0.88439	0.69582	0.43124	0.48179
1075.6		0.87163	0.68923	0.45259	0.47233
1077.1		0.89029	0.69434	0.45229	0.46186
1078.6		0.87558	0.69218	0.45759	0.47808
1080.1		0.8897	0.71212	0.45956	0.46882
1081.5		0.89508	0.70565	0.44298	0.47005
1083		0.88371	0.71234	0.46934	0.48103
1084.5		0.87992	0.70694	0.45547	0.48522
1085.9		0.86357	0.7156	0.4405	0.48538
1087.4		0.88528	0.70397	0.44385	0.48735
1088.9		0.87767	0.70865	0.45287	0.48369
1090.4		0.88208	0.70199	0.42937	0.48881
1091.8		0.88377	0.71758	0.43796	0.47372
1093.3		0.89015	0.71237	0.45521	0.46485
1094.8		0.89115	0.70869	0.43199	0.48472
1096.3		0.89248	0.71849	0.44128	0.46305
1097.7		0.90038	0.69889	0.44167	0.473
1099.2		0.90454	0.71186	0.45285	0.46596
1100.7		0.87994	0.70921	0.44378	0.47258
1102.2		0.87477	0.70744	0.45669	0.4767
1103.6		0.8922	0.70485	0.44346	0.459
1105.1		0.90595	0.69333	0.44464	0.46994
1106.6		0.90541	0.71913	0.44358	0.46254
1108.1		0.86828	0.70441	0.44686	0.4679
1109.5		0.8658	0.70432	0.43924	0.46434
1111		0.89974	0.70802	0.45089	0.47991
1112.5		0.89326	0.70923	0.44527	0.48238
1113.9		0.88459	0.70427	0.43383	0.46962
1115.4		0.88733	0.71487	0.44627	0.4812
1116.9		0.89748	0.69321	0.44979	0.47992
1118.4		0.88909	0.70045	0.43554	0.4795
1119.8		0.90335	0.71013	0.42941	0.46952
1121.3		0.89031	0.67523	0.4555	0.48096
1122.8		0.89148	0.71199	0.45191	0.48756
1124.3		0.87824	0.71804	0.43138	0.47364
1125.7		0.90361	0.72154	0.445	0.47551
1127.2		0.88895	0.69567	0.4322	0.47449
1128.7		0.86386	0.70084	0.43795	0.47755
1130.2		0.87678	0.71338	0.44687	0.48013
1131.6		0.90415	0.71159	0.44994	0.47306
1133.1		0.89299	0.72357	0.4272	0.49559
1134.6		0.88914	0.72491	0.43394	0.47515
1136		0.89386	0.70171	0.44931	0.47274
1137.5		0.87281	0.69485	0.44289	0.4763
1139		0.88144	0.71912	0.45153	0.47479
1140.5		0.87388	0.7283	0.44711	0.4814
1141.9		0.8891	0.71911	0.44234	0.47162
1143.4		0.87459	0.69853	0.45535	0.47259
1144.9		0.88618	0.69442	0.43557	0.48679
1146.4		0.88996	0.69977	0.45126	0.4652
1147.8		0.895	0.71154	0.44242	0.49472
1149.3		0.89018	0.69726	0.43587	0.47434
1150.8		0.90923	0.72755	0.46198	0.47257
1152.3		0.88185	0.71246	0.4384	0.4886
1153.7		0.87716	0.71269	0.44114	0.48254
1155.2		0.88345	0.69936	0.45831	0.45814
1156.7		0.85846	0.69251	0.4353	0.48076
1158.2		0.8841	0.69215	0.45436	0.47067
1159.6		0.89816	0.71652	0.43721	0.48008
1161.1		0.86052	0.70427	0.44755	0.47189
1162.6		0.86471	0.70005	0.43859	0.48181
1164		0.88085	0.70985	0.43945	0.49062
1165.5		0.86183	0.70798	0.44546	0.45769
1167		0.87547	0.71788	0.44516	0.47954
1168.5		0.87306	0.7213	0.43547	0.4656
1169.9		0.86775	0.71039	0.46098	0.47652
1171.4		0.87709	0.71461	0.44517	0.47747
1172.9		0.86148	0.7359	0.44374	0.48272
1174.4		0.88745	0.71521	0.45846	0.47881
1175.8		0.89346	0.6935	0.44211	0.47041
1177.3		0.88658	0.70808	0.44361	0.4768
1178.8		0.88578	0.70438	0.44586	0.4687
1180.3		0.88147	0.72899	0.45223	0.4777
1181.7		0.88183	0.71254	0.44243	0.47542
1183.2		0.8772	0.7169	0.43494	0.47155
1184.7		0.88994	0.72318	0.44807	0.46882
1186.1		0.88289	0.71509	0.42998	0.4793
1187.6		0.88957	0.70886	0.44757	0.49947
1189.1		0.87616	0.71844	0.44826	0.48234
1190.6		0.88329	0.71999	0.43526	0.47589
1192		0.87851	0.70439	0.44445	0.47129
1193.5		0.88579	0.72215	0.43825	0.47577
1195		0.90511	0.70763	0.45064	0.48088
1196.5		0.89426	0.71108	0.43374	0.47947
1197.9		0.8907	0.70887	0.43274	0.48567
1199.4		0.8914	0.72533	0.42446	0.48854
1200.9		0.86885	0.71527	0.44071	0.47432
1202.4		0.89744	0.70662	0.42985	0.47464
1203.8		0.88488	0.7121	0.4324	0.47891
1205.3		0.87866	0.70531	0.43523	0.48481
1206.8		0.89962	0.72836	0.44378	0.49742
1208.2		0.89446	0.69632	0.42674	0.49002
1209.7		0.88741	0.70211	0.42335	0.47396
1211.2		0.86887	0.71531	0.44962	0.47588
1212.7		0.8898	0.72371	0.43209	0.47672
1214.1		0.8971	0.70412	0.45468	0.48209
1215.6		0.88505	0.71789	0.44278	0.49267
1217.1		0.88391	0.7243	0.42513	0.47218
1218.6		0.88298	0.72294	0.44348	0.49745
1220		0.86038	0.72178	0.45022	0.48283
1221.5		0.90201	0.72934	0.44708	0.48501
1223		0.89007	0.71057	0.44707	0.4833
1224.5		0.86762	0.74276	0.42205	0.48336
1225.9		0.86646	0.7205	0.45326	0.47464
1227.4		0.88454	0.72355	0.44297	0.46896
1228.9		0.88487	0.73066	0.44304	0.48167
1230.4		0.88493	0.74225	0.44026	0.48208
1231.8		0.87692	0.71746	0.44318	0.47782
1233.3		0.9059	0.72553	0.45249	0.46995
1234.8		0.89011	0.7142	0.44857	0.47549
1236.2		0.90051	0.7306	0.43278	0.48294
1237.7		0.86004	0.72568	0.45121	0.47493
1239.2		0.8979	0.7318	0.4329	0.4691
1240.7		0.87529	0.72037	0.43385	0.4806
1242.1		0.90058	0.72125	0.4522	0.47843
1243.6		0.89135	0.71851	0.43523	0.48826
1245.1		0.88192	0.6932	0.43398	0.48418
1246.6		0.88595	0.73188	0.45085	0.50051
1248		0.88412	0.71808	0.44144	0.4808
1249.5		0.88351	0.71456	0.42637	0.49196
1251		0.89542	0.72226	0.44922	0.4774
1252.5		0.88219	0.73164	0.45139	0.48622
1253.9		0.87659	0.72514	0.4464	0.49065
1255.4		0.88558	0.72364	0.4353	0.47383
1256.9		0.85374	0.70828	0.45605	0.47987
1258.3		0.87657	0.70855	0.42676	0.48333
1259.8		0.88767	0.72095	0.44756	0.48715
1261.3		0.89176	0.71657	0.42927	0.4681
1262.8		0.87	0.736	0.4384	0.46255
1264.2		0.89459	0.72426	0.45727	0.47807
1265.7		0.88214	0.72904	0.44042	0.48763
1267.2		0.88408	0.71862	0.45435	0.47319
1268.7		0.89981	0.71891	0.43643	0.47269
1270.1		0.88846	0.72736	0.41905	0.48973
1271.6		0.91112	0.69313	0.4322	0.48297
1273.1		0.86587	0.71364	0.45889	0.48373
1274.6		0.86705	0.74337	0.44191	0.49958
1276		0.90574	0.72346	0.42904	0.48122
1277.5		0.87746	0.7162	0.43898	0.48267
1279		0.87192	0.71176	0.43989	0.4993
1280.4		0.87638	0.73125	0.44857	0.48593
1281.9		0.8876	0.71971	0.44945	0.46848
1283.4		0.88399	0.7219	0.43966	0.47538
1284.9		0.89652	0.72627	0.4494	0.47895
1286.3		0.89839	0.71329	0.44039	0.48404
1287.8		0.89535	0.71537	0.42754	0.47664
1289.3		0.89091	0.72967	0.43389	0.47532
1290.8		0.86775	0.72869	0.45325	0.4751
1292.2		0.88177	0.73314	0.43745	0.47773
1293.7		0.8848	0.71706	0.44366	0.4885
1295.2		0.89408	0.71891	0.44164	0.48172
1296.7		0.90778	0.72124	0.45597	0.48489
1298.1		0.8848	0.72729	0.44473	0.4859
1299.6		0.8779	0.7256	0.44293	0.4731
1301.1		0.88612	0.73413	0.44518	0.47795
1302.6		0.87889	0.73185	0.44776	0.47614
1304		0.88605	0.69759	0.44138	0.48239
1305.5		0.90528	0.72258	0.44006	0.46261
1307		0.86775	0.69237	0.44439	0.48095
1308.4		0.90194	0.73107	0.42876	0.47317
1309.9		0.8915	0.74545	0.44431	0.48087
1311.4		0.86655	0.74067	0.43801	0.48683
1312.9		0.88402	0.73035	0.4455	0.47819
1314.3		0.86794	0.73213	0.43734	0.47636
1315.8		0.88446	0.6964	0.45185	0.47842
1317.3		0.89462	0.72284	0.45225	0.48209
1318.8		0.88197	0.71633	0.44325	0.47246
1320.2		0.899	0.72738	0.45425	0.48788
1321.7		0.87762	0.7324	0.4348	0.48048
1323.2		0.88312	0.70765	0.43396	0.4908
1324.7		0.8791	0.7346	0.43433	0.48408
1326.1		0.89787	0.73124	0.43781	0.4888
1327.6		0.87732	0.7483	0.43269	0.48163
1329.1		0.89412	0.73248	0.43657	0.47631
1330.5		0.87385	0.72195	0.45734	0.48374
1332		0.8865	0.72527	0.4323	0.48447
1333.5		0.87995	0.71822	0.43756	0.48655
1335		0.88754	0.72971	0.45113	0.48117
1336.4		0.87331	0.72753	0.44709	0.48139
1337.9		0.8938	0.71807	0.44517	0.4776
1339.4		0.88758	0.7601	0.4385	0.47685
1340.9		0.89818	0.72829	0.44236	0.48116
1342.3		0.88853	0.7307	0.43409	0.48482
1343.8		0.88667	0.72617	0.4506	0.47352
1345.3		0.87395	0.72798	0.4392	0.47635
1346.8		0.88271	0.76212	0.42791	0.4755
1348.2		0.87836	0.72476	0.41908	0.47515
1349.7		0.883	0.70437	0.44754	0.47493
1351.2		0.87705	0.73598	0.44147	0.48579
1352.6		0.89116	0.71751	0.43038	0.48095
1354.1		0.88589	0.73787	0.43355	0.48023
1355.6		0.87192	0.72617	0.45557	0.47462
1357.1		0.87919	0.73081	0.44114	0.49328
1358.5		0.88601	0.73293	0.44402	0.48722
1360		0.90251	0.742	0.43421	0.48046
1361.5		0.87092	0.7237	0.44661	0.47711
1363		0.8765	0.72066	0.44003	0.48134
1364.4		0.87524	0.73501	0.42912	0.48728
1365.9		0.8723	0.74131	0.44369	0.48015
1367.4		0.87647	0.73759	0.4392	0.48329
1368.9		0.8952	0.73675	0.45129	0.48195
1370.3		0.87945	0.74039	0.45638	0.4786
1371.8		0.86899	0.75429	0.44943	0.49576
1373.3		0.88803	0.72813	0.44193	0.48359
1374.8		0.88468	0.75323	0.43268	0.48478
1376.2		0.88277	0.73488	0.45005	0.47991
1377.7		0.87254	0.73748	0.44273	0.48475
1379.2		0.86422	0.72375		0.49751
