# Supplementary material for: Reversing protonation of weakly basic drugs greatly enhances intracellular diffusion and decreases lysosomal sequestration
Source: eLife. 2024 Dec 6;13:RP97255. doi: 10.7554/eLife.97255 (PMC11623935; doi:10.7554/eLife.97255)
Supplement: Figure 9—figure supplement 1—source data 1. [file elife-97255-fig9-figsupp1-data1.xlsx]

## Sheet: F9-FS1-A-B
in HeLa	Combined Dconfocal (um2s-1)	Molecular Weight (MW in Da)	No. of Aromatic Rings	Dependency of Dconfocal rates on MW, number of aromatic rings
Fluorescein in Cytoplasm	38.48±1.97	332	4
CCF2 in Cytoplasm	16.28±0.76	856	6
CF514 in Cytoplasm	26.27±1.9	1216	_
GSK3 inhib. in Cytoplasm	0.61±0.03	371	4
Quinacrine in Cytoplasm	2.45±0.09	472.9	3
Mitoxantrone in Cytoplasm	0.28±0.01	444.5	3
