# Supplementary material for: Reversing protonation of weakly basic drugs greatly enhances intracellular diffusion and decreases lysosomal sequestration
Source: eLife. 2024 Dec 6;13:RP97255. doi: 10.7554/eLife.97255 (PMC11623935; doi:10.7554/eLife.97255)
Supplement: Figure 9—source data 1. [file elife-97255-fig9-data1.xlsx]

## Sheet: Figure 9A
	Combined Dconfocal (um2s-1)	Standard Error	Percentage Error			Dconfocal of small molecules in PBS buffer*
Fluorescein in PBS	56.51	2.42	4.28
CCF2 in PBS	33.004	1.98	6
CF514 in PBS	61.145	3	4.9
5-AM Fluorescein in PBS	65.493	8.1	12.34
GSK3 inhib. in DMEM Media	3.9891	0.442	11.08
Quinacrine in PBS	41.861	3.04	7.25

## Sheet: Figure 9B
	Combined Dconfocal (um2s-1)	Standard Error	Percentage Error			Dconfocal of small molecules inside HeLa cells
Fluorescein in Cytoplasm	38.48	1.97822	5.14095
Fluorescein in Nucleus	43.189	2.16944	5.02309
CCF2 in Cytoplasm	16.28	0.759298	4.66389
CCF2 in Nucleus	23.7	1.15232	4.86218
CF514 in Cytoplasm	26.266	1.89512	7.2152
CF514 in Nucleus	29.247	1.99499	6.82122
GSK3 inhib. in Cytoplasm	0.61208	0.0337654	5.51647
Quinacrine in Cytoplasm	2.4525	0.0927235	3.78071
Mitoxantrone in Cytoplasm	0.28264	0.0112	4

## Sheet: Figure 9C-D
in HeLa	Combined Dconfocal (um2s-1)	pKa	logP
Fluorescein in Cytoplasm	38.48±1.97	2.85	2.65
CCF2 in Cytoplasm	16.28±0.76	5.1	4.5
CF514 in Cytoplasm	26.27±1.9	3	_
GSK3 inhib. in Cytoplasm	0.61±0.03	7	4.5
Quinacrine in Cytoplasm	2.45±0.09	10.33	5.15
Mitoxantrone in Cytoplasm	0.28±0.01	9.08	1.19
